# Supplementary material for: NamiRNA-mediated high expression of KNSTRN correlates with poor prognosis and tumor immune infiltration of hepatocellular carcinoma
Source: Research Square preprint supplement (doi:10.21203/rs.3.rs-3032233/v1), 2023-06-26
Supplement: Supplementary file 1 [file 2e77557bba31046b1d2fcda6.xlsx]

## Sheet: KNSTRN Methylation Status and i
KNSTRN Methylation Status and its Prognostic Value
Name	Cancer	HR	CI	P.value	LR_test_pvalue	PH_test_Pvalue	Best_split	CHR	MAPINFO	UCSC_RefGene_Name	UCSC_RefGene_Group	Relation_to_UCSC_CpG_Island
cg01301233	LIHC	0.639	(0.452;0.904)	0.011334	0.0110949	0.691	median	15	40675452	C15orf23	Body	Island
cg04721087	LIHC	0.853	(0.596;1.22)	0.383156	0.379772	0.695	mean	15	40674900	C15orf23	TSS200	N_Shore
cg05993386	LIHC	0.814	(0.563;1.177)	0.274468	0.280557	0.062	q25	15	40675355	C15orf23	Body	Island
cg08036289	LIHC	0.693	(0.486;0.988)	0.0424629	0.0462648	0.152	mean	15	40677854	C15orf23	Body	S_Shelf
cg15674596	LIHC	0.761	(0.536;1.08)	0.125774	0.122701	0.564	mean	15	40675020	C15orf23	1stExon;5'UTR	Island
cg17805752	LIHC	1.662	(1.091;2.53)	0.0179067	0.0133339	0.12	q25	15	40675029	C15orf23	1stExon;5'UTR	Island
cg19947611	LIHC	0.826	(0.581;1.175)	0.288088	0.285151	0.703	mean	15	40674910	C15orf23	TSS200	N_Shore
cg25710630	LIHC	1.344	(0.936;1.929)	0.109163	0.104354	0.001	mean	15	40685225	C15orf23	Body;3'UTR	Open_Sea
cg25947121	LIHC	1.979	(1.228;3.188)	0.0050273	0.00248641	0.577	q25	15	40675737	C15orf23	Body	S_Shore
cg26231582	LIHC	0.779	(0.544;1.115)	0.172668	0.168253	0.66	mean	15	40675627	C15orf23	Body	Island
