# Supplementary material for: NamiRNA-mediated high expression of KNSTRN correlates with poor prognosis and tumor immune infiltration of hepatocellular carcinoma
Source: Research Square preprint supplement (doi:10.21203/rs.3.rs-3032233/v1), 2023-06-26
Supplement: Supplementary file 2 [file 38ffbce9ce87de3a4a5a76fa.xlsx]

## Sheet: Supplementary File.2 Detailed d
Supplementary File.2 Detailed descriptions of differentially expressed genes (DEGs) between the high and low KNSTRN expression group
id	logFC	pvalue	sign
TSPAN6	-0.537017	1.29052e-11	Not sig
TNMD	-1.09467	1.70895e-05	Down
DPM1	0.0580657	0.229134	Not sig
SCYL3	0.00614186	0.916699	Not sig
C1orf112	0.148251	0.188521	Not sig
FGR	0.0689948	0.545394	Not sig
CFH	-0.592113	4.29438e-07	Not sig
FUCA2	-0.0179297	0.818582	Not sig
GCLC	-0.398827	9.10388e-06	Not sig
NFYA	0.400561	3.80329e-09	Not sig
STPG1	0.245907	0.00274776	Not sig
NIPAL3	0.14196	0.0260162	Not sig
LAS1L	-0.141168	0.00928159	Not sig
ENPP4	0.235848	0.0342192	Not sig
SEMA3F	-0.0963878	0.166768	Not sig
CFTR	0.38117	0.243246	Not sig
ANKIB1	0.334964	1.86531e-06	Not sig
CYP51A1	0.200466	0.229408	Not sig
KRIT1	0.0484932	0.319861	Not sig
RAD52	0.154764	0.0177847	Not sig
MYH16	0.296539	0.0730927	Not sig
BAD	-0.192901	0.0090578	Not sig
LAP3	-0.57654	2.20582e-10	Not sig
CD99	-0.150956	0.0268614	Not sig
HS3ST1	0.320741	0.025839	Not sig
AOC1	0.417292	0.0948172	Not sig
WNT16	0.673716	0.00181166	Not sig
HECW1	0.347434	0.101662	Not sig
MAD1L1	-0.270152	0.150412	Not sig
LASP1	0.252397	0.000109393	Not sig
SNX11	-0.134248	0.00768685	Not sig
TMEM176A	-0.602259	4.18102e-08	Not sig
M6PR	0.330936	8.86508e-05	Not sig
KLHL13	0.178423	0.20995	Not sig
CYP26B1	1.46267	2.96289e-11	Up
ICA1	-0.0899595	0.53484	Not sig
DBNDD1	-0.319939	0.0263003	Not sig
ALS2	0.201001	0.000354865	Not sig
CASP10	0.118731	0.0476393	Not sig
CFLAR	-0.0633225	0.148154	Not sig
TFPI	-0.316246	0.010827	Not sig
NDUFAF7	-0.168714	0.000175475	Not sig
RBM5	0.123119	0.00489392	Not sig
MTMR7	0.852919	1.71053e-06	Not sig
SLC7A2	-0.00253906	0.986619	Not sig
ARF5	0.0251732	0.640041	Not sig
SARM1	0.456647	7.84992e-06	Not sig
POLDIP2	-0.274248	1.71462e-07	Not sig
PLXND1	0.041322	0.619181	Not sig
AK2	-0.160468	0.00340855	Not sig
CD38	0.690923	0.000125117	Not sig
FKBP4	0.0107515	0.874778	Not sig
KDM1A	0.204278	0.000186993	Not sig
RBM6	0.0818538	0.111479	Not sig
CAMKK1	-0.203644	0.0598909	Not sig
RECQL	0.552772	5.97688e-08	Not sig
VPS50	0.101082	0.0447708	Not sig
HSPB6	-0.6254	0.000345863	Not sig
ARHGAP33	0.789374	3.51271e-20	Not sig
NDUFAB1	-0.515686	2.40307e-13	Not sig
PDK4	-0.452241	0.00978728	Not sig
SLC22A16	0.316857	0.142921	Not sig
ZMYND10	0.575182	3.41872e-06	Not sig
ABCB5	-0.0389281	0.907153	Not sig
ARX	-0.60979	0.088835	Not sig
SLC25A13	-0.289202	0.000384148	Not sig
ST7	-0.359045	3.90291e-07	Not sig
CDC27	0.238123	7.93255e-09	Not sig
SLC4A1	-1.33306	1.48026e-08	Down
CALCR	1.58217	1.92498e-10	Up
HCCS	-0.0597957	0.233529	Not sig
DVL2	0.290244	9.8529e-06	Not sig
PRSS22	1.68946	4.97708e-08	Up
UPF1	0.103792	0.035722	Not sig
SKAP2	0.156307	0.131146	Not sig
SLC25A5	-0.156509	0.0277949	Not sig
MCUB	0.98979	1.4467e-14	Not sig
HOXA11	1.01436	0.00262789	Up
POLR2J	-0.494857	8.12315e-09	Not sig
DHX33	0.00449822	0.933506	Not sig
MEOX1	0.0848906	0.679885	Not sig
THSD7A	0.374305	0.0084217	Not sig
LIG3	0.155735	0.00250947	Not sig
RPAP3	0.155429	2.35082e-05	Not sig
ACSM3	-0.689553	3.87346e-06	Not sig
REXO5	0.671705	2.50465e-11	Not sig
CIAPIN1	-0.115881	0.0456148	Not sig
SPPL2B	-0.118219	0.0682913	Not sig
FAM214B	-0.0855416	0.161792	Not sig
COPZ2	-0.449452	6.66634e-05	Not sig
PRKAR2B	0.322707	0.0555311	Not sig
MSL3	-0.0105289	0.799561	Not sig
CREBBP	0.130105	0.018684	Not sig
TSPOAP1	0.385143	0.00153835	Not sig
MPO	-0.447873	0.0266054	Not sig
PON1	-0.911577	3.64109e-08	Not sig
GCFC2	-0.113001	0.0389712	Not sig
WDR54	0.511619	7.26264e-06	Not sig
CROT	0.00761409	0.939682	Not sig
ABCB4	-0.856958	1.172e-07	Not sig
KMT2E	0.245712	0.000135823	Not sig
RHBDD2	-0.375838	3.37912e-07	Not sig
SOX8	-0.288584	0.112049	Not sig
IBTK	-0.0190534	0.768096	Not sig
ZNF195	0.363162	3.96622e-11	Not sig
MYCBP2	-0.0228937	0.749938	Not sig
FBXL3	-0.130948	0.031925	Not sig
ITGAL	0.140656	0.194137	Not sig
PDK2	-0.322704	0.000127998	Not sig
ITGA3	1.18352	7.70455e-12	Up
ZFX	0.414943	2.93195e-09	Not sig
LAMP2	-0.292296	0.000110325	Not sig
ITGA2B	0.427075	0.0114572	Not sig
ASB4	-1.06447	2.7382e-07	Down
GDE1	-0.0713479	0.227164	Not sig
REX1BD	-0.508085	2.65477e-08	Not sig
CRLF1	0.386306	0.0513162	Not sig
OSBPL7	0.631584	3.22756e-08	Not sig
TMEM98	0.325072	0.0167011	Not sig
YBX2	0.188415	0.386098	Not sig
KRT33A	-0.419383	0.815215	Not sig
MAP3K14	0.407924	6.35287e-05	Not sig
ABCC8	0.500585	0.0337677	Not sig
CACNG3	-0.00138693	0.997923	Not sig
TMEM132A	1.42943	1.35058e-16	Up
AP2B1	-0.0530137	0.339969	Not sig
TAC1	1.68575	0.00157771	Up
ZNF263	-0.0998885	0.02661	Not sig
CX3CL1	-0.269309	0.0135724	Not sig
SPATA20	-0.00119035	0.98825	Not sig
CACNA1G	0.928779	0.000250459	Not sig
TNFRSF12A	-0.192939	0.100927	Not sig
DLX6	1.48615	0.000739792	Up
MAP3K9	0.448066	8.91878e-09	Not sig
RALA	0.124614	0.00620981	Not sig
BAIAP2L1	0.110893	0.305284	Not sig
KDM7A	0.0040283	0.956482	Not sig
ETV1	0.200279	0.174718	Not sig
AGK	0.0601824	0.278973	Not sig
ALDH3B1	0.535198	2.81469e-06	Not sig
TTC22	0.535688	5.79356e-06	Not sig
PHTF2	0.406127	1.8346e-10	Not sig
CCL26	1.00072	1.96608e-05	Up
FARP2	0.294999	8.62238e-07	Not sig
USH1C	-0.138352	0.67116	Not sig
GGCT	-0.102044	0.215971	Not sig
DBF4	0.765637	5.92341e-32	Not sig
TBXA2R	-0.528344	4.7966e-07	Not sig
IFRD1	-0.213445	0.0146712	Not sig
LGALS14	6.11018	7.49343e-19	Up
COX10	-0.153484	0.0253948	Not sig
GTF2IRD1	0.302339	0.000229905	Not sig
PAF1	-0.188589	0.000826738	Not sig
VPS41	-0.0310113	0.589563	Not sig
ARHGAP44	-0.261596	0.172279	Not sig
ELAC2	-0.215098	9.54667e-05	Not sig
SCIN	1.55089	5.56702e-16	Up
ARSD	-0.470042	3.18252e-07	Not sig
PNPLA4	-0.333245	3.32331e-06	Not sig
MYH13	0.142296	0.700217	Not sig
ADIPOR2	-0.107029	0.144955	Not sig
CDKL3	0.0258697	0.742065	Not sig
UPP2	-0.455431	0.0828113	Not sig
PRSS21	2.03558	1.6792e-12	Up
MARK4	0.0698962	0.267381	Not sig
PROM1	2.00172	4.82435e-11	Up
CCDC124	-0.235507	0.00147978	Not sig
CEACAM21	-0.0304915	0.82764	Not sig
PAFAH1B1	-0.134562	0.00369324	Not sig
NOS2	-0.569259	0.000113252	Not sig
DNAH9	-0.671043	0.00545257	Not sig
KIAA0100	0.0862841	0.167361	Not sig
SLC13A2	1.16892	2.27063e-06	Up
GAS7	0.612161	7.85298e-06	Not sig
TRAPPC6A	-0.482971	8.318e-08	Not sig
MATK	-0.15452	0.219121	Not sig
CEACAM7	2.00741	0.000501199	Up
CD79B	-0.234596	0.0688553	Not sig
SCN4A	-0.58311	9.37072e-06	Not sig
ST7L	0.00198776	0.967465	Not sig
TKTL1	2.48529	2.20899e-20	Up
PAX6	0.160578	0.627831	Not sig
RPUSD1	-0.0591047	0.391248	Not sig
RHBDF1	0.206612	0.0231734	Not sig
LUC7L	-0.0211055	0.753465	Not sig
CACNA2D2	0.0263309	0.853566	Not sig
BAIAP3	-0.240258	0.0328067	Not sig
TSR3	-0.294459	8.20783e-06	Not sig
PIGQ	-0.360774	5.98155e-07	Not sig
CRAMP1	0.187036	0.00130301	Not sig
TEAD3	0.150384	0.0149067	Not sig
SELE	-1.37747	6.89385e-13	Down
DNAJC11	0.180942	0.0209976	Not sig
FMO3	-0.967598	1.58984e-09	Not sig
MYLIP	0.14393	0.133764	Not sig
NOX1	0.26202	0.0289424	Not sig
E2F2	1.31574	2.11021e-28	Up
PSMB1	-0.332849	1.80878e-05	Not sig
SYN1	-0.134238	0.464787	Not sig
JARID2	0.147025	0.0230336	Not sig
CDKL5	0.28106	0.00307443	Not sig
CAMK1G	-0.454196	0.0114217	Not sig
CDK11A	-0.150093	0.0870646	Not sig
NADK	-0.243667	0.000363294	Not sig
TFAP2B	1.16783	0.0268371	Up
TFAP2D	-0.0603706	0.952403	Not sig
DLEC1	-0.390662	0.00102141	Not sig
CYTH3	0.0342816	0.691607	Not sig
ADAM22	0.428987	0.0139478	Not sig
SYPL1	-0.036593	0.49438	Not sig
CYB561	0.121424	0.348509	Not sig
SPAG9	0.182285	0.00234979	Not sig
CELSR3	0.523924	0.00020031	Not sig
AASS	-0.208458	0.222117	Not sig
PLEKHG6	0.539975	0.000218853	Not sig
SS18L2	-0.219652	0.00153577	Not sig
MPND	-0.333482	2.70775e-05	Not sig
MGST1	-0.666968	7.63494e-09	Not sig
CRY1	0.298774	4.36823e-05	Not sig
PGLYRP1	-0.517201	0.00415977	Not sig
NFIX	-0.28106	0.00247883	Not sig
ST3GAL1	-0.31851	0.00934024	Not sig
MMP25	-0.088551	0.489953	Not sig
IL32	-0.847304	1.53817e-09	Not sig
PKD1	0.430577	1.15995e-05	Not sig
MAPK8IP2	0.50692	0.00528047	Not sig
MED24	0.211028	6.58656e-06	Not sig
RHOBTB2	0.200177	0.0239442	Not sig
HEATR5B	0.185665	0.00154163	Not sig
SEC62	-0.204063	8.38965e-05	Not sig
RPS20	-0.603539	3.67425e-09	Not sig
CSDE1	-0.0128494	0.798274	Not sig
UBE3C	0.101899	0.101885	Not sig
REV3L	0.0964455	0.208031	Not sig
TENM1	0.596439	0.018012	Not sig
PAX7	-0.804052	0.112913	Not sig
MASP2	-1.17331	2.48371e-13	Down
IYD	-0.42808	0.0134713	Not sig
FAM76A	-0.0631199	0.240986	Not sig
TRAF3IP3	0.159867	0.220019	Not sig
POMT2	0.135031	0.0191199	Not sig
VTA1	0.168291	0.00158821	Not sig
MLXIPL	-0.448727	3.3861e-05	Not sig
BAZ1B	0.280435	2.30763e-09	Not sig
RANBP9	0.0958832	0.162028	Not sig
ETV7	0.50369	0.00115559	Not sig
SPRTN	0.140853	0.00337347	Not sig
EEF1AKNMT	0.00852464	0.870874	Not sig
DYRK4	-0.219828	0.00345169	Not sig
ZNF207	0.241846	1.56641e-13	Not sig
UQCRC1	-0.482514	1.12591e-12	Not sig
STARD3NL	0.153059	0.0295264	Not sig
CD9	-0.00237226	0.982777	Not sig
HHATL	0.503641	0.036952	Not sig
NCAPD2	1.0737	2.17887e-47	Up
IFFO1	-0.093245	0.13378	Not sig
GIPR	1.44912	2.01451e-14	Up
PHF7	-0.0904482	0.252876	Not sig
SEMA3G	-0.26226	0.0241314	Not sig
NISCH	-0.0164181	0.717234	Not sig
STAB1	-0.239892	0.0171685	Not sig
FUZ	-0.0476359	0.679896	Not sig
SLC6A13	-1.41177	5.75138e-17	Down
IDS	-0.08783	0.391904	Not sig
PRSS3	0.925072	0.0019665	Not sig
ZNF200	-0.00443035	0.932683	Not sig
CD4	0.0235706	0.838704	Not sig
LRRC23	-0.19661	0.0292293	Not sig
BTK	0.204689	0.093653	Not sig
HFE	-0.0637053	0.455517	Not sig
SCMH1	0.3637	9.87841e-09	Not sig
FYN	-0.411917	5.46562e-06	Not sig
HIVEP2	0.0566502	0.450817	Not sig
FMO1	1.68419	7.15974e-13	Up
ELOA	-0.0592112	0.277211	Not sig
LYPLA2	-0.236854	0.000127553	Not sig
CLCN6	0.172389	0.0116365	Not sig
MRC2	0.198759	0.18921	Not sig
SLC6A7	-0.329711	0.192614	Not sig
TSPAN9	-0.341264	5.41187e-06	Not sig
BTBD7	0.212031	0.000215242	Not sig
APBA3	-0.107102	0.0429456	Not sig
MKS1	0.0227927	0.691325	Not sig
ABHD5	-0.0171976	0.796065	Not sig
ANOS1	0.115419	0.497362	Not sig
AKAP8L	0.14689	0.00304855	Not sig
MBTD1	0.172238	0.00499166	Not sig
UTP18	0.21153	8.19093e-05	Not sig
RNF216	0.149882	0.00158239	Not sig
TTC19	-0.254085	0.00028134	Not sig
PTBP1	0.153128	5.01892e-06	Not sig
DPF1	0.730805	2.65018e-06	Not sig
SYT7	0.115134	0.558216	Not sig
LARS2	0.148487	0.0112927	Not sig
PIK3C2A	0.186382	0.00386479	Not sig
PLAUR	0.551769	3.60966e-05	Not sig
ANLN	1.84672	1.46816e-61	Up
WIZ	0.0668239	0.204894	Not sig
RABGAP1	0.117348	0.0265193	Not sig
DCN	-0.713235	0.00085775	Not sig
QPCTL	-0.249961	0.00141809	Not sig
PPP5C	0.19616	0.00015059	Not sig
CEP68	-0.0142943	0.797702	Not sig
MAP4K3	0.321365	9.01841e-06	Not sig
ZBTB32	0.363431	0.00978877	Not sig
TYROBP	-0.0659091	0.574784	Not sig
TMEM159	0.296094	0.042688	Not sig
GABRA3	1.24689	0.00416579	Up
BRCA1	1.084	1.84713e-39	Up
ERCC1	-0.143847	0.0439443	Not sig
CD22	-0.13007	0.417691	Not sig
SEMA3B	0.265943	0.142528	Not sig
MBTPS2	-0.00807417	0.894384	Not sig
PRICKLE3	0.095814	0.0682328	Not sig
LTF	-0.289289	0.107201	Not sig
EXTL3	0.16911	0.0327105	Not sig
NR1H4	-0.254859	0.00150925	Not sig
ELOVL5	-0.107896	0.190289	Not sig
ALOX5	0.598469	0.000551573	Not sig
KDM5D	0.0357667	0.902623	Not sig
CALCOCO1	-0.128958	0.0327522	Not sig
UBR7	0.208101	8.13082e-06	Not sig
MAP4K5	0.273971	5.848e-06	Not sig
EHD3	-0.0485948	0.670554	Not sig
PSMC4	-0.071532	0.232178	Not sig
MAN2B2	-0.152409	0.0261296	Not sig
SLC7A14	-0.890025	0.000694923	Not sig
CLDN11	0.405631	0.0250656	Not sig
SLC25A39	-0.0474207	0.445662	Not sig
MVP	-0.149886	0.100844	Not sig
NUB1	-0.147769	0.00226328	Not sig
PGM3	0.17389	0.0150984	Not sig
RWDD2A	-0.0940037	0.11403	Not sig
CLK1	0.0604782	0.413321	Not sig
POLR3B	0.0851914	0.0980234	Not sig
ANGEL1	0.194315	0.0147299	Not sig
RNF14	-0.185096	0.000258497	Not sig
DNASE1L1	0.0165872	0.835337	Not sig
DDX11	0.710853	9.08574e-14	Not sig
HEBP1	-0.425457	1.65391e-10	Not sig
GPRC5A	0.750286	0.000315933	Not sig
MAMLD1	0.586867	6.40358e-05	Not sig
CD6	-0.0175753	0.906601	Not sig
TACC3	0.895355	5.85215e-19	Not sig
UFL1	-0.0449654	0.518394	Not sig
POLA2	0.0435824	0.680318	Not sig
ZC3H3	0.0238812	0.750019	Not sig
CAPN1	0.237373	3.81406e-05	Not sig
ACP3	0.815556	0.000442417	Not sig
MDH1	-0.135339	0.035947	Not sig
SLC30A9	0.0290676	0.602852	Not sig
MTMR11	-0.170037	0.248962	Not sig
COX15	-0.25343	4.53023e-08	Not sig
CCDC88C	0.499796	1.53152e-05	Not sig
YAF2	-0.138478	0.00414692	Not sig
ZMYND11	0.00104935	0.984503	Not sig
WAS	-0.0443792	0.656146	Not sig
DPEP1	-0.00256537	0.992144	Not sig
BID	-0.0570265	0.464633	Not sig
MATR3	0.19918	0.0946084	Not sig
NPC1L1	-0.377614	0.115824	Not sig
XYLT2	0.0328366	0.565822	Not sig
RGPD5	0.171256	0.473985	Not sig
STMN4	-0.520546	0.0553474	Not sig
NUDCD3	-0.179413	6.91873e-05	Not sig
ISL1	1.45956	0.00175884	Up
CHDH	-0.323222	0.000132162	Not sig
IL20RA	2.04279	8.43853e-09	Up
CLCA1	3.20943	0.00190366	Up
CLCA4	-0.406305	0.416583	Not sig
GLT8D1	-0.343474	4.15704e-07	Not sig
ATP2C1	0.223508	8.0479e-06	Not sig
IGF1	-0.803338	8.25424e-06	Not sig
SLC38A5	0.176445	0.262287	Not sig
RALBP1	0.109619	0.0585864	Not sig
RUFY3	-0.0154865	0.790458	Not sig
CNTN1	0.313776	0.409067	Not sig
SLC11A1	0.21516	0.123302	Not sig
WWTR1	0.257357	0.0108902	Not sig
AGPS	0.156178	0.0055339	Not sig
ZNF806	0.487473	0.177929	Not sig
CXorf56	-0.0978769	0.0739782	Not sig
ATP1A2	-0.274608	0.150723	Not sig
TTC27	0.078853	0.0859823	Not sig
ZNF582	-0.311826	0.0116081	Not sig
VSIG2	-0.0826642	0.706408	Not sig
PHLDB1	0.347454	0.00612521	Not sig
MARCO	-0.807159	0.00135359	Not sig
CYP24A1	1.94657	1.24766e-06	Up
PRDM11	0.29206	0.00083842	Not sig
SYT13	0.892201	0.00564536	Not sig
SNAI2	-0.191946	0.217058	Not sig
CD74	-0.0524049	0.692001	Not sig
HGF	0.233501	0.23025	Not sig
ZRANB1	-0.0280703	0.793884	Not sig
NCDN	0.255895	0.00041624	Not sig
ADGRA2	0.0303707	0.840728	Not sig
CCT8L1P	-0.287771	0.428042	Not sig
ZFP64	0.248625	6.23047e-08	Not sig
MNAT1	-0.0344347	0.532307	Not sig
SAMD4A	-0.437646	3.55346e-07	Not sig
RUNX3	0.102431	0.428628	Not sig
MRE11	0.421175	1.31582e-17	Not sig
PLEKHB1	2.31618	1.33338e-22	Up
SERPINB1	-0.0869161	0.250288	Not sig
CYP3A43	-0.779037	0.000281012	Not sig
SLC7A9	-0.161451	0.188343	Not sig
SPAST	0.101166	0.0274818	Not sig
NRXN3	-0.410021	0.0722604	Not sig
OSBPL5	0.183356	0.116663	Not sig
AQR	0.204792	4.38389e-06	Not sig
CPS1	-0.415744	0.0464275	Not sig
C8B	-0.747329	2.58247e-08	Not sig
FHL1	-0.409162	0.00105266	Not sig
RTF2	-0.0127687	0.773843	Not sig
GABRA1	-0.181179	0.726849	Not sig
NLRP2	1.89382	3.37036e-16	Up
SLC45A4	0.587685	0.000365821	Not sig
RNF10	-0.0731526	0.0570309	Not sig
ZNF839	-0.0201585	0.785334	Not sig
ZDHHC6	0.0479146	0.329085	Not sig
GRAMD1B	0.524046	0.00736083	Not sig
RNH1	-0.199567	0.000332621	Not sig
NDUFS1	-0.215831	0.000145554	Not sig
RB1CC1	-0.17827	0.0228037	Not sig
ERP44	-0.260102	6.38958e-07	Not sig
ALAS1	-0.881448	5.11823e-14	Not sig
BIRC3	0.59828	0.00019155	Not sig
AKAP11	-0.0937166	0.20228	Not sig
GLRX2	-0.226804	0.000142789	Not sig
SNAPC1	0.0534724	0.430494	Not sig
DERA	-0.232858	0.000884583	Not sig
STRAP	0.0234703	0.610058	Not sig
ABCC2	-0.35113	0.00519055	Not sig
DEF6	0.12294	0.295868	Not sig
PLEKHO1	-0.0891922	0.424476	Not sig
GCLM	0.167971	0.104269	Not sig
UBR2	-0.0640389	0.222904	Not sig
EHD2	-0.380004	0.000551445	Not sig
DEPDC1	1.78774	2.78954e-49	Up
CCDC28A	-0.443126	5.07423e-11	Not sig
RRAGD	0.171248	0.114832	Not sig
HSF2	0.418119	2.69817e-11	Not sig
PHF20	0.162724	4.91028e-05	Not sig
HSD17B6	-0.894604	1.92211e-08	Not sig
NR1H3	-0.326599	4.84123e-07	Not sig
TYMP	-0.339147	0.00456843	Not sig
NCAPH2	0.163547	0.0198013	Not sig
TOMM34	0.082068	0.169844	Not sig
SEC63	-0.096987	0.0745241	Not sig
KPNA6	0.125638	0.0251679	Not sig
VIM	-0.18906	0.0594229	Not sig
RTEL1-TNFRSF6B	0.36586	0.00247752	Not sig
FAS	-0.56922	1.44337e-06	Not sig
RNASET2	-0.17813	0.116473	Not sig
CD44	0.00820141	0.960035	Not sig
KCNG1	0.429952	0.0934664	Not sig
AGPAT4	0.670091	1.62539e-06	Not sig
SLAMF7	0.292511	0.0958635	Not sig
BTN3A1	-0.0957103	0.299129	Not sig
MIPEP	-0.227989	0.0017257	Not sig
PRKCH	-0.24116	0.00786947	Not sig
INSRR	0.754524	0.00287278	Not sig
IFNGR1	-0.705398	1.96466e-12	Not sig
B4GALT7	-0.262562	6.37677e-05	Not sig
SH2D2A	0.0493234	0.738693	Not sig
VRK2	0.532015	3.72045e-10	Not sig
TNFRSF1B	-0.207052	0.0313836	Not sig
VEZT	0.401385	2.1514e-12	Not sig
POU2F2	0.107714	0.402036	Not sig
BRD9	0.191119	0.000705693	Not sig
SNX1	0.0142004	0.780807	Not sig
TBPL1	0.0949316	0.157836	Not sig
ARNTL2	0.63939	2.64591e-06	Not sig
BCLAF1	0.0663193	0.113363	Not sig
SLC39A9	-0.150645	0.00531597	Not sig
ANK1	0.514918	0.00395044	Not sig
IBSP	1.19946	0.00012191	Up
TFB1M	-0.317221	1.70638e-05	Not sig
RABEP1	0.000635205	0.99326	Not sig
HMGB3	-0.194536	0.104938	Not sig
NUP160	0.344773	2.45234e-09	Not sig
BAK1	0.483357	9.83922e-09	Not sig
MUSK	-0.423362	0.180411	Not sig
IKZF2	0.174308	0.142722	Not sig
GRN	0.15696	0.0137029	Not sig
FAM13B	0.2022	0.00110973	Not sig
ARHGAP31	-0.142131	0.157607	Not sig
CENPQ	0.706768	7.1029e-20	Not sig
SARS1	-0.176129	0.00551892	Not sig
RANBP3	0.0067528	0.875379	Not sig
ARID4A	-0.0107046	0.883676	Not sig
EIPR1	0.177899	0.00192515	Not sig
PNPLA6	-0.227142	7.2872e-05	Not sig
IFT88	-0.128134	0.0646096	Not sig
ALG1	-0.164569	0.00378131	Not sig
ZCCHC8	0.258919	4.47955e-07	Not sig
ABCF2	-0.127724	0.0826763	Not sig
CHPF2	0.187835	0.00133813	Not sig
LRRC7	0.442917	0.000517515	Not sig
FUT8	0.454674	0.000144199	Not sig
UBA6	0.187812	0.00149499	Not sig
GAB2	0.0139466	0.869144	Not sig
ATP6V0A1	-0.502102	1.0974e-14	Not sig
PIAS1	0.197801	0.000638538	Not sig
SLC4A7	0.431526	5.66772e-05	Not sig
APBA2	0.732592	7.44355e-05	Not sig
MAP2K3	-0.332064	5.97175e-06	Not sig
EFCAB1	-0.78899	0.000331048	Not sig
TMSB10	-0.0300138	0.825924	Not sig
ASTE1	0.0976745	0.0267843	Not sig
RNF19A	0.20188	0.0119935	Not sig
PEX3	-0.192307	0.0129267	Not sig
GABARAPL2	-0.364768	8.96125e-14	Not sig
MYOC	-1.45896	1.77924e-05	Down
SH3YL1	0.591232	0.000173708	Not sig
FAM136A	0.156223	0.0133069	Not sig
VCL	0.267985	0.000550713	Not sig
DEPDC1B	1.93482	6.74518e-45	Up
DAPK2	-0.204483	0.0881716	Not sig
NSMAF	0.222334	0.00394472	Not sig
ADSS2	0.186233	0.00250317	Not sig
STAP1	-0.185934	0.311817	Not sig
TIMP2	0.0629702	0.663763	Not sig
RFC1	0.178363	0.00229005	Not sig
TBC1D23	0.0436515	0.415389	Not sig
CUL3	0.240749	0.000472837	Not sig
MYOM2	-0.716633	4.2474e-05	Not sig
OTC	-0.751557	3.37924e-05	Not sig
CYP46A1	-0.624866	3.04776e-07	Not sig
ZZZ3	0.116319	0.0181469	Not sig
SLC18A1	0.158846	0.518601	Not sig
USP2	-0.394446	0.00408596	Not sig
CASR	0.944726	0.00140885	Not sig
TUBG2	0.286268	2.60695e-05	Not sig
RPL26L1	-0.317569	6.89391e-07	Not sig
FLT4	-0.500244	7.81863e-08	Not sig
NSUN2	0.0145416	0.750028	Not sig
FBXO42	0.0121519	0.798188	Not sig
MFAP3	0.293395	0.0023836	Not sig
MRI1	-0.0122588	0.854231	Not sig
METTL1	-0.0225537	0.751875	Not sig
HOXC8	-0.0244577	0.949585	Not sig
AGA	-0.0671485	0.470996	Not sig
PI4K2B	-0.172429	0.0308942	Not sig
BOD1L1	0.245399	0.00171542	Not sig
MAT2B	-0.169811	0.00598872	Not sig
TLL1	-0.20363	0.238776	Not sig
EDC4	0.283296	0.000855215	Not sig
TRIO	0.311881	9.36242e-06	Not sig
VCAN	0.275346	0.201773	Not sig
CLEC16A	-0.0343475	0.572399	Not sig
MSR1	0.241905	0.0423141	Not sig
CDH1	0.135637	0.276377	Not sig
MTREX	0.166611	0.00085762	Not sig
DNAH5	-0.387065	0.0407343	Not sig
ZFYVE16	0.353112	5.01248e-06	Not sig
RIPOR1	-0.0585948	0.339815	Not sig
C6	-1.26377	2.72616e-15	Down
RAI14	0.286549	6.596e-05	Not sig
SOX30	-0.245144	0.195364	Not sig
PNKP	0.0134009	0.828257	Not sig
BEST2	0.507787	0.0541677	Not sig
PHLPP2	0.0454953	0.579056	Not sig
SPDL1	0.938913	3.25016e-42	Not sig
STAU2	-0.128098	0.0362769	Not sig
SLC66A1	0.0198281	0.787929	Not sig
CTNS	-0.21599	0.000118138	Not sig
RTN4R	0.0657862	0.620915	Not sig
PHF23	-0.231132	0.000105217	Not sig
CDH10	2.80879	7.55719e-09	Up
INPP4A	0.284423	3.35797e-06	Not sig
RAB27B	1.21073	6.35118e-10	Up
PSMA4	-0.126497	0.0160802	Not sig
MYO16	-0.640646	1.68086e-05	Not sig
LSG1	0.141597	0.000159219	Not sig
PARP3	0.0201831	0.773056	Not sig
TNC	0.503038	0.00269447	Not sig
THAP3	-0.244598	0.000406297	Not sig
RIPOR3	-0.673487	1.62084e-05	Not sig
TDP1	0.322929	1.31957e-09	Not sig
AIFM2	-0.197038	0.0215857	Not sig
C2orf83	-0.091074	0.811143	Not sig
SPATA7	-0.197484	0.00314193	Not sig
MED17	0.0747903	0.136264	Not sig
RETSAT	-0.300581	0.000444217	Not sig
CAPG	0.465922	0.00131198	Not sig
AP2S1	-0.33451	1.04795e-05	Not sig
USH2A	0.199307	0.305362	Not sig
ZPBP	-0.268043	0.629727	Not sig
TG	-1.83066	8.25361e-20	Down
ADAM28	0.892915	4.81004e-07	Not sig
BARX2	1.2457	2.10659e-06	Up
DCUN1D1	-0.0460281	0.414229	Not sig
JADE2	0.198691	0.00583867	Not sig
ZIC2	0.948191	3.34697e-06	Not sig
LCP2	0.141734	0.19516	Not sig
TRIT1	0.0856439	0.0951054	Not sig
ADRB1	-1.60779	3.42953e-16	Down
GUCA2B	-0.637167	0.00745675	Not sig
CUL7	0.107934	0.102766	Not sig
CTNNA1	-0.0139291	0.764447	Not sig
PHKA2	0.250497	0.000575376	Not sig
CNTLN	0.202613	0.019989	Not sig
EPHA3	-0.261488	0.163993	Not sig
HSPA5	-0.0705225	0.299496	Not sig
DSG2	1.31152	1.17268e-19	Up
GEMIN8	-0.0713783	0.191255	Not sig
OFD1	0.269126	2.53923e-06	Not sig
GPM6B	0.321673	0.00615846	Not sig
MAGEC2	0.814347	0.0603503	Not sig
PREX2	-0.38022	0.00967675	Not sig
WDR37	-0.0289075	0.578849	Not sig
YTHDC2	0.0222838	0.71445	Not sig
CTPS2	0.0732011	0.225618	Not sig
ATP6V1H	-0.282046	4.01342e-05	Not sig
POLR2B	0.325545	1.05956e-05	Not sig
FAM214A	-0.110119	0.141126	Not sig
ARAP2	0.492848	7.77968e-07	Not sig
TPR	0.417077	8.33683e-10	Not sig
CP	-0.0158194	0.915291	Not sig
KATNIP	0.182305	0.00899306	Not sig
DTNBP1	0.0790656	0.33005	Not sig
XK	0.114465	0.55869	Not sig
ANO2	-1.03397	2.71808e-07	Down
C12orf4	0.134001	0.00335127	Not sig
SCML1	0.0875966	0.297651	Not sig
WWC3	0.0651462	0.407122	Not sig
ARHGAP6	-0.299859	0.00596472	Not sig
FAM184B	-0.00320596	0.974396	Not sig
MAP4	0.0453315	0.353532	Not sig
GOPC	0.0277855	0.603457	Not sig
ROS1	-0.0661412	0.812153	Not sig
USP28	0.233301	2.65754e-05	Not sig
HDAC9	0.550787	8.37604e-05	Not sig
TSPAN17	-0.0963471	0.114484	Not sig
NOP16	-0.422637	3.74879e-06	Not sig
CC2D2A	0.265771	0.0028284	Not sig
RRM2B	-0.199111	0.00580052	Not sig
ZNF800	0.0011422	0.983089	Not sig
TNFRSF17	0.404551	0.13386	Not sig
SNX29	0.290729	0.000313014	Not sig
LMO3	0.468441	0.0021863	Not sig
MRPS10	-0.114921	0.0186563	Not sig
GUCA1A	-0.644672	0.0405695	Not sig
RSF1	0.0835283	0.110112	Not sig
VPS13D	-0.0501338	0.407514	Not sig
CELF2	0.0106711	0.936321	Not sig
FAM120A	-0.125321	0.00208082	Not sig
R3HDM1	0.290223	1.83652e-09	Not sig
COL9A2	1.4441	8.54506e-17	Up
KITLG	0.620266	2.81883e-07	Not sig
ERCC8	0.00372944	0.938567	Not sig
ADAMTS6	0.785717	1.32402e-07	Not sig
H6PD	-0.289177	0.00194875	Not sig
VAMP3	-0.100216	0.0931368	Not sig
PER3	0.214498	0.0444493	Not sig
UTS2	0.861943	0.000843566	Not sig
TNFRSF9	0.0889278	0.647806	Not sig
EPN3	1.70247	3.00835e-16	Up
LTBP1	0.399859	0.00340309	Not sig
RCN1	-0.584382	1.27641e-06	Not sig
ELN	-0.89234	1.35542e-06	Not sig
RFC2	0.226657	0.000524073	Not sig
ARID1B	0.188233	0.00140349	Not sig
CLPTM1L	-0.156296	0.0125337	Not sig
NEDD4L	0.0654291	0.446264	Not sig
FOXP3	-0.0182795	0.920261	Not sig
PPP1R3F	-0.47256	1.59436e-05	Not sig
HEXB	-0.174897	0.00777966	Not sig
PTCD2	-0.115955	0.0320932	Not sig
NEXMIF	-0.299686	0.287529	Not sig
JKAMP	-0.14654	0.0042041	Not sig
DKK3	-1.07905	2.23354e-10	Down
ARHGEF5	0.215938	0.0323183	Not sig
NFE2L3	0.917487	3.37884e-12	Not sig
MCUR1	-0.300545	2.45298e-05	Not sig
LIMA1	0.313885	0.000116689	Not sig
LETMD1	-0.137029	0.00728779	Not sig
SLC4A8	0.530906	6.54049e-05	Not sig
LAMC3	-0.546276	0.00108382	Not sig
PTGER3	-0.516789	0.00149036	Not sig
TNIP3	0.962558	6.70226e-06	Not sig
MAPK9	0.102852	0.0386283	Not sig
COL23A1	-1.28492	4.25553e-15	Down
BCAR1	0.0232674	0.736327	Not sig
FAM160A2	-0.0651604	0.245131	Not sig
HERPUD1	-0.494517	1.44926e-12	Not sig
HOMER3	0.528954	2.03315e-05	Not sig
RAD51	1.23818	7.99287e-33	Up
POLQ	1.73059	6.99352e-59	Up
PIK3CB	0.196836	0.000163752	Not sig
CYBA	0.309432	0.0674641	Not sig
THOC3	0.113349	0.0689892	Not sig
HEBP2	-0.327838	2.97164e-05	Not sig
MPHOSPH9	0.347786	1.38939e-06	Not sig
PLEKHA5	0.129546	0.0806313	Not sig
PRSS8	0.656365	0.0174432	Not sig
SIKE1	0.0835839	0.0875565	Not sig
RRP12	0.027451	0.72887	Not sig
FNIP2	0.103126	0.389593	Not sig
MSMO1	-0.631424	4.05977e-09	Not sig
TTC17	-0.0392403	0.486032	Not sig
ALX4	0.955043	0.000131286	Not sig
FSTL4	-0.148359	0.491039	Not sig
FOXN3	-0.111808	0.139991	Not sig
METTL24	1.10687	2.73591e-08	Up
AKR7A2	-0.385803	4.64112e-08	Not sig
MRTO4	-0.00351576	0.959322	Not sig
NNAT	0.385741	0.0179498	Not sig
USE1	-0.510488	4.18802e-10	Not sig
MCF2L2	1.26901	2.14197e-09	Up
NRIP2	-0.184866	0.0506518	Not sig
LAMA3	-0.518038	0.00467244	Not sig
AP5M1	-0.106674	0.0910896	Not sig
ANAPC4	0.12129	0.0138547	Not sig
KCNQ1	0.397563	0.00664358	Not sig
TRAPPC3	-0.142411	0.00299754	Not sig
THRAP3	0.101907	0.00499761	Not sig
PHPT1	-0.154415	0.0992688	Not sig
ENTPD2	0.660424	2.07173e-05	Not sig
LY75	0.178479	0.158628	Not sig
ARID4B	0.0435062	0.494509	Not sig
OPN3	-0.154202	0.188836	Not sig
SDCCAG8	0.0630616	0.232822	Not sig
PTPRN	0.241859	0.227244	Not sig
HHAT	-0.062881	0.55581	Not sig
KIF1B	0.0459914	0.504635	Not sig
FOXC1	-0.297863	0.0670904	Not sig
TBC1D22A	-0.168325	0.0038135	Not sig
SYNE2	0.0911521	0.324749	Not sig
PLEKHH1	0.577277	1.0474e-07	Not sig
ATP9A	0.182698	0.0650468	Not sig
SPO11	-0.0604034	0.968156	Not sig
CBLN4	-2.90926	5.34138e-23	Down
CHRDL2	-0.450613	0.0100902	Not sig
FAM168A	0.124317	0.0248817	Not sig
RELT	0.594974	7.28152e-10	Not sig
GALC	0.143024	0.232268	Not sig
NOP58	0.288938	1.08181e-07	Not sig
SZRD1	0.00026041	0.995941	Not sig
KCNH2	1.01604	0.00014605	Up
CUL1	-0.0903767	0.072513	Not sig
FAM114A2	-0.169027	0.000367491	Not sig
CYFIP2	-0.472037	0.00200882	Not sig
TAB2	-0.0332589	0.654696	Not sig
GINM1	-0.27012	3.22369e-07	Not sig
EIF2AK2	0.127709	0.0271189	Not sig
USP36	0.101554	0.0586878	Not sig
KMT2C	0.173631	0.013713	Not sig
MCOLN3	2.05866	1.85824e-13	Up
CCDC85A	-0.0738019	0.682611	Not sig
PUM2	0.132594	0.00136402	Not sig
MRPL43	-0.348135	4.26068e-09	Not sig
ITIH4	-1.21964	1.92321e-18	Down
ITIH1	-0.662724	5.5089e-07	Not sig
HPF1	-0.0333415	0.554796	Not sig
ZFR	0.190413	4.09555e-05	Not sig
ZNF280C	0.139876	0.0659151	Not sig
NPFFR2	0.595285	0.115642	Not sig
PHF21B	1.12068	0.00130137	Up
TRAF1	0.11832	0.132226	Not sig
RC3H2	-0.0159542	0.749266	Not sig
IL17RB	0.204019	0.0873598	Not sig
TRAF3IP2	-0.114635	0.196163	Not sig
GYG2	-0.461724	0.000238617	Not sig
DCBLD2	0.268805	6.3469e-05	Not sig
SERPINB3	1.62667	0.00727821	Up
SOAT1	0.36863	7.71806e-09	Not sig
PKP2	-0.0998233	0.367298	Not sig
MSH4	0.56964	0.00357427	Not sig
F7	-0.396045	0.00129181	Not sig
GDI2	-0.152604	0.000450466	Not sig
PRDM1	-0.0580077	0.602504	Not sig
ATG5	-0.130106	0.00676268	Not sig
TMCC3	0.271909	0.00328712	Not sig
PITHD1	-0.150498	0.00783759	Not sig
MTA3	0.352008	8.49845e-10	Not sig
USP13	0.220441	0.00146323	Not sig
ATP11B	0.400892	1.01664e-07	Not sig
LAMC2	1.80037	1.49258e-13	Up
CDK14	0.148602	0.09927	Not sig
SEC61A1	0.0635103	0.24641	Not sig
PPP1R12A	0.349986	2.29367e-10	Not sig
RASGRF1	-1.88667	6.24248e-16	Down
CAMK2B	-0.996238	2.4369e-05	Not sig
CROCC	0.191269	0.0128572	Not sig
POLR3E	-0.0188505	0.682319	Not sig
ATP2B4	-0.248377	0.0192713	Not sig
ZC3H11A	0.387151	0.00456876	Not sig
RIOK2	-0.148861	0.00102022	Not sig
YIPF1	-0.264388	4.80932e-07	Not sig
NDC1	0.516604	2.3836e-20	Not sig
DGKG	0.133801	0.36309	Not sig
FLYWCH1	-0.118388	0.0494917	Not sig
UNKL	0.111643	0.212248	Not sig
TBXAS1	-0.0208203	0.847032	Not sig
PARP12	-0.0956088	0.202297	Not sig
ALDH18A1	0.218366	0.00337915	Not sig
TARBP1	0.353607	1.86967e-05	Not sig
GATB	-0.385452	2.19402e-08	Not sig
MXD1	0.528521	9.45173e-10	Not sig
CDK17	0.162903	0.00458797	Not sig
DNAJC25	-0.377389	8.40802e-06	Not sig
SLC2A3	0.167815	0.22085	Not sig
PSD	-0.214851	0.0845049	Not sig
CTDP1	-0.00272187	0.952937	Not sig
YBX3	0.104546	0.449299	Not sig
STYK1	1.29479	1.71188e-09	Up
WNK1	0.38596	1.75397e-10	Not sig
RPS17P5	0.0343276	0.886399	Not sig
CCAR1	0.246189	2.48465e-07	Not sig
OGFR	-0.0356223	0.582287	Not sig
GNA15	0.0440932	0.712171	Not sig
CREB3L3	-0.350412	0.0117256	Not sig
PIGV	-0.406903	5.61004e-08	Not sig
PTPRU	-0.194851	0.145077	Not sig
SNRNP40	0.210335	7.27008e-05	Not sig
RIMBP2	-2.19731	9.16636e-09	Down
COL11A1	1.32759	3.12427e-06	Up
QSER1	0.527532	2.05059e-21	Not sig
MPC1	-0.505319	1.76231e-07	Not sig
ACAA1	-0.651152	3.88035e-11	Not sig
BCAT1	0.684155	6.31935e-08	Not sig
HDAC7	0.222547	0.0106398	Not sig
LZTS1	0.0371528	0.752701	Not sig
PRDM6	-0.413657	0.00578871	Not sig
WNT8A	-0.15393	0.853424	Not sig
SPAG4	-0.0219412	0.874409	Not sig
NCKAP1	0.292682	4.57468e-07	Not sig
MRPS35	-0.0696869	0.153061	Not sig
GUCY1B1	0.306398	0.00693512	Not sig
SFSWAP	0.245477	2.57951e-08	Not sig
TNK2	-0.0801846	0.278274	Not sig
MON2	0.17855	0.00102368	Not sig
CDH3	0.16379	0.429553	Not sig
ARSF	-0.815751	0.0133342	Not sig
GPBP1	0.0197892	0.595005	Not sig
DGAT2	-0.114985	0.391778	Not sig
ZNF112	0.538542	4.44815e-08	Not sig
CS	0.14067	0.0256388	Not sig
LTK	0.161856	0.358872	Not sig
MRPS24	0.0415354	0.719596	Not sig
ELMO2	0.177072	0.000204045	Not sig
WAPL	0.154802	0.000444757	Not sig
VMP1	-0.0312855	0.609117	Not sig
APPBP2	0.12242	0.0231685	Not sig
POLD1	0.789771	7.29207e-31	Not sig
SEZ6	1.8834	1.54755e-09	Up
EIF4B	0.0423779	0.470139	Not sig
SLC6A16	-0.403709	0.000820993	Not sig
BICRA	0.0949294	0.0599564	Not sig
SPHK2	0.178046	0.0444959	Not sig
RPL18	-0.356214	0.000164353	Not sig
CA11	0.0805553	0.559287	Not sig
ISOC2	-0.779609	6.20495e-19	Not sig
U2AF2	0.214557	5.69734e-08	Not sig
EPN1	-0.354332	7.88309e-10	Not sig
MED29	-0.0833015	0.0706737	Not sig
AHRR	-0.866901	0.000315012	Not sig
GSC2	-0.371289	0.32471	Not sig
ZNF275	-0.132057	0.118624	Not sig
MTMR1	0.164083	0.00682154	Not sig
GPC1	-0.119913	0.371395	Not sig
ADCK1	-0.325372	3.69526e-08	Not sig
HAGH	-0.710486	9.2462e-13	Not sig
RNF4	0.162981	0.000750653	Not sig
CASP8	0.298283	2.57411e-07	Not sig
LIMCH1	0.24606	0.0972093	Not sig
INTS13	0.243039	2.39839e-05	Not sig
TM7SF3	-0.145456	0.0764598	Not sig
DLX3	0.781671	0.0258531	Not sig
SPA17	0.401801	0.000149208	Not sig
TSPAN32	-0.0630906	0.623583	Not sig
CCN5	-0.743096	0.0012571	Not sig
DMRT3	0.978639	0.0276671	Not sig
ST3GAL6	-0.661541	2.14134e-08	Not sig
ATP2C2	1.32604	5.37087e-08	Up
NGFR	-0.633336	0.000444887	Not sig
CDON	0.164713	0.18091	Not sig
TAF2	0.24289	0.00263427	Not sig
HIPK2	-0.0821686	0.372974	Not sig
TNPO3	0.113218	0.0141587	Not sig
BORCS8-MEF2B	0.352212	0.189769	Not sig
RFXANK	0.0713391	0.321472	Not sig
TMEM161A	-0.335317	5.63201e-07	Not sig
LPAR2	0.857326	5.79888e-08	Not sig
CTSA	-0.00207154	0.978068	Not sig
SUGP2	0.379732	2.66836e-12	Not sig
SLC12A2	0.561286	7.60282e-05	Not sig
SNX24	-0.0147646	0.800047	Not sig
EYA2	0.0927197	0.652205	Not sig
CNN2	0.238618	0.00784063	Not sig
ABCA7	0.154066	0.142785	Not sig
SNCAIP	0.187071	0.288305	Not sig
DDX20	0.23833	1.03038e-07	Not sig
BTBD1	-0.0140684	0.779634	Not sig
FAR2	0.806385	6.88392e-12	Not sig
BCAS1	0.786311	0.000937074	Not sig
POU1F1	-0.055036	0.747224	Not sig
CHI3L2	0.368236	0.0651002	Not sig
SBNO2	0.0984103	0.11292	Not sig
PMS1	0.231445	4.64067e-07	Not sig
HMG20B	-0.163614	0.00358073	Not sig
CALCRL	-0.294668	0.0148928	Not sig
TAF11	0.00429509	0.937314	Not sig
ANKS1A	0.125556	0.0444681	Not sig
AP3D1	0.0947052	0.0875385	Not sig
ZNF76	-0.0852003	0.100615	Not sig
SLC9A3R2	-0.774973	1.26062e-16	Not sig
NTHL1	-0.575492	4.08095e-09	Not sig
UHRF1BP1	0.459056	1.07622e-11	Not sig
GNAI3	0.112027	0.00963014	Not sig
IPO5	0.34668	3.17112e-07	Not sig
OAT	-0.775317	0.000263965	Not sig
WDR3	0.206461	0.0033025	Not sig
PKN2	0.177382	0.00369232	Not sig
WDR18	-0.164318	0.015707	Not sig
TRAM2	-0.0503274	0.470349	Not sig
NTN1	-0.106754	0.449604	Not sig
GLP2R	0.106777	0.674869	Not sig
MCM10	1.66283	3.62027e-44	Up
DGKA	0.391969	0.000550884	Not sig
ERBB3	0.133367	0.107262	Not sig
ROPN1	0.549614	0.0761886	Not sig
ANKRD44	0.0546068	0.499226	Not sig
KARS1	-0.223917	8.78127e-05	Not sig
ADAT1	-0.0624106	0.292234	Not sig
PDIA5	-0.148523	0.0429762	Not sig
TBC1D22B	0.2977	1.1774e-06	Not sig
NDUFB4	-0.13179	0.0135258	Not sig
SPEN	0.278349	1.85014e-05	Not sig
MYLK	-0.31988	0.00748377	Not sig
ZC3H15	0.0605247	0.147023	Not sig
MAP2K4	-0.128622	0.0205505	Not sig
PACC1	0.344572	1.84616e-07	Not sig
SNAP91	1.88098	1.27601e-06	Up
SLK	0.0847688	0.126044	Not sig
CYB5R4	0.079977	0.197963	Not sig
COL17A1	-0.20302	0.254435	Not sig
GSTO2	0.148457	0.334554	Not sig
SEC61A2	0.0279743	0.706351	Not sig
PRKCQ	0.255243	0.0850787	Not sig
TLE2	-0.11932	0.299839	Not sig
ASB1	0.0758131	0.261096	Not sig
FAM107B	-0.16778	0.0158378	Not sig
ME1	0.245006	0.138898	Not sig
TBC1D1	0.182105	0.0151393	Not sig
CDK13	0.110013	0.0201839	Not sig
MTHFD2	0.285105	0.0213568	Not sig
SLC9A7	0.253308	0.00412015	Not sig
FOXJ2	0.0223645	0.704708	Not sig
YBX1	0.0947819	0.120641	Not sig
PDE4A	0.48038	0.000268795	Not sig
PPP2R5A	-0.0972532	0.146721	Not sig
CTNNA2	-1.85468	8.48439e-07	Down
ELAVL1	0.0208988	0.607623	Not sig
TIE1	-0.531674	2.50699e-08	Not sig
DIP2B	0.426981	8.00555e-17	Not sig
SMARCD1	0.47854	6.72613e-26	Not sig
KDM4A	0.0725724	0.162942	Not sig
NFYC	0.0333207	0.469762	Not sig
ZMYND12	-0.871912	2.34542e-10	Not sig
SLC9A3	-0.553738	0.0127159	Not sig
NGEF	-0.247433	0.00158692	Not sig
ASPM	1.49031	5.50356e-39	Up
CD84	0.275896	0.0339086	Not sig
ELOVL1	0.120048	0.0255538	Not sig
SPI1	0.229826	0.0430643	Not sig
POLR1H	-0.337096	9.75516e-05	Not sig
MPPED2	-0.676564	3.62958e-05	Not sig
CLDN18	2.19339	8.13068e-19	Up
ZBTB11	0.256282	2.37987e-08	Not sig
ATXN3	-0.199451	0.000139055	Not sig
GOLGA5	-0.105677	0.0398934	Not sig
FGFR2	0.584949	0.00787762	Not sig
LRRC40	0.123993	0.0809308	Not sig
ISOC1	-0.1503	0.0401989	Not sig
EML1	0.0682437	0.514505	Not sig
TRMT11	0.0486056	0.52117	Not sig
THUMPD1	0.0740535	0.145197	Not sig
MSANTD3	0.23948	0.000365478	Not sig
KIF26A	-0.158975	0.265993	Not sig
ATG2B	0.0581852	0.393571	Not sig
ARFGEF1	0.0408891	0.505207	Not sig
ACSM2B	-0.994776	1.0834e-10	Not sig
ZFAT	0.145458	0.0175096	Not sig
MTFR1	-0.304811	4.98385e-05	Not sig
STAG3	-0.422196	0.000847213	Not sig
FECH	-0.230892	0.000686661	Not sig
MYO9A	0.047576	0.64105	Not sig
DDX3Y	0.0921216	0.750926	Not sig
PFKP	0.45516	0.0101817	Not sig
IDI1	-0.254118	0.00640667	Not sig
SP100	-0.250009	1.68807e-05	Not sig
KLF6	-0.222165	0.0238739	Not sig
PLPP1	-0.51953	5.86875e-07	Not sig
NEO1	0.446052	6.8825e-08	Not sig
TRAM1	-0.11784	0.0993337	Not sig
PHKA1	0.235681	0.0882788	Not sig
TNFRSF1A	-0.300743	5.68703e-08	Not sig
CACNB1	0.685586	3.27483e-10	Not sig
EVI5	0.0328349	0.607781	Not sig
STOML1	-0.218548	0.00128814	Not sig
PKM	1.03893	4.6399e-12	Up
DHX29	-0.0613573	0.185902	Not sig
DNTTIP2	0.00764272	0.870298	Not sig
METTL22	-0.0914664	0.0990824	Not sig
TP53BP1	0.600218	1.25742e-10	Not sig
TRO	-0.135168	0.367069	Not sig
RRP15	-0.00434533	0.939525	Not sig
RHOA	0.0443813	0.245716	Not sig
DHX8	0.148866	0.00042513	Not sig
PMS2P4	0.0233579	0.728306	Not sig
PRKCZ	0.109412	0.330425	Not sig
ZFY	0.145985	0.610876	Not sig
IARS2	-0.0711944	0.263109	Not sig
SYT1	0.911966	7.86456e-05	Not sig
NAV3	0.875423	3.47292e-05	Not sig
IDH3G	-0.417253	4.97009e-09	Not sig
ROGDI	-0.415777	1.23514e-06	Not sig
PDZD4	-0.723079	5.13966e-07	Not sig
ATP2B3	-0.815651	0.00299962	Not sig
ROCK1	0.260024	2.23189e-05	Not sig
CBFB	0.227479	0.000164857	Not sig
PDK3	0.364169	0.000116657	Not sig
HYAL2	-0.133641	0.0207867	Not sig
HDAC4	0.066112	0.386818	Not sig
RASSF1	0.0638432	0.242876	Not sig
FGFR3	0.441119	0.000727133	Not sig
IFI35	-0.269358	0.00555767	Not sig
HEATR6	0.274077	7.68043e-08	Not sig
COASY	-0.124037	0.0374126	Not sig
PLEKHH3	0.165639	0.0335975	Not sig
MEF2A	0.126006	0.109033	Not sig
OTUD5	-0.261354	4.21376e-11	Not sig
TFE3	0.148402	0.00164461	Not sig
TBC1D25	-0.113025	0.0157083	Not sig
ACSL4	0.0704859	0.708453	Not sig
INPP5A	0.0641613	0.323158	Not sig
GPKOW	-0.106036	0.0438597	Not sig
GRIPAP1	-0.0295823	0.467391	Not sig
FTSJ1	0.143142	0.00725207	Not sig
PRR11	1.28251	2.05744e-28	Up
REEP1	0.477861	0.0125551	Not sig
ATP11A	0.514157	9.2871e-09	Not sig
POLR1A	0.188326	0.000107548	Not sig
LAPTM4A	-0.262306	4.20248e-08	Not sig
TTC7A	0.0707353	0.362227	Not sig
IP6K2	0.254507	3.52487e-06	Not sig
STON1-GTF2A1L	-1.55776	0.000548091	Down
SRBD1	0.00111785	0.983252	Not sig
KIF2A	0.459157	5.91193e-17	Not sig
RASGRP2	-0.691896	7.18751e-07	Not sig
PSME4	0.0199639	0.652191	Not sig
IFT80	0.722	1.24428e-16	Not sig
SIRT2	-0.177611	0.0013311	Not sig
ERLEC1	0.0161775	0.731514	Not sig
PPP2R5B	-0.0487894	0.383579	Not sig
PYGM	-0.266611	0.0194395	Not sig
PAGE1	1.71403	0.000436281	Up
PITX1	1.30602	2.24128e-06	Up
TRPC7	1.68655	3.7781e-08	Up
MAST4	-0.0329644	0.741686	Not sig
ADGRF5	-0.357756	0.000148852	Not sig
SDK2	-0.57315	0.020135	Not sig
ADAM7	-0.133943	0.834636	Not sig
NUP133	0.108947	0.0346693	Not sig
NUCKS1	-0.0368474	0.510633	Not sig
VPS35	0.139799	0.0121433	Not sig
DNAJA2	-0.330482	2.1572e-07	Not sig
BCL3	-0.183792	0.0515438	Not sig
KCNAB2	-0.660494	2.38874e-05	Not sig
ABCC9	-0.633463	4.01142e-05	Not sig
GAL	0.141151	0.686117	Not sig
CLEC2D	0.258807	0.0301708	Not sig
FUNDC1	0.203902	0.000692534	Not sig
MAOB	-0.550589	1.31498e-09	Not sig
RORA	-0.359611	0.00134116	Not sig
DRD4	-0.350087	0.0101123	Not sig
TGFBR3	-0.513641	3.6065e-05	Not sig
PLA2G10	0.336445	0.0791527	Not sig
HES2	-0.275089	0.203	Not sig
ATP1B3	0.336176	0.00150236	Not sig
NEDD4	-0.175704	0.101756	Not sig
PIGB	0.0902822	0.174017	Not sig
MAPK6	0.24695	0.000159193	Not sig
GNB5	0.0244551	0.805604	Not sig
RAB27A	0.0362634	0.683617	Not sig
HDHD5	-0.18695	0.00120023	Not sig
UFD1	-0.085648	0.122485	Not sig
LRP6	-0.0897457	0.275576	Not sig
GUCY2C	0.566814	0.059044	Not sig
SCT	-0.493375	0.00869658	Not sig
PHRF1	0.131459	0.00483973	Not sig
ELP1	0.296327	0.00056018	Not sig
NUCB2	0.111264	0.207101	Not sig
PFN2	0.926138	5.18853e-08	Not sig
PTPN3	-0.14253	0.0559072	Not sig
SPTB	0.689067	7.27631e-06	Not sig
DAPP1	0.264013	0.0656415	Not sig
FGF10	-0.0842603	0.75594	Not sig
SLC44A1	0.142189	0.0327169	Not sig
TMEM260	0.115239	0.089759	Not sig
SMG6	0.181	0.0657415	Not sig
EXOC5	0.0803545	0.132759	Not sig
CLTCL1	-0.418209	0.000295222	Not sig
FGF22	0.156573	0.420329	Not sig
FSTL3	-0.0455005	0.791874	Not sig
DGCR2	0.0893361	0.107676	Not sig
RNF126	-0.165261	0.00656923	Not sig
MNT	0.00679856	0.900307	Not sig
ZXDC	0.121666	0.0107682	Not sig
JMJD6	0.0852503	0.229494	Not sig
POLB	-0.26661	0.0054185	Not sig
ST6GALNAC1	-0.238562	0.174858	Not sig
WIPI1	0.0625112	0.513772	Not sig
FRMPD1	0.566102	0.00709511	Not sig
GBA2	0.142054	0.00745554	Not sig
NDST1	-0.0698489	0.345585	Not sig
ASNS	0.633949	0.000274785	Not sig
AP3M2	0.340776	5.73636e-06	Not sig
CNGB1	0.735639	0.00190637	Not sig
ST6GALNAC2	0.873355	3.36891e-06	Not sig
CHAT	0.0200027	0.9751	Not sig
PABPC1	0.0241277	0.79895	Not sig
TESK2	0.111739	0.186083	Not sig
CFAP20	-0.340685	3.18627e-10	Not sig
CSNK2A2	-0.116931	0.0356311	Not sig
PTPN21	-0.120093	0.139984	Not sig
EIF2B3	-0.254692	6.73638e-05	Not sig
CAMK2A	-0.800928	0.00141189	Not sig
TCOF1	0.275447	1.35725e-05	Not sig
CDC42	-0.00996151	0.817498	Not sig
OSBPL3	0.562457	3.26289e-08	Not sig
EPHA8	0.186523	0.513548	Not sig
SLC12A3	0.0895582	0.639006	Not sig
RAD18	0.402767	5.19991e-14	Not sig
ATP2B1	0.441202	8.67487e-09	Not sig
TRPM5	1.06774	2.68057e-05	Up
NCK2	0.745939	2.3392e-09	Not sig
MAP4K4	0.367873	9.41007e-09	Not sig
MGAT4A	0.259208	0.000407281	Not sig
RPL31	-0.281869	0.000617118	Not sig
WDR1	-0.0527137	0.29215	Not sig
SNX13	0.0752681	0.187166	Not sig
MS4A12	-0.560485	0.653947	Not sig
ARHGAP10	-0.304681	0.0149405	Not sig
RPS6KA2	-0.482649	3.52148e-05	Not sig
ING3	0.176895	0.000654071	Not sig
VASH1	0.126073	0.203771	Not sig
LMCD1	-0.0541396	0.56714	Not sig
BUD23	-0.177408	0.00205652	Not sig
SEL1L	-0.267547	0.000204565	Not sig
TRIP13	1.59077	1.69613e-42	Up
ATP6AP1	-0.124448	0.0332695	Not sig
TCF3	0.388801	4.14729e-09	Not sig
TRIB2	-0.252838	0.0449655	Not sig
DAZAP1	0.104633	0.0134474	Not sig
MBD3	-0.158081	0.0265574	Not sig
PRLH	-0.264558	0.651254	Not sig
HLTF	0.704464	2.1773e-07	Not sig
FAM50A	-0.199979	0.0249921	Not sig
FAM3A	-0.43839	1.63257e-10	Not sig
CPSF1	-0.0572551	0.415991	Not sig
MYO3B	0.0697203	0.754904	Not sig
CYBRD1	-0.171795	0.208706	Not sig
CDH19	0.0932697	0.720128	Not sig
PDCD2	-0.0160307	0.782296	Not sig
SLC6A15	3.57033	1.27014e-11	Up
RDH11	-0.447174	6.74259e-09	Not sig
PRKACA	-0.291653	8.24901e-05	Not sig
ADGRL1	-0.16779	0.329071	Not sig
SPP2	-0.631045	0.00414246	Not sig
ACTN1	-0.0340005	0.64437	Not sig
ZFYVE26	0.13842	0.00531928	Not sig
RPS6KA6	0.950877	0.00289585	Not sig
EPN2	0.448692	2.57046e-05	Not sig
PTPN18	-0.127026	0.00420228	Not sig
LIMS2	-0.486637	1.70998e-06	Not sig
ASIC4	0.863491	0.000115519	Not sig
SPEG	1.13243	8.50177e-08	Up
LNX1	0.269448	0.0115853	Not sig
ALDH3A2	-0.435187	5.08312e-06	Not sig
TFRC	0.493242	9.07108e-09	Not sig
SREBF1	-0.0217512	0.846108	Not sig
TRPC5	0.138263	0.600821	Not sig
AFF4	-0.302332	3.9446e-06	Not sig
UBE2D1	0.146186	0.0131071	Not sig
MPP5	-0.111865	0.0561766	Not sig
RHOBTB1	-0.124402	0.521033	Not sig
SMC1A	0.458042	2.79664e-12	Not sig
HSD17B10	-0.410813	1.04115e-06	Not sig
MARK2	0.364794	6.81357e-13	Not sig
HMMR	1.26267	1.44364e-31	Up
CHFR	0.189256	0.00747726	Not sig
TRHDE	1.22817	4.50132e-05	Up
P4HA2	-0.0124271	0.900165	Not sig
FCGR2B	0.458419	0.0142569	Not sig
NFATC3	0.095959	0.292419	Not sig
TRNT1	0.0568591	0.237	Not sig
ACADVL	-0.624776	1.38505e-15	Not sig
STK10	-0.0754415	0.282	Not sig
FBXW11	0.0849914	0.118833	Not sig
ACAP1	-0.176187	0.136567	Not sig
CRMP1	0.539038	0.00058807	Not sig
EVC	0.648313	0.00115124	Not sig
DERL2	-0.350491	1.79606e-08	Not sig
SIDT1	0.238122	0.0812134	Not sig
NDE1	0.728109	2.73027e-27	Not sig
IRAG1	-0.706843	1.44585e-07	Not sig
TMEM38A	-0.297811	0.00205161	Not sig
AP1M1	-0.195162	0.00040079	Not sig
PVR	-0.228294	0.00124746	Not sig
XRCC1	0.232127	8.37014e-05	Not sig
SCARB1	-0.0759368	0.387116	Not sig
CYP2W1	1.15653	9.96412e-09	Up
MCM2	1.73661	1.5712e-45	Up
MOV10L1	-0.40444	0.0117802	Not sig
PANX2	-0.334789	0.0529533	Not sig
SELENOO	-0.625446	7.21137e-15	Not sig
TP63	-0.129733	0.482235	Not sig
ALPK1	-0.138056	0.135788	Not sig
LLGL2	0.238922	0.0012053	Not sig
PDE8A	-0.00679984	0.909757	Not sig
CLCN4	0.0852664	0.235323	Not sig
NLE1	-0.000259422	0.997487	Not sig
SDHA	-0.833915	1.95811e-18	Not sig
SMARCE1	0.0593147	0.394344	Not sig
FNDC8	0.235656	0.30316	Not sig
GSDMB	-0.0567247	0.609649	Not sig
KDM5A	0.0983144	0.0449917	Not sig
ADAM11	0.620905	0.000394133	Not sig
PPP2R3A	0.355394	0.00568445	Not sig
FERMT2	-0.159128	0.0261936	Not sig
ABCB11	-0.646287	0.00107744	Not sig
DHRS9	0.0651123	0.640028	Not sig
CD5L	-0.637734	0.0107067	Not sig
PTGS2	-0.167557	0.349333	Not sig
IGF2BP2	0.59451	0.00236413	Not sig
MAP3K13	0.152027	0.043057	Not sig
ST6GAL1	-0.2155	0.0227426	Not sig
TBX21	-0.128945	0.331081	Not sig
VDAC1P1	0.153169	0.175978	Not sig
FRY	-0.111367	0.210322	Not sig
PICALM	0.110777	0.0114849	Not sig
NSF	0.0448712	0.335576	Not sig
GLI2	0.0618364	0.748219	Not sig
CLASP1	0.0282044	0.56972	Not sig
MRPS34	-0.469715	3.68886e-09	Not sig
NOTCH3	-0.0166273	0.891482	Not sig
CLNS1A	-0.302165	1.21024e-07	Not sig
PPP2R2C	0.101921	0.757308	Not sig
TEAD2	0.46086	0.000134011	Not sig
EED	0.296347	1.52705e-10	Not sig
CDHR2	-0.467947	0.0633651	Not sig
SNCB	0.267927	0.349567	Not sig
TSG101	-0.0259684	0.496168	Not sig
NCBP3	0.0209775	0.697735	Not sig
ATP2A3	-0.0852535	0.518546	Not sig
CA12	0.0572122	0.818648	Not sig
MGLL	0.0556337	0.627357	Not sig
NTN4	-0.208775	0.0822692	Not sig
BCS1L	-0.2875	3.04337e-07	Not sig
NUAK1	0.473979	1.51206e-09	Not sig
DPP8	0.243531	1.07319e-06	Not sig
SLC24A1	0.163169	0.0624571	Not sig
ZNF532	0.617813	1.357e-08	Not sig
SCARF1	-0.304723	9.16139e-06	Not sig
LMAN1	0.000148392	0.998315	Not sig
HACD3	-0.171091	0.0122237	Not sig
IPCEF1	0.177536	0.1825	Not sig
ZZEF1	-0.0207336	0.739999	Not sig
NOX3	0.819018	0.199883	Not sig
ENO1	0.306301	0.000889123	Not sig
SLC12A1	-1.37956	4.98241e-05	Down
MYDGF	-0.281527	9.20928e-05	Not sig
ANO8	0.374563	5.33611e-05	Not sig
TUBE1	-0.468078	8.4024e-07	Not sig
ARHGEF10L	-0.0404412	0.587796	Not sig
TXK	-0.34796	0.00267559	Not sig
WSCD2	-0.572869	0.00223596	Not sig
KCNQ2	0.265744	0.3573	Not sig
TACR2	0.492363	0.00561313	Not sig
ACTR6	0.142655	0.0050334	Not sig
TIPIN	0.535404	8.73944e-17	Not sig
SRI	0.0464404	0.641791	Not sig
EIF4G3	0.0810378	0.198789	Not sig
NUP37	0.438212	1.19831e-15	Not sig
SEMA3A	1.20585	1.76231e-09	Up
GTSE1	1.81942	1.31384e-57	Up
SEMA3C	0.963875	1.11586e-05	Not sig
TTC38	-0.704338	5.6258e-17	Not sig
ACAT1	-0.747319	3.00817e-16	Not sig
GRAMD4	-0.624347	2.06413e-06	Not sig
CELSR1	0.150284	0.271872	Not sig
WNT8B	-0.1975	0.439096	Not sig
ZNF638	0.0355407	0.318085	Not sig
SLC25A40	0.250162	3.15707e-05	Not sig
TIMM21	0.0780553	0.114564	Not sig
ADD2	0.207479	0.212485	Not sig
FGF4	1.58973	0.00788972	Up
RASAL2	0.254492	0.00587487	Not sig
VPS9D1	-0.397674	3.95564e-08	Not sig
ZNF37A	0.373671	4.42139e-10	Not sig
MARK3	0.0917391	0.0287647	Not sig
SLC25A3	-0.173359	0.00116184	Not sig
FNDC3B	0.370639	3.06101e-07	Not sig
FOSL2	-0.016945	0.860597	Not sig
CACNG5	0.261642	0.383661	Not sig
CACNG4	0.732693	0.0160243	Not sig
FRYL	0.113173	0.0532567	Not sig
TMEM131	0.206373	2.87038e-05	Not sig
FSCN1	0.538099	8.16597e-06	Not sig
ACTB	-0.074385	0.184874	Not sig
MOCOS	-0.349983	9.46505e-05	Not sig
PLD1	0.327995	0.00331789	Not sig
ATP12A	2.00596	1.88388e-05	Up
WDR62	1.22107	3.19183e-29	Up
DLG1	0.151427	0.00334635	Not sig
RAB7A	0.020211	0.569572	Not sig
BCAP29	-0.164787	0.0400206	Not sig
SEC31B	-0.479421	1.97166e-06	Not sig
SART3	0.283561	1.88726e-16	Not sig
ARHGAP15	-0.247863	0.0321765	Not sig
TUBA3D	0.42854	0.0293733	Not sig
PAX2	-0.764972	0.0245571	Not sig
EXOSC7	-0.169409	0.00484736	Not sig
KIFAP3	-0.116512	0.0821758	Not sig
MKRN2	0.230151	1.56615e-06	Not sig
MCM6	0.970556	1.51353e-33	Not sig
REXO2	-0.208933	0.000396283	Not sig
RBM7	-0.192116	6.99616e-05	Not sig
RBMS2	0.231034	0.0128887	Not sig
BAZ2A	0.526894	1.03348e-18	Not sig
PTPN23	0.233106	5.37748e-07	Not sig
MLH1	0.122597	0.00331957	Not sig
UNG	0.28211	1.57461e-07	Not sig
FMO4	-0.802927	9.18607e-11	Not sig
KLHL20	-0.0402201	0.596767	Not sig
RGS11	-0.552255	0.00254778	Not sig
SLC46A1	-0.161041	0.0470448	Not sig
PLXNA2	-0.0551747	0.438272	Not sig
SPAG5	1.0007	7.82316e-25	Up
ANKRD13A	0.191546	0.000693794	Not sig
TPD52	0.072666	0.422033	Not sig
ACACB	-0.0811119	0.461902	Not sig
TRAF4	-0.0549534	0.373533	Not sig
PAG1	0.41321	0.000912168	Not sig
GPATCH1	0.129276	0.00843395	Not sig
ICAM3	0.297996	0.0412384	Not sig
NT5C2	0.321793	0.00274457	Not sig
MCAM	0.151188	0.119358	Not sig
GPC4	0.300572	0.159036	Not sig
MBNL3	0.0973084	0.48721	Not sig
CAMSAP3	-0.0620331	0.457119	Not sig
RAP1GAP	0.3817	0.00931791	Not sig
XAB2	-0.243666	2.97975e-05	Not sig
ARHGEF1	0.170005	0.000905195	Not sig
STXBP2	-0.0402754	0.642938	Not sig
MAP2K7	-0.189118	4.31792e-05	Not sig
NMRK2	-0.609303	0.0570023	Not sig
DGKD	0.250107	3.53081e-05	Not sig
CTTNBP2	-0.11602	0.62509	Not sig
ACTL6B	0.387298	0.044072	Not sig
RARB	-0.126403	0.317056	Not sig
TOP2B	0.209866	5.24303e-06	Not sig
TM9SF3	-0.0631946	0.120792	Not sig
NFKB2	0.00700724	0.926049	Not sig
UBE2T	0.97481	2.52191e-24	Not sig
PPP1R12B	-0.201476	0.0103999	Not sig
DNAJC10	0.288481	7.38686e-06	Not sig
GTF3C1	0.0814233	0.0839972	Not sig
IL4R	0.0496839	0.551256	Not sig
USP33	0.232475	6.13642e-06	Not sig
PAK3	-0.277526	0.311484	Not sig
CAPN6	1.84665	1.48107e-08	Up
DCX	-0.100142	0.692359	Not sig
SNRPA	0.00189391	0.979963	Not sig
SPAG6	1.07217	4.18282e-06	Up
EXOSC5	-0.281264	0.000507068	Not sig
DYNC1I2	0.199563	0.00142335	Not sig
APBB1IP	0.269249	0.0429038	Not sig
LRCH4	0.224541	0.0100737	Not sig
FAM76B	0.184578	0.0106569	Not sig
SIRT6	-0.080782	0.248609	Not sig
TYR	-0.498577	0.453871	Not sig
POLD3	0.546018	2.63818e-16	Not sig
ACTN2	-1.62721	7.18729e-10	Down
CAPZB	-0.0708233	0.135629	Not sig
GPR137B	-0.046557	0.693692	Not sig
NAALAD2	0.872407	4.69854e-07	Not sig
JADE1	-0.0624218	0.388921	Not sig
SLC25A43	0.0365831	0.627551	Not sig
UBE2A	-0.0557348	0.299738	Not sig
FGFR1	0.309395	0.0465981	Not sig
FKBP6	0.167536	0.446518	Not sig
SMC1B	1.77578	2.31908e-16	Up
FBLN1	0.931852	1.42419e-07	Not sig
ITGA8	0.0570358	0.661865	Not sig
CST7	-0.182907	0.220841	Not sig
MAP2	-0.142695	0.366219	Not sig
PIAS2	0.113984	0.0160034	Not sig
AMPH	0.499933	0.0084593	Not sig
ARAF	-0.256729	1.78292e-05	Not sig
MCCC1	-0.101564	0.217095	Not sig
LAMP3	0.570887	0.000241669	Not sig
FAP	0.233158	0.229483	Not sig
NEBL	1.08396	1.51014e-06	Up
ACER3	0.0651151	0.348687	Not sig
UBE2K	0.0244411	0.613777	Not sig
PIK3C3	0.0692744	0.119078	Not sig
N4BP2	0.38173	2.44563e-05	Not sig
TIGAR	-0.228862	0.00994742	Not sig
TULP3	0.298033	2.96198e-06	Not sig
SYNJ2	0.652161	1.28326e-13	Not sig
ADCY2	-0.00383581	0.987603	Not sig
PPP2R5C	-0.252644	4.43866e-07	Not sig
PMS2P1	-0.202283	0.000831301	Not sig
RBFOX1	1.14079	5.55522e-06	Up
GNB1	0.0636659	0.169371	Not sig
HOXA9	0.0598729	0.788842	Not sig
EDN1	0.108743	0.448676	Not sig
MLLT10	0.273078	2.46018e-05	Not sig
ZCWPW1	-0.511456	1.6961e-07	Not sig
ADCYAP1R1	0.169119	0.402083	Not sig
FGF20	0.712435	0.0271636	Not sig
P2RY10	0.100867	0.555247	Not sig
ITM2A	0.247438	0.0799865	Not sig
NRDC	-0.0452248	0.329541	Not sig
VDAC3	-0.0441934	0.552816	Not sig
PCM1	0.0419321	0.613539	Not sig
TNRC6C	-0.0628493	0.495701	Not sig
CBFA2T2	0.4779	2.18937e-15	Not sig
BRINP1	-0.751804	0.00435747	Not sig
ITCH	0.0368702	0.545475	Not sig
PKD2L2	-0.062651	0.725065	Not sig
TP53INP2	-0.187927	0.0464489	Not sig
SDF4	-0.142612	0.011405	Not sig
MYH7B	-0.0139934	0.923055	Not sig
BPIFB2	0.358308	0.285094	Not sig
TP73	1.13579	5.55585e-13	Up
TOLLIP	-0.310426	2.73069e-08	Not sig
UBE2D4	-0.546746	3.5668e-16	Not sig
CLUL1	0.187544	0.361223	Not sig
RUNX1T1	-0.622804	2.31455e-06	Not sig
CDH17	2.50781	1.41621e-17	Up
THOC1	0.303779	3.35096e-08	Not sig
FKBP7	-0.157139	0.0440508	Not sig
OSBPL6	0.634527	8.08274e-07	Not sig
SLC1A3	0.0470999	0.738946	Not sig
XRCC5	0.118938	0.0030563	Not sig
LXN	-0.0415386	0.753613	Not sig
SP140	0.664062	1.78619e-05	Not sig
MKNK1	0.0628072	0.145321	Not sig
TNS1	0.100696	0.229236	Not sig
REXO1	0.104844	0.121125	Not sig
SAR1A	-0.14743	0.00033218	Not sig
CDC14A	0.699105	4.37312e-13	Not sig
RAPGEF3	-0.616018	1.35318e-11	Not sig
CEACAM1	-0.283921	0.00571531	Not sig
SENP1	0.447411	1.01959e-21	Not sig
DUSP13	-0.242938	0.382119	Not sig
CIC	0.167927	0.00188221	Not sig
LIPE	-0.329278	0.0141837	Not sig
FDFT1	-0.081625	0.374218	Not sig
PAFAH1B3	0.500267	0.000607374	Not sig
OPHN1	0.470316	0.000152372	Not sig
AFM	-0.92638	7.63293e-08	Not sig
KIF22	0.4552	1.87948e-10	Not sig
SCGN	0.114567	0.617844	Not sig
CARMIL1	0.813283	6.68055e-11	Not sig
PGM1	-0.407303	1.08938e-06	Not sig
DDX1	0.0172574	0.679919	Not sig
DNM2	0.0910087	0.0762261	Not sig
EPB41L2	0.623077	2.35849e-12	Not sig
RIMS1	0.336731	0.173285	Not sig
MOXD1	-0.0607241	0.768115	Not sig
STX7	0.11703	0.0622	Not sig
RABL2B	0.0909733	0.103127	Not sig
KEAP1	-0.254048	3.24699e-06	Not sig
DDX43	0.362156	0.122995	Not sig
PTPRH	-0.414926	0.00594684	Not sig
DCT	-0.582442	0.00834572	Not sig
SLC35C2	-0.0697315	0.157545	Not sig
CRYBG3	0.497853	0.00195897	Not sig
EPHA6	2.95688	2.01082e-14	Up
SCTR	1.11443	1.35672e-07	Up
RFX3	0.50224	1.11917e-10	Not sig
RIF1	0.441949	1.72088e-16	Not sig
RAB21	-0.0338876	0.386745	Not sig
SLC4A4	-0.287188	0.0866708	Not sig
SMARCA2	-0.135114	0.138121	Not sig
RDH8	0.638966	0.0674664	Not sig
SESN1	-0.28091	0.000436503	Not sig
MID2	-0.139738	0.160074	Not sig
DNAAF6	-0.380479	0.377498	Not sig
COL5A3	-0.389074	0.0107349	Not sig
SRCAP	0.192388	0.00738668	Not sig
PUM3	0.154263	0.0269043	Not sig
CPB2	-0.798848	1.00383e-11	Not sig
CHRNA3	-0.0875654	0.753314	Not sig
KCNN2	-0.813959	0.00016612	Not sig
CNOT4	-0.0338576	0.404793	Not sig
PSEN1	-0.0837934	0.0573837	Not sig
CPOX	0.0908855	0.13882	Not sig
CLDND1	0.0796843	0.0648629	Not sig
MOK	0.232761	0.00640582	Not sig
HSP90AA1	0.00750024	0.908215	Not sig
RBL1	1.10342	5.90655e-46	Up
DLGAP4	0.0706728	0.228715	Not sig
IGSF9B	0.0987683	0.560783	Not sig
CFHR2	-0.9655	1.40745e-10	Not sig
CROCCP3	0.417618	2.78443e-06	Not sig
NDC80	1.33236	3.0001e-37	Up
AP4E1	0.344382	6.98225e-13	Not sig
RSBN1	0.140875	0.0109763	Not sig
MAGI3	0.23031	0.00466731	Not sig
CXCL2	-0.962703	2.28365e-09	Not sig
AFP	0.345276	0.293651	Not sig
COL4A4	0.214049	0.194342	Not sig
TCF7	-0.238704	0.0911043	Not sig
OSTM1	0.0143576	0.854465	Not sig
CDH7	-0.687251	0.0558427	Not sig
IMPG2	0.0146144	0.900729	Not sig
PCNP	0.183407	3.3145e-07	Not sig
EXD2	0.298562	1.06724e-07	Not sig
ARG2	-0.285796	0.0996201	Not sig
MEF2C	-0.301575	0.000310317	Not sig
PTPRC	0.39512	0.00719379	Not sig
CACNA1S	0.37052	0.0620269	Not sig
PKP1	-0.601651	0.0102458	Not sig
UBA5	-0.0255472	0.551242	Not sig
STK17B	0.331983	0.00385013	Not sig
CDC14B	-0.660672	1.05546e-09	Not sig
ZNF510	0.210575	0.00447663	Not sig
LRP2	0.353552	0.243634	Not sig
ZNF506	0.521972	1.39582e-06	Not sig
JMJD4	-0.237216	0.00211	Not sig
DUSP12	0.264165	2.24604e-06	Not sig
AACS	0.551834	1.95264e-10	Not sig
DELE1	-0.174649	0.000941512	Not sig
SLC13A1	0.702167	0.131408	Not sig
CADPS2	0.326584	0.00024663	Not sig
PCDHB4	-0.409295	0.00610493	Not sig
PCDHA6	0.921573	0.00653605	Not sig
PCDHGA2	-0.0983525	0.632339	Not sig
HSPB11	0.045796	0.471862	Not sig
PHLPP1	-0.253112	0.00215099	Not sig
ATP8B1	0.278231	0.00191883	Not sig
IL12RB2	-0.795364	1.91336e-06	Not sig
SMARCD3	0.388067	0.00925172	Not sig
WDR70	-0.173952	0.000390653	Not sig
FYB1	0.422388	0.00210072	Not sig
MPP4	0.0509063	0.786771	Not sig
STRADB	-0.107154	0.0778619	Not sig
BZW1	-0.0238548	0.658365	Not sig
PGR	-0.0075585	0.972809	Not sig
C1QTNF3	-1.68778	3.244e-16	Down
ME2	0.423077	2.16389e-10	Not sig
C5orf22	0.212759	1.43111e-05	Not sig
CCNT2	0.138882	0.0161014	Not sig
FAM135A	0.296545	0.000653623	Not sig
COL19A1	0.426761	0.0772174	Not sig
EPB41L3	-0.0986317	0.47224	Not sig
COBLL1	-0.465651	1.4895e-05	Not sig
DLG3	0.849918	1.28762e-07	Not sig
KCNK2	1.84516	4.6479e-06	Up
SERTAD4	-0.126497	0.533659	Not sig
TRAF5	0.640962	6.90302e-11	Not sig
MRPL22	-0.272814	1.859e-05	Not sig
GEMIN5	0.210571	1.39643e-05	Not sig
OPRK1	-0.310905	0.472368	Not sig
NFE2L1	-0.185388	0.0119678	Not sig
SEMA5B	0.436899	0.000126819	Not sig
GSK3B	0.133207	0.0014307	Not sig
ITGB5	0.084226	0.21957	Not sig
ERC1	0.148577	0.0147957	Not sig
XPO1	0.269118	7.4185e-12	Not sig
LINC01587	-0.0433087	0.883145	Not sig
RNF13	0.00486998	0.922435	Not sig
TRPM3	-1.32433	3.86337e-10	Down
PALB2	0.374719	2.30385e-12	Not sig
DOP1A	0.229006	0.0098949	Not sig
LYRM2	0.00820979	0.873941	Not sig
BCKDHB	-0.34727	0.000596279	Not sig
KAT6A	0.285139	9.39817e-05	Not sig
TUT7	-0.316309	0.000424134	Not sig
ULK2	-0.0251401	0.851914	Not sig
GRHL2	2.13304	2.15832e-13	Up
TNPO1	0.117617	0.0162139	Not sig
PLOD1	-0.0224314	0.779633	Not sig
P2RX5	0.258294	0.194089	Not sig
ITGAE	0.133352	0.207818	Not sig
DIS3	-0.0320148	0.565791	Not sig
PIBF1	0.0611579	0.330169	Not sig
TDRD3	-0.325495	1.00406e-08	Not sig
AC000061.1	-0.055856	0.920432	Not sig
NUFIP1	-0.0936255	0.101225	Not sig
PDS5B	0.107441	0.0547554	Not sig
OXCT1	0.258599	0.175521	Not sig
RRAGB	0.0348445	0.589157	Not sig
EPYC	1.08167	0.000467754	Up
CYLD	-0.116506	0.0466708	Not sig
SLC27A5	-1.30543	1.02588e-14	Down
ZNF324	-0.130646	0.0189725	Not sig
ZNF671	-0.039004	0.728285	Not sig
ZNF416	0.0846206	0.232954	Not sig
ZNF586	0.268528	3.93762e-05	Not sig
ZNF446	-0.00027906	0.995505	Not sig
ZNF264	0.156008	0.0188665	Not sig
RPS5	-0.298695	0.00171573	Not sig
FAT1	0.0380452	0.748834	Not sig
YTHDC1	0.12236	0.00148284	Not sig
CHMP2B	0.227407	3.46877e-06	Not sig
SMAP2	-0.140598	0.0107205	Not sig
PPIE	-0.066576	0.232715	Not sig
ZMPSTE24	-0.0478359	0.340088	Not sig
STARD7	-0.0705925	0.0883555	Not sig
NOA1	0.0161338	0.771316	Not sig
REST	0.157627	0.00251994	Not sig
HAL	-0.0685743	0.747171	Not sig
SSH1	0.111805	0.0432181	Not sig
GSTP1	0.528991	0.000482424	Not sig
APLP2	-0.0562757	0.361023	Not sig
FAM234B	0.00833152	0.920749	Not sig
SLCO1A2	-0.337028	0.0582334	Not sig
WBP11	0.157564	0.000589703	Not sig
EIF3I	-0.125033	0.0473493	Not sig
NKAIN1	0.66683	0.0138714	Not sig
COL16A1	0.265415	0.134924	Not sig
TXLNA	0.0178072	0.742623	Not sig
APOB	-0.299349	0.00625061	Not sig
NCOA1	0.0908563	0.100873	Not sig
AGBL5	0.309708	4.218e-06	Not sig
EFR3B	0.371803	0.000919174	Not sig
KIF3C	1.02196	2.30512e-13	Up
RAB10	0.191061	0.000342415	Not sig
GCKR	-0.616985	2.24148e-06	Not sig
HADHA	-0.294288	5.08563e-08	Not sig
MAPRE3	-0.292015	0.00023893	Not sig
CAD	0.440037	1.56758e-10	Not sig
CD59	-0.369718	2.92432e-07	Not sig
CD82	-0.168121	0.0491074	Not sig
BCORL1	0.493635	5.95157e-08	Not sig
ATRX	0.100442	0.120849	Not sig
AK6	-0.153557	0.00660579	Not sig
FCN1	-0.222167	0.128973	Not sig
MYNN	0.109569	0.00575367	Not sig
MECOM	0.572947	2.79401e-06	Not sig
SCAMP1	-0.156337	0.00912966	Not sig
PREP	-0.0486091	0.374283	Not sig
HACE1	0.549257	1.02885e-09	Not sig
SEH1L	0.0739633	0.0981641	Not sig
WDR47	0.323613	1.66782e-06	Not sig
WDFY1	0.112369	0.0232486	Not sig
OVGP1	-0.104887	0.470198	Not sig
SLC25A24	0.857151	5.35402e-09	Not sig
MAP3K4	0.226662	2.26452e-05	Not sig
PILRA	-0.00479763	0.963091	Not sig
IGSF9	-0.11161	0.602557	Not sig
ABCB1	-0.296458	0.0492928	Not sig
ZNF213	0.379965	5.76471e-06	Not sig
AKR1B1	0.444073	0.00469479	Not sig
CPNE3	-0.122602	0.0626903	Not sig
RRN3	-0.229942	5.68926e-05	Not sig
CTTN	0.101779	0.0855719	Not sig
WNT11	-0.381457	0.0515676	Not sig
MTIF2	-0.122484	0.00470995	Not sig
DDHD2	0.307269	5.50819e-05	Not sig
TTC39A	0.71388	7.78792e-05	Not sig
EPS15	-0.0128515	0.780987	Not sig
ORC1	1.38757	9.22423e-37	Up
MGST2	-0.677042	4.36568e-17	Not sig
CHERP	0.0688054	0.383177	Not sig
ATG16L1	-0.0649519	0.0977312	Not sig
USP40	-0.0388466	0.457878	Not sig
POMGNT1	-0.129437	0.0200087	Not sig
RAD54L	1.95272	1.70714e-56	Up
MAST2	0.336317	9.86071e-08	Not sig
DNAJA1	-0.142971	0.0260405	Not sig
B4GALT1	-0.039622	0.539039	Not sig
CHMP5	-0.0615853	0.193605	Not sig
NFX1	-0.0206594	0.674351	Not sig
AQP6	-2.03277	1.06252e-10	Down
DIMT1	0.179977	0.0307662	Not sig
IPO11	-0.094129	0.0214547	Not sig
FOLH1	-0.546975	6.36933e-05	Not sig
EIF2AK1	-0.0990789	0.0216822	Not sig
NME8	-0.166261	0.321743	Not sig
EPDR1	-0.137576	0.239068	Not sig
SNX10	-0.0170069	0.885761	Not sig
SEPHS1	0.118571	0.00636223	Not sig
MRPL28	-0.569897	1.04554e-12	Not sig
HBQ1	0.967538	0.00948746	Not sig
ITPKC	-0.0442773	0.505738	Not sig
CEACAM6	1.55901	5.08583e-05	Up
FAT2	0.483169	0.0016127	Not sig
RBM22	-0.1146	0.00815309	Not sig
TMED2	-0.0120825	0.7888	Not sig
ERO1B	0.0304653	0.790956	Not sig
ZFAND6	-0.0342654	0.399965	Not sig
HSD17B2	-0.507916	0.000504632	Not sig
TXLNG	0.283578	9.59338e-06	Not sig
PPEF1	0.163384	0.367686	Not sig
LAT2	0.113363	0.302959	Not sig
HUWE1	0.184244	3.19927e-05	Not sig
ZW10	0.100688	0.0181529	Not sig
ALG9	0.0402934	0.566745	Not sig
MYBPC2	0.389252	0.0685022	Not sig
NOX4	-0.135524	0.250203	Not sig
ACOX3	-0.223211	0.00124248	Not sig
MTMR2	0.522082	2.65985e-12	Not sig
PPP1R15A	-0.0784065	0.362446	Not sig
HSD17B14	-0.322971	0.0737062	Not sig
TRIP6	-0.156548	0.10913	Not sig
ACHE	0.208256	0.301948	Not sig
FTL	-0.516196	9.22894e-06	Not sig
SRRT	0.225991	6.4865e-08	Not sig
BAX	-0.0516363	0.505244	Not sig
NLK	-0.0288915	0.538899	Not sig
PIGS	0.52028	1.39434e-13	Not sig
ADAMTS2	-0.265765	0.0981696	Not sig
TMPRSS11E	0.442397	0.213664	Not sig
ATXN7L3	0.354605	5.03247e-11	Not sig
PGS1	0.273235	5.18592e-09	Not sig
PSMC5	-0.370018	6.8528e-07	Not sig
UIMC1	0.18036	1.63021e-05	Not sig
CETP	-1.12611	1.22981e-15	Down
MMP2	-0.433186	0.00774368	Not sig
MT3	-0.878295	0.0094993	Not sig
LPCAT2	-0.24418	0.0848181	Not sig
GNAO1	-0.816643	6.74223e-05	Not sig
OGFOD1	-0.128337	0.00758314	Not sig
SH3BP2	-0.213019	0.00990299	Not sig
NOP14	-0.0752959	0.12725	Not sig
ADD1	0.0199344	0.674988	Not sig
L2HGDH	-0.0470348	0.567542	Not sig
TXNDC16	0.279254	0.000484237	Not sig
RTRAF	-0.239687	5.04764e-06	Not sig
NID2	0.316849	0.0325734	Not sig
GMCL1	0.396377	3.24194e-10	Not sig
SF3B2	0.0920671	0.00901002	Not sig
KLHL42	0.476321	9.39962e-13	Not sig
GNAS	0.175333	0.0223878	Not sig
DNM1L	0.281746	4.81175e-09	Not sig
PTHLH	1.42923	1.39273e-09	Up
PHACTR3	-0.221204	0.274644	Not sig
ERGIC2	0.112786	0.0443823	Not sig
TFAP2C	-0.412445	0.186459	Not sig
AURKA	0.787473	6.3447e-14	Not sig
CASS4	-0.526306	3.01534e-06	Not sig
PIR	-0.375182	0.000762191	Not sig
AAMDC	-0.46212	1.84583e-08	Not sig
RFX2	0.319012	0.000543299	Not sig
METTL2A	-0.080515	0.143042	Not sig
SULT2B1	-1.3783	1.67967e-08	Down
ALG6	0.0771162	0.126168	Not sig
CNOT3	0.338507	7.82398e-13	Not sig
GP6	-0.659147	0.00040925	Not sig
PTPN4	-0.0363278	0.508359	Not sig
DDX18	0.16727	0.000349494	Not sig
KHSRP	0.240997	2.22853e-07	Not sig
GNA11	-0.0872295	0.0476695	Not sig
ASAP3	0.0473978	0.645702	Not sig
EDEM2	-0.0346799	0.488551	Not sig
DNMT3B	1.06951	1.01196e-25	Up
REM1	-0.57242	2.95522e-05	Not sig
TPX2	1.58024	6.79251e-57	Up
FER1L4	0.823359	7.41738e-05	Not sig
PDRG1	0.0410817	0.53153	Not sig
EPB41L1	0.517267	0.00698724	Not sig
SLC15A1	0.291043	0.0995237	Not sig
DOCK9	0.105231	0.216846	Not sig
ANKRD10	0.118038	0.0751	Not sig
TGDS	-0.004084	0.967017	Not sig
DOCK3	0.845902	4.40195e-09	Not sig
C3orf18	-0.045635	0.634995	Not sig
COQ9	-0.393515	2.86319e-07	Not sig
TMEM40	-0.761112	0.00148178	Not sig
KIF9	-0.343591	1.32543e-05	Not sig
ARHGAP28	0.531799	0.00135278	Not sig
CRLS1	-0.370306	8.51461e-05	Not sig
DEFB127	-0.387858	0.893354	Not sig
PPP1R13B	0.132816	0.0280082	Not sig
ATRN	0.0680449	0.430458	Not sig
SMOX	0.348776	0.00871615	Not sig
SIGLEC1	-0.189964	0.132822	Not sig
FKBP1A	-0.18304	0.00581741	Not sig
NSFL1C	-0.107241	0.0418012	Not sig
SLC4A11	0.834784	6.67765e-05	Not sig
C20orf194	0.202521	0.0213181	Not sig
ZNF343	0.10072	0.0621086	Not sig
EBF4	-0.0926157	0.578147	Not sig
CPXM1	-0.302748	0.0745118	Not sig
MAVS	0.111638	0.0693496	Not sig
LZTS3	0.254522	0.00420054	Not sig
F11	-0.450063	0.000878397	Not sig
XRN2	0.0826751	0.10776	Not sig
KIZ	-0.146562	0.0922232	Not sig
DYNLL1	-0.0788932	0.17407	Not sig
TESC	-0.0760969	0.733168	Not sig
SNX5	0.07169	0.134823	Not sig
RPL6	-0.105369	0.142511	Not sig
SIRPG	0.448727	0.0106789	Not sig
MAPKAPK5	0.163773	4.79982e-06	Not sig
P2RX7	0.497231	0.000465997	Not sig
ESF1	0.265818	3.0239e-05	Not sig
RBBP9	-0.250841	0.00107955	Not sig
ANAPC5	0.138773	0.000389568	Not sig
SLC23A2	-0.708433	4.8623e-10	Not sig
SLC8B1	-0.0639735	0.403623	Not sig
TMEM230	-0.134399	0.0091755	Not sig
DZANK1	0.341878	6.10549e-05	Not sig
KDM2B	0.137859	0.0193784	Not sig
CFAP61	0.364109	0.07476	Not sig
LHX5	0.990802	0.00623936	Not sig
TASP1	0.250121	6.86575e-05	Not sig
OAS1	-0.449063	7.60144e-05	Not sig
GCN1	0.222256	2.04048e-06	Not sig
RPLP0	-0.0675387	0.416098	Not sig
PXN	0.0390729	0.40141	Not sig
SIRT4	-0.138462	0.0686565	Not sig
RPH3A	0.0704582	0.681369	Not sig
KIF16B	0.0705242	0.323987	Not sig
TRMT6	0.286063	7.22679e-08	Not sig
CHGB	0.247177	0.431213	Not sig
PEBP1	-0.637929	2.29088e-14	Not sig
TBX5	-0.59202	0.111594	Not sig
BRAP	0.041218	0.245221	Not sig
ERP29	-0.155369	0.0094529	Not sig
NOS1	-1.21882	6.92958e-07	Down
FUS	0.29204	7.51754e-08	Not sig
IGBP1	-0.183704	0.00313055	Not sig
FXYD5	0.00300499	0.979732	Not sig
ZNF302	0.109036	0.0805378	Not sig
GRAMD1A	0.2944	0.00558198	Not sig
FXYD3	1.62841	3.27005e-09	Up
HEPH	-0.300462	0.0240503	Not sig
CDIP1	-0.331391	8.88581e-07	Not sig
CMTM1	0.726786	3.58192e-09	Not sig
KCNH4	0.197784	0.235289	Not sig
GANAB	0.0810029	0.0617253	Not sig
GMIP	0.369411	9.23522e-06	Not sig
RBM41	0.104518	0.103882	Not sig
BIRC5	1.09887	8.28462e-16	Up
LAG3	0.284774	0.0951681	Not sig
MLF2	-0.29424	2.00768e-08	Not sig
OTUB2	-0.0187138	0.845423	Not sig
DDX24	-0.229662	1.84408e-06	Not sig
ZBTB25	-0.0119454	0.838577	Not sig
NECAP1	-0.066218	0.169368	Not sig
ARHGAP4	0.0371448	0.76458	Not sig
ANKRD24	-0.716636	2.07503e-11	Not sig
DHX32	0.172927	0.0724763	Not sig
RCOR1	0.145654	0.00885166	Not sig
GPATCH2L	0.299724	1.3443e-07	Not sig
LTBP4	-0.282393	0.0402771	Not sig
BLVRB	-0.601864	7.29835e-11	Not sig
SLC9A1	0.131798	0.168835	Not sig
SPTLC1	0.223751	4.30413e-05	Not sig
PAPOLA	0.131829	0.00144054	Not sig
CCNK	0.48395	2.27255e-05	Not sig
PCBP4	0.0437856	0.583993	Not sig
RGS1	0.656208	0.000111294	Not sig
YPEL3	-0.369317	2.8049e-07	Not sig
MRPS33	-0.383224	1.03793e-09	Not sig
NDUFB2	-0.588257	7.93365e-13	Not sig
NUDC	-0.212649	0.00485798	Not sig
MAEA	0.0761766	0.11443	Not sig
ICAM1	0.312956	0.0178008	Not sig
STRN4	0.240372	2.57507e-07	Not sig
IRAK3	-0.143875	0.267991	Not sig
LYZ	0.332349	0.127824	Not sig
SI	2.91418	2.02115e-09	Up
MUL1	-0.22388	1.27316e-05	Not sig
TFAP4	0.151055	0.016143	Not sig
PDCD7	0.261967	8.76254e-12	Not sig
SPG21	-0.11331	0.012093	Not sig
FETUB	-0.559953	0.00660699	Not sig
DNAJB11	0.149576	0.00592829	Not sig
P3H2	0.243652	0.0902564	Not sig
THPO	-0.252885	0.012305	Not sig
CHRD	-0.180171	0.137791	Not sig
FLT3LG	-0.085648	0.49655	Not sig
RAB11FIP3	-0.130521	0.0459169	Not sig
GNPTG	-0.478673	8.44484e-14	Not sig
ZNF268	0.0263509	0.708517	Not sig
GOLGA3	0.095577	0.040743	Not sig
PABPC4	0.0285476	0.632396	Not sig
CD209	0.00887481	0.949534	Not sig
CERS4	-0.532381	3.54546e-08	Not sig
MCOLN1	-0.211581	0.000416403	Not sig
USP48	0.174601	6.05415e-05	Not sig
EFNB1	0.0745607	0.37787	Not sig
PDPR	0.0144453	0.845173	Not sig
AARS1	-0.165055	0.00895564	Not sig
GLG1	0.108808	0.0368947	Not sig
KIF4A	1.64562	1.15298e-45	Up
TNRC6A	-0.0450937	0.472721	Not sig
PLEKHG2	0.545598	2.56504e-10	Not sig
DLL3	1.15991	0.000119319	Up
NAT14	-0.0126538	0.922545	Not sig
PITPNM2	-0.27279	0.0035777	Not sig
EXOC1	0.113765	0.0277632	Not sig
RBM27	-0.000370118	0.992229	Not sig
POU4F3	-0.0666168	0.638061	Not sig
OSBPL8	0.138191	0.0565606	Not sig
DTX2	-0.024088	0.706893	Not sig
NLRC4	0.0138513	0.86079	Not sig
PUS7	0.395379	2.27101e-09	Not sig
LAMB4	0.134045	0.354456	Not sig
NRCAM	-0.253637	0.329854	Not sig
LAMB1	0.554556	2.80013e-06	Not sig
SLC26A4	-0.440651	0.00013787	Not sig
SLC26A3	-0.106757	0.678881	Not sig
DLD	-0.188596	0.00451966	Not sig
WDR7	-0.150928	0.0111043	Not sig
TXNL1	-0.174652	0.000986205	Not sig
IL5RA	-0.544798	0.00363097	Not sig
ABCC6	-0.521886	9.06777e-08	Not sig
CMTM6	-0.00852301	0.905733	Not sig
ITGA6	-0.0614856	0.508085	Not sig
RAPGEF4	-0.0113367	0.914748	Not sig
MAP3K20	0.0074408	0.928456	Not sig
SMPX	-0.933203	0.000206498	Not sig
FH	-0.431994	2.65931e-07	Not sig
SEL1L3	0.851306	5.45371e-07	Not sig
TF	-0.399591	0.00393957	Not sig
CDV3	0.181246	1.49325e-05	Not sig
MYO15A	-0.382323	0.00514639	Not sig
ALKBH5	-0.142601	0.0168754	Not sig
APOH	-0.784454	7.61283e-09	Not sig
NLRP1	-0.0361722	0.775626	Not sig
PITPNM3	0.449159	0.015241	Not sig
SPAG7	-0.578305	7.98292e-16	Not sig
ORC6	1.43141	1.78073e-38	Up
ZFHX4	0.0614212	0.599329	Not sig
SLC17A6	-0.283222	0.684706	Not sig
CPA1	1.18945	0.000505747	Up
ZC3HC1	-0.102621	0.0520711	Not sig
ESR1	-1.60236	9.89205e-17	Down
RGS17	0.788888	4.39663e-09	Not sig
ANGPT2	0.167358	0.144923	Not sig
TMEM101	-0.0900856	0.217487	Not sig
CD200	-0.199064	0.0820149	Not sig
CCDC80	-0.573104	0.00500152	Not sig
CMA1	-1.56138	1.53182e-10	Down
PSME1	-0.231722	0.000459397	Not sig
PPP2R3C	-0.0902158	0.0753348	Not sig
HAUS4	-0.208724	0.030958	Not sig
JPH4	-0.0953711	0.490044	Not sig
MYH7	0.554924	0.0814669	Not sig
CEBPE	0.147106	0.428433	Not sig
SLC7A8	0.45536	0.000572689	Not sig
OSGEP	-0.185188	0.000103004	Not sig
SLC22A17	0.497521	0.0174269	Not sig
RNF31	0.306456	0.00128744	Not sig
SCFD1	0.00846341	0.833172	Not sig
G2E3	0.518979	3.44771e-19	Not sig
HECTD1	0.0495343	0.447897	Not sig
HNRNPC	0.0945315	0.00302311	Not sig
RPGRIP1	0.105935	0.337539	Not sig
SUPT16H	0.304609	1.51066e-12	Not sig
TOX4	0.0208695	0.562664	Not sig
GEMIN2	0.275062	1.41924e-06	Not sig
TGM1	0.145142	0.209554	Not sig
TINF2	-0.0291941	0.492594	Not sig
DAZL	0.0742918	0.829732	Not sig
TBL1Y	0.963425	0.00842925	Not sig
SEMA6A	1.30554	8.36939e-15	Up
TRPM7	0.0297415	0.734617	Not sig
TYRO3	0.771542	6.53646e-06	Not sig
WDR76	1.36835	2.30802e-42	Up
CAPN3	-0.342955	0.0243712	Not sig
SNAP23	0.0435801	0.421098	Not sig
TBX15	-0.0230164	0.905493	Not sig
PHGDH	0.334049	0.0370089	Not sig
COL9A3	0.343989	0.0822016	Not sig
EZR	0.0778749	0.430364	Not sig
MYL6	-0.417072	5.49144e-09	Not sig
AGO1	0.185033	0.00164352	Not sig
TEKT2	0.846687	1.27541e-05	Not sig
CLSPN	1.70698	1.06905e-52	Up
RFFL	0.16412	0.0683825	Not sig
UNC13D	0.213474	0.11909	Not sig
MFSD11	-0.0184425	0.76108	Not sig
DPYSL2	-0.0345835	0.723539	Not sig
TGFB2	0.573446	0.000649207	Not sig
GPATCH2	0.264444	2.61696e-06	Not sig
NUP50	0.188146	0.000608807	Not sig
CDC45	1.26512	2.13356e-30	Up
COMT	-0.513471	2.42383e-07	Not sig
ADA2	0.00677162	0.954961	Not sig
AC016026.1	0.163187	0.321745	Not sig
VNN3	-0.308068	0.0823514	Not sig
ECHDC1	-0.305119	0.000159775	Not sig
LRRFIP2	0.00870153	0.865057	Not sig
[truncated: 54,270 more rows]
