# Supplementary material for: NamiRNA-mediated high expression of KNSTRN correlates with poor prognosis and tumor immune infiltration of hepatocellular carcinoma
Source: Research Square preprint supplement (doi:10.21203/rs.3.rs-3032233/v1), 2023-06-26
Supplement: Supplementary file 3 [file 3b00d0c1b436887029407b68.xlsx]

## Sheet: Raw
differentially expressed genes (DEGs)
id	baseMean	log2FoldChange	lfcSE	stat	pvalue	padj	gene_name	gene_type
ENSG00000000003.15	5108.24	-0.537017	0.0793265	-6.7697	1.29052e-11	3.12548e-10	TSPAN6	protein_coding
ENSG00000000005.6	3.17429	-1.09467	0.254582	-4.29987	1.70895e-05	0.000101566	TNMD	protein_coding
ENSG00000000419.13	1260.77	0.0580657	0.0482837	1.20259	0.229134	0.335468	DPM1	protein_coding
ENSG00000000457.14	564.364	0.00614186	0.0587218	0.104593	0.916699	0.945105	SCYL3	protein_coding
ENSG00000000460.17	279.289	0.148251	0.112741	1.31497	0.188521	0.28787	C1orf112	protein_coding
ENSG00000000938.13	231.51	0.0689948	0.114102	0.604677	0.545394	0.650832	FGR	protein_coding
ENSG00000000971.16	62071.8	-0.592113	0.117124	-5.05542	4.29438e-07	3.83231e-06	CFH	protein_coding
ENSG00000001036.14	2993.72	-0.0179297	0.0781695	-0.229369	0.818582	0.873033	FUCA2	protein_coding
ENSG00000001084.13	4270.41	-0.398827	0.0898779	-4.43743	9.10388e-06	5.82352e-05	GCLC	protein_coding
ENSG00000001167.14	944.131	0.400561	0.0679778	5.89253	3.80329e-09	5.47066e-08	NFYA	protein_coding
ENSG00000001460.18	188.343	0.245907	0.0821161	2.99463	0.00274776	0.00858172	STPG1	protein_coding
ENSG00000001461.17	467.834	0.14196	0.0637743	2.22597	0.0260162	0.0575553	NIPAL3	protein_coding
ENSG00000001497.18	2100.73	-0.141168	0.0542641	-2.6015	0.00928159	0.0242326	LAS1L	protein_coding
ENSG00000001561.7	811.42	0.235848	0.111381	2.11748	0.0342192	0.0721882	ENPP4	protein_coding
ENSG00000001617.12	1006.87	-0.0963878	0.0697116	-1.38266	0.166768	0.261308	SEMA3F	protein_coding
ENSG00000001626.16	164.378	0.38117	0.326648	1.16691	0.243246	0.351202	CFTR	protein_coding
ENSG00000001629.10	1046.97	0.334964	0.07026	4.76749	1.86531e-06	1.4224e-05	ANKIB1	protein_coding
ENSG00000001630.17	204.808	0.200466	0.166793	1.20189	0.229408	0.335742	CYP51A1	protein_coding
ENSG00000001631.16	188.714	0.0484932	0.0487494	0.994743	0.319861	0.435373	KRIT1	protein_coding
ENSG00000002016.18	241.034	0.154764	0.0652993	2.37007	0.0177847	0.0418886	RAD52	protein_coding
ENSG00000002079.14	4.63552	0.296539	0.165456	1.79225	0.0730927	0.134825	MYH16	transcribed_unitary_pseudogene
ENSG00000002330.14	485.52	-0.192901	0.0739123	-2.60986	0.0090578	0.0237363	BAD	protein_coding
ENSG00000002549.12	5739.2	-0.57654	0.0908468	-6.34628	2.20582e-10	4.16969e-09	LAP3	protein_coding
ENSG00000002586.20	8764.53	-0.150956	0.068197	-2.21353	0.0268614	0.059013	CD99	protein_coding
ENSG00000002586.20_PAR_Y	0						CD99	protein_coding
ENSG00000002587.10	92.0541	0.320741	0.143919	2.22862	0.025839	0.0572329	HS3ST1	protein_coding
ENSG00000002726.21	122.585	0.417292	0.249798	1.67052	0.0948172	0.166131	AOC1	protein_coding
ENSG00000002745.13	4.23778	0.673716	0.21597	3.11949	0.00181166	0.00599821	WNT16	protein_coding
ENSG00000002746.15	27.301	0.347434	0.212258	1.63685	0.101662	0.175646	HECW1	protein_coding
ENSG00000002822.15	34.2262	-0.270152	0.187856	-1.43808	0.150412	0.240771	MAD1L1	protein_coding
ENSG00000002834.18	9588.38	0.252397	0.0652398	3.86875	0.000109393	0.000519668	LASP1	protein_coding
ENSG00000002919.15	956.323	-0.134248	0.0503646	-2.66552	0.00768685	0.0206594	SNX11	protein_coding
ENSG00000002933.9	37473	-0.602259	0.109841	-5.48303	4.18102e-08	4.75768e-07	TMEM176A	protein_coding
ENSG00000003056.8	1228.86	0.330936	0.0844284	3.91972	8.86508e-05	0.000432024	M6PR	protein_coding
ENSG00000003096.14	247.528	0.178423	0.142317	1.2537	0.20995	0.313238	KLHL13	protein_coding
ENSG00000003137.8	128.505	1.46267	0.220003	6.6484	2.96289e-11	6.688e-10	CYP26B1	protein_coding
ENSG00000003147.19	629.157	-0.0899595	0.144948	-0.620634	0.53484	0.641029	ICA1	protein_coding
ENSG00000003249.15	1714.02	-0.319939	0.144003	-2.22175	0.0263003	0.0580574	DBNDD1	protein_coding
ENSG00000003393.15	1368.78	0.201001	0.0562782	3.57156	0.000354865	0.00146057	ALS2	protein_coding
ENSG00000003400.15	606.932	0.118731	0.0599476	1.98057	0.0476393	0.0952842	CASP10	protein_coding
ENSG00000003402.20	2999.39	-0.0633225	0.043789	-1.44608	0.148154	0.237805	CFLAR	protein_coding
ENSG00000003436.16	12264.5	-0.316246	0.124104	-2.54823	0.010827	0.0275795	TFPI	protein_coding
ENSG00000003509.16	515.557	-0.168714	0.0449672	-3.75193	0.000175475	0.000783986	NDUFAF7	protein_coding
ENSG00000003756.17	1476.98	0.123119	0.0437534	2.81393	0.00489392	0.0141047	RBM5	protein_coding
ENSG00000003987.14	153.647	0.852919	0.178251	4.78492	1.71053e-06	1.31775e-05	MTMR7	protein_coding
ENSG00000003989.18	8496.34	-0.00253906	0.151391	-0.0167715	0.986619	0.991298	SLC7A2	protein_coding
ENSG00000004059.11	3205.59	0.0251732	0.0538302	0.467641	0.640041	0.732324	ARF5	protein_coding
ENSG00000004139.14	113.687	0.456647	0.102176	4.46924	7.84992e-06	5.11036e-05	SARM1	protein_coding
ENSG00000004142.12	10349.9	-0.274248	0.0524587	-5.22788	1.71462e-07	1.67894e-06	POLDIP2	protein_coding
ENSG00000004399.13	3863.81	0.041322	0.083141	0.497011	0.619181	0.714373	PLXND1	protein_coding
ENSG00000004455.17	5223.59	-0.160468	0.0547997	-2.92827	0.00340855	0.0103379	AK2	protein_coding
ENSG00000004468.13	238.861	0.690923	0.180121	3.83588	0.000125117	0.00058416	CD38	protein_coding
ENSG00000004478.8	4307.07	0.0107515	0.0682236	0.157592	0.874778	0.914746	FKBP4	protein_coding
ENSG00000004487.17	1783.54	0.204278	0.0546786	3.73597	0.000186993	0.000829117	KDM1A	protein_coding
ENSG00000004534.15	2006.16	0.0818538	0.0514292	1.59158	0.111479	0.188949	RBM6	protein_coding
ENSG00000004660.15	84.6872	-0.203644	0.10823	-1.8816	0.0598909	0.114943	CAMKK1	protein_coding
ENSG00000004700.16	385.143	0.552772	0.101997	5.41949	5.97688e-08	6.5322e-07	RECQL	protein_coding
ENSG00000004766.17	632.689	0.101082	0.0503699	2.0068	0.0447708	0.0904477	VPS50	protein_coding
ENSG00000004776.13	139.911	-0.6254	0.174777	-3.57828	0.000345863	0.00142692	HSPB6	protein_coding
ENSG00000004777.18	263.17	0.789374	0.0857827	9.20202	3.51271e-20	3.35124e-18	ARHGAP33	protein_coding
ENSG00000004779.10	2801.92	-0.515686	0.0704084	-7.32421	2.40307e-13	8.09683e-12	NDUFAB1	protein_coding
ENSG00000004799.8	7536.53	-0.452241	0.175066	-2.58326	0.00978728	0.0253441	PDK4	protein_coding
ENSG00000004809.14	3.34729	0.316857	0.216285	1.465	0.142921	0.231094	SLC22A16	protein_coding
ENSG00000004838.14	30.642	0.575182	0.123857	4.64391	3.41872e-06	2.4324e-05	ZMYND10	protein_coding
ENSG00000004846.16	24.2311	-0.0389281	0.333774	-0.11663	0.907153	0.937951	ABCB5	protein_coding
ENSG00000004848.8	1.82128	-0.60979	0.358368	-1.70158	0.088835	0.157698	ARX	protein_coding
ENSG00000004864.14	5456.99	-0.289202	0.0814484	-3.55074	0.000384148	0.00156616	SLC25A13	protein_coding
ENSG00000004866.22	1416.74	-0.359045	0.0707668	-5.07363	3.90291e-07	3.52579e-06	ST7	protein_coding
ENSG00000004897.12	1790.75	0.238123	0.04127	5.76989	7.93255e-09	1.06474e-07	CDC27	protein_coding
ENSG00000004939.15	5.11528	-1.33306	0.235363	-5.66384	1.48026e-08	1.8685e-07	SLC4A1	protein_coding
ENSG00000004948.16	6.83381	1.58217	0.248488	6.36721	1.92498e-10	3.6934e-09	CALCR	protein_coding
ENSG00000004961.15	949.54	-0.0597957	0.0501929	-1.19132	0.233529	0.340194	HCCS	protein_coding
ENSG00000004975.12	928.15	0.290244	0.0656604	4.42038	9.8529e-06	6.24252e-05	DVL2	protein_coding
ENSG00000005001.10	36.4331	1.68946	0.309872	5.45213	4.97708e-08	5.55733e-07	PRSS22	protein_coding
ENSG00000005007.13	4819.08	0.103792	0.0494227	2.10008	0.035722	0.0748919	UPF1	protein_coding
ENSG00000005020.13	885.868	0.156307	0.103542	1.5096	0.131146	0.215328	SKAP2	protein_coding
ENSG00000005022.6	12742.4	-0.156509	0.0711348	-2.20017	0.0277949	0.0606942	SLC25A5	protein_coding
ENSG00000005059.16	193.709	0.98979	0.128675	7.69216	1.4467e-14	6.00518e-13	MCUB	protein_coding
ENSG00000005073.6	13.839	1.01436	0.337196	3.00821	0.00262789	0.00825588	HOXA11	protein_coding
ENSG00000005075.15	2232.5	-0.494857	0.0858251	-5.76588	8.12315e-09	1.08653e-07	POLR2J	protein_coding
ENSG00000005100.13	683.093	0.00449822	0.0539131	0.0834347	0.933506	0.956526	DHX33	protein_coding
ENSG00000005102.14	30.1949	0.0848906	0.205735	0.412621	0.679885	0.764925	MEOX1	protein_coding
ENSG00000005108.16	236.054	0.374305	0.142069	2.63468	0.0084217	0.0223097	THSD7A	protein_coding
ENSG00000005156.12	916.225	0.155735	0.0515302	3.0222	0.00250947	0.00793435	LIG3	protein_coding
ENSG00000005175.10	803.282	0.155429	0.036756	4.22866	2.35082e-05	0.000134484	RPAP3	protein_coding
ENSG00000005187.12	930.435	-0.689553	0.149317	-4.61806	3.87346e-06	2.72119e-05	ACSM3	protein_coding
ENSG00000005189.20	242.072	0.671705	0.100659	6.67309	2.50465e-11	5.75137e-10	REXO5	protein_coding
ENSG00000005194.15	1531.97	-0.115881	0.057971	-1.99894	0.0456148	0.091911	CIAPIN1	protein_coding
ENSG00000005206.17	1570.74	-0.118219	0.0648458	-1.82308	0.0682913	0.127646	SPPL2B	protein_coding
ENSG00000005238.20	540.159	-0.0855416	0.0611418	-1.39907	0.161792	0.255155	FAM214B	protein_coding
ENSG00000005243.10	957.649	-0.449452	0.112704	-3.98789	6.66634e-05	0.000336297	COPZ2	protein_coding
ENSG00000005249.13	68.5007	0.322707	0.168542	1.9147	0.0555311	0.10815	PRKAR2B	protein_coding
ENSG00000005302.19	639	-0.0105289	0.0414662	-0.253915	0.799561	0.858526	MSL3	protein_coding
ENSG00000005339.15	2674.75	0.130105	0.0553219	2.35178	0.018684	0.0436043	CREBBP	protein_coding
ENSG00000005379.17	270.5	0.385143	0.121598	3.16735	0.00153835	0.00522454	TSPOAP1	protein_coding
ENSG00000005381.8	6.75877	-0.447873	0.201994	-2.21726	0.0266054	0.0585737	MPO	protein_coding
ENSG00000005421.9	14430.2	-0.911577	0.165518	-5.50743	3.64109e-08	4.19442e-07	PON1	protein_coding
ENSG00000005436.14	655.06	-0.113001	0.0547357	-2.06449	0.0389712	0.0804969	GCFC2	protein_coding
ENSG00000005448.17	208.132	0.511619	0.114052	4.48584	7.26264e-06	4.7703e-05	WDR54	protein_coding
ENSG00000005469.12	1671.19	0.00761409	0.100622	0.0756702	0.939682	0.960541	CROT	protein_coding
ENSG00000005471.19	6301.31	-0.856958	0.161757	-5.29781	1.172e-07	1.19328e-06	ABCB4	protein_coding
ENSG00000005483.21	1358.82	0.245712	0.0643957	3.81565	0.000135823	0.000626691	KMT2E	protein_coding
ENSG00000005486.17	4363.8	-0.375838	0.0736797	-5.10097	3.37912e-07	3.09061e-06	RHBDD2	protein_coding
ENSG00000005513.10	13.3538	-0.288584	0.181608	-1.58905	0.112049	0.189739	SOX8	protein_coding
ENSG00000005700.15	3306.48	-0.0190534	0.0646172	-0.294866	0.768096	0.835121	IBTK	protein_coding
ENSG00000005801.18	536.37	0.363162	0.0549801	6.60533	3.96622e-11	8.71358e-10	ZNF195	protein_coding
ENSG00000005810.18	865.49	-0.0228937	0.0718301	-0.318721	0.749938	0.820733	MYCBP2	protein_coding
ENSG00000005812.11	920.361	-0.130948	0.0610382	-2.14535	0.031925	0.0682405	FBXL3	protein_coding
ENSG00000005844.19	1378.86	0.140656	0.108327	1.29844	0.194137	0.294545	ITGAL	protein_coding
ENSG00000005882.12	1407.24	-0.322704	0.0842508	-3.83028	0.000127998	0.000595118	PDK2	protein_coding
ENSG00000005884.18	1032.64	1.18352	0.17293	6.84394	7.70455e-12	1.93094e-10	ITGA3	protein_coding
ENSG00000005889.16	1027.46	0.414943	0.0699103	5.93536	2.93195e-09	4.33837e-08	ZFX	protein_coding
ENSG00000005893.16	16974.5	-0.292296	0.0755935	-3.86668	0.000110325	0.000523234	LAMP2	protein_coding
ENSG00000005961.19	13.2049	0.427075	0.168909	2.52844	0.0114572	0.0289581	ITGA2B	protein_coding
ENSG00000005981.13	116.941	-1.06447	0.207069	-5.14063	2.7382e-07	2.56417e-06	ASB4	protein_coding
ENSG00000006007.12	1272.02	-0.0713479	0.0590777	-1.2077	0.227164	0.333135	GDE1	protein_coding
ENSG00000006015.18	1788.29	-0.508085	0.0913362	-5.5628	2.65477e-08	3.14745e-07	REX1BD	protein_coding
ENSG00000006016.11	46.7208	0.386306	0.198225	1.94883	0.0513162	0.101283	CRLF1	protein_coding
ENSG00000006025.12	183.674	0.631584	0.114239	5.52862	3.22756e-08	3.76959e-07	OSBPL7	protein_coding
ENSG00000006042.12	2228.5	0.325072	0.13583	2.39322	0.0167011	0.0397129	TMEM98	protein_coding
ENSG00000006047.13	231.297	0.188415	0.21739	0.866716	0.386098	0.501779	YBX2	protein_coding
ENSG00000006059.4	0.024975	-0.419383	1.79451	-0.233704	0.815215		KRT33A	protein_coding
ENSG00000006062.17	858.687	0.407924	0.101999	3.99931	6.35287e-05	0.000322408	MAP3K14	protein_coding
ENSG00000006071.15	19.2419	0.500585	0.23581	2.12284	0.0337677	0.0713927	ABCC8	protein_coding
ENSG00000006116.4	0.194451	-0.00138693	0.532787	-0.00260317	0.997923		CACNG3	protein_coding
ENSG00000006118.15	683.352	1.42943	0.172865	8.26903	1.35058e-16	8.15763e-15	TMEM132A	protein_coding
ENSG00000006125.18	4697.83	-0.0530137	0.0555567	-0.954226	0.339969	0.455667	AP2B1	protein_coding
ENSG00000006128.12	1.33644	1.68575	0.533464	3.16	0.00157771	0.00533774	TAC1	protein_coding
ENSG00000006194.10	1063.85	-0.0998885	0.0450518	-2.21719	0.02661	0.0585782	ZNF263	protein_coding
ENSG00000006210.7	1721.28	-0.269309	0.109103	-2.46839	0.0135724	0.033362	CX3CL1	protein_coding
ENSG00000006282.21	2641.84	-0.00119035	0.0808303	-0.0147265	0.98825	0.992417	SPATA20	protein_coding
ENSG00000006283.18	6.12792	0.928779	0.253641	3.66179	0.000250459	0.00107333	CACNA1G	protein_coding
ENSG00000006327.14	2656.17	-0.192939	0.117619	-1.64038	0.100927	0.1747	TNFRSF12A	protein_coding
ENSG00000006377.11	18.5793	1.48615	0.44042	3.37439	0.000739792	0.00277229	DLX6	protein_coding
ENSG00000006432.15	294.679	0.448066	0.0779231	5.75011	8.91878e-09	1.18105e-07	MAP3K9	protein_coding
ENSG00000006451.8	1601.69	0.124614	0.045538	2.73649	0.00620981	0.0172564	RALA	protein_coding
ENSG00000006453.14	2584.57	0.110893	0.108171	1.02517	0.305284	0.41995	BAIAP2L1	protein_coding
ENSG00000006459.11	695.29	0.0040283	0.0738205	0.0545688	0.956482	0.971301	KDM7A	protein_coding
ENSG00000006468.14	392.416	0.200279	0.147568	1.3572	0.174718	0.270938	ETV1	protein_coding
ENSG00000006530.18	765.827	0.0601824	0.0555892	1.08263	0.278973	0.391299	AGK	protein_coding
ENSG00000006534.16	731.54	0.535198	0.114263	4.6839	2.81469e-06	2.04778e-05	ALDH3B1	protein_coding
ENSG00000006555.11	369.952	0.535688	0.118155	4.53379	5.79356e-06	3.90032e-05	TTC22	protein_coding
ENSG00000006576.16	521.061	0.406127	0.0637104	6.37458	1.8346e-10	3.53177e-09	PHTF2	protein_coding
ENSG00000006606.9	16.6564	1.00072	0.234431	4.26871	1.96608e-05	0.000114891	CCL26	protein_coding
ENSG00000006607.14	688.249	0.294999	0.0599503	4.92073	8.62238e-07	7.13936e-06	FARP2	protein_coding
ENSG00000006611.17	710.321	-0.138352	0.325873	-0.424557	0.67116	0.758059	USH1C	protein_coding
ENSG00000006625.18	793.196	-0.102044	0.0824722	-1.23731	0.215971	0.320302	GGCT	protein_coding
ENSG00000006634.8	273.518	0.765637	0.0650784	11.7648	5.92341e-32	1.4102e-29	DBF4	protein_coding
ENSG00000006638.13	146.367	-0.528344	0.104949	-5.03428	4.7966e-07	4.23346e-06	TBXA2R	protein_coding
ENSG00000006652.15	327.417	-0.213445	0.0874632	-2.44039	0.0146712	0.0356094	IFRD1	protein_coding
ENSG00000006659.13	23.0845	6.11018	0.689068	8.86731	7.49343e-19	6.23598e-17	LGALS14	protein_coding
ENSG00000006695.12	543.164	-0.153484	0.0686624	-2.23534	0.0253948	0.0564263	COX10	protein_coding
ENSG00000006704.11	651.638	0.302339	0.0820757	3.68366	0.000229905	0.000994114	GTF2IRD1	protein_coding
ENSG00000006712.15	3262.65	-0.188589	0.0564015	-3.34368	0.000826738	0.003056	PAF1	protein_coding
ENSG00000006715.16	1629.42	-0.0310113	0.0574848	-0.539469	0.589563	0.689655	VPS41	protein_coding
ENSG00000006740.17	164.333	-0.261596	0.191657	-1.36492	0.172279	0.26795	ARHGAP44	protein_coding
ENSG00000006744.19	2587.12	-0.215098	0.0551274	-3.90183	9.54667e-05	0.00046106	ELAC2	protein_coding
ENSG00000006747.15	41.9917	1.55089	0.191505	8.09844	5.56702e-16	3.03253e-14	SCIN	protein_coding
ENSG00000006756.16	2410.87	-0.470042	0.0919432	-5.1123	3.18252e-07	2.92707e-06	ARSD	protein_coding
ENSG00000006757.12	919.852	-0.333245	0.0716693	-4.64975	3.32331e-06	2.37185e-05	PNPLA4	protein_coding
ENSG00000006788.14	4.5587	0.142296	0.369575	0.385027	0.700217	0.781196	MYH13	protein_coding
ENSG00000006831.10	5985.86	-0.107029	0.073429	-1.45759	0.144955	0.233747	ADIPOR2	protein_coding
ENSG00000006837.12	12.3118	0.0258697	0.0786027	0.32912	0.742065	0.814051	CDKL3	protein_coding
ENSG00000007001.13	460.581	-0.455431	0.262557	-1.7346	0.0828113	0.149159	UPP2	protein_coding
ENSG00000007038.11	15.575	2.03558	0.288374	7.05882	1.6792e-12	4.88155e-11	PRSS21	protein_coding
ENSG00000007047.15	2145.05	0.0698962	0.0630199	1.10911	0.267381	0.378392	MARK4	protein_coding
ENSG00000007062.12	134.521	2.00172	0.304385	6.57626	4.82435e-11	1.04395e-09	PROM1	protein_coding
ENSG00000007080.11	2771.24	-0.235507	0.0740911	-3.17862	0.00147978	0.00505598	CCDC124	protein_coding
ENSG00000007129.18	41.288	-0.0304915	0.140043	-0.21773	0.82764	0.879678	CEACAM21	protein_coding
ENSG00000007168.14	2287.95	-0.134562	0.0463489	-2.90324	0.00369324	0.0110661	PAFAH1B1	protein_coding
ENSG00000007171.18	74.4675	-0.569259	0.147465	-3.86029	0.000113252	0.000535426	NOS2	protein_coding
ENSG00000007174.18	4.1069	-0.671043	0.241469	-2.779	0.00545257	0.0154492	DNAH9	protein_coding
ENSG00000007202.15	2613.45	0.0862841	0.0624916	1.38073	0.167361	0.262034	KIAA0100	protein_coding
ENSG00000007216.15	214.62	1.16892	0.247249	4.72771	2.27063e-06	1.69114e-05	SLC13A2	protein_coding
ENSG00000007237.19	312.531	0.612161	0.136975	4.46915	7.85298e-06	5.11043e-05	GAS7	protein_coding
ENSG00000007255.10	1557.77	-0.482971	0.090105	-5.36009	8.318e-08	8.78234e-07	TRAPPC6A	protein_coding
ENSG00000007264.15	141.7	-0.15452	0.125741	-1.22887	0.219121	0.323912	MATK	protein_coding
ENSG00000007306.15	20.4506	2.00741	0.576822	3.48011	0.000501199	0.00197776	CEACAM7	protein_coding
ENSG00000007312.13	92.4624	-0.234596	0.128944	-1.81937	0.0688553	0.128463	CD79B	protein_coding
ENSG00000007314.12	90.1059	-0.58311	0.131592	-4.43121	9.37072e-06	5.9776e-05	SCN4A	protein_coding
ENSG00000007341.19	297.871	0.00198776	0.0487333	0.0407885	0.967465	0.978568	ST7L	protein_coding
ENSG00000007350.17	26.0926	2.48529	0.26863	9.25172	2.20899e-20	2.1735e-18	TKTL1	protein_coding
ENSG00000007372.24	13.3559	0.160578	0.331238	0.484781	0.627831	0.721893	PAX6	protein_coding
ENSG00000007376.8	835.882	-0.0591047	0.0689384	-0.857356	0.391248	0.506833	RPUSD1	protein_coding
ENSG00000007384.15	574.416	0.206612	0.090996	2.27056	0.0231734	0.0522572	RHBDF1	protein_coding
ENSG00000007392.17	883.337	-0.0211055	0.0671993	-0.314074	0.753465	0.823184	LUC7L	protein_coding
ENSG00000007402.12	53.6477	0.0263309	0.142661	0.18457	0.853566	0.899329	CACNA2D2	protein_coding
ENSG00000007516.14	511.618	-0.240258	0.112562	-2.13444	0.0328067	0.0697206	BAIAP3	protein_coding
ENSG00000007520.4	1543.95	-0.294459	0.0660268	-4.45969	8.20783e-06	5.30853e-05	TSR3	protein_coding
ENSG00000007541.17	1530.44	-0.360774	0.0722732	-4.99181	5.98155e-07	5.15803e-06	PIGQ	protein_coding
ENSG00000007545.16	318.512	0.187036	0.0581703	3.21532	0.00130301	0.00452587	CRAMP1	protein_coding
ENSG00000007866.22	1037.07	0.150384	0.0617687	2.43464	0.0149067	0.0360946	TEAD3	protein_coding
ENSG00000007908.16	135.387	-1.37747	0.191807	-7.18152	6.89385e-13	2.15853e-11	SELE	protein_coding
ENSG00000007923.16	850.333	0.180942	0.0783969	2.30803	0.0209976	0.0480883	DNAJC11	protein_coding
ENSG00000007933.13	16504.4	-0.967598	0.160332	-6.03498	1.58984e-09	2.5152e-08	FMO3	protein_coding
ENSG00000007944.15	349.072	0.14393	0.0959903	1.49942	0.133764	0.218838	MYLIP	protein_coding
ENSG00000007952.18	47.7825	0.26202	0.119958	2.18427	0.0289424	0.0628018	NOX1	protein_coding
ENSG00000007968.7	132.599	1.31574	0.119035	11.0534	2.11021e-28	3.96078e-26	E2F2	protein_coding
ENSG00000008018.9	7554.7	-0.332849	0.0776366	-4.28727	1.80878e-05	0.000106783	PSMB1	protein_coding
ENSG00000008056.14	53.8163	-0.134238	0.183639	-0.730987	0.464787	0.577804	SYN1	protein_coding
ENSG00000008083.14	615.827	0.147025	0.0646867	2.27288	0.0230336	0.0519962	JARID2	protein_coding
ENSG00000008086.13	334.598	0.28106	0.0949463	2.9602	0.00307443	0.0094549	CDKL5	protein_coding
ENSG00000008118.10	15.84	-0.454196	0.179558	-2.52952	0.0114217	0.0288835	CAMK1G	protein_coding
ENSG00000008128.23	43.0668	-0.150093	0.087718	-1.71109	0.0870646	0.155233	CDK11A	protein_coding
ENSG00000008130.15	3259.48	-0.243667	0.0683421	-3.56541	0.000363294	0.00149064	NADK	protein_coding
ENSG00000008196.13	0.865365	1.16783	0.527502	2.21388	0.0268371	0.0589709	TFAP2B	protein_coding
ENSG00000008197.5	0.0735234	-0.0603706	1.01141	-0.0596898	0.952403		TFAP2D	protein_coding
ENSG00000008226.20	33.1347	-0.390662	0.118939	-3.28456	0.00102141	0.0036646	DLEC1	protein_coding
ENSG00000008256.16	530.25	0.0342816	0.0864223	0.396676	0.691607	0.774442	CYTH3	protein_coding
ENSG00000008277.14	77.2567	0.428987	0.174484	2.45861	0.0139478	0.0341316	ADAM22	protein_coding
ENSG00000008282.9	3935.22	-0.036593	0.0535486	-0.68336	0.49438	0.605414	SYPL1	protein_coding
ENSG00000008283.16	1648.93	0.121424	0.129521	0.937485	0.348509	0.464284	CYB561	protein_coding
ENSG00000008294.21	2368.34	0.182285	0.0599218	3.04204	0.00234979	0.00749744	SPAG9	protein_coding
ENSG00000008300.17	328.543	0.523924	0.140892	3.71862	0.00020031	0.000880702	CELSR3	protein_coding
ENSG00000008311.15	2454.51	-0.208458	0.170739	-1.22092	0.222117	0.327456	AASS	protein_coding
ENSG00000008323.15	425.147	0.539975	0.146089	3.6962	0.000218853	0.000953532	PLEKHG6	protein_coding
ENSG00000008324.12	775.513	-0.219652	0.0693381	-3.16784	0.00153577	0.00521734	SS18L2	protein_coding
ENSG00000008382.16	1020.49	-0.333482	0.079462	-4.19675	2.70775e-05	0.000151662	MPND	protein_coding
ENSG00000008394.13	28550.9	-0.666968	0.115466	-5.77633	7.63494e-09	1.0304e-07	MGST1	protein_coding
ENSG00000008405.12	633.85	0.298774	0.073102	4.08709	4.36823e-05	0.000231987	CRY1	protein_coding
ENSG00000008438.5	1.95576	-0.517201	0.180474	-2.86578	0.00415977	0.0122704	PGLYRP1	protein_coding
ENSG00000008441.18	2922.41	-0.28106	0.0928845	-3.02591	0.00247883	0.00785259	NFIX	protein_coding
ENSG00000008513.16	7081.38	-0.31851	0.122535	-2.59934	0.00934024	0.0243673	ST3GAL1	protein_coding
ENSG00000008516.17	59.815	-0.088551	0.128264	-0.690383	0.489953	0.601081	MMP25	protein_coding
ENSG00000008517.18	21274.9	-0.847304	0.140275	-6.04031	1.53817e-09	2.44352e-08	IL32	protein_coding
ENSG00000008710.20	946.524	0.430577	0.0981935	4.38498	1.15995e-05	7.19725e-05	PKD1	protein_coding
ENSG00000008735.14	510.828	0.50692	0.18173	2.78941	0.00528047	0.0150331	MAPK8IP2	protein_coding
ENSG00000008838.20	2912.39	0.211028	0.0468261	4.50663	6.58656e-06	4.37204e-05	MED24	protein_coding
ENSG00000008853.17	367.008	0.200177	0.0886512	2.25802	0.0239442	0.0537634	RHOBTB2	protein_coding
ENSG00000008869.12	777.5	0.185665	0.0586298	3.16673	0.00154163	0.00523365	HEATR5B	protein_coding
ENSG00000008952.17	5898.21	-0.204063	0.051885	-3.93299	8.38965e-05	0.000411394	SEC62	protein_coding
ENSG00000008988.11	42734.9	-0.603539	0.102325	-5.89823	3.67425e-09	5.30492e-08	RPS20	protein_coding
ENSG00000009307.16	14982.9	-0.0128494	0.0502753	-0.255581	0.798274	0.857598	CSDE1	protein_coding
ENSG00000009335.18	2985.92	0.101899	0.0622938	1.63578	0.101885	0.175997	UBE3C	protein_coding
ENSG00000009413.16	481.594	0.0964455	0.0766049	1.259	0.208031	0.31106	REV3L	protein_coding
ENSG00000009694.13	271.801	0.596439	0.252154	2.36537	0.018012	0.0423603	TENM1	protein_coding
ENSG00000009709.12	0.29726	-0.804052	0.507214	-1.58523	0.112913		PAX7	protein_coding
ENSG00000009724.17	9102.58	-1.17331	0.160293	-7.31978	2.48371e-13	8.3441e-12	MASP2	protein_coding
ENSG00000009765.15	953.487	-0.42808	0.173237	-2.47106	0.0134713	0.0331703	IYD	protein_coding
ENSG00000009780.16	312.192	-0.0631199	0.0538324	-1.17253	0.240986	0.348697	FAM76A	protein_coding
ENSG00000009790.15	111.194	0.159867	0.130347	1.22648	0.220019	0.325045	TRAF3IP3	protein_coding
ENSG00000009830.12	549.356	0.135031	0.057627	2.34318	0.0191199	0.0443977	POMT2	protein_coding
ENSG00000009844.16	1313.14	0.168291	0.0532893	3.15806	0.00158821	0.00536735	VTA1	protein_coding
ENSG00000009950.16	14699.6	-0.448727	0.108236	-4.14581	3.3861e-05	0.000185446	MLXIPL	protein_coding
ENSG00000009954.11	3084.96	0.280435	0.0469384	5.97452	2.30763e-09	3.50931e-08	BAZ1B	protein_coding
ENSG00000010017.13	1154.49	0.0958832	0.0685721	1.39828	0.162028	0.255411	RANBP9	protein_coding
ENSG00000010030.14	197.598	0.50369	0.155	3.24962	0.00115559	0.00408698	ETV7	protein_coding
ENSG00000010072.16	359.047	0.140853	0.0480484	2.93148	0.00337347	0.010245	SPRTN	protein_coding
ENSG00000010165.20	1718.6	0.00852464	0.0524437	0.162548	0.870874	0.912128	EEF1AKNMT	protein_coding
ENSG00000010219.13	356.127	-0.219828	0.0751714	-2.92436	0.00345169	0.0104504	DYRK4	protein_coding
ENSG00000010244.19	3220.44	0.241846	0.0327642	7.38139	1.56641e-13	5.43148e-12	ZNF207	protein_coding
ENSG00000010256.11	13914.8	-0.482514	0.0678243	-7.11417	1.12591e-12	3.37203e-11	UQCRC1	protein_coding
ENSG00000010270.14	618.731	0.153059	0.070327	2.17639	0.0295264	0.0638564	STARD3NL	protein_coding
ENSG00000010278.15	2358.35	-0.00237226	0.109892	-0.0215871	0.982777	0.988531	CD9	protein_coding
ENSG00000010282.15	3.36842	0.503641	0.241405	2.08629	0.036952	0.076991	HHATL	protein_coding
ENSG00000010292.13	1401.03	1.0737	0.0742548	14.4597	2.17887e-47	1.5357e-44	NCAPD2	protein_coding
ENSG00000010295.20	866.941	-0.093245	0.0621899	-1.49936	0.13378	0.218855	IFFO1	protein_coding
ENSG00000010310.9	48.7696	1.44912	0.189435	7.6497	2.01451e-14	8.18509e-13	GIPR	protein_coding
ENSG00000010318.21	225.712	-0.0904482	0.0791051	-1.14339	0.252876	0.361821	PHF7	protein_coding
ENSG00000010319.7	507.849	-0.26226	0.1163	-2.25503	0.0241314	0.0540749	SEMA3G	protein_coding
ENSG00000010322.16	2680.15	-0.0164181	0.045334	-0.362158	0.717234	0.794942	NISCH	protein_coding
ENSG00000010327.10	2226.63	-0.239892	0.100664	-2.38308	0.0171685	0.0406507	STAB1	protein_coding
ENSG00000010361.14	241.221	-0.0476359	0.115452	-0.412605	0.679896	0.764925	FUZ	protein_coding
ENSG00000010379.16	391.949	-1.41177	0.168666	-8.37021	5.75138e-17	3.64333e-15	SLC6A13	protein_coding
ENSG00000010404.18	84.0559	-0.08783	0.102585	-0.85617	0.391904	0.507453	IDS	protein_coding
ENSG00000010438.17	301.947	0.925072	0.298869	3.09525	0.0019665	0.00643926	PRSS3	protein_coding
ENSG00000010539.12	339.485	-0.00443035	0.0524492	-0.0844692	0.932683	0.955764	ZNF200	protein_coding
ENSG00000010610.10	2163.19	0.0235706	0.115797	0.203552	0.838704	0.887695	CD4	protein_coding
ENSG00000010626.15	161.579	-0.19661	0.0901724	-2.18038	0.0292293	0.0633289	LRRC23	protein_coding
ENSG00000010671.16	139	0.204689	0.122098	1.67644	0.093653	0.164565	BTK	protein_coding
ENSG00000010704.18	1074.16	-0.0637053	0.0853674	-0.746249	0.455517	0.56918	HFE	protein_coding
ENSG00000010803.16	675.576	0.3637	0.0634419	5.7328	9.87841e-09	1.29424e-07	SCMH1	protein_coding
ENSG00000010810.17	959.855	-0.411917	0.0906095	-4.54607	5.46562e-06	3.70046e-05	FYN	protein_coding
ENSG00000010818.10	557.582	0.0566502	0.0751275	0.754054	0.450817	0.564882	HIVEP2	protein_coding
ENSG00000010932.17	250.596	1.68419	0.234686	7.17635	7.15974e-13	2.23368e-11	FMO1	protein_coding
ENSG00000011007.12	2001.62	-0.0592112	0.054492	-1.0866	0.277211	0.389368	ELOA	protein_coding
ENSG00000011009.11	3706.38	-0.236854	0.0618235	-3.83114	0.000127553	0.000593514	LYPLA2	protein_coding
ENSG00000011021.23	597.713	0.172389	0.0683274	2.52298	0.0116365	0.0293192	CLCN6	protein_coding
ENSG00000011028.14	655.846	0.198759	0.151387	1.31292	0.18921	0.288693	MRC2	protein_coding
ENSG00000011052.21	0						NME1-NME2	protein_coding
ENSG00000011083.9	9.2392	-0.329711	0.253062	-1.30288	0.192614	0.292839	SLC6A7	protein_coding
ENSG00000011105.14	3753.88	-0.341264	0.0750336	-4.54815	5.41187e-06	3.66623e-05	TSPAN9	protein_coding
ENSG00000011114.15	667.201	0.212031	0.057299	3.70042	0.000215242	0.000939414	BTBD7	protein_coding
ENSG00000011132.12	723.65	-0.107102	0.0529098	-2.02424	0.0429456	0.0874046	APBA3	protein_coding
ENSG00000011143.19	372.157	0.0227927	0.0574041	0.397057	0.691325	0.774214	MKS1	protein_coding
ENSG00000011198.10	932.391	-0.0171976	0.0665428	-0.258444	0.796065	0.85589	ABHD5	protein_coding
ENSG00000011201.12	65.5758	0.115419	0.170073	0.678647	0.497362	0.608121	ANOS1	protein_coding
ENSG00000011243.18	967.6	0.14689	0.0495782	2.9628	0.00304855	0.009387	AKAP8L	protein_coding
ENSG00000011258.16	712.266	0.172238	0.0613476	2.80757	0.00499166	0.0143481	MBTD1	protein_coding
ENSG00000011260.14	1226.31	0.21153	0.0537049	3.93874	8.19093e-05	0.000402966	UTP18	protein_coding
ENSG00000011275.19	1690.46	0.149882	0.047444	3.15913	0.00158239	0.00535149	RNF216	protein_coding
ENSG00000011295.16	1162.03	-0.254085	0.0699593	-3.6319	0.00028134	0.00118883	TTC19	protein_coding
ENSG00000011304.22	9238.75	0.153128	0.0335513	4.564	5.01892e-06	3.42421e-05	PTBP1	protein_coding
ENSG00000011332.19	7.58672	0.730805	0.155616	4.69622	2.65018e-06	1.94159e-05	DPF1	protein_coding
ENSG00000011347.10	4352.54	0.115134	0.196644	0.585494	0.558216	0.662133	SYT7	protein_coding
ENSG00000011376.12	968.286	0.148487	0.0586091	2.53351	0.0112927	0.0286073	LARS2	protein_coding
ENSG00000011405.13	1372.04	0.186382	0.0645144	2.88899	0.00386479	0.0115134	PIK3C2A	protein_coding
ENSG00000011422.12	309.981	0.551769	0.133563	4.13114	3.60966e-05	0.000196104	PLAUR	protein_coding
ENSG00000011426.11	559.448	1.84672	0.111549	16.5552	1.46816e-61	5.07043e-58	ANLN	protein_coding
ENSG00000011451.21	1986.3	0.0668239	0.0527115	1.26773	0.204894	0.307275	WIZ	protein_coding
ENSG00000011454.18	1118.58	0.117348	0.0528948	2.21852	0.0265193	0.0584287	RABGAP1	protein_coding
ENSG00000011465.18	3336.41	-0.713235	0.213963	-3.33345	0.00085775	0.00315443	DCN	protein_coding
ENSG00000011478.13	886.997	-0.249961	0.0783345	-3.19094	0.00141809	0.00487467	QPCTL	protein_coding
ENSG00000011485.15	1823.64	0.19616	0.0517561	3.79009	0.00015059	0.000685213	PPP5C	protein_coding
ENSG00000011523.14	602.858	-0.0142943	0.0557671	-0.256322	0.797702	0.857134	CEP68	protein_coding
ENSG00000011566.15	1068.67	0.321365	0.0723882	4.43946	9.01841e-06	5.77312e-05	MAP4K3	protein_coding
ENSG00000011590.14	16.3032	0.363431	0.14069	2.5832	0.00978877	0.0253441	ZBTB32	protein_coding
ENSG00000011600.12	1576.64	-0.0659091	0.117481	-0.56102	0.574784	0.676553	TYROBP	protein_coding
ENSG00000011638.11	140.775	0.296094	0.146093	2.02675	0.042688	0.086952	TMEM159	protein_coding
ENSG00000011677.13	44.9872	1.24689	0.435163	2.86533	0.00416579	0.0122808	GABRA3	protein_coding
ENSG00000012048.23	380.981	1.084	0.0824721	13.1438	1.84713e-39	6.44369e-37	BRCA1	protein_coding
ENSG00000012061.16	1662.41	-0.143847	0.0714017	-2.01462	0.0439443	0.0890802	ERCC1	protein_coding
ENSG00000012124.17	81.389	-0.13007	0.160495	-0.810434	0.417691	0.532793	CD22	protein_coding
ENSG00000012171.20	779.997	0.265943	0.181352	1.46644	0.142528	0.230642	SEMA3B	protein_coding
ENSG00000012174.12	1229.7	-0.00807417	0.0608184	-0.132759	0.894384	0.928864	MBTPS2	protein_coding
ENSG00000012211.13	222.345	0.095814	0.052545	1.82347	0.0682328	0.127564	PRICKLE3	protein_coding
ENSG00000012223.13	105.168	-0.289289	0.179582	-1.6109	0.107201	0.183181	LTF	protein_coding
ENSG00000012232.9	1298.58	0.16911	0.0791853	2.13562	0.0327105	0.0695708	EXTL3	protein_coding
ENSG00000012504.15	3142.01	-0.254859	0.0803237	-3.1729	0.00150925	0.00513987	NR1H4	protein_coding
ENSG00000012660.14	5173.43	-0.107896	0.0823806	-1.30972	0.190289	0.289993	ELOVL5	protein_coding
ENSG00000012779.11	342.473	0.598469	0.17325	3.45437	0.000551573	0.00214856	ALOX5	protein_coding
ENSG00000012817.16	686.556	0.0357667	0.292334	0.122349	0.902623	0.934722	KDM5D	protein_coding
ENSG00000012822.16	2138.58	-0.128958	0.0603989	-2.13511	0.0327522	0.0696467	CALCOCO1	protein_coding
ENSG00000012963.15	1003.68	0.208101	0.0466415	4.46171	8.13082e-06	5.26445e-05	UBR7	protein_coding
ENSG00000012983.11	684.063	0.273971	0.0604552	4.53181	5.848e-06	3.93084e-05	MAP4K5	protein_coding
ENSG00000013016.16	261.886	-0.0485948	0.114236	-0.425388	0.670554	0.757485	EHD3	protein_coding
ENSG00000013275.8	5099.85	-0.071532	0.059871	-1.19477	0.232178	0.338833	PSMC4	protein_coding
ENSG00000013288.9	2966.54	-0.152409	0.0685207	-2.22428	0.0261296	0.0577544	MAN2B2	protein_coding
ENSG00000013293.6	11.721	-0.890025	0.262422	-3.39157	0.000694923	0.00262581	SLC7A14	protein_coding
ENSG00000013297.12	110.785	0.405631	0.181054	2.24039	0.0250656	0.0557955	CLDN11	protein_coding
ENSG00000013306.16	8527.07	-0.0474207	0.0621775	-0.762667	0.445662	0.559992	SLC25A39	protein_coding
ENSG00000013364.19	7780.45	-0.149886	0.0913506	-1.64078	0.100844	0.174582	MVP	protein_coding
ENSG00000013374.16	2722.59	-0.147769	0.0483963	-3.05331	0.00226328	0.00727114	NUB1	protein_coding
ENSG00000013375.16	1574.79	0.17389	0.0715592	2.43001	0.0150984	0.0364836	PGM3	protein_coding
ENSG00000013392.8	313.278	-0.0940037	0.0594834	-1.58034	0.11403	0.192412	RWDD2A	protein_coding
ENSG00000013441.16	2092.76	0.0604782	0.0739286	0.818063	0.413321	0.528645	CLK1	protein_coding
ENSG00000013503.10	615.113	0.0851914	0.0514903	1.65451	0.0980234	0.170701	POLR3B	protein_coding
ENSG00000013523.11	911.57	0.194315	0.0796716	2.43895	0.0147299	0.0357215	ANGEL1	protein_coding
ENSG00000013561.18	2128.7	-0.185096	0.05066	-3.65369	0.000258497	0.00110363	RNF14	protein_coding
ENSG00000013563.14	238.315	0.0165872	0.0797992	0.207862	0.835337	0.885325	DNASE1L1	protein_coding
ENSG00000013573.17	564.95	0.710853	0.095371	7.45356	9.08574e-14	3.28915e-12	DDX11	protein_coding
ENSG00000013583.10	2851.83	-0.425457	0.0665769	-6.39046	1.65391e-10	3.21257e-09	HEBP1	protein_coding
ENSG00000013588.9	53.7223	0.750286	0.208305	3.60187	0.000315933	0.00131617	GPRC5A	protein_coding
ENSG00000013619.14	362.689	0.586867	0.146811	3.99742	6.40358e-05	0.000324657	MAMLD1	protein_coding
ENSG00000013725.14	229.885	-0.0175753	0.149797	-0.117327	0.906601	0.937581	CD6	protein_coding
ENSG00000013810.20	1406.25	0.895355	0.10066	8.89481	5.85215e-19	4.97807e-17	TACC3	protein_coding
ENSG00000014123.10	1392.9	-0.0449654	0.069625	-0.645823	0.518394	0.626645	UFL1	protein_coding
ENSG00000014138.9	237.302	0.0435824	0.105775	0.412029	0.680318	0.7653	POLA2	protein_coding
ENSG00000014164.7	1724.43	0.0238812	0.0749535	0.318614	0.750019	0.820753	ZC3H3	protein_coding
ENSG00000014216.16	6023.57	0.237373	0.0576363	4.11846	3.81406e-05	0.000205989	CAPN1	protein_coding
ENSG00000014257.16	13.9719	0.815556	0.232128	3.5134	0.000442417	0.0017711	ACP3	protein_coding
ENSG00000014641.21	8038.71	-0.135339	0.0645233	-2.09753	0.035947	0.0752814	MDH1	protein_coding
ENSG00000014824.14	1779.2	0.0290676	0.0558666	0.520303	0.602852	0.700919	SLC30A9	protein_coding
ENSG00000014914.21	626.347	-0.170037	0.147489	-1.15287	0.248962	0.357408	MTMR11	protein_coding
ENSG00000014919.13	1388.71	-0.25343	0.0463409	-5.46883	4.53023e-08	5.11074e-07	COX15	protein_coding
ENSG00000015133.19	389.506	0.499796	0.115584	4.3241	1.53152e-05	9.23407e-05	CCDC88C	protein_coding
ENSG00000015153.15	535.581	-0.138478	0.0483048	-2.86676	0.00414692	0.0122377	YAF2	protein_coding
ENSG00000015171.20	2092.16	0.00104935	0.0540243	0.0194236	0.984503	0.989754	ZMYND11	protein_coding
ENSG00000015285.11	373.936	-0.0443792	0.0996747	-0.44524	0.656146	0.745834	WAS	protein_coding
ENSG00000015413.9	81.2133	-0.00256537	0.260541	-0.00984633	0.992144	0.994852	DPEP1	protein_coding
ENSG00000015475.19	2303.38	-0.0570265	0.077986	-0.73124	0.464633	0.577692	BID	protein_coding
ENSG00000015479.20	44.2331	0.19918	0.119157	1.67157	0.0946084	0.165858	MATR3	protein_coding
ENSG00000015520.15	2206.54	-0.377614	0.240129	-1.57255	0.115824	0.194784	NPC1L1	protein_coding
ENSG00000015532.10	1447.75	0.0328366	0.0571851	0.574215	0.565822	0.668854	XYLT2	protein_coding
ENSG00000015568.13	0.422292	0.171256	0.239181	0.716011	0.473985	0.586113	RGPD5	protein_coding
ENSG00000015592.16	2.48663	-0.520546	0.271664	-1.91614	0.0553474	0.107853	STMN4	protein_coding
ENSG00000015676.18	3348.15	-0.179413	0.0450892	-3.97906	6.91873e-05	0.000347002	NUDCD3	protein_coding
ENSG00000016082.15	0.901628	1.45956	0.466583	3.12819	0.00175884	0.00584351	ISL1	protein_coding
ENSG00000016391.11	4103.3	-0.323222	0.0845601	-3.82239	0.000132162	0.000612255	CHDH	protein_coding
ENSG00000016402.13	59.6896	2.04279	0.354684	5.75946	8.43853e-09	1.12349e-07	IL20RA	protein_coding
ENSG00000016490.16	1.23596	3.20943	1.03368	3.10486	0.00190366	0.0062632	CLCA1	protein_coding
ENSG00000016602.9	0.658539	-0.406305	0.500151	-0.812364	0.416583	0.531753	CLCA4	protein_coding
ENSG00000016864.18	2578.85	-0.343474	0.0678586	-5.06162	4.15704e-07	3.72322e-06	GLT8D1	protein_coding
ENSG00000017260.20	2184.61	0.223508	0.0500701	4.46391	8.0479e-06	5.22055e-05	ATP2C1	protein_coding
ENSG00000017427.17	338.129	-0.803338	0.180182	-4.45848	8.25424e-06	5.33337e-05	IGF1	protein_coding
ENSG00000017483.15	72.0324	0.176445	0.157399	1.121	0.262287	0.372679	SLC38A5	protein_coding
ENSG00000017797.13	2328.76	0.109619	0.0579599	1.89128	0.0585864	0.112884	RALBP1	protein_coding
ENSG00000018189.13	1000.11	-0.0154865	0.0582821	-0.265716	0.790458	0.85201	RUFY3	protein_coding
ENSG00000018236.15	59.9739	0.313776	0.380088	0.825536	0.409067	0.524622	CNTN1	protein_coding
ENSG00000018280.17	150.171	0.21516	0.139618	1.54106	0.123302	0.204887	SLC11A1	protein_coding
ENSG00000018408.15	1657.1	0.257357	0.101075	2.5462	0.0108902	0.027716	WWTR1	protein_coding
ENSG00000018510.17	1996.22	0.156178	0.0562968	2.77419	0.0055339	0.015636	AGPS	protein_coding
ENSG00000018607.7	0.346699	0.487473	0.361853	1.34716	0.177929		ZNF806	transcribed_unprocessed_pseudogene
ENSG00000018610.15	705.162	-0.0978769	0.0547793	-1.78675	0.0739782	0.136168	CXorf56	protein_coding
ENSG00000018625.15	106.17	-0.274608	0.191101	-1.43698	0.150723	0.241146	ATP1A2	protein_coding
ENSG00000018699.13	694.933	0.078853	0.0459253	1.71698	0.0859823	0.153652	TTC27	protein_coding
ENSG00000018869.17	60.6734	-0.311826	0.123552	-2.52384	0.0116081	0.0292605	ZNF582	protein_coding
ENSG00000019102.12	143.233	-0.0826642	0.219452	-0.376685	0.706408	0.78635	VSIG2	protein_coding
ENSG00000019144.19	597.252	0.347454	0.126762	2.741	0.00612521	0.0170611	PHLDB1	protein_coding
ENSG00000019169.10	162.83	-0.807159	0.251893	-3.20437	0.00135359	0.00467662	MARCO	protein_coding
ENSG00000019186.10	3.06568	1.94657	0.401527	4.84792	1.24766e-06	9.93556e-06	CYP24A1	protein_coding
ENSG00000019485.13	190.306	0.29206	0.0874487	3.33979	0.00083842	0.00309256	PRDM11	protein_coding
ENSG00000019505.8	155.158	0.892201	0.322362	2.7677	0.00564536	0.0159015	SYT13	protein_coding
ENSG00000019549.13	611.592	-0.191946	0.155499	-1.23439	0.217058	0.32151	SNAI2	protein_coding
ENSG00000019582.15	63814.9	-0.0524049	0.132289	-0.39614	0.692001	0.774758	CD74	protein_coding
ENSG00000019991.18	400.459	0.233501	0.19463	1.19972	0.23025	0.336745	HGF	protein_coding
ENSG00000019995.6	543.117	-0.0280703	0.107437	-0.261271	0.793884	0.854423	ZRANB1	protein_coding
ENSG00000020129.16	706.952	0.255895	0.0725004	3.52957	0.00041624	0.00168073	NCDN	protein_coding
ENSG00000020181.18	506.708	0.0303707	0.151127	0.200962	0.840728	0.889319	ADGRA2	protein_coding
ENSG00000020219.9	0.254996	-0.287771	0.363097	-0.792547	0.428042		CCT8L1P	processed_pseudogene
ENSG00000020256.20	580.354	0.248625	0.0459391	5.41206	6.23047e-08	6.78239e-07	ZFP64	protein_coding
ENSG00000020426.11	346.767	-0.0344347	0.0551407	-0.624488	0.532307	0.638702	MNAT1	protein_coding
ENSG00000020577.14	895.986	-0.437646	0.0859572	-5.09144	3.55346e-07	3.23293e-06	SAMD4A	protein_coding
ENSG00000020633.19	231.87	0.102431	0.129407	0.791542	0.428628	0.543452	RUNX3	protein_coding
ENSG00000020922.13	547.832	0.421175	0.0493047	8.5423	1.31582e-17	9.12513e-16	MRE11	protein_coding
ENSG00000021300.14	273.986	2.31618	0.236758	9.7829	1.33338e-22	1.68064e-20	PLEKHB1	protein_coding
ENSG00000021355.13	3432.03	-0.0869161	0.0756021	-1.14965	0.250288	0.359057	SERPINB1	protein_coding
ENSG00000021461.17	194.15	-0.779037	0.214481	-3.6322	0.000281012	0.00118788	CYP3A43	protein_coding
ENSG00000021488.13	748.071	-0.161451	0.12273	-1.3155	0.188343	0.287675	SLC7A9	protein_coding
ENSG00000021574.13	720.911	0.101166	0.0458884	2.20461	0.0274818	0.0601541	SPAST	protein_coding
ENSG00000021645.20	169.58	-0.410021	0.228109	-1.79747	0.0722604	0.133618	NRXN3	protein_coding
ENSG00000021762.20	260.798	0.183356	0.116867	1.56894	0.116663	0.195855	OSBPL5	protein_coding
ENSG00000021776.11	1114.81	0.204792	0.0445946	4.5923	4.38389e-06	3.03959e-05	AQR	protein_coding
ENSG00000021826.17	72597.6	-0.415744	0.208761	-1.99149	0.0464275	0.0932932	CPS1	protein_coding
ENSG00000021852.13	15049.9	-0.747329	0.134228	-5.56762	2.58247e-08	3.07122e-07	C8B	protein_coding
ENSG00000022267.19	870.077	-0.409162	0.124895	-3.27606	0.00105266	0.00376187	FHL1	protein_coding
ENSG00000022277.13	2620.89	-0.0127687	0.0444358	-0.287351	0.773843	0.839418	RTF2	protein_coding
ENSG00000022355.18	0.229981	-0.181179	0.51866	-0.349321	0.726849		GABRA1	protein_coding
ENSG00000022556.16	60.4179	1.89382	0.232106	8.15928	3.37036e-16	1.91445e-14	NLRP2	protein_coding
ENSG00000022567.10	506.584	0.587685	0.164914	3.56359	0.000365821	0.00149959	SLC45A4	protein_coding
ENSG00000022840.16	6005.17	-0.0731526	0.0384392	-1.90307	0.0570309	0.110485	RNF10	protein_coding
ENSG00000022976.15	197.557	-0.0201585	0.0740101	-0.272374	0.785334	0.84789	ZNF839	protein_coding
ENSG00000023041.11	1320.24	0.0479146	0.0490949	0.975958	0.329085	0.444582	ZDHHC6	protein_coding
ENSG00000023171.18	469.658	0.524046	0.195535	2.68006	0.00736083	0.0199196	GRAMD1B	protein_coding
ENSG00000023191.17	6355.54	-0.199567	0.0556132	-3.58847	0.000332621	0.00137838	RNH1	protein_coding
ENSG00000023228.14	4817.3	-0.215831	0.0568194	-3.79853	0.000145554	0.000665456	NDUFS1	protein_coding
ENSG00000023287.13	2716.26	-0.17827	0.0783016	-2.27671	0.0228037	0.0515547	RB1CC1	protein_coding
ENSG00000023318.8	4173.12	-0.260102	0.0522393	-4.97905	6.38958e-07	5.4757e-06	ERP44	protein_coding
ENSG00000023330.15	12838.8	-0.881448	0.117076	-7.52887	5.11823e-14	1.92973e-12	ALAS1	protein_coding
ENSG00000023445.16	3050.18	0.59828	0.160401	3.72991	0.00019155	0.00084682	BIRC3	protein_coding
ENSG00000023516.9	966.478	-0.0937166	0.0734985	-1.27508	0.20228	0.304174	AKAP11	protein_coding
ENSG00000023572.10	1066.07	-0.226804	0.0596336	-3.80329	0.000142789	0.000654376	GLRX2	protein_coding
ENSG00000023608.5	148.622	0.0534724	0.0678286	0.788346	0.430494	0.545098	SNAPC1	protein_coding
ENSG00000023697.13	2109.31	-0.232858	0.0700351	-3.32487	0.000884583	0.00323828	DERA	protein_coding
ENSG00000023734.11	3500.69	0.0234703	0.046021	0.509991	0.610058	0.707171	STRAP	protein_coding
ENSG00000023839.12	7819.67	-0.35113	0.12563	-2.79496	0.00519055	0.0148149	ABCC2	protein_coding
ENSG00000023892.11	306.433	0.12294	0.117608	1.04533	0.295868	0.40974	DEF6	protein_coding
ENSG00000023902.14	1200.51	-0.0891922	0.111675	-0.79868	0.424476	0.539407	PLEKHO1	protein_coding
ENSG00000023909.10	2977.31	0.167971	0.103399	1.6245	0.104269	0.179264	GCLM	protein_coding
ENSG00000024048.11	2031.6	-0.0640389	0.0525407	-1.21884	0.222904	0.32835	UBR2	protein_coding
ENSG00000024422.12	1852.34	-0.380004	0.110005	-3.45444	0.000551445	0.00214855	EHD2	protein_coding
ENSG00000024526.17	226.673	1.78774	0.121149	14.7566	2.78954e-49	2.60377e-46	DEPDC1	protein_coding
ENSG00000024862.18	1129.88	-0.443126	0.0674598	-6.56874	5.07423e-11	1.09459e-09	CCDC28A	protein_coding
ENSG00000025039.15	1538.29	0.171248	0.108602	1.57684	0.114832	0.193434	RRAGD	protein_coding
ENSG00000025156.13	316.748	0.418119	0.0627602	6.66217	2.69817e-11	6.1467e-10	HSF2	protein_coding
ENSG00000025293.17	1065.44	0.162724	0.0400812	4.05986	4.91028e-05	0.000257136	PHF20	protein_coding
ENSG00000025423.11	19922	-0.894604	0.159214	-5.61887	1.92211e-08	2.35983e-07	HSD17B6	protein_coding
ENSG00000025434.19	3025.58	-0.326599	0.064898	-5.0325	4.84123e-07	4.26414e-06	NR1H3	protein_coding
ENSG00000025708.14	4097.2	-0.339147	0.119587	-2.83599	0.00456843	0.0133063	TYMP	protein_coding
ENSG00000025770.19	2095.76	0.163547	0.0701891	2.33009	0.0198013	0.0457429	NCAPH2	protein_coding
ENSG00000025772.8	1344.2	0.082068	0.0597855	1.37271	0.169844	0.265021	TOMM34	protein_coding
ENSG00000025796.14	4441.35	-0.096987	0.0543837	-1.78338	0.0745241	0.136953	SEC63	protein_coding
ENSG00000025800.14	1725.36	0.125638	0.0561183	2.23882	0.0251679	0.0559906	KPNA6	protein_coding
ENSG00000026025.16	7031.32	-0.18906	0.100294	-1.88505	0.0594229	0.11419	VIM	protein_coding
ENSG00000026036.22	32.2147	0.36586	0.120902	3.02607	0.00247752	0.00784987	RTEL1-TNFRSF6B	protein_coding
ENSG00000026103.22	577.559	-0.56922	0.118122	-4.81892	1.44337e-06	1.1306e-05	FAS	protein_coding
ENSG00000026297.16	1074.7	-0.17813	0.113477	-1.56975	0.116473	0.1956	RNASET2	protein_coding
ENSG00000026508.20	2521.46	0.00820141	0.163668	0.0501099	0.960035	0.973548	CD44	protein_coding
ENSG00000026559.14	24.2008	0.429952	0.256322	1.67739	0.0934664	0.164323	KCNG1	protein_coding
ENSG00000026652.15	224.401	0.670091	0.139743	4.79517	1.62539e-06	1.25862e-05	AGPAT4	protein_coding
ENSG00000026751.17	349.6	0.292511	0.175656	1.66525	0.0958635	0.167582	SLAMF7	protein_coding
ENSG00000026950.17	1386.18	-0.0957103	0.0921796	-1.0383	0.299129	0.413328	BTN3A1	protein_coding
ENSG00000027001.10	514.515	-0.227989	0.0727521	-3.13378	0.0017257	0.00575277	MIPEP	protein_coding
ENSG00000027075.15	396.641	-0.24116	0.0907428	-2.65762	0.00786947	0.0210682	PRKCH	protein_coding
ENSG00000027644.5	7.52461	0.754524	0.253108	2.98103	0.00287278	0.00891572	INSRR	protein_coding
ENSG00000027697.15	3750.94	-0.705398	0.100242	-7.03697	1.96466e-12	5.61684e-11	IFNGR1	protein_coding
ENSG00000027847.14	1540.93	-0.262562	0.0656666	-3.99842	6.37677e-05	0.000323437	B4GALT7	protein_coding
ENSG00000027869.12	141.75	0.0493234	0.147859	0.333585	0.738693	0.811641	SH2D2A	protein_coding
ENSG00000028116.18	228.738	0.532015	0.0849141	6.26533	3.72045e-10	6.71314e-09	VRK2	protein_coding
ENSG00000028137.19	2369.42	-0.207052	0.0962058	-2.15218	0.0313836	0.0672914	TNFRSF1B	protein_coding
ENSG00000028203.18	1459.44	0.401385	0.0571424	7.0243	2.1514e-12	6.08523e-11	VEZT	protein_coding
ENSG00000028277.21	112.78	0.107714	0.128538	0.837991	0.402036	0.517622	POU2F2	protein_coding
ENSG00000028310.18	1080.65	0.191119	0.0564214	3.38736	0.000705693	0.00266242	BRD9	protein_coding
ENSG00000028528.15	3737.55	0.0142004	0.0510315	0.278267	0.780807	0.844613	SNX1	protein_coding
ENSG00000028839.10	371.329	0.0949316	0.0672136	1.41239	0.157836	0.250334	TBPL1	protein_coding
ENSG00000029153.14	469.796	0.63939	0.13614	4.69655	2.64591e-06	1.93928e-05	ARNTL2	protein_coding
ENSG00000029363.17	2402.81	0.0663193	0.0418879	1.58326	0.113363	0.19156	BCLAF1	protein_coding
ENSG00000029364.12	4099.69	-0.150645	0.0540482	-2.78724	0.00531597	0.0151254	SLC39A9	protein_coding
ENSG00000029534.21	20.5992	0.514918	0.178661	2.88209	0.00395044	0.0117361	ANK1	protein_coding
ENSG00000029559.7	16.1096	1.19946	0.312177	3.84225	0.00012191	0.000570808	IBSP	protein_coding
ENSG00000029639.11	389.27	-0.317221	0.0737688	-4.30021	1.70638e-05	0.000101449	TFB1M	protein_coding
ENSG00000029725.17	893.738	0.000635205	0.0751968	0.00844724	0.99326	0.99548	RABEP1	protein_coding
ENSG00000029993.15	3029.54	-0.194536	0.119982	-1.62137	0.104938	0.180118	HMGB3	protein_coding
ENSG00000030066.13	1312.54	0.344773	0.0578031	5.9646	2.45234e-09	3.70166e-08	NUP160	protein_coding
ENSG00000030110.13	657.829	0.483357	0.0843044	5.73348	9.83922e-09	1.28959e-07	BAK1	protein_coding
ENSG00000030304.14	6.94348	-0.423362	0.316062	-1.33949	0.180411	0.278279	MUSK	protein_coding
ENSG00000030419.16	103.885	0.174308	0.118922	1.46573	0.142722	0.23089	IKZF2	protein_coding
ENSG00000030582.18	16330.7	0.15696	0.0636765	2.46496	0.0137029	0.0336348	GRN	protein_coding
ENSG00000031003.10	453.6	0.2022	0.0620033	3.26112	0.00110973	0.00394136	FAM13B	protein_coding
ENSG00000031081.11	413.945	-0.142131	0.100576	-1.41317	0.157607	0.250028	ARHGAP31	protein_coding
ENSG00000031691.7	208.784	0.706768	0.0774449	9.12607	7.1029e-20	6.55897e-18	CENPQ	protein_coding
ENSG00000031698.13	5864.1	-0.176129	0.0634683	-2.77507	0.00551892	0.0155975	SARS1	protein_coding
ENSG00000031823.14	1888.22	0.0067528	0.0430582	0.15683	0.875379	0.915163	RANBP3	protein_coding
ENSG00000032219.19	749.06	-0.0107046	0.0731636	-0.14631	0.883676	0.920905	ARID4A	protein_coding
ENSG00000032389.13	876.512	0.177899	0.0573582	3.10154	0.00192515	0.00632367	EIPR1	protein_coding
ENSG00000032444.17	2316.73	-0.227142	0.057262	-3.96671	7.2872e-05	0.000363371	PNPLA6	protein_coding
ENSG00000032742.18	607.497	-0.128134	0.0693387	-1.84795	0.0646096	0.122196	IFT88	protein_coding
ENSG00000033011.13	897.654	-0.164569	0.0568292	-2.89585	0.00378131	0.0112959	ALG1	protein_coding
ENSG00000033030.15	840.411	0.258919	0.0512979	5.04736	4.47955e-07	3.98315e-06	ZCCHC8	protein_coding
ENSG00000033050.9	589.84	-0.127724	0.0736008	-1.73536	0.0826763	0.148947	ABCF2	protein_coding
ENSG00000033100.16	1675.01	0.187835	0.0585581	3.20767	0.00133813	0.0046311	CHPF2	protein_coding
ENSG00000033122.21	30.8724	0.442917	0.127586	3.47152	0.000517515	0.00203263	LRRC7	protein_coding
ENSG00000033170.17	193.393	0.454674	0.119624	3.80085	0.000144199	0.000660121	FUT8	protein_coding
ENSG00000033178.13	1079.73	0.187812	0.0591412	3.17565	0.00149499	0.00509785	UBA6	protein_coding
ENSG00000033327.13	771.402	0.0139466	0.0846549	0.164746	0.869144	0.91073	GAB2	protein_coding
ENSG00000033627.17	3883.93	-0.502102	0.0649766	-7.72743	1.0974e-14	4.68477e-13	ATP6V0A1	protein_coding
ENSG00000033800.14	791.379	0.197801	0.0579266	3.41469	0.000638538	0.00243971	PIAS1	protein_coding
ENSG00000033867.16	307.555	0.431526	0.107178	4.02623	5.66772e-05	0.000291497	SLC4A7	protein_coding
ENSG00000034053.14	96.7247	0.732592	0.184921	3.96164	7.44355e-05	0.000370152	APBA2	protein_coding
ENSG00000034152.19	2648.11	-0.332064	0.0733457	-4.52739	5.97175e-06	4.00467e-05	MAP2K3	protein_coding
ENSG00000034239.11	14.9755	-0.78899	0.219792	-3.58971	0.000331048	0.00137268	EFCAB1	protein_coding
ENSG00000034510.6	23240.5	-0.0300138	0.136469	-0.219932	0.825924	0.878666	TMSB10	protein_coding
ENSG00000034533.12	187.654	0.0976745	0.0441039	2.21465	0.0267843	0.0588849	ASTE1	protein_coding
ENSG00000034677.13	2382.11	0.20188	0.0803554	2.51234	0.0119935	0.0300694	RNF19A	protein_coding
ENSG00000034693.15	453.683	-0.192307	0.0773627	-2.48578	0.0129267	0.0320486	PEX3	protein_coding
ENSG00000034713.8	2442.59	-0.364768	0.0489268	-7.45538	8.96125e-14	3.2509e-12	GABARAPL2	protein_coding
ENSG00000034971.17	1.14985	-1.45896	0.34001	-4.29093	1.77924e-05	0.000105291	MYOC	protein_coding
ENSG00000035115.22	570.671	0.591232	0.157474	3.75447	0.000173708	0.000776892	SH3YL1	protein_coding
ENSG00000035141.8	1693.49	0.156223	0.063109	2.47545	0.0133069	0.0328355	FAM136A	protein_coding
ENSG00000035403.18	1993.86	0.267985	0.0775691	3.45479	0.000550713	0.00214666	VCL	protein_coding
ENSG00000035499.13	259.701	1.93482	0.137618	14.0594	6.74518e-45	3.75728e-42	DEPDC1B	protein_coding
ENSG00000035664.11	581.658	-0.204483	0.119923	-1.70512	0.0881716	0.15681	DAPK2	protein_coding
ENSG00000035681.9	542.121	0.222334	0.077131	2.88255	0.00394472	0.0117221	NSMAF	protein_coding
ENSG00000035687.10	1201.39	0.186233	0.0616064	3.02296	0.00250317	0.00791869	ADSS2	protein_coding
ENSG00000035720.8	9.62859	-0.185934	0.183835	-1.01142	0.311817	0.426813	STAP1	protein_coding
ENSG00000035862.12	3968.49	0.0629702	0.144851	0.434724	0.663763	0.751819	TIMP2	protein_coding
ENSG00000035928.16	2724.54	0.178363	0.0584838	3.04979	0.00229005	0.00734211	RFC1	protein_coding
ENSG00000036054.13	1105.98	0.0436515	0.0535965	0.814447	0.415389	0.530582	TBC1D23	protein_coding
ENSG00000036257.13	1305.3	0.240749	0.0688703	3.49569	0.000472837	0.00187808	CUL3	protein_coding
ENSG00000036448.10	78.0627	-0.716633	0.175062	-4.09359	4.2474e-05	0.000226231	MYOM2	protein_coding
ENSG00000036473.8	4759.52	-0.751557	0.181261	-4.14628	3.37924e-05	0.000185159	OTC	protein_coding
ENSG00000036530.9	33.6922	-0.624866	0.122033	-5.12047	3.04776e-07	2.82419e-06	CYP46A1	protein_coding
ENSG00000036549.13	1164.68	0.116319	0.0492334	2.36261	0.0181469	0.0425936	ZZZ3	protein_coding
ENSG00000036565.15	1.4785	0.158846	0.24608	0.645503	0.518601	0.62683	SLC18A1	protein_coding
ENSG00000036672.16	469.781	-0.394446	0.137368	-2.87145	0.00408596	0.012095	USP2	protein_coding
ENSG00000036828.17	26.1485	0.944726	0.29589	3.19283	0.00140885	0.00484815	CASR	protein_coding
ENSG00000037042.9	446.429	0.286268	0.0680726	4.20534	2.60695e-05	0.000146894	TUBG2	protein_coding
ENSG00000037241.7	937.943	-0.317569	0.0639703	-4.96433	6.89391e-07	5.85702e-06	RPL26L1	protein_coding
ENSG00000037280.16	661.964	-0.500244	0.0931334	-5.37126	7.81863e-08	8.30843e-07	FLT4	protein_coding
ENSG00000037474.15	2343.45	0.0145416	0.0456419	0.318603	0.750028	0.820753	NSUN2	protein_coding
ENSG00000037637.11	797.92	0.0121519	0.0475256	0.255692	0.798188	0.857532	FBXO42	protein_coding
ENSG00000037749.12	324.865	0.293395	0.0965833	3.03774	0.0023836	0.00758941	MFAP3	protein_coding
ENSG00000037757.14	320.28	-0.0122588	0.0667242	-0.183723	0.854231	0.899689	MRI1	protein_coding
ENSG00000037897.17	530.688	-0.0225537	0.0713345	-0.316168	0.751875	0.822045	METTL1	protein_coding
ENSG00000037965.6	8.9734	-0.0244577	0.386816	-0.0632282	0.949585	0.966858	HOXC8	protein_coding
ENSG00000038002.9	1052.26	-0.0671485	0.0931505	-0.72086	0.470996	0.583545	AGA	protein_coding
ENSG00000038210.14	1955.16	-0.172429	0.0798862	-2.15843	0.0308942	0.0663535	PI4K2B	protein_coding
ENSG00000038219.13	987.583	0.245399	0.0782637	3.13553	0.00171542	0.00572568	BOD1L1	protein_coding
ENSG00000038274.17	2541.26	-0.169811	0.0617855	-2.7484	0.00598872	0.0167396	MAT2B	protein_coding
ENSG00000038295.8	15.5147	-0.20363	0.172853	-1.17805	0.238776	0.346384	TLL1	protein_coding
ENSG00000038358.15	856.201	0.283296	0.0849649	3.33428	0.000855215	0.00314645	EDC4	protein_coding
ENSG00000038382.20	1587.7	0.311881	0.0703799	4.4314	9.36242e-06	5.97451e-05	TRIO	protein_coding
ENSG00000038427.16	1504.59	0.275346	0.215702	1.27652	0.201773	0.30357	VCAN	protein_coding
ENSG00000038532.16	1148.62	-0.0343475	0.0608435	-0.564521	0.572399	0.674505	CLEC16A	protein_coding
ENSG00000038945.15	498.631	0.241905	0.11914	2.03042	0.0423141	0.0862975	MSR1	protein_coding
ENSG00000039068.19	7911.08	0.135637	0.12461	1.08849	0.276377	0.388401	CDH1	protein_coding
ENSG00000039123.16	1579.88	0.166611	0.0499807	3.3335	0.00085762	0.00315429	MTREX	protein_coding
ENSG00000039139.9	183.572	-0.387065	0.189161	-2.04622	0.0407343	0.0835739	DNAH5	protein_coding
ENSG00000039319.17	658.919	0.353112	0.0773646	4.56426	5.01248e-06	3.42252e-05	ZFYVE16	protein_coding
ENSG00000039523.20	1289.04	-0.0585948	0.061386	-0.954531	0.339815	0.455531	RIPOR1	protein_coding
ENSG00000039537.14	12185.4	-1.26377	0.159913	-7.90284	2.72616e-15	1.31863e-13	C6	protein_coding
ENSG00000039560.14	2031.65	0.286549	0.0718094	3.99041	6.596e-05	0.000333186	RAI14	protein_coding
ENSG00000039600.11	3.16153	-0.245144	0.189319	-1.29487	0.195364	0.295939	SOX30	protein_coding
ENSG00000039650.12	1265.61	0.0134009	0.0617733	0.216937	0.828257	0.880063	PNKP	protein_coding
ENSG00000039987.7	0.502634	0.507787	0.263718	1.92549	0.0541677	0.105955	BEST2	protein_coding
ENSG00000040199.18	377.436	0.0454953	0.0820083	0.554764	0.579056	0.680398	PHLPP2	protein_coding
ENSG00000040275.17	318.618	0.938913	0.0689603	13.6153	3.25016e-42	1.36887e-39	SPDL1	protein_coding
ENSG00000040341.18	1401.26	-0.128098	0.0611791	-2.09381	0.0362769	0.0758573	STAU2	protein_coding
ENSG00000040487.13	1113.78	0.0198281	0.0737105	0.269	0.787929	0.849921	SLC66A1	protein_coding
ENSG00000040531.16	809.253	-0.21599	0.056102	-3.84996	0.000118138	0.000555253	CTNS	protein_coding
ENSG00000040608.14	452.082	0.0657862	0.133021	0.494554	0.620915	0.715823	RTN4R	protein_coding
ENSG00000040633.13	1266.95	-0.231132	0.0595972	-3.87824	0.000105217	0.000502388	PHF23	protein_coding
ENSG00000040731.10	6.05983	2.80879	0.486115	5.77805	7.55719e-09	1.02211e-07	CDH10	protein_coding
ENSG00000040933.16	551.532	0.284423	0.0611975	4.64761	3.35797e-06	2.39263e-05	INPP4A	protein_coding
ENSG00000041353.10	158.445	1.21073	0.195864	6.18146	6.35118e-10	1.09453e-08	RAB27B	protein_coding
ENSG00000041357.16	4937.57	-0.126497	0.0525518	-2.40709	0.0160802	0.0384696	PSMA4	protein_coding
ENSG00000041515.16	118.245	-0.640646	0.148865	-4.30355	1.68086e-05	0.000100104	MYO16	protein_coding
ENSG00000041802.11	1350.01	0.141597	0.037497	3.77623	0.000159219	0.000718984	LSG1	protein_coding
ENSG00000041880.14	835.89	0.0201831	0.0699879	0.28838	0.773056	0.838855	PARP3	protein_coding
ENSG00000041982.16	940.792	0.503038	0.167646	3.0006	0.00269447	0.00843971	TNC	protein_coding
ENSG00000041988.15	528.956	-0.244598	0.0691744	-3.53596	0.000406297	0.0016452	THAP3	protein_coding
ENSG00000042062.13	90.1692	-0.673487	0.156204	-4.31159	1.62084e-05	9.70479e-05	RIPOR3	protein_coding
ENSG00000042088.14	428.972	0.322929	0.0532447	6.065	1.31957e-09	2.12757e-08	TDP1	protein_coding
ENSG00000042286.15	2277.65	-0.197038	0.0857587	-2.29758	0.0215857	0.0492492	AIFM2	protein_coding
ENSG00000042304.12	0.641963	-0.091074	0.381141	-0.238951	0.811143	0.867403	C2orf83	protein_coding
ENSG00000042317.17	205.575	-0.197484	0.0668643	-2.9535	0.00314193	0.00963161	SPATA7	protein_coding
ENSG00000042429.12	100.052	0.0747903	0.0501999	1.48985	0.136264	0.22216	MED17	protein_coding
ENSG00000042445.14	7011.36	-0.300581	0.085579	-3.51232	0.000444217	0.00177728	RETSAT	protein_coding
ENSG00000042493.16	1545.14	0.465922	0.144996	3.21335	0.00131198	0.00455108	CAPG	protein_coding
ENSG00000042753.12	4080.33	-0.33451	0.0759036	-4.40704	1.04795e-05	6.58034e-05	AP2S1	protein_coding
ENSG00000042781.14	455.476	0.199307	0.194445	1.025	0.305362	0.420024	USH2A	protein_coding
ENSG00000042813.8	0.232488	-0.268043	0.555978	-0.482111	0.629727		ZPBP	protein_coding
ENSG00000042832.12	63.2301	-1.83066	0.200955	-9.1098	8.25361e-20	7.58288e-18	TG	protein_coding
ENSG00000042980.13	115.825	0.892915	0.177386	5.03374	4.81004e-07	4.24316e-06	ADAM28	protein_coding
ENSG00000043039.7	6.77519	1.2457	0.262643	4.74292	2.10659e-06	1.58608e-05	BARX2	protein_coding
ENSG00000043093.15	1371.88	-0.0460281	0.0563742	-0.816474	0.414229	0.529433	DCUN1D1	protein_coding
ENSG00000043143.20	936.379	0.198691	0.0720756	2.75671	0.00583867	0.0163765	JADE2	protein_coding
ENSG00000043355.12	274.123	0.948191	0.203987	4.64829	3.34697e-06	2.38676e-05	ZIC2	protein_coding
ENSG00000043462.13	508.921	0.141734	0.109407	1.29546	0.19516	0.295694	LCP2	protein_coding
ENSG00000043514.17	490.639	0.0856439	0.0513127	1.66906	0.0951054	0.166535	TRIT1	protein_coding
ENSG00000043591.6	25.482	-1.60779	0.197102	-8.15717	3.42953e-16	1.94167e-14	ADRB1	protein_coding
ENSG00000044012.4	123.04	-0.637167	0.238128	-2.67573	0.00745675	0.0201381	GUCA2B	protein_coding
ENSG00000044090.10	1457.54	0.107934	0.0661525	1.63159	0.102766	0.177219	CUL7	protein_coding
ENSG00000044115.21	11885.2	-0.0139291	0.0464853	-0.299646	0.764447	0.83205	CTNNA1	protein_coding
ENSG00000044446.12	1698.73	0.250497	0.0727562	3.44296	0.000575376	0.00222771	PHKA2	protein_coding
ENSG00000044459.15	642.564	0.202613	0.0870872	2.32655	0.019989	0.0460965	CNTLN	protein_coding
ENSG00000044524.11	241.888	-0.261488	0.187882	-1.39177	0.163993	0.258014	EPHA3	protein_coding
ENSG00000044574.8	44027.7	-0.0705225	0.0679725	-1.03752	0.299496	0.413686	HSPA5	protein_coding
ENSG00000046604.13	1702.78	1.31152	0.144574	9.07161	1.17268e-19	1.06298e-17	DSG2	protein_coding
ENSG00000046647.13	468.155	-0.0713783	0.0546175	-1.30688	0.191255	0.291208	GEMIN8	protein_coding
ENSG00000046651.15	758.448	0.269126	0.0572005	4.70495	2.53923e-06	1.87064e-05	OFD1	protein_coding
ENSG00000046653.15	26.8847	0.321673	0.117432	2.73922	0.00615846	0.0171399	GPM6B	protein_coding
ENSG00000046774.10	419.431	0.814347	0.433573	1.87823	0.0603503	0.115664	MAGEC2	protein_coding
ENSG00000046889.19	192.874	-0.38022	0.146964	-2.58717	0.00967675	0.0250992	PREX2	protein_coding
ENSG00000047056.16	580.282	-0.0289075	0.0520794	-0.555067	0.578849	0.680225	WDR37	protein_coding
ENSG00000047188.16	1082.94	0.0222838	0.0609038	0.365886	0.71445	0.79262	YTHDC2	protein_coding
ENSG00000047230.15	830.195	0.0732011	0.0604107	1.21172	0.225618	0.331474	CTPS2	protein_coding
ENSG00000047249.18	1695.55	-0.282046	0.0686793	-4.10671	4.01342e-05	0.000215095	ATP6V1H	protein_coding
ENSG00000047315.17	1742.27	0.325545	0.0739095	4.40465	1.05956e-05	6.64363e-05	POLR2B	protein_coding
ENSG00000047346.12	1062.81	-0.110119	0.074829	-1.47161	0.141126	0.228755	FAM214A	protein_coding
ENSG00000047365.12	397.66	0.492848	0.0997504	4.94081	7.77968e-07	6.51185e-06	ARAP2	protein_coding
ENSG00000047410.14	3556.77	0.417077	0.0679459	6.13838	8.33683e-10	1.39835e-08	TPR	protein_coding
ENSG00000047457.14	30023	-0.0158194	0.148725	-0.106367	0.915291	0.944076	CP	protein_coding
ENSG00000047578.13	563.138	0.182305	0.0697867	2.61232	0.00899306	0.0235935	KATNIP	protein_coding
ENSG00000047579.20	528.929	0.0790656	0.0811752	0.974012	0.33005	0.44552	DTNBP1	protein_coding
ENSG00000047597.7	190.511	0.114465	0.195738	0.584789	0.55869	0.662478	XK	protein_coding
ENSG00000047617.15	54.1517	-1.03397	0.201083	-5.14201	2.71808e-07	2.54948e-06	ANO2	protein_coding
ENSG00000047621.12	392.854	0.134001	0.0456789	2.93353	0.00335127	0.0101847	C12orf4	protein_coding
ENSG00000047634.15	1276.93	0.0875966	0.0841075	1.04148	0.297651	0.411664	SCML1	protein_coding
ENSG00000047644.19	869.834	0.0651462	0.078587	0.828969	0.407122	0.52271	WWC3	protein_coding
ENSG00000047648.23	81.5684	-0.299859	0.109051	-2.74971	0.00596472	0.0166827	ARHGAP6	protein_coding
ENSG00000047662.5	9.68301	-0.00320596	0.0998889	-0.0320952	0.974396	0.983021	FAM184B	protein_coding
ENSG00000047849.21	7697.78	0.0453315	0.0488612	0.927761	0.353532	0.46922	MAP4	protein_coding
ENSG00000047932.14	889.107	0.0277855	0.0534917	0.519436	0.603457	0.70141	GOPC	protein_coding
ENSG00000047936.11	27.8391	-0.0661412	0.278315	-0.237649	0.812153	0.86816	ROS1	protein_coding
ENSG00000048028.11	636.844	0.233301	0.0555348	4.20099	2.65754e-05	0.000149237	USP28	protein_coding
ENSG00000048052.22	86.1748	0.550787	0.140029	3.93338	8.37604e-05	0.00041091	HDAC9	protein_coding
ENSG00000048140.18	1818.78	-0.0963471	0.0610427	-1.57836	0.114484	0.193001	TSPAN17	protein_coding
ENSG00000048162.21	788.005	-0.422637	0.0913841	-4.62484	3.74879e-06	2.63898e-05	NOP16	protein_coding
ENSG00000048342.17	192.271	0.265771	0.0890118	2.9858	0.0028284	0.00880411	CC2D2A	protein_coding
ENSG00000048392.12	1508.52	-0.199111	0.0721717	-2.75885	0.00580052	0.0162907	RRM2B	protein_coding
ENSG00000048405.10	563.547	0.0011422	0.0538866	0.0211964	0.983089	0.988815	ZNF800	protein_coding
ENSG00000048462.11	13.4012	0.404551	0.269871	1.49905	0.13386	0.218974	TNFRSF17	protein_coding
ENSG00000048471.14	537.214	0.290729	0.080662	3.60428	0.000313014	0.00130527	SNX29	protein_coding
ENSG00000048540.15	20.5603	0.468441	0.152901	3.06368	0.0021863	0.00706059	LMO3	protein_coding
ENSG00000048544.6	2014.94	-0.114921	0.048854	-2.35233	0.0186563	0.0435637	MRPS10	protein_coding
ENSG00000048545.16	0.422246	-0.644672	0.314796	-2.0479	0.0405695	0.0832902	GUCA1A	protein_coding
ENSG00000048649.13	939.41	0.0835283	0.0522807	1.59769	0.110112	0.187064	RSF1	protein_coding
ENSG00000048707.15	1769.87	-0.0501338	0.0605279	-0.828277	0.407514	0.523038	VPS13D	protein_coding
ENSG00000048740.18	316.158	0.0106711	0.133564	0.079895	0.936321	0.958524	CELF2	protein_coding
ENSG00000048828.17	6385.94	-0.125321	0.0407091	-3.07845	0.00208082	0.00676041	FAM120A	protein_coding
ENSG00000048991.16	855.834	0.290223	0.0482767	6.01164	1.83652e-09	2.8596e-08	R3HDM1	protein_coding
ENSG00000049089.15	189.175	1.4441	0.173498	8.32343	8.54506e-17	5.33657e-15	COL9A2	protein_coding
ENSG00000049130.16	362.211	0.620266	0.120788	5.13517	2.81883e-07	2.62969e-06	KITLG	protein_coding
ENSG00000049167.15	296.497	0.00372944	0.0483897	0.077071	0.938567	0.959885	ERCC8	protein_coding
ENSG00000049192.15	39.5318	0.785717	0.148937	5.27549	1.32402e-07	1.33119e-06	ADAMTS6	protein_coding
ENSG00000049239.13	10288.8	-0.289177	0.093345	-3.09793	0.00194875	0.00639144	H6PD	protein_coding
ENSG00000049245.13	2319.36	-0.100216	0.0596852	-1.67908	0.0931368	0.163868	VAMP3	protein_coding
ENSG00000049246.14	793.766	0.214498	0.106725	2.00983	0.0444493	0.0899193	PER3	protein_coding
ENSG00000049247.14	15.712	0.861943	0.258214	3.33809	0.000843566	0.00310889	UTS2	protein_coding
ENSG00000049249.9	84.5851	0.0889278	0.19467	0.456812	0.647806	0.738688	TNFRSF9	protein_coding
ENSG00000049283.18	18.6462	1.70247	0.208304	8.17299	3.00835e-16	1.72299e-14	EPN3	protein_coding
ENSG00000049323.16	1005	0.399859	0.136528	2.92877	0.00340309	0.0103231	LTBP1	protein_coding
ENSG00000049449.10	2263.47	-0.584382	0.120656	-4.84339	1.27641e-06	1.01362e-05	RCN1	protein_coding
ENSG00000049540.18	1275.45	-0.89234	0.184694	-4.83145	1.35542e-06	1.06923e-05	ELN	protein_coding
ENSG00000049541.11	1275.2	0.226657	0.065354	3.46814	0.000524073	0.00205651	RFC2	protein_coding
ENSG00000049618.24	1414.51	0.188233	0.0589345	3.19393	0.00140349	0.00483082	ARID1B	protein_coding
ENSG00000049656.14	6433.11	-0.156296	0.0625997	-2.49675	0.0125337	0.0312177	CLPTM1L	protein_coding
ENSG00000049759.19	2769.14	0.0654291	0.0859034	0.761658	0.446264	0.560517	NEDD4L	protein_coding
ENSG00000049768.16	224.896	-0.0182795	0.182603	-0.100105	0.920261	0.94773	FOXP3	protein_coding
ENSG00000049769.14	200.962	-0.47256	0.10951	-4.31523	1.59436e-05	9.56615e-05	PPP1R3F	protein_coding
ENSG00000049860.14	7062.86	-0.174897	0.0657142	-2.66149	0.00777966	0.0208779	HEXB	protein_coding
ENSG00000049883.15	361.402	-0.115955	0.0541025	-2.14325	0.0320932	0.0685321	PTCD2	protein_coding
ENSG00000050030.16	4.63043	-0.299686	0.281777	-1.06356	0.287529	0.400585	NEXMIF	protein_coding
ENSG00000050130.18	1065.25	-0.14654	0.0511944	-2.86243	0.0042041	0.0123784	JKAMP	protein_coding
ENSG00000050165.18	1502.56	-1.07905	0.170081	-6.34436	2.23354e-10	4.21746e-09	DKK3	protein_coding
ENSG00000050327.15	525.004	0.215938	0.100884	2.14045	0.0323183	0.0689064	ARHGEF5	protein_coding
ENSG00000050344.9	233.02	0.917487	0.131804	6.96099	3.37884e-12	9.10231e-11	NFE2L3	protein_coding
ENSG00000050393.11	1778.29	-0.300545	0.0712347	-4.21908	2.45298e-05	0.000139405	MCUR1	protein_coding
ENSG00000050405.13	1209.11	0.313885	0.0814656	3.85298	0.000116689	0.00054934	LIMA1	protein_coding
ENSG00000050426.16	2071.03	-0.137029	0.0510654	-2.6834	0.00728779	0.0197524	LETMD1	protein_coding
ENSG00000050438.17	20.2464	0.530906	0.132979	3.99241	6.54049e-05	0.00033077	SLC4A8	protein_coding
ENSG00000050555.19	845.278	-0.546276	0.167169	-3.26781	0.00108382	0.00386005	LAMC3	protein_coding
ENSG00000050628.20	51.3944	-0.516789	0.162689	-3.17655	0.00149036	0.00508521	PTGER3	protein_coding
ENSG00000050730.16	8.48226	0.962558	0.213763	4.50293	6.70226e-06	4.44364e-05	TNIP3	protein_coding
ENSG00000050748.18	1514.34	0.102852	0.0497318	2.06812	0.0386283	0.0799082	MAPK9	protein_coding
ENSG00000050767.17	62.6741	-1.28492	0.163744	-7.84716	4.25553e-15	1.97274e-13	COL23A1	protein_coding
ENSG00000050820.17	2575.61	0.0232674	0.0690999	0.336722	0.736327	0.809737	BCAR1	protein_coding
ENSG00000051009.11	1564.04	-0.0651604	0.0560637	-1.16226	0.245131	0.353274	FAM160A2	protein_coding
ENSG00000051108.15	5764.62	-0.494517	0.0698543	-7.07926	1.44926e-12	4.26333e-11	HERPUD1	protein_coding
ENSG00000051128.19	232.695	0.528954	0.124132	4.26122	2.03315e-05	0.00011837	HOMER3	protein_coding
ENSG00000051180.17	160.125	1.23818	0.103763	11.9327	7.99287e-33	1.98591e-30	RAD51	protein_coding
ENSG00000051341.14	137.151	1.73059	0.106959	16.1799	6.99352e-59	1.42075e-55	POLQ	protein_coding
ENSG00000051382.9	1230.08	0.196836	0.0522217	3.76923	0.000163752	0.000736757	PIK3CB	protein_coding
ENSG00000051523.11	3161.73	0.309432	0.169221	1.82857	0.0674641	0.126447	CYBA	protein_coding
ENSG00000051596.10	372.418	0.113349	0.0623316	1.81849	0.0689892	0.128678	THOC3	protein_coding
ENSG00000051620.11	2901.24	-0.327838	0.0785122	-4.17563	2.97164e-05	0.000164842	HEBP2	protein_coding
ENSG00000051825.15	509.577	0.347786	0.0720574	4.82652	1.38939e-06	1.09353e-05	MPHOSPH9	protein_coding
ENSG00000052126.14	1055.77	0.129546	0.0741518	1.74703	0.0806313	0.145948	PLEKHA5	protein_coding
ENSG00000052344.16	631.179	0.656365	0.276105	2.37723	0.0174432	0.0411966	PRSS8	protein_coding
ENSG00000052723.12	1016.18	0.0835839	0.0489244	1.70843	0.0875565	0.155941	SIKE1	protein_coding
ENSG00000052749.14	1516.77	0.027451	0.0791941	0.346629	0.72887	0.803866	RRP12	protein_coding
ENSG00000052795.13	1958.98	0.103126	0.119865	0.860356	0.389593	0.505294	FNIP2	protein_coding
ENSG00000052802.13	12310	-0.631424	0.107353	-5.88174	4.05977e-09	5.80332e-08	MSMO1	protein_coding
ENSG00000052841.15	2934.41	-0.0392403	0.0563285	-0.696633	0.486032	0.597353	TTC17	protein_coding
ENSG00000052850.8	1.87518	0.955043	0.249748	3.82403	0.000131286	0.00060852	ALX4	protein_coding
ENSG00000053108.17	109.241	-0.148359	0.215433	-0.688657	0.491039	0.602156	FSTL4	protein_coding
ENSG00000053254.16	2233.53	-0.111808	0.0757597	-1.47582	0.139991	0.227261	FOXN3	protein_coding
ENSG00000053328.8	21.0911	1.10687	0.199164	5.55755	2.73591e-08	3.23586e-07	METTL24	protein_coding
ENSG00000053371.12	2458.85	-0.385803	0.0706011	-5.46454	4.64112e-08	5.21763e-07	AKR7A2	protein_coding
ENSG00000053372.5	1551.31	-0.00351576	0.0689302	-0.0510047	0.959322	0.973243	MRTO4	protein_coding
ENSG00000053438.11	10.5276	0.385741	0.16299	2.36665	0.0179498	0.04224	NNAT	protein_coding
ENSG00000053501.13	1402.71	-0.510488	0.0817191	-6.24685	4.18802e-10	7.49028e-09	USE1	protein_coding
ENSG00000053524.12	54.6679	1.26901	0.211972	5.98666	2.14197e-09	3.27904e-08	MCF2L2	protein_coding
ENSG00000053702.15	134.897	-0.184866	0.0945887	-1.95442	0.0506518	0.100184	NRIP2	protein_coding
ENSG00000053747.17	1397.06	-0.518038	0.183131	-2.82879	0.00467244	0.013558	LAMA3	protein_coding
ENSG00000053770.12	1098.46	-0.106674	0.063133	-1.68968	0.0910896	0.160898	AP5M1	protein_coding
ENSG00000053900.11	766.323	0.12129	0.0492845	2.46101	0.0138547	0.0339399	ANAPC4	protein_coding
ENSG00000053918.18	298.504	0.397563	0.146475	2.7142	0.00664358	0.0182497	KCNQ1	protein_coding
ENSG00000054116.12	1999.14	-0.142411	0.0479824	-2.96799	0.00299754	0.00925097	TRAPPC3	protein_coding
ENSG00000054118.15	4057.26	0.101907	0.0363021	2.80719	0.00499761	0.0143604	THRAP3	protein_coding
ENSG00000054148.18	3054.72	-0.154415	0.0936754	-1.64841	0.0992688	0.172393	PHPT1	protein_coding
ENSG00000054179.12	229.635	0.660424	0.155138	4.25702	2.07173e-05	0.000120332	ENTPD2	protein_coding
ENSG00000054219.11	91.1477	0.178479	0.126608	1.4097	0.158628	0.251313	LY75	protein_coding
ENSG00000054267.22	1376.64	0.0435062	0.0636843	0.683155	0.494509	0.605552	ARID4B	protein_coding
ENSG00000054277.14	165.803	-0.154202	0.11735	-1.31403	0.188836	0.288199	OPN3	protein_coding
ENSG00000054282.16	547.222	0.0630616	0.0528543	1.19312	0.232822	0.339415	SDCCAG8	protein_coding
ENSG00000054356.14	4.13611	0.241859	0.2003	1.20749	0.227244	0.33321	PTPRN	protein_coding
ENSG00000054392.13	440.21	-0.062881	0.106745	-0.589076	0.55581	0.659978	HHAT	protein_coding
ENSG00000054523.18	1978.46	0.0459914	0.0689305	0.667214	0.504635	0.614617	KIF1B	protein_coding
ENSG00000054598.9	203.173	-0.297863	0.162672	-1.83107	0.0670904	0.125905	FOXC1	protein_coding
ENSG00000054611.14	1646.03	-0.168325	0.0581799	-2.89319	0.0038135	0.0113792	TBC1D22A	protein_coding
ENSG00000054654.19	2276.35	0.0911521	0.0925641	0.984745	0.324749	0.440084	SYNE2	protein_coding
ENSG00000054690.14	179.808	0.577277	0.108545	5.3183	1.0474e-07	1.07979e-06	PLEKHH1	protein_coding
ENSG00000054793.14	2293.29	0.182698	0.0990269	1.84494	0.0650468	0.122844	ATP9A	protein_coding
ENSG00000054796.13	0.087391	-0.0604034	1.51308	-0.0399208	0.968156		SPO11	protein_coding
ENSG00000054803.4	110.65	-2.90926	0.294608	-9.87504	5.34138e-23	6.90898e-21	CBLN4	protein_coding
ENSG00000054938.16	379.019	-0.450613	0.17515	-2.57272	0.0100902	0.0259999	CHRDL2	protein_coding
ENSG00000054965.11	1832.18	0.124317	0.0554185	2.24324	0.0248817	0.055461	FAM168A	protein_coding
ENSG00000054967.13	88.3133	0.594974	0.096589	6.15985	7.28152e-10	1.23636e-08	RELT	protein_coding
ENSG00000054983.17	552.691	0.143024	0.119732	1.19454	0.232268	0.338908	GALC	protein_coding
ENSG00000055044.11	1581.11	0.288938	0.0543892	5.31242	1.08181e-07	1.11227e-06	NOP58	protein_coding
ENSG00000055070.17	2917.19	0.00026041	0.0511914	0.00508698	0.995941	0.997264	SZRD1	protein_coding
ENSG00000055118.16	78.7485	1.01604	0.26754	3.79769	0.00014605	0.000667548	KCNH2	protein_coding
ENSG00000055130.17	3224.47	-0.0903767	0.0503244	-1.79588	0.072513	0.133978	CUL1	protein_coding
ENSG00000055147.19	796.507	-0.169027	0.0474475	-3.56239	0.000367491	0.00150518	FAM114A2	protein_coding
ENSG00000055163.20	2103.16	-0.472037	0.152816	-3.08893	0.00200882	0.00655671	CYFIP2	protein_coding
ENSG00000055208.19	2267.66	-0.0332589	0.0743635	-0.447248	0.654696	0.744675	TAB2	protein_coding
ENSG00000055211.14	1143.31	-0.27012	0.0528623	-5.10988	3.22369e-07	2.95863e-06	GINM1	protein_coding
ENSG00000055332.18	1645.7	0.127709	0.057792	2.2098	0.0271189	0.0594917	EIF2AK2	protein_coding
ENSG00000055483.19	1738.66	0.101554	0.0537173	1.89052	0.0586878	0.113042	USP36	protein_coding
ENSG00000055609.19	1723.48	0.173631	0.0704472	2.4647	0.013713	0.0336571	KMT2C	protein_coding
ENSG00000055732.13	105.601	2.05866	0.279762	7.35862	1.85824e-13	6.36036e-12	MCOLN3	protein_coding
ENSG00000055813.6	6.17387	-0.0738019	0.180488	-0.408903	0.682611	0.767254	CCDC85A	protein_coding
ENSG00000055917.16	4127.82	0.132594	0.0414077	3.20216	0.00136402	0.00470795	PUM2	protein_coding
ENSG00000055950.16	2262.19	-0.348135	0.0592696	-5.87374	4.26068e-09	6.06041e-08	MRPL43	protein_coding
ENSG00000055955.17	835.207	-1.21964	0.139201	-8.7617	1.92321e-18	1.50272e-16	ITIH4	protein_coding
ENSG00000055957.11	76788	-0.662724	0.132341	-5.00768	5.5089e-07	4.78991e-06	ITIH1	protein_coding
ENSG00000056050.7	629.717	-0.0333415	0.0564547	-0.590588	0.554796	0.659121	HPF1	protein_coding
ENSG00000056097.16	2533.78	0.190413	0.0464193	4.10202	4.09555e-05	0.000218987	ZFR	protein_coding
ENSG00000056277.16	109.72	0.139876	0.0760609	1.839	0.0659151	0.124091	ZNF280C	protein_coding
ENSG00000056291.17	65.9086	0.595285	0.378359	1.57333	0.115642	0.194516	NPFFR2	protein_coding
ENSG00000056487.16	1.37028	1.12068	0.348504	3.21568	0.00130137	0.00452063	PHF21B	protein_coding
ENSG00000056558.11	401.162	0.11832	0.0785977	1.50538	0.132226	0.216732	TRAF1	protein_coding
ENSG00000056586.16	1325.1	-0.0159542	0.049918	-0.319608	0.749266	0.820101	RC3H2	protein_coding
ENSG00000056736.10	2442.87	0.204019	0.119345	1.70949	0.0873598	0.155663	IL17RB	protein_coding
ENSG00000056972.20	547.952	-0.114635	0.088688	-1.29256	0.196163	0.296992	TRAF3IP2	protein_coding
ENSG00000056998.20	1138.19	-0.461724	0.125667	-3.67418	0.000238617	0.0010278	GYG2	protein_coding
ENSG00000057019.16	1023.54	0.268805	0.0672091	3.99953	6.3469e-05	0.000322158	DCBLD2	protein_coding
ENSG00000057149.16	2.30976	1.62667	0.606098	2.68384	0.00727821	0.0197315	SERPINB3	protein_coding
ENSG00000057252.13	1587.13	0.36863	0.0638375	5.7745	7.71806e-09	1.04033e-07	SOAT1	protein_coding
ENSG00000057294.15	1163.29	-0.0998233	0.110725	-0.901546	0.367298	0.482889	PKP2	protein_coding
ENSG00000057468.7	6.78697	0.56964	0.195519	2.91348	0.00357427	0.0107668	MSH4	protein_coding
ENSG00000057593.14	7833.45	-0.396045	0.12308	-3.21779	0.00129181	0.00449283	F7	protein_coding
ENSG00000057608.17	9833.32	-0.152604	0.0434944	-3.5086	0.000450466	0.00179957	GDI2	protein_coding
ENSG00000057657.17	223.238	-0.0580077	0.111381	-0.520804	0.602504	0.700655	PRDM1	protein_coding
ENSG00000057663.16	1060.08	-0.130106	0.0480395	-2.70831	0.00676268	0.0185332	ATG5	protein_coding
ENSG00000057704.13	424.713	0.271909	0.0925009	2.93953	0.00328712	0.0100153	TMCC3	protein_coding
ENSG00000057757.10	1517.26	-0.150498	0.0565996	-2.65899	0.00783759	0.0210024	PITHD1	protein_coding
ENSG00000057935.14	929.339	0.352008	0.0573739	6.13533	8.49845e-10	1.4227e-08	MTA3	protein_coding
ENSG00000058056.9	791.43	0.220441	0.06928	3.18188	0.00146323	0.00500685	USP13	protein_coding
ENSG00000058063.16	1184.14	0.400892	0.0753029	5.32372	1.01664e-07	1.05216e-06	ATP11B	protein_coding
ENSG00000058085.15	247.745	1.80037	0.243694	7.38782	1.49258e-13	5.19634e-12	LAMC2	protein_coding
ENSG00000058091.17	1163.97	0.148602	0.0901491	1.6484	0.09927	0.172393	CDK14	protein_coding
ENSG00000058262.10	17621.3	0.0635103	0.0547922	1.15911	0.24641	0.354625	SEC61A1	protein_coding
ENSG00000058272.19	1017.93	0.349986	0.0552006	6.34027	2.29367e-10	4.32156e-09	PPP1R12A	protein_coding
ENSG00000058335.16	78.8549	-1.88667	0.233368	-8.08449	6.24248e-16	3.36334e-14	RASGRF1	protein_coding
ENSG00000058404.20	194.73	-0.996238	0.236044	-4.22057	2.4369e-05	0.000138742	CAMK2B	protein_coding
ENSG00000058453.17	582.925	0.191269	0.0768861	2.4877	0.0128572	0.0319038	CROCC	protein_coding
ENSG00000058600.16	1043.27	-0.0188505	0.0460554	-0.409301	0.682319	0.767051	POLR3E	protein_coding
ENSG00000058668.15	3011.84	-0.248377	0.106133	-2.34024	0.0192713	0.044686	ATP2B4	protein_coding
ENSG00000058673.17	3.18093	0.387151	0.136515	2.83596	0.00456876	0.0133063	ZC3H11A	protein_coding
ENSG00000058729.11	754.33	-0.148861	0.0453169	-3.28489	0.00102022	0.00366069	RIOK2	protein_coding
ENSG00000058799.15	1832.3	-0.264388	0.0525228	-5.03377	4.80932e-07	4.24316e-06	YIPF1	protein_coding
ENSG00000058804.12	938.808	0.516604	0.0558878	9.24359	2.3836e-20	2.33201e-18	NDC1	protein_coding
ENSG00000058866.15	107.931	0.133801	0.147116	0.909493	0.36309	0.478668	DGKG	protein_coding
ENSG00000059122.17	1105.83	-0.118388	0.0602689	-1.96433	0.0494917	0.0982834	FLYWCH1	protein_coding
ENSG00000059145.19	368.221	0.111643	0.0895003	1.24741	0.212248	0.315971	UNKL	protein_coding
ENSG00000059377.18	329.306	-0.0208203	0.107929	-0.192907	0.847032	0.894231	TBXAS1	protein_coding
ENSG00000059378.13	2148.91	-0.0956088	0.0749852	-1.27503	0.202297	0.304185	PARP12	protein_coding
ENSG00000059573.9	2758.91	0.218366	0.0745031	2.93096	0.00337915	0.0102572	ALDH18A1	protein_coding
ENSG00000059588.10	1494.1	0.353607	0.0826202	4.27991	1.86967e-05	0.000109908	TARBP1	protein_coding
ENSG00000059691.12	1153.48	-0.385452	0.0688804	-5.59596	2.19402e-08	2.65589e-07	GATB	protein_coding
ENSG00000059728.11	509.947	0.528521	0.0863822	6.1184	9.45173e-10	1.56784e-08	MXD1	protein_coding
ENSG00000059758.8	726.004	0.162903	0.057469	2.83462	0.00458797	0.0133511	CDK17	protein_coding
ENSG00000059769.20	876.297	-0.377389	0.0847205	-4.45452	8.40802e-06	5.42259e-05	DNAJC25	protein_coding
ENSG00000059804.16	643.062	0.167815	0.137074	1.22427	0.22085	0.325994	SLC2A3	protein_coding
ENSG00000059915.17	83.9515	-0.214851	0.124542	-1.72513	0.0845049	0.15149	PSD	protein_coding
ENSG00000060069.17	962.675	-0.00272187	0.0461183	-0.0590193	0.952937	0.969128	CTDP1	protein_coding
ENSG00000060138.13	1530.18	0.104546	0.138182	0.756584	0.449299	0.563435	YBX3	protein_coding
ENSG00000060140.9	6.47585	1.29479	0.214973	6.02302	1.71188e-09	2.68978e-08	STYK1	protein_coding
ENSG00000060237.18	5018.42	0.38596	0.0604813	6.38147	1.75397e-10	3.38977e-09	WNK1	protein_coding
ENSG00000060303.5	0.663485	0.0343276	0.240284	0.142862	0.886399	0.922763	RPS17P5	processed_pseudogene
ENSG00000060339.14	1766.8	0.246189	0.0477216	5.15886	2.48465e-07	2.34774e-06	CCAR1	protein_coding
ENSG00000060491.16	3670.52	-0.0356223	0.0647621	-0.550048	0.582287	0.683351	OGFR	protein_coding
ENSG00000060558.4	120.184	0.0440932	0.119513	0.368942	0.712171	0.790802	GNA15	protein_coding
ENSG00000060566.14	12292.3	-0.350412	0.139036	-2.5203	0.0117256	0.0295113	CREB3L3	protein_coding
ENSG00000060642.11	985.931	-0.406903	0.074925	-5.43081	5.61004e-08	6.18411e-07	PIGV	protein_coding
ENSG00000060656.20	1136.15	-0.194851	0.133721	-1.45714	0.145077	0.233835	PTPRU	protein_coding
ENSG00000060688.13	862.285	0.210335	0.0530177	3.96727	7.27008e-05	0.000362622	SNRNP40	protein_coding
ENSG00000060709.15	8.29339	-2.19731	0.382443	-5.74547	9.16636e-09	1.20966e-07	RIMBP2	protein_coding
ENSG00000060718.22	73.8949	1.32759	0.284738	4.66248	3.12427e-06	2.24324e-05	COL11A1	protein_coding
ENSG00000060749.16	829.404	0.527532	0.0555155	9.50242	2.05059e-21	2.31435e-19	QSER1	protein_coding
ENSG00000060762.19	3559.45	-0.505319	0.0967524	-5.22281	1.76231e-07	1.72221e-06	MPC1	protein_coding
ENSG00000060971.19	7390.67	-0.651152	0.0985314	-6.60858	3.88035e-11	8.55759e-10	ACAA1	protein_coding
ENSG00000060982.15	283.552	0.684155	0.126472	5.40952	6.31935e-08	6.86652e-07	BCAT1	protein_coding
ENSG00000061273.18	1269.23	0.222547	0.0871258	2.55431	0.0106398	0.0271786	HDAC7	protein_coding
ENSG00000061337.15	246.278	0.0371528	0.117915	0.31508	0.752701	0.822557	LZTS1	protein_coding
ENSG00000061455.11	30.6513	-0.413657	0.149902	-2.75952	0.00578871	0.0162628	PRDM6	protein_coding
ENSG00000061492.12	0.185909	-0.15393	0.833174	-0.184752	0.853424		WNT8A	protein_coding
ENSG00000061656.10	312.494	-0.0219412	0.138815	-0.15806	0.874409	0.914543	SPAG4	protein_coding
ENSG00000061676.15	3715.3	0.292682	0.0580334	5.04334	4.57468e-07	4.06043e-06	NCKAP1	protein_coding
ENSG00000061794.13	3247.18	-0.0696869	0.048773	-1.4288	0.153061	0.244073	MRPS35	protein_coding
ENSG00000061918.14	331.801	0.306398	0.113483	2.69994	0.00693512	0.0189262	GUCY1B1	protein_coding
ENSG00000061936.10	1295.48	0.245477	0.0440886	5.56782	2.57951e-08	3.06919e-07	SFSWAP	protein_coding
ENSG00000061938.20	1499.56	-0.0801846	0.0739571	-1.0842	0.278274	0.390559	TNK2	protein_coding
ENSG00000061987.16	1376.67	0.17855	0.0543708	3.28394	0.00102368	0.00367083	MON2	protein_coding
ENSG00000062038.14	20.1371	0.16379	0.207341	0.789958	0.429553	0.544225	CDH3	protein_coding
ENSG00000062096.15	121.207	-0.815751	0.329634	-2.47472	0.0133342	0.0328913	ARSF	protein_coding
ENSG00000062194.16	2885.84	0.0197892	0.0372259	0.531597	0.595005	0.694351	GPBP1	protein_coding
ENSG00000062282.15	5957.97	-0.114985	0.134266	-0.856398	0.391778	0.507309	DGAT2	protein_coding
ENSG00000062370.17	75.8773	0.538542	0.0984166	5.47207	4.44815e-08	5.02687e-07	ZNF112	protein_coding
ENSG00000062485.19	3778.65	0.14067	0.0630342	2.23164	0.0256388	0.0568733	CS	protein_coding
ENSG00000062524.16	62.096	0.161856	0.176407	0.917516	0.358872	0.47463	LTK	protein_coding
ENSG00000062582.14	4.52108	0.0415354	0.115698	0.358999	0.719596	0.796537	MRPS24	protein_coding
ENSG00000062598.18	813.747	0.177072	0.0476776	3.71395	0.000204045	0.000895072	ELMO2	protein_coding
ENSG00000062650.19	1794.43	0.154802	0.0440781	3.51199	0.000444757	0.00177924	WAPL	protein_coding
ENSG00000062716.13	6750.79	-0.0312855	0.0611841	-0.511334	0.609117	0.706278	VMP1	protein_coding
ENSG00000062725.10	1042.87	0.12242	0.0539144	2.27064	0.0231685	0.0522562	APPBP2	protein_coding
ENSG00000062822.15	771.41	0.789771	0.0683722	11.5511	7.29207e-31	1.59392e-28	POLD1	protein_coding
ENSG00000063015.20	154.568	1.8834	0.311855	6.03933	1.54755e-09	2.45279e-08	SEZ6	protein_coding
ENSG00000063046.18	9364.16	0.0423779	0.0586746	0.722253	0.470139	0.582922	EIF4B	protein_coding
ENSG00000063127.16	181.296	-0.403709	0.120668	-3.34562	0.000820993	0.00303915	SLC6A16	protein_coding
ENSG00000063169.11	573.141	0.0949294	0.0504644	1.88111	0.0599564	0.11503	BICRA	protein_coding
ENSG00000063176.16	750.291	0.178046	0.088607	2.00939	0.0444959	0.0899767	SPHK2	protein_coding
ENSG00000063177.13	27692.2	-0.356214	0.0945287	-3.76832	0.000164353	0.000739074	RPL18	protein_coding
ENSG00000063180.9	97.2793	0.0805553	0.137961	0.583901	0.559287	0.66299	CA11	protein_coding
ENSG00000063241.8	6794.5	-0.779609	0.0877118	-8.8883	6.20495e-19	5.23946e-17	ISOC2	protein_coding
ENSG00000063244.13	4427.92	0.214557	0.0395274	5.42805	5.69734e-08	6.26834e-07	U2AF2	protein_coding
ENSG00000063245.15	9123.91	-0.354332	0.0576406	-6.14726	7.88309e-10	1.32676e-08	EPN1	protein_coding
ENSG00000063322.15	2880.33	-0.0833015	0.0460848	-1.80757	0.0706737	0.131316	MED29	protein_coding
ENSG00000063438.19	2.09971	-0.866901	0.24063	-3.60263	0.000315012	0.00131281	AHRR	protein_coding
ENSG00000063515.3	0.250867	-0.371289	0.37701	-0.984826	0.32471		GSC2	protein_coding
ENSG00000063587.15	1309.76	-0.132057	0.0846205	-1.56057	0.118624	0.198571	ZNF275	protein_coding
ENSG00000063601.17	885.056	0.164083	0.0606495	2.70543	0.00682154	0.0186634	MTMR1	protein_coding
ENSG00000063660.9	2735.02	-0.119913	0.134151	-0.893864	0.371395	0.486965	GPC1	protein_coding
ENSG00000063761.16	413.88	-0.325372	0.0591067	-5.50483	3.69526e-08	4.24832e-07	ADCK1	protein_coding
ENSG00000063854.13	8129.84	-0.710486	0.0994899	-7.14129	9.2462e-13	2.8259e-11	HAGH	protein_coding
ENSG00000063978.16	1707.7	0.162981	0.0483568	3.37038	0.000750653	0.00280873	RNF4	protein_coding
ENSG00000064012.22	931.183	0.298283	0.0578939	5.15223	2.57411e-07	2.42206e-06	CASP8	protein_coding
ENSG00000064042.18	630.805	0.24606	0.148359	1.65854	0.0972093	0.169557	LIMCH1	protein_coding
ENSG00000064102.15	723.992	0.243039	0.0575355	4.22415	2.39839e-05	0.00013691	INTS13	protein_coding
ENSG00000064115.11	3443.48	-0.145456	0.0821039	-1.77161	0.0764598	0.139856	TM7SF3	protein_coding
ENSG00000064195.7	5.94038	0.781671	0.350775	2.22841	0.0258531	0.0572531	DLX3	protein_coding
ENSG00000064199.7	38.7471	0.401801	0.105949	3.79238	0.000149208	0.000679758	SPA17	protein_coding
ENSG00000064201.16	36.0093	-0.0630906	0.128552	-0.490778	0.623583	0.718324	TSPAN32	protein_coding
ENSG00000064205.10	77.437	-0.743096	0.230375	-3.2256	0.0012571	0.0043869	CCN5	protein_coding
ENSG00000064218.5	0.673631	0.978639	0.444437	2.20197	0.0276671	0.0604875	DMRT3	protein_coding
ENSG00000064225.12	1135.3	-0.661541	0.118129	-5.60018	2.14134e-08	2.59942e-07	ST3GAL6	protein_coding
ENSG00000064270.13	13.4225	1.32604	0.243822	5.43857	5.37087e-08	5.95851e-07	ATP2C2	protein_coding
ENSG00000064300.9	477.748	-0.633336	0.180339	-3.51192	0.000444887	0.00177934	NGFR	protein_coding
ENSG00000064309.14	132.623	0.164713	0.123107	1.33796	0.18091	0.278887	CDON	protein_coding
ENSG00000064313.12	878.369	0.24289	0.0807622	3.00748	0.00263427	0.00827367	TAF2	protein_coding
ENSG00000064393.16	3377.65	-0.0821686	0.0922293	-0.890917	0.372974	0.488547	HIPK2	protein_coding
ENSG00000064419.13	2119.98	0.113218	0.0461507	2.45321	0.0141587	0.0345597	TNPO3	protein_coding
ENSG00000064489.23	0.535004	0.352212	0.268606	1.31126	0.189769	0.28938	BORCS8-MEF2B	protein_coding
ENSG00000064490.14	1032.28	0.0713391	0.0719552	0.991438	0.321472	0.436825	RFXANK	protein_coding
ENSG00000064545.15	2604.29	-0.335317	0.0670175	-5.00343	5.63201e-07	4.88711e-06	TMEM161A	protein_coding
ENSG00000064547.14	228.36	0.857326	0.158035	5.42489	5.79888e-08	6.36182e-07	LPAR2	protein_coding
ENSG00000064601.20	10005.5	-0.00207154	0.0753538	-0.0274909	0.978068	0.985545	CTSA	protein_coding
ENSG00000064607.17	2178.68	0.379732	0.0542927	6.99417	2.66836e-12	7.35469e-11	SUGP2	protein_coding
ENSG00000064651.14	1061.29	0.561286	0.141861	3.95659	7.60282e-05	0.000377365	SLC12A2	protein_coding
ENSG00000064652.11	480.027	-0.0147646	0.0582924	-0.253286	0.800047	0.858877	SNX24	protein_coding
ENSG00000064655.19	50.0519	0.0927197	0.205723	0.450701	0.652205	0.742649	EYA2	protein_coding
ENSG00000064666.15	2265.42	0.238618	0.0897447	2.65886	0.00784063	0.0210089	CNN2	protein_coding
ENSG00000064687.13	603.499	0.154066	0.105129	1.4655	0.142785	0.230938	ABCA7	protein_coding
ENSG00000064692.20	137.302	0.187071	0.176175	1.06185	0.288305	0.401504	SNCAIP	protein_coding
ENSG00000064703.12	467.01	0.23833	0.044788	5.32128	1.03038e-07	1.06479e-06	DDX20	protein_coding
ENSG00000064726.10	1483.77	-0.0140684	0.0502809	-0.279796	0.779634	0.843873	BTBD1	protein_coding
ENSG00000064763.11	129.068	0.806385	0.117548	6.86004	6.88392e-12	1.74043e-10	FAR2	protein_coding
ENSG00000064787.13	160.383	0.786311	0.237645	3.30877	0.000937074	0.00340446	BCAS1	protein_coding
ENSG00000064835.11	2.02125	-0.055036	0.170759	-0.322302	0.747224	0.818333	POU1F1	protein_coding
ENSG00000064886.14	37.1938	0.368236	0.199633	1.84457	0.0651002	0.122918	CHI3L2	protein_coding
ENSG00000064932.16	1930.68	0.0984103	0.0620805	1.5852	0.11292	0.190952	SBNO2	protein_coding
ENSG00000064933.18	375.58	0.231445	0.045916	5.0406	4.64067e-07	4.11371e-06	PMS1	protein_coding
ENSG00000064961.19	2235.81	-0.163614	0.0561686	-2.91291	0.00358073	0.0107815	HMG20B	protein_coding
ENSG00000064989.13	888.269	-0.294668	0.121015	-2.43498	0.0148928	0.0360635	CALCRL	protein_coding
ENSG00000064995.18	1030.67	0.00429509	0.0546127	0.0786463	0.937314	0.959129	TAF11	protein_coding
ENSG00000064999.15	861.018	0.125556	0.0624767	2.00965	0.0444681	0.0899414	ANKS1A	protein_coding
ENSG00000065000.19	6885.46	0.0947052	0.0554309	1.70853	0.0875385	0.155925	AP3D1	protein_coding
ENSG00000065029.15	1436.83	-0.0852003	0.051892	-1.64188	0.100615	0.174283	ZNF76	protein_coding
ENSG00000065054.14	9943.53	-0.774973	0.093627	-8.27724	1.26062e-16	7.67846e-15	SLC9A3R2	protein_coding
ENSG00000065057.9	1611.46	-0.575492	0.0978581	-5.88088	4.08095e-09	5.82877e-08	NTHL1	protein_coding
ENSG00000065060.17	788.385	0.459056	0.0675487	6.79592	1.07622e-11	2.63979e-10	UHRF1BP1	protein_coding
ENSG00000065135.12	2706.21	0.112027	0.0432732	2.58883	0.00963014	0.0250009	GNAI3	protein_coding
ENSG00000065150.21	4406.83	0.34668	0.067804	5.11298	3.17112e-07	2.91814e-06	IPO5	protein_coding
ENSG00000065154.12	3269.1	-0.775317	0.212514	-3.64832	0.000263965	0.00112408	OAT	protein_coding
ENSG00000065183.16	1118.18	0.206461	0.0702706	2.93808	0.0033025	0.0100554	WDR3	protein_coding
ENSG00000065243.20	1166.86	0.177382	0.0610964	2.90332	0.00369232	0.0110645	PKN2	protein_coding
ENSG00000065268.11	1823.94	-0.164318	0.0680223	-2.41565	0.015707	0.0377335	WDR18	protein_coding
ENSG00000065308.5	1185.46	-0.0503274	0.0697142	-0.721911	0.470349	0.583141	TRAM2	protein_coding
ENSG00000065320.9	720.3	-0.106754	0.141195	-0.756076	0.449604	0.563647	NTN1	protein_coding
ENSG00000065325.13	17.6686	0.106777	0.25455	0.419475	0.674869	0.76093	GLP2R	protein_coding
ENSG00000065328.17	184.635	1.66283	0.119285	13.94	3.62027e-44	1.86612e-41	MCM10	protein_coding
ENSG00000065357.20	281.244	0.391969	0.113459	3.45471	0.000550884	0.00214708	DGKA	protein_coding
ENSG00000065361.16	10203.9	0.133367	0.0828048	1.61062	0.107262	0.183258	ERBB3	protein_coding
ENSG00000065371.17	1.24358	0.549614	0.309948	1.77324	0.0761886	0.139456	ROPN1	protein_coding
ENSG00000065413.20	375.862	0.0546068	0.0808143	0.675708	0.499226	0.609835	ANKRD44	protein_coding
ENSG00000065427.15	4590.81	-0.223917	0.0570925	-3.92201	8.78127e-05	0.000428348	KARS1	protein_coding
ENSG00000065457.10	501.378	-0.0624106	0.0592562	-1.05323	0.292234	0.405781	ADAT1	protein_coding
ENSG00000065485.20	2760.41	-0.148523	0.0733832	-2.02394	0.0429762	0.0874422	PDIA5	protein_coding
ENSG00000065491.8	416.109	0.2977	0.0612627	4.8594	1.1774e-06	9.43013e-06	TBC1D22B	protein_coding
ENSG00000065518.8	4140.57	-0.13179	0.0533647	-2.46962	0.0135258	0.0332664	NDUFB4	protein_coding
ENSG00000065526.12	2188.31	0.278349	0.0650007	4.28225	1.85014e-05	0.000108917	SPEN	protein_coding
ENSG00000065534.19	2976.63	-0.31988	0.119603	-2.67451	0.00748377	0.0201937	MYLK	protein_coding
ENSG00000065548.18	2268.13	0.0605247	0.0417375	1.45013	0.147023	0.236324	ZC3H15	protein_coding
ENSG00000065559.15	870.217	-0.128622	0.055533	-2.31614	0.0205505	0.0472273	MAP2K4	protein_coding
ENSG00000065600.13	211.607	0.344572	0.0660834	5.2142	1.84616e-07	1.79857e-06	PACC1	protein_coding
ENSG00000065609.14	2.61128	1.88098	0.388354	4.84345	1.27601e-06	1.01362e-05	SNAP91	protein_coding
ENSG00000065613.15	1807.41	0.0847688	0.0554084	1.52989	0.126044	0.208469	SLK	protein_coding
ENSG00000065615.14	467.199	0.079977	0.062124	1.28738	0.197963	0.299154	CYB5R4	protein_coding
ENSG00000065618.21	17.8303	-0.20302	0.178143	-1.13964	0.254435	0.363662	COL17A1	protein_coding
ENSG00000065621.15	415.811	0.148457	0.153844	0.964982	0.334554	0.450008	GSTO2	protein_coding
ENSG00000065665.21	312.822	0.0279743	0.0742494	0.376761	0.706351	0.786312	SEC61A2	protein_coding
ENSG00000065675.15	48.3541	0.255243	0.148229	1.72195	0.0850787	0.15229	PRKCQ	protein_coding
ENSG00000065717.15	674.188	-0.11932	0.115087	-1.03678	0.299839	0.414028	TLE2	protein_coding
ENSG00000065802.12	702.567	0.0758131	0.0674612	1.1238	0.261096	0.371354	ASB1	protein_coding
ENSG00000065809.13	4542.07	-0.16778	0.0695424	-2.41263	0.0158378	0.0379895	FAM107B	protein_coding
ENSG00000065833.9	1331.94	0.245006	0.165555	1.47991	0.138898	0.225719	ME1	protein_coding
ENSG00000065882.16	1839	0.182105	0.0749703	2.42903	0.0151393	0.036568	TBC1D1	protein_coding
ENSG00000065883.16	1728.3	0.110013	0.0473599	2.32291	0.0201839	0.0464838	CDK13	protein_coding
ENSG00000065911.13	208.619	0.285105	0.123871	2.30162	0.0213568	0.0487945	MTHFD2	protein_coding
ENSG00000065923.10	648.808	0.253308	0.088297	2.86881	0.00412015	0.0121743	SLC9A7	protein_coding
ENSG00000065970.9	608.977	0.0223645	0.0590136	0.378972	0.704708	0.784863	FOXJ2	protein_coding
ENSG00000065978.19	12327.1	0.0947819	0.0610673	1.55209	0.120641	0.201263	YBX1	protein_coding
ENSG00000065989.16	387.113	0.48038	0.13184	3.64365	0.000268795	0.00114254	PDE4A	protein_coding
ENSG00000066027.12	5208.55	-0.0972532	0.0670153	-1.45121	0.146721	0.23596	PPP2R5A	protein_coding
ENSG00000066032.18	385.25	-1.85468	0.376671	-4.92388	8.48439e-07	7.04029e-06	CTNNA2	protein_coding
ENSG00000066044.15	2606.78	0.0208988	0.0407012	0.513469	0.607623	0.705066	ELAVL1	protein_coding
ENSG00000066056.14	1119.51	-0.531674	0.0954054	-5.57279	2.50699e-08	2.99589e-07	TIE1	protein_coding
ENSG00000066084.13	1660.39	0.426981	0.0512511	8.33116	8.00555e-17	5.00869e-15	DIP2B	protein_coding
ENSG00000066117.15	1673.56	0.47854	0.0454731	10.5236	6.72613e-26	1.07543e-23	SMARCD1	protein_coding
ENSG00000066135.13	616.374	0.0725724	0.0520141	1.39524	0.162942	0.256607	KDM4A	protein_coding
ENSG00000066136.20	1979.08	0.0333207	0.0460952	0.722866	0.469762	0.582643	NFYC	protein_coding
ENSG00000066185.13	121.279	-0.871912	0.137594	-6.33683	2.34542e-10	4.41424e-09	ZMYND12	protein_coding
ENSG00000066230.12	93.7792	-0.553738	0.222239	-2.49163	0.0127159	0.0316121	SLC9A3	protein_coding
ENSG00000066248.15	1579.29	-0.247433	0.0783438	-3.1583	0.00158692	0.0053639	NGEF	protein_coding
ENSG00000066279.18	950.844	1.49031	0.114104	13.061	5.50356e-39	1.88189e-36	ASPM	protein_coding
ENSG00000066294.15	261.923	0.275896	0.130069	2.12116	0.0339086	0.0716468	CD84	protein_coding
ENSG00000066322.15	2565.91	0.120048	0.0537624	2.23293	0.0255538	0.0567213	ELOVL1	protein_coding
ENSG00000066336.12	578.27	0.229826	0.113602	2.02309	0.0430643	0.0875791	SPI1	protein_coding
ENSG00000066379.15	487.131	-0.337096	0.0865101	-3.8966	9.75516e-05	0.000469749	POLR1H	protein_coding
ENSG00000066382.16	67.0808	-0.676564	0.163822	-4.12988	3.62958e-05	0.000197124	MPPED2	protein_coding
ENSG00000066405.13	12.6614	2.19339	0.247611	8.85821	8.13068e-19	6.69506e-17	CLDN18	protein_coding
ENSG00000066422.5	667.537	0.256282	0.0459136	5.58184	2.37987e-08	2.85882e-07	ZBTB11	protein_coding
ENSG00000066427.24	546.768	-0.199451	0.0523516	-3.80984	0.000139055	0.000639724	ATXN3	protein_coding
ENSG00000066455.13	2387.81	-0.105677	0.0514283	-2.05485	0.0398934	0.0821317	GOLGA5	protein_coding
ENSG00000066468.23	2902.35	0.584949	0.220132	2.65727	0.00787762	0.0210868	FGFR2	protein_coding
ENSG00000066557.6	521.221	0.123993	0.0710433	1.74531	0.0809308	0.146395	LRRC40	protein_coding
ENSG00000066583.12	2240.74	-0.1503	0.0732563	-2.0517	0.0401989	0.0826572	ISOC1	protein_coding
ENSG00000066629.18	235.472	0.0682437	0.104694	0.651839	0.514505	0.623329	EML1	protein_coding
ENSG00000066651.20	493.462	0.0486056	0.0757635	0.641543	0.52117	0.628947	TRMT11	protein_coding
ENSG00000066654.14	1184.99	0.0740535	0.0508362	1.45671	0.145197	0.233996	THUMPD1	protein_coding
ENSG00000066697.15	495.226	0.23948	0.0671974	3.56383	0.000365478	0.00149836	MSANTD3	protein_coding
ENSG00000066735.14	102.955	-0.158975	0.14292	-1.11234	0.265993	0.376808	KIF26A	protein_coding
ENSG00000066739.12	1322.29	0.0581852	0.0681998	0.853159	0.393571	0.509078	ATG2B	protein_coding
ENSG00000066777.9	1881.31	0.0408891	0.0613657	0.666319	0.505207	0.615162	ARFGEF1	protein_coding
ENSG00000066813.14	13040.2	-0.994776	0.154113	-6.45483	1.0834e-10	2.18426e-09	ACSM2B	protein_coding
ENSG00000066827.16	363.294	0.145458	0.061224	2.37583	0.0175096	0.0413253	ZFAT	protein_coding
ENSG00000066855.16	1974.09	-0.304811	0.0751434	-4.05638	4.98385e-05	0.000260397	MTFR1	protein_coding
ENSG00000066923.17	153.624	-0.422196	0.126524	-3.33689	0.000847213	0.00312133	STAG3	protein_coding
ENSG00000066926.12	1413.84	-0.230892	0.0680123	-3.39485	0.000686661	0.00259885	FECH	protein_coding
ENSG00000066933.16	258.006	0.047576	0.102044	0.466232	0.64105	0.733235	MYO9A	protein_coding
ENSG00000067048.17	941.804	0.0921216	0.290221	0.317419	0.750926	0.821345	DDX3Y	protein_coding
ENSG00000067057.18	699.281	0.45516	0.177133	2.5696	0.0101817	0.0261946	PFKP	protein_coding
ENSG00000067064.11	6594.59	-0.254118	0.0932131	-2.72621	0.00640667	0.0177207	IDI1	protein_coding
ENSG00000067066.17	2890.82	-0.250009	0.0581065	-4.3026	1.68807e-05	0.000100516	SP100	protein_coding
ENSG00000067082.15	5810.58	-0.222165	0.0983402	-2.25915	0.0238739	0.0536267	KLF6	protein_coding
ENSG00000067113.17	2136.28	-0.51953	0.104	-4.99549	5.86875e-07	5.06961e-06	PLPP1	protein_coding
ENSG00000067141.17	1352.09	0.446052	0.0826909	5.39421	6.8825e-08	7.41404e-07	NEO1	protein_coding
ENSG00000067167.8	12594.7	-0.11784	0.0715006	-1.64809	0.0993337	0.172495	TRAM1	protein_coding
ENSG00000067177.15	153.982	0.235681	0.138266	1.70455	0.0882788	0.156976	PHKA1	protein_coding
ENSG00000067182.8	6536.82	-0.300743	0.055402	-5.42837	5.68703e-08	6.25899e-07	TNFRSF1A	protein_coding
ENSG00000067191.16	55.6961	0.685586	0.10908	6.28518	3.27483e-10	5.9683e-09	CACNB1	protein_coding
ENSG00000067208.14	825.421	0.0328349	0.0639754	0.513243	0.607781	0.705107	EVI5	protein_coding
ENSG00000067221.14	919.078	-0.218548	0.0679016	-3.21861	0.00128814	0.00448326	STOML1	protein_coding
ENSG00000067225.18	8702.39	1.03893	0.150217	6.91618	4.6399e-12	1.21766e-10	PKM	protein_coding
ENSG00000067248.10	1445.34	-0.0613573	0.0463844	-1.3228	0.185902	0.284904	DHX29	protein_coding
ENSG00000067334.14	1981.01	0.00764272	0.0468074	0.16328	0.870298	0.911712	DNTTIP2	protein_coding
ENSG00000067365.15	388.21	-0.0914664	0.0554571	-1.64932	0.0990824	0.172151	METTL22	protein_coding
ENSG00000067369.14	438.24	0.600218	0.0933141	6.43223	1.25742e-10	2.50008e-09	TP53BP1	protein_coding
ENSG00000067445.21	460.68	-0.135168	0.149858	-0.901977	0.367069	0.482661	TRO	protein_coding
ENSG00000067533.6	954.882	-0.00434533	0.057276	-0.0758665	0.939525	0.96041	RRP15	protein_coding
ENSG00000067560.13	13986.6	0.0443813	0.0382328	1.16082	0.245716	0.353881	RHOA	protein_coding
ENSG00000067596.12	1633.03	0.148866	0.0422439	3.52397	0.00042513	0.00171182	DHX8	protein_coding
ENSG00000067601.8	51.8496	0.0233579	0.0672401	0.34738	0.728306	0.803372	PMS2P4	transcribed_unprocessed_pseudogene
ENSG00000067606.17	358.544	0.109412	0.112419	0.973258	0.330425	0.445886	PRKCZ	protein_coding
ENSG00000067646.12	163.26	0.145985	0.286908	0.508823	0.610876	0.707913	ZFY	protein_coding
ENSG00000067704.10	6558.32	-0.0711944	0.0636192	-1.11907	0.263109	0.373582	IARS2	protein_coding
ENSG00000067715.14	205.505	0.911966	0.230966	3.94849	7.86456e-05	0.000388793	SYT1	protein_coding
ENSG00000067798.16	304.225	0.875423	0.211454	4.14001	3.47292e-05	0.00018957	NAV3	protein_coding
ENSG00000067829.19	2323.58	-0.417253	0.0713477	-5.84817	4.97009e-09	6.95209e-08	IDH3G	protein_coding
ENSG00000067836.13	491.085	-0.415777	0.0857288	-4.84991	1.23514e-06	9.84425e-06	ROGDI	protein_coding
ENSG00000067840.12	97.4688	-0.723079	0.14401	-5.02102	5.13966e-07	4.49603e-06	PDZD4	protein_coding
ENSG00000067842.17	2.91114	-0.815651	0.274836	-2.96778	0.00299962	0.00925616	ATP2B3	protein_coding
ENSG00000067900.8	1410.8	0.260024	0.0613215	4.24033	2.23189e-05	0.000128275	ROCK1	protein_coding
ENSG00000067955.15	916.825	0.227479	0.0603785	3.76755	0.000164857	0.000741247	CBFB	protein_coding
ENSG00000067992.16	668.778	0.364169	0.0945146	3.85305	0.000116657	0.000549267	PDK3	protein_coding
ENSG00000068001.14	1950.28	-0.133641	0.0578074	-2.31184	0.0207867	0.0476813	HYAL2	protein_coding
ENSG00000068024.17	455.117	0.066112	0.0763945	0.865402	0.386818	0.502526	HDAC4	protein_coding
ENSG00000068028.17	950.776	0.0638432	0.0546684	1.16783	0.242876	0.350823	RASSF1	protein_coding
ENSG00000068078.20	3717	0.441119	0.130542	3.37914	0.000727133	0.00273286	FGFR3	protein_coding
ENSG00000068079.8	2402.71	-0.269358	0.0971429	-2.7728	0.00555767	0.0156929	IFI35	protein_coding
ENSG00000068097.15	490.35	0.274077	0.050996	5.37448	7.68043e-08	8.17415e-07	HEATR6	protein_coding
ENSG00000068120.15	4357.02	-0.124037	0.059598	-2.08123	0.0374126	0.0777847	COASY	protein_coding
ENSG00000068137.15	986.488	0.165639	0.0779525	2.12487	0.0335975	0.0711069	PLEKHH3	protein_coding
ENSG00000068305.17	1090.78	0.126006	0.0786283	1.60256	0.109033	0.185614	MEF2A	protein_coding
ENSG00000068308.14	2615.88	-0.261354	0.039621	-6.59636	4.21376e-11	9.21599e-10	OTUD5	protein_coding
ENSG00000068323.17	2057.26	0.148402	0.0471435	3.14788	0.00164461	0.0055266	TFE3	protein_coding
ENSG00000068354.16	591.836	-0.113025	0.0467893	-2.41562	0.0157083	0.037734	TBC1D25	protein_coding
ENSG00000068366.20	14115.9	0.0704859	0.188498	0.373934	0.708453	0.78784	ACSL4	protein_coding
ENSG00000068383.19	673.147	0.0641613	0.0649414	0.987988	0.323158	0.438501	INPP5A	protein_coding
ENSG00000068394.11	1190.91	-0.106036	0.0526122	-2.01543	0.0438597	0.0889452	GPKOW	protein_coding
ENSG00000068400.13	1968.64	-0.0295823	0.040706	-0.72673	0.467391	0.580349	GRIPAP1	protein_coding
ENSG00000068438.15	929.385	0.143142	0.053311	2.68504	0.00725207	0.0196746	FTSJ1	protein_coding
ENSG00000068489.13	415.846	1.28251	0.116004	11.0557	2.05744e-28	3.88283e-26	PRR11	protein_coding
ENSG00000068615.19	103.348	0.477861	0.191439	2.49615	0.0125551	0.0312664	REEP1	protein_coding
ENSG00000068650.18	1916.09	0.514157	0.0895235	5.74326	9.2871e-09	1.22326e-07	ATP11A	protein_coding
ENSG00000068654.16	1663.34	0.188326	0.0486266	3.8729	0.000107548	0.000511818	POLR1A	protein_coding
ENSG00000068697.7	11741.7	-0.262306	0.0478474	-5.48212	4.20248e-08	4.77739e-07	LAPTM4A	protein_coding
ENSG00000068724.17	1405.11	0.0707353	0.0776347	0.91113	0.362227	0.477895	TTC7A	protein_coding
ENSG00000068745.15	1914.75	0.254507	0.054879	4.63759	3.52487e-06	2.50072e-05	IP6K2	protein_coding
ENSG00000068781.21	0.597893	-1.55776	0.450731	-3.45608	0.000548091	0.00213813	STON1-GTF2A1L	protein_coding
ENSG00000068784.13	513.902	0.00111785	0.0532505	0.0209924	0.983252	0.988893	SRBD1	protein_coding
ENSG00000068796.19	584.617	0.459157	0.0548773	8.36697	5.91193e-17	3.73262e-15	KIF2A	protein_coding
ENSG00000068831.19	299.85	-0.691896	0.139601	-4.95623	7.18751e-07	6.08104e-06	RASGRP2	protein_coding
ENSG00000068878.15	3342.69	0.0199639	0.0442933	0.45072	0.652191	0.742649	PSME4	protein_coding
ENSG00000068885.15	236.307	0.722	0.0872108	8.27879	1.24428e-16	7.61924e-15	IFT80	protein_coding
ENSG00000068903.20	2526.3	-0.177611	0.0553444	-3.20919	0.0013311	0.00460952	SIRT2	protein_coding
ENSG00000068912.14	2632.09	0.0161775	0.0471493	0.343112	0.731514	0.805933	ERLEC1	protein_coding
ENSG00000068971.14	638.896	-0.0487894	0.0559948	-0.871321	0.383579	0.499257	PPP2R5B	protein_coding
ENSG00000068976.14	26.957	-0.266611	0.114083	-2.33699	0.0194395	0.0450217	PYGM	protein_coding
ENSG00000068985.5	42.9726	1.71403	0.48734	3.5171	0.000436281	0.00174897	PAGE1	protein_coding
ENSG00000069011.16	257.983	1.30602	0.276094	4.73035	2.24128e-06	1.6716e-05	PITX1	protein_coding
ENSG00000069018.19	1.5035	1.68655	0.306595	5.50092	3.7781e-08	4.33202e-07	TRPC7	protein_coding
ENSG00000069020.18	966.975	-0.0329644	0.100007	-0.329621	0.741686	0.813713	MAST4	protein_coding
ENSG00000069122.19	873.247	-0.357756	0.0943206	-3.79298	0.000148852	0.000678287	ADGRF5	protein_coding
ENSG00000069188.17	124.303	-0.57315	0.246641	-2.32382	0.020135	0.0463836	SDK2	protein_coding
ENSG00000069206.15	0.169975	-0.133943	0.641618	-0.208759	0.834636		ADAM7	protein_coding
ENSG00000069248.12	1579.43	0.108947	0.0515798	2.1122	0.0346693	0.0729596	NUP133	protein_coding
ENSG00000069275.13	15241.6	-0.0368474	0.0560117	-0.657852	0.510633	0.62002	NUCKS1	protein_coding
ENSG00000069329.18	2809.63	0.139799	0.0557422	2.50795	0.0121433	0.0303834	VPS35	protein_coding
ENSG00000069345.12	2889.62	-0.330482	0.063735	-5.18525	2.1572e-07	2.07235e-06	DNAJA2	protein_coding
ENSG00000069399.15	3050.43	-0.183792	0.0944011	-1.94692	0.0515438	0.101645	BCL3	protein_coding
ENSG00000069424.15	1348.93	-0.660494	0.156328	-4.22506	2.38874e-05	0.000136427	KCNAB2	protein_coding
ENSG00000069431.11	1144.31	-0.633463	0.154246	-4.10682	4.01142e-05	0.000215022	ABCC9	protein_coding
ENSG00000069482.7	11.0734	0.141151	0.349272	0.40413	0.686117	0.769968	GAL	protein_coding
ENSG00000069493.15	157.177	0.258807	0.119385	2.16784	0.0301708	0.0650667	CLEC2D	protein_coding
ENSG00000069509.6	364.464	0.203902	0.0601034	3.39252	0.000692534	0.00261878	FUNDC1	protein_coding
ENSG00000069535.14	10790.6	-0.550589	0.0907731	-6.06556	1.31498e-09	2.12116e-08	MAOB	protein_coding
ENSG00000069667.16	1460.45	-0.359611	0.112132	-3.20702	0.00134116	0.00464065	RORA	protein_coding
ENSG00000069696.7	42.2594	-0.350087	0.136117	-2.57197	0.0101123	0.0260451	DRD4	protein_coding
ENSG00000069702.11	1100.1	-0.513641	0.124328	-4.13134	3.6065e-05	0.000196025	TGFBR3	protein_coding
ENSG00000069764.10	2.69111	0.336445	0.191638	1.75562	0.0791527	0.143852	PLA2G10	protein_coding
ENSG00000069812.11	35.0075	-0.275089	0.216086	-1.27305	0.203	0.305029	HES2	protein_coding
ENSG00000069849.11	1433.32	0.336176	0.105908	3.17423	0.00150236	0.00511943	ATP1B3	protein_coding
ENSG00000069869.16	1989.28	-0.175704	0.107372	-1.6364	0.101756	0.175782	NEDD4	protein_coding
ENSG00000069943.10	242.748	0.0902822	0.0664128	1.35941	0.174017	0.270069	PIGB	protein_coding
ENSG00000069956.12	2682	0.24695	0.0653952	3.77627	0.000159193	0.000718961	MAPK6	protein_coding
ENSG00000069966.19	1548.62	0.0244551	0.09937	0.246101	0.805604	0.863243	GNB5	protein_coding
ENSG00000069974.16	1258.18	0.0362634	0.0889831	0.407532	0.683617	0.767986	RAB27A	protein_coding
ENSG00000069998.12	1966.43	-0.18695	0.0577214	-3.23882	0.00120023	0.00422498	HDHD5	protein_coding
ENSG00000070010.19	1963.41	-0.085648	0.0554562	-1.54443	0.122485	0.203754	UFD1	protein_coding
ENSG00000070018.9	2230.34	-0.0897457	0.0823119	-1.09031	0.275576	0.387464	LRP6	protein_coding
ENSG00000070019.5	135.397	0.566814	0.300241	1.88787	0.059044	0.113576	GUCY2C	protein_coding
ENSG00000070031.4	7.19403	-0.493375	0.188042	-2.62376	0.00869658	0.0229324	SCT	protein_coding
ENSG00000070047.13	2184.83	0.131459	0.0466577	2.81751	0.00483973	0.0139742	PHRF1	protein_coding
ENSG00000070061.16	1993.38	0.296327	0.085887	3.4502	0.00056018	0.00217595	ELP1	protein_coding
ENSG00000070081.17	3310.91	0.111264	0.0881941	1.26158	0.207101	0.309884	NUCB2	protein_coding
ENSG00000070087.14	635.033	0.926138	0.170098	5.44473	5.18853e-08	5.77105e-07	PFN2	protein_coding
ENSG00000070159.14	2020.89	-0.14253	0.0745543	-1.91176	0.0559072	0.108747	PTPN3	protein_coding
ENSG00000070182.21	61.3278	0.689067	0.153623	4.48544	7.27631e-06	4.77837e-05	SPTB	protein_coding
ENSG00000070190.13	58.2906	0.264013	0.143418	1.84086	0.0656415	0.123704	DAPP1	protein_coding
ENSG00000070193.5	4.05298	-0.0842603	0.271094	-0.310816	0.75594	0.82521	FGF10	protein_coding
ENSG00000070214.16	3475.19	0.142189	0.0665823	2.13554	0.0327169	0.0695801	SLC44A1	protein_coding
ENSG00000070269.14	480.906	0.115239	0.0679206	1.69667	0.089759	0.159003	TMEM260	protein_coding
ENSG00000070366.14	340.276	0.181	0.09836	1.84018	0.0657415	0.123832	SMG6	protein_coding
ENSG00000070367.16	1320.62	0.0803545	0.0534517	1.50331	0.132759	0.217441	EXOC5	protein_coding
ENSG00000070371.16	612.6	-0.418209	0.115545	-3.61946	0.000295222	0.00123991	CLTCL1	protein_coding
ENSG00000070388.11	11.8953	0.156573	0.194295	0.805851	0.420329	0.535486	FGF22	protein_coding
ENSG00000070404.10	1501.79	-0.0455005	0.17243	-0.263878	0.791874	0.852977	FSTL3	protein_coding
ENSG00000070413.20	4633.73	0.0893361	0.0555321	1.60873	0.107676	0.18383	DGCR2	protein_coding
ENSG00000070423.18	1751.34	-0.165261	0.0608039	-2.71793	0.00656923	0.018082	RNF126	protein_coding
ENSG00000070444.15	426.815	0.00679856	0.0542696	0.125274	0.900307	0.933078	MNT	protein_coding
ENSG00000070476.15	1145.97	0.121666	0.0477096	2.55013	0.0107682	0.027454	ZXDC	protein_coding
ENSG00000070495.15	1111.31	0.0852503	0.0709435	1.20166	0.229494	0.335824	JMJD6	protein_coding
ENSG00000070501.12	915.238	-0.26661	0.095867	-2.78104	0.0054185	0.0153678	POLB	protein_coding
ENSG00000070526.15	9.34577	-0.238562	0.175832	-1.35676	0.174858	0.271106	ST6GALNAC1	protein_coding
ENSG00000070540.13	581.559	0.0625112	0.0957329	0.652975	0.513772	0.622671	WIPI1	protein_coding
ENSG00000070601.10	152.819	0.566102	0.210263	2.69235	0.00709511	0.0193064	FRMPD1	protein_coding
ENSG00000070610.14	2166.91	0.142054	0.0530888	2.67578	0.00745554	0.0201364	GBA2	protein_coding
ENSG00000070614.15	5968.82	-0.0698489	0.0740563	-0.943187	0.345585	0.461342	NDST1	protein_coding
ENSG00000070669.17	7.60783	0.633949	0.174259	3.63798	0.000274785	0.00116513	ASNS	protein_coding
ENSG00000070718.12	364.664	0.340776	0.075129	4.53588	5.73636e-06	3.86784e-05	AP3M2	protein_coding
ENSG00000070729.14	6.62331	0.735639	0.236963	3.10444	0.00190637	0.00627031	CNGB1	protein_coding
ENSG00000070731.11	35.3657	0.873355	0.187942	4.64694	3.36891e-06	2.39944e-05	ST6GALNAC2	protein_coding
ENSG00000070748.19	0.255533	0.0200027	0.640844	0.031213	0.9751		CHAT	protein_coding
ENSG00000070756.17	41770.6	0.0241277	0.0947279	0.254706	0.79895	0.858111	PABPC1	protein_coding
ENSG00000070759.17	189.307	0.111739	0.0845063	1.32226	0.186083	0.285093	TESK2	protein_coding
ENSG00000070761.8	933.862	-0.340685	0.0541678	-6.28943	3.18627e-10	5.82536e-09	CFAP20	protein_coding
ENSG00000070770.10	820.019	-0.116931	0.0556518	-2.10111	0.0356311	0.0747285	CSNK2A2	protein_coding
ENSG00000070778.13	519.075	-0.120093	0.0813723	-1.47585	0.139984	0.22726	PTPN21	protein_coding
ENSG00000070785.17	1077.39	-0.254692	0.0639062	-3.98541	6.73638e-05	0.000339483	EIF2B3	protein_coding
ENSG00000070808.16	28.4085	-0.800928	0.250901	-3.19221	0.00141189	0.00485766	CAMK2A	protein_coding
ENSG00000070814.22	1653.41	0.275447	0.0633114	4.35067	1.35725e-05	8.28306e-05	TCOF1	protein_coding
ENSG00000070831.17	6165.2	-0.00996151	0.0431674	-0.230765	0.817498	0.872334	CDC42	protein_coding
ENSG00000070882.13	417.89	0.562457	0.101771	5.52671	3.26289e-08	3.80443e-07	OSBPL3	protein_coding
ENSG00000070886.12	1.09524	0.186523	0.285499	0.653323	0.513548	0.622596	EPHA8	protein_coding
ENSG00000070915.10	3.86857	0.0895582	0.190919	0.469089	0.639006	0.731527	SLC12A3	protein_coding
ENSG00000070950.10	484.796	0.402767	0.053511	7.5268	5.19991e-14	1.95839e-12	RAD18	protein_coding
ENSG00000070961.16	1489.95	0.441202	0.0766668	5.75479	8.67487e-09	1.15185e-07	ATP2B1	protein_coding
ENSG00000070985.13	3.45849	1.06774	0.254282	4.19903	2.68057e-05	0.000150375	TRPM5	protein_coding
ENSG00000071051.14	870.308	0.745939	0.1249	5.97231	2.3392e-09	3.55106e-08	NCK2	protein_coding
ENSG00000071054.16	5148.33	0.367873	0.0640779	5.74103	9.41007e-09	1.23757e-07	MAP4K4	protein_coding
ENSG00000071073.13	1164.75	0.259208	0.0733195	3.53532	0.000407281	0.00164899	MGAT4A	protein_coding
ENSG00000071082.11	24287.7	-0.281869	0.0823221	-3.42398	0.000617118	0.00236565	RPL31	protein_coding
ENSG00000071127.17	7942.53	-0.0527137	0.0500407	-1.05342	0.29215	0.405698	WDR1	protein_coding
ENSG00000071189.21	954.834	0.0752681	0.0570642	1.31901	0.187166	0.286257	SNX13	protein_coding
ENSG00000071203.9	0.0983546	-0.560485	1.25028	-0.448286	0.653947		MS4A12	protein_coding
ENSG00000071205.12	275.36	-0.304681	0.125187	-2.43382	0.0149405	0.0361562	ARHGAP10	protein_coding
ENSG00000071242.12	764.05	-0.482649	0.116671	-4.13682	3.52148e-05	0.000191917	RPS6KA2	protein_coding
ENSG00000071243.16	265.815	0.176895	0.0519037	3.40814	0.000654071	0.00248997	ING3	protein_coding
ENSG00000071246.11	280.433	0.126073	0.0992009	1.27088	0.203771	0.305948	VASH1	protein_coding
ENSG00000071282.12	751.26	-0.0541396	0.0946052	-0.572269	0.56714	0.669872	LMCD1	protein_coding
ENSG00000071462.12	3209.26	-0.177408	0.0575638	-3.08195	0.00205652	0.00668901	BUD23	protein_coding
ENSG00000071537.14	6812.72	-0.267547	0.0720509	-3.71331	0.000204565	0.000896795	SEL1L	protein_coding
ENSG00000071539.14	268.802	1.59077	0.116432	13.6627	1.69613e-42	7.47485e-40	TRIP13	protein_coding
ENSG00000071553.18	6843.44	-0.124448	0.058459	-2.12882	0.0332695	0.0705554	ATP6AP1	protein_coding
ENSG00000071564.17	1637.7	0.388801	0.0661428	5.87821	4.14729e-09	5.9113e-08	TCF3	protein_coding
ENSG00000071575.11	1316.39	-0.252838	0.126105	-2.00498	0.0449655	0.0908093	TRIB2	protein_coding
ENSG00000071626.17	3770.38	0.104633	0.0423324	2.47169	0.0134474	0.0331279	DAZAP1	protein_coding
ENSG00000071655.18	2262.41	-0.158081	0.0712732	-2.21796	0.0265574	0.0584903	MBD3	protein_coding
ENSG00000071677.1	0.155714	-0.264558	0.585278	-0.452021	0.651254		PRLH	protein_coding
ENSG00000071794.16	563.307	0.704464	0.135904	5.18353	2.1773e-07	2.08934e-06	HLTF	protein_coding
ENSG00000071859.15	4288.92	-0.199979	0.0892156	-2.24153	0.0249921	0.0556497	FAM50A	protein_coding
ENSG00000071889.17	3182.46	-0.43839	0.0685794	-6.39244	1.63257e-10	3.17827e-09	FAM3A	protein_coding
ENSG00000071894.17	4038.65	-0.0572551	0.0703902	-0.813396	0.415991	0.531154	CPSF1	protein_coding
ENSG00000071909.19	21.5084	0.0697203	0.223334	0.312179	0.754904	0.824235	MYO3B	protein_coding
ENSG00000071967.12	1072.18	-0.171795	0.136656	-1.25713	0.208706	0.311839	CYBRD1	protein_coding
ENSG00000071991.9	56.5811	0.0932697	0.26032	0.358288	0.720128	0.796955	CDH19	protein_coding
ENSG00000071994.11	1346.23	-0.0160307	0.0580132	-0.276328	0.782296	0.845773	PDCD2	protein_coding
ENSG00000072041.17	8.54262	3.57033	0.527219	6.772	1.27014e-11	3.08477e-10	SLC6A15	protein_coding
ENSG00000072042.13	4894.1	-0.447174	0.0771361	-5.79721	6.74259e-09	9.19676e-08	RDH11	protein_coding
ENSG00000072062.15	5443.81	-0.291653	0.0740792	-3.93705	8.24901e-05	0.000405477	PRKACA	protein_coding
ENSG00000072071.16	528.678	-0.16779	0.171918	-0.975987	0.329071	0.44458	ADGRL1	protein_coding
ENSG00000072080.11	4341.95	-0.631045	0.220098	-2.8671	0.00414246	0.0122266	SPP2	protein_coding
ENSG00000072110.15	6266.22	-0.0340005	0.0736583	-0.461598	0.64437	0.735936	ACTN1	protein_coding
ENSG00000072121.17	948.472	0.13842	0.0496659	2.78703	0.00531928	0.0151336	ZFYVE26	protein_coding
ENSG00000072133.11	26.2647	0.950877	0.319238	2.97858	0.00289585	0.00897605	RPS6KA6	protein_coding
ENSG00000072134.15	214.555	0.448692	0.106615	4.20852	2.57046e-05	0.00014522	EPN2	protein_coding
ENSG00000072135.13	2181.29	-0.127026	0.0443749	-2.86256	0.00420228	0.0123747	PTPN18	protein_coding
ENSG00000072163.20	1706.95	-0.486637	0.101701	-4.78499	1.70998e-06	1.31762e-05	LIMS2	protein_coding
ENSG00000072182.13	2.39643	0.863491	0.223967	3.85545	0.000115519	0.000544724	ASIC4	protein_coding
ENSG00000072195.15	54.698	1.13243	0.211426	5.35614	8.50177e-08	8.95447e-07	SPEG	protein_coding
ENSG00000072201.14	263.395	0.269448	0.106732	2.52453	0.0115853	0.0292179	LNX1	protein_coding
ENSG00000072210.19	15071.2	-0.435187	0.0954079	-4.56133	5.08312e-06	3.46049e-05	ALDH3A2	protein_coding
ENSG00000072274.13	3953.29	0.493242	0.0858223	5.74724	9.07108e-09	1.19801e-07	TFRC	protein_coding
ENSG00000072310.17	8880.56	-0.0217512	0.112069	-0.194087	0.846108	0.893614	SREBF1	protein_coding
ENSG00000072315.3	22.6142	0.138263	0.264253	0.523221	0.600821	0.69912	TRPC5	protein_coding
ENSG00000072364.13	3907.18	-0.302332	0.0655209	-4.61428	3.9446e-06	2.76611e-05	AFF4	protein_coding
ENSG00000072401.15	540.614	0.146186	0.058926	2.48085	0.0131071	0.0324074	UBE2D1	protein_coding
ENSG00000072415.10	1050.11	-0.111865	0.0585786	-1.90966	0.0561766	0.109166	MPP5	protein_coding
ENSG00000072422.17	1259.45	-0.124402	0.193848	-0.641753	0.521033	0.628889	RHOBTB1	protein_coding
ENSG00000072501.19	3220.88	0.458042	0.0655508	6.98758	2.79664e-12	7.68375e-11	SMC1A	protein_coding
ENSG00000072506.13	6198.66	-0.410813	0.0841193	-4.8837	1.04115e-06	8.46449e-06	HSD17B10	protein_coding
ENSG00000072518.21	1291.64	0.364794	0.0507848	7.18313	6.81357e-13	2.13727e-11	MARK2	protein_coding
ENSG00000072571.20	387.601	1.26267	0.108019	11.6894	1.44364e-31	3.32383e-29	HMMR	protein_coding
ENSG00000072609.18	763.648	0.189256	0.0707551	2.67481	0.00747726	0.0201787	CHFR	protein_coding
ENSG00000072657.9	110.162	1.22817	0.301013	4.08012	4.50132e-05	0.000237848	TRHDE	protein_coding
ENSG00000072682.19	1541.96	-0.0124271	0.0990579	-0.125453	0.900165	0.932988	P4HA2	protein_coding
ENSG00000072694.21	187.458	0.458419	0.187055	2.45072	0.0142569	0.0347503	FCGR2B	protein_coding
ENSG00000072736.19	493.294	0.095959	0.0911439	1.05283	0.292419	0.406021	NFATC3	protein_coding
ENSG00000072756.17	458.839	0.0568591	0.0480831	1.18252	0.237	0.344343	TRNT1	protein_coding
ENSG00000072778.20	22633.8	-0.624776	0.0782262	-7.98678	1.38505e-15	7.0656e-14	ACADVL	protein_coding
ENSG00000072786.13	979.072	-0.0754415	0.0701236	-1.07584	0.282	0.394506	STK10	protein_coding
ENSG00000072803.17	1867.92	0.0849914	0.0544924	1.55969	0.118833	0.198885	FBXW11	protein_coding
ENSG00000072818.12	310.563	-0.176187	0.11835	-1.4887	0.136567	0.222591	ACAP1	protein_coding
ENSG00000072832.15	267.818	0.539038	0.156831	3.43706	0.00058807	0.00226897	CRMP1	protein_coding
ENSG00000072840.13	429.148	0.648313	0.199439	3.25069	0.00115124	0.00407371	EVC	protein_coding
ENSG00000072849.11	1803.03	-0.350491	0.0622477	-5.63058	1.79606e-08	2.22246e-07	DERL2	protein_coding
ENSG00000072858.11	61.1215	0.238122	0.136562	1.74369	0.0812134	0.146794	SIDT1	protein_coding
ENSG00000072864.16	332.806	0.728109	0.0672851	10.8213	2.73027e-27	4.62219e-25	NDE1	protein_coding
ENSG00000072952.19	268.065	-0.706843	0.134398	-5.25932	1.44585e-07	1.43985e-06	IRAG1	protein_coding
ENSG00000072954.7	605.271	-0.297811	0.0966084	-3.08266	0.00205161	0.00667681	TMEM38A	protein_coding
ENSG00000072958.9	4463.41	-0.195162	0.0551374	-3.53956	0.00040079	0.00162538	AP1M1	protein_coding
ENSG00000073008.15	2970.13	-0.228294	0.0707274	-3.2278	0.00124746	0.00435967	PVR	protein_coding
ENSG00000073050.12	982.604	0.232127	0.0590122	3.93355	8.37014e-05	0.000410787	XRCC1	protein_coding
ENSG00000073060.16	15786	-0.0759368	0.0878025	-0.86486	0.387116	0.502856	SCARB1	protein_coding
ENSG00000073067.14	19.9825	1.15653	0.20179	5.73134	9.96412e-09	1.30398e-07	CYP2W1	protein_coding
ENSG00000073111.14	644.844	1.73661	0.122624	14.1621	1.5712e-45	9.19711e-43	MCM2	protein_coding
ENSG00000073146.16	52.865	-0.40444	0.160577	-2.51866	0.0117802	0.0296165	MOV10L1	protein_coding
ENSG00000073150.14	1099.06	-0.334789	0.172991	-1.9353	0.0529533	0.103968	PANX2	protein_coding
ENSG00000073169.14	2784.45	-0.625446	0.0803841	-7.78072	7.21137e-15	3.19297e-13	SELENOO	protein_coding
ENSG00000073282.14	34.8784	-0.129733	0.184617	-0.702712	0.482235	0.593827	TP63	protein_coding
ENSG00000073331.18	380.914	-0.138056	0.0925515	-1.49166	0.135788	0.221551	ALPK1	protein_coding
ENSG00000073350.14	3869.53	0.238922	0.0737953	3.23762	0.0012053	0.00423805	LLGL2	protein_coding
ENSG00000073417.15	1461.51	-0.00679984	0.0599926	-0.113345	0.909757	0.939659	PDE8A	protein_coding
ENSG00000073464.13	513.041	0.0852664	0.0718482	1.18676	0.235323	0.34231	CLCN4	protein_coding
ENSG00000073536.18	724.585	-0.000259422	0.0823828	-0.00314898	0.997487	0.998352	NLE1	protein_coding
ENSG00000073578.17	703.91	-0.833915	0.0951993	-8.75968	1.95811e-18	1.51967e-16	SDHA	protein_coding
ENSG00000073584.20	237.363	0.0593147	0.0696373	0.851767	0.394344	0.509867	SMARCE1	protein_coding
ENSG00000073598.6	0.863562	0.235656	0.228863	1.02968	0.30316	0.417778	FNDC8	protein_coding
ENSG00000073605.18	1020.85	-0.0567247	0.1111	-0.510575	0.609649	0.706775	GSDMB	protein_coding
ENSG00000073614.13	1395.27	0.0983144	0.0490412	2.00473	0.0449917	0.0908355	KDM5A	protein_coding
ENSG00000073670.14	42.1028	0.620905	0.1752	3.54398	0.000394133	0.00160176	ADAM11	protein_coding
ENSG00000073711.11	151.448	0.355394	0.128512	2.76545	0.00568445	0.0160025	PPP2R3A	protein_coding
ENSG00000073712.15	2448.05	-0.159128	0.0715719	-2.22333	0.0261936	0.0578589	FERMT2	protein_coding
ENSG00000073734.10	3878.36	-0.646287	0.197673	-3.26948	0.00107744	0.00384048	ABCB11	protein_coding
ENSG00000073737.17	71.923	0.0651123	0.13923	0.46766	0.640028	0.732324	DHRS9	protein_coding
ENSG00000073754.6	592.757	-0.637734	0.249883	-2.55213	0.0107067	0.0273213	CD5L	protein_coding
ENSG00000073756.12	43.8759	-0.167557	0.179036	-0.935884	0.349333	0.465069	PTGS2	protein_coding
ENSG00000073792.16	861.089	0.59451	0.195549	3.04021	0.00236413	0.00753416	IGF2BP2	protein_coding
ENSG00000073803.14	1819.54	0.152027	0.0751434	2.02316	0.043057	0.0875694	MAP3K13	protein_coding
ENSG00000073849.16	31061.3	-0.2155	0.0946116	-2.27773	0.0227426	0.0514267	ST6GAL1	protein_coding
ENSG00000073861.3	44.9579	-0.128945	0.132668	-0.971939	0.331081	0.446602	TBX21	protein_coding
ENSG00000073905.8	5.69755	0.153169	0.113186	1.35324	0.175978	0.272489	VDAC1P1	processed_pseudogene
ENSG00000073910.22	1214.37	-0.111367	0.0889026	-1.25268	0.210322	0.313671	FRY	protein_coding
ENSG00000073921.18	5231.73	0.110777	0.043827	2.52759	0.0114849	0.0290091	PICALM	protein_coding
ENSG00000073969.18	1470.36	0.0448712	0.046598	0.962943	0.335576	0.451074	NSF	protein_coding
ENSG00000074047.22	32.9997	0.0618364	0.192644	0.320988	0.748219	0.819241	GLI2	protein_coding
ENSG00000074054.20	1516.63	0.0282044	0.049615	0.568464	0.56972	0.672104	CLASP1	protein_coding
ENSG00000074071.15	2803.96	-0.469715	0.0796455	-5.89757	3.68886e-09	5.32157e-08	MRPS34	protein_coding
ENSG00000074181.9	2238.4	-0.0166273	0.121875	-0.136429	0.891482	0.926603	NOTCH3	protein_coding
ENSG00000074201.9	3230.3	-0.302165	0.0570991	-5.29194	1.21024e-07	1.22715e-06	CLNS1A	protein_coding
ENSG00000074211.14	189.162	0.101921	0.329821	0.309018	0.757308	0.826389	PPP2R2C	protein_coding
ENSG00000074219.14	698.904	0.46086	0.120677	3.81897	0.000134011	0.000619653	TEAD2	protein_coding
ENSG00000074266.22	532.005	0.296347	0.0462851	6.40265	1.52705e-10	2.98968e-09	EED	protein_coding
ENSG00000074276.10	1515.1	-0.467947	0.252042	-1.85662	0.0633651	0.120358	CDHR2	protein_coding
ENSG00000074317.11	1.47815	0.267927	0.286421	0.93543	0.349567	0.465199	SNCB	protein_coding
ENSG00000074319.13	2605.41	-0.0259684	0.038159	-0.680531	0.496168	0.607066	TSG101	protein_coding
ENSG00000074356.17	938.585	0.0209775	0.0540129	0.38838	0.697735	0.779333	NCBP3	protein_coding
ENSG00000074370.18	587.258	-0.0852535	0.132055	-0.645589	0.518546	0.626785	ATP2A3	protein_coding
ENSG00000074410.14	1252.14	0.0572122	0.249526	0.229284	0.818648	0.873077	CA12	protein_coding
ENSG00000074416.14	5956.28	0.0556337	0.114602	0.48545	0.627357	0.721564	MGLL	protein_coding
ENSG00000074527.13	646.226	-0.208775	0.120147	-1.73767	0.0822692	0.148337	NTN4	protein_coding
ENSG00000074582.15	1086.37	-0.2875	0.0561442	-5.12074	3.04337e-07	2.82088e-06	BCS1L	protein_coding
ENSG00000074590.13	780.911	0.473979	0.0784335	6.04307	1.51206e-09	2.40759e-08	NUAK1	protein_coding
ENSG00000074603.19	837.063	0.243531	0.0499272	4.87772	1.07319e-06	8.69426e-06	DPP8	protein_coding
ENSG00000074621.14	266.531	0.163169	0.0875824	1.86304	0.0624571	0.118982	SLC24A1	protein_coding
ENSG00000074657.14	489.624	0.617813	0.108794	5.67873	1.357e-08	1.73126e-07	ZNF532	protein_coding
ENSG00000074660.16	424.31	-0.304723	0.0686921	-4.43608	9.16139e-06	5.85813e-05	SCARF1	protein_coding
ENSG00000074695.6	8014.06	0.000148392	0.0702803	0.00211143	0.998315	0.998952	LMAN1	protein_coding
ENSG00000074696.13	7689.93	-0.171091	0.0682831	-2.50562	0.0122237	0.0305514	HACD3	protein_coding
ENSG00000074706.13	51.7861	0.177536	0.133175	1.3331	0.1825	0.280836	IPCEF1	protein_coding
ENSG00000074755.15	1181.59	-0.0207336	0.0624778	-0.331855	0.739999	0.812491	ZZEF1	protein_coding
ENSG00000074771.4	0.298576	0.819018	0.638917	1.28189	0.199883		NOX3	protein_coding
ENSG00000074800.16	42684.1	0.306301	0.0921638	3.32345	0.000889123	0.00325077	ENO1	protein_coding
ENSG00000074803.20	118.865	-1.37956	0.340089	-4.05645	4.98241e-05	0.000260361	SLC12A1	protein_coding
ENSG00000074842.8	6934.03	-0.281527	0.0719919	-3.91053	9.20928e-05	0.000446827	MYDGF	protein_coding
ENSG00000074855.11	443.496	0.374563	0.0927046	4.0404	5.33611e-05	0.000276294	ANO8	protein_coding
ENSG00000074935.14	473.934	-0.468078	0.0950262	-4.92578	8.4024e-07	6.98064e-06	TUBE1	protein_coding
ENSG00000074964.17	4782.25	-0.0404412	0.0746102	-0.542032	0.587796	0.688233	ARHGEF10L	protein_coding
ENSG00000074966.11	23.9517	-0.34796	0.115881	-3.00274	0.00267559	0.00838743	TXK	protein_coding
ENSG00000075035.10	3.95957	-0.572869	0.187399	-3.05696	0.00223596	0.00719475	WSCD2	protein_coding
ENSG00000075043.19	2.4879	0.265744	0.288688	0.920522	0.3573	0.473058	KCNQ2	protein_coding
ENSG00000075073.15	18.5519	0.492363	0.177776	2.76956	0.00561313	0.0158275	TACR2	protein_coding
ENSG00000075089.9	719.924	0.142655	0.0508596	2.80489	0.0050334	0.0144416	ACTR6	protein_coding
ENSG00000075131.10	179.187	0.535404	0.0643455	8.32077	8.73944e-17	5.44811e-15	TIPIN	protein_coding
ENSG00000075142.14	1126.19	0.0464404	0.0998297	0.465196	0.641791	0.733839	SRI	protein_coding
ENSG00000075151.21	2038.32	0.0810378	0.063064	1.28501	0.198789	0.3001	EIF4G3	protein_coding
ENSG00000075188.9	399.681	0.438212	0.0547449	8.00463	1.19831e-15	6.23266e-14	NUP37	protein_coding
ENSG00000075213.11	62.1734	1.20585	0.200364	6.01833	1.76231e-09	2.75773e-08	SEMA3A	protein_coding
ENSG00000075218.19	251.38	1.81942	0.113726	15.9983	1.31384e-57	2.52081e-54	GTSE1	protein_coding
ENSG00000075223.14	113.333	0.963875	0.219391	4.39341	1.11586e-05	6.9537e-05	SEMA3C	protein_coding
ENSG00000075234.17	7952.52	-0.704338	0.084122	-8.37281	5.6258e-17	3.57813e-15	TTC38	protein_coding
ENSG00000075239.14	9970.88	-0.747319	0.0914375	-8.173	3.00817e-16	1.72299e-14	ACAT1	protein_coding
ENSG00000075240.17	3190.45	-0.624347	0.131523	-4.74704	2.06413e-06	1.55682e-05	GRAMD4	protein_coding
ENSG00000075275.18	711.142	0.150284	0.136776	1.09876	0.271872	0.38338	CELSR1	protein_coding
ENSG00000075290.8	3.14242	-0.1975	0.25526	-0.773721	0.439096	0.553493	WNT8B	protein_coding
ENSG00000075292.19	3048.75	0.0355407	0.0355977	0.998401	0.318085	0.433691	ZNF638	protein_coding
ENSG00000075303.13	526.967	0.250162	0.0601088	4.16183	3.15707e-05	0.00017384	SLC25A40	protein_coding
ENSG00000075336.12	780.393	0.0780553	0.0494645	1.57801	0.114564	0.193115	TIMM21	protein_coding
ENSG00000075340.23	24.2056	0.207479	0.166415	1.24676	0.212485	0.316233	ADD2	protein_coding
ENSG00000075388.4	2.02808	1.58973	0.598374	2.65675	0.00788972	0.0211098	FGF4	protein_coding
ENSG00000075391.17	727.726	0.254492	0.0923851	2.75468	0.00587487	0.0164647	RASAL2	protein_coding
ENSG00000075399.14	717.467	-0.397674	0.0723989	-5.49282	3.95564e-08	4.51461e-07	VPS9D1	protein_coding
ENSG00000075407.18	555.76	0.373671	0.0598988	6.23838	4.42139e-10	7.87099e-09	ZNF37A	protein_coding
ENSG00000075413.19	1619.56	0.0917391	0.0419533	2.1867	0.0287647	0.062487	MARK3	protein_coding
ENSG00000075415.13	17797.7	-0.173359	0.0533725	-3.24809	0.00116184	0.00410574	SLC25A3	protein_coding
ENSG00000075420.13	3604.52	0.370639	0.0723954	5.11965	3.06101e-07	2.83418e-06	FNDC3B	protein_coding
ENSG00000075426.12	2274.91	-0.016945	0.0964895	-0.175615	0.860597	0.904243	FOSL2	protein_coding
ENSG00000075429.9	1.37736	0.261642	0.300334	0.871171	0.383661	0.499307	CACNG5	protein_coding
ENSG00000075461.6	156.659	0.732693	0.304229	2.40836	0.0160243	0.0383569	CACNG4	protein_coding
ENSG00000075539.15	868.907	0.113173	0.0585531	1.93283	0.0532567	0.10448	FRYL	protein_coding
ENSG00000075568.17	2144.31	0.206373	0.04933	4.18351	2.87038e-05	0.000159812	TMEM131	protein_coding
ENSG00000075618.18	1638.87	0.538099	0.120629	4.46079	8.16597e-06	5.28424e-05	FSCN1	protein_coding
ENSG00000075624.17	126046	-0.074385	0.0561017	-1.3259	0.184874	0.28378	ACTB	protein_coding
ENSG00000075643.6	1649.87	-0.349983	0.0896493	-3.90391	9.46505e-05	0.000457689	MOCOS	protein_coding
ENSG00000075651.16	1340.34	0.327995	0.111691	2.93664	0.00331789	0.0100975	PLD1	protein_coding
ENSG00000075673.12	3.75475	2.00596	0.468877	4.27823	1.88388e-05	0.000110706	ATP12A	protein_coding
ENSG00000075702.18	336.745	1.22107	0.108813	11.2217	3.19183e-29	6.19287e-27	WDR62	protein_coding
ENSG00000075711.21	1752.91	0.151427	0.0516114	2.93399	0.00334635	0.0101717	DLG1	protein_coding
ENSG00000075785.14	8913.08	0.020211	0.03554	0.568682	0.569572	0.671999	RAB7A	protein_coding
ENSG00000075790.12	22.5571	-0.164787	0.0802455	-2.05354	0.0400206	0.082364	BCAP29	protein_coding
ENSG00000075826.17	208.272	-0.479421	0.100797	-4.75631	1.97166e-06	1.4936e-05	SEC31B	protein_coding
ENSG00000075856.12	1310.69	0.283561	0.0344586	8.22904	1.88726e-16	1.11226e-14	SART3	protein_coding
ENSG00000075884.14	229.301	-0.247863	0.115704	-2.14221	0.0321765	0.0686689	ARHGAP15	protein_coding
ENSG00000075886.11	20.4212	0.42854	0.196719	2.17844	0.0293733	0.0635851	TUBA3D	protein_coding
ENSG00000075891.22	9.86308	-0.764972	0.340245	-2.2483	0.0245571	0.0548544	PAX2	protein_coding
ENSG00000075914.13	873.336	-0.169409	0.0601378	-2.81701	0.00484736	0.0139903	EXOSC7	protein_coding
ENSG00000075945.13	1277.87	-0.116512	0.0670304	-1.7382	0.0821758	0.148192	KIFAP3	protein_coding
ENSG00000075975.17	954.693	0.230151	0.0479221	4.8026	1.56615e-06	1.21684e-05	MKRN2	protein_coding
ENSG00000076003.5	1490.97	0.970556	0.0804078	12.0704	1.51353e-33	4.01794e-31	MCM6	protein_coding
ENSG00000076043.11	897.853	-0.208933	0.0589782	-3.54255	0.000396283	0.00160918	REXO2	protein_coding
ENSG00000076053.12	610.218	-0.192116	0.0483138	-3.97642	6.99616e-05	0.000350529	RBM7	protein_coding
ENSG00000076067.13	449.293	0.231034	0.092903	2.48683	0.0128887	0.0319727	RBMS2	protein_coding
ENSG00000076108.12	2252.7	0.526894	0.0596613	8.83143	1.03348e-18	8.41799e-17	BAZ2A	protein_coding
ENSG00000076201.15	2341.96	0.233106	0.0465065	5.01233	5.37748e-07	4.68812e-06	PTPN23	protein_coding
ENSG00000076242.16	1169.28	0.122597	0.0417497	2.93648	0.00331957	0.0101017	MLH1	protein_coding
ENSG00000076248.11	1872.37	0.28211	0.0538007	5.24361	1.57461e-07	1.55596e-06	UNG	protein_coding
ENSG00000076258.10	1188.9	-0.802927	0.123913	-6.47977	9.18607e-11	1.88056e-09	FMO4	protein_coding
ENSG00000076321.11	645.366	-0.0402201	0.0760225	-0.529056	0.596767	0.695647	KLHL20	protein_coding
ENSG00000076344.16	17.5842	-0.552255	0.183011	-3.01761	0.00254778	0.00803784	RGS11	protein_coding
ENSG00000076351.13	1065.56	-0.161041	0.0810922	-1.9859	0.0470448	0.0943135	SLC46A1	protein_coding
ENSG00000076356.7	1249.42	-0.0551747	0.0711826	-0.775115	0.438272	0.552697	PLXNA2	protein_coding
ENSG00000076382.17	1179.06	1.0007	0.0972501	10.2899	7.82316e-25	1.14e-22	SPAG5	protein_coding
ENSG00000076513.17	1457.79	0.191546	0.0564697	3.39202	0.000693794	0.00262222	ANKRD13A	protein_coding
ENSG00000076554.15	2350.97	0.072666	0.0905045	0.8029	0.422033	0.537056	TPD52	protein_coding
ENSG00000076555.15	4037.96	-0.0811119	0.110249	-0.735718	0.461902	0.575043	ACACB	protein_coding
ENSG00000076604.15	2036.12	-0.0549534	0.061754	-0.889875	0.373533	0.48911	TRAF4	protein_coding
ENSG00000076641.4	1000.21	0.41321	0.1246	3.3163	0.000912168	0.00332411	PAG1	protein_coding
ENSG00000076650.7	468.208	0.129276	0.0490761	2.63418	0.00843395	0.0223343	GPATCH1	protein_coding
ENSG00000076662.10	19.9689	0.297996	0.145996	2.04113	0.0412384	0.0844526	ICAM3	protein_coding
ENSG00000076685.19	459.125	0.321793	0.107444	2.99499	0.00274457	0.00857487	NT5C2	protein_coding
ENSG00000076706.17	2633.77	0.151188	0.0970723	1.55747	0.119358	0.1996	MCAM	protein_coding
ENSG00000076716.9	391.201	0.300572	0.213426	1.40832	0.159036	0.251809	GPC4	protein_coding
ENSG00000076770.14	7922.05	0.0973084	0.140062	0.694753	0.48721	0.598382	MBNL3	protein_coding
ENSG00000076826.10	2034.07	-0.0620331	0.0834227	-0.7436	0.457119	0.570671	CAMSAP3	protein_coding
ENSG00000076864.19	2485.66	0.3817	0.146798	2.60016	0.00931791	0.0243182	RAP1GAP	protein_coding
ENSG00000076924.12	2664.91	-0.243666	0.058363	-4.17501	2.97975e-05	0.000165209	XAB2	protein_coding
ENSG00000076928.18	2966.72	0.170005	0.0512302	3.31845	0.000905195	0.00330079	ARHGEF1	protein_coding
ENSG00000076944.16	1168.59	-0.0402754	0.0868761	-0.463596	0.642938	0.734901	STXBP2	protein_coding
ENSG00000076984.18	1463.26	-0.189118	0.0462416	-4.08977	4.31792e-05	0.000229704	MAP2K7	protein_coding
ENSG00000077009.13	1.84003	-0.609303	0.320131	-1.90329	0.0570023	0.110454	NMRK2	protein_coding
ENSG00000077044.11	832.703	0.250107	0.0604676	4.13622	3.53081e-05	0.000192365	DGKD	protein_coding
ENSG00000077063.11	124.595	-0.11602	0.237429	-0.48865	0.62509	0.719579	CTTNBP2	protein_coding
ENSG00000077080.10	7.8024	0.387298	0.19236	2.01341	0.044072	0.0892762	ACTL6B	protein_coding
ENSG00000077092.19	129.723	-0.126403	0.126336	-1.00053	0.317056	0.432562	RARB	protein_coding
ENSG00000077097.15	3249.22	0.209866	0.0460756	4.55482	5.24303e-06	3.56023e-05	TOP2B	protein_coding
ENSG00000077147.16	7094.34	-0.0631946	0.0407324	-1.55146	0.120792	0.201463	TM9SF3	protein_coding
ENSG00000077150.20	3133.18	0.00700724	0.0754948	0.0928176	0.926049	0.951251	NFKB2	protein_coding
ENSG00000077152.11	427.688	0.97481	0.0957893	10.1766	2.52191e-24	3.51196e-22	UBE2T	protein_coding
ENSG00000077157.22	935.913	-0.201476	0.0786327	-2.56224	0.0103999	0.0266525	PPP1R12B	protein_coding
ENSG00000077232.18	2258.32	0.288481	0.0643612	4.48223	7.38686e-06	4.83993e-05	DNAJC10	protein_coding
ENSG00000077235.18	2539.88	0.0814233	0.0471213	1.72795	0.0839972	0.150776	GTF3C1	protein_coding
ENSG00000077238.14	2950.35	0.0496839	0.0833792	0.595879	0.551256	0.656389	IL4R	protein_coding
ENSG00000077254.14	1452.83	0.232475	0.051414	4.52163	6.13642e-06	4.10474e-05	USP33	protein_coding
ENSG00000077264.15	46.5702	-0.277526	0.274205	-1.01211	0.311484	0.426508	PAK3	protein_coding
ENSG00000077274.9	111.239	1.84665	0.326047	5.66374	1.48107e-08	1.86884e-07	CAPN6	protein_coding
ENSG00000077279.19	14.6474	-0.100142	0.253105	-0.395656	0.692359	0.775083	DCX	protein_coding
ENSG00000077312.9	1893.74	0.00189391	0.0754069	0.0251159	0.979963	0.986648	SNRPA	protein_coding
ENSG00000077327.16	3.54435	1.07217	0.232975	4.60209	4.18282e-06	2.91422e-05	SPAG6	protein_coding
ENSG00000077348.9	1226.4	-0.281264	0.0808929	-3.47699	0.000507068	0.00199773	EXOSC5	protein_coding
ENSG00000077380.16	1649.91	0.199563	0.0625615	3.18987	0.00142335	0.00488978	DYNC1I2	protein_coding
ENSG00000077420.16	1105.75	0.269249	0.132986	2.02465	0.0429038	0.0873351	APBB1IP	protein_coding
ENSG00000077454.16	247.261	0.224541	0.0872583	2.57329	0.0100737	0.0259709	LRCH4	protein_coding
ENSG00000077458.13	486.569	0.184578	0.0722772	2.55375	0.0106569	0.0272181	FAM76B	protein_coding
ENSG00000077463.15	771.009	-0.080782	0.0700178	-1.15373	0.248609	0.35699	SIRT6	protein_coding
ENSG00000077498.9	1.17795	-0.498577	0.665678	-0.748976	0.453871	0.567685	TYR	protein_coding
ENSG00000077514.9	510.663	0.546018	0.0666785	8.18881	2.63818e-16	1.52362e-14	POLD3	protein_coding
ENSG00000077522.14	387.001	-1.62721	0.264076	-6.16191	7.18729e-10	1.22336e-08	ACTN2	protein_coding
ENSG00000077549.19	6573	-0.0708233	0.0474602	-1.49227	0.135629	0.221344	CAPZB	protein_coding
ENSG00000077585.14	681.771	-0.046557	0.11821	-0.393849	0.693692	0.776173	GPR137B	protein_coding
ENSG00000077616.11	68.7376	0.872407	0.173157	5.03823	4.69854e-07	4.15435e-06	NAALAD2	protein_coding
ENSG00000077684.16	1014.14	-0.0624218	0.0724508	-0.861576	0.388921	0.504575	JADE1	protein_coding
ENSG00000077713.19	828.994	0.0365831	0.0754017	0.485177	0.627551	0.721713	SLC25A43	protein_coding
ENSG00000077721.16	2084.85	-0.0557348	0.0537465	-1.03699	0.299738	0.413955	UBE2A	protein_coding
ENSG00000077782.21	692.135	0.309395	0.15548	1.98993	0.0465981	0.0935756	FGFR1	protein_coding
ENSG00000077800.13	2.39338	0.167536	0.220085	0.761233	0.446518	0.560698	FKBP6	protein_coding
ENSG00000077935.17	55.0673	1.77578	0.216445	8.20432	2.31908e-16	1.35519e-14	SMC1B	protein_coding
ENSG00000077942.19	2310.39	0.931852	0.177088	5.2621	1.42419e-07	1.42115e-06	FBLN1	protein_coding
ENSG00000077943.8	98.3398	0.0570358	0.130416	0.437339	0.661865	0.750395	ITGA8	protein_coding
ENSG00000077984.6	192.877	-0.182907	0.149398	-1.22429	0.220841	0.325994	CST7	protein_coding
ENSG00000078018.20	1116.58	-0.142695	0.157922	-0.903579	0.366219	0.481818	MAP2	protein_coding
ENSG00000078043.16	690.842	0.113984	0.0473189	2.40884	0.0160034	0.0383227	PIAS2	protein_coding
ENSG00000078053.17	18.0042	0.499933	0.18986	2.63317	0.0084593	0.0223921	AMPH	protein_coding
ENSG00000078061.13	3550.66	-0.256729	0.059837	-4.29047	1.78292e-05	0.000105491	ARAF	protein_coding
ENSG00000078070.13	1710.48	-0.101564	0.0822849	-1.23429	0.217095	0.32155	MCCC1	protein_coding
ENSG00000078081.8	150.754	0.570887	0.155516	3.67093	0.000241669	0.00104004	LAMP3	protein_coding
ENSG00000078098.14	100.158	0.233158	0.194025	1.20169	0.229483	0.335824	FAP	protein_coding
ENSG00000078114.19	337.89	1.08396	0.225361	4.80989	1.51014e-06	1.17824e-05	NEBL	protein_coding
ENSG00000078124.12	546.41	0.0651151	0.0694828	0.937139	0.348687	0.464468	ACER3	protein_coding
ENSG00000078140.14	3513.87	0.0244411	0.048428	0.504689	0.613777	0.710274	UBE2K	protein_coding
ENSG00000078142.13	886.186	0.0692744	0.044445	1.55866	0.119078	0.1992	PIK3C3	protein_coding
ENSG00000078177.14	591.172	0.38173	0.0904624	4.21976	2.44563e-05	0.000139078	N4BP2	protein_coding
ENSG00000078237.7	116.171	-0.228862	0.0887869	-2.57765	0.00994742	0.0256875	TIGAR	protein_coding
ENSG00000078246.17	584.163	0.298033	0.0637718	4.67344	2.96198e-06	2.14365e-05	TULP3	protein_coding
ENSG00000078269.15	1053.34	0.652161	0.088036	7.40789	1.28326e-13	4.53155e-12	SYNJ2	protein_coding
ENSG00000078295.17	2.71073	-0.00383581	0.246865	-0.0155381	0.987603	0.992026	ADCY2	protein_coding
ENSG00000078304.19	3355.74	-0.252644	0.0500373	-5.04911	4.43866e-07	3.95188e-06	PPP2R5C	protein_coding
ENSG00000078319.10	515.49	-0.202283	0.0605246	-3.34216	0.000831301	0.00306991	PMS2P1	transcribed_unprocessed_pseudogene
ENSG00000078328.22	1.77378	1.14079	0.25113	4.54265	5.55522e-06	3.7545e-05	RBFOX1	protein_coding
ENSG00000078369.18	9382.53	0.0636659	0.0463285	1.37423	0.169371	0.264427	GNB1	protein_coding
ENSG00000078399.19	5.07232	0.0598729	0.223561	0.267815	0.788842	0.85058	HOXA9	protein_coding
ENSG00000078401.7	134.382	0.108743	0.143531	0.757624	0.448676	0.562818	EDN1	protein_coding
ENSG00000078403.17	991.655	0.273078	0.0647346	4.21842	2.46018e-05	0.000139745	MLLT10	protein_coding
ENSG00000078487.17	240.811	-0.511456	0.0977949	-5.22989	1.6961e-07	1.66128e-06	ZCWPW1	protein_coding
ENSG00000078549.15	23.3872	0.169119	0.201835	0.837908	0.402083	0.517644	ADCYAP1R1	protein_coding
ENSG00000078579.9	1.65043	0.712435	0.322492	2.20916	0.0271636	0.0595618	FGF20	protein_coding
ENSG00000078589.13	64.7627	0.100867	0.170985	0.589916	0.555247	0.659455	P2RY10	protein_coding
ENSG00000078596.11	338.946	0.247438	0.141331	1.75076	0.0799865	0.144993	ITM2A	protein_coding
ENSG00000078618.22	5098.41	-0.0452248	0.0463826	-0.975038	0.329541	0.445076	NRDC	protein_coding
ENSG00000078668.14	3196.4	-0.0441934	0.0744567	-0.593546	0.552816	0.657499	VDAC3	protein_coding
ENSG00000078674.18	3011.34	0.0419321	0.0830294	0.505028	0.613539	0.71007	PCM1	protein_coding
ENSG00000078687.17	593.818	-0.0628493	0.0922533	-0.68127	0.495701	0.606645	TNRC6C	protein_coding
ENSG00000078699.22	879.018	0.4779	0.0602639	7.93012	2.18937e-15	1.08141e-13	CBFA2T2	protein_coding
ENSG00000078725.13	14.5135	-0.751804	0.263693	-2.85105	0.00435747	0.0127696	BRINP1	protein_coding
ENSG00000078747.16	2567.41	0.0368702	0.0609874	0.604554	0.545475	0.650884	ITCH	protein_coding
ENSG00000078795.17	1.95977	-0.062651	0.178139	-0.351697	0.725065	0.800872	PKD2L2	protein_coding
ENSG00000078804.13	3253.69	-0.187927	0.0943744	-1.99129	0.0464489	0.0933294	TP53INP2	protein_coding
ENSG00000078808.19	7531.29	-0.142612	0.0563677	-2.53004	0.011405	0.0288517	SDF4	protein_coding
ENSG00000078814.17	116.551	-0.0139934	0.14488	-0.0965862	0.923055	0.949362	MYH7B	protein_coding
ENSG00000078898.7	349.328	0.358308	0.335198	1.06895	0.285094	0.397915	BPIFB2	protein_coding
ENSG00000078900.15	145.378	1.13579	0.157508	7.21096	5.55585e-13	1.76034e-11	TP73	protein_coding
ENSG00000078902.16	6746.78	-0.310426	0.0558534	-5.55788	2.73069e-08	3.2308e-07	TOLLIP	protein_coding
ENSG00000078967.13	720.759	-0.546746	0.0670654	-8.15243	3.5668e-16	2.01279e-14	UBE2D4	protein_coding
ENSG00000079101.16	5.59969	0.187544	0.205407	0.913037	0.361223	0.476881	CLUL1	protein_coding
ENSG00000079102.16	64.1961	-0.622804	0.131843	-4.72382	2.31455e-06	1.71904e-05	RUNX1T1	protein_coding
ENSG00000079112.10	34.2357	2.50781	0.293868	8.5338	1.41621e-17	9.7625e-16	CDH17	protein_coding
ENSG00000079134.12	695.983	0.303779	0.0550122	5.52203	3.35096e-08	3.89135e-07	THOC1	protein_coding
ENSG00000079150.18	262.217	-0.157139	0.0780383	-2.01361	0.0440508	0.0892542	FKBP7	protein_coding
ENSG00000079156.17	247.94	0.634527	0.12862	4.93336	8.08274e-07	6.73776e-06	OSBPL6	protein_coding
ENSG00000079215.14	370.367	0.0470999	0.141335	0.33325	0.738946	0.811738	SLC1A3	protein_coding
ENSG00000079246.16	9063.41	0.118938	0.0401543	2.96202	0.0030563	0.00940667	XRCC5	protein_coding
ENSG00000079257.8	150.306	-0.0415386	0.13234	-0.313879	0.753613	0.82332	LXN	protein_coding
ENSG00000079263.19	121.03	0.664062	0.154791	4.29007	1.78619e-05	0.000105648	SP140	protein_coding
ENSG00000079277.22	741.28	0.0628072	0.0431291	1.45626	0.145321	0.234156	MKNK1	protein_coding
ENSG00000079308.19	4260.3	0.100696	0.083751	1.20233	0.229236	0.335571	TNS1	protein_coding
ENSG00000079313.15	841.319	0.104844	0.0676386	1.55007	0.121125	0.201862	REXO1	protein_coding
ENSG00000079332.15	4159.1	-0.14743	0.0410803	-3.58882	0.00033218	0.00137688	SAR1A	protein_coding
ENSG00000079335.20	129.051	0.699105	0.0965151	7.24348	4.37312e-13	1.41946e-11	CDC14A	protein_coding
ENSG00000079337.16	273.775	-0.616018	0.0910887	-6.76283	1.35318e-11	3.27264e-10	RAPGEF3	protein_coding
ENSG00000079385.23	3145.29	-0.283921	0.102733	-2.76368	0.00571531	0.0160762	CEACAM1	protein_coding
ENSG00000079387.14	421.381	0.447411	0.0467275	9.5749	1.01959e-21	1.16986e-19	SENP1	protein_coding
ENSG00000079393.20	7.01803	-0.242938	0.277961	-0.873998	0.382119	0.497751	DUSP13	protein_coding
ENSG00000079432.7	2753.71	0.167927	0.0540268	3.10822	0.00188221	0.00619912	CIC	protein_coding
ENSG00000079435.10	98.0707	-0.329278	0.134258	-2.45258	0.0141837	0.0346108	LIPE	protein_coding
ENSG00000079459.13	5289.1	-0.081625	0.091858	-0.8886	0.374218	0.489806	FDFT1	protein_coding
ENSG00000079462.8	684.579	0.500267	0.145923	3.4283	0.000607374	0.00233303	PAFAH1B3	protein_coding
ENSG00000079482.13	88.9619	0.470316	0.124187	3.78717	0.000152372	0.000691865	OPHN1	protein_coding
ENSG00000079557.5	7283.29	-0.92638	0.172331	-5.3756	7.63293e-08	8.13112e-07	AFM	protein_coding
ENSG00000079616.13	999.532	0.4552	0.0714502	6.37088	1.87948e-10	3.61413e-09	KIF22	protein_coding
ENSG00000079689.14	697.837	0.114567	0.229635	0.498908	0.617844	0.713201	SCGN	protein_coding
ENSG00000079691.18	399.419	0.813283	0.12459	6.52766	6.68055e-11	1.40683e-09	CARMIL1	protein_coding
ENSG00000079739.17	7156.98	-0.407303	0.0835533	-4.87476	1.08938e-06	8.80686e-06	PGM1	protein_coding
ENSG00000079785.16	3774.48	0.0172574	0.0418287	0.412573	0.679919	0.764926	DDX1	protein_coding
ENSG00000079805.18	4743.48	0.0910087	0.0513299	1.77302	0.0762261	0.139502	DNM2	protein_coding
ENSG00000079819.19	1325.31	0.623077	0.0888656	7.01146	2.35849e-12	6.57938e-11	EPB41L2	protein_coding
ENSG00000079841.18	1.75279	0.336731	0.247283	1.36172	0.173285	0.269248	RIMS1	protein_coding
ENSG00000079931.15	221.597	-0.0607241	0.205955	-0.294841	0.768115	0.835121	MOXD1	protein_coding
ENSG00000079950.14	1313.52	0.11703	0.062755	1.86487	0.0622	0.118603	STX7	protein_coding
ENSG00000079974.18	299.028	0.0909733	0.055816	1.62988	0.103127	0.17768	RABL2B	protein_coding
ENSG00000079999.14	3798.83	-0.254048	0.0545806	-4.65454	3.24699e-06	2.32266e-05	KEAP1	protein_coding
ENSG00000080007.8	16.4524	0.362156	0.234812	1.54232	0.122995	0.204457	DDX43	protein_coding
ENSG00000080031.10	1838.27	-0.414926	0.150844	-2.7507	0.00594684	0.0166354	PTPRH	protein_coding
ENSG00000080166.16	11.9134	-0.582442	0.22081	-2.63775	0.00834572	0.0221424	DCT	protein_coding
ENSG00000080189.15	2892.62	-0.0697315	0.0493369	-1.41338	0.157545	0.249965	SLC35C2	protein_coding
ENSG00000080200.10	160.875	0.497853	0.160785	3.09638	0.00195897	0.00641827	CRYBG3	protein_coding
ENSG00000080224.17	7.23369	2.95688	0.386523	7.64993	2.01082e-14	8.18502e-13	EPHA6	protein_coding
ENSG00000080293.10	125.687	1.11443	0.211426	5.27101	1.35672e-07	1.3601e-06	SCTR	protein_coding
ENSG00000080298.15	161.4	0.50224	0.0778678	6.44991	1.11917e-10	2.24719e-09	RFX3	protein_coding
ENSG00000080345.18	1307.53	0.441949	0.0536341	8.24009	1.72088e-16	1.03181e-14	RIF1	protein_coding
ENSG00000080371.6	2200.93	-0.0338876	0.0391522	-0.865536	0.386745	0.502469	RAB21	protein_coding
ENSG00000080493.18	1306.75	-0.287188	0.16763	-1.71323	0.0866708	0.154659	SLC4A4	protein_coding
ENSG00000080503.24	2655.83	-0.135114	0.0911191	-1.48282	0.138121	0.224711	SMARCA2	protein_coding
ENSG00000080511.5	7.54937	0.638966	0.349438	1.82855	0.0674664	0.126447	RDH8	protein_coding
ENSG00000080546.13	927.765	-0.28091	0.0798727	-3.51697	0.000436503	0.00174966	SESN1	protein_coding
ENSG00000080561.14	664.63	-0.139738	0.09947	-1.40482	0.160074	0.25314	MID2	protein_coding
ENSG00000080572.13	0.225923	-0.380479	0.43113	-0.882516	0.377498		DNAAF6	protein_coding
ENSG00000080573.7	2829.29	-0.389074	0.152505	-2.55121	0.0107349	0.0273873	COL5A3	protein_coding
ENSG00000080603.17	80.5045	0.192388	0.0718165	2.67889	0.00738668	0.0199754	SRCAP	protein_coding
ENSG00000080608.10	796.663	0.154263	0.0697105	2.2129	0.0269043	0.0590848	PUM3	protein_coding
ENSG00000080618.17	23392	-0.798848	0.117375	-6.80595	1.00383e-11	2.47101e-10	CPB2	protein_coding
ENSG00000080644.16	6.6055	-0.0875654	0.278629	-0.314272	0.753314	0.823045	CHRNA3	protein_coding
ENSG00000080709.16	67.1314	-0.813959	0.216154	-3.76565	0.00016612	0.000746242	KCNN2	protein_coding
ENSG00000080802.19	757.561	-0.0338576	0.0406409	-0.833091	0.404793	0.520165	CNOT4	protein_coding
ENSG00000080815.19	2268.99	-0.0837934	0.044093	-1.90038	0.0573837	0.111019	PSEN1	protein_coding
ENSG00000080819.9	783.521	0.0908855	0.0614009	1.4802	0.13882	0.225614	CPOX	protein_coding
ENSG00000080822.17	1149.75	0.0796843	0.0431612	1.8462	0.0648629	0.122544	CLDND1	protein_coding
ENSG00000080823.23	163.244	0.232761	0.0853776	2.72625	0.00640582	0.0177207	MOK	protein_coding
ENSG00000080824.19	35457.8	0.00750024	0.0650554	0.11529	0.908215	0.938712	HSP90AA1	protein_coding
ENSG00000080839.12	268.623	1.10342	0.0775376	14.2307	5.90655e-46	3.70889e-43	RBL1	protein_coding
ENSG00000080845.18	2121.19	0.0706728	0.0587141	1.20368	0.228715	0.334974	DLGAP4	protein_coding
ENSG00000080854.16	22.3093	0.0987683	0.169799	0.581678	0.560783	0.664444	IGSF9B	protein_coding
ENSG00000080910.13	16764.2	-0.9655	0.150505	-6.41508	1.40745e-10	2.78236e-09	CFHR2	protein_coding
ENSG00000080947.15	50.7323	0.417618	0.0891183	4.68611	2.78443e-06	2.03005e-05	CROCCP3	transcribed_unprocessed_pseudogene
ENSG00000080986.13	378.27	1.33236	0.104474	12.753	3.0001e-37	9.41923e-35	NDC80	protein_coding
ENSG00000081014.11	397.917	0.344382	0.0479656	7.17978	6.98225e-13	2.18423e-11	AP4E1	protein_coding
ENSG00000081019.13	423.254	0.140875	0.0553872	2.54345	0.0109763	0.0279022	RSBN1	protein_coding
ENSG00000081026.19	546.211	0.23031	0.0814064	2.82914	0.00466731	0.013546	MAGI3	protein_coding
ENSG00000081041.9	1738.04	-0.962703	0.161089	-5.97623	2.28365e-09	3.4759e-08	CXCL2	protein_coding
ENSG00000081051.8	20963.8	0.345276	0.328789	1.05015	0.293651	0.407306	AFP	protein_coding
ENSG00000081052.13	195.302	0.214049	0.164927	1.29784	0.194342	0.294778	COL4A4	protein_coding
ENSG00000081059.20	951.04	-0.238704	0.141279	-1.6896	0.0911043	0.160915	TCF7	protein_coding
ENSG00000081087.15	1099.33	0.0143576	0.0782755	0.183424	0.854465	0.899854	OSTM1	protein_coding
ENSG00000081138.14	2.4514	-0.687251	0.359392	-1.91226	0.0558427	0.108665	CDH7	protein_coding
ENSG00000081148.12	10.3471	0.0146144	0.117158	0.124741	0.900729	0.933376	IMPG2	protein_coding
ENSG00000081154.12	2707.35	0.183407	0.0359296	5.10463	3.3145e-07	3.03391e-06	PCNP	protein_coding
ENSG00000081177.18	543.021	0.298562	0.0561747	5.31489	1.06724e-07	1.09861e-06	EXD2	protein_coding
ENSG00000081181.8	138.58	-0.285796	0.173557	-1.6467	0.0996201	0.172892	ARG2	protein_coding
ENSG00000081189.16	560.591	-0.301575	0.083619	-3.60653	0.000310317	0.0012957	MEF2C	protein_coding
ENSG00000081237.20	768.127	0.39512	0.147008	2.68774	0.00719379	0.019541	PTPRC	protein_coding
ENSG00000081248.11	4.95096	0.37052	0.198553	1.8661	0.0620269	0.118338	CACNA1S	protein_coding
ENSG00000081277.13	21.49	-0.601651	0.234341	-2.56742	0.0102458	0.0263241	PKP1	protein_coding
ENSG00000081307.14	1719.7	-0.0255472	0.0428717	-0.5959	0.551242	0.656389	UBA5	protein_coding
ENSG00000081320.11	456.288	0.331983	0.114866	2.89019	0.00385013	0.0114766	STK17B	protein_coding
ENSG00000081377.17	1529.28	-0.660672	0.108293	-6.10079	1.05546e-09	1.73661e-08	CDC14B	protein_coding
ENSG00000081386.12	260.137	0.210575	0.0740818	2.84246	0.00447663	0.0130766	ZNF510	protein_coding
ENSG00000081479.15	118.985	0.353552	0.30323	1.16595	0.243634	0.351663	LRP2	protein_coding
ENSG00000081665.14	298.975	0.521972	0.108167	4.8256	1.39582e-06	1.09759e-05	ZNF506	protein_coding
ENSG00000081692.12	439.92	-0.237216	0.0771611	-3.0743	0.00211	0.00684235	JMJD4	protein_coding
ENSG00000081721.12	491.845	0.264165	0.0558498	4.72992	2.24604e-06	1.67464e-05	DUSP12	protein_coding
ENSG00000081760.17	745.788	0.551834	0.0866979	6.36502	1.95264e-10	3.74231e-09	AACS	protein_coding
ENSG00000081791.9	2838.31	-0.174649	0.0528047	-3.30745	0.000941512	0.00341842	DELE1	protein_coding
ENSG00000081800.9	1.00273	0.702167	0.465451	1.50857	0.131408	0.215688	SLC13A1	protein_coding
ENSG00000081803.16	1025.04	0.326584	0.089091	3.66573	0.00024663	0.00105875	CADPS2	protein_coding
ENSG00000081818.4	39.6976	-0.409295	0.149264	-2.74209	0.00610493	0.0170142	PCDHB4	protein_coding
ENSG00000081842.18	7.26724	0.921573	0.338863	2.7196	0.00653605	0.0180122	PCDHA6	protein_coding
ENSG00000081853.15	125.592	-0.0983525	0.20557	-0.478438	0.632339	0.726012	PCDHGA2	protein_coding
ENSG00000081870.12	967.044	0.045796	0.063654	0.719453	0.471862	0.584209	HSPB11	protein_coding
ENSG00000081913.14	1539.11	-0.253112	0.0824857	-3.06855	0.00215099	0.00696024	PHLPP1	protein_coding
ENSG00000081923.15	1691.22	0.278231	0.0896791	3.10252	0.00191883	0.00630529	ATP8B1	protein_coding
ENSG00000081985.13	64.174	-0.795364	0.16701	-4.76237	1.91336e-06	1.45326e-05	IL12RB2	protein_coding
ENSG00000082014.17	329.272	0.388067	0.149107	2.60261	0.00925172	0.0241647	SMARCD3	protein_coding
ENSG00000082068.9	909.282	-0.173952	0.0490513	-3.54632	0.000390653	0.00158889	WDR70	protein_coding
ENSG00000082074.19	384.258	0.422388	0.137335	3.07561	0.00210072	0.00681674	FYB1	protein_coding
ENSG00000082126.18	1.45932	0.0509063	0.188189	0.270506	0.786771	0.848946	MPP4	protein_coding
ENSG00000082146.13	1971.08	-0.107154	0.0607717	-1.76323	0.0778619	0.142014	STRADB	protein_coding
ENSG00000082153.18	3965.01	-0.0238548	0.0539491	-0.442172	0.658365	0.747563	BZW1	protein_coding
ENSG00000082175.15	36.121	-0.0075585	0.221752	-0.0340854	0.972809	0.982079	PGR	protein_coding
ENSG00000082196.21	625.803	-1.68778	0.206737	-8.16389	3.244e-16	1.84572e-14	C1QTNF3	protein_coding
ENSG00000082212.13	996.389	0.423077	0.0666343	6.34923	2.16389e-10	4.10166e-09	ME2	protein_coding
ENSG00000082213.18	821.188	0.212759	0.0490337	4.33903	1.43111e-05	8.68959e-05	C5orf22	protein_coding
ENSG00000082258.13	1005.66	0.138882	0.0577088	2.40661	0.0161014	0.0385095	CCNT2	protein_coding
ENSG00000082269.17	312.34	0.296545	0.087006	3.40833	0.000653623	0.00248854	FAM135A	protein_coding
ENSG00000082293.13	3.67445	0.426761	0.241508	1.76706	0.0772174	0.141055	COL19A1	protein_coding
ENSG00000082397.17	252.097	-0.0986317	0.13721	-0.718839	0.47224	0.584546	EPB41L3	protein_coding
ENSG00000082438.17	3540.25	-0.465651	0.107535	-4.33024	1.4895e-05	9.00428e-05	COBLL1	protein_coding
ENSG00000082458.12	338.193	0.849918	0.160951	5.2806	1.28762e-07	1.29686e-06	DLG3	protein_coding
ENSG00000082482.14	17.003	1.84516	0.402867	4.58008	4.6479e-06	3.20207e-05	KCNK2	protein_coding
ENSG00000082497.12	33.3549	-0.126497	0.203231	-0.62243	0.533659	0.639946	SERTAD4	protein_coding
ENSG00000082512.15	336.01	0.640962	0.0982656	6.52275	6.90302e-11	1.44838e-09	TRAF5	protein_coding
ENSG00000082515.18	1346.13	-0.272814	0.063724	-4.28119	1.859e-05	0.000109355	MRPL22	protein_coding
ENSG00000082516.9	793.536	0.210571	0.0484693	4.34442	1.39643e-05	8.49369e-05	GEMIN5	protein_coding
ENSG00000082556.14	1.8047	-0.310905	0.432635	-0.718631	0.472368	0.584679	OPRK1	protein_coding
ENSG00000082641.16	12301.3	-0.185388	0.0737688	-2.51309	0.0119678	0.0300138	NFE2L1	protein_coding
ENSG00000082684.16	223.339	0.436899	0.113997	3.83256	0.000126819	0.000590748	SEMA5B	protein_coding
ENSG00000082701.17	1801.54	0.133207	0.0417789	3.18839	0.0014307	0.00490896	GSK3B	protein_coding
ENSG00000082781.12	7453.52	0.084226	0.0686062	1.22767	0.21957	0.324451	ITGB5	protein_coding
ENSG00000082805.20	1218.03	0.148577	0.0609585	2.43734	0.0147957	0.035861	ERC1	protein_coding
ENSG00000082898.18	4005.29	0.269118	0.0392911	6.84935	7.4185e-12	1.86467e-10	XPO1	protein_coding
ENSG00000082929.8	14.1891	-0.0433087	0.29465	-0.146984	0.883145	0.920628	LINC01587	lncRNA
ENSG00000082996.20	1973.89	0.00486998	0.0500171	0.0973664	0.922435	0.949177	RNF13	protein_coding
ENSG00000083067.23	51.6863	-1.32433	0.211573	-6.25945	3.86337e-10	6.95648e-09	TRPM3	protein_coding
ENSG00000083093.10	362.541	0.374719	0.0534189	7.01474	2.30385e-12	6.45826e-11	PALB2	protein_coding
ENSG00000083097.14	323.502	0.229006	0.08878	2.57948	0.0098949	0.0255729	DOP1A	protein_coding
ENSG00000083099.11	1047.89	0.00820979	0.0517465	0.158654	0.873941	0.914287	LYRM2	protein_coding
ENSG00000083123.15	1340.14	-0.34727	0.101148	-3.4333	0.000596279	0.00229501	BCKDHB	protein_coding
ENSG00000083168.11	1010.01	0.285139	0.0730072	3.90563	9.39817e-05	0.000455097	KAT6A	protein_coding
ENSG00000083223.18	1690.41	-0.316309	0.0897434	-3.52459	0.000424134	0.001709	TUT7	protein_coding
ENSG00000083290.20	316.029	-0.0251401	0.134672	-0.186677	0.851914	0.897907	ULK2	protein_coding
ENSG00000083307.12	40.6488	2.13304	0.29066	7.3386	2.15832e-13	7.30066e-12	GRHL2	protein_coding
ENSG00000083312.17	2752.87	0.117617	0.0489243	2.40406	0.0162139	0.038733	TNPO1	protein_coding
ENSG00000083444.17	11570.8	-0.0224314	0.0801704	-0.279797	0.779633	0.843873	PLOD1	protein_coding
ENSG00000083454.22	39.7091	0.258294	0.198905	1.29858	0.194089	0.294485	P2RX5	protein_coding
ENSG00000083457.12	376.69	0.133352	0.105869	1.25959	0.207818	0.310782	ITGAE	protein_coding
ENSG00000083520.15	1158.97	-0.0320148	0.0557496	-0.574261	0.565791	0.668843	DIS3	protein_coding
ENSG00000083535.16	417.485	0.0611579	0.0628051	0.973773	0.330169	0.445611	PIBF1	protein_coding
ENSG00000083544.16	571.952	-0.325495	0.056805	-5.73004	1.00406e-08	1.313e-07	TDRD3	protein_coding
ENSG00000083622.8	0.669797	-0.055856	0.55918	-0.0998893	0.920432	0.947822	AC000061.1	lncRNA
ENSG00000083635.8	258.568	-0.0936255	0.0571255	-1.63895	0.101225	0.175049	NUFIP1	protein_coding
ENSG00000083642.19	882.31	0.107441	0.0559353	1.92081	0.0547554	0.106898	PDS5B	protein_coding
ENSG00000083720.13	251.017	0.258599	0.190894	1.35467	0.175521	0.271988	OXCT1	protein_coding
ENSG00000083750.13	320.156	0.0348445	0.0645198	0.540058	0.589157	0.689312	RRAGB	protein_coding
ENSG00000083782.8	0.594828	1.08167	0.309174	3.49857	0.000467754	0.00186003	EPYC	protein_coding
ENSG00000083799.18	1325.38	-0.116506	0.0585668	-1.98928	0.0466708	0.0936997	CYLD	protein_coding
ENSG00000083807.10	18361.8	-1.30543	0.168747	-7.73601	1.02588e-14	4.40123e-13	SLC27A5	protein_coding
ENSG00000083812.12	272.795	-0.130646	0.0556874	-2.34607	0.0189725	0.0441206	ZNF324	protein_coding
ENSG00000083814.13	153.056	-0.039004	0.112272	-0.347408	0.728285	0.803372	ZNF671	protein_coding
ENSG00000083817.9	129.434	0.0846206	0.0709438	1.19278	0.232954	0.339581	ZNF416	protein_coding
ENSG00000083828.16	170.464	0.268528	0.0653177	4.11111	3.93762e-05	0.000211723	ZNF586	protein_coding
ENSG00000083838.16	139.318	-0.00027906	0.0495363	-0.00563344	0.995505	0.996977	ZNF446	protein_coding
ENSG00000083844.10	631.377	0.156008	0.0664383	2.34816	0.0188665	0.0439272	ZNF264	protein_coding
ENSG00000083845.9	24431	-0.298695	0.0952631	-3.13548	0.00171573	0.00572619	RPS5	protein_coding
ENSG00000083857.14	6109.26	0.0380452	0.118826	0.320177	0.748834	0.819733	FAT1	protein_coding
ENSG00000083896.13	1788.56	0.12236	0.0385019	3.17802	0.00148284	0.00506243	YTHDC1	protein_coding
ENSG00000083937.10	1439.59	0.227407	0.0490005	4.64091	3.46877e-06	2.46396e-05	CHMP2B	protein_coding
ENSG00000084070.12	3770.23	-0.140598	0.0551002	-2.55168	0.0107205	0.0273544	SMAP2	protein_coding
ENSG00000084072.17	1443.5	-0.066576	0.0557871	-1.19339	0.232715	0.339331	PPIE	protein_coding
ENSG00000084073.10	2850.42	-0.0478359	0.0501429	-0.953991	0.340088	0.455809	ZMPSTE24	protein_coding
ENSG00000084090.13	5891.27	-0.0705925	0.0414242	-1.70414	0.0883555	0.157061	STARD7	protein_coding
ENSG00000084092.7	642.968	0.0161338	0.0555086	0.290654	0.771316	0.837468	NOA1	protein_coding
ENSG00000084093.19	910.399	0.157627	0.0521783	3.02094	0.00251994	0.00796169	REST	protein_coding
ENSG00000084110.11	6190.66	-0.0685743	0.212718	-0.322373	0.747171	0.818326	HAL	protein_coding
ENSG00000084112.15	1312.48	0.111805	0.0553053	2.0216	0.0432181	0.0878195	SSH1	protein_coding
ENSG00000084207.18	1657.15	0.528991	0.151559	3.49033	0.000482424	0.00191352	GSTP1	protein_coding
ENSG00000084234.18	26515.3	-0.0562757	0.06161	-0.913418	0.361023	0.476686	APLP2	protein_coding
ENSG00000084444.14	218.877	0.00833152	0.0837419	0.0994905	0.920749	0.948035	FAM234B	protein_coding
ENSG00000084453.16	295.794	-0.337028	0.177951	-1.89394	0.0582334	0.112348	SLCO1A2	protein_coding
ENSG00000084463.8	2545.48	0.157564	0.0458526	3.43631	0.000589703	0.00227375	WBP11	protein_coding
ENSG00000084623.12	7403.55	-0.125033	0.0630472	-1.98316	0.0473493	0.0948193	EIF3I	protein_coding
ENSG00000084628.10	6.38469	0.66683	0.271006	2.46058	0.0138714	0.0339707	NKAIN1	protein_coding
ENSG00000084636.18	483.375	0.265415	0.177539	1.49496	0.134924	0.220371	COL16A1	protein_coding
ENSG00000084652.16	3470.4	0.0178072	0.0542271	0.328382	0.742623	0.814456	TXLNA	protein_coding
ENSG00000084674.15	216403	-0.299349	0.109478	-2.73434	0.00625061	0.017353	APOB	protein_coding
ENSG00000084676.15	1465.84	0.0908563	0.0553788	1.64063	0.100873	0.174616	NCOA1	protein_coding
ENSG00000084693.16	950.107	0.309708	0.0673228	4.60034	4.218e-06	2.93518e-05	AGBL5	protein_coding
ENSG00000084710.14	33.7365	0.371803	0.112186	3.31416	0.000919174	0.00334717	EFR3B	protein_coding
ENSG00000084731.15	194.483	1.02196	0.139426	7.32979	2.30512e-13	7.78197e-12	KIF3C	protein_coding
ENSG00000084733.11	4659.36	0.191061	0.0533556	3.5809	0.000342415	0.0014137	RAB10	protein_coding
ENSG00000084734.9	2336.05	-0.616985	0.130431	-4.73034	2.24148e-06	1.6716e-05	GCKR	protein_coding
ENSG00000084754.12	14230.3	-0.294288	0.0540147	-5.44829	5.08563e-08	5.66755e-07	HADHA	protein_coding
ENSG00000084764.12	825.818	-0.292015	0.0794849	-3.67384	0.00023893	0.00102902	MAPRE3	protein_coding
ENSG00000084774.14	1588.84	0.440037	0.0687702	6.39865	1.56758e-10	3.06038e-09	CAD	protein_coding
ENSG00000085063.17	8860.01	-0.369718	0.0720942	-5.12826	2.92432e-07	2.72076e-06	CD59	protein_coding
ENSG00000085117.12	1790.22	-0.168121	0.0854422	-1.96766	0.0491074	0.0976942	CD82	protein_coding
ENSG00000085185.15	625.366	0.493635	0.0910724	5.42025	5.95157e-08	6.51041e-07	BCORL1	protein_coding
ENSG00000085224.23	1383.28	0.100442	0.0647506	1.55122	0.120849	0.201527	ATRX	protein_coding
ENSG00000085231.14	659.036	-0.153557	0.0565362	-2.71609	0.00660579	0.0181624	AK6	protein_coding
ENSG00000085265.11	162.041	-0.222167	0.146339	-1.51816	0.128973	0.212399	FCN1	protein_coding
ENSG00000085274.16	461.936	0.109569	0.0396774	2.7615	0.00575367	0.0161749	MYNN	protein_coding
ENSG00000085276.19	309.55	0.572947	0.122283	4.68541	2.79401e-06	2.03539e-05	MECOM	protein_coding
ENSG00000085365.18	1184.29	-0.156337	0.0599643	-2.60716	0.00912966	0.0239046	SCAMP1	protein_coding
ENSG00000085377.15	1078.23	-0.0486091	0.0547104	-0.88848	0.374283	0.489871	PREP	protein_coding
ENSG00000085382.12	175.558	0.549257	0.0899704	6.10487	1.02885e-09	1.69606e-08	HACE1	protein_coding
ENSG00000085415.16	1135.06	0.0739633	0.0447227	1.65382	0.0981641	0.170894	SEH1L	protein_coding
ENSG00000085433.16	202.531	0.323613	0.0675601	4.79	1.66782e-06	1.28859e-05	WDR47	protein_coding
ENSG00000085449.15	975.724	0.112369	0.0495164	2.26932	0.0232486	0.0524096	WDFY1	protein_coding
ENSG00000085465.13	402.372	-0.104887	0.145241	-0.722156	0.470198	0.582975	OVGP1	protein_coding
ENSG00000085491.17	278.102	0.857151	0.146879	5.83578	5.35402e-09	7.42298e-08	SLC25A24	protein_coding
ENSG00000085511.20	738.028	0.226662	0.0534948	4.23707	2.26452e-05	0.000130021	MAP3K4	protein_coding
ENSG00000085514.16	164.897	-0.00479763	0.103676	-0.0462752	0.963091	0.975577	PILRA	protein_coding
ENSG00000085552.17	840.748	-0.11161	0.214334	-0.520727	0.602557	0.700694	IGSF9	protein_coding
ENSG00000085563.15	2842.5	-0.296458	0.150789	-1.96605	0.0492928	0.0979729	ABCB1	protein_coding
ENSG00000085644.14	336.427	0.379965	0.0837879	4.53484	5.76471e-06	3.88241e-05	ZNF213	protein_coding
ENSG00000085662.14	1305.2	0.444073	0.157068	2.82726	0.00469479	0.0136137	AKR1B1	protein_coding
ENSG00000085719.13	3923.02	-0.122602	0.0658662	-1.86138	0.0626903	0.119354	CPNE3	protein_coding
ENSG00000085721.13	1504.88	-0.229942	0.0571235	-4.02534	5.68926e-05	0.000292387	RRN3	protein_coding
ENSG00000085733.16	6543.62	0.101779	0.0592002	1.71923	0.0855719	0.153069	CTTN	protein_coding
ENSG00000085741.13	180.823	-0.381457	0.195948	-1.94673	0.0515676	0.101681	WNT11	protein_coding
ENSG00000085760.15	1867.45	-0.122484	0.0433385	-2.82623	0.00470995	0.0136531	MTIF2	protein_coding
ENSG00000085788.14	614.841	0.307269	0.0761896	4.03295	5.50819e-05	0.00028412	DDHD2	protein_coding
ENSG00000085831.15	589.673	0.71388	0.180691	3.95083	7.78792e-05	0.000385611	TTC39A	protein_coding
ENSG00000085832.17	1981.4	-0.0128515	0.046223	-0.278033	0.780987	0.844701	EPS15	protein_coding
ENSG00000085840.13	190.803	1.38757	0.109558	12.6652	9.22423e-37	2.79446e-34	ORC1	protein_coding
ENSG00000085871.9	5261.17	-0.677042	0.0805749	-8.40264	4.36568e-17	2.81293e-15	MGST2	protein_coding
ENSG00000085872.15	1074.67	0.0688054	0.0789	0.872057	0.383177	0.498888	CHERP	protein_coding
ENSG00000085978.22	1037.99	-0.0649519	0.0392233	-1.65595	0.0977312	0.170278	ATG16L1	protein_coding
ENSG00000085982.14	1888.76	-0.0388466	0.0523295	-0.742345	0.457878	0.571372	USP40	protein_coding
ENSG00000085998.14	3057.33	-0.129437	0.0556434	-2.32618	0.0200087	0.0461326	POMGNT1	protein_coding
ENSG00000085999.13	79.8406	1.95272	0.123295	15.8378	1.70714e-56	2.80752e-53	RAD54L	protein_coding
ENSG00000086015.22	1403.61	0.336317	0.0631075	5.32927	9.86071e-08	1.02359e-06	MAST2	protein_coding
ENSG00000086061.16	9287.75	-0.142971	0.0642392	-2.22561	0.0260405	0.0575906	DNAJA1	protein_coding
ENSG00000086062.13	7338.85	-0.039622	0.064503	-0.614267	0.539039	0.644808	B4GALT1	protein_coding
ENSG00000086065.14	2093.01	-0.0615853	0.0473737	-1.29999	0.193605	0.293956	CHMP5	protein_coding
ENSG00000086102.19	1922.69	-0.0206594	0.0491675	-0.420184	0.674351	0.760544	NFX1	protein_coding
ENSG00000086159.13	80.9095	-2.03277	0.314778	-6.45778	1.06252e-10	2.14718e-09	AQP6	protein_coding
ENSG00000086189.10	238.872	0.179977	0.0833195	2.16008	0.0307662	0.0661378	DIMT1	protein_coding
ENSG00000086200.17	617.845	-0.094129	0.0409277	-2.29988	0.0214547	0.0489924	IPO11	protein_coding
ENSG00000086205.18	593.733	-0.546975	0.136789	-3.99869	6.36933e-05	0.000323155	FOLH1	protein_coding
ENSG00000086232.13	8207.93	-0.0990789	0.0431549	-2.29589	0.0216822	0.0494268	EIF2AK1	protein_coding
ENSG00000086288.12	6.07239	-0.166261	0.167791	-0.990883	0.321743	0.43711	NME8	protein_coding
ENSG00000086289.12	1034.29	-0.137576	0.116856	-1.17732	0.239068	0.346663	EPDR1	protein_coding
ENSG00000086300.16	1431.44	-0.0170069	0.118375	-0.14367	0.885761	0.922404	SNX10	protein_coding
ENSG00000086475.15	2517.15	0.118571	0.0434564	2.7285	0.00636223	0.0176175	SEPHS1	protein_coding
ENSG00000086504.17	3394.39	-0.569897	0.0799925	-7.12437	1.04554e-12	3.15913e-11	MRPL28	protein_coding
ENSG00000086506.3	1.46438	0.967538	0.372995	2.59397	0.00948746	0.0246861	HBQ1	protein_coding
ENSG00000086544.3	1475.33	-0.0442773	0.0665336	-0.665489	0.505738	0.615607	ITPKC	protein_coding
ENSG00000086548.9	28.5155	1.55901	0.384783	4.05165	5.08583e-05	0.000265043	CEACAM6	protein_coding
ENSG00000086570.12	9.40666	0.483169	0.153212	3.1536	0.0016127	0.00543803	FAT2	protein_coding
ENSG00000086589.12	1623.17	-0.1146	0.0433161	-2.64566	0.00815309	0.0217174	RBM22	protein_coding
ENSG00000086598.11	12642.3	-0.0120825	0.0451061	-0.267869	0.7888	0.850568	TMED2	protein_coding
ENSG00000086619.14	2001.34	0.0304653	0.114934	0.265069	0.790956	0.852361	ERO1B	protein_coding
ENSG00000086666.19	2806.92	-0.0342654	0.0407105	-0.841684	0.399965	0.515498	ZFAND6	protein_coding
ENSG00000086696.11	4038.05	-0.507916	0.146025	-3.47829	0.000504632	0.00198949	HSD17B2	protein_coding
ENSG00000086712.13	625.063	0.283578	0.0640688	4.42614	9.59338e-06	6.10385e-05	TXLNG	protein_coding
ENSG00000086717.18	8.6818	0.163384	0.181373	0.900816	0.367686	0.483307	PPEF1	protein_coding
ENSG00000086730.17	323.715	0.113363	0.11005	1.03011	0.302959	0.417551	LAT2	protein_coding
ENSG00000086758.16	6291.94	0.184244	0.0443022	4.1588	3.19927e-05	0.00017594	HUWE1	protein_coding
ENSG00000086827.9	677.46	0.100688	0.0426195	2.36248	0.0181529	0.0426006	ZW10	protein_coding
ENSG00000086848.15	339.641	0.0402934	0.0703382	0.572853	0.566745	0.669555	ALG9	protein_coding
ENSG00000086967.10	4.68025	0.389252	0.213676	1.82169	0.0685022	0.127943	MYBPC2	protein_coding
ENSG00000086991.13	68.8634	-0.135524	0.117862	-1.14986	0.250203	0.359016	NOX4	protein_coding
ENSG00000087008.16	1095.95	-0.223211	0.0691282	-3.22895	0.00124248	0.00434622	ACOX3	protein_coding
ENSG00000087053.20	528.101	0.522082	0.0746406	6.99462	2.65985e-12	7.33768e-11	MTMR2	protein_coding
ENSG00000087074.8	1733.2	-0.0784065	0.0860935	-0.910713	0.362446	0.478042	PPP1R15A	protein_coding
ENSG00000087076.9	1691.16	-0.322971	0.180589	-1.78843	0.0737062	0.135768	HSD17B14	protein_coding
ENSG00000087077.14	3413.2	-0.156548	0.0977129	-1.60212	0.10913	0.185724	TRIP6	protein_coding
ENSG00000087085.16	322.026	0.208256	0.201747	1.03226	0.301948	0.416374	ACHE	protein_coding
ENSG00000087086.15	547618	-0.516196	0.116405	-4.43449	9.22894e-06	5.89696e-05	FTL	protein_coding
ENSG00000087087.20	3527.92	0.225991	0.0418128	5.40484	6.4865e-08	7.03131e-07	SRRT	protein_coding
ENSG00000087088.20	2593.77	-0.0516363	0.0775015	-0.666262	0.505244	0.615163	BAX	protein_coding
ENSG00000087095.13	959.937	-0.0288915	0.047018	-0.614479	0.538899	0.644685	NLK	protein_coding
ENSG00000087111.21	957.825	0.52028	0.0703379	7.39687	1.39434e-13	4.8938e-12	PIGS	protein_coding
ENSG00000087116.16	825.777	-0.265765	0.1607	-1.65379	0.0981696	0.170895	ADAMTS2	protein_coding
ENSG00000087128.10	1.25443	0.442397	0.355753	1.24355	0.213664	0.3176	TMPRSS11E	protein_coding
ENSG00000087152.15	2000.21	0.354605	0.0539736	6.56997	5.03247e-11	1.08694e-09	ATXN7L3	protein_coding
ENSG00000087157.19	556.455	0.273235	0.046778	5.84109	5.18592e-09	7.22182e-08	PGS1	protein_coding
ENSG00000087191.13	5818.19	-0.370018	0.0745179	-4.96549	6.8528e-07	5.82783e-06	PSMC5	protein_coding
ENSG00000087206.17	645.073	0.18036	0.0418437	4.31032	1.63021e-05	9.75226e-05	UIMC1	protein_coding
ENSG00000087237.12	286.899	-1.12611	0.140739	-8.00143	1.22981e-15	6.37727e-14	CETP	protein_coding
ENSG00000087245.13	1461.85	-0.433186	0.162666	-2.66305	0.00774368	0.0207943	MMP2	protein_coding
ENSG00000087250.9	28.4077	-0.878295	0.338647	-2.59354	0.0094993	0.0247076	MT3	protein_coding
ENSG00000087253.13	417.098	-0.24418	0.141686	-1.72339	0.0848181	0.151926	LPCAT2	protein_coding
ENSG00000087258.16	418.903	-0.816643	0.204919	-3.9852	6.74223e-05	0.000339679	GNAO1	protein_coding
ENSG00000087263.17	946.125	-0.128337	0.0480646	-2.67009	0.00758314	0.0204252	OGFOD1	protein_coding
ENSG00000087266.17	1854.5	-0.213019	0.0825911	-2.5792	0.00990299	0.0255919	SH3BP2	protein_coding
ENSG00000087269.16	1051.13	-0.0752959	0.0493732	-1.52504	0.12725	0.210072	NOP14	protein_coding
ENSG00000087274.17	6458.7	0.0199344	0.0475407	0.419312	0.674988	0.761014	ADD1	protein_coding
ENSG00000087299.12	451.977	-0.0470348	0.0822755	-0.571675	0.567542	0.670227	L2HGDH	protein_coding
ENSG00000087301.9	477.615	0.279254	0.0800309	3.48933	0.000484237	0.00191961	TXNDC16	protein_coding
ENSG00000087302.9	3575.13	-0.239687	0.0525307	-4.5628	5.04764e-06	3.43904e-05	RTRAF	protein_coding
ENSG00000087303.18	235.135	0.316849	0.148247	2.1373	0.0325734	0.0693176	NID2	protein_coding
ENSG00000087338.5	948.45	0.396377	0.0630496	6.28674	3.24194e-10	5.91149e-09	GMCL1	protein_coding
ENSG00000087365.16	7528.09	0.0920671	0.0352522	2.61167	0.00901002	0.0236267	SF3B2	protein_coding
ENSG00000087448.11	638.432	0.476321	0.0667207	7.13902	9.39962e-13	2.87025e-11	KLHL42	protein_coding
ENSG00000087460.27	28192.8	0.175333	0.0767753	2.28372	0.0223878	0.0507505	GNAS	protein_coding
ENSG00000087470.18	1569.19	0.281746	0.0481324	5.85355	4.81175e-09	6.75249e-08	DNM1L	protein_coding
ENSG00000087494.16	74.4682	1.42923	0.23599	6.05632	1.39273e-09	2.23407e-08	PTHLH	protein_coding
ENSG00000087495.17	4.50912	-0.221204	0.202488	-1.09243	0.274644	0.386453	PHACTR3	protein_coding
ENSG00000087502.18	1108.99	0.112786	0.0560996	2.01046	0.0443823	0.0898025	ERGIC2	protein_coding
ENSG00000087510.7	13.6154	-0.412445	0.312192	-1.32113	0.186459	0.285428	TFAP2C	protein_coding
ENSG00000087586.18	921.704	0.787473	0.104986	7.50076	6.3447e-14	2.36392e-12	AURKA	protein_coding
ENSG00000087589.16	66.4085	-0.526306	0.112705	-4.66977	3.01534e-06	2.17634e-05	CASS4	protein_coding
ENSG00000087842.11	1534.49	-0.375182	0.111456	-3.36617	0.000762191	0.00284604	PIR	protein_coding
ENSG00000087884.14	293.924	-0.46212	0.0821421	-5.62586	1.84583e-08	2.27588e-07	AAMDC	protein_coding
ENSG00000087903.13	155.172	0.319012	0.0922415	3.45845	0.000543299	0.00212215	RFX2	protein_coding
ENSG00000087995.16	767.42	-0.080515	0.0549757	-1.46456	0.143042	0.231246	METTL2A	protein_coding
ENSG00000088002.12	22.2582	-1.3783	0.244287	-5.64212	1.67967e-08	2.08966e-07	SULT2B1	protein_coding
ENSG00000088035.18	621.795	0.0771162	0.0504229	1.52939	0.126168	0.208635	ALG6	protein_coding
ENSG00000088038.19	1289.6	0.338507	0.0472498	7.1642	7.82398e-13	2.42775e-11	CNOT3	protein_coding
ENSG00000088053.11	3.73517	-0.659147	0.186513	-3.53405	0.00040925	0.00165579	GP6	protein_coding
ENSG00000088179.9	529.103	-0.0363278	0.0549261	-0.661395	0.508359	0.61795	PTPN4	protein_coding
ENSG00000088205.13	2222.36	0.16727	0.0467816	3.57555	0.000349494	0.00144104	DDX18	protein_coding
ENSG00000088247.17	5469.37	0.240997	0.0465318	5.17919	2.22853e-07	2.13021e-06	KHSRP	protein_coding
ENSG00000088256.9	1822.91	-0.0872295	0.0440486	-1.9803	0.0476695	0.095328	GNA11	protein_coding
ENSG00000088280.19	974.001	0.0473978	0.103097	0.459741	0.645702	0.737018	ASAP3	protein_coding
ENSG00000088298.13	2121.74	-0.0346799	0.0500709	-0.692616	0.488551	0.599777	EDEM2	protein_coding
ENSG00000088305.18	141.073	1.06951	0.102003	10.485	1.01196e-25	1.5886e-23	DNMT3B	protein_coding
ENSG00000088320.4	25.2742	-0.57242	0.137045	-4.17689	2.95522e-05	0.000164007	REM1	protein_coding
ENSG00000088325.16	1416.43	1.58024	0.0994136	15.8956	6.79251e-57	1.23466e-53	TPX2	protein_coding
ENSG00000088340.17	161.755	0.823359	0.207788	3.96248	7.41738e-05	0.000369063	FER1L4	transcribed_unitary_pseudogene
ENSG00000088356.6	924.279	0.0410817	0.0656601	0.625673	0.53153	0.638013	PDRG1	protein_coding
ENSG00000088367.23	2421.96	0.517267	0.191761	2.69745	0.00698724	0.0190519	EPB41L1	protein_coding
ENSG00000088386.17	1158.75	0.291043	0.176693	1.64717	0.0995237	0.172773	SLC15A1	protein_coding
ENSG00000088387.19	961.89	0.105231	0.08521	1.23496	0.216846	0.321319	DOCK9	protein_coding
ENSG00000088448.14	2130.29	0.118038	0.066319	1.77985	0.0751	0.137785	ANKRD10	protein_coding
ENSG00000088451.11	606.779	-0.004084	0.098767	-0.0413498	0.967017	0.97832	TGDS	protein_coding
ENSG00000088538.13	23.2204	0.845902	0.144147	5.86833	4.40195e-09	6.23056e-08	DOCK3	protein_coding
ENSG00000088543.15	314.594	-0.045635	0.0961328	-0.474708	0.634995	0.728288	C3orf18	protein_coding
ENSG00000088682.14	2154.92	-0.393515	0.0766751	-5.13224	2.86319e-07	2.66675e-06	COQ9	protein_coding
ENSG00000088726.16	26.6417	-0.761112	0.239477	-3.17823	0.00148178	0.00506039	TMEM40	protein_coding
ENSG00000088727.13	170.362	-0.343591	0.07888	-4.35586	1.32543e-05	8.10894e-05	KIF9	protein_coding
ENSG00000088756.13	61.6351	0.531799	0.165952	3.20454	0.00135278	0.00467462	ARHGAP28	protein_coding
ENSG00000088766.12	106.559	-0.370306	0.0942389	-3.92943	8.51461e-05	0.000416753	CRLS1	protein_coding
ENSG00000088782.5	0.00195619	-0.387858	2.89314	-0.134061	0.893354		DEFB127	protein_coding
ENSG00000088808.18	921.102	0.132816	0.0604485	2.19717	0.0280082	0.0611088	PPP1R13B	protein_coding
ENSG00000088812.18	9553.78	0.0680449	0.0863067	0.788407	0.430458	0.545073	ATRN	protein_coding
ENSG00000088826.18	562.422	0.348776	0.132969	2.62299	0.00871615	0.022977	SMOX	protein_coding
ENSG00000088827.12	501.563	-0.189964	0.126385	-1.50307	0.132822	0.217503	SIGLEC1	protein_coding
ENSG00000088832.18	5804.58	-0.18304	0.0663695	-2.7579	0.00581741	0.0163262	FKBP1A	protein_coding
ENSG00000088833.17	3841.05	-0.107241	0.0526853	-2.03549	0.0418012	0.0854027	NSFL1C	protein_coding
ENSG00000088836.14	99.3641	0.834784	0.209351	3.98749	6.67765e-05	0.000336769	SLC4A11	protein_coding
ENSG00000088854.12	409.363	0.202521	0.0879644	2.3023	0.0213181	0.0487255	C20orf194	protein_coding
ENSG00000088876.13	327.283	0.10072	0.0539903	1.86552	0.0621086	0.118462	ZNF343	protein_coding
ENSG00000088881.21	466.529	-0.0926157	0.166547	-0.556094	0.578147	0.679631	EBF4	protein_coding
ENSG00000088882.8	157.735	-0.302748	0.169754	-1.78346	0.0745118	0.136953	CPXM1	protein_coding
ENSG00000088888.18	3513.14	0.111638	0.06147	1.81614	0.0693496	0.129219	MAVS	protein_coding
ENSG00000088899.15	892.072	0.254522	0.08891	2.8627	0.00420054	0.0123706	LZTS3	protein_coding
ENSG00000088926.14	2612.03	-0.450063	0.135283	-3.32683	0.000878397	0.00322042	F11	protein_coding
ENSG00000088930.8	2598.01	0.0826751	0.0514039	1.60834	0.10776	0.183919	XRN2	protein_coding
ENSG00000088970.16	677.776	-0.146562	0.0870431	-1.68379	0.0922232	0.162543	KIZ	protein_coding
ENSG00000088986.11	6220.16	-0.0788932	0.058042	-1.35924	0.17407	0.270125	DYNLL1	protein_coding
ENSG00000088992.18	1445.98	-0.0760969	0.223214	-0.340914	0.733168	0.807317	TESC	protein_coding
ENSG00000089006.17	2949.55	0.07169	0.047942	1.49535	0.134823	0.220258	SNX5	protein_coding
ENSG00000089009.15	24128	-0.105369	0.0718507	-1.4665	0.142511	0.230625	RPL6	protein_coding
ENSG00000089012.14	72.8928	0.448727	0.175762	2.55303	0.0106789	0.0272644	SIRPG	protein_coding
ENSG00000089022.14	1035.63	0.163773	0.0358102	4.57335	4.79982e-06	3.2949e-05	MAPKAPK5	protein_coding
ENSG00000089041.17	171.908	0.497231	0.142083	3.49958	0.000465997	0.0018539	P2RX7	protein_coding
ENSG00000089048.14	773.489	0.265818	0.06372	4.17166	3.0239e-05	0.000167335	ESF1	protein_coding
ENSG00000089050.16	1383.93	-0.250841	0.0767347	-3.26893	0.00107955	0.0038472	RBBP9	protein_coding
ENSG00000089053.13	4290.73	0.138773	0.0391234	3.54705	0.000389568	0.00158508	ANAPC5	protein_coding
ENSG00000089057.15	3787.17	-0.708433	0.113832	-6.22349	4.8623e-10	8.58071e-09	SLC23A2	protein_coding
ENSG00000089060.11	1250.63	-0.0639735	0.0765996	-0.835168	0.403623	0.518997	SLC8B1	protein_coding
ENSG00000089063.15	5514.69	-0.134399	0.0515837	-2.60545	0.0091755	0.0239955	TMEM230	protein_coding
ENSG00000089091.16	48.8006	0.341878	0.085284	4.0087	6.10549e-05	0.000311185	DZANK1	protein_coding
ENSG00000089094.19	731.335	0.137859	0.0589602	2.33817	0.0193784	0.0449042	KDM2B	protein_coding
ENSG00000089101.19	4.43863	0.364109	0.204334	1.78193	0.07476	0.137299	CFAP61	protein_coding
ENSG00000089116.4	0.645899	0.990802	0.362277	2.73493	0.00623936	0.0173245	LHX5	protein_coding
ENSG00000089123.16	219.609	0.250121	0.0628305	3.98089	6.86575e-05	0.000344895	TASP1	protein_coding
ENSG00000089127.14	1802.25	-0.449063	0.113496	-3.95663	7.60144e-05	0.000377352	OAS1	protein_coding
ENSG00000089154.11	4058.2	0.222256	0.0467968	4.74937	2.04048e-06	1.54134e-05	GCN1	protein_coding
ENSG00000089157.16	56798.4	-0.0675387	0.0830519	-0.81321	0.416098	0.531264	RPLP0	protein_coding
ENSG00000089159.16	922.638	0.0390729	0.0465649	0.839106	0.40141	0.516971	PXN	protein_coding
ENSG00000089163.4	126.642	-0.138462	0.0760499	-1.82067	0.0686565	0.12815	SIRT4	protein_coding
ENSG00000089169.15	2.89704	0.0704582	0.1716	0.410595	0.681369	0.766208	RPH3A	protein_coding
ENSG00000089177.19	765.499	0.0705242	0.071504	0.986297	0.323987	0.43931	KIF16B	protein_coding
ENSG00000089195.15	640.957	0.286063	0.0531178	5.38544	7.22679e-08	7.73822e-07	TRMT6	protein_coding
ENSG00000089199.10	13.4963	0.247177	0.314029	0.787117	0.431213	0.545768	CHGB	protein_coding
ENSG00000089220.5	62080.6	-0.637929	0.0835736	-7.63315	2.29088e-14	9.21836e-13	PEBP1	protein_coding
ENSG00000089225.20	0.96951	-0.59202	0.37209	-1.59107	0.111594	0.189127	TBX5	protein_coding
ENSG00000089234.16	809.782	0.041218	0.0354705	1.16204	0.245221	0.353373	BRAP	protein_coding
ENSG00000089248.7	9910.79	-0.155369	0.0598672	-2.59522	0.0094529	0.0246259	ERP29	protein_coding
ENSG00000089250.19	5.40189	-1.21882	0.245566	-4.96333	6.92958e-07	5.88444e-06	NOS1	protein_coding
ENSG00000089280.19	6215.15	0.29204	0.0542993	5.37834	7.51754e-08	8.02304e-07	FUS	protein_coding
ENSG00000089289.16	1340.34	-0.183704	0.0621751	-2.95462	0.00313055	0.00960183	IGBP1	protein_coding
ENSG00000089327.15	1469.1	0.00300499	0.118284	0.0254049	0.979732	0.986596	FXYD5	protein_coding
ENSG00000089335.21	869.781	0.109036	0.0623925	1.74757	0.0805378	0.145824	ZNF302	protein_coding
ENSG00000089351.14	2233.94	0.2944	0.106229	2.77138	0.00558198	0.0157525	GRAMD1A	protein_coding
ENSG00000089356.18	4.09562	1.62841	0.275188	5.91743	3.27005e-09	4.77928e-08	FXYD3	protein_coding
ENSG00000089472.16	215.659	-0.300462	0.133164	-2.25633	0.0240503	0.0539351	HEPH	protein_coding
ENSG00000089486.17	2290.96	-0.331391	0.0674267	-4.91483	8.88581e-07	7.33287e-06	CDIP1	protein_coding
ENSG00000089505.18	8.58014	0.726786	0.123133	5.90243	3.58192e-09	5.18245e-08	CMTM1	protein_coding
ENSG00000089558.9	23.9715	0.197784	0.166647	1.18685	0.235289	0.342274	KCNH4	protein_coding
ENSG00000089597.18	18309.5	0.0810029	0.0433573	1.86826	0.0617253	0.117854	GANAB	protein_coding
ENSG00000089639.11	441.865	0.369411	0.0833067	4.43435	9.23522e-06	5.89988e-05	GMIP	protein_coding
ENSG00000089682.16	338.275	0.104518	0.0642667	1.62632	0.103882	0.17874	RBM41	protein_coding
ENSG00000089685.15	1191.58	1.09887	0.136507	8.04992	8.28462e-16	4.40859e-14	BIRC5	protein_coding
ENSG00000089692.9	240.467	0.284774	0.170652	1.66874	0.0951681	0.166619	LAG3	protein_coding
ENSG00000089693.11	10312.5	-0.29424	0.0524367	-5.61134	2.00768e-08	2.45181e-07	MLF2	protein_coding
ENSG00000089723.10	107.95	-0.0187138	0.0959867	-0.194962	0.845423	0.893136	OTUB2	protein_coding
ENSG00000089737.17	4254.07	-0.229662	0.0481491	-4.7698	1.84408e-06	1.40807e-05	DDX24	protein_coding
ENSG00000089775.12	372.317	-0.0119454	0.0586379	-0.203714	0.838577	0.887623	ZBTB25	protein_coding
ENSG00000089818.18	760.06	-0.066218	0.0481853	-1.37424	0.169368	0.264427	NECAP1	protein_coding
ENSG00000089820.16	1256.18	0.0371448	0.124034	0.299473	0.76458	0.832115	ARHGAP4	protein_coding
ENSG00000089847.12	251.68	-0.716636	0.10695	-6.70064	2.07503e-11	4.84866e-10	ANKRD24	protein_coding
ENSG00000089876.12	581.581	0.172927	0.0962784	1.79611	0.0724763	0.133917	DHX32	protein_coding
ENSG00000089902.10	954.384	0.145654	0.0556414	2.61773	0.00885166	0.0232773	RCOR1	protein_coding
ENSG00000089916.18	551.594	0.299724	0.0568444	5.2727	1.3443e-07	1.34923e-06	GPATCH2L	protein_coding
ENSG00000090006.18	1740.95	-0.282393	0.137692	-2.0509	0.0402771	0.0828032	LTBP4	protein_coding
ENSG00000090013.11	8167.07	-0.601864	0.0923899	-6.51439	7.29835e-11	1.52208e-09	BLVRB	protein_coding
ENSG00000090020.11	461.939	0.131798	0.0957865	1.37596	0.168835	0.263805	SLC9A1	protein_coding
ENSG00000090054.15	1244.03	0.223751	0.0547	4.09052	4.30413e-05	0.000229005	SPTLC1	protein_coding
ENSG00000090060.18	5369.46	0.131829	0.0413722	3.1864	0.00144054	0.00493899	PAPOLA	protein_coding
ENSG00000090061.17	126.571	0.48395	0.114239	4.23628	2.27255e-05	0.000130368	CCNK	protein_coding
ENSG00000090097.22	1227.59	0.0437856	0.0799647	0.547562	0.583993	0.684626	PCBP4	protein_coding
ENSG00000090104.12	908.526	0.656208	0.169802	3.86455	0.000111294	0.000527103	RGS1	protein_coding
ENSG00000090238.12	1820.47	-0.369317	0.0719061	-5.13611	2.8049e-07	2.61811e-06	YPEL3	protein_coding
ENSG00000090263.16	1858.2	-0.383224	0.0627879	-6.10347	1.03793e-09	1.70939e-08	MRPS33	protein_coding
ENSG00000090266.13	2686.15	-0.588257	0.0821325	-7.1623	7.93365e-13	2.45957e-11	NDUFB2	protein_coding
ENSG00000090273.14	6561.7	-0.212649	0.0755063	-2.8163	0.00485798	0.0140175	NUDC	protein_coding
ENSG00000090316.16	1898.33	0.0761766	0.0482561	1.57859	0.11443	0.192926	MAEA	protein_coding
ENSG00000090339.9	2213.59	0.312956	0.132063	2.36974	0.0178008	0.0419236	ICAM1	protein_coding
ENSG00000090372.15	2328.46	0.240372	0.0466546	5.15216	2.57507e-07	2.42206e-06	STRN4	protein_coding
ENSG00000090376.11	123.146	-0.143875	0.129886	-1.1077	0.267991	0.379073	IRAK3	protein_coding
ENSG00000090382.7	9422.87	0.332349	0.218258	1.52274	0.127824	0.210848	LYZ	protein_coding
ENSG00000090402.8	7.34824	2.91418	0.486012	5.9961	2.02115e-09	3.11201e-08	SI	protein_coding
ENSG00000090432.7	1457.57	-0.22388	0.0512937	-4.36467	1.27316e-05	7.82241e-05	MUL1	protein_coding
ENSG00000090447.12	419.843	0.151055	0.0627914	2.40567	0.016143	0.0385903	TFAP4	protein_coding
ENSG00000090470.15	593.142	0.261967	0.0383806	6.82549	8.76254e-12	2.17402e-10	PDCD7	protein_coding
ENSG00000090487.11	4395.46	-0.11331	0.0451539	-2.50942	0.012093	0.0302794	SPG21	protein_coding
ENSG00000090512.12	3692.38	-0.559953	0.206166	-2.71603	0.00660699	0.0181642	FETUB	protein_coding
ENSG00000090520.11	2154.78	0.149576	0.0543572	2.75172	0.00592829	0.0165969	DNAJB11	protein_coding
ENSG00000090530.10	170.234	0.243652	0.143828	1.69405	0.0902564	0.159638	P3H2	protein_coding
ENSG00000090534.20	842.32	-0.252885	0.101022	-2.50327	0.012305	0.0307296	THPO	protein_coding
ENSG00000090539.15	1750.95	-0.180171	0.121403	-1.48407	0.137791	0.224289	CHRD	protein_coding
ENSG00000090554.13	3.94342	-0.085648	0.125966	-0.679929	0.49655	0.60734	FLT3LG	protein_coding
ENSG00000090565.17	1754.52	-0.130521	0.0653861	-1.99616	0.0459169	0.0924333	RAB11FIP3	protein_coding
ENSG00000090581.10	3967.51	-0.478673	0.0641378	-7.4632	8.44484e-14	3.08625e-12	GNPTG	protein_coding
ENSG00000090612.22	673.155	0.0263509	0.0704856	0.373849	0.708517	0.787859	ZNF268	protein_coding
ENSG00000090615.15	2654.19	0.095577	0.046711	2.04614	0.040743	0.0835869	GOLGA3	protein_coding
ENSG00000090621.15	4667.8	0.0285476	0.0596783	0.478357	0.632396	0.72603	PABPC4	protein_coding
ENSG00000090659.18	176.146	0.00887481	0.140221	0.0632916	0.949534	0.966835	CD209	protein_coding
ENSG00000090661.12	3677.27	-0.532381	0.0965838	-5.51212	3.54546e-08	4.09518e-07	CERS4	protein_coding
ENSG00000090674.16	1113.76	-0.211581	0.0599472	-3.52946	0.000416403	0.00168119	MCOLN1	protein_coding
ENSG00000090686.16	1324.42	0.174601	0.043534	4.01069	6.05415e-05	0.000308842	USP48	protein_coding
ENSG00000090776.6	1175.17	0.0745607	0.0845524	0.881828	0.37787	0.493518	EFNB1	protein_coding
ENSG00000090857.14	598.789	0.0144453	0.0739718	0.195281	0.845173	0.892982	PDPR	protein_coding
ENSG00000090861.17	8042.85	-0.165055	0.0631489	-2.61374	0.00895564	0.0235114	AARS1	protein_coding
ENSG00000090863.12	4986.01	0.108808	0.0521379	2.08693	0.0368947	0.0768839	GLG1	protein_coding
ENSG00000090889.12	533.12	1.64562	0.11602	14.1839	1.15298e-45	6.98584e-43	KIF4A	protein_coding
ENSG00000090905.19	1716.19	-0.0450937	0.0627995	-0.718059	0.472721	0.584986	TNRC6A	protein_coding
ENSG00000090924.15	707.241	0.545598	0.0862875	6.32302	2.56504e-10	4.77555e-09	PLEKHG2	protein_coding
ENSG00000090932.11	3.15234	1.15991	0.301469	3.84752	0.000119319	0.000560274	DLL3	protein_coding
ENSG00000090971.5	358.565	-0.0126538	0.130146	-0.0972281	0.922545	0.949236	NAT14	protein_coding
ENSG00000090975.13	1345.24	-0.27279	0.0936399	-2.91318	0.0035777	0.0107733	PITPNM2	protein_coding
ENSG00000090989.18	489.697	0.113765	0.0516967	2.20062	0.0277632	0.0606546	EXOC1	protein_coding
ENSG00000091009.8	668.955	-0.000370118	0.037999	-0.0097402	0.992229	0.994895	RBM27	protein_coding
ENSG00000091010.6	2.7575	-0.0666168	0.141614	-0.470412	0.638061	0.730892	POU4F3	protein_coding
ENSG00000091039.17	1178.97	0.138191	0.0724769	1.90669	0.0565606	0.109771	OSBPL8	protein_coding
ENSG00000091073.19	598.449	-0.024088	0.0640585	-0.376032	0.706893	0.786789	DTX2	protein_coding
ENSG00000091106.19	62.0787	0.0138513	0.078984	0.175368	0.86079	0.904322	NLRC4	protein_coding
ENSG00000091127.14	550.331	0.395379	0.0661485	5.97713	2.27101e-09	3.46422e-08	PUS7	protein_coding
ENSG00000091128.13	10.0461	0.134045	0.14476	0.925981	0.354456	0.470212	LAMB4	protein_coding
ENSG00000091129.21	575.059	-0.253637	0.260298	-0.974408	0.329854	0.445316	NRCAM	protein_coding
ENSG00000091136.15	3518.8	0.554556	0.118369	4.68496	2.80013e-06	2.0389e-05	LAMB1	protein_coding
ENSG00000091137.14	11.5384	-0.440651	0.115597	-3.81196	0.00013787	0.000635201	SLC26A4	protein_coding
ENSG00000091138.13	93.4374	-0.106757	0.257874	-0.413991	0.678881	0.764176	SLC26A3	protein_coding
ENSG00000091140.14	3801.24	-0.188596	0.0664207	-2.83941	0.00451966	0.0131867	DLD	protein_coding
ENSG00000091157.14	586.51	-0.150928	0.0594345	-2.5394	0.0111043	0.028186	WDR7	protein_coding
ENSG00000091164.13	3226.57	-0.174652	0.0530142	-3.29443	0.000986205	0.00355639	TXNL1	protein_coding
ENSG00000091181.20	3.05463	-0.544798	0.187308	-2.90856	0.00363097	0.0109107	IL5RA	protein_coding
ENSG00000091262.16	6297.36	-0.521886	0.0976496	-5.34448	9.06777e-08	9.48984e-07	ABCC6	protein_coding
ENSG00000091317.8	3359.91	-0.00852301	0.0719717	-0.118422	0.905733	0.936904	CMTM6	protein_coding
ENSG00000091409.15	2959.84	-0.0614856	0.0929035	-0.661822	0.508085	0.617752	ITGA6	protein_coding
ENSG00000091428.18	869.549	-0.0113367	0.1059	-0.107051	0.914748	0.943629	RAPGEF4	protein_coding
ENSG00000091436.17	1861.91	0.0074408	0.0828709	0.0897878	0.928456	0.952669	MAP3K20	protein_coding
ENSG00000091482.8	55.4637	-0.933203	0.251474	-3.71093	0.000206498	0.00090434	SMPX	protein_coding
ENSG00000091483.7	11083.7	-0.431994	0.0839457	-5.14612	2.65931e-07	2.49639e-06	FH	protein_coding
ENSG00000091490.11	1747.49	0.851306	0.169934	5.00962	5.45371e-07	4.7467e-06	SEL1L3	protein_coding
ENSG00000091513.16	316072	-0.399591	0.138604	-2.88296	0.00393957	0.0117119	TF	protein_coding
ENSG00000091527.16	5707.45	0.181246	0.0418612	4.32968	1.49325e-05	9.02218e-05	CDV3	protein_coding
ENSG00000091536.19	37.6	-0.382323	0.136655	-2.79773	0.00514639	0.0147181	MYO15A	protein_coding
ENSG00000091542.9	3557.53	-0.142601	0.0596806	-2.38941	0.0168754	0.0400722	ALKBH5	protein_coding
ENSG00000091583.11	199193	-0.784454	0.135794	-5.77681	7.61283e-09	1.02863e-07	APOH	protein_coding
ENSG00000091592.16	480.956	-0.0361722	0.126909	-0.285024	0.775626	0.84072	NLRP1	protein_coding
ENSG00000091622.16	37.9769	0.449159	0.185098	2.4266	0.015241	0.0367881	PITPNM3	protein_coding
ENSG00000091640.8	1794.19	-0.578305	0.0717993	-8.05446	7.98292e-16	4.27439e-14	SPAG7	protein_coding
ENSG00000091651.9	156.46	1.43141	0.110352	12.9713	1.78073e-38	5.85707e-36	ORC6	protein_coding
ENSG00000091656.19	504.75	0.0614212	0.116911	0.525366	0.599329	0.697927	ZFHX4	protein_coding
ENSG00000091664.9	0.183044	-0.283222	0.697506	-0.40605	0.684706		SLC17A6	protein_coding
ENSG00000091704.10	5.55086	1.18945	0.342023	3.47769	0.000505747	0.00199321	CPA1	protein_coding
ENSG00000091732.17	816.931	-0.102621	0.0528283	-1.94255	0.0520711	0.102527	ZC3HC1	protein_coding
ENSG00000091831.24	401.55	-1.60236	0.192914	-8.30607	9.89205e-17	6.13343e-15	ESR1	protein_coding
ENSG00000091844.8	18.8937	0.788888	0.134427	5.86854	4.39663e-09	6.22954e-08	RGS17	protein_coding
ENSG00000091879.14	331.037	0.167358	0.114809	1.4577	0.144923	0.233714	ANGPT2	protein_coding
ENSG00000091947.10	1809.74	-0.0900856	0.073048	-1.23324	0.217487	0.321965	TMEM101	protein_coding
ENSG00000091972.18	159.126	-0.199064	0.114463	-1.73911	0.0820149	0.147925	CD200	protein_coding
ENSG00000091986.16	1508	-0.573104	0.204174	-2.80694	0.00500152	0.014368	CCDC80	protein_coding
ENSG00000092009.10	7.62999	-1.56138	0.243883	-6.40217	1.53182e-10	2.99733e-09	CMA1	protein_coding
ENSG00000092010.15	9616.06	-0.231722	0.0661425	-3.50338	0.000459397	0.00183165	PSME1	protein_coding
ENSG00000092020.10	345.872	-0.0902158	0.050728	-1.77842	0.0753348	0.138135	PPP2R3C	protein_coding
ENSG00000092036.18	380.766	-0.208724	0.0967384	-2.15761	0.030958	0.0664821	HAUS4	protein_coding
ENSG00000092051.17	18.771	-0.0953711	0.138171	-0.69024	0.490044	0.601127	JPH4	protein_coding
ENSG00000092054.13	0.860641	0.554924	0.318512	1.74224	0.0814669	0.147121	MYH7	protein_coding
ENSG00000092067.6	1.86537	0.147106	0.185769	0.791876	0.428433	0.543325	CEBPE	protein_coding
ENSG00000092068.20	290.502	0.45536	0.132209	3.44423	0.000572689	0.00221855	SLC7A8	protein_coding
ENSG00000092094.11	968.929	-0.185188	0.047687	-3.88341	0.000103004	0.000493047	OSGEP	protein_coding
ENSG00000092096.18	354.505	0.497521	0.209256	2.37758	0.0174269	0.0411665	SLC22A17	protein_coding
ENSG00000092098.17	12.3432	0.306456	0.0952092	3.21876	0.00128744	0.00448171	RNF31	protein_coding
ENSG00000092108.22	1707.9	0.00846341	0.0401804	0.210635	0.833172	0.883545	SCFD1	protein_coding
ENSG00000092140.16	328.31	0.518979	0.0579646	8.95338	3.44771e-19	2.97675e-17	G2E3	protein_coding
ENSG00000092148.13	4321.98	0.0495343	0.065269	0.758925	0.447897	0.562085	HECTD1	protein_coding
ENSG00000092199.18	11973.8	0.0945315	0.0318784	2.96538	0.00302311	0.00932197	HNRNPC	protein_coding
ENSG00000092200.12	39.5977	0.105935	0.110459	0.959039	0.337539	0.453078	RPGRIP1	protein_coding
ENSG00000092201.10	2881.45	0.304609	0.0430634	7.07351	1.51066e-12	4.42888e-11	SUPT16H	protein_coding
ENSG00000092203.15	2099.38	0.0208695	0.0360509	0.57889	0.562664	0.666169	TOX4	protein_coding
ENSG00000092208.17	203.656	0.275062	0.0570397	4.82228	1.41924e-06	1.11397e-05	GEMIN2	protein_coding
ENSG00000092295.12	21.7346	0.145142	0.11567	1.25479	0.209554	0.312768	TGM1	protein_coding
ENSG00000092330.18	1445	-0.0291941	0.0425454	-0.686189	0.492594	0.603613	TINF2	protein_coding
ENSG00000092345.14	0.862155	0.0742918	0.34547	0.215046	0.829732	0.880952	DAZL	protein_coding
ENSG00000092377.15	12.7812	0.963425	0.365713	2.63437	0.00842925	0.0223246	TBL1Y	protein_coding
ENSG00000092421.17	751.367	1.30554	0.1682	7.76186	8.36939e-15	3.66344e-13	SEMA6A	protein_coding
ENSG00000092439.16	1492.13	0.0297415	0.0877353	0.338991	0.734617	0.808448	TRPM7	protein_coding
ENSG00000092445.12	499.098	0.771542	0.17114	4.50825	6.53646e-06	4.34372e-05	TYRO3	protein_coding
ENSG00000092470.12	314.819	1.36835	0.100318	13.6402	2.30802e-42	9.96373e-40	WDR76	protein_coding
ENSG00000092529.25	113.041	-0.342955	0.152341	-2.25123	0.0243712	0.054499	CAPN3	protein_coding
ENSG00000092531.10	280.851	0.0435801	0.0541692	0.804518	0.421098	0.536149	SNAP23	protein_coding
ENSG00000092607.15	759.439	-0.0230164	0.193862	-0.118726	0.905493	0.936765	TBX15	protein_coding
ENSG00000092621.13	3558.92	0.334049	0.160164	2.08567	0.0370089	0.0771032	PHGDH	protein_coding
ENSG00000092758.18	234.55	0.343989	0.197916	1.73805	0.0822016	0.148223	COL9A3	protein_coding
ENSG00000092820.18	3879.62	0.0778749	0.0987548	0.788569	0.430364	0.545033	EZR	protein_coding
ENSG00000092841.19	17580.7	-0.417072	0.0715199	-5.83155	5.49144e-09	7.5952e-08	MYL6	protein_coding
ENSG00000092847.13	1210.76	0.185033	0.0587765	3.14807	0.00164352	0.00552416	AGO1	protein_coding
ENSG00000092850.12	4.87037	0.846687	0.194004	4.36428	1.27541e-05	7.83485e-05	TEKT2	protein_coding
ENSG00000092853.14	160.262	1.70698	0.111727	15.2782	1.06905e-52	1.19099e-49	CLSPN	protein_coding
ENSG00000092871.17	1144.81	0.16412	0.0900533	1.82248	0.0683825	0.127795	RFFL	protein_coding
ENSG00000092929.12	412.877	0.213474	0.136965	1.5586	0.11909	0.19921	UNC13D	protein_coding
ENSG00000092931.11	749.761	-0.0184425	0.0606537	-0.304062	0.76108	0.82951	MFSD11	protein_coding
ENSG00000092964.18	1748.32	-0.0345835	0.0977672	-0.353734	0.723539	0.799739	DPYSL2	protein_coding
ENSG00000092969.12	161.902	0.573446	0.168157	3.41018	0.000649207	0.00247418	TGFB2	protein_coding
ENSG00000092978.11	448.11	0.264444	0.0562791	4.6988	2.61696e-06	1.91929e-05	GPATCH2	protein_coding
ENSG00000093000.19	1907.19	0.188146	0.0548906	3.42766	0.000608807	0.00233775	NUP50	protein_coding
ENSG00000093009.11	290.347	1.26512	0.11041	11.4584	2.13356e-30	4.54844e-28	CDC45	protein_coding
ENSG00000093010.15	5973.28	-0.513471	0.0994426	-5.16349	2.42383e-07	2.29991e-06	COMT	protein_coding
ENSG00000093072.18	1493.46	0.00677162	0.119898	0.0564784	0.954961	0.970329	ADA2	protein_coding
ENSG00000093100.13	4.54444	0.163187	0.164689	0.990879	0.321745	0.43711	AC016026.1	lncRNA
ENSG00000093134.15	771.591	-0.308068	0.177336	-1.7372	0.0823514	0.148462	VNN3	protein_coding
[truncated: 58,662 more rows]

## Sheet: FC≥1，P＜0.05
id	baseMean	log2FoldChange	lfcSE	stat	pvalue	padj	gene_name	gene_type
ENSG00000003137.8	128.505	1.46267	0.220003	6.6484	2.96289e-11	6.688e-10	CYP26B1	protein_coding
ENSG00000004948.16	6.83381	1.58217	0.248488	6.36721	1.92498e-10	3.6934e-09	CALCR	protein_coding
ENSG00000005001.10	36.4331	1.68946	0.309872	5.45213	4.97708e-08	5.55733e-07	PRSS22	protein_coding
ENSG00000005073.6	13.839	1.01436	0.337196	3.00821	0.00262789	0.00825588	HOXA11	protein_coding
ENSG00000005884.18	1032.64	1.18352	0.17293	6.84394	7.70455e-12	1.93094e-10	ITGA3	protein_coding
ENSG00000006118.15	683.352	1.42943	0.172865	8.26903	1.35058e-16	8.15763e-15	TMEM132A	protein_coding
ENSG00000006128.12	1.33644	1.68575	0.533464	3.16	0.00157771	0.00533774	TAC1	protein_coding
ENSG00000006377.11	18.5793	1.48615	0.44042	3.37439	0.000739792	0.00277229	DLX6	protein_coding
ENSG00000006606.9	16.6564	1.00072	0.234431	4.26871	1.96608e-05	0.000114891	CCL26	protein_coding
ENSG00000006659.13	23.0845	6.11018	0.689068	8.86731	7.49343e-19	6.23598e-17	LGALS14	protein_coding
ENSG00000006747.15	41.9917	1.55089	0.191505	8.09844	5.56702e-16	3.03253e-14	SCIN	protein_coding
ENSG00000007038.11	15.575	2.03558	0.288374	7.05882	1.6792e-12	4.88155e-11	PRSS21	protein_coding
ENSG00000007062.12	134.521	2.00172	0.304385	6.57626	4.82435e-11	1.04395e-09	PROM1	protein_coding
ENSG00000007216.15	214.62	1.16892	0.247249	4.72771	2.27063e-06	1.69114e-05	SLC13A2	protein_coding
ENSG00000007306.15	20.4506	2.00741	0.576822	3.48011	0.000501199	0.00197776	CEACAM7	protein_coding
ENSG00000007350.17	26.0926	2.48529	0.26863	9.25172	2.20899e-20	2.1735e-18	TKTL1	protein_coding
ENSG00000007968.7	132.599	1.31574	0.119035	11.0534	2.11021e-28	3.96078e-26	E2F2	protein_coding
ENSG00000010292.13	1401.03	1.0737	0.0742548	14.4597	2.17887e-47	1.5357e-44	NCAPD2	protein_coding
ENSG00000010310.9	48.7696	1.44912	0.189435	7.6497	2.01451e-14	8.18509e-13	GIPR	protein_coding
ENSG00000010932.17	250.596	1.68419	0.234686	7.17635	7.15974e-13	2.23368e-11	FMO1	protein_coding
ENSG00000011426.11	559.448	1.84672	0.111549	16.5552	1.46816e-61	5.07043e-58	ANLN	protein_coding
ENSG00000011677.13	44.9872	1.24689	0.435163	2.86533	0.00416579	0.0122808	GABRA3	protein_coding
ENSG00000012048.23	380.981	1.084	0.0824721	13.1438	1.84713e-39	6.44369e-37	BRCA1	protein_coding
ENSG00000016082.15	0.901628	1.45956	0.466583	3.12819	0.00175884	0.00584351	ISL1	protein_coding
ENSG00000016402.13	59.6896	2.04279	0.354684	5.75946	8.43853e-09	1.12349e-07	IL20RA	protein_coding
ENSG00000016490.16	1.23596	3.20943	1.03368	3.10486	0.00190366	0.0062632	CLCA1	protein_coding
ENSG00000019186.10	3.06568	1.94657	0.401527	4.84792	1.24766e-06	9.93556e-06	CYP24A1	protein_coding
ENSG00000021300.14	273.986	2.31618	0.236758	9.7829	1.33338e-22	1.68064e-20	PLEKHB1	protein_coding
ENSG00000022556.16	60.4179	1.89382	0.232106	8.15928	3.37036e-16	1.91445e-14	NLRP2	protein_coding
ENSG00000024526.17	226.673	1.78774	0.121149	14.7566	2.78954e-49	2.60377e-46	DEPDC1	protein_coding
ENSG00000029559.7	16.1096	1.19946	0.312177	3.84225	0.00012191	0.000570808	IBSP	protein_coding
ENSG00000035499.13	259.701	1.93482	0.137618	14.0594	6.74518e-45	3.75728e-42	DEPDC1B	protein_coding
ENSG00000040731.10	6.05983	2.80879	0.486115	5.77805	7.55719e-09	1.02211e-07	CDH10	protein_coding
ENSG00000041353.10	158.445	1.21073	0.195864	6.18146	6.35118e-10	1.09453e-08	RAB27B	protein_coding
ENSG00000043039.7	6.77519	1.2457	0.262643	4.74292	2.10659e-06	1.58608e-05	BARX2	protein_coding
ENSG00000046604.13	1702.78	1.31152	0.144574	9.07161	1.17268e-19	1.06298e-17	DSG2	protein_coding
ENSG00000049089.15	189.175	1.4441	0.173498	8.32343	8.54506e-17	5.33657e-15	COL9A2	protein_coding
ENSG00000049283.18	18.6462	1.70247	0.208304	8.17299	3.00835e-16	1.72299e-14	EPN3	protein_coding
ENSG00000051180.17	160.125	1.23818	0.103763	11.9327	7.99287e-33	1.98591e-30	RAD51	protein_coding
ENSG00000051341.14	137.151	1.73059	0.106959	16.1799	6.99352e-59	1.42075e-55	POLQ	protein_coding
ENSG00000053328.8	21.0911	1.10687	0.199164	5.55755	2.73591e-08	3.23586e-07	METTL24	protein_coding
ENSG00000053524.12	54.6679	1.26901	0.211972	5.98666	2.14197e-09	3.27904e-08	MCF2L2	protein_coding
ENSG00000055118.16	78.7485	1.01604	0.26754	3.79769	0.00014605	0.000667548	KCNH2	protein_coding
ENSG00000055732.13	105.601	2.05866	0.279762	7.35862	1.85824e-13	6.36036e-12	MCOLN3	protein_coding
ENSG00000056487.16	1.37028	1.12068	0.348504	3.21568	0.00130137	0.00452063	PHF21B	protein_coding
ENSG00000057149.16	2.30976	1.62667	0.606098	2.68384	0.00727821	0.0197315	SERPINB3	protein_coding
ENSG00000058085.15	247.745	1.80037	0.243694	7.38782	1.49258e-13	5.19634e-12	LAMC2	protein_coding
ENSG00000060140.9	6.47585	1.29479	0.214973	6.02302	1.71188e-09	2.68978e-08	STYK1	protein_coding
ENSG00000060718.22	73.8949	1.32759	0.284738	4.66248	3.12427e-06	2.24324e-05	COL11A1	protein_coding
ENSG00000063015.20	154.568	1.8834	0.311855	6.03933	1.54755e-09	2.45279e-08	SEZ6	protein_coding
ENSG00000064270.13	13.4225	1.32604	0.243822	5.43857	5.37087e-08	5.95851e-07	ATP2C2	protein_coding
ENSG00000065328.17	184.635	1.66283	0.119285	13.94	3.62027e-44	1.86612e-41	MCM10	protein_coding
ENSG00000065609.14	2.61128	1.88098	0.388354	4.84345	1.27601e-06	1.01362e-05	SNAP91	protein_coding
ENSG00000066279.18	950.844	1.49031	0.114104	13.061	5.50356e-39	1.88189e-36	ASPM	protein_coding
ENSG00000066405.13	12.6614	2.19339	0.247611	8.85821	8.13068e-19	6.69506e-17	CLDN18	protein_coding
ENSG00000067225.18	8702.39	1.03893	0.150217	6.91618	4.6399e-12	1.21766e-10	PKM	protein_coding
ENSG00000068489.13	415.846	1.28251	0.116004	11.0557	2.05744e-28	3.88283e-26	PRR11	protein_coding
ENSG00000068985.5	42.9726	1.71403	0.48734	3.5171	0.000436281	0.00174897	PAGE1	protein_coding
ENSG00000069011.16	257.983	1.30602	0.276094	4.73035	2.24128e-06	1.6716e-05	PITX1	protein_coding
ENSG00000069018.19	1.5035	1.68655	0.306595	5.50092	3.7781e-08	4.33202e-07	TRPC7	protein_coding
ENSG00000070985.13	3.45849	1.06774	0.254282	4.19903	2.68057e-05	0.000150375	TRPM5	protein_coding
ENSG00000071539.14	268.802	1.59077	0.116432	13.6627	1.69613e-42	7.47485e-40	TRIP13	protein_coding
ENSG00000072041.17	8.54262	3.57033	0.527219	6.772	1.27014e-11	3.08477e-10	SLC6A15	protein_coding
ENSG00000072195.15	54.698	1.13243	0.211426	5.35614	8.50177e-08	8.95447e-07	SPEG	protein_coding
ENSG00000072571.20	387.601	1.26267	0.108019	11.6894	1.44364e-31	3.32383e-29	HMMR	protein_coding
ENSG00000072657.9	110.162	1.22817	0.301013	4.08012	4.50132e-05	0.000237848	TRHDE	protein_coding
ENSG00000073067.14	19.9825	1.15653	0.20179	5.73134	9.96412e-09	1.30398e-07	CYP2W1	protein_coding
ENSG00000073111.14	644.844	1.73661	0.122624	14.1621	1.5712e-45	9.19711e-43	MCM2	protein_coding
ENSG00000075213.11	62.1734	1.20585	0.200364	6.01833	1.76231e-09	2.75773e-08	SEMA3A	protein_coding
ENSG00000075218.19	251.38	1.81942	0.113726	15.9983	1.31384e-57	2.52081e-54	GTSE1	protein_coding
ENSG00000075388.4	2.02808	1.58973	0.598374	2.65675	0.00788972	0.0211098	FGF4	protein_coding
ENSG00000075673.12	3.75475	2.00596	0.468877	4.27823	1.88388e-05	0.000110706	ATP12A	protein_coding
ENSG00000075702.18	336.745	1.22107	0.108813	11.2217	3.19183e-29	6.19287e-27	WDR62	protein_coding
ENSG00000076382.17	1179.06	1.0007	0.0972501	10.2899	7.82316e-25	1.14e-22	SPAG5	protein_coding
ENSG00000077274.9	111.239	1.84665	0.326047	5.66374	1.48107e-08	1.86884e-07	CAPN6	protein_coding
ENSG00000077327.16	3.54435	1.07217	0.232975	4.60209	4.18282e-06	2.91422e-05	SPAG6	protein_coding
ENSG00000077935.17	55.0673	1.77578	0.216445	8.20432	2.31908e-16	1.35519e-14	SMC1B	protein_coding
ENSG00000078114.19	337.89	1.08396	0.225361	4.80989	1.51014e-06	1.17824e-05	NEBL	protein_coding
ENSG00000078328.22	1.77378	1.14079	0.25113	4.54265	5.55522e-06	3.7545e-05	RBFOX1	protein_coding
ENSG00000078900.15	145.378	1.13579	0.157508	7.21096	5.55585e-13	1.76034e-11	TP73	protein_coding
ENSG00000079112.10	34.2357	2.50781	0.293868	8.5338	1.41621e-17	9.7625e-16	CDH17	protein_coding
ENSG00000080224.17	7.23369	2.95688	0.386523	7.64993	2.01082e-14	8.18502e-13	EPHA6	protein_coding
ENSG00000080293.10	125.687	1.11443	0.211426	5.27101	1.35672e-07	1.3601e-06	SCTR	protein_coding
ENSG00000080839.12	268.623	1.10342	0.0775376	14.2307	5.90655e-46	3.70889e-43	RBL1	protein_coding
ENSG00000080986.13	378.27	1.33236	0.104474	12.753	3.0001e-37	9.41923e-35	NDC80	protein_coding
ENSG00000082482.14	17.003	1.84516	0.402867	4.58008	4.6479e-06	3.20207e-05	KCNK2	protein_coding
ENSG00000083307.12	40.6488	2.13304	0.29066	7.3386	2.15832e-13	7.30066e-12	GRHL2	protein_coding
ENSG00000083782.8	0.594828	1.08167	0.309174	3.49857	0.000467754	0.00186003	EPYC	protein_coding
ENSG00000084731.15	194.483	1.02196	0.139426	7.32979	2.30512e-13	7.78197e-12	KIF3C	protein_coding
ENSG00000085840.13	190.803	1.38757	0.109558	12.6652	9.22423e-37	2.79446e-34	ORC1	protein_coding
ENSG00000085999.13	79.8406	1.95272	0.123295	15.8378	1.70714e-56	2.80752e-53	RAD54L	protein_coding
ENSG00000086548.9	28.5155	1.55901	0.384783	4.05165	5.08583e-05	0.000265043	CEACAM6	protein_coding
ENSG00000087494.16	74.4682	1.42923	0.23599	6.05632	1.39273e-09	2.23407e-08	PTHLH	protein_coding
ENSG00000088305.18	141.073	1.06951	0.102003	10.485	1.01196e-25	1.5886e-23	DNMT3B	protein_coding
ENSG00000088325.16	1416.43	1.58024	0.0994136	15.8956	6.79251e-57	1.23466e-53	TPX2	protein_coding
ENSG00000089356.18	4.09562	1.62841	0.275188	5.91743	3.27005e-09	4.77928e-08	FXYD3	protein_coding
ENSG00000089685.15	1191.58	1.09887	0.136507	8.04992	8.28462e-16	4.40859e-14	BIRC5	protein_coding
ENSG00000090402.8	7.34824	2.91418	0.486012	5.9961	2.02115e-09	3.11201e-08	SI	protein_coding
ENSG00000090889.12	533.12	1.64562	0.11602	14.1839	1.15298e-45	6.98584e-43	KIF4A	protein_coding
ENSG00000090932.11	3.15234	1.15991	0.301469	3.84752	0.000119319	0.000560274	DLL3	protein_coding
ENSG00000091651.9	156.46	1.43141	0.110352	12.9713	1.78073e-38	5.85707e-36	ORC6	protein_coding
ENSG00000091704.10	5.55086	1.18945	0.342023	3.47769	0.000505747	0.00199321	CPA1	protein_coding
ENSG00000092421.17	751.367	1.30554	0.1682	7.76186	8.36939e-15	3.66344e-13	SEMA6A	protein_coding
ENSG00000092470.12	314.819	1.36835	0.100318	13.6402	2.30802e-42	9.96373e-40	WDR76	protein_coding
ENSG00000092853.14	160.262	1.70698	0.111727	15.2782	1.06905e-52	1.19099e-49	CLSPN	protein_coding
ENSG00000093009.11	290.347	1.26512	0.11041	11.4584	2.13356e-30	4.54844e-28	CDC45	protein_coding
ENSG00000094804.12	643.598	1.52696	0.108982	14.0112	1.33196e-44	7.18758e-42	CDC6	protein_coding
ENSG00000095627.9	6.00591	2.30091	0.318816	7.21704	5.31299e-13	1.68804e-11	TDRD1	protein_coding
ENSG00000095752.7	9.25709	1.59762	0.202969	7.87126	3.51101e-15	1.66332e-13	IL11	protein_coding
ENSG00000095777.17	6.77414	2.91067	0.462279	6.29635	3.04742e-10	5.58332e-09	MYO3A	protein_coding
ENSG00000096433.11	544.837	1.72231	0.184983	9.31062	1.27091e-20	1.31413e-18	ITPR3	protein_coding
ENSG00000097046.13	207.373	1.16956	0.0965596	12.1123	9.08621e-34	2.43257e-31	CDC7	protein_coding
ENSG00000099399.6	148.839	2.02332	0.550405	3.67606	0.000236866	0.00102128	MAGEB2	protein_coding
ENSG00000099812.9	340.434	1.85002	0.321497	5.75438	8.69578e-09	1.15374e-07	MISP	protein_coding
ENSG00000100095.19	6.65877	1.092	0.239207	4.56505	4.99365e-06	3.41236e-05	SEZ6L	protein_coding
ENSG00000100162.15	340.544	1.06075	0.134919	7.86214	3.7764e-15	1.77204e-13	CENPM	protein_coding
ENSG00000100206.10	22.4807	1.40527	0.173616	8.09417	5.76546e-16	3.12584e-14	DMC1	protein_coding
ENSG00000100373.10	469.469	1.34991	0.326762	4.13116	3.60932e-05	0.000196104	UPK3A	protein_coding
ENSG00000100433.16	7.51354	1.14499	0.271329	4.21993	2.44382e-05	0.000139021	KCNK10	protein_coding
ENSG00000100526.20	428.503	1.27863	0.115787	11.043	2.37099e-28	4.40239e-26	CDKN3	protein_coding
ENSG00000100604.13	34.9899	2.85729	0.285953	9.99215	1.64966e-23	2.20824e-21	CHGA	protein_coding
ENSG00000100884.9	13.2641	1.29074	0.24262	5.32001	1.03764e-07	1.07165e-06	CPNE6	protein_coding
ENSG00000101003.10	424.225	1.55853	0.104873	14.8611	5.89557e-50	5.65582e-47	GINS1	protein_coding
ENSG00000101057.16	1114.37	1.51448	0.160829	9.41672	4.65406e-21	5.08648e-19	MYBL2	protein_coding
ENSG00000101115.13	184.268	1.39326	0.237368	5.86962	4.36795e-09	6.19513e-08	SALL4	protein_coding
ENSG00000101144.13	24.7857	1.19855	0.346896	3.45506	0.000550162	0.00214537	BMP7	protein_coding
ENSG00000101327.9	0.580171	1.08014	0.404529	2.67012	0.00758231	0.0204245	PDYN	protein_coding
ENSG00000101349.17	3.09785	1.42776	0.410683	3.47654	0.000507933	0.00200091	PAK5	protein_coding
ENSG00000101412.13	1023.98	1.19262	0.130208	9.1593	5.22373e-20	4.91571e-18	E2F1	protein_coding
ENSG00000101489.20	13.9229	1.11738	0.205831	5.42861	5.67932e-08	6.2525e-07	CELF4	protein_coding
ENSG00000101842.14	88.0802	1.32169	0.259314	5.09686	3.45338e-07	3.14935e-06	VSIG1	protein_coding
ENSG00000102007.11	944.334	1.06424	0.133395	7.97809	1.48617e-15	7.50385e-14	PLP2	protein_coding
ENSG00000102021.11	2.92088	2.46896	0.604216	4.08621	4.38472e-05	0.000232791	LUZP4	protein_coding
ENSG00000102174.9	43.2469	1.21854	0.222495	5.47669	4.33352e-08	4.91019e-07	PHEX	protein_coding
ENSG00000102230.14	7.89284	1.2852	0.222171	5.78475	7.26198e-09	9.85074e-08	PCYT1B	protein_coding
ENSG00000102384.13	102.065	1.53671	0.104932	14.6448	1.45414e-48	1.22488e-45	CENPI	protein_coding
ENSG00000102385.12	5.6405	1.32527	0.210075	6.30857	2.81633e-10	5.19022e-09	DRP2	protein_coding
ENSG00000102554.14	477.579	1.1349	0.186182	6.09567	1.08981e-09	1.78546e-08	KLF5	protein_coding
ENSG00000102683.8	1.05926	1.19782	0.28329	4.22826	2.35509e-05	0.000134706	SGCG	protein_coding
ENSG00000102837.7	18.5408	1.59714	0.377626	4.22942	2.34297e-05	0.000134101	OLFM4	protein_coding
ENSG00000103089.9	60.4124	1.98024	0.291894	6.7841	1.16811e-11	2.85303e-10	FA2H	protein_coding
ENSG00000103742.12	59.5812	1.04938	0.222956	4.70665	2.51817e-06	1.8567e-05	IGDCC4	protein_coding
ENSG00000104044.16	70.2263	1.94309	0.276075	7.03829	1.94619e-12	5.58252e-11	OCA2	protein_coding
ENSG00000104112.9	8.38518	1.32331	0.257071	5.14763	2.63792e-07	2.47833e-06	SCG3	protein_coding
ENSG00000104140.7	41.3646	1.81365	0.255986	7.08496	1.39083e-12	4.10544e-11	RHOV	protein_coding
ENSG00000104147.9	31.3102	1.34359	0.0932845	14.4031	4.94474e-47	3.41543e-44	OIP5	protein_coding
ENSG00000104177.18	121.825	1.28635	0.214806	5.9884	2.11919e-09	3.25138e-08	MYEF2	protein_coding
ENSG00000104313.20	11.0783	2.63857	0.268593	9.82367	8.9043e-23	1.13896e-20	EYA1	protein_coding
ENSG00000104413.18	350.338	1.89161	0.373343	5.06668	4.04806e-07	3.64073e-06	ESRP1	protein_coding
ENSG00000104722.14	2.21101	1.70712	0.360646	4.7335	2.2068e-06	1.6493e-05	NEFM	protein_coding
ENSG00000104889.7	1.91538	1.18523	0.186243	6.36391	1.96683e-10	3.76533e-09	RNASEH2A	protein_coding
ENSG00000104892.17	28.3242	1.62181	0.256098	6.33278	2.40778e-10	4.52227e-09	KLC3	protein_coding
ENSG00000104899.8	27.9001	1.15268	0.217089	5.30973	1.09789e-07	1.12713e-06	AMH	protein_coding
ENSG00000105011.9	447.867	1.36738	0.115005	11.8897	1.33906e-32	3.27983e-30	ASF1B	protein_coding
ENSG00000105048.17	51.8787	1.31596	0.273992	4.80292	1.56368e-06	1.2152e-05	TNNT1	protein_coding
ENSG00000105173.14	289.615	1.51274	0.165323	9.15019	5.68349e-20	5.33383e-18	CCNE1	protein_coding
ENSG00000105281.12	1141.5	1.01813	0.153306	6.64119	3.11168e-11	7.00553e-10	SLC1A5	protein_coding
ENSG00000105290.13	180.517	1.37108	0.211439	6.4845	8.90237e-11	1.82681e-09	APLP1	protein_coding
ENSG00000105388.16	9.99921	1.88666	0.409522	4.60697	4.08569e-06	2.85403e-05	CEACAM5	protein_coding
ENSG00000105675.9	4.79741	1.61183	0.360233	4.4744	7.66245e-06	5.00226e-05	ATP4A	protein_coding
ENSG00000105750.15	65.6193	1.08112	0.128194	8.43344	3.35655e-17	2.21225e-15	ZNF85	protein_coding
ENSG00000105855.10	140.161	1.54662	0.26442	5.8491	4.94233e-09	6.91751e-08	ITGB8	protein_coding
ENSG00000105880.7	15.2268	1.36257	0.277212	4.91525	8.86672e-07	7.32061e-06	DLX5	protein_coding
ENSG00000105889.16	13.2194	1.18956	0.199506	5.96255	2.48331e-09	3.74351e-08	STEAP1B	protein_coding
ENSG00000105929.16	1.9874	1.25572	0.290442	4.3235	1.53575e-05	9.25469e-05	ATP6V0A4	protein_coding
ENSG00000105963.15	159.373	1.11591	0.190973	5.8433	5.11761e-09	7.1382e-08	ADAP1	protein_coding
ENSG00000106006.6	2.26259	1.41193	0.330631	4.27042	1.95105e-05	0.000114148	HOXA6	protein_coding
ENSG00000106013.15	2.88821	1.06109	0.313433	3.38536	0.000710845	0.00267922	ANKRD7	protein_coding
ENSG00000106123.12	331.426	1.19549	0.187031	6.39194	1.63799e-10	3.18522e-09	EPHB6	protein_coding
ENSG00000106302.10	2.1676	1.49774	0.302295	4.95458	7.24876e-07	6.11787e-06	HYAL4	protein_coding
ENSG00000106462.11	585.558	1.0614	0.0840004	12.6356	1.34299e-36	4.03318e-34	EZH2	protein_coding
ENSG00000106541.12	442.712	2.53385	0.362831	6.98356	2.87802e-12	7.88853e-11	AGR2	protein_coding
ENSG00000107014.9	1.34474	1.02634	0.258378	3.97224	7.12009e-05	0.000356118	RLN2	protein_coding
ENSG00000107159.13	591.294	3.36958	0.309114	10.9008	1.14302e-27	1.98368e-25	CA9	protein_coding
ENSG00000107984.10	782.94	1.6422	0.324585	5.0594	4.20567e-07	3.75834e-06	DKK1	protein_coding
ENSG00000108018.15	19.7377	1.81257	0.37745	4.80214	1.56976e-06	1.21937e-05	SORCS1	protein_coding
ENSG00000108852.15	35.7991	2.01787	0.169423	11.9103	1.04621e-32	2.58086e-30	MPP2	protein_coding
ENSG00000109101.8	1.95271	1.54737	0.335235	4.61576	3.91654e-06	2.7509e-05	FOXN1	protein_coding
ENSG00000109255.11	2.26628	1.24832	0.247476	5.04422	4.55385e-07	4.04298e-06	NMU	protein_coding
ENSG00000109424.4	0.662102	1.18449	0.378166	3.1322	0.00173502	0.00577825	UCP1	protein_coding
ENSG00000109674.4	91.8513	1.37624	0.14468	9.51228	1.86529e-21	2.11907e-19	NEIL3	protein_coding
ENSG00000109705.8	9.15348	1.24743	0.285875	4.36355	1.27971e-05	7.8585e-05	NKX3-2	protein_coding
ENSG00000109738.11	125.642	1.12307	0.251503	4.46542	7.99116e-06	5.19057e-05	GLRB	protein_coding
ENSG00000109805.10	372.712	1.72412	0.112132	15.3758	2.37888e-53	2.83899e-50	NCAPG	protein_coding
ENSG00000110148.10	1.38905	2.05066	0.417409	4.91282	8.97738e-07	7.39782e-06	CCKBR	protein_coding
ENSG00000110195.14	62.134	1.2558	0.268024	4.6854	2.79413e-06	2.03539e-05	FOLR1	protein_coding
ENSG00000110427.17	22.4667	1.63514	0.232638	7.0287	2.08469e-12	5.92123e-11	KIAA1549L	protein_coding
ENSG00000110660.15	94.9328	1.15718	0.167079	6.92596	4.33036e-12	1.14425e-10	SLC35F2	protein_coding
ENSG00000111206.13	668.056	1.82283	0.112285	16.2339	2.90396e-59	6.2682e-56	FOXM1	protein_coding
ENSG00000111247.15	191.509	1.4658	0.0994148	14.7443	3.34756e-49	3.04241e-46	RAD51AP1	protein_coding
ENSG00000111452.13	701.214	1.12658	0.205617	5.47903	4.27673e-08	4.8554e-07	ADGRD1	protein_coding
ENSG00000111665.12	354.125	1.24597	0.116702	10.6765	1.31147e-26	2.16712e-24	CDCA3	protein_coding
ENSG00000111783.13	2.06805	1.60228	0.342211	4.68215	2.83886e-06	2.06319e-05	RFX4	protein_coding
ENSG00000112029.10	173.895	1.05953	0.0868812	12.1952	3.29765e-34	9.11102e-32	FBXO5	protein_coding
ENSG00000112041.13	1.07313	1.15667	0.262014	4.41452	1.01234e-05	6.3916e-05	TULP1	protein_coding
ENSG00000112116.10	0.705078	1.20449	0.385032	3.12829	0.00175829	0.00584224	IL17F	protein_coding
ENSG00000112238.12	0.414197	1.15726	0.50374	2.29734	0.0215996	0.0492776	PRDM13	protein_coding
ENSG00000112273.7	4.71892	2.01334	0.552946	3.64112	0.000271453	0.00115256	HDGFL1	protein_coding
ENSG00000112319.19	22.4199	1.32201	0.358842	3.6841	0.000229517	0.000992808	EYA4	protein_coding
ENSG00000112742.10	252.094	1.67949	0.120274	13.9638	2.59093e-44	1.35576e-41	TTK	protein_coding
ENSG00000112796.10	155.555	1.02284	0.253684	4.03195	5.53151e-05	0.000285205	ENPP5	protein_coding
ENSG00000112812.16	73.3323	1.27416	0.341076	3.73569	0.000187199	0.000829925	PRSS16	protein_coding
ENSG00000112818.10	416.81	1.92897	0.321728	5.99564	2.0268e-09	3.11933e-08	MEP1A	protein_coding
ENSG00000112837.17	39.2339	1.28563	0.240746	5.34019	9.28496e-08	9.6907e-07	TBX18	protein_coding
ENSG00000112984.12	494.334	1.61166	0.11329	14.2259	6.32529e-46	3.9009e-43	KIF20A	protein_coding
ENSG00000113100.10	20.1616	2.01807	0.544205	3.70829	0.000208661	0.000912656	CDH9	protein_coding
ENSG00000113211.5	25.1979	1.15546	0.187961	6.14733	7.87987e-10	1.32676e-08	PCDHB6	protein_coding
ENSG00000113249.13	55.983	2.91973	0.29397	9.93208	3.01883e-23	3.99458e-21	HAVCR1	protein_coding
ENSG00000113361.13	448.413	1.11325	0.172433	6.45615	1.07398e-10	2.16654e-09	CDH6	protein_coding
ENSG00000113368.12	1125.69	1.32617	0.0907273	14.6171	2.18497e-48	1.67689e-45	LMNB1	protein_coding
ENSG00000113810.16	779.011	1.40551	0.108825	12.9154	3.68691e-38	1.19001e-35	SMC4	protein_coding
ENSG00000114113.6	22.2935	1.48583	0.288065	5.15797	2.49646e-07	2.35632e-06	RBP2	protein_coding
ENSG00000114346.14	624.847	1.6193	0.0937912	17.2649	8.64519e-67	7.46426e-63	ECT2	protein_coding
ENSG00000114529.13	40.5551	1.78651	0.230287	7.75774	8.64539e-15	3.75097e-13	C3orf52	protein_coding
ENSG00000115163.15	154.383	1.58909	0.126423	12.5697	3.10065e-36	9.1525e-34	CENPA	protein_coding
ENSG00000115221.12	38.1508	1.40839	0.258521	5.44786	5.09792e-08	5.67758e-07	ITGB6	protein_coding
ENSG00000115297.11	5.79032	1.14512	0.322521	3.55052	0.000384467	0.00156728	TLX2	protein_coding
ENSG00000115507.10	64.8105	1.20417	0.177738	6.77495	1.24447e-11	3.02668e-10	OTX1	protein_coding
ENSG00000115616.3	9.97436	1.5089	0.227667	6.62766	3.41054e-11	7.61879e-10	SLC9A2	protein_coding
ENSG00000115844.11	4.92505	1.28222	0.323355	3.96537	7.3281e-05	0.000365147	DLX2	protein_coding
ENSG00000116218.13	0.459282	1.37486	0.540595	2.54323	0.0109833	0.0279179	NPHS2	protein_coding
ENSG00000117069.15	18.9478	1.28654	0.251123	5.12315	3.00471e-07	2.78953e-06	ST6GALNAC5	protein_coding
ENSG00000117122.14	91.2976	1.3237	0.209903	6.30623	2.85919e-10	5.25799e-09	MFAP2	protein_coding
ENSG00000117148.8	34.4508	1.01746	0.401457	2.53443	0.0112631	0.0285471	ACTL8	protein_coding
ENSG00000117399.14	927.013	1.47426	0.139386	10.5769	3.81531e-26	6.18618e-24	CDC20	protein_coding
ENSG00000117586.11	182.502	1.14577	0.130546	8.77671	1.68321e-18	1.32418e-16	TNFSF4	protein_coding
ENSG00000117598.13	0.742967	1.83541	0.636919	2.8817	0.00395534	0.0117486	PLPPR5	protein_coding
ENSG00000117650.13	390.58	1.53907	0.1151	13.3716	8.86379e-41	3.36395e-38	NEK2	protein_coding
ENSG00000117724.13	1148.84	1.6985	0.109684	15.4854	4.35599e-54	5.5718e-51	CENPF	protein_coding
ENSG00000118017.4	10.9678	2.46338	0.351101	7.01615	2.28062e-12	6.39832e-11	A4GNT	protein_coding
ENSG00000118193.12	219.275	1.52566	0.109543	13.9275	4.31465e-44	2.12873e-41	KIF14	protein_coding
ENSG00000118194.20	6.70504	1.21353	0.276499	4.38891	1.13919e-05	7.08245e-05	TNNT2	protein_coding
ENSG00000118402.6	23.4345	1.59282	0.192555	8.272	1.31734e-16	7.99573e-15	ELOVL4	protein_coding
ENSG00000118432.12	52.8862	1.37299	0.248778	5.51894	3.41047e-08	3.95116e-07	CNR1	protein_coding
ENSG00000118492.17	0.823081	1.28011	0.348946	3.6685	0.00024398	0.0010492	ADGB	protein_coding
ENSG00000118513.19	29.821	1.12425	0.153871	7.30647	2.74253e-13	9.12486e-12	MYB	protein_coding
ENSG00000119411.11	176.198	1.04823	0.195513	5.36142	8.25724e-08	8.72887e-07	BSPRY	protein_coding
ENSG00000119535.18	294.913	1.06943	0.154088	6.94037	3.91084e-12	1.04459e-10	CSF3R	protein_coding
ENSG00000119866.22	69.6035	1.09034	0.195412	5.57967	2.40976e-08	2.88971e-07	BCL11A	protein_coding
ENSG00000119888.11	2265.13	1.03535	0.305235	3.39197	0.000693915	0.00262228	EPCAM	protein_coding
ENSG00000119915.5	14.2456	1.36081	0.227114	5.99174	2.07612e-09	3.19096e-08	ELOVL3	protein_coding
ENSG00000119969.15	354.534	1.49296	0.103147	14.4741	1.76687e-47	1.27126e-44	HELLS	protein_coding
ENSG00000120057.5	211.668	1.29241	0.38266	3.37743	0.000731672	0.00274633	SFRP5	protein_coding
ENSG00000120210.8	7.24361	2.20651	0.271169	8.13701	4.05172e-16	2.26058e-14	INSL6	protein_coding
ENSG00000120211.4	0.690947	1.40206	0.584342	2.39938	0.0164227	0.0391398	INSL4	protein_coding
ENSG00000120251.21	5.11314	2.0116	0.364956	5.51189	3.54995e-08	4.09901e-07	GRIA2	protein_coding
ENSG00000120322.4	25.1448	1.19681	0.244882	4.8873	1.0223e-06	8.32498e-06	PCDHB8	protein_coding
ENSG00000120334.15	213.056	1.10993	0.0812412	13.6621	1.70985e-42	7.47485e-40	CENPL	protein_coding
ENSG00000120498.14	56.3137	1.08353	0.295555	3.66608	0.000246298	0.00105745	TEX11	protein_coding
ENSG00000120669.16	16.3108	1.46188	0.516598	2.82982	0.00465742	0.0135235	SOHLH2	protein_coding
ENSG00000120875.9	277.619	1.00739	0.169453	5.94494	2.76561e-09	4.11695e-08	DUSP4	protein_coding
ENSG00000121152.10	311.561	1.52433	0.103416	14.7397	3.58395e-49	3.17373e-46	NCAPH	protein_coding
ENSG00000121388.6	15.9972	3.08131	0.575244	5.35652	8.48419e-08	8.93869e-07	AL139327.1	transcribed_unprocessed_pseudogene
ENSG00000121621.7	128.22	1.82071	0.110643	16.4557	7.63533e-61	2.02841e-57	KIF18A	protein_coding
ENSG00000121753.12	36.79	1.44947	0.178123	8.13748	4.03579e-16	2.25889e-14	ADGRB2	protein_coding
ENSG00000121905.10	2.61509	1.13549	0.212521	5.34295	9.14462e-08	9.55867e-07	HPCA	protein_coding
ENSG00000121957.15	188.133	1.29856	0.0844556	15.3757	2.38391e-53	2.83899e-50	GPSM2	protein_coding
ENSG00000122420.10	376.855	1.1613	0.248524	4.67279	2.97142e-06	2.14958e-05	PTGFR	protein_coding
ENSG00000122711.9	4.84355	1.53408	0.378663	4.0513	5.09337e-05	0.000265316	SPINK4	protein_coding
ENSG00000122870.12	1020.04	1.084	0.204047	5.31249	1.08138e-07	1.11227e-06	BICC1	protein_coding
ENSG00000122952.17	818.975	1.21477	0.0978588	12.4135	2.2068e-35	6.35118e-33	ZWINT	protein_coding
ENSG00000122966.17	364.699	1.01453	0.0930414	10.9041	1.10202e-27	1.92219e-25	CIT	protein_coding
ENSG00000123201.14	28.3705	1.09218	0.269263	4.05617	4.9883e-05	0.000260553	GUCY1B2	transcribed_unitary_pseudogene
ENSG00000123219.13	128.716	1.50119	0.102353	14.6669	1.05112e-48	9.07541e-46	CENPK	protein_coding
ENSG00000123243.15	640.596	1.80997	0.22905	7.90208	2.74297e-15	1.32491e-13	ITIH5	protein_coding
ENSG00000123364.5	2.89294	1.25836	0.395738	3.17978	0.00147389	0.00503983	HOXC13	protein_coding
ENSG00000123473.16	215.653	1.42375	0.0874349	16.2836	1.29092e-59	2.97221e-56	STIL	protein_coding
ENSG00000123485.12	388.827	1.58112	0.112607	14.041	8.74271e-45	4.79267e-42	HJURP	protein_coding
ENSG00000123610.5	31.197	1.92203	0.223328	8.60631	7.54515e-18	5.44007e-16	TNFAIP6	protein_coding
ENSG00000124143.10	17.3204	1.30497	0.328105	3.9773	6.97031e-05	0.000349386	ARHGAP40	protein_coding
ENSG00000124232.11	1.94047	1.70034	0.303763	5.5976	2.17344e-08	2.63283e-07	RBPJL	protein_coding
ENSG00000124260.12	6.24533	2.52869	0.532639	4.74748	2.0597e-06	1.55458e-05	MAGEA10	protein_coding
ENSG00000124429.18	188.75	1.35026	0.27391	4.92958	8.24082e-07	6.86126e-06	POF1B	protein_coding
ENSG00000124469.12	0.499779	1.08117	0.354484	3.05	0.00228842	0.00733757	CEACAM8	protein_coding
ENSG00000124479.11	1.47011	1.32088	0.318913	4.14181	3.4458e-05	0.00018838	NDP	protein_coding
ENSG00000124507.11	126.319	1.26958	0.209919	6.04794	1.46712e-09	2.34143e-08	PACSIN1	protein_coding
ENSG00000124613.8	49.8221	1.07792	0.190351	5.6628	1.48923e-08	1.87777e-07	ZNF391	protein_coding
ENSG00000124664.11	30.8664	1.62987	0.259922	6.27062	3.59611e-10	6.51261e-09	SPDEF	protein_coding
ENSG00000124882.4	32.006	1.64633	0.311909	5.27825	1.3042e-07	1.31241e-06	EREG	protein_coding
ENSG00000124939.6	14.5725	1.10238	0.287721	3.83142	0.000127405	0.00059308	SCGB2A1	protein_coding
ENSG00000125285.6	2.63314	1.42126	0.307679	4.61929	3.85058e-06	2.70567e-05	SOX21	protein_coding
ENSG00000125319.15	149.422	1.1601	0.0969782	11.9625	5.58373e-33	1.40759e-30	HROB	protein_coding
ENSG00000125414.19	2.09569	1.02113	0.414149	2.46561	0.0136779	0.0335808	MYH2	protein_coding
ENSG00000125571.9	1.18907	1.66816	0.241804	6.8988	5.24429e-12	1.35668e-10	IL37	protein_coding
ENSG00000125820.6	1.8009	1.29296	0.538248	2.40217	0.0162981	0.0389069	NKX2-2	protein_coding
ENSG00000125850.11	24.9186	1.87674	0.313589	5.98473	2.1675e-09	3.31518e-08	OVOL2	protein_coding
ENSG00000125869.10	36.2942	1.74322	0.230285	7.56985	3.73665e-14	1.45432e-12	LAMP5	protein_coding
ENSG00000126259.20	6.00588	2.23239	0.288502	7.73786	1.01105e-14	4.34299e-13	KIRREL2	protein_coding
ENSG00000126752.8	447.881	1.47443	0.422741	3.48779	0.000487024	0.00192955	SSX1	protein_coding
ENSG00000126787.13	292.364	1.65453	0.113177	14.619	2.12628e-48	1.66893e-45	DLGAP5	protein_coding
ENSG00000126890.13	258.569	1.20684	0.500168	2.41287	0.0158276	0.0379678	CTAG2	protein_coding
ENSG00000126950.8	5.00753	1.29171	0.218877	5.90154	3.60123e-09	5.20604e-08	TMEM35A	protein_coding
ENSG00000127325.19	3.69951	1.27911	0.363194	3.52184	0.000428564	0.00172224	BEST3	protein_coding
ENSG00000127412.7	1.56721	2.06759	0.351	5.89056	3.84893e-09	5.52709e-08	TRPV5	protein_coding
ENSG00000127423.11	41.3004	1.16406	0.106069	10.9745	5.06698e-28	8.974e-26	AUNIP	protein_coding
ENSG00000127561.15	30.9579	1.09265	0.200362	5.45338	4.94209e-08	5.52184e-07	SYNGR3	protein_coding
ENSG00000127564.17	242.329	1.27815	0.109619	11.66	2.04136e-31	4.6689e-29	PKMYT1	protein_coding
ENSG00000128242.13	850.066	1.18507	0.21968	5.39453	6.87014e-08	7.40303e-07	GAL3ST1	protein_coding
ENSG00000128408.9	62.0402	1.72588	0.163309	10.5681	4.18691e-26	6.72555e-24	RIBC2	protein_coding
ENSG00000128578.10	112.837	1.2457	0.151205	8.2385	1.74389e-16	1.0438e-14	STRIP2	protein_coding
ENSG00000128610.12	7.49514	1.10504	0.341126	3.23939	0.00119785	0.00421872	FEZF1	protein_coding
ENSG00000128645.15	4.65747	1.80391	0.30394	5.93509	2.93686e-09	4.34379e-08	HOXD1	protein_coding
ENSG00000128683.14	42.5549	1.13739	0.261703	4.34612	1.38565e-05	8.43553e-05	GAD1	protein_coding
ENSG00000128713.14	0.870176	1.91964	0.517127	3.71213	0.00020552	0.000900627	HOXD11	protein_coding
ENSG00000128714.6	2.56978	1.24349	0.496366	2.50519	0.0122385	0.0305832	HOXD13	protein_coding
ENSG00000129167.9	12.8888	1.27197	0.160668	7.91674	2.4381e-15	1.19098e-13	TPH1	protein_coding
ENSG00000129173.13	155.338	1.72149	0.124316	13.8477	1.31397e-43	6.19553e-41	E2F8	protein_coding
ENSG00000129195.16	82.6726	1.76522	0.169158	10.4353	1.70991e-25	2.59006e-23	PIMREG	protein_coding
ENSG00000129221.16	0.489447	1.20769	0.414385	2.91441	0.00356362	0.0107412	AIPL1	protein_coding
ENSG00000129521.15	489.129	1.07521	0.191326	5.61979	1.91192e-08	2.35066e-07	EGLN3	protein_coding
ENSG00000129654.8	136.831	3.00905	0.276386	10.8871	1.32787e-27	2.28156e-25	FOXJ1	protein_coding
ENSG00000129810.15	109.668	1.46218	0.110626	13.2173	6.97101e-40	2.48197e-37	SGO1	protein_coding
ENSG00000130475.14	142.348	1.10929	0.181572	6.10938	1.00018e-09	1.65195e-08	FCHO1	protein_coding
ENSG00000130477.15	48.3852	1.34173	0.233189	5.75383	8.72423e-09	1.15703e-07	UNC13A	protein_coding
ENSG00000130675.15	34.0548	1.46808	0.414938	3.53809	0.00040304	0.00163412	MNX1	protein_coding
ENSG00000130701.4	6.76479	2.1632	0.387321	5.58504	2.33641e-08	2.8115e-07	RBBP8NL	protein_coding
ENSG00000130720.13	24.3576	1.86215	0.288204	6.46123	1.03857e-10	2.10124e-09	FIBCD1	protein_coding
ENSG00000130768.15	51.2967	1.00891	0.20917	4.82341	1.41127e-06	1.10853e-05	SMPDL3B	protein_coding
ENSG00000130822.16	58.7935	1.85064	0.330871	5.59323	2.22886e-08	2.69433e-07	PNCK	protein_coding
ENSG00000130829.18	1340.4	1.20584	0.225437	5.34888	8.84996e-08	9.29004e-07	DUSP9	protein_coding
ENSG00000130876.11	72.601	3.0568	0.327476	9.33443	1.01533e-20	1.06581e-18	SLC7A10	protein_coding
ENSG00000131037.15	144.696	1.1839	0.212545	5.57012	2.54569e-08	3.03584e-07	EPS8L1	protein_coding
ENSG00000131142.13	234.045	1.00805	0.276993	3.63926	0.000273421	0.00115991	CCL25	protein_coding
ENSG00000131470.15	63.5143	1.12974	0.0866638	13.0359	7.64555e-39	2.58869e-36	PSMC3IP	protein_coding
ENSG00000131721.6	3.19242	2.12829	0.504298	4.2203	2.43976e-05	0.000138859	RHOXF2	protein_coding
ENSG00000131747.15	2096.9	1.89981	0.112688	16.8591	8.99546e-64	5.17778e-60	TOP2A	protein_coding
ENSG00000131771.14	57.0852	2.28831	0.289866	7.89437	2.91781e-15	1.39763e-13	PPP1R1B	protein_coding
ENSG00000132446.7	1.89805	2.78027	0.735222	3.78154	0.000155861	0.000705387	FTHL17	protein_coding
ENSG00000132563.16	60.4599	1.01706	0.19202	5.29662	1.17967e-07	1.19999e-06	REEP2	protein_coding
ENSG00000132639.13	216.088	1.20379	0.216638	5.55669	2.74942e-08	3.24962e-07	SNAP25	protein_coding
ENSG00000132698.15	84.1882	2.82012	0.318385	8.85757	8.17803e-19	6.7087e-17	RAB25	protein_coding
ENSG00000132746.15	10.273	2.67607	0.368195	7.26808	3.64634e-13	1.19365e-11	ALDH3B2	protein_coding
ENSG00000132972.19	27.2199	2.49933	0.454462	5.49953	3.80799e-08	4.36195e-07	RNF17	protein_coding
ENSG00000133169.6	125.648	1.05305	0.351745	2.99379	0.00275532	0.00859989	BEX1	protein_coding
ENSG00000133519.12	14.4861	2.00408	0.27277	7.34714	2.025e-13	6.8834e-12	ZDHHC8P1	transcribed_unprocessed_pseudogene
ENSG00000133636.11	1093.81	1.88136	0.394431	4.76981	1.84398e-06	1.40807e-05	NTS	protein_coding
ENSG00000133640.20	4.41069	1.89522	0.350242	5.41119	6.26076e-08	6.80798e-07	LRRIQ1	protein_coding
ENSG00000133863.9	16.7962	4.46984	0.421748	10.5984	3.03266e-26	4.94037e-24	TEX15	protein_coding
ENSG00000134028.14	75.0641	1.01155	0.221949	4.5576	5.17405e-06	3.51615e-05	ADAMDEC1	protein_coding
ENSG00000134057.15	1055.01	1.30936	0.107475	12.1829	3.83397e-34	1.05087e-31	CCNB1	protein_coding
ENSG00000134193.15	14.7246	1.09808	0.18402	5.96719	2.41374e-09	3.65297e-08	REG4	protein_coding
ENSG00000134258.17	81.1891	1.46649	0.307037	4.77628	1.78565e-06	1.36769e-05	VTCN1	protein_coding
ENSG00000134398.15	4.87493	1.38185	0.335573	4.11787	3.82387e-05	0.000206475	ERN2	protein_coding
ENSG00000134627.12	76.3301	1.01444	0.164728	6.15828	7.354e-10	1.24682e-08	PIWIL4	protein_coding
ENSG00000134640.3	9.13513	2.75768	0.540658	5.1006	3.38581e-07	3.09509e-06	MTNR1B	protein_coding
ENSG00000134690.11	407.426	1.53159	0.100526	15.2357	2.04863e-52	2.21098e-49	CDCA8	protein_coding
ENSG00000134762.17	9.53684	1.20065	0.28372	4.23182	2.3181e-05	0.000132766	DSC3	protein_coding
ENSG00000134775.15	105.29	1.57526	0.236266	6.66732	2.60513e-11	5.97415e-10	FHOD3	protein_coding
ENSG00000134827.8	9.56269	1.50985	0.348911	4.32732	1.50933e-05	9.1098e-05	TCN1	protein_coding
ENSG00000134940.14	5.43735	1.15574	0.146204	7.90501	2.67904e-15	1.30314e-13	ACRV1	protein_coding
ENSG00000135083.16	68.1864	1.12297	0.184955	6.07161	1.26637e-09	2.05041e-08	CCNJL	protein_coding
ENSG00000135226.18	12.3831	1.09297	0.256269	4.26492	1.99972e-05	0.00011664	UGT2B28	protein_coding
ENSG00000135314.12	9.40013	1.70924	0.219683	7.78049	7.22464e-15	3.19475e-13	KHDC1	protein_coding
ENSG00000135373.13	1075.29	1.11603	0.193632	5.76365	8.23121e-09	1.0997e-07	EHF	protein_coding
ENSG00000135451.13	375.834	1.58682	0.12216	12.9897	1.39897e-38	4.69077e-36	TROAP	protein_coding
ENSG00000135476.12	524.005	1.1007	0.121959	9.02517	1.79423e-19	1.5848e-17	ESPL1	protein_coding
ENSG00000135519.8	45.2162	1.47213	0.208793	7.05069	1.78032e-12	5.16247e-11	KCNH3	protein_coding
ENSG00000135702.14	1.91411	1.55434	0.41119	3.7801	0.000156768	0.000709026	CHST5	protein_coding
ENSG00000135747.11	1.3892	2.27382	0.349252	6.51053	7.4884e-11	1.55889e-09	ZNF670-ZNF695	protein_coding
ENSG00000135902.10	8.1315	1.57007	0.320136	4.90438	9.37244e-07	7.69217e-06	CHRND	protein_coding
ENSG00000135903.20	1.28696	1.50372	0.49155	3.05915	0.00221967	0.00715166	PAX3	protein_coding
ENSG00000136014.12	12.7818	1.26913	0.192731	6.58497	4.54986e-11	9.91381e-10	USP44	protein_coding
ENSG00000136122.18	62.4612	1.02211	0.084712	12.0657	1.60388e-33	4.16478e-31	BORA	protein_coding
ENSG00000136231.14	168.322	2.24708	0.239201	9.3941	5.7711e-21	6.20905e-19	IGF2BP3	protein_coding
ENSG00000136327.7	1.30899	2.00009	0.505615	3.95577	7.62896e-05	0.0003785	NKX2-8	protein_coding
ENSG00000136535.15	0.449302	1.06039	0.355275	2.9847	0.00283853	0.00882926	TBR1	protein_coding
ENSG00000136542.9	13.4676	1.72592	0.233078	7.40489	1.31256e-13	4.62556e-12	GALNT5	protein_coding
ENSG00000136918.8	1.51823	1.04968	0.231412	4.53598	5.73368e-06	3.86679e-05	WDR38	protein_coding
ENSG00000136943.11	156.673	1.48252	0.216363	6.852	7.2824e-12	1.83446e-10	CTSV	protein_coding
ENSG00000137090.12	0.571135	1.64408	0.46654	3.52399	0.000425101	0.00171182	DMRT1	protein_coding
ENSG00000137135.18	200.502	1.14721	0.0927439	12.3696	3.81521e-35	1.08002e-32	ARHGEF39	protein_coding
ENSG00000137203.15	74.7133	1.22085	0.225688	5.40943	6.32254e-08	6.86652e-07	TFAP2A	protein_coding
ENSG00000137310.12	873.743	1.34958	0.102811	13.1268	2.31156e-39	7.9832e-37	TCF19	protein_coding
ENSG00000137392.10	1.56298	2.75486	0.757361	3.63745	0.000275353	0.00116711	CLPS	protein_coding
ENSG00000137648.19	15.9894	1.23096	0.231138	5.32563	1.00603e-07	1.04167e-06	TMPRSS4	protein_coding
ENSG00000137731.14	81.3331	1.16467	0.283019	4.11517	3.86896e-05	0.000208616	FXYD2	protein_coding
ENSG00000137745.12	2.3783	2.27617	0.405337	5.61549	1.96001e-08	2.40124e-07	MMP13	protein_coding
ENSG00000137747.16	19.5722	1.05055	0.187869	5.59193	2.24562e-08	2.71265e-07	TMPRSS13	protein_coding
ENSG00000137757.11	5.83643	1.17309	0.175484	6.68488	2.31116e-11	5.34974e-10	CASP5	protein_coding
ENSG00000137807.16	306.435	1.89766	0.10745	17.6609	8.38841e-70	9.65674e-66	KIF23	protein_coding
ENSG00000137843.12	44.8498	1.65311	0.19691	8.39526	4.64855e-17	2.97852e-15	PAK6	protein_coding
ENSG00000137857.17	180.066	1.12256	0.158722	7.07248	1.52189e-12	4.45423e-11	DUOX1	protein_coding
ENSG00000137868.19	44.3913	1.17571	0.25509	4.60898	4.04644e-06	2.8289e-05	STRA6	protein_coding
ENSG00000137869.15	33.0005	1.40641	0.294445	4.77648	1.78393e-06	1.36668e-05	CYP19A1	protein_coding
ENSG00000137948.18	7.39116	3.64103	0.444335	8.19433	2.51983e-16	1.46506e-14	BRDT	protein_coding
ENSG00000137968.16	233.938	1.0542	0.257279	4.09748	4.17664e-05	0.000223012	SLC44A5	protein_coding
ENSG00000138083.5	2.86117	2.41836	0.436882	5.5355	3.10342e-08	3.63198e-07	SIX3	protein_coding
ENSG00000138160.7	401.128	1.4231	0.0916765	15.5231	2.42257e-54	3.34663e-51	KIF11	protein_coding
ENSG00000138180.16	195.534	1.71821	0.121307	14.1641	1.52753e-45	9.09565e-43	CEP55	protein_coding
ENSG00000138182.15	267.454	1.08721	0.0758641	14.3311	1.39944e-46	9.29441e-44	KIF20B	protein_coding
ENSG00000138311.18	5.39916	1.58667	0.229311	6.91929	4.53911e-12	1.19302e-10	ZNF365	protein_coding
ENSG00000138336.9	73.565	1.45558	0.129707	11.222	3.17897e-29	6.19287e-27	TET1	protein_coding
ENSG00000138376.11	181.697	1.15662	0.0864693	13.3761	8.34434e-41	3.202e-38	BARD1	protein_coding
ENSG00000138587.6	219.935	1.23185	0.192236	6.40802	1.47423e-10	2.90273e-09	MNS1	protein_coding
ENSG00000138622.4	9.94762	2.1011	0.303476	6.92345	4.4079e-12	1.16207e-10	HCN4	protein_coding
ENSG00000138653.10	1.14268	2.70682	0.483811	5.59478	2.20896e-08	2.67211e-07	NDST4	protein_coding
ENSG00000138675.16	0.941118	1.83828	0.500938	3.66967	0.000242862	0.00104465	FGF5	protein_coding
ENSG00000138684.9	1.83167	1.47321	0.366062	4.02448	5.71002e-05	0.000293411	IL21	protein_coding
ENSG00000138759.19	479.895	1.53935	0.255109	6.03409	1.59864e-09	2.52795e-08	FRAS1	protein_coding
ENSG00000138772.13	103.126	1.05704	0.203397	5.19693	2.02608e-07	1.96006e-06	ANXA3	protein_coding
ENSG00000138778.13	254.801	1.69966	0.0993306	17.1112	1.22508e-65	8.46187e-62	CENPE	protein_coding
ENSG00000138798.13	68.3757	1.51726	0.32977	4.60094	4.20579e-06	2.92845e-05	EGF	protein_coding
ENSG00000139219.19	341.246	1.8731	0.39436	4.74973	2.03691e-06	1.53898e-05	COL2A1	protein_coding
ENSG00000139304.16	6.07011	1.02248	0.294808	3.46831	0.000523745	0.00205546	PTPRQ	protein_coding
ENSG00000139354.11	287.824	1.29762	0.0942021	13.7748	3.61322e-43	1.64192e-40	GAS2L3	protein_coding
ENSG00000139445.18	171.222	1.29128	0.258924	4.98712	6.12874e-07	5.26916e-06	FOXN4	protein_coding
ENSG00000139515.6	220.916	1.26099	0.358726	3.51518	0.000439452	0.00176046	PDX1	protein_coding
ENSG00000139572.4	16.3349	1.18524	0.202147	5.86328	4.53817e-09	6.39976e-08	GPR84	protein_coding
ENSG00000139618.16	152.356	1.10993	0.0874975	12.6853	7.13691e-37	2.18124e-34	BRCA2	protein_coding
ENSG00000139800.8	102.095	1.23725	0.254886	4.85413	1.20919e-06	9.65787e-06	ZIC5	protein_coding
ENSG00000139973.16	1.1472	1.44742	0.345988	4.18343	2.87147e-05	0.000159832	SYT16	protein_coding
ENSG00000140015.20	6.0499	1.31282	0.475534	2.76073	0.00576717	0.0162076	KCNH5	protein_coding
ENSG00000140254.12	6.5203	1.01577	0.24721	4.10892	3.97513e-05	0.000213451	DUOXA1	protein_coding
ENSG00000140274.14	132.255	1.82112	0.339136	5.36988	7.8788e-08	8.36723e-07	DUOXA2	protein_coding
ENSG00000140279.13	558.315	2.28686	0.297101	7.69724	1.39038e-14	5.7993e-13	DUOX2	protein_coding
ENSG00000140297.13	373.015	1.70998	0.222526	7.68441	1.53702e-14	6.34959e-13	GCNT3	protein_coding
ENSG00000140451.13	137.303	1.39588	0.116408	11.9912	3.94976e-33	1.01044e-30	PIF1	protein_coding
ENSG00000140481.15	1.48564	1.38005	0.319101	4.3248	1.5267e-05	9.20821e-05	CCDC33	protein_coding
ENSG00000140525.19	465.714	1.36841	0.0864784	15.8237	2.13458e-56	3.3509e-53	FANCI	protein_coding
ENSG00000140534.14	116.904	1.65693	0.118967	13.9276	4.30664e-44	2.12873e-41	TICRR	protein_coding
ENSG00000141391.14	25.7553	1.04641	0.155342	6.73616	1.62629e-11	3.87615e-10	PRELID3A	protein_coding
ENSG00000141655.17	158.562	1.11968	0.141426	7.91713	2.43065e-15	1.18902e-13	TNFRSF11A	protein_coding
ENSG00000141682.12	50.2739	1.19046	0.179615	6.62785	3.40618e-11	7.61397e-10	PMAIP1	protein_coding
ENSG00000141756.19	1512.8	1.16337	0.169341	6.86997	6.42146e-12	1.63307e-10	FKBP10	protein_coding
ENSG00000142149.9	227.896	1.20863	0.21912	5.51585	3.47106e-08	4.01731e-07	HUNK	protein_coding
ENSG00000142698.15	0.559293	1.54722	0.563848	2.74404	0.00606884	0.0169259	C1orf94	protein_coding
ENSG00000142731.11	131.258	1.46391	0.0878246	16.6685	2.21942e-62	9.58122e-59	PLK4	protein_coding
ENSG00000142945.13	448.986	1.52205	0.125492	12.1286	7.447e-34	2.02512e-31	KIF2C	protein_coding
ENSG00000143001.5	8.95375	1.72028	0.247196	6.95919	3.42246e-12	9.21263e-11	TMEM61	protein_coding
ENSG00000143006.7	1.20951	1.9743	0.532846	3.70519	0.000211229	0.000923067	DMRTB1	protein_coding
ENSG00000143061.18	728.55	1.18766	0.152488	7.78854	6.77875e-15	3.01689e-13	IGSF3	protein_coding
ENSG00000143194.13	52.0215	1.52842	0.24138	6.332	2.42004e-10	4.53985e-09	MAEL	protein_coding
ENSG00000143217.9	33.4842	1.09969	0.204133	5.38713	7.15911e-08	7.68803e-07	NECTIN4	protein_coding
ENSG00000143228.13	314.597	1.73215	0.1157	14.971	1.13669e-50	1.15461e-47	NUF2	protein_coding
ENSG00000143452.16	3.60824	1.17377	0.21938	5.3504	8.77593e-08	9.22073e-07	HORMAD1	protein_coding
ENSG00000143476.18	538.404	1.46229	0.10975	13.3239	1.68053e-40	6.30857e-38	DTL	protein_coding
ENSG00000143595.13	24.9723	1.31452	0.360255	3.64886	0.000263408	0.00112185	AQP10	protein_coding
ENSG00000143847.15	36.4796	1.18144	0.211678	5.58128	2.38757e-08	2.86707e-07	PPFIA4	protein_coding
ENSG00000144045.14	110.671	1.04225	0.33277	3.13205	0.00173591	0.00578013	DQX1	protein_coding
ENSG00000144130.11	4.08839	1.36689	0.2416	5.65767	1.53445e-08	1.92915e-07	NT5DC4	protein_coding
ENSG00000144227.5	2.01944	1.97976	0.449929	4.40016	1.0817e-05	6.76276e-05	NXPH2	protein_coding
ENSG00000144354.14	211.774	1.9179	0.206599	9.2832	1.64465e-20	1.66568e-18	CDCA7	protein_coding
ENSG00000144355.15	9.60363	1.02069	0.274838	3.7138	0.000204174	0.000895427	DLX1	protein_coding
ENSG00000144366.16	177.729	1.33998	0.246568	5.43454	5.4938e-08	6.07732e-07	GULP1	protein_coding
ENSG00000144452.15	6.76596	1.49758	0.206113	7.26582	3.70773e-13	1.2126e-11	ABCA12	protein_coding
ENSG00000144554.12	305.789	1.30576	0.0939303	13.9014	6.21012e-44	3.02074e-41	FANCD2	protein_coding
ENSG00000144834.14	1.41656	1.41121	0.293399	4.80986	1.51033e-06	1.17824e-05	TAGLN3	protein_coding
ENSG00000144959.11	529.411	1.42586	0.137535	10.3672	3.49526e-25	5.22564e-23	NCEH1	protein_coding
ENSG00000144962.7	0.638304	1.19881	0.401707	2.98429	0.00284241	0.00883816	SPATA16	protein_coding
ENSG00000145063.15	1.90578	1.05899	0.222337	4.76301	1.90723e-06	1.44925e-05	AC062028.1	lncRNA
ENSG00000145103.15	92.3522	1.2678	0.237958	5.32782	9.9398e-08	1.03078e-06	ILDR1	protein_coding
ENSG00000145242.13	2.05483	2.7712	0.466179	5.94449	2.77315e-09	4.12462e-08	EPHA5	protein_coding
ENSG00000145386.11	543.373	1.62791	0.134881	12.0692	1.5357e-33	4.01794e-31	CCNA2	protein_coding
ENSG00000145526.12	6.18525	2.79523	0.475635	5.87685	4.18141e-09	5.95747e-08	CDH18	protein_coding
ENSG00000145536.15	153.362	1.6147	0.262732	6.1458	7.95624e-10	1.33842e-08	ADAMTS16	protein_coding
ENSG00000145642.12	1.3997	1.02368	0.287639	3.5589	0.000372415	0.00152311	SHISAL2B	protein_coding
ENSG00000145721.12	2.68516	1.26629	0.412881	3.06697	0.00216243	0.00699463	LIX1	protein_coding
ENSG00000145908.12	124.034	1.0967	0.148213	7.39945	1.36754e-13	4.8144e-12	ZNF300	protein_coding
ENSG00000146013.11	9.82725	2.04335	0.290212	7.04088	1.91034e-12	5.49797e-11	GFRA3	protein_coding
ENSG00000146263.11	210.099	1.22615	0.0885506	13.8469	1.32751e-43	6.19553e-41	MMS22L	protein_coding
ENSG00000146267.12	16.7107	1.976	0.265213	7.45062	9.29036e-14	3.35619e-12	FAXC	protein_coding
ENSG00000146276.12	1.85585	1.54315	0.309368	4.98806	6.099e-07	5.2462e-06	GABRR1	protein_coding
ENSG00000146352.13	20.4577	1.93101	0.495792	3.89481	9.82767e-05	0.000472911	CLVS2	protein_coding
ENSG00000146410.12	76.94	1.28983	0.113486	11.3655	6.20787e-30	1.29936e-27	MTFR2	protein_coding
ENSG00000146530.14	16.7641	3.53034	0.32824	10.7554	5.59195e-27	9.32964e-25	VWDE	protein_coding
ENSG00000146670.10	609.844	1.08579	0.111666	9.72359	2.39188e-22	2.91894e-20	CDCA5	protein_coding
ENSG00000146858.8	31.4734	1.35619	0.169926	7.98105	1.45093e-15	7.34743e-14	ZC3HAV1L	protein_coding
ENSG00000146918.20	592.833	1.09878	0.0751111	14.6287	1.84151e-48	1.47903e-45	NCAPG2	protein_coding
ENSG00000146955.11	23.3852	1.27502	0.205075	6.21733	5.05689e-10	8.8923e-09	RAB19	protein_coding
ENSG00000147180.17	92.8648	1.26259	0.1938	6.51492	7.27306e-11	1.51772e-09	ZNF711	protein_coding
ENSG00000147231.14	132.053	1.04693	0.124357	8.41871	3.80657e-17	2.48513e-15	RADX	protein_coding
ENSG00000147246.10	2.51501	1.87846	0.464236	4.04635	5.20233e-05	0.000270136	HTR2C	protein_coding
ENSG00000147255.19	432.244	1.26833	0.227989	5.56313	2.64981e-08	3.14373e-07	IGSF1	protein_coding
ENSG00000147262.4	2.12934	2.54228	0.472463	5.3809	7.41162e-08	7.91734e-07	GPR119	protein_coding
ENSG00000147381.11	18.2702	4.04147	0.66151	6.10946	9.99673e-10	1.6519e-08	MAGEA4	protein_coding
ENSG00000147432.7	0.540311	1.10622	0.405818	2.72591	0.00641251	0.0177354	CHRNB3	protein_coding
ENSG00000147465.12	10.9936	1.02718	0.161094	6.37629	1.81424e-10	3.49451e-09	STAR	protein_coding
ENSG00000147536.12	109.405	1.49487	0.113591	13.1601	1.48898e-39	5.24728e-37	GINS4	protein_coding
ENSG00000148513.18	2.61159	1.17786	0.348174	3.38297	0.00071707	0.00270004	ANKRD30A	protein_coding
ENSG00000148704.13	1.15994	2.37737	0.505627	4.70183	2.57846e-06	1.89548e-05	VAX1	protein_coding
ENSG00000148735.15	28.1118	2.24404	0.260104	8.62748	6.27168e-18	4.56959e-16	PLEKHS1	protein_coding
ENSG00000148773.14	1520.8	1.5679	0.113913	13.764	4.19794e-43	1.88286e-40	MKI67	protein_coding
ENSG00000148942.15	50.2701	1.55661	0.311468	4.99765	5.80337e-07	5.01941e-06	SLC5A12	protein_coding
ENSG00000149021.7	0.841921	1.83279	0.406511	4.50859	6.52609e-06	4.33766e-05	SCGB1A1	protein_coding
ENSG00000149043.16	97.106	1.68481	0.267679	6.29413	3.0912e-10	5.66054e-09	SYT8	protein_coding
ENSG00000149328.15	57.8409	1.10176	0.230969	4.77015	1.84086e-06	1.40624e-05	GLB1L2	protein_coding
ENSG00000149452.16	11.2369	1.62732	0.362174	4.49319	7.01655e-06	4.6245e-05	SLC22A8	protein_coding
ENSG00000149503.13	429.701	1.01375	0.0752174	13.4776	2.11958e-41	8.41399e-39	INCENP	protein_coding
ENSG00000149506.11	2.79883	1.02373	0.232133	4.41011	1.03318e-05	6.50064e-05	ZP1	protein_coding
ENSG00000149554.13	313.164	1.34913	0.0945229	14.273	3.22316e-46	2.10029e-43	CHEK1	protein_coding
ENSG00000149926.13	11.0308	1.27263	0.171025	7.44117	9.9794e-14	3.58635e-12	TLCD3B	protein_coding
ENSG00000149927.18	13.2449	1.16045	0.182814	6.34769	2.18565e-10	4.13836e-09	DOC2A	protein_coding
ENSG00000149948.14	80.4559	3.01295	0.344901	8.73568	2.42197e-18	1.85878e-16	HMGA2	protein_coding
ENSG00000149972.11	12.0337	1.10379	0.305481	3.61328	0.000302347	0.00126629	CNTN5	protein_coding
ENSG00000150275.19	2.55938	1.41104	0.335836	4.20158	2.65054e-05	0.000148941	PCDH15	protein_coding
ENSG00000150556.17	61.3673	2.71647	0.316713	8.57707	9.73169e-18	6.91551e-16	LYPD6B	protein_coding
ENSG00000150750.8	7.47935	2.17116	0.491362	4.41866	9.93137e-06	6.28877e-05	C11orf53	protein_coding
ENSG00000150873.12	6.04438	1.32778	0.17689	7.50623	6.08551e-14	2.27949e-12	C2orf50	protein_coding
ENSG00000151005.5	0.717544	1.93553	0.458898	4.21779	2.46713e-05	0.000140047	TKTL2	protein_coding
ENSG00000151725.12	472.806	1.14324	0.0993552	11.5066	1.22268e-30	2.65576e-28	CENPU	protein_coding
ENSG00000151834.16	60.495	2.17206	0.51448	4.22185	2.42306e-05	0.00013809	GABRA2	protein_coding
ENSG00000151952.16	11.4877	1.07861	0.244573	4.41017	1.03291e-05	6.50008e-05	TMEM132D	protein_coding
ENSG00000152076.19	9.66083	1.25656	0.216162	5.81307	6.13367e-09	8.41942e-08	CCDC74B	protein_coding
ENSG00000152086.9	7.56251	1.24313	0.281994	4.40837	1.04153e-05	6.54483e-05	TUBA3E	protein_coding
ENSG00000152208.13	1.39532	1.45415	0.424246	3.42762	0.000608906	0.00233787	GRID2	protein_coding
ENSG00000152253.9	155.039	1.20231	0.106207	11.3204	1.03952e-29	2.1243e-27	SPC25	protein_coding
ENSG00000152430.18	0.834049	1.64217	0.326261	5.03331	4.82084e-07	4.25051e-06	BOLL	protein_coding
ENSG00000152527.14	100.543	1.14816	0.176939	6.48899	8.64157e-11	1.77964e-09	PLEKHH2	protein_coding
ENSG00000152766.6	139.398	1.21081	0.23367	5.1817	2.19873e-07	2.10815e-06	ANKRD22	protein_coding
ENSG00000153132.13	625.904	1.15206	0.192228	5.99321	2.05738e-09	3.16357e-08	CLGN	protein_coding
ENSG00000153294.12	5.82525	2.32437	0.377894	6.15085	7.70709e-10	1.30094e-08	ADGRF4	protein_coding
ENSG00000153303.17	38.967	1.3234	0.257475	5.1399	2.74883e-07	2.57272e-06	FRMD1	protein_coding
ENSG00000153404.14	50.0589	1.64508	0.260668	6.31101	2.77218e-10	5.12252e-09	PLEKHG4B	protein_coding
ENSG00000153779.11	4.2474	1.09516	0.44817	2.44362	0.0145408	0.0353486	TGIF2LX	protein_coding
ENSG00000154143.3	1.34801	1.12267	0.382537	2.9348	0.00333758	0.0101492	PANX3	protein_coding
ENSG00000154162.15	32.9262	2.6207	0.494442	5.30033	1.15593e-07	1.18001e-06	CDH12	protein_coding
ENSG00000154277.13	254.653	1.14237	0.243627	4.68902	2.74513e-06	2.00435e-05	UCHL1	protein_coding
ENSG00000154645.14	15.4109	1.07691	0.264959	4.06445	4.81461e-05	0.00025251	CHODL	protein_coding
ENSG00000154646.9	33.6347	2.20885	0.511343	4.31969	1.56246e-05	9.39762e-05	TMPRSS15	protein_coding
ENSG00000154760.14	349.813	1.38415	0.197636	7.00354	2.49576e-12	6.93433e-11	SLFN13	protein_coding
ENSG00000154839.10	256.807	1.32092	0.133239	9.91391	3.62182e-23	4.738e-21	SKA1	protein_coding
ENSG00000154920.15	79.0885	1.49183	0.109559	13.6167	3.18747e-42	1.35904e-39	EME1	protein_coding
ENSG00000154997.9	5.99384	2.55691	0.471202	5.42636	5.75142e-08	6.31779e-07	SEPTIN14	protein_coding
ENSG00000155052.14	1.54565	2.06205	0.403623	5.10884	3.24137e-07	2.97328e-06	CNTNAP5	protein_coding
ENSG00000155066.16	37.7503	1.7479	0.211142	8.27832	1.24927e-16	7.62277e-15	PROM2	protein_coding
ENSG00000155622.7	2.34307	2.91256	0.544423	5.34981	8.80442e-08	9.24505e-07	XAGE2	protein_coding
ENSG00000155761.14	6.43599	2.11704	0.245157	8.63546	5.8489e-18	4.2887e-16	SPAG17	protein_coding
ENSG00000155816.20	6.4619	2.20498	0.3417	6.45299	1.09668e-10	2.20845e-09	FMN2	protein_coding
ENSG00000155918.8	0.956852	1.18957	0.369667	3.21796	0.00129106	0.00449069	RAET1L	protein_coding
ENSG00000155980.13	12.9409	1.08993	0.219408	4.9676	6.77867e-07	5.77617e-06	KIF5A	protein_coding
ENSG00000156009.10	12.4134	1.71517	0.385248	4.45212	8.50247e-06	5.47328e-05	MAGEA8	protein_coding
ENSG00000156150.9	5.11341	1.36185	0.448948	3.03343	0.00241791	0.00768286	ALX3	protein_coding
ENSG00000156269.5	42.4275	2.92799	0.538911	5.43316	5.53658e-08	6.11876e-07	NAA11	protein_coding
ENSG00000156395.13	3.87705	2.1698	0.528751	4.10362	4.06728e-05	0.000217712	SORCS3	protein_coding
ENSG00000156414.19	12.6011	1.17352	0.194226	6.04204	1.52176e-09	2.42079e-08	TDRD9	protein_coding
ENSG00000156475.18	65.852	1.6127	0.191761	8.40994	4.10212e-17	2.65301e-15	PPP2R2B	protein_coding
ENSG00000156509.14	67.6331	1.24603	0.11923	10.4506	1.45536e-25	2.22399e-23	FBXO43	protein_coding
ENSG00000156687.11	9.8411	1.32561	0.434694	3.04952	0.00229205	0.00734578	UNC5D	protein_coding
ENSG00000156689.7	2.12486	1.76195	0.270339	6.51757	7.14563e-11	1.49565e-09	GLYATL2	protein_coding
ENSG00000156711.17	878.851	1.13148	0.183426	6.16859	6.89021e-10	1.17919e-08	MAPK13	protein_coding
ENSG00000156970.13	217.57	2.00092	0.108934	18.3681	2.36333e-75	8.16199e-71	BUB1B	protein_coding
ENSG00000157005.4	4.99822	3.04815	0.728401	4.18472	2.85518e-05	0.000159094	SST	protein_coding
ENSG00000157193.18	57.8608	1.54909	0.161357	9.60039	7.96427e-22	9.26108e-20	LRP8	protein_coding
ENSG00000157330.10	2.32806	1.32983	0.373294	3.56242	0.000367447	0.00150518	C1orf158	protein_coding
ENSG00000157423.18	22.9261	1.03514	0.273156	3.78957	0.000150911	0.000686404	HYDIN	protein_coding
ENSG00000157456.8	490.609	1.50498	0.111947	13.4437	3.35382e-41	1.31622e-38	CCNB2	protein_coding
ENSG00000157470.12	54.8543	1.01401	0.154877	6.5472	5.86239e-11	1.24593e-09	FAM81A	protein_coding
ENSG00000157502.13	86.2479	1.06908	0.309729	3.45166	0.00055715	0.00216564	PWWP3B	protein_coding
ENSG00000157703.16	2.34513	1.29094	0.274824	4.69733	2.63589e-06	1.93276e-05	SVOPL	protein_coding
ENSG00000157765.13	203.002	1.62122	0.33	4.91279	8.9789e-07	7.39782e-06	SLC34A2	protein_coding
ENSG00000157833.13	126.177	1.06836	0.15421	6.92795	4.26977e-12	1.13083e-10	GAREM2	protein_coding
ENSG00000157851.17	1.96286	1.26336	0.353446	3.57442	0.000351009	0.00144659	DPYSL5	protein_coding
ENSG00000158163.15	68.2204	1.273	0.146846	8.66891	4.3629e-18	3.23341e-16	DZIP1L	protein_coding
ENSG00000158402.20	227.105	1.11332	0.128956	8.63333	5.95924e-18	4.35113e-16	CDC25C	protein_coding
ENSG00000158516.12	13.739	3.76412	0.406256	9.2654	1.94347e-20	1.92873e-18	CPA2	protein_coding
ENSG00000158639.13	128.929	1.08347	0.312896	3.46273	0.000534725	0.00209237	PAGE5	protein_coding
ENSG00000159164.10	88.0026	1.17229	0.160329	7.3118	2.6359e-13	8.78702e-12	SV2A	protein_coding
ENSG00000159184.8	40.7783	2.58349	0.437836	5.90059	3.62214e-09	5.23407e-08	HOXB13	protein_coding
ENSG00000159259.8	298.148	1.52788	0.112891	13.5341	9.8419e-42	4.04643e-39	CHAF1B	protein_coding
ENSG00000159337.7	1.91891	1.43062	0.314076	4.55501	5.23821e-06	3.55765e-05	PLA2G4D	protein_coding
ENSG00000159556.10	13.2238	1.21938	0.250149	4.8746	1.09032e-06	8.81236e-06	ISL2	protein_coding
ENSG00000160181.9	36.6091	1.1345	0.39755	2.85374	0.00432082	0.0126826	TFF2	protein_coding
ENSG00000160182.3	28.3301	1.00944	0.399101	2.52928	0.0114298	0.0288976	TFF1	protein_coding
ENSG00000160183.17	461.413	1.0228	0.240404	4.25453	2.09493e-05	0.000121434	TMPRSS3	protein_coding
ENSG00000160229.13	20.5977	1.4441	0.167527	8.62012	6.68826e-18	4.84247e-16	ZNF66	protein_coding
ENSG00000160298.18	190.909	1.0768	0.0927262	11.6127	3.55288e-31	7.96769e-29	C21orf58	protein_coding
ENSG00000160321.15	34.8229	1.33191	0.224495	5.93292	2.97585e-09	4.39205e-08	ZNF208	protein_coding
ENSG00000160352.16	76.7828	1.33602	0.151877	8.79669	1.40909e-18	1.12388e-16	ZNF714	protein_coding
ENSG00000160472.5	0.591429	1.30035	0.291414	4.46223	8.11117e-06	5.2537e-05	TMEM190	protein_coding
ENSG00000160505.16	2.2757	1.22732	0.389439	3.1515	0.00162436	0.00546986	NLRP4	protein_coding
ENSG00000160886.13	9.30146	1.83762	0.290585	6.32388	2.55082e-10	4.75162e-09	LY6K	protein_coding
ENSG00000161609.10	16.4316	1.06983	0.295785	3.61692	0.000298125	0.00125076	KASH5	protein_coding
ENSG00000161800.13	718.204	1.13916	0.0820156	13.8896	7.32352e-44	3.51285e-41	RACGAP1	protein_coding
ENSG00000162063.13	344.87	1.01863	0.0900707	11.3092	1.18114e-29	2.35792e-27	CCNF	protein_coding
ENSG00000162069.16	64.2302	1.89073	0.327658	5.77043	7.90674e-09	1.06211e-07	BICDL2	protein_coding
ENSG00000162073.14	161.978	1.27812	0.113582	11.2528	2.2435e-29	4.40237e-27	PAQR4	protein_coding
ENSG00000162078.11	82.2482	1.60415	0.246613	6.50473	7.78306e-11	1.61245e-09	ZG16B	protein_coding
ENSG00000162399.9	7.0722	1.25936	0.284244	4.43057	9.39855e-06	5.99313e-05	BSND	protein_coding
ENSG00000162437.14	305.551	1.02628	0.134235	7.64539	2.08307e-14	8.44379e-13	RAVER2	protein_coding
ENSG00000162624.14	1.23579	2.95344	0.686821	4.30016	1.70673e-05	0.000101452	LHX8	protein_coding
ENSG00000162630.6	35.5967	1.55047	0.21076	7.35655	1.88722e-13	6.44679e-12	B3GALT2	protein_coding
ENSG00000162670.11	19.7344	1.86176	0.410482	4.53556	5.74513e-06	3.87167e-05	BRINP3	protein_coding
ENSG00000162738.6	133.869	1.06939	0.226126	4.72918	2.25427e-06	1.67969e-05	VANGL2	protein_coding
ENSG00000162761.14	5.27407	1.19887	0.27253	4.39904	1.08731e-05	6.79659e-05	LMX1A	protein_coding
ENSG00000162782.16	18.0954	2.78318	0.357458	7.78602	6.9153e-15	3.06975e-13	TDRD5	protein_coding
ENSG00000162873.15	27.0864	1.405	0.238983	5.87908	4.12564e-09	5.88773e-08	KLHDC8A	protein_coding
ENSG00000162888.4	1.86929	1.1112	0.188747	5.88722	3.9274e-09	5.63041e-08	C1orf147	lncRNA
ENSG00000162931.12	29.7073	1.53312	0.233607	6.56284	5.2793e-11	1.13333e-09	TRIM17	protein_coding
ENSG00000162949.16	56.8069	1.04123	0.339081	3.07075	0.00213519	0.00691753	CAPN13	protein_coding
ENSG00000163013.12	97.7863	1.02864	0.150152	6.85066	7.35087e-12	1.84901e-10	FBXO41	protein_coding
ENSG00000163082.10	282.039	1.88628	0.235927	7.99516	1.29402e-15	6.66027e-14	SGPP2	protein_coding
ENSG00000163092.21	1.7486	2.88418	0.452995	6.36691	1.92871e-10	3.69849e-09	XIRP2	protein_coding
ENSG00000163218.15	1.90767	1.47245	0.315679	4.66438	3.09555e-06	2.22493e-05	PGLYRP4	protein_coding
ENSG00000163235.16	274.335	1.01413	0.191829	5.28661	1.24603e-07	1.25974e-06	TGFA	protein_coding
ENSG00000163362.11	341.208	1.62488	0.220517	7.36849	1.72574e-13	5.94812e-12	INAVA	protein_coding
ENSG00000163485.17	149.009	1.07856	0.219985	4.90291	9.44273e-07	7.74274e-06	ADORA1	protein_coding
ENSG00000163507.14	160.159	1.68092	0.101102	16.626	4.51773e-62	1.7336e-58	CIP2A	protein_coding
ENSG00000163535.18	208.496	1.39339	0.0898503	15.5079	3.06681e-54	4.07367e-51	SGO2	protein_coding
ENSG00000163618.18	32.7404	2.47838	0.292812	8.46408	2.58183e-17	1.72802e-15	CADPS	protein_coding
ENSG00000163623.9	0.36712	1.42647	0.607198	2.34927	0.0188103	0.0438239	NKX6-1	protein_coding
ENSG00000163734.4	35.909	1.02116	0.195454	5.22455	1.74579e-07	1.70752e-06	CXCL3	protein_coding
ENSG00000163735.7	193.381	3.2964	0.332867	9.90305	4.03761e-23	5.262e-21	CXCL5	protein_coding
ENSG00000163739.5	467.156	1.12733	0.265683	4.24312	2.2043e-05	0.00012688	CXCL1	protein_coding
ENSG00000163808.17	177.018	1.90979	0.116248	16.4286	1.194e-60	2.94543e-57	KIF15	protein_coding
ENSG00000163814.8	225.718	1.3646	0.211559	6.45022	1.11689e-10	2.24391e-09	CDCP1	protein_coding
ENSG00000163898.10	103.788	1.18093	0.22016	5.36397	8.14145e-08	8.62495e-07	LIPH	protein_coding
ENSG00000164007.11	59.328	1.05201	0.279103	3.76926	0.000163729	0.000736751	CLDN19	protein_coding
ENSG00000164045.12	204.12	1.2007	0.123375	9.73212	2.1995e-22	2.70327e-20	CDC25A	protein_coding
ENSG00000164078.13	143.096	1.45029	0.210153	6.9011	5.16028e-12	1.33795e-10	MST1R	protein_coding
ENSG00000164093.17	14.7802	1.81628	0.401003	4.52933	5.917e-06	3.97081e-05	PITX2	protein_coding
ENSG00000164099.3	34.5686	1.70748	0.272068	6.27594	3.47521e-10	6.3102e-09	PRSS12	protein_coding
ENSG00000164109.14	388.742	1.28162	0.0920017	13.9304	4.14003e-44	2.10265e-41	MAD2L1	protein_coding
ENSG00000164112.13	4.88674	1.02661	0.241177	4.25669	2.07475e-05	0.000120487	TMEM155	protein_coding
ENSG00000164113.11	0.776247	2.34242	0.797618	2.93677	0.00331651	0.0100942	ADAD1	protein_coding
ENSG00000164181.14	452.343	1.66565	0.219673	7.58239	3.39241e-14	1.32986e-12	ELOVL7	protein_coding
ENSG00000164236.12	98.7301	1.18334	0.177915	6.65112	2.90864e-11	6.56984e-10	ANKRD33B	protein_coding
ENSG00000164303.11	40.376	1.07993	0.256882	4.20399	2.62247e-05	0.000147628	ENPP6	protein_coding
ENSG00000164362.21	231.607	1.25038	0.27295	4.58099	4.62779e-06	3.1914e-05	TERT	protein_coding
ENSG00000164385.9	2.23908	1.34797	0.231467	5.8236	5.75931e-09	7.94027e-08	LINC01600	lncRNA
ENSG00000164393.8	0.659242	1.37559	0.362247	3.79739	0.000146226	0.000668175	ADGRF2	protein_coding
ENSG00000164411.12	1.40443	1.52259	0.301263	5.05403	4.32581e-07	3.85937e-06	GJB7	protein_coding
ENSG00000164418.21	20.2712	1.514	0.265266	5.70749	1.14653e-08	1.48469e-07	GRIK2	protein_coding
ENSG00000164649.20	221.581	1.28754	0.134818	9.55024	1.29401e-21	1.4798e-19	CDCA7L	protein_coding
ENSG00000164651.17	24.0508	2.24646	0.426869	5.26265	1.41992e-07	1.41811e-06	SP8	protein_coding
ENSG00000164744.13	2.51009	1.45864	0.263961	5.52599	3.27632e-08	3.81623e-07	SUN3	protein_coding
ENSG00000164756.12	3.53684	2.09127	0.353328	5.91878	3.2433e-09	4.74741e-08	SLC30A8	protein_coding
ENSG00000164794.9	1.07328	2.02597	0.54378	3.72571	0.000194766	0.00085972	KCNV1	protein_coding
ENSG00000164796.18	8.3621	1.75665	0.40755	4.31027	1.63053e-05	9.75226e-05	CSMD3	protein_coding
ENSG00000164946.20	39.0438	1.72368	0.262987	6.55424	5.59276e-11	1.19156e-09	FREM1	protein_coding
ENSG00000165066.13	2.17845	2.97738	0.5643	5.27623	1.3187e-07	1.32623e-06	NKX6-3	protein_coding
ENSG00000165125.22	59.6731	1.58805	0.307724	5.16062	2.46128e-07	2.32884e-06	TRPV6	protein_coding
ENSG00000165131.8	0.589436	1.25634	0.380212	3.30432	0.000952075	0.00345133	LLCFC1	protein_coding
ENSG00000165181.16	7.46056	1.07075	0.18686	5.73025	1.00283e-08	1.31189e-07	SHOC1	protein_coding
ENSG00000165192.14	5.09584	2.18072	0.278331	7.83498	4.68935e-15	2.15647e-13	ASB11	protein_coding
ENSG00000165238.16	673.094	1.50295	0.270656	5.553	2.80803e-08	3.3155e-07	WNK2	protein_coding
ENSG00000165300.7	8.58855	1.11065	0.230829	4.81157	1.49747e-06	1.16927e-05	SLITRK5	protein_coding
ENSG00000165304.8	334.758	1.56496	0.107939	14.4986	1.23562e-47	9.07943e-45	MELK	protein_coding
ENSG00000165309.14	3.45904	2.08561	0.307651	6.77914	1.2089e-11	2.94641e-10	ARMC3	protein_coding
ENSG00000165325.14	3.16084	1.15429	0.203712	5.6663	1.4591e-08	1.84517e-07	DEUP1	protein_coding
ENSG00000165480.16	206.97	1.48188	0.11194	13.2382	5.28129e-40	1.91994e-37	SKA3	protein_coding
ENSG00000165490.13	105.217	1.0988	0.0870692	12.6198	1.64214e-36	4.88905e-34	DDIAS	protein_coding
ENSG00000165496.5	8.62346	1.0926	0.359646	3.03798	0.00238167	0.00758515	RPL10L	protein_coding
ENSG00000165509.13	2.62138	1.28952	0.454366	2.83806	0.00453883	0.0132348	MAGEC3	protein_coding
ENSG00000165553.4	0.492339	1.09369	0.464946	2.3523	0.0186579	0.0435637	NGB	protein_coding
ENSG00000165556.10	11.6928	2.03941	0.251124	8.12114	4.61826e-16	2.5438e-14	CDX2	protein_coding
ENSG00000165583.15	6.98058	1.1942	0.498575	2.39523	0.0166099	0.0395178	SSX5	protein_coding
ENSG00000165730.16	65.641	1.12159	0.185979	6.03071	1.63241e-09	2.57782e-08	STOX1	protein_coding
ENSG00000165816.13	10.75	1.14321	0.242502	4.71421	2.42653e-06	1.79487e-05	VWA2	protein_coding
ENSG00000165821.12	181.721	1.40753	0.183243	7.68123	1.57567e-14	6.49371e-13	SALL2	protein_coding
ENSG00000165891.16	93.55	1.53193	0.139275	10.9993	3.85015e-28	6.85405e-26	E2F7	protein_coding
ENSG00000165905.18	358.419	1.33608	0.186037	7.1818	6.87998e-13	2.15614e-11	LARGE2	protein_coding
ENSG00000165970.12	0.536133	1.58256	0.557947	2.8364	0.00456256	0.0132917	SLC6A5	protein_coding
ENSG00000165973.19	2.61597	1.42068	0.511359	2.77824	0.00546547	0.015473	NELL1	protein_coding
ENSG00000166049.11	1.07362	2.09134	0.68794	3.04001	0.00236572	0.00753853	PASD1	protein_coding
ENSG00000166145.14	1416.14	1.62852	0.238592	6.82553	8.76008e-12	2.17402e-10	SPINT1	protein_coding
ENSG00000166206.15	214.503	1.12587	0.333168	3.37928	0.000726757	0.00273175	GABRB3	protein_coding
ENSG00000166396.13	1.34041	1.68861	0.571728	2.95352	0.0031417	0.00963161	SERPINB7	protein_coding
ENSG00000166448.15	29.7214	1.42296	0.242245	5.87407	4.25227e-09	6.05135e-08	TMEM130	protein_coding
ENSG00000166670.10	32.215	2.37258	0.257014	9.23132	2.67309e-20	2.5915e-18	MMP10	protein_coding
ENSG00000166736.11	10.3138	2.04901	0.304022	6.73969	1.58729e-11	3.80157e-10	HTR3A	protein_coding
ENSG00000166845.15	70.5059	1.14569	0.103951	11.0215	3.01089e-28	5.44419e-26	C18orf54	protein_coding
ENSG00000166851.15	440.436	1.64482	0.115425	14.2501	4.47894e-46	2.86453e-43	PLK1	protein_coding
ENSG00000166863.13	8.22557	1.18452	0.245007	4.83465	1.33378e-06	1.0536e-05	TAC3	protein_coding
ENSG00000166869.3	22.629	3.32383	0.501412	6.62895	3.38089e-11	7.56233e-10	CHP2	protein_coding
ENSG00000166920.13	96.2175	1.36103	0.210516	6.46521	1.01157e-10	2.05141e-09	C15orf48	protein_coding
ENSG00000166959.8	15.7084	2.21245	0.415978	5.31867	1.04529e-07	1.07826e-06	MS4A8	protein_coding
ENSG00000166961.15	0.772672	1.54175	0.40813	3.77759	0.00015835	0.000715622	MS4A15	protein_coding
ENSG00000166984.12	7.03754	1.34084	0.312003	4.29752	1.72716e-05	0.000102525	TCP10L2	protein_coding
ENSG00000167080.9	196.191	1.21499	0.382246	3.17854	0.00148018	0.00505682	B4GALNT2	protein_coding
ENSG00000167117.10	2.7832	1.02903	0.229032	4.49296	7.02402e-06	4.62765e-05	ANKRD40CL	protein_coding
ENSG00000167183.3	365.401	1.21275	0.227705	5.32595	1.00425e-07	1.04059e-06	PRR15L	protein_coding
ENSG00000167311.14	12.2332	1.2573	0.271783	4.62611	3.72595e-06	2.62504e-05	ART5	protein_coding
ENSG00000167355.8	6.50386	1.72963	0.32357	5.34545	9.01929e-08	9.44196e-07	OR51B5	protein_coding
ENSG00000167554.15	40.8399	1.03778	0.173821	5.97042	2.36642e-09	3.58564e-08	ZNF610	protein_coding
ENSG00000167608.12	775.92	1.54288	0.225323	6.84741	7.51981e-12	1.88876e-10	TMC4	protein_coding
ENSG00000167612.13	33.332	1.91792	0.376252	5.09743	3.44304e-07	3.14075e-06	ANKRD33	protein_coding
ENSG00000167614.14	85.4323	1.89677	0.22397	8.46883	2.47876e-17	1.66874e-15	TTYH1	protein_coding
ENSG00000167741.11	62.5318	2.43194	0.302452	8.04074	8.93008e-16	4.7302e-14	GGT6	protein_coding
ENSG00000167757.14	9.52475	1.52045	0.388258	3.91608	9.00009e-05	0.000437847	KLK11	protein_coding
ENSG00000167767.14	199.605	1.94567	0.245245	7.93358	2.12926e-15	1.05504e-13	KRT80	protein_coding
ENSG00000167771.6	42.9995	1.90212	0.209869	9.06337	1.26484e-19	1.13757e-17	RCOR2	protein_coding
ENSG00000167880.8	198.197	1.46328	0.271879	5.3821	7.36232e-08	7.87198e-07	EVPL	protein_coding
ENSG00000167971.16	13.397	1.34636	0.235517	5.71662	1.08665e-08	1.41191e-07	CASKIN1	protein_coding
ENSG00000168032.10	13.4913	1.33749	0.262757	5.09021	3.57665e-07	3.25318e-06	ENTPD3	protein_coding
ENSG00000168060.16	258.491	1.43716	0.180018	7.98338	1.42376e-15	7.23101e-14	NAALADL1	protein_coding
ENSG00000168078.10	288.17	1.36603	0.120732	11.3145	1.11192e-29	2.24569e-27	PBK	protein_coding
ENSG00000168126.3	0.625269	1.59802	0.272593	5.86229	4.56536e-09	6.43286e-08	OR2W6P	unprocessed_pseudogene
ENSG00000168143.9	8.29369	2.07735	0.397934	5.22034	1.78596e-07	1.74434e-06	FAM83B	protein_coding
ENSG00000168267.7	2.6104	2.10714	0.479725	4.39238	1.12116e-05	6.98167e-05	PTF1A	protein_coding
ENSG00000168502.17	285.009	1.09133	0.167687	6.5081	7.61073e-11	1.58245e-09	MTCL1	protein_coding
ENSG00000168539.4	1.90619	1.09488	0.3914	2.79735	0.00515239	0.0147331	CHRM1	protein_coding
ENSG00000168671.10	108.38	1.55087	0.251898	6.15675	7.42548e-10	1.25709e-08	UGT3A2	protein_coding
ENSG00000168676.11	1.86463	1.24227	0.251507	4.93932	7.83974e-07	6.55736e-06	KCTD19	protein_coding
ENSG00000168743.13	820.778	1.12884	0.189775	5.94834	2.7088e-09	4.04632e-08	NPNT	protein_coding
ENSG00000168754.15	60.2608	1.36015	0.352533	3.85823	0.00011421	0.00053929	FAM178B	protein_coding
ENSG00000168779.20	18.9544	1.44945	0.206139	7.03143	2.04421e-12	5.825e-11	SHOX2	protein_coding
ENSG00000168843.14	66.8823	1.1086	0.400659	2.76694	0.00565854	0.0159334	FSTL5	protein_coding
ENSG00000168907.13	11.3878	1.6755	0.310224	5.40095	6.62901e-08	7.17229e-07	PLA2G4F	protein_coding
ENSG00000168959.14	1.43616	1.48319	0.422717	3.5087	0.000450302	0.00179933	GRM5	protein_coding
ENSG00000169059.12	5.65686	1.33997	0.402389	3.33004	0.000868347	0.00318729	VCX3A	protein_coding
ENSG00000169064.13	1.15729	1.39777	0.370594	3.77171	0.000162134	0.00072981	ZBBX	protein_coding
ENSG00000169067.4	1.42144	1.37877	0.356733	3.86499	0.000111093	0.000526298	ACTBL2	protein_coding
ENSG00000169194.9	3.83752	1.24948	0.287355	4.34822	1.37246e-05	8.36998e-05	IL13	protein_coding
ENSG00000169297.8	23.0231	1.82868	0.456857	4.00274	6.26143e-05	0.0003181	NR0B1	protein_coding
ENSG00000169385.3	20.6563	1.38844	0.216681	6.40775	1.47685e-10	2.90624e-09	RNASE2	protein_coding
ENSG00000169427.8	63.0873	1.0551	0.30398	3.47097	0.000518591	0.00203662	KCNK9	protein_coding
ENSG00000169548.3	1.98691	2.46405	0.429642	5.73512	9.74422e-09	1.2786e-07	ZNF280A	protein_coding
ENSG00000169550.14	49.364	1.18831	0.453126	2.62247	0.00872958	0.0230018	MUC15	protein_coding
ENSG00000169551.13	3.4579	2.07378	0.546865	3.79212	0.000149366	0.000680273	CT55	protein_coding
ENSG00000169583.13	52.41	1.14076	0.179128	6.3684	1.91004e-10	3.66881e-09	CLIC3	protein_coding
ENSG00000169607.13	212.676	1.70966	0.103567	16.5078	3.22206e-61	9.96127e-58	CKAP2L	protein_coding
ENSG00000169618.7	7.49234	2.36171	0.271608	8.69529	3.45945e-18	2.60864e-16	PROKR1	protein_coding
ENSG00000169679.15	387.472	1.6219	0.104149	15.573	1.11148e-54	1.59942e-51	BUB1	protein_coding
ENSG00000169760.17	7.12	1.46077	0.258163	5.65833	1.52854e-08	1.92242e-07	NLGN1	protein_coding
ENSG00000169836.5	0.753817	2.36835	0.557038	4.25169	2.12165e-05	0.000122818	TACR3	protein_coding
ENSG00000169862.19	472.949	1.88628	0.326146	5.78353	7.31484e-09	9.91465e-08	CTNND2	protein_coding
ENSG00000170044.8	62.5807	3.72829	0.349777	10.6591	1.58191e-26	2.60157e-24	ZPLD1	protein_coding
ENSG00000170074.19	12.1668	1.18379	0.248879	4.75647	1.97005e-06	1.49271e-05	FAM153A	protein_coding
ENSG00000170162.14	1.55717	2.51129	0.740761	3.39016	0.00069853	0.00263684	VGLL2	protein_coding
ENSG00000170178.7	0.517845	1.29904	0.533303	2.43583	0.0148575	0.035988	HOXD12	protein_coding
ENSG00000170231.16	12.0304	1.70353	0.326687	5.21457	1.84248e-07	1.79599e-06	FABP6	protein_coding
ENSG00000170312.16	726.524	1.51564	0.108336	13.9902	1.78897e-44	9.50523e-42	CDK1	protein_coding
ENSG00000170324.21	3.74663	1.38279	0.278341	4.96797	6.76578e-07	5.76915e-06	FRMPD2	protein_coding
ENSG00000170381.14	100.503	3.64607	0.355236	10.2638	1.02567e-24	1.47593e-22	SEMA3E	protein_coding
ENSG00000170396.9	13.03	1.1391	0.234316	4.86139	1.16565e-06	9.3512e-06	ZNF804A	protein_coding
ENSG00000170454.6	0.772426	1.48437	0.459068	3.23345	0.00122305	0.00429043	KRT75	protein_coding
ENSG00000170477.13	3.94371	1.43339	0.507559	2.82409	0.00474158	0.0137309	KRT4	protein_coding
ENSG00000170577.8	49.7977	1.73345	0.261477	6.62945	3.36944e-11	7.54557e-10	SIX2	protein_coding
ENSG00000170689.10	9.96843	2.14302	0.304199	7.0448	1.85731e-12	5.36323e-11	HOXB9	protein_coding
ENSG00000170703.15	19.21	1.33939	0.203469	6.58278	4.61733e-11	1.00481e-09	TTLL6	protein_coding
ENSG00000170819.5	12.8412	1.01967	0.211786	4.81463	1.47473e-06	1.15307e-05	BFSP2	protein_coding
ENSG00000170837.3	33.0279	1.03457	0.286949	3.60541	0.000311658	0.00130085	GPR27	protein_coding
ENSG00000170893.4	0.93852	1.22612	0.410975	2.98343	0.00285034	0.00885963	TRH	protein_coding
ENSG00000170950.6	0.755555	1.19224	0.386372	3.08573	0.00203051	0.00661814	PGK2	protein_coding
ENSG00000170954.11	56.1164	1.02168	0.160458	6.3673	1.92381e-10	3.6932e-09	ZNF415	protein_coding
ENSG00000170965.10	2.62581	1.73612	0.299471	5.79729	6.73944e-09	9.1961e-08	PLAC1	protein_coding
ENSG00000171004.18	116.793	2.14052	0.335215	6.38553	1.70803e-10	3.31025e-09	HS6ST2	protein_coding
ENSG00000171033.13	42.2269	1.6778	0.217328	7.7201	1.16236e-14	4.93769e-13	PKIA	protein_coding
ENSG00000171126.8	1.96392	2.11111	0.364045	5.79902	6.67041e-09	9.10551e-08	KCNG3	protein_coding
ENSG00000171136.7	1.2135	1.72027	0.446391	3.85372	0.000116337	0.000548058	RLN3	protein_coding
ENSG00000171219.9	262.398	1.02313	0.172463	5.93249	2.98381e-09	4.40105e-08	CDC42BPG	protein_coding
ENSG00000171241.9	199.349	1.55084	0.125818	12.3261	6.55402e-35	1.84024e-32	SHCBP1	protein_coding
ENSG00000171243.8	29.3649	1.27473	0.245059	5.20175	1.97424e-07	1.91416e-06	SOSTDC1	protein_coding
ENSG00000171246.6	12.036	1.31233	0.259955	5.0483	4.45769e-07	3.96474e-06	NPTX1	protein_coding
ENSG00000171320.15	110.58	1.39406	0.118715	11.7429	7.67997e-32	1.80432e-29	ESCO2	protein_coding
ENSG00000171345.13	1182.56	2.21065	0.310744	7.11406	1.12674e-12	3.37203e-11	KRT19	protein_coding
ENSG00000171431.4	48.8785	1.60923	0.379625	4.239	2.24513e-05	0.000128993	KRT20	protein_coding
ENSG00000171435.14	15.0024	1.12312	0.224531	5.00205	5.67224e-07	4.91832e-06	KSR2	protein_coding
ENSG00000171450.6	1.18756	1.38449	0.394751	3.50724	0.000452775	0.00180817	CDK5R2	protein_coding
ENSG00000171483.13	0.422203	1.31164	0.482719	2.7172	0.00658374	0.0181147	SSX6P	transcribed_unprocessed_pseudogene
ENSG00000171502.15	52.646	1.59376	0.239343	6.65889	2.75909e-11	6.27308e-10	COL24A1	protein_coding
ENSG00000171649.12	64.5912	1.13274	0.152475	7.42898	1.09435e-13	3.91246e-12	ZIK1	protein_coding
ENSG00000171848.16	1422.76	1.18469	0.108774	10.8912	1.26933e-27	2.19187e-25	RRM2	protein_coding
ENSG00000171877.21	3.66956	1.62212	0.22085	7.3449	2.05919e-13	6.99274e-12	FRMD5	protein_coding
ENSG00000172000.7	10.8988	1.78012	0.238702	7.45749	8.81849e-14	3.20585e-12	ZNF556	protein_coding
ENSG00000172179.12	0.506834	1.2953	0.549985	2.35516	0.0185148	0.0432835	PRL	protein_coding
ENSG00000172238.6	0.588594	1.55093	0.619565	2.50325	0.0123057	0.0307296	ATOH1	protein_coding
ENSG00000172367.16	8.75304	1.25908	0.237519	5.30096	1.15197e-07	1.1767e-06	PDZD3	protein_coding
ENSG00000172379.21	222.656	1.49853	0.209316	7.15918	8.11589e-13	2.50483e-11	ARNT2	protein_coding
ENSG00000172461.11	0.516589	1.3339	0.520387	2.56329	0.0103684	0.0265818	FUT9	protein_coding
ENSG00000172551.11	5.37613	1.33826	0.370836	3.60877	0.000307656	0.00128603	MUCL1	protein_coding
ENSG00000172687.13	65.6718	1.36525	0.130399	10.4698	1.18906e-25	1.83327e-23	ZNF738	protein_coding
ENSG00000173040.13	104.795	1.07302	0.180586	5.94184	2.81836e-09	4.18644e-08	EVC2	protein_coding
ENSG00000173080.6	2.482	1.3208	0.288649	4.5758	4.74394e-06	3.25978e-05	RXFP4	protein_coding
ENSG00000173157.17	4.34304	1.85835	0.378522	4.90949	9.13119e-07	7.51023e-06	ADAMTS20	protein_coding
ENSG00000173253.15	2.08721	1.72056	0.402224	4.2776	1.88917e-05	0.000110979	DMRT2	protein_coding
ENSG00000173467.9	5.70834	1.60411	0.408334	3.92842	8.55075e-05	0.000418403	AGR3	protein_coding
ENSG00000173930.9	203.5	1.35334	0.262934	5.14705	2.64617e-07	2.4854e-06	SLCO4C1	protein_coding
ENSG00000173947.14	18.5327	1.11492	0.214757	5.19152	2.08589e-07	2.01168e-06	PIFO	protein_coding
ENSG00000174123.11	33.1981	1.39157	0.199633	6.97065	3.15476e-12	8.58573e-11	TLR10	protein_coding
ENSG00000174145.8	43.0723	2.2011	0.33483	6.57377	4.90561e-11	1.06086e-09	NWD2	protein_coding
ENSG00000174343.6	0.739055	1.35668	0.40402	3.35797	0.000785176	0.00292239	CHRNA9	protein_coding
ENSG00000174358.16	57.0581	1.20298	0.386025	3.11632	0.00183121	0.00605541	SLC6A19	protein_coding
ENSG00000174371.17	228.762	1.3274	0.112833	11.7643	5.96157e-32	1.4102e-29	EXO1	protein_coding
ENSG00000174482.10	1.01333	1.08058	0.367996	2.9364	0.00332044	0.0101035	LINGO2	protein_coding
ENSG00000174498.14	39.9428	2.00905	0.321216	6.25452	3.98738e-10	7.14996e-09	IGDCC3	protein_coding
ENSG00000174502.19	20.9841	2.06372	0.258833	7.97317	1.54651e-15	7.7631e-14	SLC26A9	protein_coding
ENSG00000174607.11	25.6041	1.46296	0.297007	4.92569	8.40634e-07	6.98224e-06	UGT8	protein_coding
ENSG00000174899.12	7.5034	1.74031	0.321881	5.4067	6.41972e-08	6.9633e-07	SLC66A1L	transcribed_unitary_pseudogene
ENSG00000174950.11	1.23948	1.56637	0.41378	3.78551	0.000153392	0.00069558	CD164L2	protein_coding
ENSG00000175063.17	754.111	1.56721	0.133684	11.7232	9.69184e-32	2.2616e-29	UBE2C	protein_coding
ENSG00000175147.13	22.9339	1.28592	0.214138	6.00511	1.91204e-09	2.96117e-08	TMEM51-AS1	lncRNA
ENSG00000175170.16	15.966	1.08396	0.150547	7.20018	6.01346e-13	1.89663e-11	FAM182B	lncRNA
ENSG00000175175.6	118.188	1.23076	0.212386	5.79492	6.83554e-09	9.30517e-08	PPM1E	protein_coding
ENSG00000175305.17	75.8829	1.43047	0.119359	11.9846	4.28044e-33	1.08698e-30	CCNE2	protein_coding
ENSG00000175643.10	337.496	1.03799	0.119493	8.68656	3.73587e-18	2.79874e-16	RMI2	protein_coding
ENSG00000175928.6	19.8178	1.67082	0.277326	6.02475	1.6937e-09	2.66244e-08	LRRN1	protein_coding
ENSG00000176040.13	1.57632	1.4335	0.321892	4.45335	8.45393e-06	5.44508e-05	TMPRSS7	protein_coding
ENSG00000176165.12	0.971228	2.51462	0.607392	4.14004	3.47251e-05	0.00018957	FOXG1	protein_coding
ENSG00000176170.14	928.628	1.3486	0.202659	6.65452	2.8423e-11	6.43261e-10	SPHK1	protein_coding
ENSG00000176208.9	145.599	1.18223	0.0809532	14.6039	2.65141e-48	1.99063e-45	ATAD5	protein_coding
ENSG00000176244.7	48.5845	1.21233	0.1263	9.59887	8.08253e-22	9.36705e-20	ACBD7	protein_coding
ENSG00000176597.12	426.154	1.08246	0.171607	6.30776	2.83102e-10	5.21174e-09	B3GNT5	protein_coding
ENSG00000176679.9	0.531086	1.72931	0.740682	2.33476	0.019556	0.0452551	TGIF2LY	protein_coding
ENSG00000176753.5	2.24927	1.82709	0.272284	6.71023	1.94324e-11	4.56232e-10	C15orf56	lncRNA
ENSG00000176890.16	168.245	1.32601	0.103104	12.8609	7.47133e-38	2.36725e-35	TYMS	protein_coding
ENSG00000176979.14	1.065	2.04834	0.701562	2.91969	0.00350381	0.0105859	TRIM60	protein_coding
ENSG00000177108.5	1.14531	1.00227	0.334303	2.99808	0.00271687	0.00849984	ZDHHC22	protein_coding
ENSG00000177359.20	6.10707	1.84941	0.238654	7.74935	9.2362e-15	3.99226e-13	AC024940.1	transcribed_unprocessed_pseudogene
ENSG00000177414.13	11.422	1.24922	0.444176	2.81244	0.00491665	0.0141572	UBE2U	protein_coding
ENSG00000177468.7	2.02734	2.40594	0.74781	3.21731	0.00129399	0.00449951	OLIG3	protein_coding
ENSG00000177504.10	0.620979	1.5255	0.496595	3.07191	0.00212694	0.00689404	VCX2	protein_coding
ENSG00000177519.4	2.07129	1.44871	0.3823	3.78945	0.000150982	0.000686635	RPRM	protein_coding
ENSG00000177551.5	1.25683	1.85201	0.475249	3.89692	9.74221e-05	0.000469256	NHLH2	protein_coding
ENSG00000177602.5	35.5198	1.52816	0.108259	14.1157	3.0377e-45	1.71984e-42	HASPIN	protein_coding
ENSG00000177669.4	22.1443	1.09657	0.231445	4.73792	2.15921e-06	1.6202e-05	MBOAT4	protein_coding
ENSG00000177689.10	0.881092	1.76983	0.511183	3.46223	0.000535729	0.00209582	MAGEB10	protein_coding
ENSG00000177910.8	1.889	2.07786	0.429026	4.84319	1.27769e-06	1.0144e-05	SPATA31C2	transcribed_unprocessed_pseudogene
ENSG00000177984.7	3.31033	1.09449	0.355475	3.07896	0.00207723	0.00675069	LCN15	protein_coding
ENSG00000178233.18	0.879048	1.28327	0.266228	4.8202	1.43413e-06	1.1249e-05	TMEM151B	protein_coding
ENSG00000178235.8	2.76949	3.14399	0.509897	6.16594	7.00635e-10	1.19551e-08	SLITRK1	protein_coding
ENSG00000178248.11	0.557013	1.1113	0.42775	2.59801	0.0093767	0.0244532	FAM230I	lncRNA
ENSG00000178395.7	5.60837	1.99763	0.350965	5.69181	1.25702e-08	1.61445e-07	CCDC185	protein_coding
ENSG00000178462.12	2.72726	2.24279	0.378137	5.93116	3.00809e-09	4.42828e-08	TUBAL3	protein_coding
ENSG00000178473.7	0.630712	1.3101	0.475458	2.75545	0.0058612	0.0164317	UCN3	protein_coding
ENSG00000178828.7	7.9709	1.10705	0.235928	4.69232	2.70129e-06	1.97569e-05	RNF186	protein_coding
ENSG00000178999.13	415.356	1.2706	0.131978	9.62737	6.12789e-22	7.2477e-20	AURKB	protein_coding
ENSG00000179148.10	2.055	1.57427	0.301193	5.22678	1.72484e-07	1.68798e-06	ALOXE3	protein_coding
ENSG00000179178.11	63.2789	1.92143	0.244267	7.86613	3.65768e-15	1.721e-13	TMEM125	protein_coding
ENSG00000179299.17	40.6451	1.11085	0.271673	4.08892	4.33379e-05	0.000230513	NSUN7	protein_coding
ENSG00000179399.15	103.822	1.00992	0.255555	3.95189	7.75369e-05	0.000384246	GPC5	protein_coding
ENSG00000179455.10	53.7375	1.08849	0.252768	4.30629	1.66013e-05	9.90913e-05	MKRN3	protein_coding
ENSG00000179477.11	2.04794	1.26938	0.328389	3.86546	0.00011088	0.000525575	ALOX12B	protein_coding
ENSG00000179674.4	59.8711	1.25643	0.275518	4.56024	5.10952e-06	3.47709e-05	ARL14	protein_coding
ENSG00000179750.16	114.055	1.31978	0.173329	7.61435	2.65027e-14	1.05693e-12	APOBEC3B	protein_coding
ENSG00000179826.7	0.712228	1.35017	0.430482	3.13641	0.00171028	0.00571131	MRGPRX3	protein_coding
ENSG00000180066.10	15.7473	3.19579	0.346067	9.2346	2.59259e-20	2.52219e-18	LINC02870	lncRNA
ENSG00000180178.11	12.4998	1.05993	0.459944	2.30449	0.0211953	0.0484641	FAR2P1	transcribed_unprocessed_pseudogene
ENSG00000180251.5	0.951948	2.18463	0.456956	4.78083	1.74576e-06	1.34071e-05	SLC9A4	protein_coding
ENSG00000180318.4	3.75471	1.59138	0.648887	2.45247	0.0141878	0.0346136	ALX1	protein_coding
ENSG00000180385.8	19.5774	1.19342	0.114043	10.4646	1.25559e-25	1.92724e-23	EMC3-AS1	transcribed_unprocessed_pseudogene
ENSG00000180801.14	123.393	1.17498	0.159212	7.37995	1.58352e-13	5.47982e-12	ARSJ	protein_coding
ENSG00000180861.9	12.0524	2.37639	0.364366	6.52199	6.93802e-11	1.45484e-09	LINC01559	lncRNA
ENSG00000181355.21	3.89939	1.71212	0.46739	3.66315	0.000249134	0.00106796	OFCC1	transcribed_unitary_pseudogene
ENSG00000181408.4	2.4142	1.19387	0.28889	4.13262	3.58656e-05	0.000195095	UTS2R	protein_coding
ENSG00000181418.8	5.96116	1.79479	0.224385	7.99869	1.25748e-15	6.511e-14	DDN	protein_coding
ENSG00000181433.9	3.3619	2.76352	0.547247	5.04986	4.42123e-07	3.93738e-06	SAGE1	protein_coding
ENSG00000181541.6	47.194	1.33566	0.241719	5.52566	3.28246e-08	3.82209e-07	MAB21L2	protein_coding
ENSG00000181544.15	27.9102	1.36711	0.102823	13.2957	2.45055e-40	9.10023e-38	FANCB	protein_coding
ENSG00000181577.16	257.788	2.06322	0.312234	6.60793	3.8974e-11	8.58422e-10	C6orf223	lncRNA
ENSG00000181617.6	78.661	1.4957	0.373145	4.00837	6.11403e-05	0.000311575	FDCSP	protein_coding
ENSG00000181626.12	1.11346	1.34208	0.286798	4.67953	2.87531e-06	2.08705e-05	ANKRD62	protein_coding
ENSG00000181656.7	1990.98	1.6241	0.281361	5.77229	7.82027e-09	1.05131e-07	GPR88	protein_coding
ENSG00000181800.6	4.83783	1.35551	0.338352	4.00623	6.16969e-05	0.000313855	CELF2-AS1	lncRNA
ENSG00000182010.11	81.5753	1.62427	0.145111	11.1933	4.39789e-29	8.48523e-27	RTKN2	protein_coding
ENSG00000182040.9	4.59983	2.11385	0.332873	6.35034	2.1484e-10	4.07553e-09	USH1G	protein_coding
ENSG00000182070.6	0.580932	1.50753	0.366141	4.11735	3.8325e-05	0.000206876	OR52A1	protein_coding
ENSG00000182077.12	5.50565	1.71671	0.433194	3.96291	7.40408e-05	0.000368507	PTCHD3	polymorphic_pseudogene
ENSG00000182183.15	35.4699	1.31386	0.205904	6.38091	1.76037e-10	3.40022e-09	SHISAL2A	protein_coding
ENSG00000182230.12	0.626578	1.67863	0.365607	4.59136	4.40368e-06	3.05025e-05	FAM153B	protein_coding
ENSG00000182272.12	154.853	1.39016	0.314291	4.42316	9.72663e-06	6.17952e-05	B4GALNT4	protein_coding
ENSG00000182366.10	9.45023	1.58139	0.228443	6.92248	4.43816e-12	1.16826e-10	FAM87A	lncRNA
ENSG00000182583.12	14.7224	1.37717	0.372496	3.69715	0.000218035	0.000950526	VCX	protein_coding
ENSG00000182632.15	0.989017	2.03025	0.478617	4.24191	2.2163e-05	0.000127528	CCNYL2	transcribed_unprocessed_pseudogene
ENSG00000182795.13	256.862	1.65015	0.23808	6.9311	4.17572e-12	1.10933e-10	C1orf116	protein_coding
ENSG00000182798.10	48.6422	1.37009	0.335182	4.0876	4.35865e-05	0.000231553	MAGEB17	protein_coding
ENSG00000183072.10	2.46795	1.05017	0.446213	2.35351	0.0185971	0.0434407	NKX2-5	protein_coding
ENSG00000183091.19	975.216	1.51146	0.196265	7.70111	1.3489e-14	5.6536e-13	NEB	protein_coding
ENSG00000183128.7	0.758585	1.16073	0.343372	3.38039	0.000723825	0.0027225	CALHM3	protein_coding
ENSG00000183134.5	140.363	1.03771	0.170908	6.07171	1.26557e-09	2.05008e-08	PTGDR2	protein_coding
ENSG00000183145.9	35.0889	2.26538	0.198599	11.4068	3.8684e-30	8.14629e-28	RIPPLY3	protein_coding
ENSG00000183206.17	0.485186	1.46002	0.551408	2.6478	0.0081018	0.0215981	POTEC	protein_coding
ENSG00000183251.4	0.876504	1.35136	0.535457	2.52376	0.0116108	0.029263	OR51B4	protein_coding
ENSG00000183317.17	59.8344	1.39649	0.274888	5.08022	3.77007e-07	3.41472e-06	EPHA10	protein_coding
ENSG00000183324.11	1.49181	1.43952	0.272352	5.28552	1.25345e-07	1.2654e-06	REC114	protein_coding
ENSG00000183476.12	1.68605	1.44541	0.228243	6.33277	2.40806e-10	4.52227e-09	SH2D7	protein_coding
ENSG00000183566.10	0.773153	1.14198	0.496057	2.30211	0.0213289	0.0487407	BPIFA4P	transcribed_unprocessed_pseudogene
ENSG00000183690.13	10.0787	2.19474	0.270177	8.12334	4.53529e-16	2.51011e-14	EFHC2	protein_coding
ENSG00000183760.11	2.20038	1.321	0.241774	5.46376	4.66156e-08	5.23891e-07	ACP7	protein_coding
ENSG00000183778.17	23.7373	1.70163	0.292442	5.81869	5.93111e-09	8.16083e-08	B3GALT5	protein_coding
ENSG00000183783.7	1.54298	1.71452	0.430203	3.98537	6.73743e-05	0.000339486	KCTD8	protein_coding
ENSG00000183850.14	6.7851	2.13522	0.246511	8.66173	4.64665e-18	3.42168e-16	ZNF730	protein_coding
ENSG00000183876.9	51.6591	1.00653	0.178382	5.64253	1.67565e-08	2.08686e-07	ARSI	protein_coding
ENSG00000183929.7	5.9313	1.55537	0.275666	5.64224	1.67853e-08	2.089e-07	DUSP5P1	processed_pseudogene
ENSG00000184032.3	0.836532	2.00184	0.708514	2.82541	0.00472207	0.013681	KRTAP20-2	protein_coding
ENSG00000184139.8	2.90026	1.11113	0.348989	3.18386	0.00145326	0.00497423	RPL7AP28	processed_pseudogene
ENSG00000184349.13	147.779	1.57844	0.254409	6.20435	5.49249e-10	9.6045e-09	EFNA5	protein_coding
ENSG00000184351.8	0.723188	1.92339	0.622012	3.0922	0.00198676	0.0064952	KRTAP19-1	protein_coding
ENSG00000184357.5	4.05258	1.14279	0.189556	6.02876	1.65226e-09	2.60322e-08	H1-5	protein_coding
ENSG00000184363.10	80.7226	1.08046	0.275969	3.91516	9.03433e-05	0.000439388	PKP3	protein_coding
ENSG00000184368.16	154.521	1.13132	0.27305	4.14329	3.4236e-05	0.000187322	MAP7D2	protein_coding
ENSG00000184434.8	25.1149	1.37007	0.23244	5.89431	3.76259e-09	5.41888e-08	LRRC19	protein_coding
ENSG00000184445.12	601.773	1.37055	0.0917845	14.9323	2.03206e-50	2.00512e-47	KNTC1	protein_coding
ENSG00000184502.4	8.07878	2.16605	0.511962	4.23089	2.32768e-05	0.000133271	GAST	protein_coding
ENSG00000184611.12	8.3898	1.28642	0.282521	4.55336	5.27967e-06	3.58441e-05	KCNH7	protein_coding
ENSG00000184635.16	75.7916	1.51775	0.133591	11.3612	6.52389e-30	1.35728e-27	ZNF93	protein_coding
ENSG00000184661.14	117.968	1.59295	0.123494	12.899	4.55991e-38	1.45816e-35	CDCA2	protein_coding
ENSG00000184788.14	1.24481	1.4125	0.306355	4.61068	4.01353e-06	2.81102e-05	SATL1	protein_coding
ENSG00000184949.16	19.8779	1.1369	0.177451	6.40684	1.48567e-10	2.92194e-09	FAM227A	protein_coding
ENSG00000184956.16	337.026	1.27695	0.322947	3.95405	7.68381e-05	0.000381111	MUC6	protein_coding
ENSG00000185002.10	8.96495	1.17034	0.34379	3.40422	0.000663531	0.00252043	RFX6	protein_coding
ENSG00000185101.13	237.674	1.50431	0.184619	8.14819	3.69407e-16	2.08122e-14	ANO9	protein_coding
ENSG00000185105.5	1.90457	1.07966	0.226095	4.77526	1.79475e-06	1.37436e-05	MYADML2	protein_coding
ENSG00000185156.6	4.74584	1.22778	0.252955	4.85376	1.2114e-06	9.67103e-06	MFSD6L	protein_coding
ENSG00000185247.15	17.4831	2.68067	0.55383	4.84023	1.29689e-06	1.02846e-05	MAGEA11	protein_coding
ENSG00000185272.14	2.64621	1.03253	0.273533	3.77479	0.000160142	0.000722585	RBM11	protein_coding
ENSG00000185306.13	27.9262	1.08853	0.355732	3.05999	0.00221346	0.00713364	C12orf56	protein_coding
ENSG00000185480.12	96.8039	1.41631	0.0967927	14.6324	1.74572e-48	1.43548e-45	PARPBP	protein_coding
ENSG00000185499.16	166.678	1.81779	0.205108	8.86258	7.81847e-19	6.45978e-17	MUC1	protein_coding
ENSG00000185559.16	2463.68	1.97726	0.486453	4.06464	4.81063e-05	0.000252377	DLK1	protein_coding
ENSG00000185594.7	0.705563	1.33104	0.479045	2.77852	0.00546069	0.0154646	SPATA8	lncRNA
ENSG00000185615.16	82.7796	1.90251	0.269865	7.04986	1.79095e-12	5.18894e-11	PDIA2	protein_coding
ENSG00000185686.18	472.17	1.75022	0.405235	4.31904	1.56712e-05	9.42236e-05	PRAME	protein_coding
ENSG00000185737.13	22.9799	1.53301	0.265848	5.76648	8.09456e-09	1.08354e-07	NRG3	protein_coding
ENSG00000186007.10	0.995287	1.23977	0.484576	2.55846	0.0105137	0.0269043	LEMD1	protein_coding
ENSG00000186086.18	0.591097	1.40035	0.540934	2.58877	0.00963208	0.025004	NBPF6	protein_coding
ENSG00000186185.14	302.853	1.91944	0.116305	16.5035	3.46118e-61	9.96127e-58	KIF18B	protein_coding
ENSG00000186193.9	96.9458	1.70942	0.150489	11.3591	6.68262e-30	1.38198e-27	SAPCD2	protein_coding
ENSG00000186281.12	66.5572	1.02618	0.168384	6.0943	1.09917e-09	1.79909e-08	GPAT2	protein_coding
ENSG00000186297.12	3.13091	2.1785	0.552492	3.94304	8.04557e-05	0.000396605	GABRA5	protein_coding
ENSG00000186417.14	230.229	1.04916	0.238787	4.3937	1.11436e-05	6.94683e-05	GLDN	protein_coding
ENSG00000186638.16	110.253	1.22678	0.0963816	12.7284	4.11103e-37	1.27909e-34	KIF24	protein_coding
ENSG00000186871.7	74.3611	1.54566	0.111649	13.8439	1.38443e-43	6.37501e-41	ERCC6L	protein_coding
ENSG00000186897.5	21.4253	1.82722	0.2553	7.15714	8.23747e-13	2.54008e-11	C1QL4	protein_coding
ENSG00000186912.6	2.32353	1.69694	0.287477	5.90289	3.57178e-09	5.17025e-08	P2RY4	protein_coding
ENSG00000186977.3	1.41026	2.93131	0.678835	4.31815	1.57343e-05	9.457e-05	KRTAP19-5	protein_coding
ENSG00000187021.15	0.883982	1.09057	0.455801	2.39265	0.0167272	0.0397694	PNLIPRP1	protein_coding
ENSG00000187123.15	46.4	1.91919	0.223765	8.57683	9.75262e-18	6.91615e-16	LYPD6	protein_coding
ENSG00000187172.15	19.3524	1.6027	0.440081	3.64182	0.000270721	0.00115001	BAGE2	transcribed_unprocessed_pseudogene
ENSG00000187210.14	135.812	1.42448	0.150449	9.46819	2.84744e-21	3.16203e-19	GCNT1	protein_coding
ENSG00000187242.6	12.786	1.96064	0.426022	4.60221	4.18029e-06	2.91363e-05	KRT12	protein_coding
ENSG00000187416.12	5.2481	2.21465	0.353608	6.263	3.77648e-10	6.80358e-09	LHFPL3	protein_coding
ENSG00000187483.10	1.43107	1.21551	0.311661	3.90009	9.61552e-05	0.00046406	SERPINA13P	transcribed_unprocessed_pseudogene
ENSG00000187595.16	65.2655	1.04078	0.155985	6.67232	2.51795e-11	5.77808e-10	ZNF385C	protein_coding
ENSG00000187621.15	17.5398	1.24927	0.271808	4.59617	4.30323e-06	2.98727e-05	TCL6	lncRNA
ENSG00000187672.14	11.3346	1.09654	0.26126	4.19712	2.70325e-05	0.000151484	ERC2	protein_coding
ENSG00000187689.10	0.480519	1.58922	0.638498	2.48901	0.0128101	0.0318142	AMTN	protein_coding
ENSG00000187690.4	7.24812	2.69609	0.475309	5.67228	1.40906e-08	1.78909e-07	EZHIP	protein_coding
ENSG00000187715.13	4.71892	1.66981	0.318056	5.25005	1.52059e-07	1.50819e-06	KBTBD12	protein_coding
ENSG00000187772.8	124.982	2.03343	0.538982	3.77272	0.000161477	0.00072747	LIN28B	protein_coding
ENSG00000187783.12	29.898	1.75669	0.259458	6.7706	1.28247e-11	3.11035e-10	TMEM72	protein_coding
ENSG00000187908.20	47.606	3.15456	0.298289	10.5755	3.86958e-26	6.24485e-24	DMBT1	protein_coding
ENSG00000187951.11	60.1484	1.50237	0.106222	14.1437	2.04335e-45	1.17615e-42	AC091057.1	lncRNA
ENSG00000187959.9	5.05436	1.10165	0.195021	5.64887	1.6151e-08	2.02025e-07	CPSF4L	protein_coding
ENSG00000187987.9	2.99897	1.05581	0.275037	3.83879	0.000123644	0.000578089	ZSCAN23	protein_coding
ENSG00000188064.10	42.8642	2.61237	0.305938	8.53889	1.35519e-17	9.37931e-16	WNT7B	protein_coding
ENSG00000188112.9	184.375	1.71394	0.245676	6.97641	3.02814e-12	8.27373e-11	C6orf132	protein_coding
ENSG00000188175.10	2.58206	1.39902	0.276344	5.06262	4.13529e-07	3.70759e-06	HEPACAM2	protein_coding
ENSG00000188211.9	42.3133	1.13108	0.20065	5.63709	1.72945e-08	2.14465e-07	NCR3LG1	protein_coding
ENSG00000188322.8	79.5486	1.45296	0.159494	9.10977	8.25562e-20	7.58288e-18	SBK1	protein_coding
ENSG00000188389.11	121.038	1.00354	0.209942	4.7801	1.75206e-06	1.34524e-05	PDCD1	protein_coding
ENSG00000188501.11	5.8015	1.03823	0.140151	7.40795	1.28271e-13	4.53155e-12	LCTL	protein_coding
ENSG00000188505.5	9.75431	1.05272	0.211413	4.97943	6.37711e-07	5.46637e-06	NCCRP1	protein_coding
ENSG00000188512.6	1.73509	1.02028	0.228549	4.46415	8.03889e-06	5.21811e-05	AF279873.1	processed_pseudogene
ENSG00000188610.12	21.9041	1.7481	0.116699	14.9795	9.99035e-51	1.04554e-47	FAM72B	protein_coding
ENSG00000188620.11	6.48022	2.35723	0.381964	6.17133	6.77198e-10	1.16126e-08	HMX3	protein_coding
ENSG00000188662.6	1.23803	1.83345	0.391344	4.68501	2.79945e-06	2.03884e-05	H1-9P	transcribed_unitary_pseudogene
ENSG00000188816.3	1.46554	2.50124	0.52233	4.78863	1.67924e-06	1.29625e-05	HMX2	protein_coding
ENSG00000188910.8	37.5269	1.31619	0.250165	5.26128	1.43055e-07	1.42666e-06	GJB3	protein_coding
ENSG00000189057.11	357.98	1.23743	0.11565	10.6997	1.02057e-26	1.69453e-24	FAM111B	protein_coding
ENSG00000189127.8	3.87783	1.32145	0.359971	3.671	0.000241605	0.00103989	ANKRD34B	protein_coding
ENSG00000189212.12	2.3255	1.26448	0.273239	4.62773	3.69691e-06	2.60777e-05	DPY19L2P1	transcribed_unprocessed_pseudogene
ENSG00000189229.11	17.4096	1.57591	0.330497	4.76831	1.85776e-06	1.41758e-05	AC069277.1	lncRNA
ENSG00000196081.10	10.7362	1.29378	0.12301	10.5177	7.16309e-26	1.14002e-23	ZNF724	protein_coding
ENSG00000196104.11	31.9749	2.76073	0.424284	6.5068	7.67695e-11	1.59334e-09	SPOCK3	protein_coding
ENSG00000196155.13	144.132	1.4432	0.187776	7.68573	1.52129e-14	6.29967e-13	PLEKHG4	protein_coding
ENSG00000196172.9	80.7015	1.20108	0.158033	7.60023	2.95614e-14	1.17349e-12	ZNF681	protein_coding
ENSG00000196188.12	71.8389	2.31004	0.30103	7.6738	1.66978e-14	6.857e-13	CTSE	protein_coding
ENSG00000196247.11	168.394	1.14236	0.092097	12.4039	2.49049e-35	7.10838e-33	ZNF107	protein_coding
ENSG00000196289.7	1.61817	1.2582	0.318649	3.94855	7.8626e-05	0.000388793	BECN2	protein_coding
ENSG00000196335.13	17.2718	1.04757	0.199514	5.25061	1.516e-07	1.50407e-06	STK31	protein_coding
ENSG00000196341.3	1.56616	1.34777	0.469906	2.86817	0.00412848	0.0121958	OR8D1	protein_coding
ENSG00000196350.9	2.88768	2.47194	0.489126	5.05378	4.33146e-07	3.86339e-06	ZNF729	protein_coding
ENSG00000196353.11	4.50309	1.3502	0.279211	4.83578	1.32623e-06	1.0486e-05	CPNE4	protein_coding
ENSG00000196368.5	7.584	1.23226	0.237496	5.18855	2.11933e-07	2.03938e-06	NUDT11	protein_coding
ENSG00000196427.13	1.19489	1.4465	0.440606	3.28298	0.00102716	0.00368218	NBPF4	protein_coding
ENSG00000196542.8	48.6045	1.321	0.246152	5.36662	8.02263e-08	8.50689e-07	SPTSSB	protein_coding
ENSG00000196550.10	22.8346	1.60811	0.112037	14.3534	1.01509e-46	6.87398e-44	FAM72A	protein_coding
ENSG00000196584.3	117.79	1.61573	0.101989	15.8421	1.59418e-56	2.75283e-53	XRCC2	protein_coding
ENSG00000196593.9	3.16086	2.32653	0.456223	5.09955	3.40453e-07	3.10973e-06	ANKRD20A19P	transcribed_unprocessed_pseudogene
ENSG00000196611.5	76.6646	1.4709	0.212276	6.92916	4.23337e-12	1.12378e-10	MMP1	protein_coding
ENSG00000196748.10	1.89121	1.14629	0.39969	2.86796	0.00413132	0.0122031	CLPSL2	protein_coding
ENSG00000196859.8	5.9709	1.03043	0.264654	3.89349	9.88127e-05	0.000475093	KRT39	protein_coding
ENSG00000196917.6	9.54412	1.02118	0.201167	5.07628	3.84894e-07	3.47886e-06	HCAR1	protein_coding
ENSG00000197085.11	55.3051	1.17864	0.301836	3.9049	9.42639e-05	0.00045608	NPSR1-AS1	lncRNA
ENSG00000197123.9	2.09429	1.65877	0.617248	2.68737	0.00720164	0.0195531	ZNF679	protein_coding
ENSG00000197134.13	39.2077	1.29712	0.184354	7.036	1.97831e-12	5.64653e-11	ZNF257	protein_coding
ENSG00000197261.11	97.8786	1.80643	0.23702	7.62142	2.509e-14	1.00523e-12	C6orf141	protein_coding
ENSG00000197273.4	30.4514	1.20767	0.327172	3.69124	0.000223164	0.000969945	GUCA2A	protein_coding
ENSG00000197299.12	117.742	1.44754	0.116209	12.4564	1.29131e-35	3.74762e-33	BLM	protein_coding
ENSG00000197301.7	1.5591	1.3763	0.300783	4.57573	4.74571e-06	3.26035e-05	HMGA2-AS1	lncRNA
ENSG00000197360.9	6.67862	1.79321	0.347344	5.16263	2.43507e-07	2.30783e-06	ZNF98	protein_coding
ENSG00000197385.6	7.2478	1.27994	0.22158	5.77641	7.63103e-09	1.0304e-07	ZNF860	protein_coding
ENSG00000197410.14	9.08661	1.56074	0.267448	5.83568	5.35712e-09	7.4243e-08	DCHS2	protein_coding
ENSG00000197415.12	100.933	2.09343	0.246283	8.50013	1.89375e-17	1.28492e-15	VEPH1	protein_coding
ENSG00000197472.15	8.61171	2.50807	0.269433	9.30872	1.29378e-20	1.33379e-18	ZNF695	protein_coding
ENSG00000197506.8	19.0118	1.34618	0.29317	4.59182	4.39401e-06	3.04538e-05	SLC28A3	protein_coding
ENSG00000197587.11	15.1462	2.10706	0.316754	6.65203	2.89077e-11	6.53375e-10	DMBX1	protein_coding
ENSG00000197617.9	0.562418	1.23759	0.364204	3.39807	0.000678634	0.00257129	VN1R5	polymorphic_pseudogene
ENSG00000197721.17	3.21623	1.34905	0.24872	5.42395	5.82971e-08	6.39361e-07	CR1L	protein_coding
ENSG00000197927.13	7.75888	1.02003	0.159941	6.37752	1.79979e-10	3.46861e-09	NBEAP2	transcribed_unprocessed_pseudogene
ENSG00000197993.9	48.5407	1.24884	0.222353	5.61646	1.94906e-08	2.39037e-07	KEL	protein_coding
ENSG00000198028.4	7.52437	2.49052	0.472617	5.26964	1.36688e-07	1.3695e-06	ZNF560	protein_coding
ENSG00000198033.12	101.461	3.51453	0.493725	7.1184	1.09185e-12	3.28468e-11	TUBA3C	protein_coding
ENSG00000198049.7	1.36058	1.4772	0.297334	4.96814	6.75988e-07	5.76585e-06	AVPR1B	protein_coding
ENSG00000198054.12	30.0123	1.36775	0.515406	2.65374	0.0079605	0.0212674	DSCR8	lncRNA
ENSG00000198075.10	219.004	1.26412	0.173512	7.28552	3.2043e-13	1.05696e-11	SULT1C4	protein_coding
ENSG00000198153.8	0.692534	1.92873	0.385802	4.99928	5.75457e-07	4.9822e-06	ZNF849P	unprocessed_pseudogene
ENSG00000198183.12	3.902	2.11399	0.569319	3.71319	0.00020466	0.000897088	BPIFA1	protein_coding
ENSG00000198354.7	2.1859	1.35009	0.378889	3.5633	0.00036622	0.00150086	DCAF12L2	protein_coding
ENSG00000198398.2	0.826288	1.66718	0.546492	3.0507	0.00228311	0.00732297	TMEM207	protein_coding
ENSG00000198443.6	0.73214	1.36415	0.536729	2.54159	0.0110348	0.0280282	KRTAP4-1	protein_coding
ENSG00000198521.12	192.557	1.10236	0.138389	7.96563	1.64388e-15	8.21607e-14	ZNF43	protein_coding
ENSG00000198554.12	208.599	1.34547	0.0863521	15.5813	9.76027e-55	1.46557e-51	WDHD1	protein_coding
ENSG00000198569.10	6.46402	1.04732	0.192341	5.44514	5.17644e-08	5.75946e-07	SLC34A3	protein_coding
ENSG00000198633.10	6.53935	2.22638	0.304176	7.31938	2.4912e-13	8.36115e-12	ZNF534	protein_coding
ENSG00000198729.5	8.51321	1.27611	0.2552	5.00044	5.72009e-07	4.95732e-06	PPP1R14C	protein_coding
ENSG00000198753.12	125.203	1.55881	0.215366	7.23792	4.55602e-13	1.46642e-11	PLXNB3	protein_coding
ENSG00000198774.5	140.208	1.47938	0.216863	6.82174	8.99434e-12	2.22513e-10	RASSF9	protein_coding
ENSG00000198788.9	6.57434	1.93844	0.360692	5.37422	7.69158e-08	8.1835e-07	MUC2	protein_coding
ENSG00000198822.10	2.96547	1.28877	0.337707	3.81624	0.000135501	0.000625705	GRM3	protein_coding
ENSG00000198826.11	310.006	1.5263	0.0912351	16.7293	8.02151e-63	3.95759e-59	ARHGAP11A	protein_coding
ENSG00000198901.14	5.8991	1.00486	0.13249	7.58441	3.34005e-14	1.31082e-12	PRC1	protein_coding
ENSG00000198915.12	99.692	1.55533	0.222766	6.98191	2.91185e-12	7.97491e-11	RASGEF1A	protein_coding
ENSG00000198976.1	0.884661	1.0892	0.396704	2.74562	0.00603968	0.0168541	MIR429	miRNA
ENSG00000201700.3	0.658879	1.76665	0.587501	3.00706	0.00263791	0.00828432	SNORD113-3	snoRNA
ENSG00000203523.3	0.71666	1.42028	0.346392	4.10022	4.1275e-05	0.000220627	TAS2R2P	processed_pseudogene
ENSG00000203585.4	1.19153	1.31624	0.306567	4.29347	1.75906e-05	0.000104222	LINC02408	lncRNA
ENSG00000203645.2	4.39396	1.39076	0.287144	4.84341	1.27629e-06	1.01362e-05	LINC00501	lncRNA
ENSG00000203690.13	7.57078	1.40221	0.330595	4.24147	2.22062e-05	0.000127734	TCP10L3	transcribed_unprocessed_pseudogene
ENSG00000203740.4	4.05578	1.46222	0.351039	4.16542	3.10786e-05	0.000171349	METTL11B	protein_coding
ENSG00000203786.6	0.700014	1.53169	0.541416	2.82904	0.00466884	0.0135487	KPRP	protein_coding
ENSG00000203930.12	15.5242	1.3427	0.272947	4.91929	8.68596e-07	7.18511e-06	LINC00632	lncRNA
ENSG00000203989.5	2.6192	3.11578	0.70046	4.44819	8.65988e-06	5.56217e-05	RHOXF2B	protein_coding
ENSG00000204019.5	6.4339	2.40653	0.623969	3.85682	0.000114872	0.000542044	CT83	protein_coding
ENSG00000204065.3	1.29186	2.57954	0.464805	5.54972	2.86128e-08	3.37145e-07	TCEAL5	protein_coding
ENSG00000204091.8	1.26803	1.0337	0.394125	2.62276	0.00872205	0.0229837	TDRG1	lncRNA
ENSG00000204118.2	14.2393	1.32126	0.369684	3.57402	0.000351544	0.00144862	NAP1L6P	transcribed_processed_pseudogene
ENSG00000204140.10	0.630473	1.72559	0.629763	2.74006	0.00614279	0.0171004	CLPSL1	protein_coding
ENSG00000204175.5	15.2894	2.0709	0.351435	5.89272	3.799e-09	5.46677e-08	GPRIN2	protein_coding
ENSG00000204179.10	28.8386	1.00193	0.263949	3.79592	0.000147096	0.00067144	PTPN20	protein_coding
ENSG00000204248.11	59.3589	1.01677	0.167717	6.0624	1.34108e-09	2.15843e-08	COL11A2	protein_coding
ENSG00000204379.11	0.960297	1.47287	0.469915	3.13433	0.0017225	0.0057465	XAGE1A	protein_coding
ENSG00000204382.11	1.63625	1.71072	0.463048	3.69447	0.000220349	0.000959282	XAGE1B	protein_coding
ENSG00000204385.13	74.809	1.38078	0.178752	7.72458	1.12221e-14	4.78477e-13	SLC44A4	protein_coding
ENSG00000204421.3	1.15675	1.0155	0.282546	3.59411	0.000325507	0.00135198	LY6G6C	protein_coding
ENSG00000204429.4	1.27359	1.33486	0.253741	5.26072	1.43491e-07	1.4306e-06	AL451142.1	processed_pseudogene
ENSG00000204434.6	3.78172	1.21696	0.247918	4.90873	9.1669e-07	7.53602e-06	POTEKP	unprocessed_pseudogene
ENSG00000204460.3	1.70983	2.99742	0.558925	5.36282	8.19307e-08	8.67165e-07	LINC01854	lncRNA
ENSG00000204580.13	1922.16	1.01211	0.170066	5.95128	2.66058e-09	3.98302e-08	DDR1	protein_coding
ENSG00000204618.8	31.5202	1.14798	0.148839	7.7129	1.22992e-14	5.20545e-13	RNF39	protein_coding
ENSG00000204624.8	7.82828	1.14422	0.226646	5.04846	4.45383e-07	3.96277e-06	DISP3	protein_coding
ENSG00000204648.11	1.05037	1.8911	0.716846	2.63809	0.0083375	0.0221223	SSX9P	transcribed_unprocessed_pseudogene
ENSG00000204657.4	1.10143	1.8285	0.348883	5.24101	1.597e-07	1.57448e-06	OR2H2	protein_coding
ENSG00000204688.9	1.41855	1.80215	0.465367	3.87252	0.000107714	0.000512421	OR2H1	protein_coding
ENSG00000204695.4	1.382	1.84116	0.457308	4.02608	5.67151e-05	0.000291649	OR14J1	protein_coding
ENSG00000204740.11	7.56774	1.139	0.249779	4.56005	5.11419e-06	3.4789e-05	MALRD1	protein_coding
ENSG00000204789.4	81.1286	1.26373	0.204248	6.18723	6.12295e-10	1.05763e-08	ZNF204P	processed_pseudogene
ENSG00000204963.6	6.06156	1.01301	0.23871	4.2437	2.19862e-05	0.000126595	PCDHA7	protein_coding
ENSG00000204965.9	3.45311	1.05828	0.27924	3.78986	0.00015073	0.000685763	PCDHA5	protein_coding
ENSG00000204967.12	6.01257	1.07043	0.238123	4.49528	6.94769e-06	4.58787e-05	PCDHA4	protein_coding
ENSG00000204969.7	3.48061	2.13654	0.334134	6.39427	1.61316e-10	3.14402e-09	PCDHA2	protein_coding
ENSG00000204983.14	8.45229	2.14961	0.489895	4.3879	1.14451e-05	7.1117e-05	PRSS1	protein_coding
ENSG00000204993.3	0.602423	1.25491	0.422094	2.97306	0.00294843	0.00911694	CRTC1P1	processed_pseudogene
ENSG00000205054.8	2.1227	1.02051	0.268834	3.79606	0.000147016	0.000671409	LINC01121	lncRNA
ENSG00000205057.6	2.26022	1.48489	0.404845	3.6678	0.000244645	0.00105127	CLLU1-AS1	lncRNA
ENSG00000205212.5	4.52091	2.36524	0.456547	5.18072	2.21029e-07	2.11629e-06	CCDC144NL	transcribed_unprocessed_pseudogene
ENSG00000205274.3	0.375719	1.4134	0.476334	2.96724	0.00300483	0.00927058	TRBV20OR9-2	TR_V_gene
ENSG00000205359.10	13.6445	1.21403	0.446171	2.72099	0.00650861	0.0179495	SLCO6A1	protein_coding
ENSG00000205396.11	4.20169	1.32671	0.346058	3.83379	0.000126185	0.000588175	LINC00661	lncRNA
ENSG00000205456.11	1.06627	1.05758	0.339761	3.1127	0.00185381	0.0061196	TP53TG3D	protein_coding
ENSG00000205634.7	2.13477	1.06448	0.43212	2.4634	0.0137626	0.0337575	LINC00898	lncRNA
ENSG00000205678.8	4.93211	1.56412	0.54796	2.85444	0.00431129	0.0126557	TECRL	protein_coding
ENSG00000205704.7	5.58469	1.37909	0.187873	7.34054	2.12741e-13	7.20314e-12	LINC00634	protein_coding
ENSG00000205740.2	8.27471	1.00616	0.130477	7.71141	1.24432e-14	5.25997e-13	AL359878.1	lncRNA
ENSG00000205846.4	0.889047	1.01818	0.335479	3.03499	0.00240541	0.00764807	CLEC6A	protein_coding
ENSG00000205890.3	2.75283	1.60206	0.402459	3.98067	6.87206e-05	0.000345062	AC108134.1	lncRNA
ENSG00000206073.11	2.72807	2.30312	0.601751	3.82736	0.000129523	0.000601399	SERPINB4	protein_coding
ENSG00000206105.2	1.34773	2.62325	0.71215	3.68356	0.000230001	0.000994405	KRTAP20-4	protein_coding
ENSG00000206120.11	10.8788	1.01162	0.29992	3.37297	0.000743625	0.00278484	EGFEM1P	transcribed_unitary_pseudogene
ENSG00000206262.9	1.20714	1.95586	0.375282	5.21172	1.87093e-07	1.82115e-06	FOXL2NB	protein_coding
ENSG00000206531.10	0.59536	1.08434	0.315605	3.43575	0.000590912	0.0022779	CD200R1L	protein_coding
ENSG00000206579.9	3.05773	1.01064	0.316334	3.19486	0.00139897	0.00481705	XKR4	protein_coding
ENSG00000206647.1	0.903737	1.16466	0.257581	4.52153	6.1394e-06	4.10593e-05	AC007240.1	snoRNA
ENSG00000206878.1	2.03201	1.79952	0.320608	5.61284	1.99027e-08	2.43313e-07	AL713899.1	snoRNA
ENSG00000211598.2	643.197	1.09505	0.281166	3.89467	9.83344e-05	0.000473123	IGKV4-1	IG_V_gene
ENSG00000211648.2	183.209	1.38697	0.281918	4.91976	8.6651e-07	7.17268e-06	IGLV1-47	IG_V_gene
ENSG00000211651.3	275.882	1.09771	0.28507	3.85065	0.000117805	0.000553913	IGLV1-44	IG_V_gene
ENSG00000211663.2	275.538	1.01227	0.285973	3.53973	0.000400537	0.00162454	IGLV3-19	IG_V_gene
ENSG00000211664.3	14.4723	1.06927	0.300906	3.55351	0.000380127	0.00155123	IGLV2-18	IG_V_gene
ENSG00000211669.3	70.4453	1.40715	0.307898	4.57017	4.87339e-06	3.33929e-05	IGLV3-10	IG_V_gene
ENSG00000211710.3	3.95562	1.04955	0.245092	4.28225	1.85009e-05	0.000108917	TRBV4-1	TR_V_gene
ENSG00000211935.3	96.5298	1.25008	0.306209	4.08245	4.45633e-05	0.000235871	IGHV1-3	IG_V_gene
ENSG00000211962.2	107.235	1.25125	0.298857	4.18678	2.82943e-05	0.000157889	IGHV1-46	IG_V_gene
ENSG00000211965.4	60.7174	1.44993	0.292551	4.95617	7.18969e-07	6.08139e-06	IGHV3-49	IG_V_gene
ENSG00000211968.3	9.61182	1.46827	0.363212	4.04245	5.28952e-05	0.0002741	IGHV1-58	IG_V_gene
ENSG00000211970.3	12.6358	1.00184	0.323044	3.10124	0.00192712	0.00632954	IGHV4-61	IG_V_gene
ENSG00000211972.2	18.267	1.12007	0.329118	3.40324	0.000665911	0.00252835	IGHV3-66	IG_V_gene
ENSG00000211976.2	36.9081	1.0431	0.329235	3.16824	0.00153363	0.00521158	IGHV3-73	IG_V_gene
ENSG00000212237.1	1.52754	1.41167	0.326163	4.32813	1.50384e-05	9.08349e-05	RNA5SP18	rRNA_pseudogene
ENSG00000213033.4	0.57235	1.21483	0.29173	4.16421	3.12427e-05	0.000172199	AURKAP1	transcribed_processed_pseudogene
ENSG00000213115.2	0.993075	1.8471	0.799161	2.3113	0.0208166	0.0477371	AC104131.1	processed_pseudogene
ENSG00000213186.8	96.9342	1.25861	0.103799	12.1254	7.7455e-34	2.08983e-31	TRIM59	protein_coding
ENSG00000213190.4	180.193	1.16257	0.172054	6.75701	1.40864e-11	3.39017e-10	MLLT11	protein_coding
ENSG00000213222.3	14.7054	1.10887	0.13125	8.44848	2.95117e-17	1.9714e-15	TOMM40P4	processed_pseudogene
ENSG00000213225.7	20.8853	1.36491	0.225534	6.05193	1.43117e-09	2.29147e-08	NOC2LP1	transcribed_processed_pseudogene
ENSG00000213232.2	1.08666	2.35095	0.642659	3.65817	0.000254026	0.00108698	PPP1R2P10	processed_pseudogene
ENSG00000213420.8	18.2194	1.07996	0.13974	7.72837	1.08934e-14	4.65611e-13	GPC2	protein_coding
ENSG00000213973.9	31.9416	1.14012	0.282914	4.02992	5.57964e-05	0.000287352	ZNF99	protein_coding
ENSG00000213976.4	5.9286	1.16583	0.16808	6.93616	4.02914e-12	1.07452e-10	AC010615.1	unprocessed_pseudogene
ENSG00000213988.11	18.4797	2.27643	0.194373	11.7117	1.11029e-31	2.57349e-29	ZNF90	protein_coding
ENSG00000213997.3	1.51839	1.02789	0.208643	4.92654	8.36995e-07	6.96373e-06	PGAM1P7	processed_pseudogene
ENSG00000214003.2	1.57457	1.6047	0.407833	3.9347	8.33022e-05	0.000409119	ATP5PBP3	processed_pseudogene
ENSG00000214018.3	0.771363	1.62322	0.311721	5.20728	1.91625e-07	1.86317e-06	RRM2P3	processed_pseudogene
ENSG00000214049.8	21.1755	1.26108	0.298757	4.2211	2.43117e-05	0.000138461	UCA1	lncRNA
ENSG00000214107.8	14.8054	1.65457	0.604244	2.73825	0.00617676	0.0171853	MAGEB1	protein_coding
ENSG00000214290.8	110.866	1.20324	0.159684	7.53509	4.88005e-14	1.85206e-12	COLCA2	protein_coding
ENSG00000214402.7	11.5801	1.42556	0.297102	4.79821	1.60088e-06	1.24131e-05	LCNL1	protein_coding
ENSG00000214425.8	22.2234	1.23429	0.170519	7.23841	4.53966e-13	1.46388e-11	LRRC37A4P	transcribed_unprocessed_pseudogene
ENSG00000214429.3	4.8183	1.18917	0.340058	3.49696	0.000470586	0.00187022	CYCSP6	processed_pseudogene
ENSG00000214433.4	1.53835	1.39913	0.236245	5.92236	3.17358e-09	4.65405e-08	GOLGA2P8	transcribed_unprocessed_pseudogene
ENSG00000214491.8	65.4152	1.05829	0.239903	4.41131	1.02746e-05	6.46835e-05	SEC14L6	protein_coding
ENSG00000214510.10	1.65044	1.28138	0.293558	4.36501	1.27118e-05	7.81443e-05	SPINK13	protein_coding
ENSG00000214513.4	0.606907	1.46444	0.39159	3.73972	0.000184226	0.000818321	NOTO	protein_coding
ENSG00000214548.18	921.502	1.68447	0.221752	7.59621	3.04937e-14	1.20495e-12	MEG3	lncRNA
ENSG00000214617.9	1.16847	2.8356	0.605832	4.68051	2.86165e-06	2.078e-05	SLC6A10P	transcribed_unprocessed_pseudogene
ENSG00000214691.9	1.13136	1.79636	0.369163	4.86603	1.13862e-06	9.15437e-06	LINC01913	lncRNA
ENSG00000214776.12	4.78717	1.15374	0.200749	5.74716	9.07574e-09	1.19816e-07	AC092821.1	transcribed_unprocessed_pseudogene
ENSG00000214814.7	88.618	1.81609	0.355717	5.10543	3.30044e-07	3.02425e-06	FER1L6	protein_coding
ENSG00000214929.4	3.0403	3.33591	0.663038	5.03126	4.87271e-07	4.28531e-06	SPATA31D1	protein_coding
ENSG00000215146.5	44.3356	1.61239	0.206901	7.79308	6.53953e-15	2.91418e-13	BX322639.1	transcribed_unprocessed_pseudogene
ENSG00000215148.11	0.865258	2.37304	0.600918	3.94902	7.84721e-05	0.000388213	PRSS41	protein_coding
ENSG00000215182.8	7.39917	1.05107	0.384192	2.73578	0.00622321	0.017288	MUC5AC	protein_coding
ENSG00000215237.6	4.29633	1.64228	0.263879	6.22361	4.8583e-10	8.57803e-09	AL592293.1	unprocessed_pseudogene
ENSG00000215246.5	41.0276	1.56021	0.265875	5.86821	4.40535e-09	6.23282e-08	AC116351.1	lncRNA
ENSG00000215512.9	4.63099	1.19528	0.489926	2.43971	0.0146989	0.035654	AP005901.1	transcribed_unprocessed_pseudogene
ENSG00000215533.8	14.5703	1.25932	0.257731	4.88617	1.02817e-06	8.36682e-06	LINC00189	lncRNA
ENSG00000215568.9	0.908262	1.21654	0.471453	2.58042	0.00986814	0.0255228	GAB4	protein_coding
ENSG00000215784.6	19.8851	1.33493	0.136491	9.78031	1.36797e-22	1.71797e-20	FAM72D	protein_coding
ENSG00000215808.4	49.4541	1.39009	0.361746	3.84272	0.000121677	0.000570008	LINC01139	lncRNA
ENSG00000215869.4	19.2062	1.5565	0.270704	5.7498	8.93464e-09	1.18255e-07	AC092506.1	transcribed_processed_pseudogene
ENSG00000216365.2	0.512789	1.60595	0.52513	3.0582	0.00222674	0.00716774	RPL37P15	processed_pseudogene
ENSG00000216867.2	0.623132	1.1778	0.223835	5.2619	1.42576e-07	1.4223e-06	RPL22P12	processed_pseudogene
ENSG00000217825.2	2.15726	2.36075	0.479415	4.92422	8.46955e-07	7.03135e-06	AC099552.1	lncRNA
ENSG00000218358.2	5.01648	1.10185	0.169097	6.51605	7.21827e-11	1.50993e-09	RAET1K	transcribed_unprocessed_pseudogene
ENSG00000219073.8	0.677667	1.21844	0.369696	3.29579	0.000981467	0.00354301	CELA3B	protein_coding
ENSG00000219700.1	1.48854	1.31515	0.333393	3.94474	7.98862e-05	0.000394023	PTCHD3P3	processed_pseudogene
ENSG00000220267.1	19.3336	1.97841	0.314187	6.29693	3.03596e-10	5.56824e-09	ACTBP8	processed_pseudogene
ENSG00000220891.1	0.813187	1.46266	0.463784	3.15374	0.0016119	0.00543587	LL22NC03-63E9.3	lncRNA
ENSG00000220908.2	1.06442	2.59285	0.623684	4.15732	3.22002e-05	0.000177024	LINC02531	lncRNA
ENSG00000221241.1	0.70599	1.03543	0.238219	4.34653	1.3831e-05	8.42149e-05	SNORD88A	snoRNA
ENSG00000221887.6	13.6099	1.18393	0.252912	4.6812	2.85197e-06	2.07141e-05	HMSD	protein_coding
ENSG00000222030.1	4.0451	1.99211	0.572107	3.48205	0.000497584	0.00196597	LINC01793	lncRNA
ENSG00000222486.1	0.461943	1.57336	0.593315	2.65182	0.00800599	0.021378	RNU6-77P	snRNA
ENSG00000222764.1	2.37658	1.61525	0.482896	3.34491	0.000823092	0.00304513	RN7SKP106	misc_RNA
ENSG00000222881.1	0.565831	1.21258	0.283708	4.27405	1.91952e-05	0.000112523	Y_RNA	misc_RNA
ENSG00000223392.1	1.34032	1.44607	0.573784	2.52024	0.0117276	0.0295123	CLDN10-AS1	lncRNA
ENSG00000223403.6	7.9786	1.37293	0.305377	4.49585	6.92913e-06	4.5782e-05	MEG9	lncRNA
ENSG00000223476.1	1.04157	1.25633	0.201766	6.22668	4.7643e-10	8.43473e-09	VN1R42P	processed_pseudogene
ENSG00000223553.6	2.19171	1.14599	0.33842	3.38629	0.00070845	0.00267137	SMPD4P1	transcribed_unprocessed_pseudogene
ENSG00000223629.1	0.886004	1.36533	0.469819	2.90608	0.00365985	0.0109767	DEFA8P	unprocessed_pseudogene
ENSG00000223756.7	18.0339	1.12437	0.1819	6.18127	6.35874e-10	1.09529e-08	TSSC2	transcribed_unprocessed_pseudogene
ENSG00000223760.4	1.53112	2.0255	0.511996	3.95608	7.61899e-05	0.000378059	MED15P9	transcribed_unprocessed_pseudogene
ENSG00000223784.2	5.44567	2.26575	0.47305	4.78966	1.67064e-06	1.29019e-05	LINP1	lncRNA
ENSG00000223791.1	0.988672	1.03844	0.227226	4.57006	4.87592e-06	3.33929e-05	UBE2E1-AS1	lncRNA
ENSG00000223812.8	2.48296	2.08932	0.446102	4.68351	2.81999e-06	2.05077e-05	AC073365.1	lncRNA
ENSG00000223823.1	1.00249	1.03491	0.274226	3.77392	0.0001607	0.000724439	LINC01342	lncRNA
ENSG00000223829.6	4.1915	1.68249	0.5353	3.14308	0.00167183	0.00560245	AC004870.2	lncRNA
ENSG00000223914.4	0.539907	1.07457	0.392002	2.74123	0.00612105	0.0170536	LINC02471	lncRNA
ENSG00000224040.1	1.00354	1.07481	0.254747	4.21912	2.45257e-05	0.000139404	HMGN1P4	processed_pseudogene
ENSG00000224078.15	1270.09	1.0269	0.160943	6.38051	1.76502e-10	3.4073e-09	SNHG14	lncRNA
ENSG00000224141.6	20.3723	1.24133	0.47618	2.60685	0.00913793	0.0239154	MIR548XHG	lncRNA
ENSG00000224189.8	310.436	1.47634	0.229139	6.44299	1.1714e-10	2.33982e-09	HAGLR	lncRNA
ENSG00000224209.8	1.06129	1.80884	0.364202	4.96659	6.81407e-07	5.80061e-06	LINC00466	lncRNA
ENSG00000224294.1	1.00668	1.16575	0.500781	2.32786	0.0199197	0.0459674	PINCR	lncRNA
ENSG00000224309.7	1.04013	1.76569	0.449224	3.93054	8.47554e-05	0.000415134	ANKRD30BP2	transcribed_unprocessed_pseudogene
ENSG00000224324.1	0.693316	1.16059	0.231549	5.0123	5.37825e-07	4.68812e-06	THAP5P1	processed_pseudogene
ENSG00000224413.1	2.94213	1.06164	0.29875	3.55361	0.000379979	0.00155081	AP001476.1	lncRNA
ENSG00000224426.1	1.85436	1.0632	0.254082	4.18449	2.85811e-05	0.000159232	SLC31A1P1	processed_pseudogene
ENSG00000224458.3	0.588558	1.2512	0.516951	2.42034	0.0155059	0.0373231	GUSBP6	transcribed_unprocessed_pseudogene
ENSG00000224525.2	0.989676	1.99454	0.473682	4.2107	2.54579e-05	0.000144039	AL591686.1	lncRNA
ENSG00000224537.1	0.82855	1.21703	0.449389	2.7082	0.00676493	0.0185365	MEP1AP4	unprocessed_pseudogene
ENSG00000224559.2	2.49096	2.25421	0.435175	5.18001	2.21876e-07	2.12263e-06	LINC01087	lncRNA
ENSG00000224566.2	10.4982	1.12469	0.203062	5.53864	3.04837e-08	3.57361e-07	FAM96AP2	processed_pseudogene
ENSG00000224679.1	1.33369	1.60818	0.64631	2.48824	0.0128376	0.0318689	MED15P4	unprocessed_pseudogene
ENSG00000224689.9	41.4539	1.00157	0.239414	4.18341	2.87167e-05	0.000159832	ZNF812P	transcribed_unprocessed_pseudogene
ENSG00000224728.1	2.89912	1.34742	0.175084	7.69586	1.40546e-14	5.85511e-13	IMPDH1P8	processed_pseudogene
ENSG00000224739.2	21.98	1.52801	0.270895	5.6406	1.69463e-08	2.10676e-07	AC016735.1	lncRNA
ENSG00000224775.2	1.12666	1.19317	0.404268	2.95144	0.00316296	0.00968404	BRAFP1	unprocessed_pseudogene
ENSG00000224807.5	0.821895	1.61566	0.673965	2.39724	0.0165189	0.0393472	DUX4L9	unprocessed_pseudogene
ENSG00000224817.2	10.746	1.26952	0.518559	2.44816	0.0143587	0.0349589	AC010789.1	lncRNA
ENSG00000224893.7	14.5619	1.08079	0.361392	2.99064	0.00278392	0.00867817	LINC02840	lncRNA
ENSG00000224963.3	2.52441	1.40521	0.323176	4.34811	1.37313e-05	8.37162e-05	U82695.1	transcribed_unitary_pseudogene
ENSG00000225058.1	4.38104	1.27946	0.22371	5.71929	1.06968e-08	1.39248e-07	AC092941.1	lncRNA
ENSG00000225087.2	2.71589	1.06041	0.420354	2.52266	0.0116471	0.0293395	AL583808.1	lncRNA
ENSG00000225117.2	1.20138	1.08869	0.29717	3.66354	0.000248757	0.00106682	ARSDP1	unprocessed_pseudogene
ENSG00000225127.3	0.932626	1.30759	0.566298	2.30902	0.0209424	0.047978	LINC00237	lncRNA
ENSG00000225206.10	2.31829	2.35087	0.46926	5.00974	5.45033e-07	4.74496e-06	MIR137HG	lncRNA
ENSG00000225255.6	3.03714	1.35261	0.389102	3.47623	0.000508524	0.00200278	PSLNR	lncRNA
ENSG00000225269.3	1.09404	1.0336	0.352085	2.93567	0.00332827	0.0101229	LINC00705	lncRNA
ENSG00000225329.3	42.1697	2.49145	0.321711	7.74437	9.60586e-15	4.14167e-13	LHFPL3-AS2	lncRNA
ENSG00000225385.3	5.8095	1.25969	0.233253	5.40054	6.64409e-08	7.18635e-07	AL353572.1	processed_pseudogene
ENSG00000225420.1	1.73104	1.49754	0.393471	3.80598	0.000141243	0.000647977	AC104134.1	lncRNA
ENSG00000225431.1	53.0042	1.00046	0.219197	4.56422	5.01356e-06	3.42258e-05	LINC01671	lncRNA
ENSG00000225530.1	7.10905	1.34337	0.405906	3.30956	0.000934414	0.00339587	SP3P	processed_pseudogene
ENSG00000225542.2	4.95323	1.30945	0.493845	2.65154	0.00801267	0.0213935	ZNF385D-AS1	lncRNA
ENSG00000225611.1	30.9431	1.0081	0.278145	3.62438	0.000289655	0.00122009	LINC02158	lncRNA
ENSG00000225678.2	0.725377	2.21522	0.515932	4.29363	1.75779e-05	0.000104171	AP000619.1	transcribed_unprocessed_pseudogene
ENSG00000225746.13	12.2024	2.04104	0.272353	7.4941	6.67533e-14	2.47625e-12	MEG8	lncRNA
ENSG00000225868.7	1.67631	1.26531	0.317197	3.98905	6.63391e-05	0.000334954	AC016582.1	transcribed_unprocessed_pseudogene
ENSG00000225972.1	129.095	1.66325	0.200549	8.29347	1.09987e-16	6.78309e-15	MTND1P23	unprocessed_pseudogene
ENSG00000225982.1	0.759295	1.07236	0.35328	3.03545	0.00240176	0.00763857	AL355482.2	lncRNA
ENSG00000226057.7	3.35998	2.82523	0.539687	5.23494	1.65039e-07	1.62156e-06	PHF2P2	transcribed_unprocessed_pseudogene
ENSG00000226074.5	2.08437	1.46438	0.282481	5.18402	2.17158e-07	2.08559e-06	PRSS44P	transcribed_unitary_pseudogene
ENSG00000226141.1	8.4868	1.63035	0.595512	2.73773	0.0061865	0.0172079	AC244107.1	unprocessed_pseudogene
ENSG00000226258.7	0.412935	1.05387	0.40825	2.58144	0.00983885	0.0254585	GRM7-AS3	lncRNA
ENSG00000226286.1	1.19111	1.12451	0.441837	2.54509	0.0109251	0.0277923	AL008733.1	lncRNA
ENSG00000226321.5	23.1241	1.24737	0.249299	5.0035	5.62989e-07	4.8865e-06	CROCC2	protein_coding
ENSG00000226330.1	17.2293	1.06422	0.121349	8.76998	1.78703e-18	1.39948e-16	AL606489.1	lncRNA
ENSG00000226372.4	19.5007	2.40104	0.530396	4.52689	5.98585e-06	4.01256e-05	DCAF8L1	protein_coding
ENSG00000226468.2	3.61308	1.55581	0.340132	4.57415	4.78154e-06	3.28366e-05	AC018641.1	processed_pseudogene
ENSG00000226476.6	38.9457	1.10527	0.322733	3.42474	0.000615391	0.00235963	LINC01748	lncRNA
ENSG00000226521.7	1.29223	1.69837	0.379735	4.4725	7.73096e-06	5.04147e-05	AC087499.2	transcribed_unprocessed_pseudogene
ENSG00000226539.1	2.37473	1.10885	0.357488	3.10179	0.00192353	0.00631954	MLXP1	processed_pseudogene
ENSG00000226562.4	5.3597	1.94909	0.278066	7.00943	2.39299e-12	6.67025e-11	CYP4F26P	lncRNA
ENSG00000226650.6	0.795675	1.18713	0.23458	5.06064	4.17855e-07	3.73793e-06	KIF4B	protein_coding
ENSG00000226652.3	7.63897	1.25339	0.182566	6.86539	6.63091e-12	1.68386e-10	PSMD10P2	transcribed_processed_pseudogene
ENSG00000226813.3	0.597498	1.0533	0.457846	2.30055	0.0214172	0.0489163	LINC01941	lncRNA
ENSG00000226887.8	42.4833	1.38857	0.315197	4.4054	1.05589e-05	6.62301e-05	ERVMER34-1	protein_coding
ENSG00000226933.1	0.952421	1.19208	0.336465	3.54296	0.000395667	0.00160705	NRBF2P2	processed_pseudogene
ENSG00000226985.7	4.04938	1.26123	0.237165	5.31795	1.04944e-07	1.08157e-06	LINC01203	lncRNA
ENSG00000227012.3	0.761361	1.63616	0.620547	2.63664	0.00837324	0.0221984	LINC02527	lncRNA
ENSG00000227043.3	2.10751	1.31602	0.385241	3.41609	0.000635262	0.00242881	LINC01682	lncRNA
ENSG00000227131.1	2.16246	1.1745	0.453391	2.59049	0.00958393	0.0248903	AL139275.2	lncRNA
ENSG00000227141.2	3.63007	1.8073	0.29209	6.18748	6.11354e-10	1.05727e-08	AL160286.1	processed_pseudogene
ENSG00000227195.11	11.533	1.61633	0.456126	3.5436	0.000394709	0.00160391	MIR663AHG	lncRNA
ENSG00000227234.2	0.928999	1.85936	0.530385	3.50568	0.000455448	0.00181758	SPANXB1	protein_coding
ENSG00000227440.1	8.90544	1.16735	0.163404	7.14395	9.06895e-13	2.77664e-11	ATP5MC1P4	processed_pseudogene
ENSG00000227640.3	2.32408	1.33233	0.274897	4.84664	1.25567e-06	9.99441e-06	SOX21-AS1	lncRNA
ENSG00000227706.4	3.97781	1.26985	0.533822	2.37879	0.0173697	0.0410511	AL713998.1	lncRNA
ENSG00000227755.1	3.88795	1.24423	0.30923	4.02363	5.73074e-05	0.000294344	AP000344.1	transcribed_processed_pseudogene
ENSG00000227777.1	3.30231	2.0889	0.33353	6.26301	3.77606e-10	6.80358e-09	AL031736.1	processed_pseudogene
ENSG00000227790.7	1.03666	1.19389	0.464923	2.56793	0.0102308	0.0262974	SPECC1P1	transcribed_unprocessed_pseudogene
ENSG00000227825.4	19.6839	1.01405	0.180199	5.6274	1.82946e-08	2.25732e-07	SLC9A7P1	transcribed_processed_pseudogene
ENSG00000227932.2	1.63387	3.0629	0.692199	4.42488	9.64962e-06	6.13624e-05	SELENOOLP	transcribed_unitary_pseudogene
ENSG00000228014.1	0.640681	1.05386	0.345604	3.04933	0.00229354	0.0073492	ZNF680P1	processed_pseudogene
ENSG00000228020.2	0.966088	1.29246	0.415692	3.10917	0.00187611	0.00618317	HNRNPA1P46	processed_pseudogene
ENSG00000228035.1	0.48255	1.27371	0.415386	3.06634	0.002167	0.00700877	NGF-AS1	lncRNA
ENSG00000228044.3	7.2673	1.87419	0.281567	6.6563	2.8081e-11	6.3761e-10	AL160408.1	lncRNA
ENSG00000228115.1	0.905472	1.0122	0.307783	3.28867	0.00100664	0.00361949	AL161725.2	lncRNA
ENSG00000228203.7	21.5685	1.71378	0.216854	7.90293	2.72432e-15	1.31863e-13	GRASLND	lncRNA
ENSG00000228286.3	1.4728	1.71146	0.543056	3.15153	0.00162416	0.00546971	AP000593.2	processed_pseudogene
ENSG00000228353.1	0.996734	1.10748	0.368504	3.00535	0.00265271	0.00832557	AL450322.1	lncRNA
ENSG00000228549.4	21.4392	1.02634	0.22436	4.57452	4.77312e-06	3.27853e-05	BX284668.2	lncRNA
ENSG00000228554.1	2.22079	1.00336	0.194272	5.16472	2.40803e-07	2.28849e-06	AC004837.2	lncRNA
ENSG00000228630.5	0.982153	1.78143	0.565291	3.15135	0.0016252	0.00547118	HOTAIR	lncRNA
ENSG00000228636.3	2.10359	2.49552	0.596496	4.18363	2.86892e-05	0.000159756	LINC02663	lncRNA
ENSG00000228643.1	1.18205	1.12662	0.296585	3.79864	0.000145495	0.000665275	AC079779.2	lncRNA
ENSG00000228742.11	2.12969	1.38869	0.319671	4.34411	1.39842e-05	8.50429e-05	LINC02577	lncRNA
ENSG00000228952.1	10.8938	1.26383	0.302314	4.18051	2.90851e-05	0.000161544	LINC02041	lncRNA
ENSG00000228956.8	15.8488	1.46189	0.201402	7.25859	3.91144e-13	1.2756e-11	SATB1-AS1	lncRNA
ENSG00000228966.2	15.0625	1.37113	0.499491	2.74505	0.0060502	0.0168794	HOMER2P1	processed_pseudogene
ENSG00000229107.2	1.07022	1.01277	0.250534	4.04245	5.28949e-05	0.0002741	ABHD17AP4	processed_pseudogene
ENSG00000229131.1	11.4811	1.24708	0.502911	2.47972	0.0131487	0.0324986	AC016710.1	lncRNA
ENSG00000229155.1	8.72875	1.28975	0.21354	6.03985	1.54261e-09	2.4472e-08	LINC02038	lncRNA
ENSG00000229167.2	9.00258	1.45222	0.215815	6.729	1.70834e-11	4.06052e-10	AC114488.1	lncRNA
ENSG00000229205.5	4.71875	1.01088	0.361322	2.79774	0.00514622	0.0147181	LINC00200	lncRNA
ENSG00000229212.8	0.7927	1.07566	0.247141	4.35243	1.34639e-05	8.22265e-05	AC044860.1	transcribed_unprocessed_pseudogene
ENSG00000229311.1	0.697589	2.01223	0.653332	3.07996	0.00207031	0.00673121	BX088651.2	lncRNA
ENSG00000229380.1	9.45652	2.57437	0.44984	5.72287	1.04738e-08	1.36603e-07	PRKAR1B-AS2	lncRNA
ENSG00000229386.3	0.823341	1.24034	0.460316	2.69454	0.00704851	0.0191947	OR8B9P	transcribed_unprocessed_pseudogene
ENSG00000229404.6	4.83414	1.0797	0.430227	2.5096	0.0120868	0.0302703	LINC00858	lncRNA
ENSG00000229558.2	5.5041	2.51638	0.559162	4.50027	6.78672e-06	4.49274e-05	SACS-AS1	lncRNA
ENSG00000229582.3	0.799559	1.04011	0.229946	4.52327	6.08913e-06	4.07468e-05	AL358074.1	lncRNA
ENSG00000229609.1	1.26361	1.34431	0.37412	3.59327	0.000326554	0.00135616	LINC01079	lncRNA
ENSG00000229618.3	3.39144	1.86579	0.262103	7.11853	1.09084e-12	3.28452e-11	AC011287.1	lncRNA
ENSG00000229637.4	1.11326	1.50987	0.561001	2.69139	0.00711548	0.0193496	PRAC2	protein_coding
ENSG00000229660.1	1.27213	1.04299	0.282046	3.69795	0.00021735	0.000947778	AC004975.2	lncRNA
ENSG00000229672.3	6.29748	1.03045	0.265999	3.87388	0.000107117	0.000510191	AL450322.2	lncRNA
ENSG00000229676.3	10.1818	2.40091	0.242621	9.89572	4.34454e-23	5.64072e-21	ZNF492	protein_coding
ENSG00000229835.2	0.99574	1.24986	0.299634	4.17129	3.02875e-05	0.000167576	KHSRPP1	processed_pseudogene
ENSG00000229855.9	1.35931	1.5891	0.658203	2.41429	0.0157657	0.0378482	AC008568.1	lncRNA
ENSG00000229876.1	13.002	1.11838	0.424284	2.63593	0.00839078	0.0222346	CASC20	lncRNA
ENSG00000229921.7	3.62605	1.62298	0.352836	4.59981	4.22875e-06	2.94029e-05	KIF25-AS1	lncRNA
ENSG00000229937.9	0.659106	1.36605	0.518518	2.63454	0.00842521	0.0223173	PRPS1L1	protein_coding
ENSG00000229970.3	4.08745	1.08706	0.410622	2.64735	0.00811251	0.0216233	AC007128.1	lncRNA
ENSG00000229976.2	14.5628	1.00159	0.338472	2.95916	0.00308477	0.00947995	AL118523.1	lncRNA
ENSG00000230010.2	1.8736	1.62308	0.245558	6.60978	3.84881e-11	8.51078e-10	AL049646.1	lncRNA
ENSG00000230121.1	0.948875	1.82578	0.466817	3.91112	9.18693e-05	0.000445868	AL445070.1	lncRNA
ENSG00000230131.6	2.37873	1.06078	0.276419	3.83759	0.000124245	0.000580562	LINC02641	lncRNA
ENSG00000230183.4	1.71754	1.59913	0.265721	6.01809	1.76491e-09	2.76055e-08	CNOT6LP1	processed_pseudogene
ENSG00000230269.7	6.04711	1.38858	0.433999	3.19949	0.00137671	0.00474889	LINC02525	lncRNA
ENSG00000230356.1	24.8601	1.9184	0.271288	7.07142	1.53353e-12	4.48449e-11	NCAPD2P1	processed_pseudogene
ENSG00000230426.4	32.9308	2.37973	0.314552	7.56545	3.86519e-14	1.4965e-12	LINC01036	lncRNA
ENSG00000230445.4	32.1781	1.16993	0.175797	6.65501	2.83287e-11	6.41548e-10	LRRC37A6P	transcribed_processed_pseudogene
ENSG00000230450.1	0.410407	1.43145	0.391037	3.66066	0.000251568	0.00107727	NEK2P4	processed_pseudogene
ENSG00000230453.9	9.11522	2.15192	0.281199	7.65264	1.96894e-14	8.02823e-13	ANKRD18B	protein_coding
ENSG00000230524.8	3.61188	1.22125	0.227817	5.36065	8.29218e-08	8.76044e-07	COL6A4P1	transcribed_unprocessed_pseudogene
ENSG00000230563.4	2.33536	1.67064	0.302563	5.52162	3.35897e-08	3.89803e-07	AL121757.1	lncRNA
ENSG00000230570.1	1.07632	2.2142	0.423045	5.23397	1.6591e-07	1.62873e-06	AL139095.3	processed_pseudogene
ENSG00000230606.11	5.06723	1.12275	0.208226	5.39198	6.96862e-08	7.49512e-07	AC092683.1	lncRNA
ENSG00000230638.4	2.32747	1.01839	0.239153	4.25833	2.05962e-05	0.000119769	AL445933.1	processed_pseudogene
ENSG00000230729.1	0.46279	1.11185	0.334109	3.32781	0.000875323	0.00321017	AL160270.1	lncRNA
ENSG00000230798.5	2.11123	1.89697	0.421958	4.49564	6.93603e-06	4.58104e-05	FOXD3-AS1	lncRNA
ENSG00000230836.1	1.42028	1.30924	0.308192	4.24814	2.15552e-05	0.000124321	LINC01293	lncRNA
ENSG00000230863.3	5.69866	1.46802	0.314658	4.66546	3.07929e-06	2.21555e-05	AL137803.1	transcribed_processed_pseudogene
ENSG00000230873.9	52.0736	1.44825	0.230973	6.27021	3.60568e-10	6.52651e-09	STMND1	protein_coding
ENSG00000230991.2	7.95962	1.01026	0.42499	2.37714	0.0174475	0.0412011	AC092625.1	lncRNA
ENSG00000231031.6	1.59868	1.70839	0.62742	2.72288	0.00647151	0.0178695	LINC01804	lncRNA
ENSG00000231066.3	2.35302	1.21021	0.152656	7.92772	2.23209e-15	1.09968e-13	NPM1P9	processed_pseudogene
ENSG00000231106.2	58.1377	1.30987	0.286173	4.57719	4.71261e-06	3.24097e-05	LINC01436	lncRNA
ENSG00000231107.2	4.73462	1.18245	0.497181	2.37832	0.0173918	0.0410977	LINC01508	lncRNA
ENSG00000231156.1	1.28156	1.3368	0.462417	2.8909	0.00384145	0.0114542	AC093702.1	lncRNA
ENSG00000231171.4	0.60221	1.12244	0.474645	2.3648	0.0180397	0.0424053	LINC01098	lncRNA
ENSG00000231205.11	89.774	1.48513	0.185497	8.00621	1.18295e-15	6.16203e-14	ZNF826P	transcribed_unprocessed_pseudogene
ENSG00000231208.4	2.05106	1.91213	0.4849	3.94335	8.03504e-05	0.000396143	ZBTB46-AS1	lncRNA
ENSG00000231252.3	6.49504	1.65487	0.274307	6.03293	1.61009e-09	2.54491e-08	AC099792.1	lncRNA
ENSG00000231419.6	23.8246	1.47193	0.352629	4.17416	2.99092e-05	0.000165724	LINC00689	lncRNA
ENSG00000231431.7	4.75505	1.70516	0.478045	3.56695	0.000361158	0.00148329	FAR2P4	transcribed_unprocessed_pseudogene
ENSG00000231442.3	0.626099	2.32248	0.738364	3.14544	0.00165834	0.00556369	LARP1BP1	processed_pseudogene
ENSG00000231443.2	6.99409	1.49722	0.161033	9.29762	1.43625e-20	1.46752e-18	AC124944.1	processed_pseudogene
ENSG00000231464.1	1.85253	1.58577	0.224394	7.0669	1.58434e-12	4.62916e-11	AC024937.2	processed_pseudogene
ENSG00000231513.3	0.966569	1.44032	0.484257	2.97429	0.0029367	0.00908555	E2F6P4	processed_pseudogene
ENSG00000231532.6	2.73864	2.63951	0.569633	4.6337	3.59179e-06	2.54037e-05	LINC01249	lncRNA
ENSG00000231563.2	4.60307	1.03687	0.210071	4.93584	7.98059e-07	6.66226e-06	AL139288.1	lncRNA
ENSG00000231689.2	1.01629	2.15407	0.481748	4.47136	7.77239e-06	5.06467e-05	LINC01090	lncRNA
ENSG00000231720.1	4.67235	1.37999	0.355863	3.87786	0.000105378	0.00050302	AL353747.3	lncRNA
ENSG00000231738.11	0.718591	1.95036	0.480704	4.05729	4.96448e-05	0.000259581	TSPAN19	protein_coding
ENSG00000231764.10	22.438	1.11556	0.399158	2.7948	0.00519326	0.0148215	DLX6-AS1	lncRNA
ENSG00000231881.2	16.1264	1.04073	0.22201	4.68776	2.76214e-06	2.01464e-05	AL109615.2	lncRNA
ENSG00000231918.1	1.27606	2.84504	0.597705	4.75993	1.93656e-06	1.46895e-05	AC007402.1	lncRNA
ENSG00000231920.1	1.07095	1.55891	0.389658	4.00073	6.31481e-05	0.000320671	NEBL-AS1	lncRNA
ENSG00000231976.8	0.555419	1.25744	0.381142	3.29914	0.000969817	0.00350718	FAM238B	transcribed_unprocessed_pseudogene
ENSG00000232006.9	7.26457	1.05675	0.36118	2.92582	0.00343545	0.0104125	AC005537.1	lncRNA
ENSG00000232044.7	1.46469	2.14139	0.455255	4.70373	2.55453e-06	1.88029e-05	SILC1	lncRNA
ENSG00000232109.1	0.614751	1.54449	0.618553	2.49694	0.012527	0.0312032	VN1R54P	processed_pseudogene
ENSG00000232216.1	16.9299	1.04578	0.295541	3.53853	0.000402367	0.00163158	IGHV3-43	IG_V_gene
ENSG00000232363.1	0.968553	1.71467	0.302113	5.6756	1.382e-08	1.75927e-07	AL021391.1	lncRNA
ENSG00000232416.3	1.86243	1.15683	0.289311	3.99856	6.37295e-05	0.000323291	BPESC1	lncRNA
ENSG00000232448.2	2.30799	1.31425	0.233524	5.62791	1.82406e-08	2.25307e-07	AL354824.2	lncRNA
ENSG00000232456.1	1.8492	1.11723	0.363045	3.0774	0.00208813	0.00677933	AL355994.2	unprocessed_pseudogene
ENSG00000232508.1	3.68231	1.12374	0.290868	3.86339	0.000111822	0.000529172	MRPL45P1	processed_pseudogene
ENSG00000232517.2	3.32676	1.04596	0.20637	5.06834	4.0129e-07	3.61098e-06	CSPG4BP	unitary_pseudogene
ENSG00000232680.2	1.37825	1.21725	0.324034	3.75656	0.000172266	0.000771246	AC002511.1	lncRNA
ENSG00000232727.2	5.86577	1.7568	0.304255	5.77409	7.73681e-09	1.0413e-07	YWHAEP1	processed_pseudogene
ENSG00000232765.6	7.31126	1.23054	0.417528	2.94719	0.00320674	0.0098033	AL158819.1	transcribed_unprocessed_pseudogene
ENSG00000232790.3	0.749852	1.7845	0.706596	2.52548	0.0115539	0.0291536	LINC01162	lncRNA
ENSG00000232803.1	4.80769	1.57401	0.369642	4.2582	2.06083e-05	0.000119814	SLCO4A1-AS1	lncRNA
ENSG00000232827.3	1.21105	1.70982	0.612431	2.79185	0.00524071	0.0149346	LINC01189	lncRNA
ENSG00000232862.5	0.536482	1.06511	0.315082	3.38042	0.000723749	0.0027225	AL138787.1	transcribed_processed_pseudogene
ENSG00000232895.2	0.503998	1.24338	0.433659	2.86718	0.00414146	0.0122258	AL121999.1	lncRNA
ENSG00000232906.1	1.56569	1.44773	0.299985	4.82603	1.39285e-06	1.09575e-05	AC092685.1	processed_pseudogene
ENSG00000233017.3	0.589949	1.57239	0.588202	2.67322	0.00751264	0.0202568	AL121832.1	lncRNA
ENSG00000233080.3	1.94226	1.22392	0.323282	3.78591	0.000153147	0.000694654	LINC01399	transcribed_processed_pseudogene
ENSG00000233214.1	1.99723	1.36898	0.323457	4.23234	2.31277e-05	0.000132505	AC002511.2	lncRNA
ENSG00000233256.1	0.720355	1.15507	0.446826	2.58506	0.00973624	0.025227	AL355870.1	lncRNA
ENSG00000233296.2	2.03912	1.78801	0.326593	5.47473	4.38186e-08	4.96008e-07	TMEM18-DT	lncRNA
ENSG00000233359.2	7.79864	1.47492	0.541315	2.7247	0.0064359	0.0177901	AC114485.1	lncRNA
ENSG00000233379.2	2.37522	1.10618	0.394417	2.8046	0.00503793	0.0144498	AL139002.1	lncRNA
ENSG00000233388.2	0.478844	1.06521	0.33616	3.16877	0.00153085	0.00520367	AL022334.1	processed_pseudogene
ENSG00000233392.5	41.4934	1.91406	0.252193	7.58965	3.20779e-14	1.26322e-12	UICLM	lncRNA
ENSG00000233421.4	6.93433	1.11967	0.245729	4.55655	5.20012e-06	3.53248e-05	LINC01783	lncRNA
ENSG00000233491.8	18.5849	1.81672	0.339364	5.35331	8.63614e-08	9.08491e-07	AC008163.1	transcribed_unitary_pseudogene
ENSG00000233515.2	15.3928	1.77738	0.391874	4.53559	5.74435e-06	3.87167e-05	LINC01518	lncRNA
ENSG00000233532.6	1.8603	1.67726	0.409566	4.09521	4.21789e-05	0.000224867	LINC00460	lncRNA
ENSG00000233589.1	0.527285	1.07593	0.338168	3.18164	0.00146445	0.00501051	AL138789.1	lncRNA
ENSG00000233610.1	1.247	2.14824	0.385007	5.57976	2.40855e-08	2.88926e-07	LINC00462	lncRNA
ENSG00000233714.1	1.04572	1.20645	0.270356	4.46247	8.10199e-06	5.24973e-05	AC012506.3	lncRNA
ENSG00000233836.7	41.0578	1.18333	0.195195	6.0623	1.34188e-09	2.15851e-08	AC139769.1	transcribed_unprocessed_pseudogene
ENSG00000233854.2	4.32939	1.64486	0.521806	3.15225	0.00162018	0.00545897	POU6F2-AS2	lncRNA
ENSG00000233922.3	19.4217	2.01693	0.270222	7.46398	8.39481e-14	3.07122e-12	LINC01694	lncRNA
ENSG00000234042.1	3.75622	1.18827	0.22456	5.29153	1.21296e-07	1.22919e-06	AL591438.2	processed_pseudogene
ENSG00000234068.7	66.3427	1.77142	0.559733	3.16475	0.00155217	0.00526166	PAGE2	protein_coding
ENSG00000234146.1	0.409217	1.07891	0.436757	2.47028	0.0135009	0.0332216	AKAP8P1	processed_pseudogene
ENSG00000234232.7	0.523738	1.06577	0.324329	3.28606	0.00101598	0.00364738	AC243772.3	transcribed_unprocessed_pseudogene
ENSG00000234264.1	1.64645	1.99024	0.249023	7.9922	1.32557e-15	6.78221e-14	DEPDC1-AS1	lncRNA
ENSG00000234311.1	6.16848	2.71691	0.35427	7.66904	1.73286e-14	7.1076e-13	AL451069.3	lncRNA
ENSG00000234352.9	2.15807	1.31187	0.470975	2.78544	0.00534547	0.0151981	AC009264.1	lncRNA
ENSG00000234373.1	0.978181	2.03368	0.354023	5.74448	9.22047e-09	1.21541e-07	SNX18P7	processed_pseudogene
ENSG00000234393.1	1.40172	1.07035	0.188498	5.67829	1.36047e-08	1.73506e-07	AL592546.2	lncRNA
ENSG00000234425.1	2.21785	1.36995	0.302805	4.52421	6.06211e-06	4.05738e-05	AL138930.1	lncRNA
ENSG00000234426.3	9.12945	2.45581	0.439332	5.58987	2.27241e-08	2.74118e-07	AL139042.1	lncRNA
ENSG00000234493.4	0.92735	1.88591	0.464983	4.05586	4.99494e-05	0.000260819	RHOXF1P1	transcribed_unprocessed_pseudogene
ENSG00000234537.1	0.498234	1.11909	0.38697	2.89194	0.00382875	0.0114208	AL354751.1	unprocessed_pseudogene
ENSG00000234575.2	1.80322	1.36701	0.440913	3.10041	0.00193255	0.00634554	CTSLP8	unprocessed_pseudogene
ENSG00000234602.9	4.88007	1.55236	0.304804	5.09296	3.52525e-07	3.20896e-06	MCIDAS	protein_coding
ENSG00000234629.1	2.21038	2.40245	0.465238	5.16391	2.41839e-07	2.29644e-06	WDR82P1	processed_pseudogene
ENSG00000234710.2	2.17825	1.46727	0.522867	2.8062	0.00501302	0.0143951	AC060834.2	lncRNA
ENSG00000234722.5	503.195	1.53943	0.428129	3.5957	0.000323517	0.0013442	LINC01287	lncRNA
ENSG00000234928.1	3.34359	1.55327	0.359975	4.31494	1.59645e-05	9.57536e-05	LINC01659	lncRNA
ENSG00000235023.1	6.41806	1.31722	0.284385	4.63182	3.62457e-06	2.5604e-05	AP001626.1	lncRNA
ENSG00000235026.6	17.537	1.52678	0.610927	2.49911	0.0124505	0.0310418	DPP10-AS1	lncRNA
ENSG00000235029.1	3.35939	1.24181	0.455676	2.72521	0.00642608	0.0177687	MNX1-AS2	lncRNA
ENSG00000235111.1	4.52042	1.01957	0.199302	5.11569	3.12595e-07	2.88041e-06	Z97192.3	lncRNA
ENSG00000235162.9	635.883	1.36179	0.177902	7.65474	1.93698e-14	7.90726e-13	C12orf75	protein_coding
ENSG00000235205.1	0.423266	1.1456	0.499946	2.29145	0.0219377	0.0499169	TATDN2P3	processed_pseudogene
ENSG00000235221.3	7.5638	1.21226	0.436311	2.77842	0.00546239	0.0154681	LINC00383	lncRNA
ENSG00000235330.2	3.62153	1.01821	0.237034	4.29561	1.74213e-05	0.000103378	RPL12P25	transcribed_processed_pseudogene
ENSG00000235338.1	0.699932	1.02611	0.412751	2.48604	0.0129175	0.0320349	DUSP5P2	processed_pseudogene
ENSG00000235493.2	3.39983	1.51914	0.403749	3.76258	0.000168168	0.00075456	LINC01967	lncRNA
ENSG00000235494.2	0.805299	1.00221	0.378192	2.65	0.00804914	0.0214727	AL590705.2	lncRNA
ENSG00000235538.4	0.506739	1.26562	0.391273	3.23463	0.001218	0.00427662	AL078602.1	lncRNA
ENSG00000235546.2	0.737011	1.91724	0.638075	3.00472	0.00265824	0.0083406	AC087499.4	processed_pseudogene
ENSG00000235621.9	42.4679	2.51522	0.332336	7.56829	3.7817e-14	1.46912e-12	LINC00494	lncRNA
ENSG00000235651.1	1.20441	1.55405	0.214254	7.25332	4.06677e-13	1.32375e-11	G3BP1P1	processed_pseudogene
ENSG00000235687.9	2.75232	1.7322	0.635907	2.72398	0.00645001	0.017822	LINC00993	transcribed_unprocessed_pseudogene
ENSG00000235721.1	0.751364	1.69563	0.446938	3.79388	0.000148312	0.000676005	AC013268.3	processed_pseudogene
ENSG00000235748.1	2.17357	1.55858	0.200817	7.76119	8.41345e-15	3.67341e-13	SEPTIN14P12	processed_pseudogene
ENSG00000235774.2	3.34714	1.04408	0.451127	2.31439	0.0206462	0.047422	AC023347.1	lncRNA
ENSG00000235857.1	0.518996	1.61329	0.579013	2.78628	0.00533167	0.0151651	CTBP2P1	processed_pseudogene
ENSG00000235934.2	1.82035	1.78353	0.372863	4.78332	1.72421e-06	1.32642e-05	AC007405.2	lncRNA
ENSG00000235994.4	0.829106	1.93642	0.436332	4.43796	9.08164e-06	5.81037e-05	HGC6.3	lncRNA
ENSG00000236056.1	16.3558	1.01077	0.238212	4.24316	2.20397e-05	0.00012688	GAPDHP14	processed_pseudogene
ENSG00000236212.2	3.18378	1.41998	0.435151	3.26318	0.0011017	0.00391607	AC009262.1	lncRNA
ENSG00000236279.7	44.5702	1.85125	0.393162	4.70862	2.49397e-06	1.84121e-05	CLEC2L	protein_coding
ENSG00000236289.4	1.26861	1.78127	0.416977	4.27187	1.93842e-05	0.000113486	GACAT3	lncRNA
ENSG00000236318.2	0.969864	1.23884	0.333171	3.71834	0.000200538	0.000881478	AC019117.2	lncRNA
ENSG00000236333.4	80.8616	1.3633	0.385133	3.53981	0.000400422	0.00162426	TRHDE-AS1	lncRNA
ENSG00000236412.1	4.08655	1.16801	0.199355	5.85896	4.65778e-09	6.55774e-08	AC092941.2	lncRNA
ENSG00000236446.3	1.45868	1.20924	0.511468	2.36425	0.0180668	0.0424488	CT47B1	protein_coding
ENSG00000236516.1	1.5335	1.67426	0.565549	2.96042	0.00307224	0.00944986	KLF2P4	processed_pseudogene
ENSG00000236580.1	0.957622	1.76946	0.508363	3.4807	0.000500111	0.00197415	AC073626.2	processed_pseudogene
ENSG00000236648.2	0.981728	1.75889	0.700517	2.51084	0.0120445	0.0301798	LINC02810	lncRNA
ENSG00000236654.2	0.55315	1.07218	0.304518	3.5209	0.000430077	0.00172711	AC079780.1	processed_pseudogene
ENSG00000236699.9	47.1581	1.05359	0.211005	4.99319	5.93899e-07	5.12644e-06	ARHGEF38	protein_coding
ENSG00000236956.2	1.07933	1.81539	0.716385	2.5341	0.0112737	0.0285669	NF1P8	unprocessed_pseudogene
ENSG00000236957.7	0.903891	1.04783	0.44353	2.36247	0.0181536	0.0426006	AL139010.1	transcribed_unprocessed_pseudogene
ENSG00000237153.4	0.513273	1.77735	0.567075	3.13424	0.00172299	0.00574665	AL162725.2	lncRNA
ENSG00000237206.1	1.1302	2.32175	0.722201	3.21483	0.00130523	0.00453268	IMPDH1P4	processed_pseudogene
ENSG00000237289.10	24.3807	1.85949	0.369567	5.03153	4.86589e-07	4.2804e-06	CKMT1B	protein_coding
ENSG00000237423.3	3.11087	1.39787	0.313264	4.46229	8.109e-06	5.25328e-05	LINC01522	lncRNA
ENSG00000237438.7	37.6512	1.40539	0.304957	4.6085	4.05578e-06	2.83429e-05	CECR7	transcribed_unprocessed_pseudogene
ENSG00000237510.7	2.77252	1.48714	0.303332	4.90267	9.45428e-07	7.75013e-06	GPAT2P1	transcribed_unprocessed_pseudogene
ENSG00000237649.8	733.792	1.52362	0.112915	13.4935	1.70779e-41	6.93884e-39	KIFC1	protein_coding
ENSG00000237686.7	54.2094	1.41716	0.226136	6.26685	3.68423e-10	6.65474e-09	AL109615.3	lncRNA
ENSG00000237713.1	0.447519	1.50206	0.59123	2.54057	0.0110673	0.0281003	AC011287.2	lncRNA
ENSG00000237732.9	1.35813	1.5963	0.34119	4.67864	2.88786e-06	2.09527e-05	CT75	transcribed_unprocessed_pseudogene
ENSG00000237751.2	1.17829	1.13474	0.461738	2.45754	0.0139892	0.0342111	LINC01143	lncRNA
ENSG00000237849.1	2.38689	1.10642	0.325073	3.40361	0.000665012	0.00252549	NFYAP1	processed_pseudogene
ENSG00000238120.1	6.69164	1.27712	0.293936	4.3449	1.39339e-05	8.4797e-05	LINC01589	lncRNA
ENSG00000239093.1	1.04819	1.20953	0.33623	3.59734	0.000321492	0.00133756	AC068299.1	snoRNA
ENSG00000239589.7	10.7107	2.40335	0.631621	3.80505	0.000141773	0.000650063	LINC00879	lncRNA
ENSG00000239620.3	1.15098	1.72369	0.406849	4.23669	2.26839e-05	0.0001302	PRR20G	protein_coding
ENSG00000239642.6	1.00476	1.82313	0.60901	2.99359	0.00275715	0.00860412	MEIKIN	protein_coding
ENSG00000239855.1	65.0079	1.16162	0.302229	3.84349	0.000121295	0.000568469	IGKV1-6	IG_V_gene
ENSG00000240204.3	17.693	1.16002	0.218944	5.29826	1.16912e-07	1.19106e-06	SMKR1	protein_coding
ENSG00000240216.7	44.7647	1.51954	0.20606	7.37427	1.65247e-13	5.70696e-12	CPHL1P	transcribed_unitary_pseudogene
ENSG00000240224.1	9.43478	1.0627	0.281582	3.77403	0.000160629	0.000724213	UGT1A5	protein_coding
ENSG00000240241.5	4.66576	2.40563	0.504725	4.76622	1.87712e-06	1.43014e-05	AC108752.1	lncRNA
ENSG00000240253.6	0.530624	1.2131	0.478028	2.53772	0.0111576	0.0283108	FAR2P3	transcribed_unprocessed_pseudogene
ENSG00000240280.7	25.1616	1.80619	0.322736	5.59649	2.18736e-08	2.64877e-07	TCAM1P	transcribed_unitary_pseudogene
ENSG00000240429.1	16.0607	1.08364	0.139154	7.78735	6.84272e-15	3.04145e-13	LRRFIP1P1	processed_pseudogene
ENSG00000241149.3	3.69513	3.57669	0.598806	5.97304	2.32878e-09	3.53836e-08	ZNF722P	protein_coding
ENSG00000241155.1	2.34346	1.47167	0.250883	5.86596	4.46546e-09	6.31011e-08	ARHGAP31-AS1	lncRNA
ENSG00000241207.1	1.06286	2.27468	0.614573	3.70124	0.000214549	0.00093663	AC245047.5	unprocessed_pseudogene
ENSG00000241361.8	4.22935	1.68947	0.424938	3.97579	7.01459e-05	0.000351401	SLC25A24P1	transcribed_unprocessed_pseudogene
ENSG00000241369.6	3.17187	1.47126	0.358127	4.10822	3.98721e-05	0.00021399	LINC01192	lncRNA
ENSG00000241475.1	1.90351	1.98117	0.503768	3.9327	8.39974e-05	0.000411772	AL160408.4	lncRNA
ENSG00000241634.1	3.32062	1.51555	0.176562	8.58367	9.18958e-18	6.59815e-16	AC069499.1	processed_pseudogene
ENSG00000241721.1	0.531603	1.42038	0.395824	3.58841	0.000332703	0.00137855	SUMO1P1	processed_pseudogene
ENSG00000242068.1	0.868229	1.09822	0.29748	3.69175	0.000222715	0.000968481	AC108734.3	processed_pseudogene
ENSG00000242207.1	0.572908	1.86562	0.58108	3.2106	0.00132458	0.0045915	HOXB-AS4	lncRNA
ENSG00000242265.6	9363.1	1.08514	0.302167	3.59119	0.000329173	0.00136589	PEG10	protein_coding
ENSG00000242366.3	3.49086	3.04423	0.45956	6.62423	3.49069e-11	7.78775e-10	UGT1A8	protein_coding
ENSG00000242440.2	5.52845	3.45405	0.48881	7.06625	1.59181e-12	4.64707e-11	LINC02046	lncRNA
ENSG00000242515.5	54.1686	2.33429	0.421165	5.54246	2.9826e-08	3.50376e-07	UGT1A10	protein_coding
ENSG00000242779.7	52.975	1.4826	0.169771	8.73294	2.4814e-18	1.90017e-16	ZNF702P	transcribed_processed_pseudogene
ENSG00000242781.2	2.86435	1.3537	0.38813	3.48776	0.000487087	0.00192957	LINC02050	lncRNA
ENSG00000242790.1	0.828083	1.33681	0.564923	2.36636	0.017964	0.0422649	AC104831.1	lncRNA
ENSG00000242828.1	4.31154	1.79361	0.376507	4.76382	1.89962e-06	1.44473e-05	AC068756.1	lncRNA
ENSG00000242876.3	1.0243	1.26089	0.22315	5.65043	1.60048e-08	2.00342e-07	RN7SL812P	misc_RNA
ENSG00000242950.7	1.96131	1.01368	0.236512	4.28595	1.81956e-05	0.000107346	ERVW-1	protein_coding
ENSG00000243040.6	13.7339	1.63077	0.699329	2.3319	0.0197059	0.0455531	RBMY2FP	transcribed_unprocessed_pseudogene
ENSG00000243352.3	1.40112	1.74066	0.450341	3.86521	0.000110993	0.00052604	RN7SL8P	misc_RNA
ENSG00000243479.3	21.5165	1.53773	0.513562	2.99423	0.00275135	0.00859059	MNX1-AS1	lncRNA
ENSG00000243537.1	6.64594	1.43006	0.25681	5.56855	2.56875e-08	3.06017e-07	KC877373.1	processed_pseudogene
ENSG00000243709.1	34.0332	1.10707	0.23385	4.73408	2.2005e-06	1.6453e-05	LEFTY1	protein_coding
ENSG00000243810.1	4.45808	2.57647	0.404442	6.37042	1.88511e-10	3.62294e-09	CFAP61-AS1	lncRNA
ENSG00000243877.1	0.682138	2.16883	0.591433	3.66708	0.000245334	0.00105384	HMGB1P38	processed_pseudogene
ENSG00000244040.7	2.16375	1.40859	0.247051	5.70163	1.18667e-08	1.53379e-07	IL12A-AS1	lncRNA
ENSG00000244048.1	1.41992	1.76943	0.453855	3.89867	9.67222e-05	0.000466471	RPS18P6	processed_pseudogene
ENSG00000244122.2	11.9438	1.30826	0.224109	5.83758	5.29648e-09	7.35797e-08	UGT1A7	protein_coding
ENSG00000244144.1	0.624104	1.56622	0.361871	4.32811	1.50392e-05	9.08349e-05	AC128688.1	processed_pseudogene
ENSG00000244234.3	9.50553	1.00564	0.332825	3.02151	0.00251515	0.00795015	GMCL2	protein_coding
ENSG00000244471.6	4.85047	1.212	0.386767	3.13368	0.00172631	0.00575424	AL137058.1	transcribed_unprocessed_pseudogene
ENSG00000244578.1	0.46785	1.05021	0.400782	2.6204	0.0087826	0.0231205	LINC01391	lncRNA
ENSG00000244649.5	2.50908	1.45803	0.257616	5.65971	1.51627e-08	1.90908e-07	LINC02086	lncRNA
ENSG00000244682.7	56.553	1.10674	0.184344	6.00365	1.92924e-09	2.98514e-08	FCGR2C	polymorphic_pseudogene
ENSG00000245080.7	1.98644	1.01843	0.212915	4.78326	1.72478e-06	1.32642e-05	MIR3150BHG	lncRNA
ENSG00000245662.4	10.0687	1.34826	0.324152	4.15933	3.19181e-05	0.000175613	LINC02211	lncRNA
ENSG00000245832.7	1.89901	1.10763	0.373728	2.96375	0.00303919	0.00936318	MIR4300HG	lncRNA
ENSG00000246095.2	1.43521	1.49037	0.510586	2.91894	0.00351221	0.0106085	LINC01096	lncRNA
ENSG00000246465.1	4.87731	1.75279	0.233634	7.5023	6.27071e-14	2.34125e-12	AC138904.1	lncRNA
ENSG00000246876.7	5.78049	1.00129	0.336644	2.97432	0.0029364	0.00908544	LINC02466	lncRNA
ENSG00000247345.2	1.51036	2.03318	0.469567	4.3299	1.49175e-05	9.01628e-05	AC092343.1	lncRNA
ENSG00000247402.2	0.773299	1.14262	0.392196	2.91339	0.00357525	0.0107669	AC099487.1	lncRNA
ENSG00000248103.1	1.98968	1.35009	0.372584	3.62359	0.000290537	0.00122321	AC008443.2	lncRNA
ENSG00000248131.6	24.2738	1.14739	0.412286	2.78299	0.00538598	0.0152931	LINC01194	lncRNA
ENSG00000248191.1	4.62353	1.2502	0.357039	3.50157	0.000462524	0.00184241	PES1P1	processed_pseudogene
ENSG00000248215.6	2.81718	2.26073	0.568071	3.97966	6.90151e-05	0.000346339	LINC02505	lncRNA
ENSG00000248268.1	0.648462	1.23018	0.443101	2.77629	0.00549828	0.0155506	AC010275.1	lncRNA
ENSG00000248370.2	1.81365	1.77789	0.515923	3.44603	0.000568894	0.00220608	LINC02434	lncRNA
ENSG00000248408.1	0.675118	1.37747	0.576948	2.38751	0.0169628	0.0402354	LINC02469	lncRNA
ENSG00000248431.2	26.3556	2.53765	0.495855	5.11772	3.09245e-07	2.85717e-06	AC021134.1	lncRNA
ENSG00000248475.5	0.869126	1.80564	0.53135	3.39822	0.000678268	0.00257018	AC016642.1	lncRNA
ENSG00000248510.2	6.22097	1.35649	0.498473	2.72128	0.00650295	0.017939	LINC02267	lncRNA
ENSG00000248599.2	1.0731	1.08704	0.315619	3.44416	0.000572837	0.00221888	FLJ42969	lncRNA
ENSG00000248608.2	2.84596	2.57794	0.450924	5.71702	1.08411e-08	1.40914e-07	AC133963.1	processed_pseudogene
ENSG00000248663.6	24.268	1.56088	0.28487	5.47928	4.27051e-08	4.84992e-07	LINC00992	lncRNA
ENSG00000248762.2	0.820799	1.72378	0.602609	2.86053	0.00422933	0.0124448	AC012339.1	lncRNA
ENSG00000248763.2	2.95633	1.24404	0.309859	4.01485	5.94836e-05	0.000304041	AC111000.2	unprocessed_pseudogene
ENSG00000248771.5	58.9027	1.12654	0.41751	2.69824	0.00697069	0.0190113	SMIM31	protein_coding
ENSG00000248783.1	6.06769	1.08005	0.39488	2.73514	0.00623538	0.0173163	AC106771.1	lncRNA
ENSG00000248817.1	2.58407	1.43877	0.366512	3.92557	8.65258e-05	0.000422726	PMPCAP1	processed_pseudogene
ENSG00000248827.1	1.7872	1.11263	0.357459	3.11261	0.00185443	0.00612104	AC024587.1	processed_pseudogene
ENSG00000248837.7	14.8579	1.24207	0.356467	3.4844	0.000493236	0.00195013	AC097512.1	lncRNA
ENSG00000248973.3	1.00902	2.0054	0.513626	3.90439	9.44632e-05	0.000456916	AC106799.2	lncRNA
ENSG00000249028.2	0.621473	1.114	0.320191	3.47917	0.00050297	0.00198385	AC004672.1	lncRNA
ENSG00000249174.1	1.21257	2.02776	0.583603	3.47456	0.000511699	0.00201391	AC106744.1	lncRNA
ENSG00000249196.6	6.64836	1.17679	0.493401	2.38506	0.0170764	0.0404686	TMEM132D-AS1	lncRNA
ENSG00000249295.1	1.21086	1.27919	0.315523	4.0542	5.03055e-05	0.0002624	AC145146.1	lncRNA
ENSG00000249330.3	4.44054	1.20358	0.358247	3.35963	0.000780459	0.00290577	AC095060.1	lncRNA
ENSG00000249363.1	0.465711	1.02862	0.289738	3.55017	0.000384983	0.00156882	AC011411.1	processed_pseudogene
ENSG00000249626.1	14.5032	1.46431	0.155727	9.40307	5.29927e-21	5.75521e-19	AC024560.2	processed_pseudogene
ENSG00000249628.3	77.5651	1.36207	0.33383	4.08013	4.50096e-05	0.000237848	LINC00942	lncRNA
ENSG00000249641.2	0.721971	1.63435	0.650001	2.51438	0.011924	0.0299257	HOXC13-AS	lncRNA
ENSG00000249690.1	0.869642	1.13494	0.355018	3.19684	0.00138941	0.0047884	AC110813.1	lncRNA
ENSG00000249715.12	10.8246	1.13304	0.173209	6.54149	6.0909e-11	1.29052e-09	FER1L5	protein_coding
ENSG00000249763.1	1.69016	1.38805	0.277004	5.01093	5.41673e-07	4.71809e-06	AC114786.1	processed_pseudogene
ENSG00000249849.1	1.43552	1.18019	0.286944	4.11296	3.90621e-05	0.000210296	AC138819.1	lncRNA
ENSG00000249885.1	0.771235	1.49364	0.368939	4.04848	5.15504e-05	0.000268043	ARHGEF38-IT1	lncRNA
ENSG00000250043.1	0.982609	2.30496	0.657587	3.50518	0.000456292	0.00182074	AC106895.1	lncRNA
ENSG00000250060.2	17.8371	1.11977	0.411946	2.71825	0.00656288	0.0180689	AC122710.1	lncRNA
ENSG00000250081.1	3.42698	1.34865	0.180877	7.45615	8.90905e-14	3.23536e-12	AC025176.1	lncRNA
ENSG00000250101.1	0.779046	1.10483	0.447057	2.47133	0.0134611	0.033153	AC106795.3	lncRNA
ENSG00000250250.2	3.15782	1.37187	0.575581	2.38345	0.0171511	0.0406151	CTD-2350J17.1	lncRNA
ENSG00000250358.6	19.547	1.67187	0.441214	3.78926	0.000151097	0.00068707	LINC02200	lncRNA
ENSG00000250420.8	6.94357	2.67597	0.422635	6.33163	2.42585e-10	4.54826e-09	AACSP1	transcribed_unprocessed_pseudogene
ENSG00000250447.6	1.44933	1.35787	0.481692	2.81896	0.004818	0.0139184	LINC02105	lncRNA
ENSG00000250453.2	5.68747	1.82981	0.427065	4.28461	1.83063e-05	0.000107889	AC008825.1	lncRNA
ENSG00000250514.1	1.2884	1.25394	0.415955	3.01461	0.00257311	0.00810736	LINC02125	lncRNA
ENSG00000250546.6	1.83819	1.34092	0.503094	2.66534	0.00769101	0.020669	AC079160.1	lncRNA
ENSG00000250612.2	47.1371	1.41899	0.364411	3.89393	9.86317e-05	0.000474448	AC114786.2	processed_pseudogene
ENSG00000250658.1	4.57037	1.39202	0.363493	3.82958	0.000128364	0.000596571	AC097652.1	lncRNA
ENSG00000250682.6	12.9628	1.26089	0.453146	2.78253	0.00539365	0.0153057	LINC00491	lncRNA
ENSG00000250708.2	4.04334	1.90326	0.533822	3.56535	0.000363371	0.00149078	LINC02269	lncRNA
ENSG00000250726.1	4.84444	1.0472	0.23178	4.51807	6.24071e-06	4.1624e-05	AC107222.1	processed_pseudogene
ENSG00000250735.5	0.81654	1.49059	0.437321	3.40847	0.000653289	0.00248754	AC096759.2	lncRNA
ENSG00000250742.4	138.126	1.06855	0.199292	5.36174	8.24259e-08	8.71605e-07	LINC02381	lncRNA
ENSG00000250771.2	4.35579	1.01781	0.228081	4.46248	8.10163e-06	5.24973e-05	AC106865.1	transcribed_unprocessed_pseudogene
ENSG00000250775.2	1.91198	1.16067	0.439142	2.64303	0.0082167	0.0218521	AC093730.1	lncRNA
ENSG00000250874.1	7.33467	1.71427	0.387375	4.42535	9.62851e-06	6.12507e-05	AC010595.1	lncRNA
ENSG00000251127.2	0.724854	1.82075	0.451457	4.03304	5.50588e-05	0.000284062	AC091173.1	lncRNA
ENSG00000251199.6	13.9276	1.12644	0.308303	3.65367	0.000258523	0.00110363	AC015631.1	lncRNA
ENSG00000251273.4	24.6106	1.56131	0.379841	4.11043	3.94924e-05	0.000212249	LINC02228	lncRNA
ENSG00000251297.1	0.560925	1.03279	0.343663	3.00523	0.0026538	0.00832819	TUBB7P	unprocessed_pseudogene
ENSG00000251303.1	1.20415	1.84672	0.246705	7.48555	7.12464e-14	2.62881e-12	CAB39P1	processed_pseudogene
ENSG00000251487.1	0.770075	1.7789	0.655269	2.71477	0.00663219	0.0182234	AC106744.2	lncRNA
ENSG00000251493.5	2.26765	1.36809	0.332499	4.11456	3.87912e-05	0.000209036	FOXD1	protein_coding
ENSG00000251497.2	4.20398	1.05818	0.395051	2.67858	0.00739344	0.019989	PITPNM2-AS1	lncRNA
ENSG00000251529.1	1.36403	1.32358	0.383363	3.45254	0.000555334	0.00216004	AC021146.11	unprocessed_pseudogene
ENSG00000251555.1	0.710571	1.09029	0.300336	3.63024	0.00028316	0.00119609	AC096711.2	lncRNA
ENSG00000251608.2	0.66555	1.6321	0.610747	2.6723	0.00753333	0.0203037	OR12D1	polymorphic_pseudogene
ENSG00000251611.1	1.78108	1.18128	0.225509	5.23827	1.62092e-07	1.59533e-06	FAM160A1-DT	lncRNA
ENSG00000251623.2	2.3253	1.11689	0.345297	3.23458	0.00121821	0.00427691	AC139491.5	transcribed_processed_pseudogene
ENSG00000251676.2	12.1711	2.5709	0.327357	7.8535	4.04598e-15	1.88485e-13	SNHG27	lncRNA
ENSG00000251985.1	1.16013	1.56272	0.424346	3.68264	0.000230828	0.000997483	RNU6-1161P	snRNA
ENSG00000252950.1	0.726532	1.13037	0.246304	4.58931	4.44703e-06	3.07658e-05	RNA5SP490	rRNA_pseudogene
ENSG00000253361.3	3.39303	1.01588	0.333555	3.04562	0.00232198	0.0074238	AC069120.1	lncRNA
ENSG00000253417.5	14.9391	1.89039	0.329595	5.7355	9.72247e-09	1.27623e-07	LINC02159	lncRNA
ENSG00000253467.2	1.07064	1.92566	0.433827	4.43877	9.0475e-06	5.79067e-05	IGHV7-40	IG_V_pseudogene
ENSG00000253524.1	1.213	1.9412	0.663528	2.92557	0.00343821	0.0104178	AC124290.2	lncRNA
ENSG00000253554.7	1.23984	1.45838	0.612326	2.38171	0.0172324	0.0407853	LINC01414	lncRNA
ENSG00000253569.1	1.31843	1.7564	0.488561	3.59505	0.000324332	0.00134726	VENTXP5	processed_pseudogene
ENSG00000253583.1	0.586034	1.19126	0.503031	2.36815	0.0178771	0.0420918	AC018953.1	lncRNA
ENSG00000253616.5	18.7659	1.23591	0.1755	7.04222	1.89197e-12	5.45419e-11	AC107959.3	lncRNA
ENSG00000253642.6	23.1922	1.62889	0.457698	3.55888	0.000372443	0.00152311	AF279873.3	lncRNA
ENSG00000253659.2	1.09389	1.2728	0.389991	3.26366	0.00109985	0.00391067	AC138646.1	lncRNA
ENSG00000253665.1	0.463161	1.15564	0.450198	2.56696	0.0102596	0.0263536	LINC02866	lncRNA
ENSG00000253706.5	18.0564	1.49906	0.44451	3.37239	0.000745175	0.00278944	AC011632.1	lncRNA
ENSG00000253816.3	1.65632	1.13828	0.296345	3.84105	0.000122509	0.000573226	GUSBP14	unprocessed_pseudogene
ENSG00000253868.4	2.58746	1.20393	0.429805	2.8011	0.00509289	0.0145856	FER1L6-AS2	lncRNA
ENSG00000253931.1	18.4423	1.24072	0.338261	3.66795	0.000244505	0.0010508	AC105118.1	lncRNA
ENSG00000253974.6	1.13569	1.83616	0.442754	4.14714	3.36656e-05	0.000184523	NRG1-IT1	lncRNA
ENSG00000253998.3	17.9682	1.74746	0.412384	4.23745	2.2607e-05	0.000129823	IGKV2-29	IG_V_pseudogene
ENSG00000254027.1	2.84906	1.12792	0.201174	5.60671	2.06214e-08	2.51378e-07	AC009902.2	lncRNA
ENSG00000254057.1	0.477508	1.26402	0.436551	2.89546	0.00378602	0.011306	AC084346.1	lncRNA
ENSG00000254119.5	0.811102	1.17955	0.37	3.18797	0.00143274	0.0049147	LINC02842	lncRNA
ENSG00000254126.8	3.24573	1.96368	0.315285	6.22827	4.71616e-10	8.35696e-09	CD8B2	protein_coding
ENSG00000254266.6	2.33522	1.9186	0.338652	5.6654	1.46685e-08	1.85225e-07	PKIA-AS1	lncRNA
ENSG00000254302.2	1.22664	1.32932	0.49377	2.69219	0.00709835	0.0193137	AC087855.2	lncRNA
ENSG00000254369.6	2.12895	1.19097	0.2856	4.17005	3.04535e-05	0.000168359	HOXA-AS3	lncRNA
ENSG00000254394.2	2.66512	1.20884	0.421069	2.87089	0.00409321	0.0121092	AC060765.2	lncRNA
ENSG00000254454.2	1.07754	1.53664	0.247858	6.19966	5.65859e-10	9.86e-09	RCC2P6	processed_pseudogene
ENSG00000254518.1	0.69946	1.56884	0.672851	2.33163	0.0197201	0.0455828	LINC02750	lncRNA
ENSG00000254560.6	17.7556	1.40598	0.326867	4.30139	1.69733e-05	0.000101032	BBOX1-AS1	lncRNA
ENSG00000254656.3	7.70354	2.59171	0.374122	6.92744	4.28529e-12	1.13321e-10	RTL1	protein_coding
ENSG00000254722.1	0.734838	1.43319	0.480535	2.98249	0.00285917	0.00887989	FAM8A2P	unprocessed_pseudogene
ENSG00000254726.3	318.883	1.16059	0.128027	9.06522	1.24351e-19	1.12131e-17	MEX3A	protein_coding
ENSG00000254768.6	0.934339	1.68361	0.338061	4.98019	6.35226e-07	5.44641e-06	AC104009.1	lncRNA
ENSG00000254840.1	1.2203	2.09248	0.689517	3.03471	0.00240771	0.00765395	AC024405.2	transcribed_unprocessed_pseudogene
ENSG00000254874.1	3.12484	2.23315	0.621007	3.59602	0.000323124	0.00134289	AP003171.1	lncRNA
ENSG00000255042.3	23.4979	2.51368	0.617758	4.06903	4.72094e-05	0.000248313	AC109635.2	transcribed_unprocessed_pseudogene
ENSG00000255065.1	0.75569	2.10796	0.728195	2.89478	0.00379427	0.0113277	AP002001.2	processed_pseudogene
ENSG00000255082.1	0.863916	1.72182	0.483123	3.56394	0.000365327	0.00149792	GRM5-AS1	lncRNA
ENSG00000255099.1	0.495265	1.75039	0.709975	2.46542	0.0136853	0.0335964	AC023245.2	processed_pseudogene
ENSG00000255127.3	0.828649	2.62076	0.738824	3.54721	0.000389332	0.00158449	AP003171.2	transcribed_unprocessed_pseudogene
ENSG00000255193.1	0.489651	1.53837	0.502138	3.06364	0.0021866	0.00706092	LINC02726	lncRNA
ENSG00000255293.1	0.641152	1.71648	0.459944	3.73193	0.000190017	0.000840583	WIZP1	processed_pseudogene
ENSG00000255345.1	0.736093	1.64193	0.412276	3.98261	6.81624e-05	0.000342957	AP002957.1	lncRNA
ENSG00000255372.1	0.510847	1.76643	0.6122	2.88538	0.00390941	0.0116332	AC107886.1	lncRNA
ENSG00000255408.4	7.88965	1.96306	0.275704	7.12017	1.0779e-12	3.25121e-11	PCDHA3	protein_coding
ENSG00000255425.6	1.39887	1.82957	0.493079	3.7105	0.000206848	0.00090564	OR8G3P	polymorphic_pseudogene
ENSG00000255442.1	1.1145	2.19494	0.542482	4.04611	5.20763e-05	0.00027031	AC109635.3	unprocessed_pseudogene
ENSG00000255446.1	2.82538	1.73229	0.272296	6.36179	1.99413e-10	3.80704e-09	AP003064.2	lncRNA
ENSG00000255474.1	1.78899	1.23383	0.257742	4.78709	1.69214e-06	1.30475e-05	GAU1	lncRNA
ENSG00000255501.3	18.1725	1.07607	0.368661	2.91885	0.00351323	0.0106096	CARD18	protein_coding
ENSG00000255624.3	11.1234	1.27759	0.181985	7.02031	2.21376e-12	6.24626e-11	C10orf88B	transcribed_processed_pseudogene
ENSG00000255639.3	0.886534	1.08043	0.314641	3.43387	0.000595037	0.00229099	AC005833.1	protein_coding
ENSG00000255666.7	3.2119	1.54652	0.415798	3.71939	0.000199701	0.000878471	LINC02700	lncRNA
ENSG00000255693.3	1.50052	1.13288	0.339358	3.33831	0.000842882	0.00310703	LINC02389	lncRNA
ENSG00000255970.1	2.12517	1.02296	0.219231	4.66614	3.06903e-06	2.21001e-05	LINC02421	lncRNA
ENSG00000256008.3	0.670042	1.17128	0.352325	3.32442	0.000886028	0.0032422	AC125616.1	lncRNA
ENSG00000256081.2	1.9128	1.77354	0.66303	2.6749	0.0074752	0.0201769	AC243972.2	processed_pseudogene
ENSG00000256151.1	5.21271	2.11695	0.524703	4.03456	5.47036e-05	0.000282531	ADGRD1-AS1	lncRNA
ENSG00000256209.2	0.695844	1.05354	0.44187	2.38428	0.0171126	0.0405435	AC073578.1	lncRNA
ENSG00000256229.8	71.8714	1.60639	0.159151	10.0935	5.90193e-24	8.15316e-22	ZNF486	protein_coding
ENSG00000256436.1	1.28247	1.02451	0.202308	5.06413	4.1027e-07	3.68506e-06	TAS2R31	protein_coding
ENSG00000256564.1	1.19915	1.30702	0.21845	5.98317	2.1884e-09	3.34418e-08	AC007552.2	lncRNA
ENSG00000256574.8	2.96411	1.66515	0.307847	5.40902	6.33706e-08	6.88013e-07	OR13A1	protein_coding
ENSG00000256663.1	10.7535	2.10106	0.16251	12.9288	3.09639e-38	1.00884e-35	AC112777.1	processed_pseudogene
ENSG00000256673.1	8.93789	1.3815	0.170852	8.08599	6.16622e-16	3.32745e-14	AC141557.1	unprocessed_pseudogene
ENSG00000257084.1	1.53106	2.66759	0.470382	5.67111	1.41879e-08	1.80079e-07	MIR200CHG	lncRNA
ENSG00000257127.6	0.850312	1.07191	0.355382	3.01621	0.00255954	0.00807051	CLLU1	lncRNA
ENSG00000257185.2	5.37784	1.10913	0.35828	3.09571	0.00196344	0.00643108	LINC02293	lncRNA
ENSG00000257302.1	0.367082	1.03288	0.397721	2.59699	0.00940453	0.0245165	FAHD2P1	processed_pseudogene
ENSG00000257446.4	5.49768	1.03456	0.168696	6.13266	8.64227e-10	1.44467e-08	ZNF878	protein_coding
ENSG00000257611.1	0.59399	1.51651	0.359539	4.21793	2.46556e-05	0.000139981	AC010182.1	processed_pseudogene
ENSG00000257636.6	10.1647	1.31012	0.439283	2.98239	0.00286004	0.00888178	G2E3-AS1	lncRNA
ENSG00000257642.1	1.32479	2.11953	0.321112	6.60059	4.09528e-11	8.97427e-10	KCCAT198	lncRNA
ENSG00000257657.3	0.892378	1.07071	0.330376	3.24087	0.00119163	0.00419899	AC079950.1	lncRNA
ENSG00000257743.8	58.6935	2.43553	0.32585	7.47439	7.75619e-14	2.84966e-12	MGAM2	protein_coding
ENSG00000257803.2	0.526532	1.36873	0.236671	5.78327	7.3264e-09	9.92253e-08	PIGAP1	processed_pseudogene
ENSG00000257954.1	1.77586	1.21206	0.181092	6.69303	2.18593e-11	5.09057e-10	AC125611.2	processed_pseudogene
ENSG00000258028.3	5.0988	1.10516	0.375405	2.94391	0.00324092	0.00989218	AL135878.1	lncRNA
ENSG00000258038.6	11.406	1.68908	0.395471	4.27106	1.94545e-05	0.000113839	LINC02327	lncRNA
ENSG00000258065.1	1.58394	1.88642	0.428906	4.39822	1.09145e-05	6.81879e-05	AL122126.1	processed_pseudogene
ENSG00000258123.1	0.642808	1.52609	0.400751	3.80809	0.000140044	0.000643246	LINC02444	lncRNA
ENSG00000258227.7	24.4472	1.0135	0.201813	5.022	5.11351e-07	4.47769e-06	CLEC5A	protein_coding
ENSG00000258240.6	1.16136	1.57325	0.364353	4.31794	1.57495e-05	9.46449e-05	AC002351.1	lncRNA
ENSG00000258279.4	0.879987	1.21325	0.318676	3.80716	0.000140574	0.00064525	LINC00592	lncRNA
ENSG00000258314.3	2.83393	1.51636	0.358686	4.22754	2.36265e-05	0.000135094	AL589182.1	lncRNA
ENSG00000258320.1	4.45571	1.58255	0.442232	3.57856	0.000345489	0.00142554	AC090502.3	processed_pseudogene
ENSG00000258334.1	0.865019	1.63865	0.230642	7.10475	1.20543e-12	3.59196e-11	AC125611.4	lncRNA
ENSG00000258405.11	26.9217	1.61916	0.171097	9.46339	2.98125e-21	3.30001e-19	ZNF578	protein_coding
ENSG00000258525.2	2.73316	1.10141	0.230517	4.77801	1.77037e-06	1.35779e-05	AL049830.3	lncRNA
ENSG00000258545.6	22.8833	1.02119	0.214751	4.75523	1.98218e-06	1.50091e-05	RHOXF1-AS1	lncRNA
ENSG00000258592.1	1.04789	1.17876	0.442383	2.66457	0.00770864	0.0207115	AL391152.1	lncRNA
ENSG00000258609.3	4.69678	1.43363	0.289304	4.95544	7.21668e-07	6.10123e-06	LINC-ROR	lncRNA
ENSG00000258743.6	1.69321	1.2161	0.411352	2.95635	0.00311299	0.00955308	LINC02301	lncRNA
ENSG00000258754.8	5.99777	1.669	0.428624	3.89385	9.86669e-05	0.000474524	LINC01579	lncRNA
ENSG00000258763.5	1.61395	2.52423	0.494025	5.10953	3.22969e-07	2.96335e-06	AC122685.1	lncRNA
ENSG00000258777.1	1.28084	1.09439	0.227676	4.80679	1.53369e-06	1.19458e-05	HIF1A-AS1	lncRNA
ENSG00000258793.1	55.3096	1.07974	0.22351	4.83085	1.35953e-06	1.07173e-05	AL355102.4	lncRNA
ENSG00000258806.2	0.599427	1.03271	0.336933	3.06505	0.00217636	0.00703572	OR11H7	polymorphic_pseudogene
ENSG00000258815.1	5.33647	1.69467	0.388495	4.36214	1.28798e-05	7.8994e-05	LINC02820	lncRNA
ENSG00000258837.1	8.92774	1.84493	0.361442	5.10436	3.31908e-07	3.0373e-06	AL133370.1	lncRNA
ENSG00000258927.2	4.43598	2.00458	0.390286	5.13618	2.80377e-07	2.61776e-06	AL133467.2	lncRNA
ENSG00000258947.7	3.40934	1.33005	0.249057	5.34033	9.27794e-08	9.68631e-07	TUBB3	protein_coding
ENSG00000258986.7	23.5914	1.08084	0.383287	2.81992	0.00480357	0.0138848	TMEM179	protein_coding
ENSG00000259092.1	17.4684	1.17633	0.323718	3.6338	0.000279279	0.00118157	TRAV30	TR_V_gene
ENSG00000259129.6	25.4274	1.66096	0.441766	3.75981	0.00017004	0.000762067	LINC00648	lncRNA
ENSG00000259156.7	0.875144	1.74442	0.487132	3.58099	0.000342296	0.00141338	CHEK2P2	transcribed_unprocessed_pseudogene
ENSG00000259306.2	0.651642	1.71027	0.517078	3.30757	0.0009411	0.00341729	AC020891.2	lncRNA
ENSG00000259342.1	5.48668	2.0193	0.287658	7.01982	2.22162e-12	6.26334e-11	AC025580.1	lncRNA
ENSG00000259353.1	11.1515	1.05765	0.268012	3.9463	7.93695e-05	0.000391698	AC090515.4	lncRNA
ENSG00000259354.5	2.14424	1.18885	0.214982	5.53001	3.20214e-08	3.74118e-07	AC025580.2	lncRNA
ENSG00000259380.6	0.84462	1.62363	0.304994	5.32346	1.01812e-07	1.05338e-06	AC087473.1	lncRNA
ENSG00000259425.5	1.08044	1.47401	0.335486	4.39364	1.11467e-05	6.94752e-05	AC011767.1	transcribed_unprocessed_pseudogene
ENSG00000259430.2	17.3609	1.02879	0.353062	2.91392	0.00356918	0.0107542	CERS3-AS1	lncRNA
ENSG00000259436.1	57.9369	2.08614	0.237549	8.78192	1.60703e-18	1.27003e-16	AC010247.2	lncRNA
ENSG00000259459.6	2.61545	1.11493	0.296818	3.75626	0.000172474	0.000771977	LINC02568	lncRNA
ENSG00000259485.2	12.3251	2.34966	0.408053	5.75822	8.50075e-09	1.12916e-07	LINC02253	lncRNA
ENSG00000259495.3	27.4825	1.80883	0.287699	6.28723	3.23177e-10	5.89606e-09	AC016705.2	lncRNA
ENSG00000259514.1	0.89386	2.04459	0.444268	4.60216	4.18141e-06	2.91382e-05	AC027243.1	lncRNA
ENSG00000259518.2	0.816803	1.36061	0.389277	3.49524	0.000473644	0.00188107	LINC01583	lncRNA
ENSG00000259616.2	3.23048	1.037	0.289298	3.58455	0.000337659	0.00139691	AC104574.2	lncRNA
ENSG00000259664.3	1.11929	1.63818	0.449606	3.64359	0.000268858	0.00114266	LINC02254	lncRNA
ENSG00000259674.1	38.6401	1.07452	0.197118	5.45118	5.00361e-08	5.58515e-07	AC092868.1	processed_pseudogene
ENSG00000259675.2	0.950218	1.23802	0.375181	3.2998	0.000967534	0.00349929	AC018618.1	lncRNA
ENSG00000259683.1	4.32655	1.58016	0.242583	6.51391	7.32206e-11	1.5261e-09	AC243562.2	unprocessed_pseudogene
ENSG00000259712.1	19.0367	2.18426	0.22575	9.67557	3.8294e-22	4.6081e-20	AC023906.5	lncRNA
ENSG00000259744.1	1.04575	1.5248	0.289528	5.26652	1.39034e-07	1.39058e-06	AC009269.4	lncRNA
ENSG00000259755.1	1.99574	1.07387	0.279651	3.84006	0.000123007	0.000575475	AC090907.2	lncRNA
ENSG00000259786.7	21.7655	1.51788	0.377833	4.01732	5.8863e-05	0.000301348	LINC02109	lncRNA
ENSG00000259793.1	0.773085	1.13945	0.225194	5.05988	4.19528e-07	3.75067e-06	AC013726.1	lncRNA
ENSG00000259845.1	1.47938	1.0071	0.195985	5.13866	2.76702e-07	2.58765e-06	HERC2P10	unprocessed_pseudogene
ENSG00000259846.1	0.852421	1.75267	0.565662	3.09845	0.00194538	0.0063816	AC092131.1	lncRNA
ENSG00000259848.9	1.11996	1.6603	0.406672	4.08264	4.4527e-05	0.000235784	AC097374.1	transcribed_unprocessed_pseudogene
ENSG00000259882.2	0.48008	1.07454	0.426121	2.52168	0.0116795	0.0294103	AC142384.1	unprocessed_pseudogene
ENSG00000259897.2	2.80285	2.64197	0.646163	4.08871	4.33772e-05	0.000230686	FRG2JP	unprocessed_pseudogene
ENSG00000259920.1	0.973617	1.06269	0.282806	3.75766	0.000171509	0.000767954	AC007938.1	lncRNA
ENSG00000259995.1	0.916869	1.07735	0.446116	2.41495	0.0157376	0.0377938	AC106729.1	lncRNA
ENSG00000260019.2	2.50946	1.2288	0.453194	2.71143	0.00669945	0.0183804	LINC01992	lncRNA
ENSG00000260073.2	0.76452	2.00823	0.733315	2.73857	0.00617071	0.0171698	AC023824.1	lncRNA
ENSG00000260141.1	0.365594	1.07559	0.452093	2.37915	0.0173527	0.0410167	AC145350.2	lncRNA
ENSG00000260192.3	0.964035	1.08534	0.367031	2.95707	0.00310574	0.0095359	LINC02240	lncRNA
ENSG00000260230.5	62.56	1.37893	0.309997	4.4482	8.65942e-06	5.56217e-05	FRRS1L	protein_coding
ENSG00000260232.3	0.761935	1.85563	0.512243	3.62255	0.000291711	0.0012274	PWRN4	lncRNA
ENSG00000260265.1	8.5894	1.24592	0.378354	3.29301	0.000991201	0.00357081	LINC02562	lncRNA
ENSG00000260289.2	24.2559	1.13552	0.292676	3.87977	0.000104555	0.000499506	AC093515.1	lncRNA
ENSG00000260604.2	74.6694	1.0922	0.204567	5.33908	9.34174e-08	9.74408e-07	AL590004.3	lncRNA
ENSG00000260644.6	2.12544	1.33565	0.302448	4.41613	1.00484e-05	6.35011e-05	HERC2P5	transcribed_unprocessed_pseudogene
ENSG00000260761.1	4.32593	1.31718	0.497285	2.64874	0.0080792	0.0215429	AC106754.1	lncRNA
ENSG00000260763.1	0.985556	1.58037	0.476235	3.31846	0.000905153	0.00330079	AC106799.3	lncRNA
ENSG00000260777.1	1.49936	1.24544	0.272877	4.56413	5.01578e-06	3.42274e-05	AC061975.1	lncRNA
ENSG00000260930.2	3.69468	1.81796	0.389208	4.67092	2.99852e-06	2.16646e-05	LINC01416	lncRNA
ENSG00000260958.3	1.36648	1.72335	0.532043	3.23912	0.00119899	0.00422189	AC023824.3	lncRNA
ENSG00000260978.1	1.00968	1.14957	0.307553	3.73779	0.000185645	0.000823882	AC126407.1	lncRNA
ENSG00000260989.1	0.686131	1.01566	0.321373	3.16038	0.00157564	0.00533285	AL133297.2	lncRNA
ENSG00000261010.1	3.73065	1.45754	0.598179	2.43662	0.0148252	0.0359173	RARRES2P6	processed_pseudogene
ENSG00000261060.1	1.11545	1.02023	0.315861	3.22999	0.00123796	0.0043348	AL160286.2	lncRNA
ENSG00000261068.2	9.11664	2.35698	0.253942	9.28157	1.67001e-20	1.68641e-18	AL512274.1	lncRNA
ENSG00000261183.5	30.7681	1.01738	0.261595	3.88916	0.000100593	0.000482579	SPINT1-AS1	lncRNA
ENSG00000261296.1	2.32436	1.18559	0.317177	3.73794	0.000185531	0.00082348	AC126323.6	lncRNA
ENSG00000261411.1	2.07781	1.27337	0.33421	3.81009	0.000138916	0.00063934	AL161938.1	lncRNA
ENSG00000261437.1	8.208	2.68481	0.400437	6.7047	2.01814e-11	4.73257e-10	AC108860.2	lncRNA
ENSG00000261488.1	7.46653	2.1183	0.303983	6.96849	3.20359e-12	8.70491e-11	TBILA	lncRNA
ENSG00000261502.4	3.59176	1.37372	0.512092	2.68256	0.00730612	0.0197932	AC040174.1	lncRNA
ENSG00000261514.1	0.92123	2.2478	0.426583	5.26931	1.36936e-07	1.37159e-06	LINC01976	lncRNA
ENSG00000261520.5	2.00473	1.68835	0.545564	3.09469	0.00197017	0.00644825	DLGAP1-AS5	lncRNA
ENSG00000261599.6	0.877304	1.05378	0.281056	3.74935	0.000177296	0.000791096	HERC2P8	transcribed_unprocessed_pseudogene
ENSG00000261606.5	0.472018	1.13031	0.407483	2.77388	0.00553925	0.0156498	AC091230.1	lncRNA
ENSG00000261634.4	6.88495	1.94761	0.255704	7.61665	2.60339e-14	1.04063e-12	AC026992.2	lncRNA
ENSG00000261761.5	17.5548	1.798	0.429876	4.18259	2.88203e-05	0.000160332	LINC02616	lncRNA
ENSG00000261762.1	4.55157	1.08032	0.205676	5.25252	1.50031e-07	1.48978e-06	AC027228.2	lncRNA
ENSG00000261787.2	2.70651	1.58212	0.396582	3.9894	6.624e-05	0.000334503	TCF24	protein_coding
ENSG00000261800.2	3.35904	3.23352	0.558527	5.78937	7.06519e-09	9.60265e-08	AC023824.5	lncRNA
ENSG00000261949.6	1.93431	1.62334	0.324714	4.99928	5.75442e-07	4.9822e-06	GFY	protein_coding
ENSG00000262406.3	95.9666	1.72874	0.278046	6.21745	5.05297e-10	8.88994e-09	MMP12	protein_coding
ENSG00000262703.1	1.83756	1.46601	0.210387	6.96814	3.21167e-12	8.71999e-11	AC009121.2	lncRNA
ENSG00000262904.1	4.32834	1.21261	0.149686	8.10103	5.44939e-16	2.97785e-14	TMPOP2	processed_pseudogene
ENSG00000263154.1	0.658995	1.29369	0.376411	3.43692	0.000588374	0.00226964	AC110285.3	lncRNA
ENSG00000263325.1	0.856479	1.42374	0.548635	2.59506	0.00945741	0.0246339	AC003965.2	lncRNA
ENSG00000263513.5	13.5572	1.25035	0.146507	8.53441	1.40867e-17	9.73e-16	FAM72C	protein_coding
ENSG00000263551.6	1.4393	1.62952	0.310277	5.25182	1.50604e-07	1.49505e-06	AP000829.1	lncRNA
ENSG00000263567.1	0.68536	1.68605	0.702599	2.39974	0.0164068	0.0391154	AC007923.1	lncRNA
ENSG00000263612.1	1.98811	1.51112	0.268487	5.62828	1.82018e-08	2.24908e-07	AF186192.3	lncRNA
ENSG00000263745.7	7.8457	1.92027	0.276628	6.9417	3.87409e-12	1.03557e-10	AP005230.1	lncRNA
ENSG00000263893.2	2.59652	1.37441	0.36319	3.78426	0.000154165	0.000698902	AC080037.2	lncRNA
ENSG00000264148.1	5.34051	1.03635	0.184766	5.609	2.03497e-08	2.48338e-07	AC138207.3	processed_pseudogene
ENSG00000264188.1	2.916	1.1294	0.175314	6.44215	1.17793e-10	2.35151e-09	AC106037.2	lncRNA
ENSG00000264230.9	5.23524	1.08276	0.341011	3.17514	0.00149766	0.00510536	ANXA8L1	protein_coding
ENSG00000264260.2	1.46096	1.10586	0.3776	2.92866	0.00340424	0.0103257	LINC01893	lncRNA
ENSG00000264370.1	1.69137	1.19726	0.365091	3.27935	0.00104045	0.0037248	MIR3125	miRNA
ENSG00000264693.1	0.588284	1.96002	0.614289	3.19071	0.00141922	0.00487752	AC123786.1	lncRNA
ENSG00000265046.1	1.68217	1.68037	0.239413	7.01872	2.23902e-12	6.29697e-11	AC004253.2	lncRNA
ENSG00000265060.2	1.14608	2.62219	0.676284	3.87735	0.0001056	0.000503729	PPY2P	transcribed_unprocessed_pseudogene
ENSG00000265417.1	3.87902	1.5003	0.278087	5.39508	6.84929e-08	7.38587e-07	AP005119.2	processed_pseudogene
ENSG00000265646.2	2.48736	1.06747	0.272241	3.92103	8.8171e-05	0.000429974	TUFMP1	processed_pseudogene
ENSG00000265717.1	2.71148	1.32536	0.357462	3.7077	0.000209152	0.000914455	AC103808.3	lncRNA
ENSG00000265763.4	5.14808	1.28398	0.22084	5.81407	6.0972e-09	8.37268e-08	ZNF488	protein_coding
ENSG00000265766.3	0.770918	1.23046	0.29228	4.20986	2.55526e-05	0.000144494	CXADRP3	transcribed_processed_pseudogene
ENSG00000265790.1	0.629316	1.66193	0.612363	2.71396	0.0066485	0.0182556	RNASEH1P1	processed_pseudogene
ENSG00000265933.5	18.9149	1.29724	0.392966	3.30116	0.000962866	0.00348533	LINC00668	lncRNA
ENSG00000265962.1	1.16593	1.21635	0.51071	2.38168	0.0172337	0.0407855	GACAT2	lncRNA
ENSG00000265980.1	1.31616	1.54467	0.532991	2.89811	0.00375414	0.0112205	AC074237.1	lncRNA
ENSG00000265994.2	0.631906	1.78891	0.774919	2.30851	0.020971	0.048037	AC090365.1	lncRNA
ENSG00000266014.2	1.05248	1.27937	0.397536	3.21824	0.00128979	0.00448746	AC103808.4	lncRNA
ENSG00000266369.1	1.3047	1.35959	0.516137	2.63418	0.0084342	0.0223343	AC090774.2	lncRNA
ENSG00000266401.2	6.33852	1.13001	0.379386	2.97853	0.00289633	0.00897674	AP002478.1	lncRNA
ENSG00000266446.1	0.659438	1.00038	0.263649	3.79439	0.00014801	0.000675163	AL449423.1	lncRNA
ENSG00000266479.1	0.58332	1.04364	0.358818	2.90854	0.00363121	0.0109107	AC105245.1	processed_pseudogene
ENSG00000266524.3	41.2898	1.16266	0.333659	3.48456	0.000492941	0.00194941	GDF10	protein_coding
ENSG00000266604.1	0.425444	1.1609	0.426887	2.71946	0.00653889	0.0180156	LINC01887	lncRNA
ENSG00000266743.1	1.5827	1.39367	0.44305	3.14561	0.00165739	0.00556157	AC103808.6	lncRNA
ENSG00000266830.1	9.50715	2.36956	0.495226	4.7848	1.7116e-06	1.31816e-05	AC061975.6	lncRNA
ENSG00000266869.2	2.83785	2.68245	0.436002	6.15238	7.63278e-10	1.28966e-08	AC005993.1	lncRNA
ENSG00000267015.1	13.1708	1.3237	0.339073	3.90388	9.46627e-05	0.000457689	AC023090.1	lncRNA
ENSG00000267060.7	8.45627	1.12411	0.150047	7.49172	6.79784e-14	2.51899e-12	PTGES3L	protein_coding
ENSG00000267073.1	1.13627	1.65947	0.501685	3.3078	0.00094032	0.00341481	AC005256.1	lncRNA
ENSG00000267134.3	1.361	1.98074	0.376382	5.26258	1.4205e-07	1.41828e-06	LINC01924	lncRNA
ENSG00000267142.1	0.973066	1.11591	0.316718	3.52335	0.000426128	0.00171504	AC092296.3	processed_pseudogene
ENSG00000267150.1	1.67368	1.06179	0.200606	5.29293	1.20371e-07	1.22161e-06	AC006557.1	lncRNA
ENSG00000267260.2	4.99402	1.50784	0.239968	6.28352	3.30989e-10	6.02743e-09	AC020928.1	lncRNA
ENSG00000267284.2	12.3357	1.73232	0.475819	3.64071	0.000271887	0.00115397	AC022031.2	lncRNA
ENSG00000267327.2	17.0858	2.02026	0.357661	5.64853	1.61821e-08	2.02268e-07	AC009271.1	lncRNA
ENSG00000267374.2	29.7601	1.85427	0.218318	8.49342	2.00639e-17	1.35602e-15	MIR924HG	lncRNA
ENSG00000267383.7	12.8149	1.39635	0.152172	9.17611	4.4695e-20	4.24062e-18	AC011447.3	lncRNA
ENSG00000267389.2	0.764426	1.93609	0.645923	2.99739	0.00272298	0.00851405	AC006504.4	unprocessed_pseudogene
ENSG00000267413.1	2.86533	1.74188	0.409993	4.24856	2.1515e-05	0.000124109	LINC01901	lncRNA
ENSG00000267432.6	1.97191	1.05661	0.271383	3.89342	9.88415e-05	0.000475166	DNAH17-AS1	lncRNA
ENSG00000267714.2	1.23138	1.26202	0.277462	4.54844	5.40446e-06	3.66264e-05	AC008738.4	lncRNA
ENSG00000267733.5	3.07195	1.03466	0.251383	4.11589	3.85691e-05	0.000208064	AP005264.4	transcribed_processed_pseudogene
ENSG00000267750.6	3.51829	1.08521	0.189859	5.7159	1.09123e-08	1.4168e-07	RUNDC3A-AS1	lncRNA
ENSG00000267795.6	17.5194	1.69841	0.279446	6.07775	1.21878e-09	1.97893e-08	SMIM22	protein_coding
ENSG00000267886.1	4.166	2.37876	0.302397	7.86633	3.65192e-15	1.72064e-13	AC074135.1	lncRNA
ENSG00000267920.1	0.379863	1.02146	0.402848	2.5356	0.0112255	0.0284623	SNX6P1	processed_pseudogene
ENSG00000267943.1	0.713517	1.29644	0.280509	4.62174	3.80541e-06	2.67611e-05	AC010328.1	lncRNA
ENSG00000268038.3	0.716969	2.10615	0.59047	3.5669	0.000361232	0.00148341	LINC01785	lncRNA
ENSG00000268041.2	11.2492	1.23087	0.231124	5.3256	1.0062e-07	1.04167e-06	ERFL	protein_coding
ENSG00000268088.1	1.14014	1.93593	0.425257	4.55237	5.30443e-06	3.59909e-05	AC093063.1	transcribed_unprocessed_pseudogene
ENSG00000268089.3	17.3341	1.12747	0.191629	5.8836	4.01448e-09	5.74333e-08	GABRQ	protein_coding
ENSG00000268104.3	13.213	2.79814	0.376057	7.44073	1.00132e-13	3.59477e-12	SLC6A14	protein_coding
ENSG00000268119.6	31.6825	1.94036	0.197087	9.84522	7.18813e-23	9.22859e-21	AC010615.2	lncRNA
ENSG00000268234.1	0.567652	1.16489	0.384384	3.03055	0.00244112	0.00775232	FKBP4P6	processed_pseudogene
ENSG00000268278.1	5.73386	2.58483	0.477712	5.41085	6.27273e-08	6.81885e-07	AC123912.3	unprocessed_pseudogene
ENSG00000268433.1	1.86121	1.16025	0.365815	3.17169	0.00151553	0.00515771	MTDHP3	processed_pseudogene
ENSG00000268438.1	1.03276	1.2997	0.248327	5.23382	1.66042e-07	1.62957e-06	BNIP3P27	processed_pseudogene
ENSG00000268496.1	1.90304	1.62058	0.34119	4.7498	2.03622e-06	1.53879e-05	AC245884.9	lncRNA
ENSG00000268510.1	1.36149	1.60245	0.294681	5.43794	5.39014e-08	5.97605e-07	IFNL3P1	unprocessed_pseudogene
ENSG00000268535.1	0.861737	1.00659	0.380602	2.64472	0.00817582	0.0217635	MTDHP4	processed_pseudogene
ENSG00000268555.2	24.2411	1.1961	0.262172	4.56227	5.06027e-06	3.44629e-05	AC123912.4	lncRNA
ENSG00000268621.6	3.07035	1.9048	0.322467	5.90697	3.48452e-09	5.06137e-08	IGFL2-AS1	lncRNA
ENSG00000268658.5	9.41493	1.99148	0.216185	9.21195	3.20243e-20	3.0722e-18	LINC00664	lncRNA
ENSG00000268660.1	1.6501	1.07211	0.285077	3.76077	0.00016939	0.000759453	LETM1P2	processed_pseudogene
ENSG00000268696.3	5.58106	1.95637	0.501551	3.90064	9.5937e-05	0.000463201	ZNF723	protein_coding
ENSG00000268789.1	1.21893	1.20423	0.399798	3.01208	0.00259463	0.00816846	VN1R87P	unprocessed_pseudogene
ENSG00000268879.1	0.87715	1.02576	0.389831	2.6313	0.00850593	0.0225001	IGFL1P1	unprocessed_pseudogene
ENSG00000268940.5	1.64656	2.48683	0.770234	3.22866	0.0012437	0.0043496	CT45A1	protein_coding
ENSG00000268941.2	1.79311	1.05673	0.317743	3.32574	0.000881835	0.00322993	LINC01711	lncRNA
ENSG00000268964.3	2.04955	2.04979	0.444612	4.6103	4.02081e-06	2.81498e-05	ERVV-2	protein_coding
ENSG00000268981.5	2.45581	1.15269	0.423475	2.72197	0.00648941	0.0179108	AC024563.1	lncRNA
ENSG00000269043.2	11.4196	1.2819	0.318167	4.02903	5.60084e-05	0.000288358	AC008554.1	lncRNA
ENSG00000269067.2	13.4926	1.68532	0.356277	4.73037	2.24111e-06	1.6716e-05	ZNF728	protein_coding
ENSG00000269345.1	3.66018	1.27716	0.351547	3.63296	0.00028019	0.0011847	VN1R85P	unprocessed_pseudogene
ENSG00000269356.1	0.767774	1.26357	0.358103	3.52851	0.00041791	0.00168609	AL356740.2	lncRNA
ENSG00000269364.1	0.526263	1.43667	0.59955	2.39625	0.0165636	0.0394347	LINC01233	lncRNA
ENSG00000269373.1	0.591363	1.35875	0.356412	3.81231	0.000137675	0.000634472	AC008739.2	unprocessed_pseudogene
ENSG00000269376.1	2.19786	1.67636	0.342927	4.88837	1.01676e-06	8.28373e-06	AL356740.3	lncRNA
ENSG00000269404.7	58.6416	1.87638	0.233685	8.0295	9.78706e-16	5.1604e-14	SPIB	protein_coding
ENSG00000269416.6	32.8121	2.03992	0.255461	7.98526	1.4023e-15	7.13624e-14	LINC01224	lncRNA
ENSG00000269516.6	9.17767	1.76217	0.252459	6.98001	2.95149e-12	8.07708e-11	CYP4F23P	transcribed_unprocessed_pseudogene
ENSG00000269526.1	0.863519	2.5165	0.539271	4.66649	3.06391e-06	2.2077e-05	ERVV-1	protein_coding
ENSG00000269586.7	1.68401	2.18849	0.740737	2.95448	0.00313194	0.00960525	CT45A10	protein_coding
ENSG00000269662.1	0.806594	1.15735	0.333846	3.46673	0.000526826	0.00206638	BNIP3P39	processed_pseudogene
ENSG00000269699.6	3.14943	1.54644	0.311016	4.97223	6.61878e-07	5.65527e-06	ZIM2	protein_coding
ENSG00000269825.1	19.3176	1.66666	0.192119	8.67513	4.13083e-18	3.08793e-16	AC022150.4	lncRNA
ENSG00000269951.1	4.11953	1.14644	0.180174	6.36295	1.97917e-10	3.78476e-09	AC090181.2	lncRNA
ENSG00000269959.1	1.00347	1.341	0.310791	4.31479	1.59755e-05	9.57823e-05	SPACA6P-AS	lncRNA
ENSG00000269994.3	14.9394	1.36647	0.384767	3.55141	0.000383166	0.00156289	AL513318.1	lncRNA
ENSG00000270036.1	0.644045	1.46591	0.356874	4.10764	3.99714e-05	0.000214356	AC027243.2	lncRNA
ENSG00000270038.1	4.75361	1.86598	0.401458	4.648	3.35173e-06	2.38914e-05	AL133467.4	lncRNA
ENSG00000270164.1	30.6573	1.36922	0.212049	6.45708	1.06745e-10	2.15588e-09	LINC01480	lncRNA
ENSG00000270270.1	1.55307	1.04871	0.176539	5.94039	2.84343e-09	4.21671e-08	BNIP3P10	processed_pseudogene
ENSG00000270325.1	2.67033	1.15894	0.332683	3.4836	0.000494711	0.00195574	BNIP3P9	processed_pseudogene
ENSG00000270495.1	0.748217	1.47536	0.431622	3.41817	0.000630446	0.00241226	AC008825.2	processed_pseudogene
ENSG00000270533.2	5.97629	1.36728	0.316407	4.32125	1.55145e-05	9.33466e-05	CR382285.1	transcribed_processed_pseudogene
ENSG00000270947.1	0.478929	1.35613	0.565145	2.39962	0.0164121	0.0391254	AC025811.1	lncRNA
ENSG00000271035.1	0.436163	1.37949	0.46092	2.99291	0.00276332	0.00862094	AC010385.2	processed_pseudogene
ENSG00000271218.1	2.23635	1.2657	0.198255	6.3842	1.72293e-10	3.33724e-09	AL033384.2	lncRNA
ENSG00000271524.1	2.86387	2.20979	0.276086	8.00399	1.20447e-15	6.25526e-14	BNIP3P17	processed_pseudogene
ENSG00000271550.1	10.6047	1.18648	0.130399	9.09884	9.13024e-20	8.36398e-18	BNIP3P11	processed_pseudogene
ENSG00000271662.1	5.0806	1.28519	0.164346	7.82005	5.28033e-15	2.39949e-13	AC233280.2	processed_pseudogene
ENSG00000271936.1	19.0876	1.03687	0.128207	8.08745	6.09268e-16	3.29807e-14	AC012073.1	lncRNA
ENSG00000271947.1	2.21664	1.24128	0.296312	4.1891	2.8006e-05	0.000156381	AC017076.1	lncRNA
ENSG00000272046.1	5.29286	1.42284	0.338279	4.20612	2.59787e-05	0.000146506	AL445647.1	lncRNA
ENSG00000272071.1	0.544091	1.09854	0.315565	3.48117	0.00049923	0.00197112	AC122710.2	lncRNA
ENSG00000272141.1	14.5163	1.17075	0.282671	4.14173	3.44695e-05	0.00018839	AL390719.2	lncRNA
ENSG00000272202.1	0.953876	1.13811	0.34581	3.29114	0.000997823	0.00359154	AC097358.2	lncRNA
ENSG00000272328.1	0.650279	1.01824	0.43183	2.35797	0.0183751	0.0430384	AC007128.2	lncRNA
ENSG00000272342.1	1.27037	1.22136	0.471088	2.59264	0.00952421	0.0247575	AC116609.3	lncRNA
ENSG00000272609.1	0.591561	1.21214	0.405848	2.98669	0.00282016	0.00878006	AC016252.1	lncRNA
ENSG00000272620.2	319.727	1.58675	0.325355	4.87697	1.07728e-06	8.7225e-06	AFAP1-AS1	lncRNA
ENSG00000272763.1	2.26155	1.96424	0.296294	6.62937	3.37121e-11	7.54557e-10	AC103702.2	lncRNA
ENSG00000272865.2	1.60633	2.21087	0.368635	5.99746	2.00423e-09	3.08734e-08	AL591686.2	lncRNA
ENSG00000273203.1	5.41897	1.56068	0.315586	4.94533	7.60137e-07	6.37961e-06	AC006946.2	lncRNA
ENSG00000273442.1	0.864	1.16498	0.406573	2.86536	0.00416533	0.0122808	AC006946.3	lncRNA
ENSG00000273693.1	1.58548	1.05775	0.368993	2.8666	0.00414909	0.0122431	CDRT15P10	processed_pseudogene
ENSG00000273786.1	1.54567	1.59556	0.221483	7.20401	5.84678e-13	1.84912e-11	AC020658.4	lncRNA
ENSG00000273906.1	56.6198	1.21471	0.425909	2.85203	0.00434405	0.0127367	AC011297.1	lncRNA
ENSG00000274253.5	6.92838	1.24761	0.207685	6.00724	1.88709e-09	2.92647e-08	AC138649.1	lncRNA
ENSG00000274312.1	1.36237	1.86891	0.486905	3.83834	0.00012387	0.000579044	AC015722.2	lncRNA
ENSG00000274588.2	19.1654	2.05986	0.357596	5.7603	8.39669e-09	1.11964e-07	DGKK	protein_coding
ENSG00000274827.4	1.82579	1.77087	0.489757	3.61581	0.000299414	0.00125553	LINC01297	lncRNA
ENSG00000274840.4	5.06419	1.1334	0.389293	2.91144	0.00359772	0.010828	AC132807.2	lncRNA
ENSG00000275004.4	15.9645	1.25485	0.213828	5.86851	4.39721e-09	6.22954e-08	ZNF280B	protein_coding
ENSG00000275016.5	1.67245	1.38879	0.326378	4.25515	2.0891e-05	0.000121116	AC015574.1	lncRNA
ENSG00000275216.2	1.87862	1.86706	0.48182	3.87501	0.000106618	0.000508026	AL161431.1	lncRNA
ENSG00000275340.1	4.10722	1.65868	0.344416	4.81592	1.46526e-06	1.14593e-05	FGD5P1	transcribed_unprocessed_pseudogene
ENSG00000275395.6	624.153	1.11839	0.192323	5.81518	6.05689e-09	8.32394e-08	FCGBP	protein_coding
ENSG00000275465.7	7.22209	1.58379	0.375263	4.22049	2.43777e-05	0.000138769	AL449403.2	lncRNA
ENSG00000275591.5	1.59092	1.24582	0.27506	4.52925	5.91926e-06	3.97101e-05	XKR5	protein_coding
ENSG00000275620.1	1.86463	1.70078	0.350501	4.85242	1.21965e-06	9.73236e-06	FLJ16779	lncRNA
ENSG00000275785.1	0.931542	1.12426	0.330901	3.39756	0.000679897	0.00257551	AC015914.2	unprocessed_pseudogene
ENSG00000275793.1	3.59696	1.03475	0.176502	5.86253	4.5588e-09	6.42623e-08	RIMBP3	protein_coding
ENSG00000275874.1	1.0305	1.09335	0.386109	2.83173	0.00462976	0.0134523	PICSAR	lncRNA
ENSG00000275896.6	12.2159	1.75691	0.387028	4.53951	5.63857e-06	3.80413e-05	PRSS2	protein_coding
ENSG00000276043.5	298.348	1.84097	0.120371	15.2941	8.36734e-53	9.63248e-50	UHRF1	protein_coding
ENSG00000276067.2	0.749415	1.06706	0.354715	3.00823	0.00262773	0.00825588	SLC23A4P	transcribed_unprocessed_pseudogene
ENSG00000276248.1	10.804	1.01237	0.124833	8.10981	5.06986e-16	2.77925e-14	AL442125.1	lncRNA
ENSG00000276399.1	2.7791	1.33742	0.534264	2.50329	0.0123046	0.0307296	FLJ36000	lncRNA
ENSG00000276404.1	1.11894	1.19212	0.249468	4.77864	1.76481e-06	1.35383e-05	MIR6835	miRNA
ENSG00000276405.1	1.76765	1.02012	0.302975	3.367	0.000759911	0.00283937	TRBV13	TR_V_gene
ENSG00000276476.3	9.7002	1.19503	0.326216	3.6633	0.000248984	0.00106752	LINC00540	lncRNA
ENSG00000276763.1	0.62624	1.43383	0.247798	5.7863	7.19535e-09	9.76802e-08	AC069499.2	processed_pseudogene
ENSG00000277058.2	1.16354	1.80187	0.562089	3.20566	0.00134752	0.00465846	HNRNPCL3	protein_coding
ENSG00000277215.2	1.56899	1.01113	0.274633	3.68175	0.00023164	0.00100036	SPANXA2-OT1	lncRNA
ENSG00000277586.4	6.74531	1.37776	0.327748	4.20371	2.6257e-05	0.000147737	NEFL	protein_coding
ENSG00000277693.2	3.29169	1.85397	0.429433	4.31726	1.57977e-05	9.49184e-05	AP003900.1	lncRNA
ENSG00000277738.1	3.99242	2.54556	0.457121	5.56868	2.56678e-08	3.05888e-07	AC126175.2	lncRNA
ENSG00000277987.2	1.22691	2.18605	0.492231	4.44111	8.94948e-06	5.73431e-05	LINC02351	lncRNA
ENSG00000278095.1	0.735052	1.05745	0.320313	3.30129	0.000962398	0.003484	AC022509.4	lncRNA
ENSG00000278195.2	14.8989	2.14901	0.288773	7.44189	9.92556e-14	3.57444e-12	SSTR3	protein_coding
ENSG00000278200.1	0.807743	1.29757	0.341276	3.80212	0.000143465	0.0006573	LINC01971	lncRNA
ENSG00000278291.1	4.12936	1.41482	0.222568	6.35678	2.06028e-10	3.92464e-09	AL161772.1	lncRNA
ENSG00000278301.1	0.47613	1.21885	0.424761	2.86949	0.00411138	0.0121526	GRAMD4P3	processed_pseudogene
ENSG00000278318.5	98.4544	1.08992	0.172743	6.30951	2.79919e-10	5.16691e-09	ZNF229	protein_coding
ENSG00000278635.1	4.85338	1.17743	0.175363	6.71424	1.89045e-11	4.45352e-10	AC141557.2	unprocessed_pseudogene
ENSG00000279024.1	0.519739	1.21798	0.337356	3.61037	0.000305759	0.00127872	AC112255.1	TEC
ENSG00000279039.1	1.70841	1.72925	0.261055	6.62407	3.49453e-11	7.79128e-10	AC011447.6	TEC
ENSG00000279154.1	1.48459	2.37545	0.500925	4.74213	2.11487e-06	1.59062e-05	AL353726.2	TEC
ENSG00000279206.1	0.706032	1.09721	0.274113	4.00277	6.2605e-05	0.0003181	AC004943.3	lncRNA
ENSG00000279220.4	4.44194	1.35807	0.568892	2.38721	0.0169766	0.0402598	GPR1-AS	lncRNA
ENSG00000279377.1	0.967043	1.45869	0.363729	4.01038	6.06204e-05	0.000309153	AC003973.2	TEC
ENSG00000279479.1	3.14426	2.04059	0.37239	5.4797	4.26047e-08	4.84012e-07	AP005205.3	TEC
ENSG00000279511.1	0.850221	2.20895	0.548158	4.02977	5.58305e-05	0.000287485	AL356274.2	TEC
ENSG00000279516.2	11.9613	1.25924	0.517729	2.43223	0.0150061	0.036287	FAM230C	lncRNA
ENSG00000279565.1	2.15706	1.90441	0.383346	4.96787	6.76915e-07	5.76948e-06	AL121835.2	TEC
ENSG00000279581.1	1.65044	1.71048	0.308309	5.54794	2.89062e-08	3.40254e-07	AC073862.2	TEC
ENSG00000279673.1	20.4045	1.17918	0.179395	6.57312	4.9271e-11	1.06485e-09	AC092919.2	TEC
ENSG00000279726.2	0.648413	1.47601	0.528638	2.79209	0.0052368	0.0149272	AC005609.5	lncRNA
ENSG00000279756.1	0.683662	1.97304	0.636518	3.09973	0.00193695	0.0063594	AC012317.2	TEC
ENSG00000279783.1	1.07394	2.03918	0.543434	3.75239	0.000175153	0.000782792	AC018692.2	processed_pseudogene
ENSG00000279791.1	1.02068	1.48096	0.270714	5.47058	4.48567e-08	5.06762e-07	AC018892.3	TEC
ENSG00000279844.1	1.04645	2.09075	0.542376	3.85479	0.000115829	0.00054611	AC096656.1	TEC
ENSG00000279924.1	1.21235	1.23137	0.521154	2.36278	0.0181382	0.0425797	AL356585.4	unprocessed_pseudogene
ENSG00000279973.2	3.26427	2.45073	0.532744	4.6002	4.22077e-06	2.93651e-05	CU104787.1	lncRNA
ENSG00000280002.1	9.96341	1.23868	0.483045	2.56431	0.0103381	0.0265219	AC078925.4	TEC
ENSG00000280079.1	28.1463	1.64569	0.185457	8.87369	7.07629e-19	5.91736e-17	AC011447.7	TEC
ENSG00000280081.4	90.6356	1.99479	0.465174	4.28828	1.80066e-05	0.000106413	LINC01667	transcribed_processed_pseudogene
ENSG00000280109.3	3.54868	1.77791	0.331773	5.35882	8.37678e-08	8.8363e-07	PLAC4	lncRNA
ENSG00000280117.1	0.715459	1.46642	0.341097	4.29913	1.71469e-05	0.000101849	AC122688.4	TEC
ENSG00000280167.1	0.533342	1.19445	0.331392	3.60436	0.000312926	0.00130506	AP000943.3	TEC
ENSG00000280180.1	3.19651	2.6374	0.508498	5.18665	2.14112e-07	2.05919e-06	AC023824.6	TEC
ENSG00000280200.1	1.71149	1.47812	0.2996	4.93363	8.07142e-07	6.72995e-06	AC073862.5	TEC
ENSG00000280217.1	1.7321	1.1616	0.369494	3.14376	0.00166792	0.00559202	AC126564.1	TEC
ENSG00000280236.3	2.65312	2.13712	0.534625	3.99742	6.40365e-05	0.000324657	OR12D2	protein_coding
ENSG00000280241.4	1.01579	1.29421	0.377874	3.42498	0.00061484	0.00235777	AC079298.3	lncRNA
ENSG00000280424.1	1.27907	1.19128	0.292478	4.07306	4.63989e-05	0.000244497	BX537318.2	TEC
ENSG00000280623.1	3.79472	1.10682	0.345393	3.20452	0.00135287	0.00467462	PCAT14	lncRNA
ENSG00000280683.1	2.43267	2.12566	0.465245	4.5689	4.90291e-06	3.35633e-05	LINC01242	lncRNA
ENSG00000280890.1	1.58063	1.15925	0.23188	4.99937	5.75194e-07	4.9822e-06	ELDR	lncRNA
ENSG00000281131.1	1.02952	1.90503	0.663786	2.86994	0.0041055	0.0121362	SCHLAP1	lncRNA
ENSG00000281392.2	5.77633	1.34535	0.191378	7.02983	2.06789e-12	5.88761e-11	LINC00506	lncRNA
ENSG00000281406.2	4.05871	1.81833	0.287492	6.3248	2.53568e-10	4.73108e-09	BLACAT1	protein_coding
ENSG00000281706.3	8.3584	1.0852	0.243426	4.45802	8.27196e-06	5.34282e-05	LINC01012	lncRNA
ENSG00000282381.1	0.962685	2.03336	0.289943	7.01295	2.33341e-12	6.52523e-11	AC104073.4	lncRNA
ENSG00000282419.3	1.00468	1.79955	0.454357	3.96066	7.4743e-05	0.000371413	TEX13D	protein_coding
ENSG00000282639.1	23.575	1.46746	0.332837	4.40893	1.03882e-05	6.529e-05	IGHV3-64D	IG_V_gene
ENSG00000282651.2	54.7454	1.40235	0.370267	3.78739	0.000152236	0.000691338	IGHV5-10-1	IG_V_gene
ENSG00000282815.1	39.1256	1.84353	0.500082	3.68646	0.000227397	0.000984504	TEX13C	protein_coding
ENSG00000282906.1	1.27562	1.1823	0.418077	2.82794	0.00468486	0.0135906	AL513321.2	lncRNA
ENSG00000282911.1	2.60914	2.01172	0.469269	4.28691	1.81174e-05	0.000106939	DUX4L35	unprocessed_pseudogene
ENSG00000283020.1	0.702761	1.82271	0.360702	5.05322	4.34417e-07	3.87275e-06	DUX4L37	unprocessed_pseudogene
ENSG00000283047.1	44.1982	1.15019	0.331901	3.46546	0.000529328	0.00207501	FRG1FP	unprocessed_pseudogene
ENSG00000283403.1	4.30874	1.55891	0.426918	3.65156	0.000260657	0.00111136	AC005394.2	lncRNA
ENSG00000283431.1	1.19344	3.23457	0.668478	4.83871	1.30686e-06	1.03565e-05	AC099654.5	unprocessed_pseudogene
ENSG00000283464.1	1.00497	1.00733	0.423282	2.3798	0.017322	0.0409608	AC244452.35	IG_V_pseudogene
ENSG00000283554.1	2.77576	1.82379	0.32556	5.60202	2.11869e-08	2.57645e-07	LINC02341	lncRNA
ENSG00000283579.1	0.755692	1.24521	0.360699	3.4522	0.000556027	0.00216201	AL160035.1	lncRNA
ENSG00000283646.2	21.765	1.42996	0.266776	5.36013	8.31627e-08	8.78234e-07	LINC02009	lncRNA
ENSG00000284640.1	1.70537	1.22402	0.365251	3.35118	0.000804686	0.00298663	AL590434.1	lncRNA
ENSG00000284668.2	1.67863	2.05007	0.53579	3.82626	0.000130106	0.00060362	LINC02780	lncRNA
ENSG00000284672.1	0.887277	1.43488	0.373489	3.84184	0.000122118	0.000571471	AC109583.4	lncRNA
ENSG00000284703.1	1.57279	1.04272	0.372643	2.79818	0.00513912	0.0147022	AL805961.1	lncRNA
ENSG00000284727.1	7.03544	1.11051	0.292696	3.79407	0.000148196	0.000675655	AC116562.3	transcribed_unprocessed_pseudogene
ENSG00000284837.1	0.64839	1.80549	0.607246	2.97324	0.00294674	0.00911253	AC007846.1	lncRNA
ENSG00000284928.1	45.8414	1.03591	0.336434	3.07909	0.00207635	0.00674905	AL445205.1	lncRNA
ENSG00000284946.1	20.1601	1.61545	0.132019	12.2365	1.98361e-34	5.52466e-32	AC068831.6	protein_coding
ENSG00000285077.2	10.3962	1.09831	0.118401	9.27621	1.75612e-20	1.75795e-18	ARHGAP11B	protein_coding
ENSG00000285155.1	0.989412	1.45449	0.429151	3.38924	0.000700877	0.00264454	AC092153.1	lncRNA
ENSG00000285417.1	111.461	1.54732	0.262435	5.89599	3.7244e-09	5.37059e-08	BX571818.1	transcribed_unitary_pseudogene
ENSG00000285476.1	12.3909	1.88478	0.304748	6.18472	6.22142e-10	1.07378e-08	AC139491.7	protein_coding
ENSG00000285524.1	5.89713	1.73142	0.430095	4.02565	5.68171e-05	0.000292086	AC073236.1	lncRNA
ENSG00000285591.1	1.66707	1.01561	0.252513	4.022	5.77062e-05	0.000296216	AC092617.1	lncRNA
ENSG00000285600.1	1.84805	1.78718	0.215607	8.28906	1.14146e-16	7.02698e-15	AC023593.1	lncRNA
ENSG00000285673.1	1.85362	1.92191	0.652479	2.94555	0.00322382	0.00984595	AC007092.1	lncRNA
ENSG00000285694.1	0.67838	1.56866	0.414103	3.78809	0.00015181	0.000689767	AL162718.2	lncRNA
ENSG00000285742.1	0.97703	1.72873	0.651107	2.65506	0.00792951	0.0212043	AL445604.1	lncRNA
ENSG00000285822.1	5.52628	2.00122	0.759121	2.63623	0.00838323	0.0222197	AC129926.2	lncRNA
ENSG00000285876.1	1.09061	1.90345	0.532664	3.57346	0.000352301	0.00145134	AC093912.1	lncRNA
ENSG00000285899.1	2.60081	2.93545	0.789452	3.71834	0.000200534	0.000881478	AL023574.1	lncRNA
ENSG00000285914.1	0.699754	1.33496	0.426438	3.13049	0.00174512	0.00580535	AC022440.1	lncRNA
ENSG00000285933.1	4.96291	1.13978	0.459817	2.47877	0.0131837	0.0325665	AP003498.2	lncRNA
ENSG00000285986.1	10.3093	1.37509	0.252733	5.4409	5.30112e-08	5.89438e-07	BX248415.1	unprocessed_pseudogene
ENSG00000285987.1	1.12879	1.82212	0.544427	3.34685	0.000817344	0.00302776	AL157886.1	lncRNA
ENSG00000286046.1	1.95234	1.88568	0.427069	4.41541	1.00821e-05	6.36671e-05	AC093898.1	lncRNA
ENSG00000286058.1	14.6889	1.45753	0.494681	2.9464	0.00321492	0.00982221	AC018865.2	lncRNA
ENSG00000286063.1	1.37472	1.75176	0.430338	4.07067	4.68786e-05	0.000246799	AL121888.1	lncRNA
ENSG00000286099.1	6.43611	1.93921	0.470858	4.11845	3.81427e-05	0.000205989	AL390800.1	lncRNA
ENSG00000286101.1	2.78019	1.11014	0.477713	2.32386	0.0201331	0.0463823	AC093894.2	lncRNA
ENSG00000286123.1	0.838293	1.58996	0.568788	2.79535	0.00518434	0.0148046	AL049828.2	lncRNA
ENSG00000286208.1	1.35051	2.5073	0.596663	4.20221	2.6432e-05	0.000148625	AC093838.1	lncRNA
ENSG00000286251.2	0.564942	1.78943	0.610514	2.93102	0.00337851	0.0102572	AC097528.1	lncRNA
ENSG00000286257.2	3.76657	1.18236	0.327941	3.60539	0.00031169	0.00130085	AL137100.3	lncRNA
ENSG00000286284.1	14.6672	2.37059	0.51135	4.63595	3.55299e-06	2.51653e-05	AL590681.1	lncRNA
ENSG00000286299.1	2.81509	1.22352	0.189009	6.47334	9.58603e-11	1.95433e-09	AL121938.1	lncRNA
ENSG00000286329.1	19.5112	1.46491	0.342186	4.28103	1.86029e-05	0.000109412	AC108690.1	lncRNA
ENSG00000286355.1	2.3279	1.48957	0.291389	5.11195	3.18845e-07	2.93096e-06	AL355834.2	lncRNA
ENSG00000286358.1	5.15054	1.24098	0.457221	2.71419	0.0066439	0.0182497	AC096647.1	lncRNA
ENSG00000286385.1	1.76099	1.90876	0.554663	3.44129	0.000578941	0.00223925	AL445255.1	lncRNA
ENSG00000286396.1	0.543911	1.23247	0.396814	3.10592	0.00189688	0.00624445	AC023049.1	unprocessed_pseudogene
ENSG00000286447.1	1.10759	1.63609	0.530784	3.0824	0.0020534	0.00668012	AC109782.1	lncRNA
ENSG00000286449.1	8.91275	1.03498	0.245672	4.21285	2.52164e-05	0.00014286	AC016590.4	lncRNA
ENSG00000286456.1	0.835681	1.29818	0.513904	2.52612	0.011533	0.0291072	AC016769.5	lncRNA
ENSG00000286480.1	2.02019	1.37512	0.307282	4.47509	7.63784e-06	4.98828e-05	AC009501.2	lncRNA
ENSG00000286481.1	1.55311	1.129	0.30866	3.65775	0.000254443	0.0010883	AC011246.1	lncRNA
ENSG00000286498.1	0.758212	1.77623	0.473226	3.75346	0.000174411	0.000779937	AL132982.1	lncRNA
[truncated: 943 more rows]
