# Supplementary material for: NamiRNA-mediated high expression of KNSTRN correlates with poor prognosis and tumor immune infiltration of hepatocellular carcinoma
Source: Research Square preprint supplement (doi:10.21203/rs.3.rs-3032233/v1), 2023-06-26
Supplement: Supplementary file 4 [file 5e6960fec53955653ca0328a.xlsx]

## Sheet: Sheet 1
Supplementary File.3 The GO and KEGG enrichment analysis of the overlapping genes of the KNSTRN-related genes and DEGs.
ONTOLOGY	ID	Description	GeneRatio	BgRatio	pvalue	p.adjust	qvalue	geneID	Count
BP	GO:0000280	nuclear division	67/241	446/18800	1.02986e-52	2.17095e-49	1.84834e-49	NCAPD2/ANLN/RAD51/ASPM/TRIP13/SPAG5/SMC1B/NDC80/RAD54L/TPX2/KIF4A/CDC6/DMC1/MYBL2/CCNE1/NCAPG/RAD51AP1/FBXO5/TTK/SMC4/CDC20/NEK2/CENPF/KIF14/NCAPH/KIF18A/ZWINT/CENPK/DLGAP5/PKMYT1/PSMC3IP/TOP2A/CCNB1/CDCA8/ESPL1/KIF23/KIF11/KIF20B/CENPE/BRCA2/KIF2C/NUF2/FANCD2/CDCA5/NCAPG2/MKI67/INCENP/CHEK1/EME1/FBXO43/BUB1B/CCNB2/CDC25C/RACGAP1/KIF15/MAD2L1/PLK1/BUB1/UBE2C/CCNE2/AURKB/KNTC1/CDCA2/KIF18B/PRC1/KI…	67
BP	GO:0048285	organelle fission	67/241	493/18800	9.19477e-50	9.69128e-47	8.25109e-47	NCAPD2/ANLN/RAD51/ASPM/TRIP13/SPAG5/SMC1B/NDC80/RAD54L/TPX2/KIF4A/CDC6/DMC1/MYBL2/CCNE1/NCAPG/RAD51AP1/FBXO5/TTK/SMC4/CDC20/NEK2/CENPF/KIF14/NCAPH/KIF18A/ZWINT/CENPK/DLGAP5/PKMYT1/PSMC3IP/TOP2A/CCNB1/CDCA8/ESPL1/KIF23/KIF11/KIF20B/CENPE/BRCA2/KIF2C/NUF2/FANCD2/CDCA5/NCAPG2/MKI67/INCENP/CHEK1/EME1/FBXO43/BUB1B/CCNB2/CDC25C/RACGAP1/KIF15/MAD2L1/PLK1/BUB1/UBE2C/CCNE2/AURKB/KNTC1/CDCA2/KIF18B/PRC1/KI…	67
BP	GO:0007059	chromosome segregation	59/241	348/18800	2.32741e-49	1.63539e-46	1.39236e-46	NCAPD2/BRCA1/TRIP13/SPAG5/SMC1B/NDC80/KIF4A/CDC6/DMC1/OIP5/CCNE1/NCAPG/FBXO5/TTK/SMC4/ECT2/CDC20/NEK2/CENPF/KIF14/NCAPH/KIF18A/ZWINT/CENPK/HJURP/DLGAP5/PSMC3IP/TOP2A/CCNB1/CDCA8/ESPL1/KIF23/CENPE/KIF2C/NUF2/FANCD2/CDCA5/NCAPG2/MKI67/INCENP/SPC25/SKA1/EME1/BUB1B/RACGAP1/MAD2L1/SKA3/PLK1/BUB1/ESCO2/UBE2C/CCNE2/AURKB/KNTC1/CDCA2/KIF18B/PRC1/KIF4B/KIFC1	59
BP	GO:0140014	mitotic nuclear division	53/241	293/18800	9.14997e-46	4.82204e-43	4.10545e-43	NCAPD2/ANLN/TRIP13/SPAG5/SMC1B/NDC80/TPX2/KIF4A/CDC6/MYBL2/NCAPG/FBXO5/TTK/SMC4/CDC20/NEK2/CENPF/KIF14/NCAPH/KIF18A/ZWINT/CENPK/DLGAP5/PKMYT1/CCNB1/CDCA8/ESPL1/KIF23/KIF11/KIF20B/CENPE/KIF2C/NUF2/CDCA5/NCAPG2/MKI67/CHEK1/FBXO43/BUB1B/CDC25C/RACGAP1/KIF15/MAD2L1/PLK1/BUB1/UBE2C/AURKB/KNTC1/CDCA2/KIF18B/PRC1/KIF4B/KIFC1	53
BP	GO:0098813	nuclear chromosome segregation	52/241	287/18800	6.35255e-45	2.67823e-42	2.28023e-42	NCAPD2/TRIP13/SPAG5/SMC1B/NDC80/KIF4A/CDC6/DMC1/CCNE1/NCAPG/FBXO5/TTK/SMC4/ECT2/CDC20/NEK2/CENPF/KIF14/NCAPH/KIF18A/ZWINT/CENPK/DLGAP5/PSMC3IP/TOP2A/CCNB1/CDCA8/ESPL1/KIF23/CENPE/KIF2C/NUF2/FANCD2/CDCA5/NCAPG2/INCENP/SPC25/EME1/BUB1B/RACGAP1/MAD2L1/PLK1/BUB1/ESCO2/UBE2C/CCNE2/AURKB/KNTC1/KIF18B/PRC1/KIF4B/KIFC1	52
BP	GO:0000070	mitotic sister chromatid segregation	41/241	171/18800	1.09444e-40	3.84512e-38	3.27371e-38	NCAPD2/TRIP13/SPAG5/SMC1B/NDC80/KIF4A/CDC6/NCAPG/FBXO5/TTK/SMC4/CDC20/NEK2/CENPF/KIF14/NCAPH/KIF18A/ZWINT/CENPK/DLGAP5/CCNB1/CDCA8/ESPL1/KIF23/CENPE/KIF2C/NUF2/CDCA5/NCAPG2/BUB1B/RACGAP1/MAD2L1/PLK1/BUB1/UBE2C/AURKB/KNTC1/KIF18B/PRC1/KIF4B/KIFC1	41
BP	GO:0000819	sister chromatid segregation	43/241	205/18800	5.72148e-40	1.72298e-37	1.46694e-37	NCAPD2/TRIP13/SPAG5/SMC1B/NDC80/KIF4A/CDC6/NCAPG/FBXO5/TTK/SMC4/CDC20/NEK2/CENPF/KIF14/NCAPH/KIF18A/ZWINT/CENPK/DLGAP5/TOP2A/CCNB1/CDCA8/ESPL1/KIF23/CENPE/KIF2C/NUF2/CDCA5/NCAPG2/BUB1B/RACGAP1/MAD2L1/PLK1/BUB1/ESCO2/UBE2C/AURKB/KNTC1/KIF18B/PRC1/KIF4B/KIFC1	43
BP	GO:0044772	mitotic cell cycle phase transition	49/241	440/18800	6.99673e-32	1.84364e-29	1.56966e-29	ANLN/BRCA1/TRIP13/GTSE1/RBL1/NDC80/CLSPN/CDC6/CDC7/CDKN3/E2F1/CCNE1/EZH2/FOXM1/FBXO5/TTK/CENPF/KIF14/ZWINT/CIT/STIL/DLGAP5/PKMYT1/CCNB1/ESPL1/CENPE/DTL/CCNA2/CDCA5/CHEK1/BUB1B/CCNB2/CDC25C/CCNF/CDC25A/MAD2L1/TERT/MELK/E2F7/PLK1/BUB1/CDK1/RRM2/UBE2C/CCNE2/ATAD5/AURKB/KNTC1/BLM	49
BP	GO:0007346	regulation of mitotic cell cycle	49/241	478/18800	3.44553e-30	8.0702e-28	6.87091e-28	ANLN/BRCA1/TRIP13/GTSE1/WDR62/RBL1/NDC80/CLSPN/CDC6/CDC7/E2F1/EZH2/FBXO5/TTK/NEK2/CENPF/KIF14/ZWINT/STIL/DLGAP5/PKMYT1/CCNB1/ESPL1/KIF20B/CENPE/BRCA2/DTL/FANCD2/CDCA5/MKI67/CHEK1/EME1/FBXO43/BUB1B/CDC25C/CDC25A/MAD2L1/TERT/E2F7/PLK1/BUB1/CDK1/RRM2/UBE2C/ATAD5/AURKB/KNTC1/CDCA2/BLM	49
BP	GO:0051321	meiotic cell cycle	37/241	266/18800	1.31095e-27	2.76348e-25	2.35281e-25	NCAPD2/RAD51/ASPM/TRIP13/SMC1B/NDC80/RAD54L/DMC1/CCNE1/RAD51AP1/FBXO5/TTK/SMC4/CDC20/NEK2/NCAPH/KIF18A/PKMYT1/PSMC3IP/TOP2A/ESPL1/MNS1/BRCA2/NUF2/FANCD2/INCENP/EME1/FBXO43/BUB1B/CCNB2/CDC25C/CDC25A/PLK1/BUB1/EXO1/CCNE2/XRCC2	37
BP	GO:1901990	regulation of mitotic cell cycle phase transition	39/241	321/18800	8.11106e-27	1.55437e-24	1.32338e-24	ANLN/BRCA1/TRIP13/GTSE1/RBL1/NDC80/CLSPN/CDC6/CDC7/E2F1/EZH2/FBXO5/TTK/CENPF/KIF14/ZWINT/STIL/DLGAP5/CCNB1/ESPL1/CENPE/DTL/CDCA5/CHEK1/BUB1B/CDC25C/CDC25A/MAD2L1/TERT/E2F7/PLK1/BUB1/CDK1/RRM2/UBE2C/ATAD5/AURKB/KNTC1/BLM	39
BP	GO:1901987	regulation of cell cycle phase transition	43/241	415/18800	1.12833e-26	1.98211e-24	1.68755e-24	ANLN/BRCA1/TRIP13/GTSE1/RBL1/NDC80/WDR76/CLSPN/CDC45/CDC6/CDC7/E2F1/EZH2/FBXO5/TTK/CENPF/KIF14/ZWINT/STIL/DLGAP5/CCNB1/ESPL1/CENPE/DTL/FANCD2/CDCA5/CHEK1/EME1/BUB1B/CDC25C/CDC25A/MAD2L1/TERT/E2F7/PLK1/BUB1/CDK1/RRM2/UBE2C/ATAD5/AURKB/KNTC1/BLM	43
BP	GO:0007051	spindle organization	30/241	188/18800	2.59408e-24	4.2064e-22	3.5813e-22	ASPM/WDR62/SPAG5/NDC80/TPX2/KIF4A/MYBL2/FBXO5/TTK/CDC20/NEK2/GPSM2/STIL/DLGAP5/CCNB1/ESPL1/KIF23/KIF11/CENPE/NUF2/INCENP/SPC25/CCNB2/RACGAP1/KIF15/PLK1/AURKB/PRC1/KIF4B/KIFC1	30
BP	GO:1903046	meiotic cell cycle process	31/241	207/18800	3.12857e-24	4.71073e-22	4.01069e-22	NCAPD2/RAD51/ASPM/TRIP13/NDC80/RAD54L/DMC1/CCNE1/RAD51AP1/FBXO5/TTK/SMC4/CDC20/NCAPH/KIF18A/PSMC3IP/TOP2A/ESPL1/BRCA2/NUF2/FANCD2/INCENP/EME1/FBXO43/BUB1B/CCNB2/CDC25C/CDC25A/PLK1/BUB1/CCNE2	31
BP	GO:1902850	microtubule cytoskeleton organization involved in mitosis	27/241	151/18800	2.44158e-23	3.43123e-21	2.92133e-21	WDR62/NDC80/TPX2/KIF4A/MYBL2/TTK/CENPA/CDC20/NEK2/GPSM2/STIL/DLGAP5/CCNB1/ESPL1/KIF23/KIF11/CENPE/NUF2/SPC25/RACGAP1/KIF15/MAD2L1/PLK1/AURKB/PRC1/KIF4B/KIFC1	27
BP	GO:0090068	positive regulation of cell cycle process	32/241	247/18800	5.54035e-23	7.29942e-21	6.21467e-21	SPAG5/NDC80/CDC6/CDC7/EZH2/RAD51AP1/FBXO5/ECT2/KIF14/GPSM2/CIT/STIL/DLGAP5/E2F8/CCNB1/ESPL1/KIF23/KIF20B/PLK4/DTL/CDCA5/CDC25C/RACGAP1/CDC25A/MAD2L1/TERT/E2F7/CDK1/RRM2/UBE2C/ATAD5/AURKB	32
BP	GO:0010948	negative regulation of cell cycle process	34/241	301/18800	2.10046e-22	2.60457e-20	2.21751e-20	BRCA1/TRIP13/GTSE1/RBL1/NDC80/WDR76/CLSPN/CDC45/CDC6/E2F1/EZH2/FBXO5/TTK/NEK2/CENPF/ZWINT/E2F8/CCNB1/ESPL1/DTL/FANCD2/CHEK1/EME1/FBXO43/BUB1B/CCNF/MAD2L1/E2F7/PLK1/BUB1/CDK1/AURKB/KNTC1/BLM	34
BP	GO:0140013	meiotic nuclear division	28/241	188/18800	6.68993e-22	7.83465e-20	6.67037e-20	RAD51/ASPM/TRIP13/NDC80/RAD54L/DMC1/CCNE1/RAD51AP1/FBXO5/TTK/SMC4/CDC20/NCAPH/KIF18A/PSMC3IP/TOP2A/ESPL1/BRCA2/NUF2/FANCD2/INCENP/EME1/FBXO43/BUB1B/CCNB2/PLK1/BUB1/CCNE2	28
BP	GO:0051783	regulation of nuclear division	25/241	139/18800	9.51864e-22	1.05607e-19	8.99129e-20	TRIP13/NDC80/RAD51AP1/FBXO5/TTK/CDC20/NEK2/CENPF/ZWINT/DLGAP5/PKMYT1/CCNB1/ESPL1/KIF20B/MKI67/CHEK1/FBXO43/BUB1B/CDC25C/MAD2L1/PLK1/BUB1/AURKB/KNTC1/CDCA2	25
BP	GO:0007052	mitotic spindle organization	24/241	124/18800	1.02436e-21	1.07968e-19	9.1923e-20	WDR62/NDC80/TPX2/KIF4A/MYBL2/TTK/CDC20/NEK2/GPSM2/STIL/DLGAP5/CCNB1/KIF23/KIF11/CENPE/NUF2/SPC25/RACGAP1/KIF15/PLK1/AURKB/PRC1/KIF4B/KIFC1	24
BP	GO:0007088	regulation of mitotic nuclear division	23/241	111/18800	1.42252e-21	1.42794e-19	1.21574e-19	TRIP13/NDC80/FBXO5/TTK/NEK2/CENPF/ZWINT/DLGAP5/PKMYT1/CCNB1/ESPL1/KIF20B/MKI67/CHEK1/FBXO43/BUB1B/CDC25C/MAD2L1/PLK1/BUB1/AURKB/KNTC1/CDCA2	23
BP	GO:0045787	positive regulation of cell cycle	34/241	329/18800	3.77874e-21	3.62072e-19	3.08266e-19	SPAG5/NDC80/CDC6/CDC7/EZH2/RAD51AP1/FBXO5/ECT2/KIF14/GPSM2/CIT/STIL/DLGAP5/E2F8/CCNB1/ESPL1/KIF23/KIF20B/BRCA2/PLK4/DTL/CDCA5/CHEK1/CDC25C/RACGAP1/CDC25A/MAD2L1/TERT/E2F7/CDK1/RRM2/UBE2C/ATAD5/AURKB	34
BP	GO:0140694	non-membrane-bounded organelle assembly	36/241	379/18800	4.10128e-21	3.75892e-19	3.20032e-19	ANLN/BRCA1/ASPM/WDR62/SPAG5/NDC80/TPX2/KIF4A/MYBL2/FBXO5/CENPA/CDC20/NEK2/CENPF/GPSM2/CENPK/STIL/DLGAP5/KIF23/KIF11/CENPE/PLK4/INCENP/PGM5/CCNB2/RACGAP1/KIF15/RPL10L/PLK1/AURKB/VCX/NEB/KNTC1/PRC1/KIF4B/KIFC1	36
BP	GO:0051983	regulation of chromosome segregation	21/241	91/18800	7.62582e-21	6.69801e-19	5.70264e-19	TRIP13/NDC80/CDC6/FBXO5/TTK/CENPF/ZWINT/DLGAP5/CCNB1/ESPL1/CENPE/KIF2C/MKI67/BUB1B/MAD2L1/PLK1/BUB1/UBE2C/AURKB/KNTC1/CDCA2	21
BP	GO:0030071	regulation of mitotic metaphase/anaphase transition	18/241	60/18800	2.64304e-20	2.22861e-18	1.89743e-18	TRIP13/NDC80/CDC6/FBXO5/TTK/CENPF/ZWINT/DLGAP5/CCNB1/ESPL1/CENPE/BUB1B/MAD2L1/PLK1/BUB1/UBE2C/AURKB/KNTC1	18
BP	GO:0051304	chromosome separation	21/241	97/18800	3.22159e-20	2.61197e-18	2.22381e-18	TRIP13/NDC80/CDC6/FBXO5/TTK/CENPF/NCAPH/ZWINT/DLGAP5/TOP2A/CCNB1/ESPL1/CENPE/EME1/BUB1B/MAD2L1/PLK1/BUB1/UBE2C/AURKB/KNTC1	21
BP	GO:0007091	metaphase/anaphase transition of mitotic cell cycle	18/241	62/18800	5.16501e-20	4.03254e-18	3.43327e-18	TRIP13/NDC80/CDC6/FBXO5/TTK/CENPF/ZWINT/DLGAP5/CCNB1/ESPL1/CENPE/BUB1B/MAD2L1/PLK1/BUB1/UBE2C/AURKB/KNTC1	18
BP	GO:1902099	regulation of metaphase/anaphase transition of cell cycle	18/241	63/18800	7.14962e-20	5.38264e-18	4.58274e-18	TRIP13/NDC80/CDC6/FBXO5/TTK/CENPF/ZWINT/DLGAP5/CCNB1/ESPL1/CENPE/BUB1B/MAD2L1/PLK1/BUB1/UBE2C/AURKB/KNTC1	18
BP	GO:0010965	regulation of mitotic sister chromatid separation	18/241	65/18800	1.34489e-19	9.4501e-18	8.04575e-18	TRIP13/NDC80/CDC6/FBXO5/TTK/CENPF/ZWINT/DLGAP5/CCNB1/ESPL1/CENPE/BUB1B/MAD2L1/PLK1/BUB1/UBE2C/AURKB/KNTC1	18
BP	GO:0044784	metaphase/anaphase transition of cell cycle	18/241	65/18800	1.34489e-19	9.4501e-18	8.04575e-18	TRIP13/NDC80/CDC6/FBXO5/TTK/CENPF/ZWINT/DLGAP5/CCNB1/ESPL1/CENPE/BUB1B/MAD2L1/PLK1/BUB1/UBE2C/AURKB/KNTC1	18
BP	GO:0000075	cell cycle checkpoint signaling	25/241	170/18800	1.60588e-19	1.092e-17	9.29722e-18	BRCA1/TRIP13/GTSE1/NDC80/WDR76/CLSPN/CDC45/CDC6/E2F1/TTK/CENPF/ZWINT/CCNB1/DTL/FANCD2/CHEK1/EME1/BUB1B/MAD2L1/PLK1/BUB1/CDK1/AURKB/KNTC1/BLM	25
BP	GO:0033044	regulation of chromosome organization	27/241	212/18800	2.48448e-19	1.61984e-17	1.37912e-17	NCAPD2/TRIP13/MCM2/NDC80/CDC6/NCAPG/FBXO5/TTK/SMC4/NEK2/CENPF/NCAPH/ZWINT/DLGAP5/TOP2A/CCNB1/ESPL1/CENPE/PIF1/CDCA5/BUB1B/MAD2L1/PLK1/BUB1/UBE2C/AURKB/KNTC1	27
BP	GO:0044839	cell cycle G2/M phase transition	24/241	155/18800	2.5358e-19	1.61984e-17	1.37912e-17	BRCA1/NDC80/CLSPN/CDC6/CDC7/FOXM1/FBXO5/CENPF/KIF14/CIT/PKMYT1/CCNB1/DTL/CCNA2/CHEK1/CCNB2/CDC25C/CDC25A/MELK/PLK1/CDK1/ATAD5/AURKB/BLM	24
BP	GO:1901988	negative regulation of cell cycle phase transition	29/241	255/18800	2.61321e-19	1.62019e-17	1.37942e-17	BRCA1/TRIP13/GTSE1/RBL1/NDC80/WDR76/CLSPN/CDC45/CDC6/E2F1/EZH2/FBXO5/TTK/CENPF/ZWINT/CCNB1/DTL/FANCD2/CHEK1/EME1/BUB1B/MAD2L1/E2F7/PLK1/BUB1/CDK1/AURKB/KNTC1/BLM	29
BP	GO:0051306	mitotic sister chromatid separation	18/241	68/18800	3.32396e-19	1.96449e-17	1.67255e-17	TRIP13/NDC80/CDC6/FBXO5/TTK/CENPF/ZWINT/DLGAP5/CCNB1/ESPL1/CENPE/BUB1B/MAD2L1/PLK1/BUB1/UBE2C/AURKB/KNTC1	18
BP	GO:0006260	DNA replication	30/241	280/18800	3.35491e-19	1.96449e-17	1.67255e-17	RAD51/POLQ/MCM10/MCM2/CDC45/CDC6/CDC7/GINS1/RNASEH2A/CCNE1/FBXO5/E2F8/POLN/BRCA2/PIF1/DTL/CCNA2/GINS4/CHEK1/EME1/CHAF1B/E2F7/CDK1/ESCO2/RRM2/CCNE2/ATAD5/FAM111B/BLM/WDHD1	30
BP	GO:0045786	negative regulation of cell cycle	34/241	387/18800	6.58015e-19	3.74891e-17	3.19179e-17	BRCA1/TRIP13/GTSE1/RBL1/NDC80/WDR76/CLSPN/CDC45/CDC6/E2F1/EZH2/FBXO5/TTK/NEK2/CENPF/ZWINT/E2F8/CCNB1/ESPL1/DTL/FANCD2/CHEK1/EME1/FBXO43/BUB1B/CCNF/MAD2L1/E2F7/PLK1/BUB1/CDK1/AURKB/KNTC1/BLM	34
BP	GO:0033045	regulation of sister chromatid segregation	18/241	72/18800	1.03343e-18	5.58583e-17	4.75574e-17	TRIP13/NDC80/CDC6/FBXO5/TTK/CENPF/ZWINT/DLGAP5/CCNB1/ESPL1/CENPE/BUB1B/MAD2L1/PLK1/BUB1/UBE2C/AURKB/KNTC1	18
BP	GO:1905818	regulation of chromosome separation	18/241	72/18800	1.03343e-18	5.58583e-17	4.75574e-17	TRIP13/NDC80/CDC6/FBXO5/TTK/CENPF/ZWINT/DLGAP5/CCNB1/ESPL1/CENPE/BUB1B/MAD2L1/PLK1/BUB1/UBE2C/AURKB/KNTC1	18
BP	GO:0007093	mitotic cell cycle checkpoint signaling	22/241	130/18800	1.14772e-18	6.0485e-17	5.14965e-17	BRCA1/TRIP13/GTSE1/NDC80/CLSPN/CDC6/TTK/CENPF/ZWINT/CCNB1/DTL/FANCD2/CHEK1/EME1/BUB1B/MAD2L1/PLK1/BUB1/CDK1/AURKB/KNTC1/BLM	22
BP	GO:0051225	spindle assembly	21/241	121/18800	4.1787e-18	2.14847e-16	1.82919e-16	ASPM/SPAG5/NDC80/TPX2/KIF4A/MYBL2/FBXO5/CDC20/NEK2/GPSM2/KIF23/KIF11/INCENP/CCNB2/RACGAP1/KIF15/PLK1/AURKB/PRC1/KIF4B/KIFC1	21
BP	GO:1901991	negative regulation of mitotic cell cycle phase transition	24/241	183/18800	1.34695e-17	6.76043e-16	5.75578e-16	BRCA1/TRIP13/GTSE1/RBL1/NDC80/CLSPN/CDC6/EZH2/FBXO5/TTK/CENPF/ZWINT/CCNB1/DTL/CHEK1/BUB1B/MAD2L1/E2F7/PLK1/BUB1/CDK1/AURKB/KNTC1/BLM	24
BP	GO:0045930	negative regulation of mitotic cell cycle	26/241	234/18800	3.68629e-17	1.80714e-15	1.53859e-15	BRCA1/TRIP13/GTSE1/RBL1/NDC80/CLSPN/CDC6/EZH2/FBXO5/TTK/CENPF/ZWINT/CCNB1/DTL/FANCD2/CHEK1/EME1/BUB1B/MAD2L1/E2F7/PLK1/BUB1/CDK1/AURKB/KNTC1/BLM	26
BP	GO:0000086	G2/M transition of mitotic cell cycle	21/241	140/18800	9.39079e-17	4.49904e-15	3.83045e-15	BRCA1/CLSPN/CDC6/CDC7/FOXM1/FBXO5/CENPF/KIF14/CIT/PKMYT1/CCNB1/DTL/CCNA2/CHEK1/CDC25C/CDC25A/MELK/PLK1/CDK1/AURKB/BLM	21
BP	GO:0051784	negative regulation of nuclear division	15/241	55/18800	2.02141e-16	9.4692e-15	8.06201e-15	TRIP13/NDC80/FBXO5/TTK/CENPF/ZWINT/CCNB1/CHEK1/FBXO43/BUB1B/MAD2L1/PLK1/BUB1/AURKB/KNTC1	15
BP	GO:0000910	cytokinesis	22/241	174/18800	7.01896e-16	3.21652e-14	2.73852e-14	ANLN/KIF4A/CDC6/KIF20A/ECT2/CENPA/KIF14/CIT/E2F8/ESPL1/KIF23/CEP55/KIF20B/BRCA2/PLK4/INCENP/RACGAP1/E2F7/PLK1/AURKB/PRC1/KIF4B	22
BP	GO:0045839	negative regulation of mitotic nuclear division	14/241	48/18800	7.25871e-16	3.25561e-14	2.7718e-14	TRIP13/NDC80/FBXO5/TTK/CENPF/ZWINT/CCNB1/CHEK1/BUB1B/MAD2L1/PLK1/BUB1/AURKB/KNTC1	14
BP	GO:2001251	negative regulation of chromosome organization	17/241	89/18800	1.29164e-15	5.67243e-14	4.82947e-14	TRIP13/MCM2/NDC80/FBXO5/TTK/CENPF/ZWINT/TOP2A/CCNB1/ESPL1/PIF1/BUB1B/MAD2L1/PLK1/BUB1/AURKB/KNTC1	17
BP	GO:0045841	negative regulation of mitotic metaphase/anaphase transition	13/241	40/18800	1.61593e-15	6.9518e-14	5.91872e-14	TRIP13/NDC80/FBXO5/TTK/CENPF/ZWINT/CCNB1/BUB1B/MAD2L1/PLK1/BUB1/AURKB/KNTC1	13
BP	GO:1902100	negative regulation of metaphase/anaphase transition of cell cycle	13/241	42/18800	3.35011e-15	1.41241e-13	1.20251e-13	TRIP13/NDC80/FBXO5/TTK/CENPF/ZWINT/CCNB1/BUB1B/MAD2L1/PLK1/BUB1/AURKB/KNTC1	13
BP	GO:0033046	negative regulation of sister chromatid segregation	13/241	43/18800	4.74773e-15	1.88834e-13	1.60772e-13	TRIP13/NDC80/FBXO5/TTK/CENPF/ZWINT/CCNB1/BUB1B/MAD2L1/PLK1/BUB1/AURKB/KNTC1	13
BP	GO:0033048	negative regulation of mitotic sister chromatid segregation	13/241	43/18800	4.74773e-15	1.88834e-13	1.60772e-13	TRIP13/NDC80/FBXO5/TTK/CENPF/ZWINT/CCNB1/BUB1B/MAD2L1/PLK1/BUB1/AURKB/KNTC1	13
BP	GO:2000816	negative regulation of mitotic sister chromatid separation	13/241	43/18800	4.74773e-15	1.88834e-13	1.60772e-13	TRIP13/NDC80/FBXO5/TTK/CENPF/ZWINT/CCNB1/BUB1B/MAD2L1/PLK1/BUB1/AURKB/KNTC1	13
BP	GO:0051985	negative regulation of chromosome segregation	13/241	45/18800	9.264e-15	3.55064e-13	3.02299e-13	TRIP13/NDC80/FBXO5/TTK/CENPF/ZWINT/CCNB1/BUB1B/MAD2L1/PLK1/BUB1/AURKB/KNTC1	13
BP	GO:1905819	negative regulation of chromosome separation	13/241	45/18800	9.264e-15	3.55064e-13	3.02299e-13	TRIP13/NDC80/FBXO5/TTK/CENPF/ZWINT/CCNB1/BUB1B/MAD2L1/PLK1/BUB1/AURKB/KNTC1	13
BP	GO:0061982	meiosis I cell cycle process	19/241	136/18800	1.10125e-14	4.14544e-13	3.5294e-13	RAD51/TRIP13/NDC80/RAD54L/DMC1/CCNE1/RAD51AP1/FBXO5/PSMC3IP/TOP2A/ESPL1/BRCA2/FANCD2/EME1/CCNB2/CDC25C/CDC25A/PLK1/CCNE2	19
BP	GO:0033047	regulation of mitotic sister chromatid segregation	13/241	46/18800	1.2768e-14	4.72191e-13	4.0202e-13	TRIP13/NDC80/FBXO5/TTK/CENPF/ZWINT/CCNB1/BUB1B/MAD2L1/PLK1/BUB1/AURKB/KNTC1	13
BP	GO:0006261	DNA-templated DNA replication	20/241	159/18800	1.69155e-14	6.14792e-13	5.2343e-13	RAD51/POLQ/MCM10/MCM2/CDC45/CDC6/CDC7/GINS1/CCNE1/FBXO5/E2F8/POLN/BRCA2/GINS4/EME1/E2F7/CCNE2/ATAD5/BLM/WDHD1	20
BP	GO:0007094	mitotic spindle assembly checkpoint signaling	12/241	38/18800	3.01852e-14	1.04312e-12	8.88106e-13	TRIP13/NDC80/TTK/CENPF/ZWINT/CCNB1/BUB1B/MAD2L1/PLK1/BUB1/AURKB/KNTC1	12
BP	GO:0071173	spindle assembly checkpoint signaling	12/241	38/18800	3.01852e-14	1.04312e-12	8.88106e-13	TRIP13/NDC80/TTK/CENPF/ZWINT/CCNB1/BUB1B/MAD2L1/PLK1/BUB1/AURKB/KNTC1	12
BP	GO:0071174	mitotic spindle checkpoint signaling	12/241	38/18800	3.01852e-14	1.04312e-12	8.88106e-13	TRIP13/NDC80/TTK/CENPF/ZWINT/CCNB1/BUB1B/MAD2L1/PLK1/BUB1/AURKB/KNTC1	12
BP	GO:1902749	regulation of cell cycle G2/M phase transition	17/241	108/18800	3.78439e-14	1.28669e-12	1.09548e-12	BRCA1/CLSPN/CDC6/CDC7/FBXO5/CENPF/KIF14/CCNB1/DTL/CHEK1/CDC25C/CDC25A/PLK1/CDK1/ATAD5/AURKB/BLM	17
BP	GO:0031577	spindle checkpoint signaling	12/241	39/18800	4.31105e-14	1.44249e-12	1.22813e-12	TRIP13/NDC80/TTK/CENPF/ZWINT/CCNB1/BUB1B/MAD2L1/PLK1/BUB1/AURKB/KNTC1	12
BP	GO:0051310	metaphase plate congression	14/241	65/18800	7.56958e-14	2.49323e-12	2.12272e-12	SPAG5/NDC80/CENPF/KIF14/KIF18A/CCNB1/CDCA8/CENPE/KIF2C/NUF2/CDCA5/INCENP/AURKB/KIFC1	14
BP	GO:0045132	meiotic chromosome segregation	16/241	96/18800	8.59901e-14	2.78873e-12	2.3743e-12	TRIP13/DMC1/CCNE1/TTK/SMC4/NCAPH/PSMC3IP/TOP2A/ESPL1/NUF2/FANCD2/EME1/BUB1B/PLK1/BUB1/CCNE2	16
BP	GO:0010389	regulation of G2/M transition of mitotic cell cycle	16/241	97/18800	1.01814e-13	3.24076e-12	2.75916e-12	BRCA1/CLSPN/CDC6/CDC7/FBXO5/CENPF/KIF14/CCNB1/DTL/CHEK1/CDC25C/CDC25A/PLK1/CDK1/AURKB/BLM	16
BP	GO:0051303	establishment of chromosome localization	15/241	81/18800	1.03003e-13	3.24076e-12	2.75916e-12	SPAG5/NDC80/CENPF/KIF14/KIF18A/DLGAP5/CCNB1/CDCA8/CENPE/KIF2C/NUF2/CDCA5/INCENP/AURKB/KIFC1	15
BP	GO:0050000	chromosome localization	15/241	83/18800	1.5042e-13	4.66302e-12	3.97006e-12	SPAG5/NDC80/CENPF/KIF14/KIF18A/DLGAP5/CCNB1/CDCA8/CENPE/KIF2C/NUF2/CDCA5/INCENP/AURKB/KIFC1	15
BP	GO:0090307	mitotic spindle assembly	14/241	69/18800	1.83363e-13	5.60189e-12	4.76941e-12	TPX2/KIF4A/MYBL2/CDC20/NEK2/KIF23/KIF11/RACGAP1/KIF15/PLK1/AURKB/PRC1/KIF4B/KIFC1	14
BP	GO:0000281	mitotic cytokinesis	14/241	71/18800	2.79098e-13	8.40483e-12	7.15582e-12	ANLN/KIF4A/KIF20A/ECT2/CENPA/CIT/ESPL1/KIF23/CEP55/KIF20B/INCENP/RACGAP1/PLK1/KIF4B	14
BP	GO:1901989	positive regulation of cell cycle phase transition	17/241	123/18800	3.45259e-13	1.01415e-11	8.6344e-12	CDC6/CDC7/EZH2/FBXO5/STIL/DLGAP5/CCNB1/ESPL1/DTL/CDCA5/CDC25C/CDC25A/TERT/CDK1/RRM2/UBE2C/ATAD5	17
BP	GO:0051302	regulation of cell division	20/241	186/18800	3.46389e-13	1.01415e-11	8.6344e-12	ASPM/RBL1/CDC6/KIF20A/ECT2/KIF14/CIT/E2F8/HTR2B/KIF23/KIF20B/BRCA2/PLK4/RACGAP1/E2F7/PLK1/AURKB/KIF18B/BLM/PRC1	20
BP	GO:0032465	regulation of cytokinesis	15/241	91/18800	6.19144e-13	1.78789e-11	1.52219e-11	CDC6/KIF20A/ECT2/KIF14/CIT/E2F8/KIF23/KIF20B/BRCA2/PLK4/RACGAP1/E2F7/PLK1/AURKB/PRC1	15
BP	GO:0008608	attachment of spindle microtubules to kinetochore	11/241	37/18800	7.79343e-13	2.22008e-11	1.89016e-11	SPAG5/NDC80/ECT2/NEK2/CCNB1/CENPE/KIF2C/NUF2/SPC25/RACGAP1/AURKB	11
BP	GO:0007127	meiosis I	17/241	130/18800	8.72298e-13	2.45174e-11	2.08739e-11	RAD51/TRIP13/NDC80/RAD54L/DMC1/CCNE1/RAD51AP1/FBXO5/PSMC3IP/TOP2A/ESPL1/BRCA2/FANCD2/EME1/CCNB2/PLK1/CCNE2	17
BP	GO:0061640	cytoskeleton-dependent cytokinesis	15/241	100/18800	2.58282e-12	7.0709e-11	6.02012e-11	ANLN/KIF4A/KIF20A/ECT2/CENPA/CIT/ESPL1/KIF23/CEP55/KIF20B/INCENP/RACGAP1/PLK1/AURKB/KIF4B	15
BP	GO:1901992	positive regulation of mitotic cell cycle phase transition	15/241	100/18800	2.58282e-12	7.0709e-11	6.02012e-11	CDC6/CDC7/FBXO5/STIL/DLGAP5/CCNB1/ESPL1/DTL/CDCA5/CDC25C/CDC25A/TERT/CDK1/RRM2/UBE2C	15
BP	GO:0034508	centromere complex assembly	10/241	31/18800	3.48267e-12	9.41215e-11	8.01344e-11	CENPI/OIP5/CENPA/CENPF/HELLS/CENPK/HJURP/DLGAP5/CENPE/KNTC1	10
BP	GO:0044786	cell cycle DNA replication	11/241	43/18800	4.90014e-12	1.30753e-10	1.11322e-10	RAD51/MCM2/CDC45/CDC7/GINS1/FBXO5/E2F8/BRCA2/E2F7/ATAD5/BLM	11
BP	GO:0006310	DNA recombination	24/241	324/18800	5.02615e-12	1.32439e-10	1.12758e-10	BRCA1/RAD51/POLQ/TRIP13/MCM2/RAD54L/CDC45/CDC7/DMC1/RAD51AP1/POLN/PSMC3IP/TOP2A/BRCA2/PIF1/FANCD2/GINS4/CHEK1/EME1/EXO1/ATAD5/FANCB/XRCC2/BLM	24
BP	GO:0051383	kinetochore organization	9/241	23/18800	5.62766e-12	1.46458e-10	1.24693e-10	NDC80/SMC4/CENPA/CENPF/CENPK/DLGAP5/CENPE/NUF2/KNTC1	9
BP	GO:0006302	double-strand break repair	22/241	273/18800	7.74708e-12	1.99157e-10	1.69561e-10	BRCA1/RAD51/POLQ/TRIP13/MCM2/RAD54L/CDC45/CDC7/DMC1/FOXM1/RAD51AP1/POLN/BRCA2/FANCD2/CDCA5/GINS4/CHEK1/EME1/ESCO2/FANCB/XRCC2/BLM	22
BP	GO:0045931	positive regulation of mitotic cell cycle	16/241	128/18800	8.42985e-12	2.14098e-10	1.82282e-10	CDC6/CDC7/FBXO5/STIL/DLGAP5/CCNB1/ESPL1/BRCA2/DTL/CDCA5/CDC25C/CDC25A/TERT/CDK1/RRM2/UBE2C	16
BP	GO:0007080	mitotic metaphase plate congression	11/241	51/18800	3.70742e-11	9.30387e-10	7.92125e-10	NDC80/KIF14/KIF18A/CCNB1/CDCA8/CENPE/KIF2C/NUF2/CDCA5/AURKB/KIFC1	11
BP	GO:0051255	spindle midzone assembly	7/241	12/18800	3.9107e-11	9.69854e-10	8.25727e-10	KIF4A/KIF23/INCENP/RACGAP1/AURKB/PRC1/KIF4B	7
BP	GO:0070192	chromosome organization involved in meiotic cell cycle	12/241	72/18800	1.16624e-10	2.85864e-09	2.43383e-09	NCAPD2/RAD51/TRIP13/DMC1/CCNE1/SMC4/NCAPH/PSMC3IP/FANCD2/BUB1B/BUB1/CCNE2	12
BP	GO:0010639	negative regulation of organelle organization	23/241	356/18800	2.21446e-10	5.3656e-09	4.56823e-09	BRCA1/TRIP13/MCM2/NDC80/TPX2/FBXO5/TTK/CENPF/ZWINT/TOP2A/CCNB1/ESPL1/PIF1/CHEK1/FBXO43/BUB1B/CCNF/MAD2L1/PLK1/BUB1/AURKB/KNTC1/KIF24	23
BP	GO:0000724	double-strand break repair via homologous recombination	16/241	162/18800	3.07123e-10	7.35699e-09	6.26369e-09	BRCA1/RAD51/POLQ/MCM2/RAD54L/CDC45/CDC7/DMC1/RAD51AP1/POLN/BRCA2/GINS4/CHEK1/FANCB/XRCC2/BLM	16
BP	GO:0000725	recombinational repair	16/241	164/18800	3.68899e-10	8.73751e-09	7.43906e-09	BRCA1/RAD51/POLQ/MCM2/RAD54L/CDC45/CDC7/DMC1/RAD51AP1/POLN/BRCA2/GINS4/CHEK1/FANCB/XRCC2/BLM	16
BP	GO:0000079	regulation of cyclin-dependent protein serine/threonine kinase activity	13/241	98/18800	3.74144e-10	8.76327e-09	7.46099e-09	CDC6/CDKN3/CCNE1/PKMYT1/CCNB1/CCNA2/CCNB2/CDC25C/CCNF/CDC25A/PLK1/CCNE2/BLM	13
BP	GO:1904029	regulation of cyclin-dependent protein kinase activity	13/241	101/18800	5.49218e-10	1.27226e-08	1.08319e-08	CDC6/CDKN3/CCNE1/PKMYT1/CCNB1/CCNA2/CCNB2/CDC25C/CCNF/CDC25A/PLK1/CCNE2/BLM	13
BP	GO:0031570	DNA integrity checkpoint signaling	14/241	123/18800	6.20451e-10	1.42164e-08	1.21038e-08	BRCA1/GTSE1/WDR76/CLSPN/CDC45/CDC6/E2F1/DTL/FANCD2/CHEK1/EME1/PLK1/CDK1/BLM	14
BP	GO:0051231	spindle elongation	6/241	10/18800	8.39012e-10	1.90176e-08	1.61915e-08	KIF4A/KIF23/RACGAP1/AURKB/PRC1/KIF4B	6
BP	GO:0042770	signal transduction in response to DNA damage	16/241	174/18800	8.87911e-10	1.99119e-08	1.69528e-08	BRCA1/GTSE1/WDR76/CLSPN/E2F1/FOXM1/BRCA2/DTL/FANCD2/CHEK1/EME1/E2F7/PLK1/CDK1/ATAD5/BLM	16
BP	GO:0034502	protein localization to chromosome	12/241	93/18800	2.49442e-09	5.535e-08	4.71246e-08	NDC80/EZH2/TTK/CENPA/BRCA2/CDCA5/TERT/PLK1/CDK1/ESCO2/AURKB/KNTC1	12
BP	GO:1902751	positive regulation of cell cycle G2/M phase transition	8/241	31/18800	3.97148e-09	8.72072e-08	7.42476e-08	CDC7/FBXO5/CCNB1/DTL/CDC25C/CDC25A/CDK1/ATAD5	8
BP	GO:0001833	inner cell mass cell proliferation	6/241	13/18800	6.63804e-09	1.42786e-07	1.21567e-07	GINS1/SALL4/BRCA2/NCAPG2/GINS4/CHEK1	6
BP	GO:0051988	regulation of attachment of spindle microtubules to kinetochore	6/241	13/18800	6.63804e-09	1.42786e-07	1.21567e-07	SPAG5/ECT2/NEK2/CCNB1/RACGAP1/AURKB	6
BP	GO:0007143	female meiotic nuclear division	8/241	33/18800	6.83693e-09	1.45578e-07	1.23944e-07	TRIP13/NDC80/FBXO5/TTK/NCAPH/TOP2A/CCNB2/PLK1	8
BP	GO:0065004	protein-DNA complex assembly	16/241	203/18800	8.35383e-09	1.76099e-07	1.49929e-07	RAD51/MCM2/CDC45/DMC1/CENPI/OIP5/ASF1B/CENPA/CENPF/HELLS/CENPK/HJURP/DLGAP5/CENPE/CHAF1B/KNTC1	16
BP	GO:0051052	regulation of DNA metabolic process	24/241	472/18800	1.04371e-08	2.17835e-07	1.85463e-07	BRCA1/RAD51/POLQ/CDC6/CDC7/GINS1/FOXM1/RAD51AP1/FBXO5/NEK2/E2F8/BRCA2/PIF1/CCNA2/GINS4/CHEK1/E2F7/CDK1/ESCO2/ATAD5/AURKB/FANCB/ZNF93/BLM	24
BP	GO:0030261	chromosome condensation	9/241	49/18800	1.05867e-08	2.18791e-07	1.86277e-07	NCAPD2/NCAPG/SMC4/NCAPH/TOP2A/CDCA5/NCAPG2/PLK1/CDK1	9
BP	GO:0044774	mitotic DNA integrity checkpoint signaling	11/241	85/18800	1.13246e-08	2.31769e-07	1.97326e-07	BRCA1/GTSE1/CLSPN/CDC6/DTL/FANCD2/CHEK1/EME1/PLK1/CDK1/BLM	11
BP	GO:0006275	regulation of DNA replication	13/241	131/18800	1.39178e-08	2.79417e-07	2.37894e-07	CDC6/CDC7/GINS1/FBXO5/E2F8/BRCA2/CCNA2/GINS4/E2F7/CDK1/ESCO2/ATAD5/BLM	13
BP	GO:0007098	centrosome cycle	13/241	131/18800	1.39178e-08	2.79417e-07	2.37894e-07	BRCA1/WDR62/NDC80/NEK2/STIL/KIF11/BRCA2/PLK4/CHEK1/CCNF/PLK1/CDK1/XRCC2	13
BP	GO:0051445	regulation of meiotic cell cycle	9/241	51/18800	1.53316e-08	3.04897e-07	2.59587e-07	ASPM/TRIP13/RAD51AP1/FBXO5/TTK/CDC20/FBXO43/CDC25C/CDC25A	9
BP	GO:0032508	DNA duplex unwinding	11/241	90/18800	2.08752e-08	4.1126e-07	3.50144e-07	RAD51/POLQ/MCM2/RAD54L/CDC45/GINS1/TOP2A/PIF1/GINS4/ERCC6L/BLM	11
BP	GO:0033260	nuclear DNA replication	8/241	38/18800	2.27865e-08	4.44759e-07	3.78665e-07	RAD51/MCM2/CDC45/CDC7/GINS1/BRCA2/ATAD5/BLM	8
BP	GO:0000077	DNA damage checkpoint signaling	12/241	115/18800	2.88031e-08	5.57037e-07	4.74257e-07	BRCA1/GTSE1/WDR76/CLSPN/E2F1/DTL/FANCD2/CHEK1/EME1/PLK1/CDK1/BLM	12
BP	GO:0032392	DNA geometric change	11/241	96/18800	4.13601e-08	7.92609e-07	6.74822e-07	RAD51/POLQ/MCM2/RAD54L/CDC45/GINS1/TOP2A/PIF1/GINS4/ERCC6L/BLM	11
BP	GO:0007131	reciprocal meiotic recombination	9/241	57/18800	4.24063e-08	7.98148e-07	6.79538e-07	RAD51/TRIP13/RAD54L/DMC1/RAD51AP1/PSMC3IP/TOP2A/FANCD2/EME1	9
BP	GO:0140527	reciprocal homologous recombination	9/241	57/18800	4.24063e-08	7.98148e-07	6.79538e-07	RAD51/TRIP13/RAD54L/DMC1/RAD51AP1/PSMC3IP/TOP2A/FANCD2/EME1	9
BP	GO:0031023	microtubule organizing center organization	13/241	145/18800	4.72758e-08	8.81923e-07	7.50863e-07	BRCA1/WDR62/NDC80/NEK2/STIL/KIF11/BRCA2/PLK4/CHEK1/CCNF/PLK1/CDK1/XRCC2	13
BP	GO:0010971	positive regulation of G2/M transition of mitotic cell cycle	7/241	28/18800	4.90793e-08	9.07537e-07	7.72671e-07	CDC7/FBXO5/CCNB1/DTL/CDC25C/CDC25A/CDK1	7
BP	GO:0032467	positive regulation of cytokinesis	8/241	42/18800	5.26184e-08	9.64518e-07	8.21184e-07	CDC6/ECT2/KIF14/CIT/KIF23/KIF20B/RACGAP1/AURKB	8
BP	GO:0035825	homologous recombination	9/241	59/18800	5.79259e-08	1.05265e-06	8.96221e-07	RAD51/TRIP13/RAD54L/DMC1/RAD51AP1/PSMC3IP/TOP2A/FANCD2/EME1	9
BP	GO:0051382	kinetochore assembly	6/241	18/18800	6.80508e-08	1.22608e-06	1.04387e-06	CENPA/CENPF/CENPK/DLGAP5/CENPE/KNTC1	6
BP	GO:0071824	protein-DNA complex subunit organization	16/241	237/18800	7.39629e-08	1.3213e-06	1.12495e-06	RAD51/MCM2/CDC45/DMC1/CENPI/OIP5/ASF1B/CENPA/CENPF/HELLS/CENPK/HJURP/DLGAP5/CENPE/CHAF1B/KNTC1	16
BP	GO:0044773	mitotic DNA damage checkpoint signaling	10/241	81/18800	8.41949e-08	1.49145e-06	1.26981e-06	BRCA1/GTSE1/CLSPN/DTL/FANCD2/CHEK1/EME1/PLK1/CDK1/BLM	10
BP	GO:0071103	DNA conformation change	11/241	103/18800	8.64602e-08	1.51882e-06	1.29311e-06	RAD51/POLQ/MCM2/RAD54L/CDC45/GINS1/TOP2A/PIF1/GINS4/ERCC6L/BLM	11
BP	GO:0010972	negative regulation of G2/M transition of mitotic cell cycle	9/241	62/18800	9.04462e-08	1.57571e-06	1.34155e-06	BRCA1/CLSPN/CDC6/DTL/CHEK1/PLK1/CDK1/AURKB/BLM	9
BP	GO:0007076	mitotic chromosome condensation	6/241	19/18800	9.83953e-08	1.70014e-06	1.44749e-06	NCAPD2/NCAPG/SMC4/NCAPH/CDCA5/PLK1	6
BP	GO:1902750	negative regulation of cell cycle G2/M phase transition	9/241	64/18800	1.20084e-07	2.05803e-06	1.75219e-06	BRCA1/CLSPN/CDC6/DTL/CHEK1/PLK1/CDK1/AURKB/BLM	9
BP	GO:0044818	mitotic G2/M transition checkpoint	8/241	48/18800	1.57439e-07	2.67646e-06	2.27872e-06	BRCA1/CLSPN/CDC6/DTL/CHEK1/PLK1/CDK1/BLM	8
BP	GO:0001832	blastocyst growth	6/241	21/18800	1.92605e-07	3.24809e-06	2.7654e-06	GINS1/SALL4/BRCA2/NCAPG2/GINS4/CHEK1	6
BP	GO:0044843	cell cycle G1/S phase transition	16/241	255/18800	2.0192e-07	3.37816e-06	2.87614e-06	GTSE1/RBL1/CDC6/CDC7/CDKN3/E2F1/CCNE1/EZH2/KIF14/STIL/CCNA2/CDC25A/TERT/E2F7/RRM2/CCNE2	16
BP	GO:0000082	G1/S transition of mitotic cell cycle	15/241	225/18800	2.24736e-07	3.73027e-06	3.17593e-06	GTSE1/RBL1/CDC6/CDC7/CDKN3/E2F1/CCNE1/EZH2/KIF14/STIL/CDC25A/TERT/E2F7/RRM2/CCNE2	15
BP	GO:0044771	meiotic cell cycle phase transition	5/241	12/18800	2.44436e-07	4.02556e-06	3.42733e-06	NDC80/TTK/CCNB2/CDC25C/CDC25A	5
BP	GO:0007095	mitotic G2 DNA damage checkpoint signaling	7/241	35/18800	2.58224e-07	4.21966e-06	3.59259e-06	BRCA1/CLSPN/DTL/CHEK1/PLK1/CDK1/BLM	7
BP	GO:0006268	DNA unwinding involved in DNA replication	6/241	22/18800	2.62001e-07	4.24845e-06	3.61711e-06	RAD51/MCM2/CDC45/GINS1/GINS4/BLM	6
BP	GO:0051656	establishment of organelle localization	20/241	404/18800	2.85904e-07	4.60066e-06	3.91697e-06	SPAG5/NDC80/CENPA/CENPF/KIF14/KIF18A/GPSM2/DLGAP5/CCNB1/CDCA8/ESPL1/CENPE/KIF2C/NUF2/CDCA5/INCENP/MAD2L1/PLK1/AURKB/KIFC1	20
BP	GO:0090329	regulation of DNA-templated DNA replication	8/241	52/18800	3.00416e-07	4.79756e-06	4.08461e-06	CDC7/GINS1/FBXO5/E2F8/BRCA2/GINS4/E2F7/BLM	8
BP	GO:0032506	cytokinetic process	7/241	39/18800	5.65409e-07	8.96152e-06	7.62978e-06	ANLN/KIF20A/ECT2/CEP55/KIF20B/RACGAP1/AURKB	7
BP	GO:0071459	protein localization to chromosome, centromeric region	6/241	25/18800	6.02161e-07	9.44761e-06	8.04363e-06	NDC80/TTK/CENPA/CDK1/AURKB/KNTC1	6
BP	GO:1902969	mitotic DNA replication	5/241	14/18800	6.05042e-07	9.44761e-06	8.04363e-06	RAD51/MCM2/CDC45/GINS1/BRCA2	5
BP	GO:0001701	in utero embryonic development	19/241	387/18800	6.49456e-07	1.00666e-05	8.57061e-06	C6/GINS1/SALL4/ASF1B/NEK2/STIL/E2F8/CCNB1/TET1/BRCA2/PLK4/NCAPG2/GINS4/CHEK1/CCNB2/E2F7/TMEM100/RRM2/XRCC2	19
BP	GO:0000212	meiotic spindle organization	5/241	15/18800	8.98088e-07	1.37186e-05	1.16799e-05	ASPM/NDC80/FBXO5/ESPL1/CCNB2	5
BP	GO:0051315	attachment of mitotic spindle microtubules to kinetochore	5/241	15/18800	8.98088e-07	1.37186e-05	1.16799e-05	NDC80/CENPE/KIF2C/NUF2/AURKB	5
BP	GO:0007062	sister chromatid cohesion	8/241	63/18800	1.36944e-06	2.07682e-05	1.76819e-05	SMC1B/CDC20/ESPL1/CDCA5/BUB1B/PLK1/BUB1/ESCO2	8
BP	GO:0045143	homologous chromosome segregation	8/241	65/18800	1.74583e-06	2.62872e-05	2.23807e-05	TRIP13/DMC1/CCNE1/PSMC3IP/ESPL1/FANCD2/PLK1/CCNE2	8
BP	GO:0001824	blastocyst development	10/241	113/18800	1.94554e-06	2.90865e-05	2.4764e-05	GINS1/SALL4/ASF1B/NEK2/TET1/BRCA2/NCAPG2/GINS4/CHEK1/RRM2	10
BP	GO:0051781	positive regulation of cell division	9/241	89/18800	2.09889e-06	3.11582e-05	2.65279e-05	CDC6/ECT2/KIF14/CIT/HTR2B/KIF23/KIF20B/RACGAP1/AURKB	9
BP	GO:0051782	negative regulation of cell division	5/241	18/18800	2.48301e-06	3.66026e-05	3.11632e-05	ASPM/E2F8/E2F7/AURKB/BLM	5
BP	GO:0034501	protein localization to kinetochore	5/241	19/18800	3.33465e-06	4.84789e-05	4.12746e-05	NDC80/TTK/CDK1/AURKB/KNTC1	5
BP	GO:1903083	protein localization to condensed chromosome	5/241	19/18800	3.33465e-06	4.84789e-05	4.12746e-05	NDC80/TTK/CDK1/AURKB/KNTC1	5
BP	GO:0040001	establishment of mitotic spindle localization	6/241	35/18800	4.95749e-06	7.15781e-05	6.09411e-05	NDC80/CENPA/GPSM2/ESPL1/MAD2L1/PLK1	6
BP	GO:0051653	spindle localization	7/241	55/18800	6.26625e-06	8.94802e-05	7.61828e-05	ASPM/NDC80/CENPA/GPSM2/ESPL1/MAD2L1/PLK1	7
BP	GO:0007292	female gamete generation	11/241	158/18800	6.28229e-06	8.94802e-05	7.61828e-05	ASPM/TRIP13/NDC80/DMC1/FBXO5/TTK/NCAPH/TOP2A/BRCA2/CCNB2/PLK1	11
BP	GO:0000723	telomere maintenance	10/241	132/18800	7.90869e-06	0.000111588	9.50052e-05	RAD51/CCNE1/NEK2/BRCA2/PIF1/TERT/EXO1/CCNE2/AURKB/BLM	10
BP	GO:0032200	telomere organization	11/241	162/18800	7.97953e-06	0.000111588	9.50052e-05	RAD51/CCNE1/EZH2/NEK2/BRCA2/PIF1/TERT/EXO1/CCNE2/AURKB/BLM	11
BP	GO:0071897	DNA biosynthetic process	12/241	194/18800	8.03931e-06	0.000111588	9.50052e-05	POLQ/GINS1/NEK2/CENPF/POLN/PIF1/DTL/GINS4/CHEK1/TERT/TYMS/AURKB	12
BP	GO:0051054	positive regulation of DNA metabolic process	14/241	263/18800	8.049e-06	0.000111588	9.50052e-05	BRCA1/RAD51/CDC7/GINS1/FOXM1/RAD51AP1/NEK2/E2F8/GINS4/E2F7/CDK1/ATAD5/AURKB/FANCB	14
BP	GO:0060623	regulation of chromosome condensation	4/241	11/18800	8.09913e-06	0.000111588	9.50052e-05	NCAPD2/NCAPG/SMC4/NCAPH	4
BP	GO:0006270	DNA replication initiation	6/241	38/18800	8.16501e-06	0.000111765	9.51562e-05	MCM10/MCM2/CDC45/CDC6/CCNE1/CCNE2	6
BP	GO:1904666	regulation of ubiquitin protein ligase activity	5/241	24/18800	1.15672e-05	0.000157315	0.000133937	FBXO5/CDC20/MAD2L1/PLK1/UBE2C	5
BP	GO:0000727	double-strand break repair via break-induced replication	4/241	12/18800	1.20265e-05	0.000162512	0.000138361	MCM2/CDC45/CDC7/GINS4	4
BP	GO:0051307	meiotic chromosome separation	5/241	25/18800	1.43085e-05	0.000192117	0.000163567	TTK/NCAPH/TOP2A/ESPL1/EME1	5
BP	GO:0010212	response to ionizing radiation	10/241	142/18800	1.50566e-05	0.000200882	0.00017103	BRCA1/RAD51/RAD54L/RAD51AP1/ECT2/BARD1/BRCA2/FANCD2/XRCC2/BLM	10
BP	GO:0007144	female meiosis I	4/241	13/18800	1.71969e-05	0.000227994	0.000194112	TRIP13/NDC80/FBXO5/CCNB2	4
BP	GO:0032886	regulation of microtubule-based process	13/241	249/18800	2.08711e-05	0.000274977	0.000234114	BRCA1/WDR62/SPAG5/TPX2/KIF18A/GPSM2/STIL/PLK4/SKA1/CCNF/KIF15/SKA3/PLK1	13
BP	GO:0071900	regulation of protein serine/threonine kinase activity	16/241	372/18800	2.62694e-05	0.00034395	0.000292837	CDC6/CDKN3/CCNE1/EZH2/PKMYT1/CCNB1/HTR2B/CCNA2/INCENP/CCNB2/CDC25C/CCNF/CDC25A/PLK1/CCNE2/BLM	16
BP	GO:0071478	cellular response to radiation	11/241	187/18800	3.06512e-05	0.000398843	0.000339573	BRCA1/RAD51/RAD51AP1/ECT2/BARD1/BRCA2/CHEK1/CDC25A/PBK/AURKB/BLM	11
BP	GO:0000132	establishment of mitotic spindle orientation	5/241	30/18800	3.64234e-05	0.000471046	0.000401045	NDC80/CENPA/GPSM2/MAD2L1/PLK1	5
BP	GO:0051293	establishment of spindle localization	6/241	50/18800	4.13358e-05	0.000531316	0.000452359	NDC80/CENPA/GPSM2/ESPL1/MAD2L1/PLK1	6
BP	GO:2000045	regulation of G1/S transition of mitotic cell cycle	10/241	160/18800	4.21772e-05	0.000538845	0.000458769	GTSE1/RBL1/CDC6/E2F1/EZH2/KIF14/STIL/TERT/E2F7/RRM2	10
BP	GO:0051447	negative regulation of meiotic cell cycle	4/241	16/18800	4.24675e-05	0.000539286	0.000459145	TRIP13/FBXO5/TTK/FBXO43	4
BP	GO:0051298	centrosome duplication	7/241	74/18800	4.52023e-05	0.000570577	0.000485786	BRCA1/WDR62/NDC80/STIL/BRCA2/PLK4/CCNF	7
BP	GO:0071479	cellular response to ionizing radiation	7/241	75/18800	4.93174e-05	0.000618816	0.000526856	BRCA1/RAD51/RAD51AP1/ECT2/BARD1/BRCA2/BLM	7
BP	GO:0036297	interstrand cross-link repair	5/241	32/18800	5.04057e-05	0.000625031	0.000532147	RAD51/NEIL3/RAD51AP1/POLN/FANCD2	5
BP	GO:0040020	regulation of meiotic nuclear division	5/241	32/18800	5.04057e-05	0.000625031	0.000532147	TRIP13/RAD51AP1/FBXO5/CDC20/FBXO43	5
BP	GO:0007018	microtubule-based movement	16/241	395/18800	5.38889e-05	0.000664314	0.000565593	KIF4A/KIF20A/KIF14/KIF18A/DLGAP5/KIF23/KIF11/KIF20B/MNS1/CENPE/KIF2C/KIF15/KIF18B/KIF24/KIF4B/KIFC1	16
BP	GO:0007129	homologous chromosome pairing at meiosis	6/241	53/18800	5.78348e-05	0.000708812	0.000603478	TRIP13/DMC1/CCNE1/PSMC3IP/FANCD2/CCNE2	6
BP	GO:0007096	regulation of exit from mitosis	4/241	18/18800	6.99751e-05	0.000852644	0.000725936	ANLN/CDCA5/UBE2C/KNTC1	4
BP	GO:0051438	regulation of ubiquitin-protein transferase activity	6/241	56/18800	7.92167e-05	0.000959706	0.000817087	FBXO5/CDC20/BUB1B/MAD2L1/PLK1/UBE2C	6
BP	GO:0051294	establishment of spindle orientation	5/241	36/18800	9.05046e-05	0.001084	0.000922909	NDC80/CENPA/GPSM2/MAD2L1/PLK1	5
BP	GO:0071312	cellular response to alkaloid	5/241	36/18800	9.05046e-05	0.001084	0.000922909	RAD51/CCNA2/CRHBP/CHEK1/BLM	5
BP	GO:0051053	negative regulation of DNA metabolic process	9/241	148/18800	0.000125833	0.00149862	0.00127592	POLQ/CDC6/FBXO5/BRCA2/PIF1/CHEK1/FANCB/ZNF93/BLM	9
BP	GO:0045740	positive regulation of DNA replication	5/241	40/18800	0.000151515	0.00179435	0.0015277	CDC7/E2F8/E2F7/CDK1/ATAD5	5
BP	GO:0051444	negative regulation of ubiquitin-protein transferase activity	4/241	22/18800	0.000160668	0.00189212	0.00161094	FBXO5/CDC20/BUB1B/MAD2L1	4
BP	GO:1902806	regulation of cell cycle G1/S phase transition	10/241	188/18800	0.000161823	0.00189513	0.0016135	GTSE1/RBL1/CDC6/E2F1/EZH2/KIF14/STIL/TERT/E2F7/RRM2	10
BP	GO:0031109	microtubule polymerization or depolymerization	8/241	123/18800	0.000188396	0.00219414	0.00186808	TPX2/FBXO5/KIF18A/KIF2C/SKA1/SKA3/KIF18B/KIF24	8
BP	GO:0090224	regulation of spindle organization	5/241	43/18800	0.000214832	0.00248827	0.0021185	SPAG5/TPX2/GPSM2/KIF15/PLK1	5
BP	GO:1901993	regulation of meiotic cell cycle phase transition	3/241	10/18800	0.000233587	0.00269072	0.00229086	TTK/CDC25C/CDC25A	3
BP	GO:0016572	histone phosphorylation	5/241	45/18800	0.000267054	0.00305951	0.00260484	CCNA2/INCENP/CHEK1/CDK1/AURKB	5
BP	GO:0007019	microtubule depolymerization	5/241	46/18800	0.00029652	0.00337872	0.00287662	TPX2/KIF18A/KIF2C/KIF18B/KIF24	5
BP	GO:0031055	chromatin remodeling at centromere	3/241	11/18800	0.000318145	0.00358636	0.0030534	OIP5/HELLS/HJURP	3
BP	GO:1904668	positive regulation of ubiquitin protein ligase activity	3/241	11/18800	0.000318145	0.00358636	0.0030534	CDC20/PLK1/UBE2C	3
BP	GO:0072331	signal transduction by p53 class mediator	9/241	170/18800	0.000355003	0.00398057	0.00338903	E2F2/GTSE1/E2F1/FOXM1/BRCA2/CHEK1/E2F7/ATAD5/AURKB	9
BP	GO:0001556	oocyte maturation	4/241	27/18800	0.000366565	0.00408846	0.00348088	TRIP13/DMC1/FBXO5/BRCA2	4
BP	GO:2000241	regulation of reproductive process	9/241	176/18800	0.000457443	0.00507521	0.004321	ASPM/TRIP13/RAD51AP1/FBXO5/TTK/CDC20/FBXO43/CDC25C/CDC25A	9
BP	GO:0090169	regulation of spindle assembly	4/241	29/18800	0.000486217	0.00536621	0.00456876	SPAG5/GPSM2/KIF15/PLK1	4
BP	GO:0046605	regulation of centrosome cycle	5/241	52/18800	0.000528214	0.00579935	0.00493753	BRCA1/WDR62/STIL/PLK4/CCNF	5
BP	GO:0010458	exit from mitosis	4/241	30/18800	0.000555417	0.0060545	0.00515476	ANLN/CDCA5/UBE2C/KNTC1	4
BP	GO:0009314	response to radiation	15/241	438/18800	0.000557198	0.0060545	0.00515476	BRCA1/RAD51/RAD54L/RAD51AP1/ECT2/BARD1/BRCA2/DTL/FANCD2/CHEK1/CDC25A/PBK/AURKB/XRCC2/BLM	15
BP	GO:0007100	mitotic centrosome separation	3/241	14/18800	0.000682148	0.00729933	0.0062146	NEK2/KIF11/CHEK1	3
BP	GO:0051984	positive regulation of chromosome segregation	3/241	14/18800	0.000682148	0.00729933	0.0062146	CDC6/CCNB1/AURKB	3
BP	GO:2000105	positive regulation of DNA-templated DNA replication	3/241	14/18800	0.000682148	0.00729933	0.0062146	CDC7/E2F8/E2F7	3
BP	GO:0008156	negative regulation of DNA replication	4/241	32/18800	0.000714323	0.00749151	0.00637822	CDC6/FBXO5/BRCA2/BLM	4
BP	GO:0010165	response to X-ray	4/241	32/18800	0.000714323	0.00749151	0.00637822	RAD51/BRCA2/XRCC2/BLM	4
BP	GO:0051642	centrosome localization	4/241	32/18800	0.000714323	0.00749151	0.00637822	ASPM/GPSM2/DLGAP5/MAD2L1	4
BP	GO:0071168	protein localization to chromatin	4/241	32/18800	0.000714323	0.00749151	0.00637822	EZH2/CDCA5/PLK1/ESCO2	4
BP	GO:0070507	regulation of microtubule cytoskeleton organization	8/241	152/18800	0.000780909	0.00814929	0.00693825	SPAG5/TPX2/KIF18A/GPSM2/SKA1/KIF15/SKA3/PLK1	8
BP	GO:0022412	cellular process involved in reproduction in multicellular organism	14/241	406/18800	0.000793224	0.00823702	0.00701295	ASPM/TRIP13/NDC80/DMC1/FBXO5/PACRG/TTK/NCAPH/KIF18A/TOP2A/MNS1/BRCA2/CCNB2/PLK1	14
BP	GO:0061842	microtubule organizing center localization	4/241	33/18800	0.000804742	0.00831567	0.0070799	ASPM/GPSM2/DLGAP5/MAD2L1	4
BP	GO:0051299	centrosome separation	3/241	15/18800	0.000844642	0.00860147	0.00732323	NEK2/KIF11/CHEK1	3
BP	GO:0060707	trophoblast giant cell differentiation	3/241	15/18800	0.000844642	0.00860147	0.00732323	E2F8/PLK4/E2F7	3
BP	GO:2000104	negative regulation of DNA-templated DNA replication	3/241	15/18800	0.000844642	0.00860147	0.00732323	FBXO5/BRCA2/BLM	3
BP	GO:0006304	DNA modification	7/241	119/18800	0.00086498	0.00876623	0.00746351	BRCA1/DNMT3B/EZH2/NEIL3/HELLS/TET1/APOBEC3B	7
BP	GO:1901976	regulation of cell cycle checkpoint	4/241	34/18800	0.000902946	0.00910723	0.00775383	NDC80/WDR76/CCNB1/MAD2L1	4
BP	GO:2001252	positive regulation of chromosome organization	6/241	89/18800	0.000998149	0.0100195	0.00853055	NCAPD2/NCAPG/SMC4/NEK2/NCAPH/AURKB	6
BP	GO:1902115	regulation of organelle assembly	9/241	202/18800	0.00122036	0.0121444	0.0103397	BRCA1/SPAG5/GPSM2/STIL/MNS1/PLK4/KIF15/PLK1/KIF24	9
BP	GO:0000076	DNA replication checkpoint signaling	3/241	17/18800	0.00123864	0.0121444	0.0103397	CLSPN/CDC45/CDC6	3
BP	GO:0090231	regulation of spindle checkpoint	3/241	17/18800	0.00123864	0.0121444	0.0103397	NDC80/CCNB1/MAD2L1	3
BP	GO:0090266	regulation of mitotic cell cycle spindle assembly checkpoint	3/241	17/18800	0.00123864	0.0121444	0.0103397	NDC80/CCNB1/MAD2L1	3
BP	GO:1903504	regulation of mitotic spindle checkpoint	3/241	17/18800	0.00123864	0.0121444	0.0103397	NDC80/CCNB1/MAD2L1	3
BP	GO:2001020	regulation of response to DNA damage stimulus	10/241	246/18800	0.00132689	0.0129494	0.0110251	BRCA1/RAD51/POLQ/WDR76/FOXM1/RAD51AP1/FBXO5/CHEK1/ATAD5/FANCB	10
BP	GO:0031145	anaphase-promoting complex-dependent catabolic process	3/241	18/18800	0.00147237	0.0143031	0.0121775	CDC20/PLK1/UBE2C	3
BP	GO:0000018	regulation of DNA recombination	7/241	131/18800	0.00151453	0.0146451	0.0124687	RAD51/POLQ/RAD51AP1/CHEK1/ATAD5/FANCB/BLM	7
BP	GO:0060236	regulation of mitotic spindle organization	4/241	39/18800	0.00152326	0.0146623	0.0124834	TPX2/GPSM2/KIF15/PLK1	4
BP	GO:1902808	positive regulation of cell cycle G1/S phase transition	5/241	66/18800	0.00157106	0.0150536	0.0128165	CDC6/EZH2/STIL/TERT/RRM2	5
BP	GO:0044728	DNA methylation or demethylation	6/241	98/18800	0.00164376	0.0156789	0.0133489	BRCA1/DNMT3B/EZH2/HELLS/TET1/APOBEC3B	6
BP	GO:0071392	cellular response to estradiol stimulus	4/241	40/18800	0.00167568	0.0159114	0.0135469	KIF18A/RAMP3/CCNA2/CRHBP	4
BP	GO:0031297	replication fork processing	4/241	41/18800	0.00183837	0.017378	0.0147955	RAD51/BRCA2/EME1/BLM	4
BP	GO:0007099	centriole replication	4/241	42/18800	0.00201169	0.0189315	0.0161181	BRCA1/WDR62/STIL/PLK4	4
BP	GO:0010569	regulation of double-strand break repair via homologous recombination	5/241	70/18800	0.00204148	0.0191264	0.016284	RAD51/POLQ/RAD51AP1/CHEK1/FANCB	5
BP	GO:0007063	regulation of sister chromatid cohesion	3/241	21/18800	0.00233276	0.0216628	0.0184435	ESPL1/CDCA5/BUB1	3
BP	GO:2000773	negative regulation of cellular senescence	3/241	21/18800	0.00233276	0.0216628	0.0184435	RBL1/FBXO5/TERT	3
BP	GO:0098534	centriole assembly	4/241	46/18800	0.00281814	0.0260554	0.0221834	BRCA1/WDR62/STIL/PLK4	4
BP	GO:2000779	regulation of double-strand break repair	6/241	110/18800	0.00294665	0.0271246	0.0230937	RAD51/POLQ/FOXM1/RAD51AP1/CHEK1/FANCB	6
BP	GO:0046599	regulation of centriole replication	3/241	23/18800	0.00304819	0.0277106	0.0235926	BRCA1/STIL/PLK4	3
BP	GO:1902410	mitotic cytokinetic process	3/241	23/18800	0.00304819	0.0277106	0.0235926	KIF20A/CEP55/KIF20B	3
BP	GO:0010824	regulation of centrosome duplication	4/241	47/18800	0.00304975	0.0277106	0.0235926	BRCA1/STIL/PLK4/CCNF	4
BP	GO:0071214	cellular response to abiotic stimulus	11/241	323/18800	0.00312276	0.0281315	0.023951	BRCA1/RAD51/RAD51AP1/ECT2/BARD1/BRCA2/CHEK1/CDC25A/PBK/AURKB/BLM	11
BP	GO:0104004	cellular response to environmental stimulus	11/241	323/18800	0.00312276	0.0281315	0.023951	BRCA1/RAD51/RAD51AP1/ECT2/BARD1/BRCA2/CHEK1/CDC25A/PBK/AURKB/BLM	11
BP	GO:0048146	positive regulation of fibroblast proliferation	4/241	48/18800	0.00329402	0.029548	0.025157	CDC6/E2F1/CCNB1/CCNA2	4
BP	GO:0006282	regulation of DNA repair	7/241	152/18800	0.00350254	0.0312854	0.0266362	BRCA1/RAD51/POLQ/FOXM1/RAD51AP1/CHEK1/FANCB	7
BP	GO:0045005	DNA-templated DNA replication maintenance of fidelity	4/241	49/18800	0.00355128	0.0315869	0.0268929	RAD51/BRCA2/EME1/BLM	4
BP	GO:1902117	positive regulation of organelle assembly	5/241	80/18800	0.00365765	0.0323963	0.027582	SPAG5/GPSM2/STIL/MNS1/PLK4	5
BP	GO:0031062	positive regulation of histone methylation	4/241	50/18800	0.00382185	0.0335686	0.0285801	BRCA1/DNMT3B/MYB/TET1	4
BP	GO:0061647	histone H3-K9 modification	4/241	50/18800	0.00382185	0.0335686	0.0285801	BRCA1/DNMT3B/MYB/CHEK1	4
BP	GO:0010833	telomere maintenance via telomere lengthening	5/241	81/18800	0.00385836	0.0337487	0.0287334	RAD51/NEK2/PIF1/TERT/AURKB	5
BP	GO:0051570	regulation of histone H3-K9 methylation	3/241	25/18800	0.0038848	0.0338395	0.0288107	BRCA1/DNMT3B/MYB	3
BP	GO:0007140	male meiotic nuclear division	4/241	51/18800	0.00410606	0.0356197	0.0303263	TRIP13/DMC1/KIF18A/BRCA2	4
BP	GO:0010638	positive regulation of organelle organization	14/241	487/18800	0.00423481	0.036586	0.0311491	NCAPD2/SPAG5/NCAPG/RAD51AP1/SMC4/NEK2/NCAPH/GPSM2/STIL/DLGAP5/ESPL1/MNS1/PLK4/AURKB	14
BP	GO:2000278	regulation of DNA biosynthetic process	6/241	119/18800	0.00434227	0.0369781	0.0314829	GINS1/NEK2/PIF1/GINS4/CHEK1/AURKB	6
BP	GO:0006312	mitotic recombination	3/241	26/18800	0.00435037	0.0369781	0.0314829	RAD51/DMC1/BRCA2	3
BP	GO:0051446	positive regulation of meiotic cell cycle	3/241	26/18800	0.00435037	0.0369781	0.0314829	RAD51AP1/CDC25C/CDC25A	3
BP	GO:0060706	cell differentiation involved in embryonic placenta development	3/241	26/18800	0.00435037	0.0369781	0.0314829	E2F8/PLK4/E2F7	3
BP	GO:0072698	protein localization to microtubule cytoskeleton	4/241	53/18800	0.00471662	0.0397706	0.0338604	SPAG5/TTK/STIL/KIF20B	4
BP	GO:1900087	positive regulation of G1/S transition of mitotic cell cycle	4/241	53/18800	0.00471662	0.0397706	0.0338604	CDC6/STIL/TERT/RRM2	4
BP	GO:0051571	positive regulation of histone H3-K4 methylation	3/241	27/18800	0.00484835	0.0407184	0.0346674	BRCA1/DNMT3B/MYB	3
BP	GO:0048599	oocyte development	4/241	54/18800	0.00504359	0.0420727	0.0358204	TRIP13/DMC1/FBXO5/BRCA2	4
BP	GO:0031497	chromatin assembly	8/241	205/18800	0.00504953	0.0420727	0.0358204	MCM2/OIP5/ASF1B/EZH2/HELLS/HJURP/TET1/CHAF1B	8
BP	GO:0007064	mitotic sister chromatid cohesion	3/241	28/18800	0.00537934	0.0444692	0.0378608	SMC1B/CDC20/CDCA5	3
BP	GO:0007141	male meiosis I	3/241	28/18800	0.00537934	0.0444692	0.0378608	TRIP13/DMC1/BRCA2	3
BP	GO:0010332	response to gamma radiation	4/241	56/18800	0.00574238	0.047285	0.0402581	RAD51/BRCA2/FANCD2/XRCC2	4
BP	GO:0044380	protein localization to cytoskeleton	4/241	57/18800	0.00611479	0.0501556	0.0427021	SPAG5/TTK/STIL/KIF20B	4
BP	GO:0031396	regulation of protein ubiquitination	8/241	213/18800	0.00632405	0.0516709	0.0439923	BRCA1/FBXO5/CDC20/FANCI/BUB1B/MAD2L1/PLK1/UBE2C	8
BP	GO:0009994	oocyte differentiation	4/241	58/18800	0.00650292	0.0529273	0.0450619	TRIP13/DMC1/FBXO5/BRCA2	4
BP	GO:0033314	mitotic DNA replication checkpoint signaling	2/241	10/18800	0.00688147	0.0547401	0.0466054	CLSPN/CDC6	2
BP	GO:0045144	meiotic sister chromatid segregation	2/241	10/18800	0.00688147	0.0547401	0.0466054	BUB1B/BUB1	2
BP	GO:0051177	meiotic sister chromatid cohesion	2/241	10/18800	0.00688147	0.0547401	0.0466054	BUB1B/BUB1	2
BP	GO:0140719	constitutive heterochromatin assembly	2/241	10/18800	0.00688147	0.0547401	0.0466054	EZH2/HELLS	2
BP	GO:1903027	regulation of opsonization	2/241	10/18800	0.00688147	0.0547401	0.0466054	C4BPA/COLEC10	2
BP	GO:1903867	extraembryonic membrane development	2/241	10/18800	0.00688147	0.0547401	0.0466054	E2F8/E2F7	2
BP	GO:0051443	positive regulation of ubiquitin-protein transferase activity	3/241	32/18800	0.00784446	0.0621659	0.0529276	CDC20/PLK1/UBE2C	3
BP	GO:0043279	response to alkaloid	5/241	97/18800	0.00823499	0.0641631	0.054628	RAD51/CCNA2/CRHBP/CHEK1/BLM	5
BP	GO:0007135	meiosis II	2/241	11/18800	0.00833999	0.0641631	0.054628	BUB1B/BUB1	2
BP	GO:0051574	positive regulation of histone H3-K9 methylation	2/241	11/18800	0.00833999	0.0641631	0.054628	BRCA1/MYB	2
BP	GO:0051657	maintenance of organelle location	2/241	11/18800	0.00833999	0.0641631	0.054628	ASPM/GPSM2	2
BP	GO:0061983	meiosis II cell cycle process	2/241	11/18800	0.00833999	0.0641631	0.054628	BUB1B/BUB1	2
BP	GO:0072697	protein localization to cell cortex	2/241	11/18800	0.00833999	0.0641631	0.054628	GPSM2/PLK1	2
BP	GO:1901978	positive regulation of cell cycle checkpoint	2/241	11/18800	0.00833999	0.0641631	0.054628	NDC80/MAD2L1	2
BP	GO:2000615	regulation of histone H3-K9 acetylation	2/241	11/18800	0.00833999	0.0641631	0.054628	BRCA1/CHEK1	2
BP	GO:0006336	DNA replication-independent chromatin assembly	3/241	33/18800	0.00854844	0.0655276	0.0557898	OIP5/ASF1B/HJURP	3
BP	GO:2000242	negative regulation of reproductive process	4/241	63/18800	0.0086888	0.0663623	0.0565004	TRIP13/FBXO5/TTK/FBXO43	4
BP	GO:0006301	postreplication repair	3/241	34/18800	0.00928832	0.0704309	0.0599644	BRCA1/POLN/DTL	3
BP	GO:0034724	DNA replication-independent chromatin organization	3/241	34/18800	0.00928832	0.0704309	0.0599644	OIP5/ASF1B/HJURP	3
BP	GO:0031100	animal organ regeneration	4/241	65/18800	0.00968238	0.0731441	0.0622744	EZH2/CCNA2/CDK1/TYMS	4
BP	GO:0048477	oogenesis	5/241	101/18800	0.00971554	0.0731441	0.0622744	ASPM/TRIP13/DMC1/FBXO5/BRCA2	5
BP	GO:0010826	negative regulation of centrosome duplication	2/241	12/18800	0.00992395	0.0731457	0.0622758	BRCA1/CCNF	2
BP	GO:0046606	negative regulation of centrosome cycle	2/241	12/18800	0.00992395	0.0731457	0.0622758	BRCA1/CCNF	2
BP	GO:0051573	negative regulation of histone H3-K9 methylation	2/241	12/18800	0.00992395	0.0731457	0.0622758	BRCA1/DNMT3B	2
BP	GO:0070601	centromeric sister chromatid cohesion	2/241	12/18800	0.00992395	0.0731457	0.0622758	BUB1B/BUB1	2
BP	GO:0072711	cellular response to hydroxyurea	2/241	12/18800	0.00992395	0.0731457	0.0622758	RAD51/BLM	2
BP	GO:1904667	negative regulation of ubiquitin protein ligase activity	2/241	12/18800	0.00992395	0.0731457	0.0622758	FBXO5/MAD2L1	2
BP	GO:0030010	establishment of cell polarity	6/241	143/18800	0.0103894	0.0760447	0.0647439	NDC80/CENPA/GPSM2/KIF20B/MAD2L1/PLK1	6
BP	GO:0061351	neural precursor cell proliferation	6/241	143/18800	0.0103894	0.0760447	0.0647439	ASPM/WDR62/KIF14/RACGAP1/MELK/SHCBP1	6
BP	GO:0009411	response to UV	6/241	146/18800	0.0114297	0.0833698	0.0709805	BRCA2/DTL/CHEK1/CDC25A/PBK/AURKB	6
BP	GO:0016570	histone modification	13/241	494/18800	0.0115845	0.0833873	0.0709954	BRCA1/DNMT3B/EZH2/MYB/TET1/BRCA2/CCNA2/NCAPG2/INCENP/CHEK1/CDK1/AURKB/UHRF1	13
BP	GO:0043970	histone H3-K9 acetylation	2/241	13/18800	0.0116299	0.0833873	0.0709954	BRCA1/CHEK1	2
BP	GO:0072710	response to hydroxyurea	2/241	13/18800	0.0116299	0.0833873	0.0709954	RAD51/BLM	2
BP	GO:1900262	regulation of DNA-directed DNA polymerase activity	2/241	13/18800	0.0116299	0.0833873	0.0709954	GINS1/GINS4	2
BP	GO:1900264	positive regulation of DNA-directed DNA polymerase activity	2/241	13/18800	0.0116299	0.0833873	0.0709954	GINS1/GINS4	2
BP	GO:0007004	telomere maintenance via telomerase	4/241	69/18800	0.0118844	0.0849231	0.072303	NEK2/PIF1/TERT/AURKB	4
BP	GO:0051567	histone H3-K9 methylation	3/241	39/18800	0.0135379	0.0960872	0.081808	BRCA1/DNMT3B/MYB	3
BP	GO:0051569	regulation of histone H3-K4 methylation	3/241	39/18800	0.0135379	0.0960872	0.081808	BRCA1/DNMT3B/MYB	3
BP	GO:0030330	DNA damage response, signal transduction by p53 class mediator	4/241	72/18800	0.0137307	0.0971285	0.0826946	GTSE1/FOXM1/BRCA2/E2F7	4
CC	GO:0098687	chromosomal region	50/251	366/19594	7.87477e-37	2.05532e-34	1.64127e-34	NCAPD2/RAD51/MCM2/SPAG5/SMC1B/NDC80/BIRC5/CENPM/DMC1/CENPI/OIP5/EZH2/NCAPG/RAD51AP1/TTK/SMC4/CENPA/NEK2/CENPF/HELLS/CENPL/KIF18A/ZWINT/CENPK/HJURP/TOP2A/CCNB1/CDCA8/CENPE/BRCA2/PIF1/KIF2C/NUF2/CDCA5/INCENP/CHEK1/SPC25/SKA1/BUB1B/MAD2L1/TERT/SKA3/PLK1/BUB1/CDK1/ESCO2/AURKB/KNTC1/ERCC6L/BLM	50
CC	GO:0000775	chromosome, centromeric region	40/251	227/19594	5.91417e-34	7.718e-32	6.16319e-32	NCAPD2/SPAG5/SMC1B/NDC80/BIRC5/CENPM/CENPI/OIP5/EZH2/NCAPG/TTK/SMC4/CENPA/NEK2/CENPF/HELLS/CENPL/KIF18A/ZWINT/CENPK/HJURP/TOP2A/CCNB1/CDCA8/CENPE/KIF2C/NUF2/CDCA5/INCENP/SPC25/SKA1/BUB1B/MAD2L1/SKA3/PLK1/BUB1/ESCO2/AURKB/KNTC1/ERCC6L	40
CC	GO:0000793	condensed chromosome	41/251	255/19594	4.05876e-33	3.53112e-31	2.81977e-31	NCAPD2/BRCA1/RAD51/SPAG5/SMC1B/NDC80/BIRC5/CENPM/DMC1/CENPI/NCAPG/TTK/CENPA/NEK2/CENPF/KIF18A/ZWINT/CENPK/HJURP/PSMC3IP/TOP2A/CCNB1/CENPE/BRCA2/KIF2C/NUF2/FANCD2/MKI67/INCENP/CHEK1/SPC25/SKA1/BUB1B/MAD2L1/SKA3/PLK1/BUB1/AURKB/KNTC1/ERCC6L/BLM	41
CC	GO:0005819	spindle	45/251	402/19594	2.62386e-29	1.71207e-27	1.36717e-27	ASPM/HMMR/WDR62/SPAG5/TPX2/BIRC5/KIF4A/CDC6/CDC7/FBXO5/TTK/KIF20A/ECT2/CDC20/NEK2/CENPF/KIF14/KIF18A/GPSM2/DLGAP5/CCNB1/CDCA8/ESPL1/KIF23/KIF11/KIF20B/CENPE/PLK4/KIF2C/INCENP/SKA1/BUB1B/RACGAP1/KIF15/MAD2L1/SKA3/PLK1/CKAP2L/CDK1/SHCBP1/AURKB/KNTC1/KIF18B/PRC1/KIFC1	45
CC	GO:0000779	condensed chromosome, centromeric region	30/251	156/19594	8.39081e-27	4.38e-25	3.49764e-25	NCAPD2/SPAG5/NDC80/BIRC5/CENPM/CENPI/NCAPG/TTK/CENPA/NEK2/CENPF/KIF18A/ZWINT/CENPK/HJURP/CCNB1/CENPE/KIF2C/NUF2/INCENP/SPC25/SKA1/BUB1B/MAD2L1/SKA3/PLK1/BUB1/AURKB/KNTC1/ERCC6L	30
CC	GO:0000776	kinetochore	28/251	146/19594	4.86912e-25	2.11807e-23	1.69138e-23	SPAG5/NDC80/BIRC5/CENPM/CENPI/TTK/CENPA/NEK2/CENPF/KIF18A/ZWINT/CENPK/HJURP/CCNB1/CENPE/KIF2C/NUF2/INCENP/SPC25/SKA1/BUB1B/MAD2L1/SKA3/PLK1/BUB1/AURKB/KNTC1/ERCC6L	28
CC	GO:0072686	mitotic spindle	25/251	160/19594	3.59287e-20	1.33963e-18	1.06976e-18	ASPM/WDR62/SPAG5/TPX2/CDC6/CDC7/ECT2/KIF18A/GPSM2/ESPL1/KIF23/KIF11/KIF20B/CENPE/SKA1/RACGAP1/MAD2L1/SKA3/PLK1/CKAP2L/CDK1/AURKB/KIF18B/PRC1/KIFC1	25
CC	GO:0005874	microtubule	32/251	435/19594	1.36322e-15	4.44749e-14	3.55154e-14	ASPM/GTSE1/SPAG5/TPX2/BIRC5/KIF4A/KIF20A/NEK2/KIF14/KIF18A/KIF23/KIF11/KIF20B/CENPE/GAS2L3/KIF2C/CRHBP/INCENP/SKA1/RACGAP1/KIF15/SKA3/PLK1/CDK1/AURKB/KNTC1/KIF18B/KIF24/TUBA3C/PRC1/KIF4B/KIFC1	32
CC	GO:0030496	midbody	23/251	203/19594	1.75946e-15	5.10245e-14	4.07455e-14	ANLN/ASPM/SPAG5/BIRC5/KIF4A/KIF20A/ECT2/NEK2/CENPF/KIF14/CIT/CDCA8/KIF23/CEP55/KIF20B/CENPE/INCENP/RACGAP1/PLK1/CDK1/SHCBP1/AURKB/PRC1	23
CC	GO:0051233	spindle midzone	12/251	36/19594	1.43059e-14	3.73384e-13	2.98165e-13	CDC6/KIF14/KIF18A/CDCA8/KIF20B/CENPE/INCENP/RACGAP1/PLK1/AURKB/KIF18B/PRC1	12
CC	GO:0000922	spindle pole	20/251	169/19594	5.60316e-14	1.32948e-12	1.06165e-12	ASPM/WDR62/SPAG5/TPX2/CDC6/CDC20/NEK2/CENPF/GPSM2/DLGAP5/CCNB1/KIF11/KIF20B/PLK4/MAD2L1/PLK1/CKAP2L/AURKB/KNTC1/PRC1	20
CC	GO:0000228	nuclear chromosome	20/251	228/19594	1.56399e-11	3.40167e-10	2.7164e-10	NCAPD2/BRCA1/RAD51/MCM10/MCM2/SMC1B/BIRC5/CDC45/DMC1/GINS1/NEK2/PSMC3IP/TOP2A/BRCA2/GINS4/INCENP/CHEK1/PLK1/BLM/WDHD1	20
CC	GO:0000940	outer kinetochore	7/251	12/19594	3.9048e-11	7.83964e-10	6.26033e-10	NDC80/CENPF/CCNB1/SKA1/BUB1B/SKA3/PLK1	7
CC	GO:0005876	spindle microtubule	13/251	83/19594	4.37661e-11	8.15926e-10	6.51556e-10	BIRC5/KIF4A/KIF18A/KIF11/CENPE/SKA1/SKA3/PLK1/CDK1/AURKB/KNTC1/KIF18B/PRC1	13
CC	GO:0005871	kinesin complex	10/251	49/19594	5.27262e-10	9.17437e-09	7.32617e-09	KIF20A/KIF14/KIF18A/KIF23/KIF11/KIF20B/KIF2C/KIF15/KIF18B/KIFC1	10
CC	GO:0000794	condensed nuclear chromosome	11/251	74/19594	2.51269e-09	4.09882e-08	3.27311e-08	BRCA1/RAD51/SMC1B/DMC1/NEK2/PSMC3IP/BRCA2/INCENP/CHEK1/PLK1/BLM	11
CC	GO:0000800	lateral element	6/251	13/19594	6.6261e-09	1.0173e-07	8.12364e-08	BRCA1/RAD51/SMC1B/BRCA2/INCENP/BLM	6
CC	GO:1990023	mitotic spindle midzone	6/251	14/19594	1.14715e-08	1.66337e-07	1.32828e-07	KIF18A/KIF20B/CENPE/AURKB/KIF18B/PRC1	6
CC	GO:0005875	microtubule associated complex	14/251	160/19594	1.95139e-08	2.6806e-07	2.14059e-07	BIRC5/KIF20A/KIF14/KIF18A/CDCA8/KIF23/KIF11/KIF20B/KIF2C/INCENP/KIF15/AURKB/KIF18B/KIFC1	14
CC	GO:0000792	heterochromatin	9/251	69/19594	2.33524e-07	3.04749e-06	2.43357e-06	WDR76/SALL4/EZH2/CENPA/HELLS/INCENP/EME1/ESCO2/UHRF1	9
CC	GO:0000795	synaptonemal complex	7/251	41/19594	8.07281e-07	9.57729e-06	7.64793e-06	BRCA1/RAD51/SMC1B/BRCA2/INCENP/PLK1/BLM	7
CC	GO:0099086	synaptonemal structure	7/251	41/19594	8.07281e-07	9.57729e-06	7.64793e-06	BRCA1/RAD51/SMC1B/BRCA2/INCENP/PLK1/BLM	7
CC	GO:0010369	chromocenter	5/251	15/19594	8.96372e-07	1.01719e-05	8.12273e-06	OIP5/CDCA8/INCENP/ESCO2/AURKB	5
CC	GO:0000152	nuclear ubiquitin ligase complex	7/251	45/19594	1.55993e-06	1.69642e-05	1.35468e-05	BRCA1/RAD51/CDC20/BARD1/BRCA2/BUB1B/UBE2C	7
CC	GO:0000307	cyclin-dependent protein kinase holoenzyme complex	7/251	49/19594	2.82686e-06	2.95124e-05	2.35671e-05	CCNE1/CCNB1/CCNA2/CCNB2/CCNF/CDK1/CCNE2	7
CC	GO:0045171	intercellular bridge	8/251	75/19594	5.21937e-06	5.23944e-05	4.18395e-05	TPX2/CDC6/CDC7/KIF20A/CDCA8/CEP55/KIF20B/PRC1	8
CC	GO:0097431	mitotic spindle pole	6/251	36/19594	5.87462e-06	5.6788e-05	4.53479e-05	ASPM/SPAG5/GPSM2/KIF20B/PLK1/AURKB	6
CC	GO:0071162	CMG complex	4/251	11/19594	8.08416e-06	7.53559e-05	6.01753e-05	MCM2/CDC45/GINS1/GINS4	4
CC	GO:0005721	pericentric heterochromatin	5/251	23/19594	9.23602e-06	8.31242e-05	6.63786e-05	EZH2/CENPA/HELLS/INCENP/ESCO2	5
CC	GO:0000781	chromosome, telomeric region	11/251	166/19594	1.00597e-05	8.75193e-05	6.98884e-05	RAD51/MCM2/DMC1/EZH2/RAD51AP1/BRCA2/PIF1/CHEK1/TERT/CDK1/BLM	11
CC	GO:0005657	replication fork	7/251	60/19594	1.12749e-05	9.49274e-05	7.58041e-05	MCM10/PIF1/CHEK1/XRCC2/BLM/WDHD1/UHRF1	7
CC	GO:0031261	DNA replication preinitiation complex	4/251	12/19594	1.20043e-05	9.79097e-05	7.81856e-05	MCM2/CDC45/GINS1/GINS4	4
CC	GO:0032153	cell division site	7/251	73/19594	4.12996e-05	0.000326642	0.000260839	ANLN/KIF20A/ECT2/CIT/CEP55/PLK4/RACGAP1	7
CC	GO:0044815	DNA packaging complex	11/251	198/19594	5.16555e-05	0.000396532	0.00031665	NCAPD2/SMC1B/NDC80/NCAPG/SMC4/CENPA/NCAPH/NUF2/NCAPG2/SPC25/TERT	11
CC	GO:0032154	cleavage furrow	6/251	55/19594	7.13519e-05	0.000532081	0.000424892	KIF20A/ECT2/CIT/CEP55/PLK4/RACGAP1	6
CC	GO:0070938	contractile ring	3/251	10/19594	0.000233208	0.00169076	0.00135015	ANLN/KIF20B/PRC1	3
CC	GO:1902554	serine/threonine protein kinase complex	7/251	99/19594	0.000284708	0.00200834	0.00160376	CCNE1/CCNB1/CCNA2/CCNB2/CCNF/CDK1/CCNE2	7
CC	GO:0016363	nuclear matrix	7/251	109/19594	0.000511503	0.00351322	0.00280547	KIF4A/LMNB1/CENPF/MYB/BLM/KIF4B/UHRF1	7
CC	GO:0045120	pronucleus	3/251	13/19594	0.000540206	0.00361523	0.00288693	EZH2/CENPF/CCNA2	3
CC	GO:0005814	centriole	8/251	147/19594	0.000625859	0.00408373	0.00326106	WDR62/STIL/TOP2A/CEP55/PLK4/CCNF/PLK1/KIF24	8
CC	GO:0072687	meiotic spindle	3/251	14/19594	0.000681047	0.00433545	0.00346206	ASPM/FBXO5/INCENP	3
CC	GO:1902911	protein kinase complex	7/251	115/19594	0.000704987	0.00438099	0.00349843	CCNE1/CCNB1/CCNA2/CCNB2/CCNF/CDK1/CCNE2	7
CC	GO:1990752	microtubule end	4/251	33/19594	0.000803268	0.00487565	0.00389344	ASPM/SPAG5/KIF2C/KIF18B	4
CC	GO:0090543	Flemming body	4/251	35/19594	0.00100745	0.005976	0.00477212	KIF14/KIF23/CEP55/RACGAP1	4
CC	GO:0034399	nuclear periphery	7/251	127/19594	0.00126348	0.00732821	0.00585193	KIF4A/LMNB1/CENPF/MYB/BLM/KIF4B/UHRF1	7
CC	GO:0005828	kinetochore microtubule	3/251	18/19594	0.00147001	0.00834071	0.00666046	KIF18A/CENPE/KNTC1	3
CC	GO:0005680	anaphase-promoting complex	3/251	21/19594	0.00232903	0.0129335	0.0103281	CDC20/BUB1B/UBE2C	3
CC	GO:1990391	DNA repair complex	4/251	44/19594	0.00238725	0.0129807	0.0103657	BRCA1/BRCA2/FANCI/FANCD2	4
CC	GO:0035371	microtubule plus-end	3/251	23/19594	0.00304334	0.0162104	0.0129448	SPAG5/KIF2C/KIF18B	3
CC	GO:0000151	ubiquitin ligase complex	10/251	302/19594	0.00575091	0.0300197	0.0239722	BRCA1/RAD51/CDC20/BARD1/BRCA2/DTL/BUB1B/CCNF/UBE2C/DCAF8L1	10
CC	GO:0016342	catenin complex	3/251	31/19594	0.00716471	0.0366665	0.0292799	CDH18/CDH22/CDH12	3
CC	GO:0000235	astral microtubule	2/251	11/19594	0.00832975	0.0410201	0.0327565	KIF18A/KIF18B	2
CC	GO:0005818	aster	2/251	11/19594	0.00832975	0.0410201	0.0327565	KIF18A/KIF18B	2
CC	GO:0034451	centriolar satellite	5/251	107/19594	0.0122408	0.0591637	0.047245	WDR62/SPAG5/DLGAP5/CEP55/PLK1	5
CC	GO:0001741	XY body	2/251	14/19594	0.0134382	0.0626315	0.0500143	PLK4/ESCO2	2
CC	GO:0031616	spindle pole centrosome	2/251	14/19594	0.0134382	0.0626315	0.0500143	DLGAP5/AURKB	2
CC	GO:0032590	dendrite membrane	3/251	41/19594	0.0154753	0.0707482	0.0564958	GABRA3/MPP2/DDN	3
CC	GO:0005881	cytoplasmic microtubule	4/251	75/19594	0.0157218	0.0707482	0.0564958	GTSE1/KIF18A/KIF2C/KIF18B	4
CC	GO:0061695	transferase complex, transferring phosphorus-containing groups	8/251	259/19594	0.0188337	0.0833151	0.0665311	CCNE1/CCNB1/CCNA2/CCNB2/CCNF/TERT/CDK1/CCNE2	8
MF	GO:0008017	microtubule binding	25/239	272/18410	1.74943e-14	6.28045e-12	5.74549e-12	GTSE1/SPAG5/TPX2/BIRC5/KIF4A/KIF20A/CENPF/KIF14/KIF18A/DLGAP5/KIF23/KIF11/KIF20B/CENPE/GAS2L3/KIF2C/SKA1/RACGAP1/KIF15/PLK1/KIF18B/KIF24/PRC1/KIF4B/KIFC1	25
MF	GO:0015631	tubulin binding	28/239	376/18410	8.82293e-14	1.58372e-11	1.44882e-11	BRCA1/GTSE1/SPAG5/TPX2/BIRC5/KIF4A/PACRG/KIF20A/CENPF/KIF14/KIF18A/DLGAP5/KIF23/KIF11/KIF20B/CENPE/GAS2L3/BRCA2/KIF2C/SKA1/RACGAP1/KIF15/PLK1/KIF18B/KIF24/PRC1/KIF4B/KIFC1	28
MF	GO:0003777	microtubule motor activity	14/239	67/18410	1.40204e-13	1.67778e-11	1.53487e-11	KIF4A/KIF20A/KIF14/KIF18A/KIF23/KIF11/KIF20B/CENPE/KIF2C/KIF15/KIF18B/KIF24/KIF4B/KIFC1	14
MF	GO:0003774	cytoskeletal motor activity	14/239	111/18410	1.81761e-10	1.63131e-08	1.49235e-08	KIF4A/KIF20A/KIF14/KIF18A/KIF23/KIF11/KIF20B/CENPE/KIF2C/KIF15/KIF18B/KIF24/KIF4B/KIFC1	14
MF	GO:0140097	catalytic activity, acting on DNA	17/239	222/18410	5.23659e-09	3.75987e-07	3.43961e-07	RAD51/POLQ/MCM2/RAD54L/DNMT3B/DMC1/NEIL3/POLN/TOP2A/PIF1/DNASE1L3/TERT/EXO1/ATAD5/ERCC6L/XRCC2/BLM	17
MF	GO:0008574	plus-end-directed microtubule motor activity	6/239	17/18410	4.93689e-08	2.95391e-06	2.7023e-06	KIF14/KIF18A/KIF11/KIF20B/CENPE/KIF18B	6
MF	GO:0008094	ATP-dependent activity, acting on DNA	11/239	103/18410	9.78921e-08	5.02047e-06	4.59283e-06	RAD51/POLQ/MCM2/RAD54L/DMC1/TOP2A/PIF1/ATAD5/ERCC6L/XRCC2/BLM	11
MF	GO:0016887	ATP hydrolysis activity	18/239	325/18410	2.67926e-07	1.20232e-05	1.09991e-05	TRIP13/MCM2/SMC1B/RAD54L/KIF20A/SMC4/KIF14/KIF18A/KIF23/KIF20B/PIF1/KIF2C/KIF15/ATAD5/KIF18B/ERCC6L/BLM/KIFC1	18
MF	GO:0003697	single-stranded DNA binding	11/239	120/18410	4.69452e-07	1.87259e-05	1.71309e-05	RAD51/MCM10/MCM2/RAD54L/CDC45/DMC1/NEIL3/RAD51AP1/SMC4/BRCA2/BLM	11
MF	GO:0003678	DNA helicase activity	7/239	72/18410	4.09156e-05	0.001334	0.00122037	RAD51/POLQ/MCM2/RAD54L/PIF1/ERCC6L/BLM	7
MF	GO:0016538	cyclin-dependent protein serine/threonine kinase regulator activity	6/239	50/18410	4.43042e-05	0.001334	0.00122037	CCNE1/CCNB1/CCNA2/CCNB2/CCNF/CCNE2	6
MF	GO:0003688	DNA replication origin binding	4/239	16/18410	4.45906e-05	0.001334	0.00122037	MCM10/MCM2/CDC45/CDC6	4
MF	GO:0000217	DNA secondary structure binding	5/239	36/18410	9.59791e-05	0.0026505	0.00242473	CLSPN/NEIL3/RAD51AP1/XRCC2/BLM	5
MF	GO:0017116	single-stranded DNA helicase activity	4/239	23/18410	0.000201992	0.00517965	0.00473846	RAD51/POLQ/MCM2/PIF1	4
MF	GO:0106310	protein serine kinase activity	14/239	360/18410	0.00027231	0.00651729	0.00596216	CDC7/TTK/NEK2/CIT/PKMYT1/PLK4/CHEK1/BUB1B/MELK/PLK1/PBK/BUB1/CDK1/AURKB	14
MF	GO:0019887	protein kinase regulator activity	10/239	207/18410	0.000387018	0.00868371	0.00794405	TPX2/CCNE1/CIT/CCNB1/CCNA2/NCAPG2/INCENP/CCNB2/CCNF/CCNE2	10
MF	GO:0008022	protein C-terminus binding	9/239	179/18410	0.000565274	0.0119372	0.0109205	RAD51/CDC20/CENPF/GPSM2/TOP2A/BRCA2/MKI67/MAD2L1/TERT	9
MF	GO:0004386	helicase activity	8/239	155/18410	0.000960849	0.0191636	0.0175313	RAD51/POLQ/MCM2/RAD54L/HELLS/PIF1/ERCC6L/BLM	8
MF	GO:0019207	kinase regulator activity	10/239	235/18410	0.00103247	0.0191661	0.0175335	TPX2/CCNE1/CIT/CCNB1/CCNA2/NCAPG2/INCENP/CCNB2/CCNF/CCNE2	10
MF	GO:0035173	histone kinase activity	3/239	16/18410	0.00106775	0.0191661	0.0175335	CHEK1/CDK1/AURKB	3
MF	GO:0004674	protein serine/threonine kinase activity	14/239	430/18410	0.00153886	0.0263072	0.0240664	CDC7/TTK/NEK2/CIT/PKMYT1/PLK4/CHEK1/BUB1B/MELK/PLK1/PBK/BUB1/CDK1/AURKB	14
MF	GO:0004712	protein serine/threonine/tyrosine kinase activity	14/239	446/18410	0.00215604	0.0351826	0.0321858	CDC7/TTK/NEK2/CIT/PKMYT1/PLK4/CHEK1/BUB1B/MELK/PLK1/PBK/BUB1/CDK1/AURKB	14
MF	GO:0070182	DNA polymerase binding	3/239	22/18410	0.00277246	0.0432744	0.0395884	RAD51/FANCI/FANCD2	3
KEGG	hsa04110	Cell cycle	25/96	126/8164	1.32995e-24	1.56935e-22	1.39995e-22	E2F2/MCM2/SMC1B/RBL1/CDC45/CDC6/CDC7/E2F1/CCNE1/TTK/CDC20/PKMYT1/CCNB1/ESPL1/CCNA2/CHEK1/BUB1B/CCNB2/CDC25C/CDC25A/MAD2L1/PLK1/BUB1/CDK1/CCNE2	25
KEGG	hsa04114	Oocyte meiosis	15/96	131/8164	2.32975e-11	1.37455e-09	1.22619e-09	SMC1B/CCNE1/FBXO5/CDC20/PKMYT1/CCNB1/ESPL1/FBXO43/CCNB2/CDC25C/MAD2L1/PLK1/BUB1/CDK1/CCNE2	15
KEGG	hsa03460	Fanconi anemia pathway	9/96	54/8164	1.01038e-08	3.97417e-07	3.5452e-07	BRCA1/RAD51/POLN/BRCA2/FANCI/FANCD2/EME1/FANCB/BLM	9
KEGG	hsa03440	Homologous recombination	8/96	41/8164	1.89004e-08	5.57561e-07	4.97378e-07	BRCA1/RAD51/RAD54L/BARD1/BRCA2/EME1/XRCC2/BLM	8
KEGG	hsa04218	Cellular senescence	13/96	156/8164	2.81957e-08	6.65418e-07	5.93593e-07	E2F2/RBL1/MYBL2/E2F1/CCNE1/FOXM1/CCNB1/CCNA2/CHEK1/CCNB2/CDC25A/CDK1/CCNE2	13
KEGG	hsa04914	Progesterone-mediated oocyte maturation	10/96	102/8164	2.74413e-07	5.39679e-06	4.81426e-06	PKMYT1/CCNB1/CCNA2/CCNB2/CDC25C/CDC25A/MAD2L1/PLK1/BUB1/CDK1	10
KEGG	hsa04115	p53 signaling pathway	8/96	73/8164	1.95387e-06	3.29366e-05	2.93815e-05	GTSE1/CCNE1/CCNB1/CHEK1/CCNB2/CDK1/RRM2/CCNE2	8
KEGG	hsa05166	Human T-cell leukemia virus 1 infection	12/96	222/8164	1.01137e-05	0.000149177	0.000133074	E2F2/E2F1/CCNE1/CDC20/ESPL1/CCNA2/CHEK1/BUB1B/CCNB2/MAD2L1/TERT/CCNE2	12
KEGG	hsa05206	MicroRNAs in cancer	11/96	310/8164	0.000980009	0.012849	0.0114621	E2F2/BRCA1/DNMT3B/E2F1/CCNE1/EZH2/KIF23/CDCA5/CDC25C/CDC25A/CCNE2	11
KEGG	hsa04610	Complement and coagulation cascades	5/96	85/8164	0.00316368	0.0373314	0.0333019	C6/C7/C4BPA/CFHR4/CFI	5
