# Supplementary material for: NamiRNA-mediated high expression of KNSTRN correlates with poor prognosis and tumor immune infiltration of hepatocellular carcinoma
Source: Research Square preprint supplement (doi:10.21203/rs.3.rs-3032233/v1), 2023-06-26
Supplement: Supplementary file 6 [file 71e0a9b8afb7dd546aa2df60.xlsx]

## Sheet: Sheet 1
LIHC_rnaseq_clinical_raw
RNAseq样本编号	status	是否含有RNAseq数据	是否有对应临床数据	是否是同一个临床数据重复检测	sample	admin.batch_number	admin.bcr	admin.day_of_dcc_upload	admin.disease_code	admin.file_uuid	admin.month_of_dcc_upload	admin.project_code	admin.year_of_dcc_upload	ablations.ablation.ablation_treatments.ablation_performed_indicator	ablations.ablation.ablation_treatments.ablation_treatment.ablation_type	ablations.ablation.ablation_treatments.ablation_treatment.ablation_type_other	ablations.ablation.ablation_treatments.ablation_treatment.days_to_ablation_performed	ablations.ablation.ablation_treatments.ablation_treatment.lesions_count	ablations.ablation.ablation_treatments.ablation_treatment.treatment_cycles_count	ablations.ablation.bcr_ablation_barcode	ablations.ablation.bcr_ablation_uuid	ablations.ablation.day_of_form_completion	ablations.ablation.embolization_treatments.embolization_performed_indicator	ablations.ablation.embolization_treatments.embolization_treatment.days_to_embolization_performed	ablations.ablation.embolization_treatments.embolization_treatment.embolization_therapy_drug_name	ablations.ablation.embolization_treatments.embolization_treatment.embolization_therapy_drug_name_other	ablations.ablation.embolization_treatments.embolization_treatment.embolization_type	ablations.ablation.embolization_treatments.embolization_treatment.embolizing_agent_utilized	ablations.ablation.embolization_treatments.embolization_treatment.embolizing_agent_utilized_other	ablations.ablation.month_of_form_completion	ablations.ablation.year_of_form_completion	adjacent_hepatic_tissue_inflammation_extent_type	albumin_result_lower_limit	albumin_result_specified_value	albumin_result_upper_limit	bcr_patient_barcode	bcr_patient_uuid	bilirubin_lower_limit	bilirubin_upper_limit	cancer_first_degree_relative	child_pugh_classification_grade	creatinine_lower_level	creatinine_upper_limit	creatinine_value_in_mg_dl	day_of_form_completion	days_to_birth	days_to_death	days_to_initial_pathologic_diagnosis	days_to_last_followup
TCGA-2V-A95S-01A-11R-A37K-07	Tumor	Yes	Yes	No	TCGA-2V-A95S	384.50.0	Nationwide Children's Hospital	22	LIHC	0FEC632A-1FEA-4E48-BB3D-A89D7ADC56D1	12	TCGA	2016																			Severe	3.5	4.2	5.2	TCGA-2V-A95S	2C041473-EAAA-4B7C-9B2E-B9DA3543AD18	0	1.5	Not Available	A	.7	1.2	.6	15	Not Available		Not Available
TCGA-2Y-A9GS-01A-12R-A38B-07	Tumor	Yes	Yes	No	TCGA-2Y-A9GS	399.48.0	Nationwide Children's Hospital	22	LIHC	0BA1261C-A065-4BCB-A10D-8850DB4D2858	12	TCGA	2016																			None	3.5	4	5	TCGA-2Y-A9GS	95B97198-1A1B-4F01-90F3-6C66638371D1	0.2	0.7	Not Available	Unknown	0.8	1.5	1.6	3	-21318	724	0
TCGA-2Y-A9GT-01A-11R-A38B-07	Tumor	Yes	Yes	No	TCGA-2Y-A9GT	399.48.0	Nationwide Children's Hospital	22	LIHC	A5139FE0-BF49-49C2-8A98-35EB7B99EFA5	12	TCGA	2016	NO						TCGA-2Y-A9GT-A66917	2D8CCE67-5CA1-4B90-AAFD-04B8C2CF2B5D	27	YES	Not Available;1547	Doxorubicin;Not Available	Not Applicable;Not Applicable	Chemoembolization;Radioembolization	Other, specify;Y-90 Therasphere	LC beads;Not Applicable	10	2014	None	3.5	3.7	5	TCGA-2Y-A9GT	31A2ECC5-2D45-4823-8187-DC701DD412A8	0.2	0.4	1	C	0.8	1.5	0.8	3	-18768	1624	0
TCGA-2Y-A9GU-01A-11R-A38B-07	Tumor	Yes	Yes	No	TCGA-2Y-A9GU	399.48.0	Nationwide Children's Hospital	22	LIHC	B0C26553-D83F-4938-8529-2031AA52EB37	12	TCGA	2016																			None	3.5	4.4	5	TCGA-2Y-A9GU	B27720A2-E240-413C-A0F1-0B1AF3621DE2	0.2	0.3	2	Unknown	0.8	1.5	0.9	3	-20187		0	1569
TCGA-2Y-A9GV-01A-11R-A38B-07	Tumor	Yes	Yes	No	TCGA-2Y-A9GV	399.48.0	Nationwide Children's Hospital	22	LIHC	0AD06E86-5A0F-40B9-A5E0-387A52A71157	12	TCGA	2016																			Unknown	3.5	4.2	5	TCGA-2Y-A9GV	D1AA9C1A-D732-48C0-B669-8A14E0397344	0.2	0.3	Not Available	Unknown	0.8	1.5	0.6	3	-20011	2532	0
TCGA-2Y-A9GW-01A-11R-A38B-07	Tumor	Yes	Yes	No	TCGA-2Y-A9GW	399.48.0	Nationwide Children's Hospital	22	LIHC	8FC73A6F-3467-4B9D-A77A-5A367242CE87	12	TCGA	2016																			None	3.5	4.5	5	TCGA-2Y-A9GW	3E1920B3-3BD4-4506-A0CF-567257154BCF	0.2	0.6	1	Unknown	0.8	1.5	1	3	-23587	1271	0
TCGA-2Y-A9GX-01A-11R-A38B-07	Tumor	Yes	Yes	No	TCGA-2Y-A9GX	399.48.0	Nationwide Children's Hospital	22	LIHC	DB6FEE90-92D8-4446-B089-FCEDAF0303B7	12	TCGA	2016																			None	3.5	4.3	5	TCGA-2Y-A9GX	D6C2C6CE-3483-4FE5-AEF6-E40419F728CF	0.2	0.4	Not Available	Unknown	0.8	1.5	0.7	3	-24963		0	2442
TCGA-2Y-A9GY-01A-11R-A38B-07	Tumor	Yes	Yes	No	TCGA-2Y-A9GY	399.48.0	Nationwide Children's Hospital	22	LIHC	8C3B046D-EC7D-460C-A8B3-172C97784283	12	TCGA	2016																			None	3.5	4.2	5	TCGA-2Y-A9GY	75030B63-59AF-4705-86E7-3A431B7CF65A	0.2	0.4	2	Unknown	0.8	1.5	0.6	3	-23435	757	0
TCGA-2Y-A9GZ-01A-11R-A39D-07	Tumor	Yes	Yes	No	TCGA-2Y-A9GZ	405.45.0	Nationwide Children's Hospital	22	LIHC	CF3AD364-20EF-472C-AA4B-DB4012EF49BE	12	TCGA	2016																			None	3.5	4.5	5	TCGA-2Y-A9GZ	0E8C3831-DEF9-4EFA-9F93-8942072D6A77	0.2	0.7	4	A	0.8	1.5	1.1	3	-30082	848	0
TCGA-2Y-A9H0-01A-11R-A38B-07	Tumor	Yes	Yes	No	TCGA-2Y-A9H0	399.48.0	Nationwide Children's Hospital	22	LIHC	7E213570-71AC-4373-9A76-91898BBE6F37	12	TCGA	2016																			None	3.5	2	5	TCGA-2Y-A9H0	492FF93F-432B-4B73-8706-632FB2C83EB4	0.2	0.8	Not Available	Unknown	0.8	1.5	0.8	3	-18109		0	3675
TCGA-2Y-A9H1-01A-11R-A38B-07	Tumor	Yes	Yes	No	TCGA-2Y-A9H1	399.48.0	Nationwide Children's Hospital	22	LIHC	E70917B9-4CAB-49C5-A673-5406B2DC1621	12	TCGA	2016	NO						TCGA-2Y-A9H1-A66956	6FF2F78D-C736-4E2F-A197-E82382551E44	28	YES	178	Not Available	Not Applicable	Radioembolization	Y-90 Therasphere	Not Applicable	10	2014	Unknown	3.5	4.4	5	TCGA-2Y-A9H1	9C5E2438-F587-4935-92F0-4BFD57468EAA	0.2	0.5	Not Available	Unknown	0.8	1.5	0.9	3	-21222	1229	0
TCGA-2Y-A9H2-01A-12R-A38B-07	Tumor	Yes	Yes	No	TCGA-2Y-A9H2	399.48.0	Nationwide Children's Hospital	22	LIHC	460D045E-F7ED-4AEE-A888-3AD07F0F5CF3	12	TCGA	2016																			None	3.5	4.5	5	TCGA-2Y-A9H2	CF7F0473-EAF3-4259-A68E-475A782FC84C	0.2	0.4	Not Available	Unknown	0.8	1.5	1.4	3	-23653		0	1582
TCGA-2Y-A9H3-01A-11R-A38B-07	Tumor	Yes	Yes	No	TCGA-2Y-A9H3	399.48.0	Nationwide Children's Hospital	22	LIHC	80D05BA0-F067-47BD-97F1-02978F91F77B	12	TCGA	2016	NO						TCGA-2Y-A9H3-A66938	27ADBB25-B09A-416B-AA11-22851BE807AA	28	YES	42	Not Available	Not Applicable	Radioembolization	Y-90 Therasphere	Not Applicable	10	2014	None	3.5	5.3	5	TCGA-2Y-A9H3	9B69D7F9-38EB-48E1-BDC0-A092A53BC709	0.2	0.3	3	Unknown	0.8	1.5	0.9	3	-16443		0	1257
TCGA-2Y-A9H4-01A-11R-A38B-07	Tumor	Yes	Yes	No	TCGA-2Y-A9H4	399.48.0	Nationwide Children's Hospital	22	LIHC	0DA00035-7ACE-443D-8ABE-E9CA6D0CD81F	12	TCGA	2016																			Unknown	3.5	4.6	5	TCGA-2Y-A9H4	801B1D2C-EB6F-4EEF-A00B-83DA939D755A	0.2	0.3	2	A	0.8	1.5	1.2	3	-25096		0	1270
TCGA-2Y-A9H5-01A-11R-A38B-07	Tumor	Yes	Yes	No	TCGA-2Y-A9H5	399.48.0	Nationwide Children's Hospital	22	LIHC	22042C53-AC23-4469-AD82-795A2F56E5B1	12	TCGA	2016																			Unknown	3.5	4.9	5	TCGA-2Y-A9H5	51810579-E20D-4F08-93E7-891D645931DB	0.2	0.3	2	Unknown	0.8	1.5	0.6	3	-21818	555	0
TCGA-2Y-A9H6-01A-11R-A39D-07	Tumor	Yes	Yes	No	TCGA-2Y-A9H6	405.45.0	Nationwide Children's Hospital	22	LIHC	FE1E11EE-CD01-4E52-BDBB-4944E2CA42B8	12	TCGA	2016																			None	3.5	4	5	TCGA-2Y-A9H6	BC3502BC-BBF6-44F2-A1F4-D1567819AEFB	0.3	0.3	1	Unknown	0.8	1.5	1.8	3	-24982		0	357
TCGA-2Y-A9H7-01A-11R-A39D-07	Tumor	Yes	Yes	No	TCGA-2Y-A9H7	405.45.0	Nationwide Children's Hospital	22	LIHC	8D427FF7-53F6-4C82-9E17-84AC90ACA33E	12	TCGA	2016	YES	Microwave	Not Applicable	1168	1	2	TCGA-2Y-A9H7-A69177	27B927A0-C518-45CA-9B20-9D2337439A9C	6	NO	Not Available	Not Available	Not Applicable	Not Available	Not Available	Not Applicable	11	2014	None	3.5	3.4	5	TCGA-2Y-A9H7	18602EC8-AED1-4515-B0D1-0DB6D1CBB2C4	0.2	0.3	Not Available	A	0.8	1.5	1.2	3	-29752		0	1133
TCGA-2Y-A9H8-01A-11R-A39D-07	Tumor	Yes	Yes	No	TCGA-2Y-A9H8	405.45.0	Nationwide Children's Hospital	22	LIHC	EDDCAD0F-975A-430E-8A5A-C844340701C9	12	TCGA	2016																			Unknown	3.5	4.2	5	TCGA-2Y-A9H8	3528DD91-1A6D-4D41-A3EE-829C857CC904	0.2	0.3	2	Unknown	0.8	1.5	0.6	3	-31322	633	0
TCGA-2Y-A9H9-01A-21R-A39D-07	Tumor	Yes	Yes	No	TCGA-2Y-A9H9	405.45.0	Nationwide Children's Hospital	22	LIHC	48126058-F6B2-4650-A0DA-6B038D8F468E	12	TCGA	2016	NO						TCGA-2Y-A9H9-A67255	36E9FF5F-3F7D-48FC-B27F-3D2A7718C96B	3	YES	281;400;434	Doxorubicin;Other;Other	Not Applicable;Unknown;lipiodol/doxyrubicin	Chemoembolization;Chemoembolization;Chemoembolization	Other, specify;Other, specify;Other, specify	LC Beads;Unknown;embospheres	11	2014	None	3.5	4.7	5	TCGA-2Y-A9H9	EFC3E5E4-0D8E-4BEF-A259-29F8ED21684F	0.2	0.6	2	A	0.8	1.2	0.8	3	-25670		0	456
TCGA-2Y-A9HA-01A-11R-A39D-07	Tumor	Yes	Yes	No	TCGA-2Y-A9HA	405.45.0	Nationwide Children's Hospital	22	LIHC	7346C15B-2291-470F-B471-07230AB9B82F	12	TCGA	2016	NO						TCGA-2Y-A9HA-A67272	52861D38-28FF-4D51-989C-88D2270EF75C	3	YES	0	Not Available	Not Applicable	Radioembolization	Other, specify	Habib	11	2014	None	3.5	3.5	5	TCGA-2Y-A9HA	A25A714E-C142-482B-91C8-4FEA763E0254	0.2	0.6	Not Available	A	0.8	1.5	0.8	3	-25892	36	0
TCGA-2Y-A9HB-01A-11R-A39D-07	Tumor	Yes	Yes	No	TCGA-2Y-A9HB	405.45.0	Nationwide Children's Hospital	22	LIHC	3EC1497A-8E70-48ED-9F9D-65C21B36A95A	12	TCGA	2016																			None	3.5	3.9	5	TCGA-2Y-A9HB	B181B591-269C-4E48-B681-243D28772025	0.2	0.6	Not Available	Unknown	0.8	1.5	0.8	3	-24359		0	158
TCGA-3K-AAZ8-01A-12R-A39D-07	Tumor	Yes	Yes	No	TCGA-3K-AAZ8	405.45.0	Nationwide Children's Hospital	22	LIHC	FCED3272-24D0-44A3-AB5F-0857DEE833E1	12	TCGA	2016																			Not Available	Not Available	Not Available	Not Available	TCGA-3K-AAZ8	94E387AE-B641-4E9F-BB53-22C7B2A9CCCB	Not Available	Not Available	Not Available	Not Available	Not Available	Not Available	Not Available	25	-24046		0	243
TCGA-4R-AA8I-01A-11R-A38B-07	Tumor	Yes	Yes	No	TCGA-4R-AA8I	399.48.0	Nationwide Children's Hospital	22	LIHC	C1149153-DE66-420A-9381-51A107C1D566	12	TCGA	2016																			None	3.5	3.8	4.8	TCGA-4R-AA8I	91A0C8CD-4F23-4569-8E5C-E5442F7AF530	0.4	1.2	Not Available	A	0.6	1.3	0.7	5	-24279		0	216
TCGA-5C-A9VG-01A-11R-A37K-07	Tumor	Yes	Yes	No	TCGA-5C-A9VG	384.50.0	Nationwide Children's Hospital	22	LIHC	CAAE600B-D0C5-4AFA-9750-984BD5CEDF11	12	TCGA	2016																			None	Not Available	Not Available	Not Available	TCGA-5C-A9VG	073E51F9-FB79-4A5F-9BA0-2C9AF03C0B85	Not Available	Not Available	Not Available	A	Not Available	Not Available	Not Available	26	-21273		0	328
TCGA-5C-A9VH-01A-11R-A37K-07	Tumor	Yes	Yes	No	TCGA-5C-A9VH	384.50.0	Nationwide Children's Hospital	22	LIHC	081DA1DB-9B75-44F9-900E-343A8CA754E8	12	TCGA	2016																			None	Not Available	Not Available	Not Available	TCGA-5C-A9VH	60FCD491-0170-46C0-AB14-D71F88267A14	Not Available	Not Available	Not Available	A	Not Available	Not Available	Not Available	26	-25608		0	322
TCGA-5C-AAPD-01A-21R-A39D-07	Tumor	Yes	Yes	No	TCGA-5C-AAPD	405.45.0	Nationwide Children's Hospital	22	LIHC	DD565D81-0230-4946-B68B-E31957282B88	12	TCGA	2016																			None	Not Available	Not Available	Not Available	TCGA-5C-AAPD	7A6162A4-1166-4310-84CD-FFC2B06F124C	Not Available	Not Available	Not Available	A	Not Available	Not Available	Not Available	27	-22552		0	20
TCGA-5R-AA1C-01A-11R-A41C-07	Tumor	Yes	Yes	No	TCGA-5R-AA1C	425.45.0	Nationwide Children's Hospital	22	LIHC	74127A60-2212-47FF-B331-897F92BE2A08	12	TCGA	2016																			None	3.2	3.0	4.6	TCGA-5R-AA1C	290890EB-321C-45DC-9CD1-45676C6E5E96	0	1.8	Not Available	B	0.5	1.3	1.0	14	-21073		0	63
TCGA-5R-AA1D-01A-11R-A38B-07	Tumor	Yes	Yes	No	TCGA-5R-AA1D	399.48.0	Nationwide Children's Hospital	22	LIHC	3BBF394A-8E1B-4997-8ACD-129E4F975B1D	12	TCGA	2016																			None	3.2	3.3	4.6	TCGA-5R-AA1D	D3D3DBA9-139E-4F57-AC70-B741553D1687	0	0.5	Not Available	B	0.5	1.3	0.7	14	-6545		0	61
TCGA-5R-AAAM-01A-12R-A41C-07	Tumor	Yes	Yes	No	TCGA-5R-AAAM	425.45.0	Nationwide Children's Hospital	22	LIHC	EBD6C954-E165-46D6-B1A1-57783BCD2C58	12	TCGA	2016																			Severe	3.2	3.0	4.6	TCGA-5R-AAAM	477AFFB9-7C8B-4895-A4F3-6CC6EF8EC5E4	0	0.6	Not Available	A	0.5	1.3	0.7	14	-24020	46	0
TCGA-BC-4072-01B-11R-A155-07	Tumor	Yes	Yes	No	TCGA-BC-4072	131.77.0	Nationwide Children's Hospital	22	LIHC	BD215289-FB5D-4BB3-B6C0-ACECB2546046	12	TCGA	2016																			Not Available	3.5	4.4	5.0	TCGA-BC-4072	5c9a21a3-d471-401a-9568-59dc84245d28	0	.5	7	Not Available	.7	1.1	1	20	-27162	1490	0
TCGA-BC-4073-01B-02R-A131-07	Tumor	Yes	Yes	No	TCGA-BC-4073	100.78.0	Nationwide Children's Hospital	22	LIHC	CEB40D72-7C2D-47CD-BE8A-D1AEA4E80F3B	12	TCGA	2016																			Not Available	Not Available	Not Available	Not Available	TCGA-BC-4073	00f209c3-041a-4c6e-8b0f-6383eb3c85fc	0.0	0.7	3	Not Available	0.7	1.3	1.5	20	-26795		0	352
TCGA-BC-A10Q-01A-11R-A131-07	Tumor	Yes	Yes	No	TCGA-BC-A10Q	100.78.0	Nationwide Children's Hospital	22	LIHC	17AE4D15-47B4-42FA-BAFB-9BAB78965787	12	TCGA	2016	NO						TCGA-BC-A10Q-A13754	38B7049A-E74F-4548-9AAE-D604D4C697BD	4	YES	217	Other	Doxorubicon and Mitomycin C	Chemoembolization	Other, specify	PVA particles	4	2011	Not Available	3.5	4.1	5.0	TCGA-BC-A10Q	dfa15fbe-bb14-40ce-afc6-70694112e3e2	Not Available	.5	1	Not Available	0.7	1.1	0.6	23	-26400	1135	0
TCGA-BC-A10Q-11A-11R-A131-07	Normal	Yes	Yes	No	TCGA-BC-A10Q	100.78.0	Nationwide Children's Hospital	22	LIHC	17AE4D15-47B4-42FA-BAFB-9BAB78965787	12	TCGA	2016	NO						TCGA-BC-A10Q-A13754	38B7049A-E74F-4548-9AAE-D604D4C697BD	4	YES	217	Other	Doxorubicon and Mitomycin C	Chemoembolization	Other, specify	PVA particles	4	2011	Not Available	3.5	4.1	5.0	TCGA-BC-A10Q	dfa15fbe-bb14-40ce-afc6-70694112e3e2	Not Available	.5	1	Not Available	0.7	1.1	0.6	23	-26400	1135	0
TCGA-BC-A10R-01A-11R-A131-07	Tumor	Yes	Yes	No	TCGA-BC-A10R	100.78.0	Nationwide Children's Hospital	22	LIHC	48AF6375-2593-48F2-86C1-553C171D710E	12	TCGA	2016	NO						TCGA-BC-A10R-A13748	7DC35BE0-5FF4-4075-ADBC-348F148D5887	4	YES	237	Not Available	Not Applicable	Chemoembolization	Not Available	Not Applicable	4	2011	Mild	Not Available	4.0	Not Available	TCGA-BC-A10R	0bf5bbd4-d9e8-42a6-9ab5-f2c174dec12c	Not Available	Not Available	1	Not Available	0.7	1.1	0.7	23	-24274	308	0
TCGA-BC-A10R-11A-11R-A131-07	Normal	Yes	Yes	No	TCGA-BC-A10R	100.78.0	Nationwide Children's Hospital	22	LIHC	48AF6375-2593-48F2-86C1-553C171D710E	12	TCGA	2016	NO						TCGA-BC-A10R-A13748	7DC35BE0-5FF4-4075-ADBC-348F148D5887	4	YES	237	Not Available	Not Applicable	Chemoembolization	Not Available	Not Applicable	4	2011	Mild	Not Available	4.0	Not Available	TCGA-BC-A10R	0bf5bbd4-d9e8-42a6-9ab5-f2c174dec12c	Not Available	Not Available	1	Not Available	0.7	1.1	0.7	23	-24274	308	0
TCGA-BC-A10S-01A-22R-A131-07	Tumor	Yes	Yes	No	TCGA-BC-A10S	100.78.0	Nationwide Children's Hospital	22	LIHC	000ED418-0281-4DF6-9951-29A9E456AE8F	12	TCGA	2016																			None	Not Available	3.6	Not Available	TCGA-BC-A10S	592ef526-176a-42e0-bbeb-fb62d369a343	Not Available	0.6	Not Available	Not Available	Not Available	Not Available	Not Available	23	-29842	1423	0
TCGA-BC-A10T-01A-11R-A131-07	Tumor	Yes	Yes	No	TCGA-BC-A10T	100.78.0	Nationwide Children's Hospital	22	LIHC	0913A94A-7F62-49AD-9183-FB87091B9BCB	12	TCGA	2016																			Not Available	Not Available	3.0	Not Available	TCGA-BC-A10T	8a9cde9a-c38c-423e-bc14-354ee26468c9	Not Available	0.7	Not Available	Not Available	Not Available	Not Available	1.2	23	-27944	837	0
TCGA-BC-A10T-11A-11R-A131-07	Normal	Yes	Yes	No	TCGA-BC-A10T	100.78.0	Nationwide Children's Hospital	22	LIHC	0913A94A-7F62-49AD-9183-FB87091B9BCB	12	TCGA	2016																			Not Available	Not Available	3.0	Not Available	TCGA-BC-A10T	8a9cde9a-c38c-423e-bc14-354ee26468c9	Not Available	0.7	Not Available	Not Available	Not Available	Not Available	1.2	23	-27944	837	0
TCGA-BC-A10U-01A-11R-A131-07	Tumor	Yes	Yes	No	TCGA-BC-A10U	100.78.0	Nationwide Children's Hospital	22	LIHC	F8B3370F-7415-4F08-A191-4B38AD8C514C	12	TCGA	2016	YES	Radiofrequency Ablation	Not Applicable	614	2	1	TCGA-BC-A10U-A13749	C5B24C75-28AD-46A1-ACEB-8F74FEED26F8	4	NO	Not Available	Not Available	Not Applicable	Not Available	Not Available	Not Applicable	4	2011	Not Available	3.5	4.3	5.0	TCGA-BC-A10U	23103931-cc29-4f89-ae9c-79d53401ecea	0.0	0.4	4	Not Available	0.8	1.4	0.9	23	-25305	837	0
TCGA-BC-A10U-11A-11R-A131-07	Normal	Yes	Yes	No	TCGA-BC-A10U	100.78.0	Nationwide Children's Hospital	22	LIHC	F8B3370F-7415-4F08-A191-4B38AD8C514C	12	TCGA	2016	YES	Radiofrequency Ablation	Not Applicable	614	2	1	TCGA-BC-A10U-A13749	C5B24C75-28AD-46A1-ACEB-8F74FEED26F8	4	NO	Not Available	Not Available	Not Applicable	Not Available	Not Available	Not Applicable	4	2011	Not Available	3.5	4.3	5.0	TCGA-BC-A10U	23103931-cc29-4f89-ae9c-79d53401ecea	0.0	0.4	4	Not Available	0.8	1.4	0.9	23	-25305	837	0
TCGA-BC-A10W-01A-11R-A131-07	Tumor	Yes	Yes	No	TCGA-BC-A10W	100.78.0	Nationwide Children's Hospital	22	LIHC	69A3806A-B0A4-4D15-9E64-A04C6F472959	12	TCGA	2016																			Not Available	3.5	2.8	5.0	TCGA-BC-A10W	39baf24a-4032-4c23-b3fe-2c50df1881f6	0.0	1.4	1	Not Available	0.8	1.4	0.8	31	-18562	91	0
TCGA-BC-A10W-11A-11R-A131-07	Normal	Yes	Yes	No	TCGA-BC-A10W	100.78.0	Nationwide Children's Hospital	22	LIHC	69A3806A-B0A4-4D15-9E64-A04C6F472959	12	TCGA	2016																			Not Available	3.5	2.8	5.0	TCGA-BC-A10W	39baf24a-4032-4c23-b3fe-2c50df1881f6	0.0	1.4	1	Not Available	0.8	1.4	0.8	31	-18562	91	0
TCGA-BC-A10X-01A-11R-A131-07	Tumor	Yes	Yes	No	TCGA-BC-A10X	100.78.0	Nationwide Children's Hospital	22	LIHC	110DBAD2-5D19-41FB-9F3B-1B4F08658AD4	12	TCGA	2016																			None	3.5	3.6	5.0	TCGA-BC-A10X	3dc48ea9-a3c6-437f-af5a-88feb300cc5f	0.0	0.3	2	Not Available	0.7	1.1	0.7	31	-19140	770	0
TCGA-BC-A10X-11A-11R-A131-07	Normal	Yes	Yes	No	TCGA-BC-A10X	100.78.0	Nationwide Children's Hospital	22	LIHC	110DBAD2-5D19-41FB-9F3B-1B4F08658AD4	12	TCGA	2016																			None	3.5	3.6	5.0	TCGA-BC-A10X	3dc48ea9-a3c6-437f-af5a-88feb300cc5f	0.0	0.3	2	Not Available	0.7	1.1	0.7	31	-19140	770	0
TCGA-BC-A10Y-01A-11R-A131-07	Tumor	Yes	Yes	No	TCGA-BC-A10Y	100.78.0	Nationwide Children's Hospital	22	LIHC	32BBFD9D-3113-41AA-AB6C-07B9926EE731	12	TCGA	2016	YES	Radiofrequency Ablation	Not Applicable	0	2	1	TCGA-BC-A10Y-A13752	7B52CE23-0D78-4CD7-BE6D-BD49B670EBE2	4	YES	420;470;527	Other;Other;Other	Doxorubicin and Mitomycin C;Doxorubicin and Mitomycin C;Doxorubicin and Mitomycin C	Chemoembolization;Chemoembolization;Chemoembolization	Other, specify;Other, specify;Other, specify	Embosphere/gelfoam;Embosphere/gelfoam;spherical PVA/gelfoam	4	2011	None	3.5	4.0	5.0	TCGA-BC-A10Y	6533648f-1353-4253-b65b-d472aacf5751	0.0	0.5	Not Available	Not Available	0.9	1.4	1.0	31	-28049	711	0
TCGA-BC-A10Y-11A-11R-A131-07	Normal	Yes	Yes	No	TCGA-BC-A10Y	100.78.0	Nationwide Children's Hospital	22	LIHC	32BBFD9D-3113-41AA-AB6C-07B9926EE731	12	TCGA	2016	YES	Radiofrequency Ablation	Not Applicable	0	2	1	TCGA-BC-A10Y-A13752	7B52CE23-0D78-4CD7-BE6D-BD49B670EBE2	4	YES	420;470;527	Other;Other;Other	Doxorubicin and Mitomycin C;Doxorubicin and Mitomycin C;Doxorubicin and Mitomycin C	Chemoembolization;Chemoembolization;Chemoembolization	Other, specify;Other, specify;Other, specify	Embosphere/gelfoam;Embosphere/gelfoam;spherical PVA/gelfoam	4	2011	None	3.5	4.0	5.0	TCGA-BC-A10Y	6533648f-1353-4253-b65b-d472aacf5751	0.0	0.5	Not Available	Not Available	0.9	1.4	1.0	31	-28049	711	0
TCGA-BC-A10Z-01A-11R-A131-07	Tumor	Yes	Yes	No	TCGA-BC-A10Z	100.78.0	Nationwide Children's Hospital	22	LIHC	8C004128-E347-4A9A-B975-0635F19B8DFD	12	TCGA	2016																			None	3.5	3.1	5.0	TCGA-BC-A10Z	709f1e4d-f5e8-4a0b-8254-23f037f4bae7	0.0	0.6	1	Not Available	0.7	1.1	1.2	1	-22913	34	0
TCGA-BC-A10Z-11A-11R-A131-07	Normal	Yes	Yes	No	TCGA-BC-A10Z	100.78.0	Nationwide Children's Hospital	22	LIHC	8C004128-E347-4A9A-B975-0635F19B8DFD	12	TCGA	2016																			None	3.5	3.1	5.0	TCGA-BC-A10Z	709f1e4d-f5e8-4a0b-8254-23f037f4bae7	0.0	0.6	1	Not Available	0.7	1.1	1.2	1	-22913	34	0
TCGA-BC-A110-01A-11R-A131-07	Tumor	Yes	Yes	No	TCGA-BC-A110	100.78.0	Nationwide Children's Hospital	22	LIHC	C1D4A1FD-2CDE-47E7-8DF1-248968FE9AAA	12	TCGA	2016																			Not Available	3.5	3.7	5.0	TCGA-BC-A110	cf028bce-d20d-42b8-8507-1ec94a391e85	0.0	0.3	2	Not Available	0.7	1.1	3.5	1	-18951	2116	0
TCGA-BC-A110-11A-11R-A131-07	Normal	Yes	Yes	No	TCGA-BC-A110	100.78.0	Nationwide Children's Hospital	22	LIHC	C1D4A1FD-2CDE-47E7-8DF1-248968FE9AAA	12	TCGA	2016																			Not Available	3.5	3.7	5.0	TCGA-BC-A110	cf028bce-d20d-42b8-8507-1ec94a391e85	0.0	0.3	2	Not Available	0.7	1.1	3.5	1	-18951	2116	0
TCGA-BC-A112-01A-11R-A131-07	Tumor	Yes	Yes	No	TCGA-BC-A112	100.78.0	Nationwide Children's Hospital	22	LIHC	329779F9-991E-42A0-BED6-22A977E6A199	12	TCGA	2016																			Not Available	3.5	4.1	5.0	TCGA-BC-A112	a2c17e87-d8bc-4160-88ae-e3e894d013e4	0.0	0.3	Not Available	Not Available	0.7	1.3	2.1	1	-29511	153	0
TCGA-BC-A216-01A-11R-A155-07	Tumor	Yes	Yes	No	TCGA-BC-A216	131.77.0	Nationwide Children's Hospital	22	LIHC	CDD2A63A-AF46-4663-A837-39DA35EF49B2	12	TCGA	2016																			Mild	3.5	3.4	5.0	TCGA-BC-A216	4bbdbe77-f3cb-4b64-9826-72debb734784	0.0	0.6	2	Not Available	0.5	1.5	0.9	8	-22968		0	1144
TCGA-BC-A216-11A-11R-A155-07	Normal	Yes	Yes	No	TCGA-BC-A216	131.77.0	Nationwide Children's Hospital	22	LIHC	CDD2A63A-AF46-4663-A837-39DA35EF49B2	12	TCGA	2016																			Mild	3.5	3.4	5.0	TCGA-BC-A216	4bbdbe77-f3cb-4b64-9826-72debb734784	0.0	0.6	2	Not Available	0.5	1.5	0.9	8	-22968		0	1144
TCGA-BC-A217-01A-11R-A155-07	Tumor	Yes	Yes	No	TCGA-BC-A217	131.77.0	Nationwide Children's Hospital	22	LIHC	D37C15B6-8B9E-4AF7-80F2-DF9DDA37094E	12	TCGA	2016																			None	3.5	4.4	5.0	TCGA-BC-A217	6dcfc418-ab28-4365-95ea-c1ae254f2341	0.0	0.2	Not Available	Not Available	0.6	1.0	0.8	8	-27411		0	421
TCGA-BC-A3KF-01A-11R-A213-07	Tumor	Yes	Yes	No	TCGA-BC-A3KF	203.73.0	Nationwide Children's Hospital	22	LIHC	B5B7BA1F-F558-4005-81D7-48099897C5EA	12	TCGA	2016																			Not Available	Not Available	Not Available	Not Available	TCGA-BC-A3KF	07DD49FC-8A76-41E8-9EB3-107336F68701	Not Available	Not Available	2	Not Available	0.6	1.0	0.8	19	-24328		0	8
TCGA-BC-A3KG-01A-11R-A213-07	Tumor	Yes	Yes	No	TCGA-BC-A3KG	203.73.0	Nationwide Children's Hospital	22	LIHC	1F0D5DD6-1497-467E-BEBB-85B7BB7324F7	12	TCGA	2016																			Not Available	3.5	3.6	5.0	TCGA-BC-A3KG	75F43FCA-200A-48B0-BB67-0693D7B91119	0.0	0.5	Not Available	Not Available	0.6	1.0	0.7	19	-25061		0	252
TCGA-BC-A5W4-01A-11R-A28V-07	Tumor	Yes	Yes	No	TCGA-BC-A5W4	303.59.0	Nationwide Children's Hospital	22	LIHC	398C65E4-98F2-4B55-A79B-CE957E9BDE26	12	TCGA	2016																			None	3.5	4.2	5.0	TCGA-BC-A5W4	6BB5D506-8FCA-43F3-90A6-03C915D7EDE2	0.0	0.6	Not Available	A	0.70	1.30	Not Available	20	-25503		0	289
TCGA-BC-A69H-01A-11R-A311-07	Tumor	Yes	Yes	No	TCGA-BC-A69H	314.59.0	Nationwide Children's Hospital	22	LIHC	09E8B8BE-684F-4989-AD69-9F4CDCE87592	12	TCGA	2016																			None	3.6	4.3	4.8	TCGA-BC-A69H	79DF037C-7D37-4E6C-A654-57708A4F87AA	0.0	0.4	Not Available	A	0.8	1.3	0.8	18	-23380		0	120
TCGA-BC-A69I-01A-11R-A311-07	Tumor	Yes	Yes	No	TCGA-BC-A69I	314.59.0	Nationwide Children's Hospital	22	LIHC	BB24619E-AF8D-408C-BAFC-9A71391D5FB7	12	TCGA	2016																			None	Not Available	Not Available	Not Available	TCGA-BC-A69I	70AECC90-17F0-4064-8EBB-BE81F9B1D7FD	0.0	1.2	1	Unknown	0.7	1.3	1.2	18	-25370		0	16
TCGA-BC-A8YO-01A-11R-A37K-07	Tumor	Yes	Yes	No	TCGA-BC-A8YO	384.50.0	Nationwide Children's Hospital	22	LIHC	A1792037-D0FF-4F08-BB14-82311663BF0F	12	TCGA	2016																			None	3.5	4.3	5.0	TCGA-BC-A8YO	F53A70D9-A774-4969-896E-2DCDD4D02A7A	0.0	0.3	3	Unknown	0.6	1.0	0.8	10	-24189		0	227
TCGA-BD-A2L6-01A-11R-A213-07	Tumor	Yes	Yes	No	TCGA-BD-A2L6	203.73.0	Nationwide Children's Hospital	22	LIHC	21387AA4-2457-4C5D-81B0-4E42466CB59E	12	TCGA	2016																			None	3.4	3.7	5.0	TCGA-BD-A2L6	13A97CEE-76B0-46A1-B728-D87B2248311E	0.3	0.9	Not Available	A	0.5	1.4	1.2	10	-25489		0	289
TCGA-BD-A2L6-11A-21R-A213-07	Normal	Yes	Yes	No	TCGA-BD-A2L6	203.73.0	Nationwide Children's Hospital	22	LIHC	21387AA4-2457-4C5D-81B0-4E42466CB59E	12	TCGA	2016																			None	3.4	3.7	5.0	TCGA-BD-A2L6	13A97CEE-76B0-46A1-B728-D87B2248311E	0.3	0.9	Not Available	A	0.5	1.4	1.2	10	-25489		0	289
TCGA-BD-A3EP-01A-11R-A22L-07	Tumor	Yes	Yes	No	TCGA-BD-A3EP	231.65.0	Nationwide Children's Hospital	22	LIHC	6328BEF7-34BE-4105-BA7E-5197436CF209	12	TCGA	2016																			Mild	3.4	3.8	5.0	TCGA-BD-A3EP	DE302B98-250D-42FE-9945-11E1B2BBD3C6	0.3	0.6	0	A	0.5	1.4	1.1	21	-27756		0	409
TCGA-BD-A3EP-11A-12R-A22L-07	Normal	Yes	Yes	No	TCGA-BD-A3EP	231.65.0	Nationwide Children's Hospital	22	LIHC	6328BEF7-34BE-4105-BA7E-5197436CF209	12	TCGA	2016																			Mild	3.4	3.8	5.0	TCGA-BD-A3EP	DE302B98-250D-42FE-9945-11E1B2BBD3C6	0.3	0.6	0	A	0.5	1.4	1.1	21	-27756		0	409
TCGA-BD-A3ER-01A-11R-A213-07	Tumor	Yes	Yes	No	TCGA-BD-A3ER	203.73.0	Nationwide Children's Hospital	22	LIHC	F773F9DE-204C-4008-841B-70557D6B6547	12	TCGA	2016																			Mild	3.4	3.9	5.0	TCGA-BD-A3ER	9457A9A1-3DD1-4D88-B1E1-D20AAE4491DD	0.3	0.7	0	A	0.5	1.4	0.9	21	-22657		0	146
TCGA-BW-A5NO-01A-11R-A27V-07	Tumor	Yes	Yes	No	TCGA-BW-A5NO	287.61.0	Nationwide Children's Hospital	22	LIHC	03EEE137-4530-4A26-847D-EA2D622DDCC0	12	TCGA	2016																			Unknown	Not Available	Not Available	Not Available	TCGA-BW-A5NO	EE63C44B-91F4-4004-8DEA-192EAB527036	Not Available	Not Available	Not Available	Unknown	Not Available	Not Available	Not Available	26	-18510		0	20
TCGA-BW-A5NP-01A-11R-A27V-07	Tumor	Yes	Yes	No	TCGA-BW-A5NP	287.61.0	Nationwide Children's Hospital	22	LIHC	716C6A79-6D1E-46DC-BD7D-363BDF0CB2D4	12	TCGA	2016																			Mild	Not Available	Not Available	Not Available	TCGA-BW-A5NP	56A82A56-0241-4D3D-9DE2-696B0C36DF91	Not Available	Not Available	Not Available	Unknown	Not Available	Not Available	Not Available	26	-9809		0	0
TCGA-BW-A5NQ-01A-11R-A27V-07	Tumor	Yes	Yes	No	TCGA-BW-A5NQ	287.61.0	Nationwide Children's Hospital	22	LIHC	D6CEF88B-617C-4B25-97FD-FDD1031D85EC	12	TCGA	2016																			Unknown	Not Available	Not Available	Not Available	TCGA-BW-A5NQ	C7F1B389-AEC7-4993-8AFB-B7A56064F8FC	Not Available	Not Available	Not Available	Unknown	Not Available	Not Available	Not Available	26	-23353		0	0
TCGA-CC-5258-01A-01R-A131-07	Tumor	Yes	Yes	No	TCGA-CC-5258	100.78.0	Nationwide Children's Hospital	22	LIHC	D6B91466-9B02-4349-BF2C-AC789CCC4C28	12	TCGA	2016																			Not Available	Not Available	Not Available	Not Available	TCGA-CC-5258	6a93206a-c25c-4e45-b0ba-0a21bd8253b6	Not Available	Not Available	Not Available	Not Available	Not Available	Not Available	Not Available	15	-17586		0	0
TCGA-CC-5259-01A-31R-A213-07	Tumor	Yes	Yes	No	TCGA-CC-5259	203.73.0	Nationwide Children's Hospital	22	LIHC	BB11DBF0-FAFE-494B-887F-9F1F46F4FBCD	12	TCGA	2016																			Not Available	Not Available	Not Available	Not Available	TCGA-CC-5259	7444EEA6-90E8-42DD-A7B5-0AFC6D96E1E8	Not Available	Not Available	Not Available	Not Available	Not Available	Not Available	Not Available	6	-21946		0	5
TCGA-CC-5260-01A-01R-A131-07	Tumor	Yes	Yes	No	TCGA-CC-5260	100.78.0	Nationwide Children's Hospital	22	LIHC	42F252EA-2EB4-44DF-A320-391CAF51DAA4	12	TCGA	2016																			Not Available	Not Available	Not Available	Not Available	TCGA-CC-5260	ca8afb2c-be3d-41e8-8dbc-19fe7ab6154b	Not Available	Not Available	Not Available	Not Available	Not Available	Not Available	Not Available	15	-22345		0	0
TCGA-CC-5261-01A-01R-A131-07	Tumor	Yes	Yes	No	TCGA-CC-5261	100.78.0	Nationwide Children's Hospital	22	LIHC	E4BEFD50-BCA7-4AF2-AC57-C00DD5660117	12	TCGA	2016																			Not Available	Not Available	Not Available	Not Available	TCGA-CC-5261	1ad7f17e-b3b8-40e9-aab8-5a17e0aec408	Not Available	Not Available	Not Available	Not Available	Not Available	Not Available	Not Available	18	-16373		0	12
TCGA-CC-5262-01A-01R-A131-07	Tumor	Yes	Yes	No	TCGA-CC-5262	100.78.0	Nationwide Children's Hospital	22	LIHC	903D5769-193C-476B-A8C1-3569E4FC17E2	12	TCGA	2016																			Not Available	Not Available	Not Available	Not Available	TCGA-CC-5262	1b428ada-eb3f-40c2-b4bf-1bbf6b61729d	Not Available	Not Available	Not Available	Not Available	Not Available	Not Available	Not Available	2	-24787		0	0
TCGA-CC-5263-01A-01R-A131-07	Tumor	Yes	Yes	No	TCGA-CC-5263	100.78.0	Nationwide Children's Hospital	22	LIHC	EFD04710-56BF-433E-B7F2-C0539AC232BE	12	TCGA	2016																			Not Available	Not Available	Not Available	Not Available	TCGA-CC-5263	a6af3061-1484-4f6c-bb4b-c8f4626b4161	Not Available	Not Available	Not Available	Not Available	Not Available	Not Available	Not Available	18	-12863	129	0
TCGA-CC-5264-01A-01R-A131-07	Tumor	Yes	Yes	No	TCGA-CC-5264	100.78.0	Nationwide Children's Hospital	22	LIHC	CD4122C2-F7E3-4860-8773-DE2D5CB1D750	12	TCGA	2016																			Not Available	Not Available	Not Available	Not Available	TCGA-CC-5264	61902cb6-b041-48ac-aacc-483a28949865	Not Available	Not Available	Not Available	Not Available	Not Available	Not Available	Not Available	18	-25979		0	0
TCGA-CC-A123-01A-11R-A131-07	Tumor	Yes	Yes	No	TCGA-CC-A123	100.78.0	Nationwide Children's Hospital	22	LIHC	8D1305D7-A76C-41AD-AC12-381E2542DCB4	12	TCGA	2016																			Not Available	Not Available	Not Available	Not Available	TCGA-CC-A123	e2f6d3aa-b817-4193-a550-8e53265aa336	Not Available	Not Available	Not Available	Not Available	Not Available	Not Available	Not Available	18	-9107		0	-8
TCGA-CC-A1HT-01A-11R-A131-07	Tumor	Yes	Yes	No	TCGA-CC-A1HT	100.78.0	Nationwide Children's Hospital	22	LIHC	50F27E0C-86D8-48AB-91B3-538ECB3C0B4A	12	TCGA	2016																			Not Available	Not Available	Not Available	Not Available	TCGA-CC-A1HT	670c1cbc-4494-45f1-bb8b-18db82d4f7e0	Not Available	Not Available	Not Available	Not Available	Not Available	Not Available	Not Available	2	-18553		0	0
TCGA-CC-A3M9-01A-11R-A213-07	Tumor	Yes	Yes	No	TCGA-CC-A3M9	203.73.0	Nationwide Children's Hospital	22	LIHC	D8B6587D-93A1-4C31-9BF2-8BAA14B5F168	12	TCGA	2016																			Not Available	Not Available	Not Available	Not Available	TCGA-CC-A3M9	8E938868-D992-47C4-BECB-93B0F7FFFE07	Not Available	Not Available	Not Available	Not Available	Not Available	Not Available	Not Available	6	-16460		0	3
TCGA-CC-A3MA-01A-11R-A213-07	Tumor	Yes	Yes	No	TCGA-CC-A3MA	203.73.0	Nationwide Children's Hospital	22	LIHC	E863EDF1-64FA-4299-98F8-DAC86327E1E3	12	TCGA	2016																			Not Available	Not Available	Not Available	Not Available	TCGA-CC-A3MA	613DDB95-14D7-4941-B374-FB5CD344D1BB	Not Available	Not Available	Not Available	Not Available	Not Available	Not Available	Not Available	6	-22375		0	2
TCGA-CC-A3MB-01A-11R-A213-07	Tumor	Yes	Yes	No	TCGA-CC-A3MB	203.73.0	Nationwide Children's Hospital	22	LIHC	6AD5F40D-11F0-4F1B-923E-CED6EFABC994	12	TCGA	2016																			Not Available	Not Available	Not Available	Not Available	TCGA-CC-A3MB	2C53D48D-E3BC-49F3-BBE0-2EEE24252B4C	Not Available	Not Available	Not Available	Not Available	Not Available	Not Available	Not Available	6	-13255		0	3
TCGA-CC-A3MC-01A-11R-A22L-07	Tumor	Yes	Yes	No	TCGA-CC-A3MC	231.65.0	Nationwide Children's Hospital	22	LIHC	6A84E09B-394E-4B41-A4E3-0A02788CA6A7	12	TCGA	2016																			Not Available	Not Available	Not Available	Not Available	TCGA-CC-A3MC	0277F393-3743-47D6-A96F-155BAEC9EB49	Not Available	Not Available	Not Available	Not Available	Not Available	Not Available	Not Available	6	-20067		0	4
TCGA-CC-A5UC-01A-11R-A28V-07	Tumor	Yes	Yes	No	TCGA-CC-A5UC	303.59.0	Nationwide Children's Hospital	22	LIHC	6F742B76-D2B9-4D03-A56C-5F9216D45A73	12	TCGA	2016																			Not Available	Not Available	Not Available	Not Available	TCGA-CC-A5UC	7E589EE1-FFCC-448A-A275-829CA26A597E	Not Available	Not Available	Not Available	Unknown	Not Available	Not Available	Not Available	21	-23156		0	0
TCGA-CC-A5UD-01A-11R-A28V-07	Tumor	Yes	Yes	No	TCGA-CC-A5UD	303.59.0	Nationwide Children's Hospital	22	LIHC	BD094F10-79DA-4EFD-90A8-E6B7614AF1F9	12	TCGA	2016																			Not Available	Not Available	Not Available	Not Available	TCGA-CC-A5UD	3837C8AC-6C9E-499B-A4E7-D42C870BCB49	Not Available	Not Available	Not Available	Unknown	Not Available	Not Available	Not Available	21	-16702		0	0
TCGA-CC-A5UE-01A-11R-A28V-07	Tumor	Yes	Yes	No	TCGA-CC-A5UE	303.59.0	Nationwide Children's Hospital	22	LIHC	790DC62C-F345-46C3-AEE8-AC5C460B05EE	12	TCGA	2016																			Not Available	Not Available	Not Available	Not Available	TCGA-CC-A5UE	23D8E6A0-FA79-4323-A0A6-2DEA2A319667	Not Available	Not Available	Not Available	Unknown	Not Available	Not Available	Not Available	21	-17805		0	0
TCGA-CC-A7IE-01A-21R-A38B-07	Tumor	Yes	Yes	No	TCGA-CC-A7IE	399.48.0	Nationwide Children's Hospital	22	LIHC	42F0C8DB-3454-4749-9AD1-562B828BF4D7	12	TCGA	2016																			Not Available	Not Available	Not Available	Not Available	TCGA-CC-A7IE	220F75D7-08A4-4936-B4B2-0750E87CCDF5	Not Available	Not Available	Not Available	Unknown	Not Available	Not Available	Not Available	22	-20985		0	0
TCGA-CC-A7IF-01A-11R-A33J-07	Tumor	Yes	Yes	No	TCGA-CC-A7IF	341.53.0	Nationwide Children's Hospital	22	LIHC	EDF7F425-0C1F-4E5F-9D9C-4C703FFFF091	12	TCGA	2016																			Not Available	Not Available	Not Available	Not Available	TCGA-CC-A7IF	E0674B82-2FBA-421E-BE62-58EFD0348D44	Not Available	Not Available	Not Available	Unknown	Not Available	Not Available	Not Available	22	-21845		0	0
TCGA-CC-A7IG-01A-11R-A33J-07	Tumor	Yes	Yes	No	TCGA-CC-A7IG	341.53.0	Nationwide Children's Hospital	22	LIHC	E3A1B614-8551-4AF9-8C7A-0EFC926C71AF	12	TCGA	2016																			Not Available	Not Available	Not Available	Not Available	TCGA-CC-A7IG	534A7B11-3ABD-4581-A9C9-D984D6AA33A0	Not Available	Not Available	Not Available	Unknown	Not Available	Not Available	Not Available	22	-17453		0	0
TCGA-CC-A7IH-01A-11R-A33J-07	Tumor	Yes	Yes	No	TCGA-CC-A7IH	341.53.0	Nationwide Children's Hospital	22	LIHC	437FD279-496D-4126-BFD9-F3979DEB8E3D	12	TCGA	2016																			Not Available	Not Available	Not Available	Not Available	TCGA-CC-A7IH	E4E0BC11-AD61-4419-857C-44FB5C7877A3	Not Available	Not Available	Not Available	Unknown	Not Available	Not Available	Not Available	22	-21381		0	0
TCGA-CC-A7II-01A-11R-A33J-07	Tumor	Yes	Yes	No	TCGA-CC-A7II	341.53.0	Nationwide Children's Hospital	22	LIHC	DF345BB0-3B89-474E-9D79-5558D10032A4	12	TCGA	2016																			Not Available	Not Available	Not Available	Not Available	TCGA-CC-A7II	AAF7C9B5-6CB7-42BF-A0D1-07975EAE3BE9	Not Available	Not Available	Not Available	Unknown	Not Available	Not Available	Not Available	22	-20079		0	0
TCGA-CC-A7IJ-01A-11R-A33R-07	Tumor	Yes	Yes	No	TCGA-CC-A7IJ	345.53.0	Nationwide Children's Hospital	22	LIHC	AAE94CB5-CC27-4C66-BF8C-46803FAE6DC5	12	TCGA	2016																			Not Available	Not Available	Not Available	Not Available	TCGA-CC-A7IJ	E610A644-0504-445A-BBA1-4BAE360DE4C1	Not Available	Not Available	Not Available	Unknown	Not Available	Not Available	Not Available	22	-20751		0	0
TCGA-CC-A7IK-01A-12R-A33R-07	Tumor	Yes	Yes	No	TCGA-CC-A7IK	345.53.0	Nationwide Children's Hospital	22	LIHC	D3C9C518-0906-4A80-9B40-2D8883B40F4B	12	TCGA	2016																			Not Available	Not Available	Not Available	Not Available	TCGA-CC-A7IK	EBA5208B-404A-45DF-9133-31FF122E7FC0	Not Available	Not Available	Not Available	Unknown	Not Available	Not Available	Not Available	22	-21552		0	0
TCGA-CC-A7IL-01A-11R-A33R-07	Tumor	Yes	Yes	No	TCGA-CC-A7IL	345.53.0	Nationwide Children's Hospital	22	LIHC	5494D94D-DDEA-40FF-B38C-A3F57EC8D73E	12	TCGA	2016																			Not Available	Not Available	Not Available	Not Available	TCGA-CC-A7IL	B54DF65F-8A6B-4405-9918-90D53418804C	Not Available	Not Available	Not Available	Unknown	Not Available	Not Available	Not Available	22	-22319		0	0
TCGA-CC-A8HS-01A-11R-A36F-07	Tumor	Yes	Yes	No	TCGA-CC-A8HS	377.51.0	Nationwide Children's Hospital	22	LIHC	4EC5715C-F927-468F-8CF2-C4532CA719CB	12	TCGA	2016																			Not Available	Not Available	Not Available	Not Available	TCGA-CC-A8HS	D18CD259-267E-47B5-9353-AD3454E048A0	Not Available	Not Available	Not Available	Unknown	Not Available	Not Available	Not Available	22	-6617		0	0
TCGA-CC-A8HT-01A-11R-A36F-07	Tumor	Yes	Yes	No	TCGA-CC-A8HT	377.51.0	Nationwide Children's Hospital	22	LIHC	CF320DC8-F85A-41F4-B9E3-2D89AA47AA51	12	TCGA	2016																			Not Available	Not Available	Not Available	Not Available	TCGA-CC-A8HT	95408571-9D4E-412B-8EE8-7992E0270B0F	Not Available	Not Available	Not Available	Unknown	Not Available	Not Available	Not Available	22	-27334		0	0
TCGA-CC-A8HU-01A-11R-A36F-07	Tumor	Yes	Yes	No	TCGA-CC-A8HU	377.51.0	Nationwide Children's Hospital	22	LIHC	C729392D-8F4C-400D-ADD9-38EF1D7DB7F6	12	TCGA	2016																			Not Available	Not Available	Not Available	Not Available	TCGA-CC-A8HU	1943FF2C-CA53-4E3C-ACC1-5AE84F4BA230	Not Available	Not Available	Not Available	Unknown	Not Available	Not Available	Not Available	22	-14367		0	0
TCGA-CC-A8HV-01A-11R-A36F-07	Tumor	Yes	Yes	No	TCGA-CC-A8HV	377.51.0	Nationwide Children's Hospital	22	LIHC	947F140F-D86A-43DE-9A8C-8ECA27CD13F8	12	TCGA	2016																			Not Available	Not Available	Not Available	Not Available	TCGA-CC-A8HV	5B32D3F4-9B88-42DE-AAAC-22D1D2F5CDE0	Not Available	Not Available	Not Available	Unknown	Not Available	Not Available	Not Available	22	-18935		0	0
TCGA-CC-A9FS-01A-11R-A37K-07	Tumor	Yes	Yes	No	TCGA-CC-A9FS	384.50.0	Nationwide Children's Hospital	22	LIHC	D95DA6C3-8746-4108-A455-6A815EC6C1AF	12	TCGA	2016																			Not Available	Not Available	Not Available	Not Available	TCGA-CC-A9FS	F661A921-2E59-424B-A145-E22664B73728	Not Available	Not Available	Not Available	Unknown	Not Available	Not Available	Not Available	22	-20157		0	0
TCGA-CC-A9FU-01A-11R-A37K-07	Tumor	Yes	Yes	No	TCGA-CC-A9FU	384.50.0	Nationwide Children's Hospital	22	LIHC	B5128C4B-92AC-4FD1-BF7F-7E4EDF8022DC	12	TCGA	2016																			Not Available	Not Available	Not Available	Not Available	TCGA-CC-A9FU	5E2A99A1-41C1-49CA-97D6-69F9B9938D24	Not Available	Not Available	Not Available	Unknown	Not Available	Not Available	Not Available	22	-19326		0	0
TCGA-CC-A9FV-01A-11R-A37K-07	Tumor	Yes	Yes	No	TCGA-CC-A9FV	384.50.0	Nationwide Children's Hospital	22	LIHC	945382F3-DA0B-4EF0-9C40-B43404A686F7	12	TCGA	2016																			Not Available	Not Available	Not Available	Not Available	TCGA-CC-A9FV	C4E6527A-8F58-4F6B-93B1-04ABB5680ED0	Not Available	Not Available	Not Available	Unknown	Not Available	Not Available	Not Available	22	-21044		0	0
TCGA-CC-A9FW-01A-11R-A37K-07	Tumor	Yes	Yes	No	TCGA-CC-A9FW	384.50.0	Nationwide Children's Hospital	22	LIHC	43C272DF-60F4-4049-A736-30039C9CDE44	12	TCGA	2016																			Not Available	Not Available	Not Available	Not Available	TCGA-CC-A9FW	027322F0-D720-41F8-897C-A10E5C1424C5	Not Available	Not Available	Not Available	Unknown	Not Available	Not Available	Not Available	22	-24891		0	0
TCGA-DD-A113-01A-11R-A131-07	Tumor	Yes	Yes	No	TCGA-DD-A113	100.78.0	Nationwide Children's Hospital	22	LIHC	7F4565B0-F5DD-4CA9-96C2-56604261CC57	12	TCGA	2016	YES	Other;Other;Other	percutaneous laser ablation;percutaneous laser ablation;percutaneous laser ablation	1994;2232;2351	1;3;1	1;1;1	TCGA-DD-A113-A43738	EE8FD1C9-41B0-4929-BDE9-08321DBA7EF2	2	NO	Not Available;Not Available;Not Available	Not Available;Not Available;Not Available	Not Applicable;Not Applicable;Not Applicable	Not Available;Not Available;Not Available	Not Available;Not Available;Not Available	Not Applicable;Not Applicable;Not Applicable	6	2013	None	3.5	4.3	5.0	TCGA-DD-A113	aeb17d2b-fa8c-4989-bf3a-d2c74b785455	0.1	0.5	Not Available	A	0.7	1.2	0.8	29	-20188		0	1678
TCGA-DD-A113-11A-12R-A131-07	Normal	Yes	Yes	No	TCGA-DD-A113	100.78.0	Nationwide Children's Hospital	22	LIHC	7F4565B0-F5DD-4CA9-96C2-56604261CC57	12	TCGA	2016	YES	Other;Other;Other	percutaneous laser ablation;percutaneous laser ablation;percutaneous laser ablation	1994;2232;2351	1;3;1	1;1;1	TCGA-DD-A113-A43738	EE8FD1C9-41B0-4929-BDE9-08321DBA7EF2	2	NO	Not Available;Not Available;Not Available	Not Available;Not Available;Not Available	Not Applicable;Not Applicable;Not Applicable	Not Available;Not Available;Not Available	Not Available;Not Available;Not Available	Not Applicable;Not Applicable;Not Applicable	6	2013	None	3.5	4.3	5.0	TCGA-DD-A113	aeb17d2b-fa8c-4989-bf3a-d2c74b785455	0.1	0.5	Not Available	A	0.7	1.2	0.8	29	-20188		0	1678
TCGA-DD-A114-01A-11R-A131-07	Tumor	Yes	Yes	No	TCGA-DD-A114	100.78.0	Nationwide Children's Hospital	22	LIHC	4D8CEB97-6323-494B-B23E-D046566001F1	12	TCGA	2016																			Mild	3.5	3.5	5.0	TCGA-DD-A114	02931491-f56b-4233-a079-812e08bc0c59	0.1	2.5	Not Available	A	0.9	1.4	1.2	29	-15410	1149	0
TCGA-DD-A114-11A-12R-A131-07	Normal	Yes	Yes	No	TCGA-DD-A114	100.78.0	Nationwide Children's Hospital	22	LIHC	4D8CEB97-6323-494B-B23E-D046566001F1	12	TCGA	2016																			Mild	3.5	3.5	5.0	TCGA-DD-A114	02931491-f56b-4233-a079-812e08bc0c59	0.1	2.5	Not Available	A	0.9	1.4	1.2	29	-15410	1149	0
TCGA-DD-A115-01A-11R-A131-07	Tumor	Yes	Yes	No	TCGA-DD-A115	100.78.0	Nationwide Children's Hospital	22	LIHC	576D2562-B176-4B81-BB19-BAC808B48B96	12	TCGA	2016	YES	Other	alcohol ablation	855	Not Available	1	TCGA-DD-A115-A42009	78525079-E6FC-4EFF-9561-63014E747D02	9	YES	1121;1170;1281;1477	Doxorubicin;Doxorubicin;Doxorubicin;Doxorubicin	Not Applicable;Not Applicable;Not Applicable;Not Applicable	Chemoembolization;Chemoembolization;Chemoembolization;Chemoembolization	Other, specify;Not Available;Other, specify;Other, specify	Doxorubicin, mitomycin, and Ivalon;Not Applicable;chemoembolic mixture;chemoembolic mixture	4	2013	None	3.5	4.1	5.0	TCGA-DD-A115	45b566d7-f120-471c-a94a-be7936889f2d	0.1	0.6	Not Available	A	0.1	1.2	1.1	29	-19697	2542	0
TCGA-DD-A116-01A-11R-A131-07	Tumor	Yes	Yes	No	TCGA-DD-A116	100.78.0	Nationwide Children's Hospital	22	LIHC	EB8D7023-DB11-4175-8F92-0EAAE719FBC3	12	TCGA	2016																			Not Available	3.5	4.1	5.0	TCGA-DD-A116	994347ba-3045-4ade-926f-06420fbd906c	0.1	1.1	0	A	0.8	1.4	1.1	29	-24934	1622	0
TCGA-DD-A116-11A-12R-A26B-07	Normal	Yes	Yes	No	TCGA-DD-A116	100.78.0	Nationwide Children's Hospital	22	LIHC	EB8D7023-DB11-4175-8F92-0EAAE719FBC3	12	TCGA	2016																			Not Available	3.5	4.1	5.0	TCGA-DD-A116	994347ba-3045-4ade-926f-06420fbd906c	0.1	1.1	0	A	0.8	1.4	1.1	29	-24934	1622	0
TCGA-DD-A118-01A-11R-A131-07	Tumor	Yes	Yes	No	TCGA-DD-A118	100.78.0	Nationwide Children's Hospital	22	LIHC	D39F85D5-212A-49AE-B167-F9D1C1814E57	12	TCGA	2016																			None	3.4	3.4	4.8	TCGA-DD-A118	7d914d07-f250-4c7a-8fa2-df14e708936e	0.1	0.5	Not Available	A	0.7	1.2	0.9	29	-28406		0	693
TCGA-DD-A118-11A-11R-A131-07	Normal	Yes	Yes	No	TCGA-DD-A118	100.78.0	Nationwide Children's Hospital	22	LIHC	D39F85D5-212A-49AE-B167-F9D1C1814E57	12	TCGA	2016																			None	3.4	3.4	4.8	TCGA-DD-A118	7d914d07-f250-4c7a-8fa2-df14e708936e	0.1	0.5	Not Available	A	0.7	1.2	0.9	29	-28406		0	693
TCGA-DD-A119-01A-11R-A131-07	Tumor	Yes	Yes	No	TCGA-DD-A119	100.78.0	Nationwide Children's Hospital	22	LIHC	6908AC09-D8DF-48C8-B709-ED50469172FE	12	TCGA	2016																			None	3.5	3.9	5.0	TCGA-DD-A119	66c6f413-b7a8-4d7c-9e1d-c4fb257b9e5c	0.1	1.6	2	A	0.9	1.4	1.3	29	-14613	223	0
TCGA-DD-A119-11A-11R-A131-07	Normal	Yes	Yes	No	TCGA-DD-A119	100.78.0	Nationwide Children's Hospital	22	LIHC	6908AC09-D8DF-48C8-B709-ED50469172FE	12	TCGA	2016																			None	3.5	3.9	5.0	TCGA-DD-A119	66c6f413-b7a8-4d7c-9e1d-c4fb257b9e5c	0.1	1.6	2	A	0.9	1.4	1.3	29	-14613	223	0
TCGA-DD-A11A-01A-11R-A131-07	Tumor	Yes	Yes	No	TCGA-DD-A11A	100.78.0	Nationwide Children's Hospital	22	LIHC	B3532B68-3C3A-4855-93DB-6301818F37CC	12	TCGA	2016																			None	Not Available	Not Available	Not Available	TCGA-DD-A11A	609c82fd-eb3a-46d7-8c09-0cde281a50b3	0.1	3.6	Not Available	Not Available	0.9	1.4	1.1	29	-24646		0	79
TCGA-DD-A11A-11A-11R-A131-07	Normal	Yes	Yes	No	TCGA-DD-A11A	100.78.0	Nationwide Children's Hospital	22	LIHC	B3532B68-3C3A-4855-93DB-6301818F37CC	12	TCGA	2016																			None	Not Available	Not Available	Not Available	TCGA-DD-A11A	609c82fd-eb3a-46d7-8c09-0cde281a50b3	0.1	3.6	Not Available	Not Available	0.9	1.4	1.1	29	-24646		0	79
TCGA-DD-A11B-01A-11R-A131-07	Tumor	Yes	Yes	No	TCGA-DD-A11B	100.78.0	Nationwide Children's Hospital	22	LIHC	A5751F18-F38E-487E-8745-5D2CC15817DC	12	TCGA	2016																			Mild	3.5	3.9	5.0	TCGA-DD-A11B	1b1b1af0-b19b-4086-b1b7-669fa0b88235	0.1	1.6	Not Available	A	0.9	1.4	1.0	29	-26857	14	0
TCGA-DD-A11B-11A-11R-A131-07	Normal	Yes	Yes	No	TCGA-DD-A11B	100.78.0	Nationwide Children's Hospital	22	LIHC	A5751F18-F38E-487E-8745-5D2CC15817DC	12	TCGA	2016																			Mild	3.5	3.9	5.0	TCGA-DD-A11B	1b1b1af0-b19b-4086-b1b7-669fa0b88235	0.1	1.6	Not Available	A	0.9	1.4	1.0	29	-26857	14	0
TCGA-DD-A11C-01A-11R-A131-07	Tumor	Yes	Yes	No	TCGA-DD-A11C	100.78.0	Nationwide Children's Hospital	22	LIHC	DA3B7666-BEF9-465D-88C6-955AD72EE9C2	12	TCGA	2016																			None	3.5	3.6	5.0	TCGA-DD-A11C	023a1ad1-fb16-437e-9806-5063b47f76bd	0.1	2.3	1	A	0.9	1.4	0.9	29	-25403		0	662
TCGA-DD-A11C-11A-11R-A131-07	Normal	Yes	Yes	No	TCGA-DD-A11C	100.78.0	Nationwide Children's Hospital	22	LIHC	DA3B7666-BEF9-465D-88C6-955AD72EE9C2	12	TCGA	2016																			None	3.5	3.6	5.0	TCGA-DD-A11C	023a1ad1-fb16-437e-9806-5063b47f76bd	0.1	2.3	1	A	0.9	1.4	0.9	29	-25403		0	662
TCGA-DD-A11D-01A-11R-A131-07	Tumor	Yes	Yes	No	TCGA-DD-A11D	100.78.0	Nationwide Children's Hospital	22	LIHC	3F83EE20-FBF7-4EBF-997F-4BC273051548	12	TCGA	2016	NO						TCGA-DD-A11D-A43743	1BD30F5B-B70D-4E68-8C90-E6658939E2A4	2	YES	1506	Other	Y90 Theraspheres	Radioembolization	Y-90 Therasphere	Not Applicable	6	2013	None	3.5	4.5	5.0	TCGA-DD-A11D	0ef95351-0133-4f34-a59c-90934fb161f8	0.1	0.5	2	A	0.6	1.1	1.1	29	-21003	1560	0
TCGA-DD-A11D-11A-12R-A131-07	Normal	Yes	Yes	No	TCGA-DD-A11D	100.78.0	Nationwide Children's Hospital	22	LIHC	3F83EE20-FBF7-4EBF-997F-4BC273051548	12	TCGA	2016	NO						TCGA-DD-A11D-A43743	1BD30F5B-B70D-4E68-8C90-E6658939E2A4	2	YES	1506	Other	Y90 Theraspheres	Radioembolization	Y-90 Therasphere	Not Applicable	6	2013	None	3.5	4.5	5.0	TCGA-DD-A11D	0ef95351-0133-4f34-a59c-90934fb161f8	0.1	0.5	2	A	0.6	1.1	1.1	29	-21003	1560	0
TCGA-DD-A1EA-01A-11R-A131-07	Tumor	Yes	Yes	No	TCGA-DD-A1EA	100.78.0	Nationwide Children's Hospital	22	LIHC	57939CCB-E87E-4CDF-8252-3B6DDB958D29	12	TCGA	2016	YES	Radiofrequency Ablation;Radiofrequency Ablation	Not Applicable;Not Applicable	769;1176	1;2	2;2	TCGA-DD-A1EA-A42205	D8522937-A679-4256-A8E3-256EA53BD593	15	NO	Not Available;Not Available	Not Available;Not Available	Not Applicable;Not Applicable	Not Available;Not Available	Not Available;Not Available	Not Applicable;Not Applicable	4	2013	Mild	3.5	3.3	5.0	TCGA-DD-A1EA	8052c374-9435-4588-b970-68565c56dbb7	0.1	0.9	1	A	0.8	1.3	1.2	16	-24925		0	2415
TCGA-DD-A1EB-01A-11R-A131-07	Tumor	Yes	Yes	No	TCGA-DD-A1EB	100.78.0	Nationwide Children's Hospital	22	LIHC	6D50B27E-1465-428E-B48B-D8C408D8018D	12	TCGA	2016	YES	Ethanol Injection;Ethanol Injection	Not Applicable;Not Applicable	506;731	Not Available;Not Available	Not Available;Not Available	TCGA-DD-A1EB-A42227	59CA7EF7-652C-416A-82B8-14E666059859	15	NO	Not Available;Not Available	Not Available;Not Available	Not Applicable;Not Applicable	Not Available;Not Available	Not Available;Not Available	Not Applicable;Not Applicable	5	2013	None	3.5	3.7	5.0	TCGA-DD-A1EB	68015cc7-d3a1-4c90-b8fb-5d14143d9960	0.1	0.3	1	B	0.6	1.1	1.3	9	-26471		0	2017
TCGA-DD-A1EB-11A-11R-A131-07	Normal	Yes	Yes	No	TCGA-DD-A1EB	100.78.0	Nationwide Children's Hospital	22	LIHC	6D50B27E-1465-428E-B48B-D8C408D8018D	12	TCGA	2016	YES	Ethanol Injection;Ethanol Injection	Not Applicable;Not Applicable	506;731	Not Available;Not Available	Not Available;Not Available	TCGA-DD-A1EB-A42227	59CA7EF7-652C-416A-82B8-14E666059859	15	NO	Not Available;Not Available	Not Available;Not Available	Not Applicable;Not Applicable	Not Available;Not Available	Not Available;Not Available	Not Applicable;Not Applicable	5	2013	None	3.5	3.7	5.0	TCGA-DD-A1EB	68015cc7-d3a1-4c90-b8fb-5d14143d9960	0.1	0.3	1	B	0.6	1.1	1.3	9	-26471		0	2017
TCGA-DD-A1EC-01A-21R-A131-07	Tumor	Yes	Yes	No	TCGA-DD-A1EC	100.78.0	Nationwide Children's Hospital	22	LIHC	E07A55E6-3986-4D0B-8510-A75785C49FF8	12	TCGA	2016																			None	3.5	3.2	5.0	TCGA-DD-A1EC	520a709a-87f6-4f3d-b2a2-9192e3b65c5b	0.1	0.4	Not Available	A	0.7	1.2	0.8	6	-7363		0	602
TCGA-DD-A1EC-11A-11R-A131-07	Normal	Yes	Yes	No	TCGA-DD-A1EC	100.78.0	Nationwide Children's Hospital	22	LIHC	E07A55E6-3986-4D0B-8510-A75785C49FF8	12	TCGA	2016																			None	3.5	3.2	5.0	TCGA-DD-A1EC	520a709a-87f6-4f3d-b2a2-9192e3b65c5b	0.1	0.4	Not Available	A	0.7	1.2	0.8	6	-7363		0	602
TCGA-DD-A1ED-01A-11R-A155-07	Tumor	Yes	Yes	No	TCGA-DD-A1ED	131.77.0	Nationwide Children's Hospital	22	LIHC	E214F6BF-554F-46C2-91FC-DAB06C72DB9F	12	TCGA	2016																			None	3.5	4.2	5.0	TCGA-DD-A1ED	0ff6364a-e6f4-47ca-a7e7-14705bf0a8df	0.1	0.8	Not Available	A	0.8	1.3	1.3	16	-25039		0	1629
TCGA-DD-A1EE-01A-11R-A131-07	Tumor	Yes	Yes	No	TCGA-DD-A1EE	100.78.0	Nationwide Children's Hospital	22	LIHC	80FAAE71-B8A6-4D55-94C5-BBEE2FF85425	12	TCGA	2016																			Severe	3.5	2.7	5.0	TCGA-DD-A1EE	654af137-70d9-4ee4-9f69-793e352d30f8	0.1	0.5	Not Available	B	0.8	1.3	1.2	10	-26858		0	204
TCGA-DD-A1EE-11A-11R-A131-07	Normal	Yes	Yes	No	TCGA-DD-A1EE	100.78.0	Nationwide Children's Hospital	22	LIHC	80FAAE71-B8A6-4D55-94C5-BBEE2FF85425	12	TCGA	2016																			Severe	3.5	2.7	5.0	TCGA-DD-A1EE	654af137-70d9-4ee4-9f69-793e352d30f8	0.1	0.5	Not Available	B	0.8	1.3	1.2	10	-26858		0	204
TCGA-DD-A1EF-01A-11R-A131-07	Tumor	Yes	Yes	No	TCGA-DD-A1EF	100.78.0	Nationwide Children's Hospital	22	LIHC	37ACC77D-6FD9-4DB9-BCB8-8ACBF3ECB443	12	TCGA	2016																			Mild	3.5	4.5	5.0	TCGA-DD-A1EF	1c1e8987-676f-417b-b3b4-e0321367df55	0.1	1.0	9	B	0.6	1.1	0.9	10	-21165	394	0
TCGA-DD-A1EG-01A-11R-A213-07	Tumor	Yes	Yes	No	TCGA-DD-A1EG	203.73.0	Nationwide Children's Hospital	22	LIHC	AFE90470-5F58-4D7D-84FC-C525B5BF1253	12	TCGA	2016	NO						TCGA-DD-A1EG-A43855	3171B121-F52B-4493-B41C-B53451B22CD5	4	YES	1034;1070;1156;1198	Other;Other;Other;Other	TheraSpere infusion;chemoembolic mixture;chemoembolic mixture;chemoembolic mixture	Chemoembolization;Chemoembolization;Chemoembolization;Chemoembolization	Y-90 Therasphere;Not Available;Not Available;Not Available	Not Applicable;Not Applicable;Not Applicable;Not Applicable	6	2013	Mild	3.5	4.2	5.0	TCGA-DD-A1EG	6C79F64B-63FE-46F5-BF7B-77208231B0F2	0.1	0.7	1	A	0.8	1.3	0.6	9	-28108	1372	0
TCGA-DD-A1EG-11A-11R-A213-07	Normal	Yes	Yes	No	TCGA-DD-A1EG	203.73.0	Nationwide Children's Hospital	22	LIHC	AFE90470-5F58-4D7D-84FC-C525B5BF1253	12	TCGA	2016	NO						TCGA-DD-A1EG-A43855	3171B121-F52B-4493-B41C-B53451B22CD5	4	YES	1034;1070;1156;1198	Other;Other;Other;Other	TheraSpere infusion;chemoembolic mixture;chemoembolic mixture;chemoembolic mixture	Chemoembolization;Chemoembolization;Chemoembolization;Chemoembolization	Y-90 Therasphere;Not Available;Not Available;Not Available	Not Applicable;Not Applicable;Not Applicable;Not Applicable	6	2013	Mild	3.5	4.2	5.0	TCGA-DD-A1EG	6C79F64B-63FE-46F5-BF7B-77208231B0F2	0.1	0.7	1	A	0.8	1.3	0.6	9	-28108	1372	0
TCGA-DD-A1EH-01A-11R-A131-07	Tumor	Yes	Yes	No	TCGA-DD-A1EH	100.78.0	Nationwide Children's Hospital	22	LIHC	4E47D93C-9B66-4DD3-8ACA-998D5F13BBA1	12	TCGA	2016	YES	Radiofrequency Ablation	Not Applicable	126	Not Available	1	TCGA-DD-A1EH-A45785	5BD6AA35-352F-459E-BFCB-FDD1929F1153	22	NO	Not Available	Not Available	Not Applicable	Not Available	Not Available	Not Applicable	7	2013	None	3.5	4.7	5.0	TCGA-DD-A1EH	cab5b264-abab-4bdb-816e-9d2c0ac30629	0.1	1.0	1	B	0.8	1.3	1.0	16	-8499		0	1036
TCGA-DD-A1EH-11A-11R-A131-07	Normal	Yes	Yes	No	TCGA-DD-A1EH	100.78.0	Nationwide Children's Hospital	22	LIHC	4E47D93C-9B66-4DD3-8ACA-998D5F13BBA1	12	TCGA	2016	YES	Radiofrequency Ablation	Not Applicable	126	Not Available	1	TCGA-DD-A1EH-A45785	5BD6AA35-352F-459E-BFCB-FDD1929F1153	22	NO	Not Available	Not Available	Not Applicable	Not Available	Not Available	Not Applicable	7	2013	None	3.5	4.7	5.0	TCGA-DD-A1EH	cab5b264-abab-4bdb-816e-9d2c0ac30629	0.1	1.0	1	B	0.8	1.3	1.0	16	-8499		0	1036
TCGA-DD-A1EI-01A-11R-A131-07	Tumor	Yes	Yes	No	TCGA-DD-A1EI	100.78.0	Nationwide Children's Hospital	22	LIHC	D37525CF-B284-45DF-B83D-C9FCAA57EC11	12	TCGA	2016																			Mild	3.5	5.1	5.0	TCGA-DD-A1EI	3acf7438-fd65-442c-8a30-68b6714537f3	0.1	0.7	0	B	0.8	1.3	0.9	10	-17097		0	183
TCGA-DD-A1EI-11A-11R-A131-07	Normal	Yes	Yes	No	TCGA-DD-A1EI	100.78.0	Nationwide Children's Hospital	22	LIHC	D37525CF-B284-45DF-B83D-C9FCAA57EC11	12	TCGA	2016																			Mild	3.5	5.1	5.0	TCGA-DD-A1EI	3acf7438-fd65-442c-8a30-68b6714537f3	0.1	0.7	0	B	0.8	1.3	0.9	10	-17097		0	183
TCGA-DD-A1EJ-01A-11R-A155-07	Tumor	Yes	Yes	No	TCGA-DD-A1EJ	131.77.0	Nationwide Children's Hospital	22	LIHC	F42FB6C8-E119-4127-94C9-64E6B0C695A4	12	TCGA	2016	NO						TCGA-DD-A1EJ-A42216	CB81B953-600C-4EA2-A887-9AC76DF2AC04	15	YES	277;300;424;495;760	Not Available;Not Available;Other;Other;Other	Not Applicable;Not Applicable;Doxorubicin/mitomycin;Doxorubicin/mitomycin;chemoembolic mixture	Radioembolization;Radioembolization;Chemoembolization;Chemoembolization;Chemoembolization	Y-90 Therasphere;Y-90 Therasphere;Not Available;Not Available;Not Available	Not Applicable;Not Applicable;Not Applicable;Not Applicable;Not Applicable	4	2013	Mild	3.2	3.5	5.0	TCGA-DD-A1EJ	52292ffc-0902-4d97-b461-20723987a177	0.1	0.7	1	B	0.6	1.1	0.6	10	-26009		0	887
TCGA-DD-A1EJ-11A-11R-A155-07	Normal	Yes	Yes	No	TCGA-DD-A1EJ	131.77.0	Nationwide Children's Hospital	22	LIHC	F42FB6C8-E119-4127-94C9-64E6B0C695A4	12	TCGA	2016	NO						TCGA-DD-A1EJ-A42216	CB81B953-600C-4EA2-A887-9AC76DF2AC04	15	YES	277;300;424;495;760	Not Available;Not Available;Other;Other;Other	Not Applicable;Not Applicable;Doxorubicin/mitomycin;Doxorubicin/mitomycin;chemoembolic mixture	Radioembolization;Radioembolization;Chemoembolization;Chemoembolization;Chemoembolization	Y-90 Therasphere;Y-90 Therasphere;Not Available;Not Available;Not Available	Not Applicable;Not Applicable;Not Applicable;Not Applicable;Not Applicable	4	2013	Mild	3.2	3.5	5.0	TCGA-DD-A1EJ	52292ffc-0902-4d97-b461-20723987a177	0.1	0.7	1	B	0.6	1.1	0.6	10	-26009		0	887
TCGA-DD-A1EK-01A-11R-A213-07	Tumor	Yes	Yes	No	TCGA-DD-A1EK	203.73.0	Nationwide Children's Hospital	22	LIHC	3DECCCFE-20E3-4EA3-B033-62F6FEC3F9E7	12	TCGA	2016	YES	Radiofrequency Ablation	Not Applicable	0	3	1	TCGA-DD-A1EK-A42206	61C165ED-E7E2-41EE-B4E9-C9368BA49FAC	15	YES	286	Not Available	Not Applicable	Chemoembolization	Not Available	Not Applicable	4	2013	Mild	3.5	4.3	5.0	TCGA-DD-A1EK	A5E4412B-0E49-4D86-9CCE-71F440A84048	0.1	0.5	1	A	0.6	1.1	0.7	9	-23437	558	0
TCGA-DD-A1EL-01A-11R-A155-07	Tumor	Yes	Yes	No	TCGA-DD-A1EL	131.77.0	Nationwide Children's Hospital	22	LIHC	6BC23F99-BC34-4443-A66B-0826F6F95D07	12	TCGA	2016	NO						TCGA-DD-A1EL-A42231	6CA54E88-D6C5-4F67-B456-159E16441697	15	YES	165	Not Available	Not Applicable	Chemoembolization	Other, specify	PVA particles	4	2013	Mild	3.5	4.4	5.0	TCGA-DD-A1EL	2854ffe8-1f77-497a-bf49-11e0189fee35	0.1	0.5	Not Available	A	0.8	1.3	1.0	16	-8573	415	0
TCGA-DD-A1EL-11A-11R-A155-07	Normal	Yes	Yes	No	TCGA-DD-A1EL	131.77.0	Nationwide Children's Hospital	22	LIHC	6BC23F99-BC34-4443-A66B-0826F6F95D07	12	TCGA	2016	NO						TCGA-DD-A1EL-A42231	6CA54E88-D6C5-4F67-B456-159E16441697	15	YES	165	Not Available	Not Applicable	Chemoembolization	Other, specify	PVA particles	4	2013	Mild	3.5	4.4	5.0	TCGA-DD-A1EL	2854ffe8-1f77-497a-bf49-11e0189fee35	0.1	0.5	Not Available	A	0.8	1.3	1.0	16	-8573	415	0
TCGA-DD-A39V-01A-11R-A213-07	Tumor	Yes	Yes	No	TCGA-DD-A39V	203.73.0	Nationwide Children's Hospital	22	LIHC	3D4E4EFA-1A2B-4D76-ADC8-B04698BC20B5	12	TCGA	2016																			None	3.5	4.0	5.0	TCGA-DD-A39V	DD056692-4E2A-4E45-A4D0-357AF9754F0E	Not Available	Not Available	3	A	0.8	1.2	0.9	5	-28254	643	0
TCGA-DD-A39V-11A-11R-A213-07	Normal	Yes	Yes	No	TCGA-DD-A39V	203.73.0	Nationwide Children's Hospital	22	LIHC	3D4E4EFA-1A2B-4D76-ADC8-B04698BC20B5	12	TCGA	2016																			None	3.5	4.0	5.0	TCGA-DD-A39V	DD056692-4E2A-4E45-A4D0-357AF9754F0E	Not Available	Not Available	3	A	0.8	1.2	0.9	5	-28254	643	0
TCGA-DD-A39W-01A-11R-A213-07	Tumor	Yes	Yes	No	TCGA-DD-A39W	203.73.0	Nationwide Children's Hospital	22	LIHC	B256535E-F4BC-45E9-8A55-50B573E7F904	12	TCGA	2016																			Not Available	Not Available	Not Available	Not Available	TCGA-DD-A39W	48D33449-B969-423A-B4E7-541809109617	Not Available	Not Available	Not Available	Not Available	Not Available	Not Available	Not Available	5	-10699	827	0
TCGA-DD-A39W-11A-11R-A213-07	Normal	Yes	Yes	No	TCGA-DD-A39W	203.73.0	Nationwide Children's Hospital	22	LIHC	B256535E-F4BC-45E9-8A55-50B573E7F904	12	TCGA	2016																			Not Available	Not Available	Not Available	Not Available	TCGA-DD-A39W	48D33449-B969-423A-B4E7-541809109617	Not Available	Not Available	Not Available	Not Available	Not Available	Not Available	Not Available	5	-10699	827	0
TCGA-DD-A39X-01A-11R-A213-07	Tumor	Yes	Yes	No	TCGA-DD-A39X	203.73.0	Nationwide Children's Hospital	22	LIHC	A218CECF-7FC3-4972-981C-62074B150F2B	12	TCGA	2016	YES	Radiofrequency Ablation	Not Applicable	1039	1	1	TCGA-DD-A39X-A42569	23D1697E-FE5C-4B31-9308-534FE20BB62E	25	NO	Not Available	Not Available	Not Applicable	Not Available	Not Available	Not Applicable	4	2013	None	3.5	4.1	5.0	TCGA-DD-A39X	0D0A10B4-7B99-4043-A129-89844F258156	0.1	0.5	2	A	0.6	0.9	0.9	5	-28528	1694	0
TCGA-DD-A39X-11A-11R-A213-07	Normal	Yes	Yes	No	TCGA-DD-A39X	203.73.0	Nationwide Children's Hospital	22	LIHC	A218CECF-7FC3-4972-981C-62074B150F2B	12	TCGA	2016	YES	Radiofrequency Ablation	Not Applicable	1039	1	1	TCGA-DD-A39X-A42569	23D1697E-FE5C-4B31-9308-534FE20BB62E	25	NO	Not Available	Not Available	Not Applicable	Not Available	Not Available	Not Applicable	4	2013	None	3.5	4.1	5.0	TCGA-DD-A39X	0D0A10B4-7B99-4043-A129-89844F258156	0.1	0.5	2	A	0.6	0.9	0.9	5	-28528	1694	0
TCGA-DD-A39Y-01A-11R-A213-07	Tumor	Yes	Yes	No	TCGA-DD-A39Y	203.73.0	Nationwide Children's Hospital	22	LIHC	7FE0270A-7CED-4288-974B-22CD25577C85	12	TCGA	2016																			None	3.5	4.0	5.0	TCGA-DD-A39Y	BED1D731-E382-4B80-9604-E6DD68D9C0AB	0.1	1.1	Not Available	A	1.2	12.0	0.8	5	-24769	171	0
TCGA-DD-A39Z-01A-11R-A213-07	Tumor	Yes	Yes	No	TCGA-DD-A39Z	203.73.0	Nationwide Children's Hospital	22	LIHC	6CB2805F-6130-4313-8319-5B3D39FD4CE9	12	TCGA	2016																			Not Available	3.5	3.1	5.0	TCGA-DD-A39Z	42CB60F0-1A9E-4F59-8E2E-50C25E85CB98	0.1	1.2	1	B	0.6	0.9	0.7	5	-15930	601	0
TCGA-DD-A39Z-11A-21R-A213-07	Normal	Yes	Yes	No	TCGA-DD-A39Z	203.73.0	Nationwide Children's Hospital	22	LIHC	6CB2805F-6130-4313-8319-5B3D39FD4CE9	12	TCGA	2016																			Not Available	3.5	3.1	5.0	TCGA-DD-A39Z	42CB60F0-1A9E-4F59-8E2E-50C25E85CB98	0.1	1.2	1	B	0.6	0.9	0.7	5	-15930	601	0
TCGA-DD-A3A1-01A-11R-A213-07	Tumor	Yes	Yes	No	TCGA-DD-A3A1	203.73.0	Nationwide Children's Hospital	22	LIHC	708BC79F-62DE-4EBF-922F-EEBA3B47CE91	12	TCGA	2016																			None	3.5	3.8	5.0	TCGA-DD-A3A1	877B9F6B-9B34-40ED-933F-8FEF204EDF21	0.1	0.8	1	A	0.8	1.2	1.1	6	-24046	233	0
TCGA-DD-A3A1-11A-11R-A213-07	Normal	Yes	Yes	No	TCGA-DD-A3A1	203.73.0	Nationwide Children's Hospital	22	LIHC	708BC79F-62DE-4EBF-922F-EEBA3B47CE91	12	TCGA	2016																			None	3.5	3.8	5.0	TCGA-DD-A3A1	877B9F6B-9B34-40ED-933F-8FEF204EDF21	0.1	0.8	1	A	0.8	1.2	1.1	6	-24046	233	0
TCGA-DD-A3A2-01A-11R-A213-07	Tumor	Yes	Yes	No	TCGA-DD-A3A2	203.73.0	Nationwide Children's Hospital	22	LIHC	EB51FA63-A9AD-486D-A7BF-9D4361C92F74	12	TCGA	2016																			None	3.5	4.2	5.0	TCGA-DD-A3A2	357C1C08-F368-4CAE-8F20-9BE241B30479	0.1	0.5	Not Available	A	0.6	0.9	0.8	5	-27930	2131	0
TCGA-DD-A3A2-11A-11R-A213-07	Normal	Yes	Yes	No	TCGA-DD-A3A2	203.73.0	Nationwide Children's Hospital	22	LIHC	EB51FA63-A9AD-486D-A7BF-9D4361C92F74	12	TCGA	2016																			None	3.5	4.2	5.0	TCGA-DD-A3A2	357C1C08-F368-4CAE-8F20-9BE241B30479	0.1	0.5	Not Available	A	0.6	0.9	0.8	5	-27930	2131	0
TCGA-DD-A3A3-01A-11R-A22L-07	Tumor	Yes	Yes	No	TCGA-DD-A3A3	231.65.0	Nationwide Children's Hospital	22	LIHC	5DA866F3-6E17-4892-BDA9-9339E0AA64BE	12	TCGA	2016																			None	Not Available	Not Available	Not Available	TCGA-DD-A3A3	516C8594-2973-41E5-A5CE-76D177EDFA48	0.1	0.9	Not Available	B	0.8	1.2	1.2	6	-16708	535	0
TCGA-DD-A3A3-11A-11R-A22L-07	Normal	Yes	Yes	No	TCGA-DD-A3A3	231.65.0	Nationwide Children's Hospital	22	LIHC	5DA866F3-6E17-4892-BDA9-9339E0AA64BE	12	TCGA	2016																			None	Not Available	Not Available	Not Available	TCGA-DD-A3A3	516C8594-2973-41E5-A5CE-76D177EDFA48	0.1	0.9	Not Available	B	0.8	1.2	1.2	6	-16708	535	0
TCGA-DD-A3A4-01A-11R-A22L-07	Tumor	Yes	Yes	No	TCGA-DD-A3A4	231.65.0	Nationwide Children's Hospital	22	LIHC	F845107B-E7B2-4624-AA3A-3DDE7B77E8EB	12	TCGA	2016	NO						TCGA-DD-A3A4-A42699	E888B66F-EC27-412B-8CDF-A97F9598C732	27	YES	231;270;375	Other;Other;Other	Mitomycin C and cis-platinum;Mitomycin C and cis-platinum;Mitomycin C and cis-platinum	Chemoembolization;Chemoembolization;Chemoembolization	Other, specify;Other, specify;Other, specify	chemoembolic agent;chemoembolic agent;chemoembolic agen	4	2013	None	3.5	3.3	5.0	TCGA-DD-A3A4	AB35C9F9-3040-424D-A89F-DFF3A1365BC6	0.1	1.0	2	B	0.4	1.2	1.0	6	-13739	612	0
TCGA-DD-A3A4-11A-11R-A22L-07	Normal	Yes	Yes	No	TCGA-DD-A3A4	231.65.0	Nationwide Children's Hospital	22	LIHC	F845107B-E7B2-4624-AA3A-3DDE7B77E8EB	12	TCGA	2016	NO						TCGA-DD-A3A4-A42699	E888B66F-EC27-412B-8CDF-A97F9598C732	27	YES	231;270;375	Other;Other;Other	Mitomycin C and cis-platinum;Mitomycin C and cis-platinum;Mitomycin C and cis-platinum	Chemoembolization;Chemoembolization;Chemoembolization	Other, specify;Other, specify;Other, specify	chemoembolic agent;chemoembolic agent;chemoembolic agen	4	2013	None	3.5	3.3	5.0	TCGA-DD-A3A4	AB35C9F9-3040-424D-A89F-DFF3A1365BC6	0.1	1.0	2	B	0.4	1.2	1.0	6	-13739	612	0
TCGA-DD-A3A5-01A-11R-A22L-07	Tumor	Yes	Yes	No	TCGA-DD-A3A5	231.65.0	Nationwide Children's Hospital	22	LIHC	AD6283D9-F105-4240-AA77-0BBC195EC723	12	TCGA	2016	NO						TCGA-DD-A3A5-A42572	DE62BB09-B68C-42AB-B933-D4B5995B733C	23	YES	260	Not Available	Not Applicable	Chemoembolization	Not Available	Not Applicable	4	2013	None	3.5	4.2	5.0	TCGA-DD-A3A5	D8549D23-37D4-42BD-B472-F49BBEBD09B0	0.1	0.8	Not Available	A	0.6	0.9	0.7	5	-24288	3125	0
TCGA-DD-A3A5-11A-11R-A22L-07	Normal	Yes	Yes	No	TCGA-DD-A3A5	231.65.0	Nationwide Children's Hospital	22	LIHC	AD6283D9-F105-4240-AA77-0BBC195EC723	12	TCGA	2016	NO						TCGA-DD-A3A5-A42572	DE62BB09-B68C-42AB-B933-D4B5995B733C	23	YES	260	Not Available	Not Applicable	Chemoembolization	Not Available	Not Applicable	4	2013	None	3.5	4.2	5.0	TCGA-DD-A3A5	D8549D23-37D4-42BD-B472-F49BBEBD09B0	0.1	0.8	Not Available	A	0.6	0.9	0.7	5	-24288	3125	0
TCGA-DD-A3A6-01A-11R-A22L-07	Tumor	Yes	Yes	No	TCGA-DD-A3A6	231.65.0	Nationwide Children's Hospital	22	LIHC	63C434DD-2694-42E4-8D80-5BA4F3B0D6F9	12	TCGA	2016																			None	3.5	4.3	5.0	TCGA-DD-A3A6	C4C4820B-6F4C-4CDD-B233-4D22F5933FD9	0.1	0.4	Not Available	A	0.6	0.9	1.0	6	-26319	3258	0
TCGA-DD-A3A6-11A-11R-A22L-07	Normal	Yes	Yes	No	TCGA-DD-A3A6	231.65.0	Nationwide Children's Hospital	22	LIHC	63C434DD-2694-42E4-8D80-5BA4F3B0D6F9	12	TCGA	2016																			None	3.5	4.3	5.0	TCGA-DD-A3A6	C4C4820B-6F4C-4CDD-B233-4D22F5933FD9	0.1	0.4	Not Available	A	0.6	0.9	1.0	6	-26319	3258	0
TCGA-DD-A3A7-01A-11R-A22L-07	Tumor	Yes	Yes	No	TCGA-DD-A3A7	231.65.0	Nationwide Children's Hospital	22	LIHC	05921F00-EDEE-4CDB-8D5F-CFB3A25E3D55	12	TCGA	2016																			Mild	Not Available	Not Available	Not Available	TCGA-DD-A3A7	614C0ECF-6A84-4C86-8706-79BE5BB00991	0.1	0.8	4	Unknown	0.8	1.2	1.4	9	-24599	419	0
TCGA-DD-A3A8-01A-11R-A22L-07	Tumor	Yes	Yes	No	TCGA-DD-A3A8	231.65.0	Nationwide Children's Hospital	22	LIHC	BCAB858D-FC00-41E0-BF26-2BA996F81245	12	TCGA	2016																			None	Not Available	Not Available	Not Available	TCGA-DD-A3A8	69D6881B-9E9A-407B-8B02-BAD5FC2455BF	0.1	1.0	3	A	0.8	1.2	0.9	6	-27524	11	0
TCGA-DD-A3A8-11A-11R-A22L-07	Normal	Yes	Yes	No	TCGA-DD-A3A8	231.65.0	Nationwide Children's Hospital	22	LIHC	BCAB858D-FC00-41E0-BF26-2BA996F81245	12	TCGA	2016																			None	Not Available	Not Available	Not Available	TCGA-DD-A3A8	69D6881B-9E9A-407B-8B02-BAD5FC2455BF	0.1	1.0	3	A	0.8	1.2	0.9	6	-27524	11	0
TCGA-DD-A3A9-01A-11R-A266-07	Tumor	Yes	Yes	No	TCGA-DD-A3A9	275.62.0	Nationwide Children's Hospital	22	LIHC	673C8AB9-CC3E-479E-8FD4-9742E337D2F4	12	TCGA	2016																			None	3.5	4.0	5.0	TCGA-DD-A3A9	457CCA7C-A8B4-414E-A3C0-7FCCF0EE2034	0.1	0.3	Not Available	A	0.6	0.9	0.9	5	-23526	931	0
TCGA-DD-A4NA-01A-11R-A266-07	Tumor	Yes	Yes	No	TCGA-DD-A4NA	275.62.0	Nationwide Children's Hospital	22	LIHC	20A9BF4A-B37E-4F04-A920-E34EB4FD1F68	12	TCGA	2016																			None	Not Available	Not Available	Not Available	TCGA-DD-A4NA	BEE9D6C8-948F-4B76-97CA-B985064249EF	Not Available	Not Available	2	Unknown	0.6	1.1	0.8	21	-24603		0	1008
TCGA-DD-A4NB-01A-12R-A266-07	Tumor	Yes	Yes	No	TCGA-DD-A4NB	275.62.0	Nationwide Children's Hospital	22	LIHC	B55B3388-93D7-488F-A8F7-E000445C9020	12	TCGA	2016																			Mild	Not Available	Not Available	Not Available	TCGA-DD-A4NB	1983FADE-44F1-41E0-8983-F2CE8D649655	0.1	1.0	2	Unknown	0.8	1.3	0.8	18	-9426		0	391
TCGA-DD-A4ND-01A-11R-A266-07	Tumor	Yes	Yes	No	TCGA-DD-A4ND	275.62.0	Nationwide Children's Hospital	22	LIHC	CD554BC6-2F76-432E-8C07-522E1EBD9581	12	TCGA	2016																			None	3.5	3.9	5	TCGA-DD-A4ND	C0BF9278-9CBB-4361-B4D8-AB172B67E276	0.1	0.5	3	A	0.6	1.1	0.7	18	-20782		0	2141
TCGA-DD-A4NE-01A-11R-A27V-07	Tumor	Yes	Yes	No	TCGA-DD-A4NE	287.61.0	Nationwide Children's Hospital	22	LIHC	81E13B2F-4194-43E8-9875-8EA2AAE4CCA5	12	TCGA	2016																			None	3.5	4.2	5.0	TCGA-DD-A4NE	BCE25281-502E-4599-9679-32DC8462FFB1	0.1	0.9	3	A	0.6	1.0	0.8	21	-27549	660	0
TCGA-DD-A4NF-01A-11R-A27V-07	Tumor	Yes	Yes	No	TCGA-DD-A4NF	287.61.0	Nationwide Children's Hospital	22	LIHC	DC7EA7AF-90C7-456B-AD0A-68C83C4267FE	12	TCGA	2016																			Mild	3.5	4	5.0	TCGA-DD-A4NF	1043BC90-72C9-48C9-AE24-F617D0485E78	0.1	0.5	Not Available	A	0.8	1.3	0.9	29	-26330		0	428
TCGA-DD-A4NG-01A-11R-A27V-07	Tumor	Yes	Yes	No	TCGA-DD-A4NG	287.61.0	Nationwide Children's Hospital	22	LIHC	586024AC-2523-4213-A094-73E0148AE584	12	TCGA	2016																			None	3.5	4.5	5.0	TCGA-DD-A4NG	89791F8F-DC06-4A04-B166-AFBFD6CF53DE	0.1	0.5	1	A	0.8	1.3	0.9	29	-28234		0	445
TCGA-DD-A4NH-01A-11R-A27V-07	Tumor	Yes	Yes	No	TCGA-DD-A4NH	287.61.0	Nationwide Children's Hospital	22	LIHC	D9EEA5DA-D8D2-4E5E-BB73-E30408049131	12	TCGA	2016																			None	3.5	4.0	5.0	TCGA-DD-A4NH	4012EA90-5768-4ACC-AF3A-BA954F493DB4	0.1	0.6	1	A	0.6	1.1	0.8	29	-23865		0	433
TCGA-DD-A4NI-01A-11R-A27V-07	Tumor	Yes	Yes	No	TCGA-DD-A4NI	287.61.0	Nationwide Children's Hospital	22	LIHC	3BBFB51C-98C8-4FFF-AF47-7B2B43B7702A	12	TCGA	2016																			Unknown	3.5	4.4	5.0	TCGA-DD-A4NI	518AA9CC-71CF-4734-9D55-B435DA99D300	0.1	0.6	6	A	0.8	1.3	1.1	29	-24516		0	328
TCGA-DD-A4NJ-01A-11R-A27V-07	Tumor	Yes	Yes	No	TCGA-DD-A4NJ	287.61.0	Nationwide Children's Hospital	22	LIHC	D7317F0A-1FD3-4FC5-9ECF-16B0A1BA0603	12	TCGA	2016	YES	Radiofrequency Ablation	Not Applicable	577	Not Available	1	TCGA-DD-A4NJ-A49652	138B9C68-C27D-4F7F-9EA2-D034888BDB34	7	NO	Not Available	Not Available	Not Applicable	Not Available	Not Available	Not Applicable	10	2013	Mild	3.5	4.7	5.0	TCGA-DD-A4NJ	815DFFB0-0C22-4E05-868C-26E6C553980A	0.1	0.4	1	A	0.6	1.1	0.7	5	-19964		0	458
TCGA-DD-A4NK-01A-11R-A28V-07	Tumor	Yes	Yes	No	TCGA-DD-A4NK	303.59.0	Nationwide Children's Hospital	22	LIHC	A2DBCD7C-A3CD-4F37-AEB5-71CC950EB18B	12	TCGA	2016	NO						TCGA-DD-A4NK-A43137	1C367DCC-24E5-449B-9392-4AC3076FAA2E	13	YES	917	Not Available	Not Applicable	Chemoembolization	Y-90 Therasphere	Not Applicable	5	2013	None	3.5	4.1	5.0	TCGA-DD-A4NK	5B8D04B2-EF40-4216-A3BB-42520EFBE863	0.1	0.5	3	A	0.7	1.2	1.1	5	-29244	1210	0
TCGA-DD-A4NL-01A-11R-A28V-07	Tumor	Yes	Yes	No	TCGA-DD-A4NL	303.59.0	Nationwide Children's Hospital	22	LIHC	5947153A-CAC0-4203-BD84-9FDD61E69C93	12	TCGA	2016																			None	3.5	4.4	5.0	TCGA-DD-A4NL	E0067280-2722-46F2-A5A8-352C77B47E38	0.1	0.3	Not Available	Unknown	0.8	1.3	1.0	5	-16874		0	1711
TCGA-DD-A4NN-01A-11R-A28V-07	Tumor	Yes	Yes	No	TCGA-DD-A4NN	303.59.0	Nationwide Children's Hospital	22	LIHC	C53039AF-896B-461A-93F0-D76E9FBBE166	12	TCGA	2016																			Unknown	3.5	4.3	5.0	TCGA-DD-A4NN	B96B7620-5506-4DEF-AFF2-5E888EAF3EA5	0.1	0.5	1	A	0.7	1.2	0.9	5	-20548	899	0
TCGA-DD-A4NO-01A-11R-A28V-07	Tumor	Yes	Yes	No	TCGA-DD-A4NO	303.59.0	Nationwide Children's Hospital	22	LIHC	8253A8CC-7B7D-46D4-8B45-6CA44AB6468F	12	TCGA	2016	YES	Radiofrequency Ablation;Other	Not Applicable;cryoablation	2244;2244	1;1	1;1	TCGA-DD-A4NO-A49664	229D0F16-E4C6-4694-8F51-BA228820B968	7	YES	1051;Not Available	Other;Not Available	embolic agent;Not Applicable	Chemoembolization;Not Available	Other, specify;Not Available	embolic agent;Not Applicable	10	2013	Mild	3.5	4.5	5.0	TCGA-DD-A4NO	75F78C38-6854-4390-AD11-789B4E549D63	0.1	0.4	Not Available	A	0.8	1.3	1.6	5	-24090		0	1869
TCGA-DD-A4NP-01A-11R-A28V-07	Tumor	Yes	Yes	No	TCGA-DD-A4NP	303.59.0	Nationwide Children's Hospital	22	LIHC	8F0AC6BC-1AE0-4EF0-9067-26A846535DFE	12	TCGA	2016	YES	Radiofrequency Ablation;Radiofrequency Ablation	Not Applicable;Not Applicable	1309;2807	1;1	1;1	TCGA-DD-A4NP-A49668	06609191-6ABF-403E-B125-A194B805FD89	7	NO	Not Available;Not Available	Not Available;Not Available	Not Applicable;Not Applicable	Not Available;Not Available	Not Available;Not Available	Not Applicable;Not Applicable	10	2013	None	3.5	2.4	5.0	TCGA-DD-A4NP	001887AA-36D0-463F-8BCA-DEC7043B4F2E	0.1	0.7	Not Available	B	0.9	1.4	1.9	5	-11838		0	2849
TCGA-DD-A4NQ-01A-21R-A28V-07	Tumor	Yes	Yes	No	TCGA-DD-A4NQ	303.59.0	Nationwide Children's Hospital	22	LIHC	6A3633DB-848E-4D67-800D-61B3E2BD6474	12	TCGA	2016	NO						TCGA-DD-A4NQ-A43378	73A0E12B-2408-4494-9858-C79A32E695B3	20	YES	148;211	Not Available;Not Available	Not Applicable;Not Applicable	Radioembolization;Radioembolization	Y-90 Therasphere;Y-90 Therasphere	Not Applicable;Not Applicable	5	2013	Mild	3.5	4.4	5.0	TCGA-DD-A4NQ	C05720FE-19C1-4CFF-819B-6806B26FC312	0.1	0.7	1	A	0.8	1.3	0.8	11	-22111	373	0
TCGA-DD-A4NR-01A-11R-A311-07	Tumor	Yes	Yes	No	TCGA-DD-A4NR	314.59.0	Nationwide Children's Hospital	22	LIHC	FBBDFDA1-F3AA-4DC6-82DE-8FD74BDD55FB	12	TCGA	2016																			Unknown	3.5	3.1	5.0	TCGA-DD-A4NR	52A7F734-DA07-49C5-861D-C70DA37FF959	0.1	0.8	1	A	0.7	1.2	1.0	11	-31386	9	0
TCGA-DD-A4NS-01A-11R-A311-07	Tumor	Yes	Yes	No	TCGA-DD-A4NS	314.59.0	Nationwide Children's Hospital	22	LIHC	034937F1-758D-4C9E-BCF8-5EEFE9859244	12	TCGA	2016																			None	Not Available	Not Available	Not Available	TCGA-DD-A4NS	A6A3F07C-CED4-451B-B2E5-C93E4ED622C1	0.1	0.9	2	Unknown	0.7	1.2	1.1	11	-22638	2456	0
TCGA-DD-A4NV-01A-11R-A311-07	Tumor	Yes	Yes	No	TCGA-DD-A4NV	314.59.0	Nationwide Children's Hospital	22	LIHC	9EAF6596-3ECD-42BD-97B2-454DAA330314	12	TCGA	2016																			None	3.5	3.9	5.0	TCGA-DD-A4NV	8E5CE60B-2EDA-482D-B109-210DF1321AFF	0.1	0.5	1	A	0.8	1.3	0.8	11	-22438		0	2018
TCGA-DD-A73A-01A-12R-A32O-07	Tumor	Yes	Yes	No	TCGA-DD-A73A	327.54.0	Nationwide Children's Hospital	22	LIHC	FBC16689-22CA-434C-9282-4B7B233ED428	12	TCGA	2016																			Mild	3.5	4.4	5.0	TCGA-DD-A73A	B6C0266A-CF34-464A-808D-1D3C28DC90F2	0.1	1.2	Not Available	A	0.8	1.3	1.4	30	-26136		0	334
TCGA-DD-A73B-01A-12R-A32O-07	Tumor	Yes	Yes	No	TCGA-DD-A73B	327.54.0	Nationwide Children's Hospital	22	LIHC	514B1228-8978-44A4-8019-41E74A26C2A0	12	TCGA	2016																			Unknown	3.5	3.5	5.0	TCGA-DD-A73B	5449C232-56F1-4E03-9421-ABA3AE180107	0.1	2.1	1	B	0.6	1.1	0.9	30	-26390	283	0
TCGA-DD-A73C-01A-12R-A33J-07	Tumor	Yes	Yes	No	TCGA-DD-A73C	341.53.0	Nationwide Children's Hospital	22	LIHC	6A5D82B0-105E-49CE-81D1-DFDF4A1C6BCA	12	TCGA	2016																			None	3.5	4.9	5.0	TCGA-DD-A73C	79F9331C-9E00-4277-A9D1-7C848E132134	0.1	0.7	1	A	0.6	1.1	0.8	30	-23782		0	230
TCGA-DD-A73D-01A-12R-A32O-07	Tumor	Yes	Yes	No	TCGA-DD-A73D	327.54.0	Nationwide Children's Hospital	22	LIHC	51D0E0C6-F53D-4DFE-976D-A27E2100E1E7	12	TCGA	2016																			Mild	3.5	4.5	5.0	TCGA-DD-A73D	24170A77-94E0-4002-9D3E-A46C84E84FCA	0.1	0.3	1	A	0.6	1.1	0.8	30	-24941		0	334
TCGA-DD-A73E-01A-12R-A32O-07	Tumor	Yes	Yes	No	TCGA-DD-A73E	327.54.0	Nationwide Children's Hospital	22	LIHC	1D6979FB-94D4-45C8-835B-0F7E00D4A8BF	12	TCGA	2016																			Mild	3.5	4.7	5.0	TCGA-DD-A73E	E0863874-F7B8-49B6-A88B-5AE5F1EC2B15	0.1	0.4	2	A	0.8	1.3	1.2	30	-24377		0	44
TCGA-DD-A73F-01A-11R-A32O-07	Tumor	Yes	Yes	No	TCGA-DD-A73F	327.54.0	Nationwide Children's Hospital	22	LIHC	E60CF0FA-1A02-4793-A411-8E2CE818AC12	12	TCGA	2016																			None	3.5	4.6	5.0	TCGA-DD-A73F	870C86E7-D6E1-4F9D-BB0B-BD1C66D6BCDE	0.1	0.5	1	A	0.6	1.1	1.0	30	-28234		0	843
TCGA-DD-A73G-01A-22R-A32O-07	Tumor	Yes	Yes	No	TCGA-DD-A73G	327.54.0	Nationwide Children's Hospital	22	LIHC	017AC401-981B-46F4-8D93-1D8BA1437A93	12	TCGA	2016																			None	3.5	3.2	5.0	TCGA-DD-A73G	4774367C-5D8F-4B23-934A-E6D33A89DCA8	0.1	0.5	1	A	0.7	1.2	0.7	1	-26949		0	3071
TCGA-DD-AA3A-01A-11R-A37K-07	Tumor	Yes	Yes	No	TCGA-DD-AA3A	384.50.0	Nationwide Children's Hospital	22	LIHC	5ABBCF83-C0B4-49EA-B43C-A2B19941DCF8	12	TCGA	2016																			None	3.5	4.9	5.0	TCGA-DD-AA3A	56ABD1C1-8F22-4856-8B0A-73D7E092BDB3	0.1	0.8	1	A	0.6	1.1	0.7	27	-29712	410	0
TCGA-DD-AAC8-01A-11R-A41C-07	Tumor	Yes	Yes	No	TCGA-DD-AAC8	425.45.0	Nationwide Children's Hospital	22	LIHC	725CC53E-008A-4E77-B242-E8B33AAE664D	12	TCGA	2016																			Mild	3.8	4.3	5.3	TCGA-DD-AAC8	496BEEF9-80D9-4734-A23D-334AE1B6AAAB	0.2	0.6	Not Available	A	0.7	1.5	1.1	28	-26322	16	0
TCGA-DD-AAC9-01A-11R-A41C-07	Tumor	Yes	Yes	No	TCGA-DD-AAC9	425.45.0	Nationwide Children's Hospital	22	LIHC	000AA05C-2DBE-48F0-9D57-D8E21F6D34FD	12	TCGA	2016																			Mild	3.8	4.2	5.3	TCGA-DD-AAC9	AC6A1E0C-DBA0-4B21-B12B-A501ED796BEC	0.2	0.7	Not Available	A	0.7	1.5	1.3	28	-18911		0	347
TCGA-DD-AACA-01A-11R-A41C-07	Tumor	Yes	Yes	No	TCGA-DD-AACA	425.45.0	Nationwide Children's Hospital	22	LIHC	614951D2-47DF-4788-848C-B3A1A9B7EDC1	12	TCGA	2016																			Mild	3.8	3.7	5.3	TCGA-DD-AACA	D6486001-240A-455A-980C-E06C25C61FA5	0.2	0.7	Not Available	A	0.7	1.5	1.2	28	-23973		0	2000
TCGA-DD-AACA-02A-11R-A41C-07	Tumor	Yes	Yes	Yes	TCGA-DD-AACA	425.45.0	Nationwide Children's Hospital	22	LIHC	614951D2-47DF-4788-848C-B3A1A9B7EDC1	12	TCGA	2016																			Mild	3.8	3.7	5.3	TCGA-DD-AACA	D6486001-240A-455A-980C-E06C25C61FA5	0.2	0.7	Not Available	A	0.7	1.5	1.2	28	-23973		0	2000
TCGA-DD-AACA-02B-11R-A41C-07	Tumor	Yes	Yes	Yes	TCGA-DD-AACA	425.45.0	Nationwide Children's Hospital	22	LIHC	614951D2-47DF-4788-848C-B3A1A9B7EDC1	12	TCGA	2016																			Mild	3.8	3.7	5.3	TCGA-DD-AACA	D6486001-240A-455A-980C-E06C25C61FA5	0.2	0.7	Not Available	A	0.7	1.5	1.2	28	-23973		0	2000
TCGA-DD-AACB-01A-11R-A41C-07	Tumor	Yes	Yes	No	TCGA-DD-AACB	425.45.0	Nationwide Children's Hospital	22	LIHC	7BEA69C1-00E2-410C-ADD1-0A34518C5628	12	TCGA	2016																			Mild	3.8	4.1	5.3	TCGA-DD-AACB	6D2E8BC2-CA86-41C1-AE49-289E20FCE758	0.2	0.8	Not Available	A	0.7	1.5	1.1	28	-27103		0	1800
TCGA-DD-AACC-01A-11R-A41C-07	Tumor	Yes	Yes	No	TCGA-DD-AACC	425.45.0	Nationwide Children's Hospital	22	LIHC	EAA758BF-0121-48A9-837B-43F11827CCAA	12	TCGA	2016																			Mild	3.8	3.9	5.3	TCGA-DD-AACC	ED8C0D53-5DB0-4B77-95EC-15971926E313	0.2	0.5	Not Available	A	0.7	1.5	1.3	28	-22499	1685	0
TCGA-DD-AACD-01A-11R-A41C-07	Tumor	Yes	Yes	No	TCGA-DD-AACD	425.45.0	Nationwide Children's Hospital	22	LIHC	C2FC8AEB-8425-4403-B3BB-80624B55A066	12	TCGA	2016																			Mild	3.8	3.9	5.3	TCGA-DD-AACD	41FB30AA-63B4-4CC6-A275-B77048612FA0	0.2	0.3	3	A	0.7	1.5	1.0	28	-17828	381	0
TCGA-DD-AACE-01A-11R-A41C-07	Tumor	Yes	Yes	No	TCGA-DD-AACE	425.45.0	Nationwide Children's Hospital	22	LIHC	24159ACC-45AC-4E4A-A65A-D16434A30CBE	12	TCGA	2016																			Mild	3.8	4.4	5.3	TCGA-DD-AACE	ABBCF6BD-4683-45AC-947A-51AE6EF0A244	0.2	0.9	Not Available	A	0.7	1.5	1.2	28	-22727		0	1931
TCGA-DD-AACF-01A-11R-A41C-07	Tumor	Yes	Yes	No	TCGA-DD-AACF	425.45.0	Nationwide Children's Hospital	22	LIHC	04EDC25B-7D10-40B8-868C-942DCC4D55A3	12	TCGA	2016																			Mild	3.8	3.5	5.3	TCGA-DD-AACF	635AAD0B-9C47-4564-821F-C00DDB280D53	0.2	0.5	Not Available	A	0.7	1.5	1.1	28	-25172	365	0
TCGA-DD-AACG-01A-11R-A41C-07	Tumor	Yes	Yes	No	TCGA-DD-AACG	425.45.0	Nationwide Children's Hospital	22	LIHC	20A6D36B-8CE6-464C-9E8B-C1D501D771B4	12	TCGA	2016																			Mild	3.8	3.6	5.3	TCGA-DD-AACG	B5BEF77A-F46C-406C-9AA8-55F7A61AA885	0.2	1.0	Not Available	A	0.7	1.5	1.5	28	-19174	469	0
TCGA-DD-AACH-01A-11R-A41C-07	Tumor	Yes	Yes	No	TCGA-DD-AACH	425.45.0	Nationwide Children's Hospital	22	LIHC	54E2836E-44EF-447A-88D1-AB163FDC4443	12	TCGA	2016																			Mild	3.8	4.3	5.3	TCGA-DD-AACH	219B067C-522F-4971-B0D0-86F9971D369D	0.2	1.5	Not Available	A	0.7	15	1.2	28	-25544	195	0
TCGA-DD-AACI-01A-11R-A41C-07	Tumor	Yes	Yes	No	TCGA-DD-AACI	425.45.0	Nationwide Children's Hospital	22	LIHC	430FFBE0-EC41-4661-95EA-9705F69BC0E0	12	TCGA	2016																			Mild	3.8	3.6	5.3	TCGA-DD-AACI	E6FA354E-ADA7-41E0-8C8B-38520A5E6601	0.2	0.5	Not Available	A	0.7	1.5	1.0	28	-25236		0	1618
TCGA-DD-AACJ-01A-11R-A41C-07	Tumor	Yes	Yes	No	TCGA-DD-AACJ	425.45.0	Nationwide Children's Hospital	22	LIHC	DB9263F1-6A4E-4C79-A409-8406955DF512	12	TCGA	2016																			Not Available	3.8	3.6	5.3	TCGA-DD-AACJ	93AFBFA1-4D03-4105-8DDA-B095F0AB308A	0.2	1.0	Not Available	A	0.7	1.5	1.0	15	-27528		0	1828
TCGA-DD-AACK-01A-11R-A41C-07	Tumor	Yes	Yes	No	TCGA-DD-AACK	425.45.0	Nationwide Children's Hospital	22	LIHC	9D5F02DF-AC36-4D71-899F-CC298996A7AC	12	TCGA	2016																			None	3.8	4.6	5.3	TCGA-DD-AACK	D7CD045A-0BE2-4B6D-AEFD-5D75E57BC6F6	0.2	0.9	Not Available	A	0.7	1.5	1.3	15	-25796		0	9
TCGA-DD-AACL-01A-11R-A41C-07	Tumor	Yes	Yes	No	TCGA-DD-AACL	425.45.0	Nationwide Children's Hospital	22	LIHC	587A3FFE-14C2-4E02-B7F2-DF06F36DCF40	12	TCGA	2016																			Unknown	3.8	3.3	5.3	TCGA-DD-AACL	3DA3CFEC-5464-4DD8-9757-A0CDFE3536F8	0.2	0.7	Not Available	A	0.7	1.5	1.0	29	-24355		0	58
TCGA-DD-AACN-01A-11R-A41C-07	Tumor	Yes	Yes	No	TCGA-DD-AACN	425.45.0	Nationwide Children's Hospital	22	LIHC	74F5F3D2-D518-499D-BB3A-6FEBD30A60D1	12	TCGA	2016	NO						TCGA-DD-AACN-A66125	276C8689-15A0-4900-8451-29E56E7794D9	2	YES	379	Other	adriamycin	Chemoembolization	Other, specify	lipidol	10	2014	Unknown	3.8	3.9	5.3	TCGA-DD-AACN	0AFD4283-7311-4D69-A2F5-779628DA45FC	0.2	2.2	Not Available	A	0.7	1.5	1.5	29	-12007		0	1292
TCGA-DD-AACO-01A-11R-A41C-07	Tumor	Yes	Yes	No	TCGA-DD-AACO	425.45.0	Nationwide Children's Hospital	22	LIHC	92A1DA23-567F-4FAD-B147-289D3EC7F8E9	12	TCGA	2016																			Mild	3.8	3.7	5.3	TCGA-DD-AACO	34413807-07BE-4204-B095-5E1DD1ED87DC	0.2	0.6	Not Available	A	0.7	1.5	1.4	29	-14796		0	1485
TCGA-DD-AACP-01A-11R-A41C-07	Tumor	Yes	Yes	No	TCGA-DD-AACP	425.45.0	Nationwide Children's Hospital	22	LIHC	889E20C6-7CE0-4829-9558-B763D4749AED	12	TCGA	2016																			None	3.8	4.1	5.3	TCGA-DD-AACP	7AD77384-0946-4FB5-9B10-BDC8A5FC8D87	0.2	1.1	Not Available	A	0.7	1.5	1.1	29	-23728		0	400
TCGA-DD-AACQ-01A-11R-A41C-07	Tumor	Yes	Yes	No	TCGA-DD-AACQ	425.45.0	Nationwide Children's Hospital	22	LIHC	D05AFAC8-3EC5-4B46-B32B-B3C7258F8FD2	12	TCGA	2016																			Unknown	3.8	4.2	5.3	TCGA-DD-AACQ	0F34D654-8984-4B8B-B345-67066D611513	0.2	0.8	Not Available	A	0.7	1.5	1.3	29	-18429		0	429
TCGA-DD-AACS-01A-11R-A41C-07	Tumor	Yes	Yes	No	TCGA-DD-AACS	425.45.0	Nationwide Children's Hospital	22	LIHC	414751D9-BE58-47DB-8246-513978674AE5	12	TCGA	2016																			Unknown	3.8	4.3	5.3	TCGA-DD-AACS	82D6268A-DE59-4A14-ABD2-7492178FA5BD	0.2	1.0	Not Available	A	0.7	1.5	1.1	29	-14473		0	1475
TCGA-DD-AACT-01A-11R-A41C-07	Tumor	Yes	Yes	No	TCGA-DD-AACT	425.45.0	Nationwide Children's Hospital	22	LIHC	0570366A-1977-4F50-B4B8-D39333111F88	12	TCGA	2016																			Mild	3.8	4.4	5.3	TCGA-DD-AACT	3EA084C5-3783-4FDE-B341-5914D2EDB977	0.2	0.8	Not Available	A	0.7	1.5	0.7	29	-25292		0	1291
TCGA-DD-AACU-01A-11R-A41C-07	Tumor	Yes	Yes	No	TCGA-DD-AACU	425.45.0	Nationwide Children's Hospital	22	LIHC	8FE7949E-197E-44A7-AD54-F9587F2DC5A1	12	TCGA	2016																			Unknown	3.8	4.4	5.3	TCGA-DD-AACU	88B6181C-1086-42DF-8BB9-1069EC2DC675	0.2	0.3	Not Available	A	0.7	1.5	1.1	29	-21606		0	1240
TCGA-DD-AACV-01A-11R-A41C-07	Tumor	Yes	Yes	No	TCGA-DD-AACV	425.45.0	Nationwide Children's Hospital	22	LIHC	493E8DDA-EAFB-4BEA-81E2-E1119E908775	12	TCGA	2016	NO						TCGA-DD-AACV-A66126	78616A41-C91B-46B3-8DA4-1A7FD79F8516	2	YES	345;803;855;968	Other;Other;Other;Other	adriamycin;adriamycin;adriamycin;adriamycin	Chemoembolization;Chemoembolization;Chemoembolization;Chemoembolization	Other, specify;Other, specify;Other, specify;Other, specify	lipidol;lipidol;lipidol;lipidol	10	2014	Unknown	3.8	4.3	5.3	TCGA-DD-AACV	8E79EA29-787E-4A33-8465-9891776F47ED	0.2	0.6	Not Available	A	0.7	1.5	1.2	29	-19660		0	1210
TCGA-DD-AACW-01A-11R-A41C-07	Tumor	Yes	Yes	No	TCGA-DD-AACW	425.45.0	Nationwide Children's Hospital	22	LIHC	4DC47F53-C5DF-4D9C-868E-54C698BDD63C	12	TCGA	2016																			Unknown	3.8	4.0	5.3	TCGA-DD-AACW	67A00F5F-C753-48F9-BC24-8287F50EC776	0.2	0.6	Not Available	A	0.7	1.5	1.0	29	-15872		0	1157
TCGA-DD-AACX-01A-11R-A41C-07	Tumor	Yes	Yes	No	TCGA-DD-AACX	425.45.0	Nationwide Children's Hospital	22	LIHC	0F41CB17-D63D-4DEA-A5FF-A3729D9F6EF0	12	TCGA	2016																			Mild	3.8	4.2	5.3	TCGA-DD-AACX	431A72E1-EA03-4E40-89C4-2F02D454C897	0.2	0.5	Not Available	A	0.7	1.5	0.8	29	-24329		0	170
TCGA-DD-AACY-01A-11R-A41C-07	Tumor	Yes	Yes	No	TCGA-DD-AACY	425.45.0	Nationwide Children's Hospital	22	LIHC	EA147CE2-6887-4043-A410-7C983C229A2D	12	TCGA	2016	YES	Radiofrequency Ablation;Radiofrequency Ablation	Not Applicable;Not Applicable	845;1161	2;1	2;1	TCGA-DD-AACY-A66127	0745DCEF-5CAE-438E-8619-E0D0820BDD76	2	YES	407;Not Available	Other;Not Available	adriamycin;Not Applicable	Chemoembolization;Not Available	Other, specify;Not Available	lipidol;Not Applicable	10	2014	Mild	3.8	3.1	5.3	TCGA-DD-AACY	D884561B-5828-4C47-ACD7-3F02E181B596	0.2	1.3	Not Available	A	0.7	1.5	0.6	29	-22332		0	1140
TCGA-DD-AACZ-01A-11R-A41C-07	Tumor	Yes	Yes	No	TCGA-DD-AACZ	425.45.0	Nationwide Children's Hospital	22	LIHC	15003256-FC7C-4662-9889-8F6777362338	12	TCGA	2016																			Unknown	3.8	4.5	5.3	TCGA-DD-AACZ	CCE2BB32-84CB-4991-9628-1EA408A9B11A	0.2	0.4	Not Available	A	0.7	1.5	0.6	29	-23230	171	0
TCGA-DD-AAD0-01A-11R-A41C-07	Tumor	Yes	Yes	No	TCGA-DD-AAD0	425.45.0	Nationwide Children's Hospital	22	LIHC	B9824969-8ADC-4977-86A7-CD0CD9A2D850	12	TCGA	2016																			Mild	3.8	3.4	5.3	TCGA-DD-AAD0	09790A9B-CC2F-4D7E-A971-8FB4ECD9F791	0.2	0.8	Not Available	A	0.7	1.5	0.5	29	-26781		0	137
TCGA-DD-AAD1-01A-11R-A41C-07	Tumor	Yes	Yes	No	TCGA-DD-AAD1	425.45.0	Nationwide Children's Hospital	22	LIHC	EEE2CA84-0DF8-42D5-B5EF-B37496477DFC	12	TCGA	2016																			Unknown	3.8	4.5	5.3	TCGA-DD-AAD1	1F482810-433A-4D46-B81B-F7909FFF8C09	0.2	0.6	Not Available	A	0.7	1.5	0.5	29	-18794		0	564
TCGA-DD-AAD2-01A-11R-A41C-07	Tumor	Yes	Yes	No	TCGA-DD-AAD2	425.45.0	Nationwide Children's Hospital	22	LIHC	D5DEF02E-890F-4CF4-890A-ED204B3529D1	12	TCGA	2016																			Mild	3.8	3.5	5.3	TCGA-DD-AAD2	03F5DE7D-45A9-4A73-8C61-ED816D4A3AC5	0.2	0.3	Not Available	A	0.7	1.5	0.8	29	-24221		0	658
TCGA-DD-AAD3-01A-11R-A41C-07	Tumor	Yes	Yes	No	TCGA-DD-AAD3	425.45.0	Nationwide Children's Hospital	22	LIHC	D3E1C650-DA03-48B0-8E41-C10F6EA40B82	12	TCGA	2016																			Mild	3.8	3.9	5.3	TCGA-DD-AAD3	0D13229A-304A-48A6-A761-12E68E94A4B4	0.2	0.4	Not Available	A	0.7	1.5	0.8	29	-15706		0	1029
TCGA-DD-AAD5-01A-11R-A41C-07	Tumor	Yes	Yes	No	TCGA-DD-AAD5	425.45.0	Nationwide Children's Hospital	22	LIHC	57DD96F8-9AA0-48E4-96B0-5A929FE23143	12	TCGA	2016																			Mild	3.8	3.7	5.3	TCGA-DD-AAD5	6312D5B5-68AD-4D4F-A0A9-03D895AE30F9	0.2	0.6	Not Available	A	0.7	1.5	0.6	7	-19748		0	1037
TCGA-DD-AAD6-01A-11R-A41C-07	Tumor	Yes	Yes	No	TCGA-DD-AAD6	425.45.0	Nationwide Children's Hospital	22	LIHC	FCFC3801-0EB9-4E56-8707-FA1A8A63F286	12	TCGA	2016																			Unknown	3.8	2.7	5.3	TCGA-DD-AAD6	418E79D1-51C7-4CEF-A1B6-E291FB13C2A5	0.2	0.6	Not Available	A	0.7	1.5	1.1	7	-24185		0	672
TCGA-DD-AAD8-01A-11R-A41C-07	Tumor	Yes	Yes	No	TCGA-DD-AAD8	425.45.0	Nationwide Children's Hospital	22	LIHC	6E8E06E7-716F-4945-8C19-59E2FC91078E	12	TCGA	2016																			Mild	3.8	4.3	5.3	TCGA-DD-AAD8	24B66729-242B-4771-819D-77C9A1FCBB10	0.2	0.3	Not Available	A	0.7	1.5	0.6	7	-26781		0	959
TCGA-DD-AADA-01A-11R-A41C-07	Tumor	Yes	Yes	No	TCGA-DD-AADA	425.45.0	Nationwide Children's Hospital	22	LIHC	E16161EC-27D9-4BE5-A3D4-DC1B8F3CC9C1	12	TCGA	2016																			Unknown	3.8	4.1	5.3	TCGA-DD-AADA	E50EDBA1-8EC4-47E7-A01E-9F1B2CD75FD7	0.2	0.5	Not Available	A	0.7	1.5	0.6	7	-24288		0	930
TCGA-DD-AADB-01A-11R-A41C-07	Tumor	Yes	Yes	No	TCGA-DD-AADB	425.45.0	Nationwide Children's Hospital	22	LIHC	8A6FCCEE-DB19-4A57-858C-B8EDD107A799	12	TCGA	2016																			Unknown	3.8	4.5	5.3	TCGA-DD-AADB	5EAAF7AE-36AF-4FB4-8940-E0861983CEB0	0.2	1.5	Not Available	A	0.7	1.5	0.8	7	-18728		0	890
TCGA-DD-AADC-01A-11R-A41C-07	Tumor	Yes	Yes	No	TCGA-DD-AADC	425.45.0	Nationwide Children's Hospital	22	LIHC	1894833E-908A-4CD9-BE60-E92631991C0C	12	TCGA	2016																			Unknown	3.8	3.8	5.3	TCGA-DD-AADC	4100FD8B-CF37-4E63-A73D-95C9C392D606	0.2	0.7	Not Available	A	0.7	1.5	0.8	7	-19527	425	0
TCGA-DD-AADD-01A-11R-A41C-07	Tumor	Yes	Yes	No	TCGA-DD-AADD	425.45.0	Nationwide Children's Hospital	22	LIHC	E00C3569-ADE7-49F7-AB97-776FD66A8915	12	TCGA	2016																			Unknown	3.8	4.1	5.3	TCGA-DD-AADD	B44F664C-444C-4C64-A407-52FD9B55F178	0.2	0.4	Not Available	A	0.7	1.5	0.9	7	-18752		0	864
TCGA-DD-AADF-01A-11R-A41C-07	Tumor	Yes	Yes	No	TCGA-DD-AADF	425.45.0	Nationwide Children's Hospital	22	LIHC	CCF3D179-C5C1-4413-A8B6-63D80B7E9818	12	TCGA	2016																			Unknown	3.8	3.5	5.3	TCGA-DD-AADF	70BB26B8-B38B-4E79-90E7-033A38405B00	0.2	1.1	Not Available	A	0.7	1.5	0.6	7	-23614	115	0
TCGA-DD-AADG-01A-11R-A41C-07	Tumor	Yes	Yes	No	TCGA-DD-AADG	425.45.0	Nationwide Children's Hospital	22	LIHC	E979AF26-6F49-46AF-ACB1-527085EB95A7	12	TCGA	2016																			Mild	3.8	4.2	5.3	TCGA-DD-AADG	89D1261C-6D93-4298-A2AF-B5FF52BE0CB6	0.2	0.9	Not Available	A	0.7	1.5	1.0	7	-25887		0	808
TCGA-DD-AADI-01A-11R-A41C-07	Tumor	Yes	Yes	No	TCGA-DD-AADI	425.45.0	Nationwide Children's Hospital	22	LIHC	6503E826-C5C3-4ADE-8A79-95E63CA950C8	12	TCGA	2016																			Unknown	3.8	3.8	5.3	TCGA-DD-AADI	97472E71-66EB-434B-81B0-D727765F44CB	0.2	0.5	Not Available	A	0.7	1.5	0.8	7	-15928		0	763
TCGA-DD-AADJ-01A-11R-A41C-07	Tumor	Yes	Yes	No	TCGA-DD-AADJ	425.45.0	Nationwide Children's Hospital	22	LIHC	53292C52-EA90-4880-9CFE-6AB52A35BFA7	12	TCGA	2016																			Unknown	3.8	4.2	5.3	TCGA-DD-AADJ	1D880AEA-9EFE-4A43-8A6A-6A81801DA9E0	0.2	0.6	Not Available	A	0.7	1.5	0.6	7	-25863		0	730
TCGA-DD-AADK-01A-11R-A41C-07	Tumor	Yes	Yes	No	TCGA-DD-AADK	425.45.0	Nationwide Children's Hospital	22	LIHC	E794E64F-18CD-4848-B65E-B6B844205625	12	TCGA	2016																			None	3.8	4.4	5.3	TCGA-DD-AADK	40F30FFB-51DE-4786-A88F-16C170AAC207	0.2	0.5	Not Available	A	0.7	1.5	1.2	14	-25046		0	734
TCGA-DD-AADL-01A-11R-A41C-07	Tumor	Yes	Yes	No	TCGA-DD-AADL	425.45.0	Nationwide Children's Hospital	22	LIHC	5069A7B3-F8FB-493C-BD8E-19AB1A858DC0	12	TCGA	2016																			Unknown	3.8	3.5	5.3	TCGA-DD-AADL	A7F7E313-4636-4C54-B2B7-F5928A8368E4	0.2	0.5	2	A	0.7	1.5	0.5	7	-21512		0	636
TCGA-DD-AADM-01A-11R-A41C-07	Tumor	Yes	Yes	No	TCGA-DD-AADM	425.45.0	Nationwide Children's Hospital	22	LIHC	91B2D2E5-E134-4A6F-8FBA-70C6CDDD8EE5	12	TCGA	2016																			Unknown	3.8	4.1	5.3	TCGA-DD-AADM	62C02DA8-E4B4-4294-9923-8992D187FC7B	0.2	0.5	Not Available	A	0.7	1.5	0.8	7	-21349	12	0
TCGA-DD-AADN-01A-11R-A41C-07	Tumor	Yes	Yes	No	TCGA-DD-AADN	425.45.0	Nationwide Children's Hospital	22	LIHC	A77DA31C-4012-4F9C-816B-91F7ED6EDB97	12	TCGA	2016																			Unknown	3.8	3.5	5.3	TCGA-DD-AADN	32E39C1D-B8E8-4EFE-B451-8EFB112D3518	0.2	1.1	Not Available	A	0.7	1.5	0.8	7	-21632		0	527
TCGA-DD-AADO-01A-11R-A41C-07	Tumor	Yes	Yes	No	TCGA-DD-AADO	425.45.0	Nationwide Children's Hospital	22	LIHC	9353C815-E29C-4161-ABD1-9BC985C69CAA	12	TCGA	2016																			Unknown	3.8	4.5	5.3	TCGA-DD-AADO	9F056388-7529-4FD1-AF11-C82CC350F51C	0.2	0.4	Not Available	A	0.7	1.5	0.6	7	-20139		0	92
TCGA-DD-AADP-01A-11R-A39D-07	Tumor	Yes	Yes	No	TCGA-DD-AADP	405.45.0	Nationwide Children's Hospital	22	LIHC	49D2B82B-4C87-4191-B542-CB8FF9BE6B5B	12	TCGA	2016																			Unknown	3.8	3.7	5.3	TCGA-DD-AADP	96D42ECC-1157-453A-9661-9248DDF8F273	0.2	0.6	Not Available	A	0.7	1.5	0.5	7	-16760		0	120
TCGA-DD-AADQ-01A-11R-A41C-07	Tumor	Yes	Yes	No	TCGA-DD-AADQ	425.45.0	Nationwide Children's Hospital	22	LIHC	F28DAA3A-C3C4-4ED7-87D9-20BDACCC9C88	12	TCGA	2016																			Unknown	3.8	4.4	5.3	TCGA-DD-AADQ	485D283A-552C-485A-84FB-3ABDB98DC797	0.2	0.3	Not Available	A	0.7	1.5	0.7	7	-21756		0	161
TCGA-DD-AADR-01A-11R-A41C-07	Tumor	Yes	Yes	No	TCGA-DD-AADR	425.45.0	Nationwide Children's Hospital	22	LIHC	A7218276-D07D-485A-B188-E41A70CD3BBD	12	TCGA	2016																			Mild	3.8	4.4	5.3	TCGA-DD-AADR	899D8EA5-49DC-4970-8848-EA6EA088A272	0.2	0.9	Not Available	A	0.7	1.5	1.0	7	-21217		0	1742
TCGA-DD-AADS-01A-11R-A41C-07	Tumor	Yes	Yes	No	TCGA-DD-AADS	425.45.0	Nationwide Children's Hospital	22	LIHC	94A53463-E95C-44FD-B389-DEB3186C3477	12	TCGA	2016																			Unknown	3.8	3.7	5.3	TCGA-DD-AADS	460A3CBD-C63C-4E6F-B670-2619687AC5A0	0.2	0.7	1	A	0.7	1.5	0.9	7	-23227		0	216
TCGA-DD-AADU-01A-11R-A41C-07	Tumor	Yes	Yes	No	TCGA-DD-AADU	425.45.0	Nationwide Children's Hospital	22	LIHC	360A7DDD-720B-401C-86A3-088C055AB417	12	TCGA	2016																			None	3.8	4.3	5.3	TCGA-DD-AADU	CF358FB8-866C-4780-A550-D6C1C30B8C63	0.2	1.8	Not Available	A	0.7	1.5	0.8	14	-21940		0	252
TCGA-DD-AADV-01A-11R-A39D-07	Tumor	Yes	Yes	No	TCGA-DD-AADV	405.45.0	Nationwide Children's Hospital	22	LIHC	473A97D1-D855-48E1-9903-D569A4C9D695	12	TCGA	2016																			None	3.8	3.8	5.3	TCGA-DD-AADV	4C78B999-4797-4E19-8BC5-9FFD01CF768A	0.2	0.8	Not Available	A	0.7	1.5	0.9	14	-18300		0	230
TCGA-DD-AADW-01A-11R-A39D-07	Tumor	Yes	Yes	No	TCGA-DD-AADW	405.45.0	Nationwide Children's Hospital	22	LIHC	AF56212A-8134-4133-A3E0-D7032332D4F1	12	TCGA	2016																			None	3.8	4.3	4.3	TCGA-DD-AADW	1BCF1762-7926-45F6-A367-D45FC3AF7BC3	0.2	1.0	Not Available	A	0.7	1.5	0.8	14	-17781		0	203
TCGA-DD-AADY-01A-11R-A41C-07	Tumor	Yes	Yes	No	TCGA-DD-AADY	425.45.0	Nationwide Children's Hospital	22	LIHC	0021D0CE-DC52-44A8-8395-7C8DC49FC44E	12	TCGA	2016																			None	3.8	3.5	5.3	TCGA-DD-AADY	E42E4244-DCE8-453A-B5E0-7593A9B5AF61	0.2	0.8	Not Available	A	0.7	1.5	0.6	14	-20233		0	294
TCGA-DD-AAE0-01A-11R-A41C-07	Tumor	Yes	Yes	No	TCGA-DD-AAE0	425.45.0	Nationwide Children's Hospital	22	LIHC	BBFD0C0E-DB56-4D59-9837-907AF36FECF2	12	TCGA	2016																			Mild	3.8	4.8	5.3	TCGA-DD-AAE0	5E4136E4-DDD8-4FAF-8A8E-5F836FD97F49	0.2	0.9	Not Available	A	0.7	1.5	0.5	14	-16732		0	300
TCGA-DD-AAE1-01A-11R-A41C-07	Tumor	Yes	Yes	No	TCGA-DD-AAE1	425.45.0	Nationwide Children's Hospital	22	LIHC	6B12DA8F-5CEF-422F-A11A-035C5DE58DA3	12	TCGA	2016																			Mild	3.8	4.1	5.3	TCGA-DD-AAE1	3BBFF405-DAE4-4DC9-985A-33E7AC9CB2DD	0.2	0.4	Not Available	A	0.7	1.5	0.8	14	-19073		0	293
TCGA-DD-AAE2-01A-11R-A41C-07	Tumor	Yes	Yes	No	TCGA-DD-AAE2	425.45.0	Nationwide Children's Hospital	22	LIHC	92A66D5D-B8AF-4BEB-AA36-C14EA82B2D82	12	TCGA	2016																			None	3.8	4.4	5.3	TCGA-DD-AAE2	56447EB8-C50C-4E31-A29E-BDE6BFD31AF4	0.2	0.4	Not Available	A	0.7	1.5	0.8	14	-18695		0	288
TCGA-DD-AAE3-01A-11R-A41C-07	Tumor	Yes	Yes	No	TCGA-DD-AAE3	425.45.0	Nationwide Children's Hospital	22	LIHC	0546CCB0-BD9E-45D9-A79C-A49DEC0BDCF9	12	TCGA	2016																			None	3.8	4.7	5.3	TCGA-DD-AAE3	3C969BDF-CAE8-44F5-839F-5ABD4CBA0EC8	0.2	1.1	Not Available	A	0.7	1.5	0.8	14	-18271		0	300
TCGA-DD-AAE4-01A-11R-A41C-07	Tumor	Yes	Yes	No	TCGA-DD-AAE4	425.45.0	Nationwide Children's Hospital	22	LIHC	057F1A1D-152C-47B4-AC3E-7F88C5AB8598	12	TCGA	2016	YES	Radiofrequency Ablation	Not Applicable	139	1	Not Available	TCGA-DD-AAE4-A68415	26E1A96C-4564-4BFE-9354-F0AA2EB77E4F	3	NO	Not Available	Not Available	Not Applicable	Not Available	Not Available	Not Applicable	11	2014	None	3.8	4.0	5.3	TCGA-DD-AAE4	C797D6AD-05D4-4322-BAD2-29801A986B4E	0.2	0.8	Not Available	A	0.7	1.5	0.5	14	-18009		0	259
TCGA-DD-AAE6-01A-11R-A41C-07	Tumor	Yes	Yes	No	TCGA-DD-AAE6	425.45.0	Nationwide Children's Hospital	22	LIHC	9F320839-BD42-4DC8-ADB5-86038AF4E241	12	TCGA	2016																			None	3.8	4.4	5.3	TCGA-DD-AAE6	A61F823B-9164-4BD6-92F4-0A8D8FF0F55E	0.2	0.9	Not Available	A	0.7	1.5	0.8	14	-21764		0	141
TCGA-DD-AAE7-01A-11R-A41C-07	Tumor	Yes	Yes	No	TCGA-DD-AAE7	425.45.0	Nationwide Children's Hospital	22	LIHC	646C0EEB-6EAE-4E12-ABF4-275EC0ACFA14	12	TCGA	2016																			Severe	3.8	4.7	5.3	TCGA-DD-AAE7	427FDBF8-1603-466F-A5C6-963BB2EC3DAC	0.2	1.1	Not Available	A	0.7	1.5	0.9	14	-26568		0	382
TCGA-DD-AAE9-01A-11R-A41C-07	Tumor	Yes	Yes	No	TCGA-DD-AAE9	425.45.0	Nationwide Children's Hospital	22	LIHC	CC72DC40-3A90-41F8-9318-2835D5747D60	12	TCGA	2016																			Mild	3.8	4.1	5.3	TCGA-DD-AAE9	4C960EEE-E4B5-499D-A596-238AA78745A4	0.2	0.7	Not Available	A	0.7	1.5	0.9	14	-25451		0	386
TCGA-DD-AAEA-01A-11R-A41C-07	Tumor	Yes	Yes	No	TCGA-DD-AAEA	425.45.0	Nationwide Children's Hospital	22	LIHC	C91787BE-3D57-4B45-9260-DA4BAFEE14C7	12	TCGA	2016																			Unknown	3.8	4.5	5.3	TCGA-DD-AAEA	AD9657AA-34E9-48B1-BA63-916FE7BD14BB	0.2	0.6	Not Available	A	0.7	1.5	0.9	14	-24027		0	450
TCGA-DD-AAEB-01A-11R-A41C-07	Tumor	Yes	Yes	No	TCGA-DD-AAEB	425.45.0	Nationwide Children's Hospital	22	LIHC	F0B68004-B26C-459C-82FA-227F2652AFDE	12	TCGA	2016																			Unknown	3.8	4.1	5.3	TCGA-DD-AAEB	F0ECE8E2-A6B0-4ED9-A613-D2FBB20E51B1	0.2	0.3	Not Available	A	0.7	1.5	0.6	14	-22121		0	370
TCGA-DD-AAED-01A-12R-A41C-07	Tumor	Yes	Yes	No	TCGA-DD-AAED	425.45.0	Nationwide Children's Hospital	22	LIHC	C177A385-5776-4DC3-8829-07E2E4EB8E05	12	TCGA	2016	YES	Radiofrequency Ablation;Radiofrequency Ablation;Radiofrequency Ablation	Not Applicable;Not Applicable;Not Applicable	365;468;594	1;1;1	2;2;1	TCGA-DD-AAED-A68425	A79F710A-661B-4E19-BED7-1E5CA8496A81	3	YES	215;331;401	Other;Other;Other	adriamycin;adriamycin;adriamycin	Chemoembolization;Chemoembolization;Chemoembolization	Gelfoam;Gelfoam;Gelfoam	Not Applicable;Not Applicable;Not Applicable	11	2014	Mild	3.8	4.0	5.3	TCGA-DD-AAED	527D2BC3-7FDD-4B08-839D-67E2F246DB04	0.2	0.6	Not Available	A	0.7	1.5	0.5	15	-18722		0	470
TCGA-DD-AAEE-01A-11R-A41C-07	Tumor	Yes	Yes	No	TCGA-DD-AAEE	425.45.0	Nationwide Children's Hospital	22	LIHC	BECDCC68-C055-4918-A523-5AF95D09F6B1	12	TCGA	2016	NO						TCGA-DD-AAEE-A68428	824D8AAC-0C3D-40A8-8091-A0704D0DC6DC	3	YES	383;502;551	Other;Other;Other	adriamycin;adriamycin;adriamycin	Chemoembolization;Chemoembolization;Chemoembolization	Gelfoam;Gelfoam;Gelfoam	Not Applicable;Not Applicable;Not Applicable	11	2014	None	3.8	4.7	5.3	TCGA-DD-AAEE	3C51FEE0-DA54-40E9-A954-DFE30F6F075C	0.2	0.8	Not Available	A	0.7	1.5	0.9	18	-20396		0	498
TCGA-DD-AAEG-01A-11R-A39D-07	Tumor	Yes	Yes	No	TCGA-DD-AAEG	405.45.0	Nationwide Children's Hospital	22	LIHC	955D8FF4-E963-46E7-B9D6-B688D68370E5	12	TCGA	2016																			None	3.8	3.0	5.3	TCGA-DD-AAEG	BD627786-31A8-46D9-B3E2-7F489D50F608	0.2	0.6	Not Available	A	0.7	1.5	0.6	15	-21853		0	476
TCGA-DD-AAEH-01A-11R-A41C-07	Tumor	Yes	Yes	No	TCGA-DD-AAEH	425.45.0	Nationwide Children's Hospital	22	LIHC	E3CEE0D6-39DA-416D-B800-A0805D9BD7EA	12	TCGA	2016																			None	3.8	2.9	5.3	TCGA-DD-AAEH	FBB0E4BC-5398-4A7E-963C-86EA1108A2DE	0.2	0.9	Not Available	A	0.7	1.5	0.6	15	-26894		0	476
TCGA-DD-AAEI-01A-11R-A41C-07	Tumor	Yes	Yes	No	TCGA-DD-AAEI	425.45.0	Nationwide Children's Hospital	22	LIHC	332D86C4-0BBA-4C33-96E3-B81618159337	12	TCGA	2016	YES	Radiofrequency Ablation	Not Applicable	1352	1	1	TCGA-DD-AAEI-A66239	CA6D87A8-4CDC-47EC-80E3-E3F46B605C09	6	NO	Not Available	Not Available	Not Applicable	Not Available	Not Available	Not Applicable	10	2014	None	3.8	3.6	5.3	TCGA-DD-AAEI	34416BE6-B6D6-4029-B899-9BA685E39590	0.2	0.5	Not Available	A	0.7	1.5	0.9	15	-26465		0	1233
TCGA-DD-AAEK-01A-11R-A41C-07	Tumor	Yes	Yes	No	TCGA-DD-AAEK	425.45.0	Nationwide Children's Hospital	22	LIHC	08279826-A183-4A29-AA86-BC93502C648E	12	TCGA	2016																			None	3.8	4.1	5.3	TCGA-DD-AAEK	6EA0EF82-694D-492D-95DA-A3BC8DE99149	0.2	1.0	Not Available	A	0.7	1.5	0.7	15	-18757		0	1067
TCGA-DD-AAVP-01A-11R-A41C-07	Tumor	Yes	Yes	No	TCGA-DD-AAVP	425.45.0	Nationwide Children's Hospital	22	LIHC	0A411644-69AA-42C0-AEE2-A06F047D6461	12	TCGA	2016																			Severe	3.3	4.3	5.0	TCGA-DD-AAVP	0004D251-3F70-4395-B175-C94C2F5B1B81	0.2	1.1	1	A	0.7	1.4	1.2	13	-17833		0	2405
TCGA-DD-AAVQ-01A-11R-A41C-07	Tumor	Yes	Yes	No	TCGA-DD-AAVQ	425.45.0	Nationwide Children's Hospital	22	LIHC	E2460264-7F15-47D3-9149-86D927D8BB66	12	TCGA	2016																			Severe	3.3	3.0	5.2	TCGA-DD-AAVQ	80E7742F-ABBE-4F11-B4E4-C999DC1BD459	0.2	1.0	Not Available	A	0.7	1.4	1.1	13	-13911		0	2406
TCGA-DD-AAVR-01A-11R-A41C-07	Tumor	Yes	Yes	No	TCGA-DD-AAVR	425.45.0	Nationwide Children's Hospital	22	LIHC	99F22B1B-1131-4117-BE81-6859E48924ED	12	TCGA	2016																			None	3.3	3.6	5.2	TCGA-DD-AAVR	834CFF01-3C12-42FA-ABBE-AE0AE168C568	0.2	1.2	1	A	0.0	1.4	1.1	13	-16157		0	2198
TCGA-DD-AAVS-01A-11R-A41C-07	Tumor	Yes	Yes	No	TCGA-DD-AAVS	425.45.0	Nationwide Children's Hospital	22	LIHC	277EA594-546A-4646-962A-EF91E73B192D	12	TCGA	2016																			Mild	3.3	3.0	5.2	TCGA-DD-AAVS	9FC30C21-2C78-4843-A658-FE84A64B8FAD	0.2	1.0	Not Available	A	0	1.4	1.0	13	-20586		0	1823
TCGA-DD-AAVU-01A-11R-A41C-07	Tumor	Yes	Yes	No	TCGA-DD-AAVU	425.45.0	Nationwide Children's Hospital	22	LIHC	BE02C5A4-36E6-43C5-B93A-2B16AE75548F	12	TCGA	2016																			Mild	3.3	4.6	5.2	TCGA-DD-AAVU	146C5332-1AF5-4C49-B740-9A9EDC795F24	0.2	0.6	Not Available	A	0	1.4	1.2	13	-16889		0	1882
TCGA-DD-AAVV-01A-11R-A41C-07	Tumor	Yes	Yes	No	TCGA-DD-AAVV	425.45.0	Nationwide Children's Hospital	22	LIHC	A5AD3182-D0B0-4080-A680-D9734A2A0504	12	TCGA	2016																			Mild	3.3	4.6	5.2	TCGA-DD-AAVV	915F531B-8448-41C7-9DFB-9C83062B906E	0.2	0.9	Not Available	A	0	1.4	1.3	1	-20751		0	2455
TCGA-DD-AAVW-01A-11R-A41C-07	Tumor	Yes	Yes	No	TCGA-DD-AAVW	425.45.0	Nationwide Children's Hospital	22	LIHC	75D28777-4758-42F8-BED9-1CAEFC1717F5	12	TCGA	2016																			None	3.3	4.6	5.2	TCGA-DD-AAVW	11823A8A-194F-4E6B-A373-EF5A3FC7D2B9	0.2	1.4	Not Available	A	0.7	1.4	1.1	13	-12986		0	1867
TCGA-DD-AAVX-01A-11R-A41C-07	Tumor	Yes	Yes	No	TCGA-DD-AAVX	425.45.0	Nationwide Children's Hospital	22	LIHC	1DB44538-AFF6-4611-981B-3CFCEA8ED511	12	TCGA	2016																			Severe	3.3	3.9	5.2	TCGA-DD-AAVX	AFCB9708-92B3-4727-9C0D-63E7FF22D87B	0.2	1.1	2	A	0.7	1.4	1.0	13	-14016		0	1718
TCGA-DD-AAVY-01A-11R-A41C-07	Tumor	Yes	Yes	No	TCGA-DD-AAVY	425.45.0	Nationwide Children's Hospital	22	LIHC	C908180D-4F7D-46A0-BB64-B47077E24600	12	TCGA	2016																			None	3.3	3.0	5.2	TCGA-DD-AAVY	C36F9FFE-515B-4895-B82A-AADC49FE3016	0.2	1.0	2	A	0.7	1.4	1.2	13	-20709		0	1788
TCGA-DD-AAVZ-01A-11R-A41C-07	Tumor	Yes	Yes	No	TCGA-DD-AAVZ	425.45.0	Nationwide Children's Hospital	22	LIHC	A3717BE0-51B0-4C08-B402-F62C007DA1DF	12	TCGA	2016																			None	3.3	3.8	5.2	TCGA-DD-AAVZ	11F69D9F-A67D-41FA-95A9-BAA194B3FCFB	0.2	1.0	1	A	0.7	1.4	1.2	13	-14005		0	1699
TCGA-DD-AAW0-01A-11R-A41C-07	Tumor	Yes	Yes	No	TCGA-DD-AAW0	425.45.0	Nationwide Children's Hospital	22	LIHC	888A9741-FC40-4FA1-8792-32D4CD626C91	12	TCGA	2016																			Mild	3.3	4.6	5.2	TCGA-DD-AAW0	109436AA-A655-429B-8D3B-1A43385C9016	0.2	0.2	Not Available	A	0.7	1.4	1.3	13	-19981		0	1644
TCGA-DD-AAW1-01A-11R-A41C-07	Tumor	Yes	Yes	No	TCGA-DD-AAW1	425.45.0	Nationwide Children's Hospital	22	LIHC	09930767-9AE6-4582-A8A4-F0C5DE76E251	12	TCGA	2016																			Severe	3.3	4.0	5.3	TCGA-DD-AAW1	31C7D56B-4AF7-4FDB-BA83-63BF615FCC3D	0.2	0.7	Not Available	A	0.7	1.4	1.2	13	-20288		0	1644
TCGA-DD-AAW2-01A-11R-A41C-07	Tumor	Yes	Yes	No	TCGA-DD-AAW2	425.45.0	Nationwide Children's Hospital	22	LIHC	7B3BE33D-61F1-4E90-B996-DC0CB55931F7	12	TCGA	2016																			None	3.3	4.0	5.2	TCGA-DD-AAW2	03DF105E-A005-4577-BFDB-9644758D778E	0.2	0.4	1	A	0.7	1.4	1.1	13	-25420		0	1505
TCGA-DD-AAW3-01A-11R-A41C-07	Tumor	Yes	Yes	No	TCGA-DD-AAW3	425.45.0	Nationwide Children's Hospital	22	LIHC	B7B70B8E-7E66-4D10-80BF-55A3794F2518	12	TCGA	2016																			None	3.3	4.1	5.2	TCGA-DD-AAW3	564B4F4D-3C18-40D5-9D95-916774DF600C	0.2	0.6	1	Not Available	0.0	1.4	1.0	13	-25254		0	1451
TCGA-ED-A459-01A-11R-A266-07	Tumor	Yes	Yes	No	TCGA-ED-A459	275.62.0	Nationwide Children's Hospital	22	LIHC	3AD660A7-B604-4DDD-A478-9150C65E2F0B	12	TCGA	2016																			Not Available	3800	5200	5100	TCGA-ED-A459	56403463-1727-4C23-A709-DE5F168C4073	.3	1.4	Not Available	Unknown	.7	1.1	1.1	15	-17402		0	7
TCGA-ED-A4XI-01A-11R-A266-07	Tumor	Yes	Yes	No	TCGA-ED-A4XI	275.62.0	Nationwide Children's Hospital	22	LIHC	FE24509B-299C-440A-B3AE-0E08C9F63667	12	TCGA	2016																			None	3.8	2.9	5.1	TCGA-ED-A4XI	C52ABAC9-07DA-4B3D-BF8A-2161CACF9682	0.1	1.3	Not Available	Unknown	4.1	5.9	54	22	-21497		0	6
TCGA-ED-A5KG-01A-11R-A27V-07	Tumor	Yes	Yes	No	TCGA-ED-A5KG	287.61.0	Nationwide Children's Hospital	22	LIHC	E2B3BD31-AFFE-419F-B6A0-F5D52B457179	12	TCGA	2016																			Severe	3.8	6.0	5.1	TCGA-ED-A5KG	CEBDAFEE-8FFD-4EE2-8DD1-9225E06623C2	0.1	0.4	Not Available	Unknown	4.1	5.8	3.9	22	-22258		0	6
TCGA-ED-A627-01A-12R-A311-07	Tumor	Yes	Yes	No	TCGA-ED-A627	314.59.0	Nationwide Children's Hospital	22	LIHC	BFAF92C4-55D3-4C4F-B044-A95860B30117	12	TCGA	2016																			Unknown	Not Available	Not Available	Not Available	TCGA-ED-A627	A4AF0084-EDD4-4DCD-8975-4A59EE5DA64C	Not Available	Not Available	Not Available	Unknown	Not Available	Not Available	Not Available	28	-27303		0	0
TCGA-ED-A66X-01A-11R-A311-07	Tumor	Yes	Yes	No	TCGA-ED-A66X	314.59.0	Nationwide Children's Hospital	22	LIHC	1A71F43F-2DF2-4D1F-AAAC-EF8DE5B5857E	12	TCGA	2016																			Mild	3.8	4.7	5.1	TCGA-ED-A66X	B75CA9E4-A474-4960-9343-C8E9524CD096	0.1	9	Not Available	Unknown	4.1	5.6	4.5	3	-12947		0	6
TCGA-ED-A66Y-01A-11R-A311-07	Tumor	Yes	Yes	No	TCGA-ED-A66Y	314.59.0	Nationwide Children's Hospital	22	LIHC	2CEAB8E0-F5CA-45E0-9821-57E8C18373ED	12	TCGA	2016																			Mild	3.8	6	5.1	TCGA-ED-A66Y	34303CDD-C31C-4B95-9965-2A5513DC322D	0.1	1	Not Available	Unknown	4.1	5.9	4.4	3	-18797		0	7
TCGA-ED-A7PX-01A-51R-A352-07	Tumor	Yes	Yes	No	TCGA-ED-A7PX	365.54.0	Nationwide Children's Hospital	22	LIHC	4F560FA9-E039-40DB-9352-CA84A7756B53	12	TCGA	2016																			None	Not Available	Not Available	Not Available	TCGA-ED-A7PX	470D52B8-3D74-4789-B714-B9869A96657B	0.1	0.9	Not Available	Unknown	4.1	5.8	17.0	3	-17638		0	6
TCGA-ED-A7PY-01A-11R-A33R-07	Tumor	Yes	Yes	No	TCGA-ED-A7PY	345.53.0	Nationwide Children's Hospital	22	LIHC	53E478B5-85B3-4BDA-A965-A6388F3722FA	12	TCGA	2016	YES	Ethanol Injection;Ethanol Injection;Ethanol Injection	Not Applicable;Not Applicable;Not Applicable	20;53;82	Not Available;Not Available;Not Available	Not Available;Not Available;Not Available	TCGA-ED-A7PY-A64278	867D2F96-7949-4978-8BF0-0176298728EF	28	NO	Not Available;Not Available;Not Available	Not Available;Not Available;Not Available	Not Applicable;Not Applicable;Not Applicable	Not Available;Not Available;Not Available	Not Available;Not Available;Not Available	Not Applicable;Not Applicable;Not Applicable	8	2014	Mild	Not Available	Not Available	Not Available	TCGA-ED-A7PY	A396E048-5AA0-4D71-96BD-7F4FDF6934AA	0.1	0.6	Not Available	Unknown	4.0	5.8	3.9	7	-7556		0	6
TCGA-ED-A7PZ-01A-11R-A33R-07	Tumor	Yes	Yes	No	TCGA-ED-A7PZ	345.53.0	Nationwide Children's Hospital	22	LIHC	B2C46D3C-3F85-45F5-A5CB-641102C5452D	12	TCGA	2016																			Mild	3.8	4.2	5.1	TCGA-ED-A7PZ	87750E70-3AF7-452A-9AA5-375ACD3843EA	0.1	0.9	Not Available	Unknown	4.0	5.8	7.0	7	-22601		0	6
TCGA-ED-A7XO-01A-11R-A352-07	Tumor	Yes	Yes	No	TCGA-ED-A7XO	365.54.0	Nationwide Children's Hospital	22	LIHC	92471461-1B52-4A4A-A1B3-1DEA080E652A	12	TCGA	2016																			Mild	3.8	4.2	5.1	TCGA-ED-A7XO	20BB3855-66E2-46D4-B189-006B4B254C2E	0.1	0.6	Not Available	Unknown	4.1	5.9	4.9	5	-10828		0	6
TCGA-ED-A7XP-01A-11R-A352-07	Tumor	Yes	Yes	No	TCGA-ED-A7XP	365.54.0	Nationwide Children's Hospital	22	LIHC	FA24ABA4-E91E-4846-BFA3-9283A4510DA9	12	TCGA	2016	YES	Ethanol Injection	Not Applicable	193	3	Not Available	TCGA-ED-A7XP-A65356	DC5CC86A-6960-47BF-9A87-B47CD01EC180	22	NO	Not Available	Not Available	Not Applicable	Not Available	Not Available	Not Applicable	9	2014	Mild	3.8	6.9	5.1	TCGA-ED-A7XP	CCA827CA-0066-497D-83DC-477F3B08EA6D	0.1	0.1	Not Available	Unknown	4.1	5.9	4.8	5	-19504		0	6
TCGA-ED-A82E-01A-11R-A352-07	Tumor	Yes	Yes	No	TCGA-ED-A82E	365.54.0	Nationwide Children's Hospital	22	LIHC	51409D85-467A-45C7-8C8E-2AACB4533667	12	TCGA	2016																			Mild	3.8	4.3	5.1	TCGA-ED-A82E	A96B67BA-6180-4B80-8792-877860421CA0	0.1	0.4	Not Available	Unknown	4.1	5.8	2.8	7	-22234		0	6
TCGA-ED-A8O5-01A-11R-A36F-07	Tumor	Yes	Yes	No	TCGA-ED-A8O5	377.51.0	Nationwide Children's Hospital	22	LIHC	346D061C-8991-4576-9309-5C9676A5C5D0	12	TCGA	2016																			Mild	3.8	4.2	5.1	TCGA-ED-A8O5	2BEA076B-C923-4A91-A37B-C6615FEC021C	0.1	0.4	Not Available	Unknown	4.1	5.8	3.4	12	-21648		0	6
TCGA-ED-A8O6-01A-11R-A36F-07	Tumor	Yes	Yes	No	TCGA-ED-A8O6	377.51.0	Nationwide Children's Hospital	22	LIHC	AF052B97-F903-45D8-943F-AC56C6093E1A	12	TCGA	2016																			Mild	3.8	2.8	5.1	TCGA-ED-A8O6	7FB03840-5153-4DC6-A302-5A89AA4E1FB6	0.1	2.3	Not Available	Unknown	4.1	5.8	2.8	12	-18572		0	6
TCGA-ED-A97K-01A-21R-A38B-07	Tumor	Yes	Yes	No	TCGA-ED-A97K	399.48.0	Nationwide Children's Hospital	22	LIHC	AB426654-2099-411A-AA6A-2DBCAA986530	12	TCGA	2016																			Mild	3.8	8	5.1	TCGA-ED-A97K	8778DC9E-A7DB-4464-A8AF-11ADDB5E441A	0.1	1.0	Not Available	Unknown	4.0	5.8	4.6	18	-20073		0	6
TCGA-EP-A12J-01A-11R-A131-07	Tumor	Yes	Yes	No	TCGA-EP-A12J	100.78.0	Nationwide Children's Hospital	22	LIHC	4D585C54-38CA-4B9F-AC25-07B7FCBF2391	12	TCGA	2016																			Not Available	3.8	4.2	5.1	TCGA-EP-A12J	959918d7-cb84-4745-a72f-d138176b1ecb	0.2	0.4	1	B	0.7	1.3	0.8	31	-22997		0	129
TCGA-EP-A12J-11A-11R-A131-07	Normal	Yes	Yes	No	TCGA-EP-A12J	100.78.0	Nationwide Children's Hospital	22	LIHC	4D585C54-38CA-4B9F-AC25-07B7FCBF2391	12	TCGA	2016																			Not Available	3.8	4.2	5.1	TCGA-EP-A12J	959918d7-cb84-4745-a72f-d138176b1ecb	0.2	0.4	1	B	0.7	1.3	0.8	31	-22997		0	129
TCGA-EP-A26S-01A-11R-A16W-07	Tumor	Yes	Yes	No	TCGA-EP-A26S	153.74.0	Nationwide Children's Hospital	22	LIHC	5FF3425D-E5B9-47AB-8530-06CBE45AF614	12	TCGA	2016																			Mild	3.8	3.5	5.1	TCGA-EP-A26S	B7D6621C-8BCE-4A01-8588-9D7761D9372B	0.2	0.4	Not Available	Not Available	Not Available	Not Available	Not Available	19	-25677		0	111
TCGA-EP-A26S-11A-12R-A16W-07	Normal	Yes	Yes	No	TCGA-EP-A26S	153.74.0	Nationwide Children's Hospital	22	LIHC	5FF3425D-E5B9-47AB-8530-06CBE45AF614	12	TCGA	2016																			Mild	3.8	3.5	5.1	TCGA-EP-A26S	B7D6621C-8BCE-4A01-8588-9D7761D9372B	0.2	0.4	Not Available	Not Available	Not Available	Not Available	Not Available	19	-25677		0	111
TCGA-EP-A2KA-01A-11R-A180-07	Tumor	Yes	Yes	No	TCGA-EP-A2KA	173.73.0	Nationwide Children's Hospital	22	LIHC	20731EE1-CC15-4F3E-8D83-125C9FAE55C7	12	TCGA	2016																			Not Available	Not Available	Not Available	Not Available	TCGA-EP-A2KA	440375D7-CDCD-418A-8992-0A8CA42D290D	Not Available	Not Available	2	Not Available	Not Available	1.0	0.7	18	-19214		0	111
TCGA-EP-A2KB-01A-11R-A180-07	Tumor	Yes	Yes	No	TCGA-EP-A2KB	173.73.0	Nationwide Children's Hospital	22	LIHC	47597D04-2B5E-48B4-93F8-359062F4C1B1	12	TCGA	2016	NO						TCGA-EP-A2KB-A33377	950DA764-8CFA-48C1-8ADC-A39018424BE9	28	YES	334	Doxorubicin	Not Applicable	Chemoembolization	Other, specify	Micron Microspheres	6	2012	Not Available	3.8	3.8	5.1	TCGA-EP-A2KB	18C08546-BED3-4ED9-B223-479AFE633C8E	0.2	1.4	Not Available	A	Not Available	1.0	Not Available	26	-16835		0	60
TCGA-EP-A2KC-01A-11R-A213-07	Tumor	Yes	Yes	No	TCGA-EP-A2KC	203.73.0	Nationwide Children's Hospital	22	LIHC	45C62222-B179-4F95-A48E-95AF849B2D70	12	TCGA	2016																			Not Available	3.6	3.1	4.8	TCGA-EP-A2KC	71681DB9-FA90-4FE1-A497-67D501EB75F0	Not Available	Not Available	Not Available	A	Not Available	Not Available	Not Available	5	-22677	19	0
TCGA-EP-A3JL-01A-11R-A213-07	Tumor	Yes	Yes	No	TCGA-EP-A3JL	203.73.0	Nationwide Children's Hospital	22	LIHC	5AE5BA53-89FB-42E3-BB80-6D769CCA75AF	12	TCGA	2016																			Not Available	3.2	4.1	4.8	TCGA-EP-A3JL	A196A937-B17D-4D4A-965B-8AF0F4F41367	0	0.6	Not Available	A	0.60	1.10	Not Available	19	-27886		0	97
TCGA-EP-A3RK-01A-11R-A22L-07	Tumor	Yes	Yes	No	TCGA-EP-A3RK	231.65.0	Nationwide Children's Hospital	22	LIHC	AF69F21B-BCFB-46E8-86C6-D36ADEE047CB	12	TCGA	2016																			Not Available	3.5	4.3	4.8	TCGA-EP-A3RK	F15279DD-5D12-460B-9BD1-B4F95681CA65	0.0	0.6	Not Available	A	Not Available	Not Available	Not Available	15	-26985		0	13
TCGA-EP-A3RK-11A-11R-A22L-07	Normal	Yes	Yes	No	TCGA-EP-A3RK	231.65.0	Nationwide Children's Hospital	22	LIHC	AF69F21B-BCFB-46E8-86C6-D36ADEE047CB	12	TCGA	2016																			Not Available	3.5	4.3	4.8	TCGA-EP-A3RK	F15279DD-5D12-460B-9BD1-B4F95681CA65	0.0	0.6	Not Available	A	Not Available	Not Available	Not Available	15	-26985		0	13
TCGA-ES-A2HS-01A-11R-A180-07	Tumor	Yes	Yes	No	TCGA-ES-A2HS	173.73.0	Nationwide Children's Hospital	22	LIHC	750EEC6B-D156-4142-981F-CA9694869399	12	TCGA	2016																			Mild	3.5	3.8	5.0	TCGA-ES-A2HS	728AEDB3-551A-4C16-9BE3-7733A9539E9E	0	1.9	0	A	0.8	1.2	0.6	28	-29268	688	0
TCGA-ES-A2HT-01A-12R-A180-07	Tumor	Yes	Yes	No	TCGA-ES-A2HT	173.73.0	Nationwide Children's Hospital	22	LIHC	A16A9CFB-2A9E-4D30-BA94-4F5333B5DC02	12	TCGA	2016																			Mild	3.5	4.1	5.0	TCGA-ES-A2HT	7DD3BDA9-3A0A-46FA-B052-A6D24B847804	0	0.6	0	A	0.8	1.2	0.7	30	-20023	438	0
TCGA-ES-A2HT-11A-11R-A180-07	Normal	Yes	Yes	No	TCGA-ES-A2HT	173.73.0	Nationwide Children's Hospital	22	LIHC	A16A9CFB-2A9E-4D30-BA94-4F5333B5DC02	12	TCGA	2016																			Mild	3.5	4.1	5.0	TCGA-ES-A2HT	7DD3BDA9-3A0A-46FA-B052-A6D24B847804	0	0.6	0	A	0.8	1.2	0.7	30	-20023	438	0
TCGA-FV-A23B-01A-11R-A16W-07	Tumor	Yes	Yes	No	TCGA-FV-A23B	153.74.0	Nationwide Children's Hospital	22	LIHC	7723FB6E-145D-4E56-8544-C076A3266C42	12	TCGA	2016	YES	Radiofrequency Ablation	Not Applicable	1501	1	4	TCGA-FV-A23B-A56106	90DB9C36-2FC9-4029-B149-5FB11F680DB6	28	NO	Not Available	Not Available	Not Applicable	Not Available	Not Available	Not Applicable	1	2014	Not Available	Not Available	Not Available	Not Available	TCGA-FV-A23B	C95ED407-BCC2-44AA-BC59-BF7549F2D665	Not Available	Not Available	Not Available	Not Available	Not Available	Not Available	Not Available	18	-25788		0	987
TCGA-FV-A23B-11A-11R-A16W-07	Normal	Yes	Yes	No	TCGA-FV-A23B	153.74.0	Nationwide Children's Hospital	22	LIHC	7723FB6E-145D-4E56-8544-C076A3266C42	12	TCGA	2016	YES	Radiofrequency Ablation	Not Applicable	1501	1	4	TCGA-FV-A23B-A56106	90DB9C36-2FC9-4029-B149-5FB11F680DB6	28	NO	Not Available	Not Available	Not Applicable	Not Available	Not Available	Not Applicable	1	2014	Not Available	Not Available	Not Available	Not Available	TCGA-FV-A23B	C95ED407-BCC2-44AA-BC59-BF7549F2D665	Not Available	Not Available	Not Available	Not Available	Not Available	Not Available	Not Available	18	-25788		0	987
TCGA-FV-A2QQ-01A-11R-A22L-07	Tumor	Yes	Yes	No	TCGA-FV-A2QQ	231.65.0	Nationwide Children's Hospital	22	LIHC	453EF2A2-D343-487D-ADB9-95DF967298BE	12	TCGA	2016																			Not Available	Not Available	Not Available	Not Available	TCGA-FV-A2QQ	D680DF09-368E-42B5-B540-45C41ED31042	Not Available	Not Available	Not Available	Unknown	Not Available	Not Available	Not Available	1	-29354		0	0
TCGA-FV-A2QR-01A-11R-A213-07	Tumor	Yes	Yes	No	TCGA-FV-A2QR	203.73.0	Nationwide Children's Hospital	22	LIHC	6012DDFF-3200-473A-BD7B-3C47D8A90D59	12	TCGA	2016																			Not Available	Not Available	Not Available	Not Available	TCGA-FV-A2QR	D3A03F7A-3482-4548-957E-05C692B20101	Not Available	Not Available	1	Not Available	Not Available	Not Available	Not Available	9	Not Available	581	0
TCGA-FV-A2QR-11A-11R-A213-07	Normal	Yes	Yes	No	TCGA-FV-A2QR	203.73.0	Nationwide Children's Hospital	22	LIHC	6012DDFF-3200-473A-BD7B-3C47D8A90D59	12	TCGA	2016																			Not Available	Not Available	Not Available	Not Available	TCGA-FV-A2QR	D3A03F7A-3482-4548-957E-05C692B20101	Not Available	Not Available	1	Not Available	Not Available	Not Available	Not Available	9	Not Available	581	0
TCGA-FV-A3I0-01A-11R-A22L-07	Tumor	Yes	Yes	No	TCGA-FV-A3I0	231.65.0	Nationwide Children's Hospital	22	LIHC	B035D1CD-2E10-47C0-A04D-B374A4162723	12	TCGA	2016																			Not Available	Not Available	4.40	Not Available	TCGA-FV-A3I0	A8C2AA08-9156-4845-AD77-5E060858C757	Not Available	0.4	Not Available	Not Available	Not Available	Not Available	Not Available	16	-28101		0	6
TCGA-FV-A3I0-11A-11R-A22L-07	Normal	Yes	Yes	No	TCGA-FV-A3I0	231.65.0	Nationwide Children's Hospital	22	LIHC	B035D1CD-2E10-47C0-A04D-B374A4162723	12	TCGA	2016																			Not Available	Not Available	4.40	Not Available	TCGA-FV-A3I0	A8C2AA08-9156-4845-AD77-5E060858C757	Not Available	0.4	Not Available	Not Available	Not Available	Not Available	Not Available	16	-28101		0	6
TCGA-FV-A3I1-01A-11R-A22L-07	Tumor	Yes	Yes	No	TCGA-FV-A3I1	231.65.0	Nationwide Children's Hospital	22	LIHC	88C82879-2810-4F4E-AA6E-3ABDB2A34D22	12	TCGA	2016																			Not Available	Not Available	Not Available	Not Available	TCGA-FV-A3I1	BFD20D71-18A5-4F01-8D56-84378AD92359	Not Available	Not Available	Not Available	Not Available	Not Available	Not Available	Not Available	16	Not Available		0	0
TCGA-FV-A3I1-11A-11R-A22L-07	Normal	Yes	Yes	No	TCGA-FV-A3I1	231.65.0	Nationwide Children's Hospital	22	LIHC	88C82879-2810-4F4E-AA6E-3ABDB2A34D22	12	TCGA	2016																			Not Available	Not Available	Not Available	Not Available	TCGA-FV-A3I1	BFD20D71-18A5-4F01-8D56-84378AD92359	Not Available	Not Available	Not Available	Not Available	Not Available	Not Available	Not Available	16	Not Available		0	0
TCGA-FV-A3R2-01A-11R-A22L-07	Tumor	Yes	Yes	No	TCGA-FV-A3R2	231.65.0	Nationwide Children's Hospital	22	LIHC	5EF48FA1-DBFC-4ABE-92D2-611F71967966	12	TCGA	2016																			Not Available	Not Available	Not Available	Not Available	TCGA-FV-A3R2	17833039-0D7E-47F0-90E6-8CABAE94C124	Not Available	Not Available	4	Not Available	Not Available	Not Available	Not Available	24	-27530	194	0
TCGA-FV-A3R2-11A-11R-A22L-07	Normal	Yes	Yes	No	TCGA-FV-A3R2	231.65.0	Nationwide Children's Hospital	22	LIHC	5EF48FA1-DBFC-4ABE-92D2-611F71967966	12	TCGA	2016																			Not Available	Not Available	Not Available	Not Available	TCGA-FV-A3R2	17833039-0D7E-47F0-90E6-8CABAE94C124	Not Available	Not Available	4	Not Available	Not Available	Not Available	Not Available	24	-27530	194	0
TCGA-FV-A3R3-01A-11R-A22L-07	Tumor	Yes	Yes	No	TCGA-FV-A3R3	231.65.0	Nationwide Children's Hospital	22	LIHC	90618806-DABB-404A-A64E-3C1A1952028F	12	TCGA	2016																			Not Available	3.4	2.0	5.0	TCGA-FV-A3R3	3DD7C93D-8194-44EE-8014-10DD81EF6441	0.0	0.4	Not Available	Not Available	0.6	1.3	1.3	25	-14231		0	4
TCGA-FV-A495-01A-11R-A266-07	Tumor	Yes	Yes	No	TCGA-FV-A495	275.62.0	Nationwide Children's Hospital	22	LIHC	A84DB62A-5903-4D77-ACBC-D34A4D7036DA	12	TCGA	2016																			Mild	3.8	4.0	5.0	TCGA-FV-A495	BD48FA5E-0152-46F0-A4FA-8CF723FF2DCD	0.3	1.0	1	Unknown	0.6	1.1	1.0	21	-18740		0	1
TCGA-FV-A496-01A-11R-A266-07	Tumor	Yes	Yes	No	TCGA-FV-A496	275.62.0	Nationwide Children's Hospital	22	LIHC	929083AF-D22B-459B-A27E-5A770C331194	12	TCGA	2016																			None	3.8	2.8	5.0	TCGA-FV-A496	8AFA3140-DCBD-44C0-AB13-4ADA6A0444D4	0.3	0.9	3	Unknown	0.9	1.1	1.0	21	-30950		0	10
TCGA-FV-A4ZP-01A-12R-A266-07	Tumor	Yes	Yes	No	TCGA-FV-A4ZP	275.62.0	Nationwide Children's Hospital	22	LIHC	A0CED448-FF96-4EE6-A7B1-42BEC226FF59	12	TCGA	2016																			Unknown	Not Available	Not Available	Not Available	TCGA-FV-A4ZP	5C08008D-5ED4-4480-BD00-C8A2D8C787DC	Not Available	Not Available	Not Available	Unknown	Not Available	Not Available	Not Available	15	-28771		0	1836
TCGA-FV-A4ZQ-01A-11R-A266-07	Tumor	Yes	Yes	No	TCGA-FV-A4ZQ	275.62.0	Nationwide Children's Hospital	22	LIHC	E939AF18-CF1C-4D9E-9EE5-FE4FF6B0F0FD	12	TCGA	2016																			Unknown	3.8	2.4	5.0	TCGA-FV-A4ZQ	65E430E1-0C9A-4045-83A9-653B7CFF811D	0.2	1.8	Not Available	Unknown	0.7	1.0	1.0	15	-19090		0	12
TCGA-G3-A25S-01A-11R-A16W-07	Tumor	Yes	Yes	No	TCGA-G3-A25S	153.74.0	Nationwide Children's Hospital	22	LIHC	D871019A-54B2-490B-8273-6F849A9CE2DB	12	TCGA	2016																			Mild	0.3	0.4	0.5	TCGA-G3-A25S	B865DEC4-F051-4FBE-9405-F832FF2010D7	0	1.2	0	A	0.6	1.4	1.0	27	-23571		0	37
TCGA-G3-A25T-01A-11R-A16W-07	Tumor	Yes	Yes	No	TCGA-G3-A25T	153.74.0	Nationwide Children's Hospital	22	LIHC	9E39BD69-E444-4A08-95CE-93D63A0E72AD	12	TCGA	2016																			None	0.3	0.4	0.5	TCGA-G3-A25T	F6E5979D-D6A9-4408-BD1B-1B37D1064E83	0	2.0	Not Available	A	0.4	1.4	0.7	27	-16461		0	1175
TCGA-G3-A25U-01A-11R-A16W-07	Tumor	Yes	Yes	No	TCGA-G3-A25U	153.74.0	Nationwide Children's Hospital	22	LIHC	57871F9C-29EE-4D2A-A6CA-2890A9D5237E	12	TCGA	2016																			Mild	0.3	0.3	0.5	TCGA-G3-A25U	B9835DC5-BF31-4541-A973-E8CA802D80BA	0	0.3	Not Available	A	0.4	1.1	0.5	27	-23207		0	1231
TCGA-G3-A25V-01A-11R-A16W-07	Tumor	Yes	Yes	No	TCGA-G3-A25V	153.74.0	Nationwide Children's Hospital	22	LIHC	AEE91538-916A-48C4-81F6-6F49330A230D	12	TCGA	2016	YES	Radiofrequency Ablation	Not Applicable	770	1	1	TCGA-G3-A25V-A40090	0E4F99EC-723C-4BA0-A89F-2C181F9054EE	12	NO	Not Available	Not Available	Not Applicable	Not Available	Not Available	Not Applicable	2	2013	None	0.3	0.4	0.5	TCGA-G3-A25V	F435EC00-0DB8-46B4-96BF-890A9D931DF3	0	0.6	0	A	0.6	1.4	0.7	27	-25144		0	69
TCGA-G3-A25X-01A-11R-A16W-07	Tumor	Yes	Yes	No	TCGA-G3-A25X	153.74.0	Nationwide Children's Hospital	22	LIHC	DCFA3A6F-3221-493D-AEC9-C69E30CE6FA7	12	TCGA	2016																			Mild	0.3	0.4	0.5	TCGA-G3-A25X	08428220-ABD4-484E-85CA-3673454C837E	0.0	1.1	Not Available	A	0.4	1.4	0.8	27	-26988		0	1359
TCGA-G3-A25Y-01A-11R-A16W-07	Tumor	Yes	Yes	No	TCGA-G3-A25Y	153.74.0	Nationwide Children's Hospital	22	LIHC	1DA08394-C3F2-4009-A149-21E88D3951BB	12	TCGA	2016																			Mild	0.3	0.4	0.5	TCGA-G3-A25Y	239B4298-B090-480A-A19F-9758A827AA30	0.0	0.7	Not Available	A	0.4	1.1	0.6	27	-19055	452	0
TCGA-G3-A25Z-01A-11R-A16W-07	Tumor	Yes	Yes	No	TCGA-G3-A25Z	153.74.0	Nationwide Children's Hospital	22	LIHC	4FF9D1EA-5ACE-4B37-B631-C2C745885ECC	12	TCGA	2016																			Mild	0.3	0.4	0.5	TCGA-G3-A25Z	2F3D22AD-6917-4189-89D9-2A06C2D2DE0A	0	0.9	1	A	0.6	1.4	1.1	27	-21509		0	269
TCGA-G3-A3CG-01A-11R-A213-07	Tumor	Yes	Yes	No	TCGA-G3-A3CG	203.73.0	Nationwide Children's Hospital	22	LIHC	1E01D599-43BE-4588-B9B7-05BC4AB35E96	12	TCGA	2016																			Severe	0.3	0.4	0.5	TCGA-G3-A3CG	8A14D153-BBF7-4512-A067-976EDFB65F91	0.3	0.3	Not Available	A	0.6	1.4	0.9	27	-29432		0	254
TCGA-G3-A3CH-01A-11R-A22L-07	Tumor	Yes	Yes	No	TCGA-G3-A3CH	231.65.0	Nationwide Children's Hospital	22	LIHC	36CDA441-B365-4F6C-9B4F-80726AFF986B	12	TCGA	2016																			Severe	0.3	0.3	0.5	TCGA-G3-A3CH	3A2D7482-C246-411E-841F-71D96E353328	0	0.7	Not Available	A	0.6	1.4	0.9	11	-19473		0	193
TCGA-G3-A3CH-11A-11R-A22L-07	Normal	Yes	Yes	No	TCGA-G3-A3CH	231.65.0	Nationwide Children's Hospital	22	LIHC	36CDA441-B365-4F6C-9B4F-80726AFF986B	12	TCGA	2016																			Severe	0.3	0.3	0.5	TCGA-G3-A3CH	3A2D7482-C246-411E-841F-71D96E353328	0	0.7	Not Available	A	0.6	1.4	0.9	11	-19473		0	193
TCGA-G3-A3CI-01A-11R-A213-07	Tumor	Yes	Yes	No	TCGA-G3-A3CI	203.73.0	Nationwide Children's Hospital	22	LIHC	13BD28C2-4A58-4A3E-B642-1807D2A4ADD9	12	TCGA	2016																			Mild	0.3	0.4	0.5	TCGA-G3-A3CI	B5465221-78FE-40A8-ABEC-BED600602DD4	0	0.3	Not Available	A	0.6	1.4	0.9	16	-26224		0	180
TCGA-G3-A3CJ-01A-11R-A213-07	Tumor	Yes	Yes	No	TCGA-G3-A3CJ	203.73.0	Nationwide Children's Hospital	22	LIHC	801473E2-D72B-4D8B-9408-7E2F1D374BBF	12	TCGA	2016																			Severe	0.3	0.4	0.5	TCGA-G3-A3CJ	CB8F3C76-DA86-4A1D-977C-44AB399B342A	0	1.0	Not Available	A	0.5	1.4	0.8	17	-19305		0	136
TCGA-G3-A3CK-01A-11R-A213-07	Tumor	Yes	Yes	No	TCGA-G3-A3CK	203.73.0	Nationwide Children's Hospital	22	LIHC	27C6B94C-EF6E-4E22-B88B-43BA3AC2E2DB	12	TCGA	2016																			Mild	0.3	0.2	0.5	TCGA-G3-A3CK	39EB1DB0-2722-4AF4-8254-D0E10256C64D	0	0.8	1	A	0.6	1.4	1.1	16	-22462		0	27
TCGA-G3-A5SI-01A-31R-A27V-07	Tumor	Yes	Yes	No	TCGA-G3-A5SI	287.61.0	Nationwide Children's Hospital	22	LIHC	1F154FC1-8456-49F3-ADD7-5117821325C5	12	TCGA	2016	NO						TCGA-G3-A5SI-A42749	79DD2140-0ABD-4E38-86EB-5D34A1015117	30	YES	370;435;447	Doxorubicin;Doxorubicin;Doxorubicin	Not Applicable;Not Applicable;Not Applicable	Chemoembolization;Chemoembolization;Chemoembolization	Plastic Beads;Plastic Beads;Plastic Beads	Not Applicable;Not Applicable;Not Applicable	4	2013	Mild	3.3	2.8	4.8	TCGA-G3-A5SI	14201DA5-4446-47BE-AF72-120B7780C6BF	0	0.7	Not Available	A	0.6	1.4	0.4	15	-16126		0	447
TCGA-G3-A5SJ-01A-11R-A27V-07	Tumor	Yes	Yes	No	TCGA-G3-A5SJ	287.61.0	Nationwide Children's Hospital	22	LIHC	CE69887F-A329-4BAD-9D23-6AFA9F296A08	12	TCGA	2016	YES	Radiofrequency Ablation	Not Applicable	364	1	1	TCGA-G3-A5SJ-A42748	743F0876-028E-4792-9D8B-F8673D375F17	30	NO	Not Available	Not Available	Not Applicable	Not Available	Not Available	Not Applicable	4	2013	Mild	3.3	4.1	4.8	TCGA-G3-A5SJ	2C8A1E74-33DE-453F-8D1E-E226185E52FC	0	0.5	Not Available	B	0.6	1.4	1.3	15	-21848		0	364
TCGA-G3-A5SK-01A-11R-A27V-07	Tumor	Yes	Yes	No	TCGA-G3-A5SK	287.61.0	Nationwide Children's Hospital	22	LIHC	143F3742-2DB5-4E51-8B94-F7D9CC3E1DAC	12	TCGA	2016	YES	Radiofrequency Ablation	Not Applicable	575	1	1	TCGA-G3-A5SK-A62746	9B6947A8-DE71-4F9B-B433-2C88224A8374	24	YES	671	Doxorubicin	Not Applicable	Chemoembolization	Plastic Beads	Not Applicable	7	2014	Mild	3.3	3.3	4.8	TCGA-G3-A5SK	24259D55-20AC-4359-861F-DCAD7AD88CEE	Not Available	Not Available	Not Available	A	0.6	1.4	0.6	15	-21320		0	302
TCGA-G3-A5SL-01A-11R-A27V-07	Tumor	Yes	Yes	No	TCGA-G3-A5SL	287.61.0	Nationwide Children's Hospital	22	LIHC	4D60DB82-84D8-4EA4-8170-8A1BC5552F80	12	TCGA	2016																			None	3.1	4.2	4.7	TCGA-G3-A5SL	9A56D8A8-DADD-442E-BC09-732CD619AEF7	0	0.8	Not Available	Unknown	0.6	1.4	1	15	-25671		0	243
TCGA-G3-A5SM-01A-12R-A28V-07	Tumor	Yes	Yes	No	TCGA-G3-A5SM	303.59.0	Nationwide Children's Hospital	22	LIHC	3125CB4F-6BA7-473A-AD45-0F58885B79F9	12	TCGA	2016	YES	Radiofrequency Ablation;Radiofrequency Ablation	Not Applicable;Not Applicable	302;365	1;1	1;1	TCGA-G3-A5SM-A62750	1796E529-FEBB-4E24-96C2-D4B5ACD824D7	24	NO	Not Available;Not Available	Not Available;Not Available	Not Applicable;Not Applicable	Not Available;Not Available	Not Available;Not Available	Not Applicable;Not Applicable	7	2014	Unknown	3.3	3.2	4.8	TCGA-G3-A5SM	D397E70F-C174-4656-9B7E-5E4C00754410	0	0.6	Not Available	A	0.5	1.4	0.5	15	-21236		0	133
TCGA-G3-A6UC-01A-21R-A33J-07	Tumor	Yes	Yes	No	TCGA-G3-A6UC	341.53.0	Nationwide Children's Hospital	22	LIHC	32316967-408D-4277-A998-BFFCB230BAF4	12	TCGA	2016																			Mild	3.3	4.6	4.8	TCGA-G3-A6UC	87AA894E-7676-40B7-9557-6541446D8CEA	0	1.0	Not Available	A	0.6	1.4	0.9	3	-23793		0	236
TCGA-G3-A7M5-01A-11R-A33R-07	Tumor	Yes	Yes	No	TCGA-G3-A7M5	345.53.0	Nationwide Children's Hospital	22	LIHC	39B50554-14BC-4188-86D7-F778E360B230	12	TCGA	2016																			None	3.3	4.1	4.8	TCGA-G3-A7M5	869F8A17-BCED-4002-BD60-99DF84A03B93	0	0.5	Not Available	A	0.6	1.4	1.9	5	-27963		0	0
TCGA-G3-A7M6-01A-11R-A33R-07	Tumor	Yes	Yes	No	TCGA-G3-A7M6	345.53.0	Nationwide Children's Hospital	22	LIHC	C41197F8-3430-4A5B-89F3-1800CF7E991A	12	TCGA	2016																			Mild	3.3	3.6	4.8	TCGA-G3-A7M6	2681F83D-233F-4EA2-B5E6-3C05AF81F123	0	0.5	Not Available	A	0.4	1.1	0.6	5	-22205		0	366
TCGA-G3-A7M7-01A-12R-A352-07	Tumor	Yes	Yes	No	TCGA-G3-A7M7	365.54.0	Nationwide Children's Hospital	22	LIHC	EA515450-E914-4924-A06E-1601CEA2879E	12	TCGA	2016																			Severe	3.2	3.5	4.6	TCGA-G3-A7M7	3D048A45-3D5D-4563-ACC8-3C662861F18A	0	0.5	Not Available	A	0.7	1.2	0.6	5	-24002		0	182
TCGA-G3-A7M8-01A-11R-A33R-07	Tumor	Yes	Yes	No	TCGA-G3-A7M8	345.53.0	Nationwide Children's Hospital	22	LIHC	D766D257-C7F1-409A-A141-F885AFDFC11C	12	TCGA	2016																			Unknown	3.3	3.5	4.8	TCGA-G3-A7M8	01CC571C-A47C-4548-9C14-5E51C79B095B	0	1.8	Not Available	A	0.6	1.4	0.7	5	-11527		0	0
TCGA-G3-A7M9-01A-23R-A352-07	Tumor	Yes	Yes	No	TCGA-G3-A7M9	365.54.0	Nationwide Children's Hospital	22	LIHC	83577FCE-DA93-49B6-BB02-8006A0B77D8A	12	TCGA	2016																			None	3.3	3.3	4.8	TCGA-G3-A7M9	115B754D-8559-4F1D-AF44-FCD8C2CEF86A	0	0.4	Not Available	A	0.6	1.4	1	5	-25588	56	0
TCGA-G3-AAUZ-01A-11R-A38B-07	Tumor	Yes	Yes	No	TCGA-G3-AAUZ	399.48.0	Nationwide Children's Hospital	22	LIHC	816873A6-5FA7-4083-9DD8-32B2B113B6F1	12	TCGA	2016																			Severe	3.3	3.8	4.8	TCGA-G3-AAUZ	D74DDBE2-5860-40B1-9BD8-99CC50F3392D	0	0.3	Not Available	A	0.6	1.4	0.8	14	-17760		0	342
TCGA-G3-AAV0-01A-11R-A37K-07	Tumor	Yes	Yes	No	TCGA-G3-AAV0	384.50.0	Nationwide Children's Hospital	22	LIHC	4C071B18-F035-4A7B-8C4D-640BEB192ED0	12	TCGA	2016																			None	3.3	4.2	4.8	TCGA-G3-AAV0	6E657705-8579-433B-AF7A-B6155B599518	0	0.6	Not Available	A	0.6	1.4	0.9	14	-21249		0	260
TCGA-G3-AAV1-01A-11R-A38B-07	Tumor	Yes	Yes	No	TCGA-G3-AAV1	399.48.0	Nationwide Children's Hospital	22	LIHC	1118AC1E-A3EA-48A6-B43B-10B32D80E485	12	TCGA	2016	NO						TCGA-G3-AAV1-A62195	5D3B3242-0A08-41DA-BE37-6C1E9D3BE0AE	14	YES	75;231	Doxorubicin;Not Available	Not Applicable;Not Applicable	Chemoembolization;Radioembolization	Gelfoam;Y-90 Therasphere	Not Applicable;Not Applicable	7	2014	Severe	3.3	3.2	4.8	TCGA-G3-AAV1	EE6D81BF-0470-4652-AFF0-D85F6AB67626	0	0.7	Not Available	B	0.6	1.4	0.7	14	-18973	359	0
TCGA-G3-AAV2-01A-11R-A37K-07	Tumor	Yes	Yes	No	TCGA-G3-AAV2	384.50.0	Nationwide Children's Hospital	22	LIHC	3EBCFBB5-957F-4DD6-BAFD-F922D96041E6	12	TCGA	2016																			Not Available	3.3	4.2	4.8	TCGA-G3-AAV2	1724C96A-2AA3-43D4-992A-08AF948C0F45	0	0.7	Not Available	A	0.6	1.4	1	15	-18363		0	295
TCGA-G3-AAV3-01A-11R-A37K-07	Tumor	Yes	Yes	No	TCGA-G3-AAV3	384.50.0	Nationwide Children's Hospital	22	LIHC	951AA064-8C0F-443F-BEC1-FE7FDA4179AC	12	TCGA	2016																			Severe	3.4	4.4	4.8	TCGA-G3-AAV3	EFC865FD-7C74-4361-9D7A-EEF923DBCD24	0	0.6	1	A	0.5	0.9	0.6	15	-21449		0	279
TCGA-G3-AAV4-01A-11R-A38B-07	Tumor	Yes	Yes	No	TCGA-G3-AAV4	399.48.0	Nationwide Children's Hospital	22	LIHC	D40618E3-DA7D-4213-BA39-8CF18CADD46B	12	TCGA	2016																			Not Available	3.3	2.7	4.8	TCGA-G3-AAV4	0955D871-5413-4AB2-8FDF-B4FEB3AEEF5D	0	0.8	2	A	0.4	1.1	1.1	15	-30466	27	0
TCGA-G3-AAV5-01A-11R-A37K-07	Tumor	Yes	Yes	No	TCGA-G3-AAV5	384.50.0	Nationwide Children's Hospital	22	LIHC	439C6F8F-5B91-4157-827A-6D0F662AAAB2	12	TCGA	2016	NO						TCGA-G3-AAV5-A62435	ACCB5A02-760D-4F04-8AF4-635EC10BB039	16	YES	-57;144	Not Available;Doxorubicin	Not Applicable;Not Applicable	Chemoembolization;Chemoembolization	Not Available;Other, specify	Not Applicable;Renegade Hi-Flo microcatheter	7	2014	Not Available	3.3	4.2	4.8	TCGA-G3-AAV5	4DFF4242-4A53-4F46-B200-7ED83F6B7808	0	0.4	Not Available	A	0.6	1.4	0.8	16	-24655		0	266
TCGA-G3-AAV6-01A-21R-A37K-07	Tumor	Yes	Yes	No	TCGA-G3-AAV6	384.50.0	Nationwide Children's Hospital	22	LIHC	B0ECC1BA-F225-4C15-BF29-0266E81B74E7	12	TCGA	2016																			Severe	3.4	3.9	5.2	TCGA-G3-AAV6	A6733FA1-030A-45ED-9C24-0E64164D4998	0	1.6	Not Available	A	0.6	1.4	0.9	16	-19556	65	0
TCGA-G3-AAV7-01A-11R-A38B-07	Tumor	Yes	Yes	No	TCGA-G3-AAV7	399.48.0	Nationwide Children's Hospital	22	LIHC	24C2FE01-F88A-48B3-B80E-01A77501D459	12	TCGA	2016																			Mild	3.3	4	4.8	TCGA-G3-AAV7	5D259F26-3BEF-4FE4-948B-495183F5F8BE	0	0.9	Not Available	A	0.6	1.4	1.1	16	-14229		0	92
TCGA-GJ-A3OU-01A-31R-A38B-07	Tumor	Yes	Yes	No	TCGA-GJ-A3OU	399.48.0	Nationwide Children's Hospital	22	LIHC	4BCB7F70-3CFC-4B90-8687-5AC489A5A191	12	TCGA	2016																			Unknown	3.5	3.2	5.0	TCGA-GJ-A3OU	FB2ABC2A-ECF1-4184-912F-26A649F861FF	0.0	0.9	1	Unknown	0.6	1.4	0.6	3	-21671		0	697
TCGA-GJ-A6C0-01A-12R-A311-07	Tumor	Yes	Yes	No	TCGA-GJ-A6C0	314.59.0	Nationwide Children's Hospital	22	LIHC	23B8C417-156C-48AA-8D09-E7D49377DF6B	12	TCGA	2016																			Unknown	Not Available	Not Available	Not Available	TCGA-GJ-A6C0	1B326242-4BE6-4F05-B5FB-07ED76B49850	Not Available	Not Available	1	Unknown	Not Available	Not Available	Not Available	27	-27626	31	0
TCGA-GJ-A9DB-01A-11R-A37K-07	Tumor	Yes	Yes	No	TCGA-GJ-A9DB	384.50.0	Nationwide Children's Hospital	22	LIHC	9CBE98F7-9C74-4C23-B645-75D7161D5AE8	12	TCGA	2016																			Unknown	3.5	4.5	5	TCGA-GJ-A9DB	45F00F00-D793-4DCA-AEB9-7626D4575C90	0.0	0.5	1	Unknown	0.8	1.4	1.1	7	-25020	67	0
TCGA-HP-A5MZ-01A-21R-A27V-07	Tumor	Yes	Yes	No	TCGA-HP-A5MZ	287.61.0	Nationwide Children's Hospital	22	LIHC	AC248F49-E640-4378-A753-FADB4DDAC78A	12	TCGA	2016																			Not Available	Not Available	Not Available	Not Available	TCGA-HP-A5MZ	2D00F09F-0074-46C8-B357-B5F33567762A	Not Available	Not Available	Not Available	Unknown	62	120	124	26	-22702	91	0
TCGA-HP-A5N0-01A-11R-A28V-07	Tumor	Yes	Yes	No	TCGA-HP-A5N0	303.59.0	Nationwide Children's Hospital	22	LIHC	40E58611-CD92-4923-A677-E75B388E1C75	12	TCGA	2016																			None	3.5	2.6	4.8	TCGA-HP-A5N0	7F8E25D4-6021-4327-96AB-79B6FCC97A24	Not Available	Not Available	3	Unknown	0	0.9	0.5	30	-32120	752	0
TCGA-K7-A5RF-01A-11R-A28V-07	Tumor	Yes	Yes	No	TCGA-K7-A5RF	303.59.0	Nationwide Children's Hospital	22	LIHC	5F579D47-F114-4599-A8EE-8C0614497F64	12	TCGA	2016	NO						TCGA-K7-A5RF-A63821	CFA73AF8-20C4-43EC-B5EA-C17F5563D3B2	19	YES	240;275	Doxorubicin;Doxorubicin	Not Applicable;Not Applicable	Chemoembolization;Chemoembolization	Plastic Beads;Plastic Beads	Not Applicable;Not Applicable	8	2014	Not Available	Not Available	Not Available	Not Available	TCGA-K7-A5RF	3134F7D1-3359-497A-B8BE-1F317D8DDAAA	Not Available	Not Available	Not Available	Unknown	Not Available	Not Available	Not Available	24	-23557		0	240
TCGA-K7-A5RG-01A-11R-A28V-07	Tumor	Yes	Yes	No	TCGA-K7-A5RG	303.59.0	Nationwide Children's Hospital	22	LIHC	8D5E0BE3-4141-427B-A49C-156F2CE9BBF2	12	TCGA	2016																			Not Available	Not Available	Not Available	Not Available	TCGA-K7-A5RG	4FD3ED02-7B66-47BF-8B92-31FEE1093A87	Not Available	Not Available	1	Unknown	Not Available	Not Available	Not Available	21	-24218		0	120
TCGA-K7-A6G5-01A-11R-A311-07	Tumor	Yes	Yes	No	TCGA-K7-A6G5	314.59.0	Nationwide Children's Hospital	22	LIHC	B51D70D6-53D3-462E-9C31-0F85340A2919	12	TCGA	2016																			Not Available	Not Available	Not Available	Not Available	TCGA-K7-A6G5	81EDDCDA-0069-4652-9DC6-8AAC89CBA1FF	Not Available	Not Available	Not Available	Not Available	Not Available	Not Available	Not Available	12	-24233		0	122
TCGA-K7-AAU7-01A-11R-A38B-07	Tumor	Yes	Yes	No	TCGA-K7-AAU7	399.48.0	Nationwide Children's Hospital	22	LIHC	5842A760-62FF-4A70-9BCA-398D6085BF12	12	TCGA	2016																			Not Available	Not Available	Not Available	Not Available	TCGA-K7-AAU7	1EACFCC0-1D05-4441-B3D8-B0790E1C40F1	Not Available	Not Available	2	A	Not Available	Not Available	Not Available	18	-22476		0	113
TCGA-KR-A7K0-01A-12R-A33R-07	Tumor	Yes	Yes	No	TCGA-KR-A7K0	345.53.0	Nationwide Children's Hospital	22	LIHC	A24563BF-AE76-400E-BE64-04DD3B91E23C	12	TCGA	2016																			Not Available	3.5	2.8	4.9	TCGA-KR-A7K0	5A7706BA-3CEA-41EB-B78A-FD69206DAA93	0.2	1.3	Not Available	Unknown	0.7	1.3	0.7	28	-23974	65	0
TCGA-KR-A7K2-01A-12R-A33R-07	Tumor	Yes	Yes	No	TCGA-KR-A7K2	345.53.0	Nationwide Children's Hospital	22	LIHC	60047FEF-A09C-4E58-AA96-2B134858A90E	12	TCGA	2016																			Unknown	3.5	3.3	4.9	TCGA-KR-A7K2	FBB398FE-2BA8-4845-8083-6533ECB4A52E	0.2	1.5	Not Available	Unknown	0.7	1.3	1.1	28	-23699		0	360
TCGA-KR-A7K7-01A-11R-A33J-07	Tumor	Yes	Yes	No	TCGA-KR-A7K7	341.53.0	Nationwide Children's Hospital	22	LIHC	FAAEA833-D230-488B-B52C-CE7B4EC4E560	12	TCGA	2016																			Not Available	3.5	3.4	4.9	TCGA-KR-A7K7	7BA3D8F1-0C26-4C49-8D6B-0F2875B58DAF	0.2	1.4	Not Available	Unknown	0.5	1.0	0.8	27	-22587		0	407
TCGA-KR-A7K8-01A-11R-A33J-07	Tumor	Yes	Yes	No	TCGA-KR-A7K8	341.53.0	Nationwide Children's Hospital	22	LIHC	AF242BA7-5AF4-442A-AF70-E847E0326959	12	TCGA	2016																			None	3.5	3.3	4.9	TCGA-KR-A7K8	4B0E544C-4090-4EBB-B3E5-2623AA91356C	0.2	1.9	1	Unknown	0.7	1.3	1.1	28	-20914		0	741
TCGA-LG-A6GG-01A-11R-A311-07	Tumor	Yes	Yes	No	TCGA-LG-A6GG	314.59.0	Nationwide Children's Hospital	22	LIHC	166A88A1-48BE-4253-B19A-5D68823B2349	12	TCGA	2016																			None	3.4	3.7	4.8	TCGA-LG-A6GG	C618DA6D-3C66-4A6A-8832-3526A3B75410	0.2	0.8	Not Available	A	0.4	1.1	0.6	25	-28871		0	15
TCGA-LG-A9QC-01A-11R-A37K-07	Tumor	Yes	Yes	No	TCGA-LG-A9QC	384.50.0	Nationwide Children's Hospital	22	LIHC	4C95AB88-E7BF-42E7-865C-B834693A67FB	12	TCGA	2016																			Mild	3.5	4.7	5.0	TCGA-LG-A9QC	8C2783EF-AA41-44C9-BE87-FA4C84108F1E	0.2	2.8	1	Unknown	0.5	1.3	0.8	7	-17842		0	180
TCGA-LG-A9QD-01A-11R-A38B-07	Tumor	Yes	Yes	No	TCGA-LG-A9QD	399.48.0	Nationwide Children's Hospital	22	LIHC	BBCA1334-DBBE-429F-B887-6116E108D829	12	TCGA	2016																			Mild	3.4	2.9	4.8	TCGA-LG-A9QD	948A9BBC-60B0-4FB7-A707-76BC41294217	0.0	0.5	3	Unknown	0.7	1.5	0.9	7	-24969		0	130
TCGA-MI-A75C-01A-11R-A32O-07	Tumor	Yes	Yes	No	TCGA-MI-A75C	327.54.0	Nationwide Children's Hospital	22	LIHC	3DB775A6-251A-43A8-8438-B9BBA452A7BE	12	TCGA	2016																			Not Available	3.5	4.0	4.9	TCGA-MI-A75C	A6C0DEF6-7649-485A-A679-50DAFB5EADE5	0.2	1.1	Not Available	A	0.6	1.3	1.0	19	-23441		0	291
TCGA-MI-A75E-01A-11R-A32O-07	Tumor	Yes	Yes	No	TCGA-MI-A75E	327.54.0	Nationwide Children's Hospital	22	LIHC	305D29C7-216C-486B-A835-3190388A4CCF	12	TCGA	2016																			Not Available	3.5	3.0	4.9	TCGA-MI-A75E	010D5817-9A3F-4A06-8643-653116C044FF	0.2	1.1	1	A	0.6	1.3	Not Available	19	-22457		0	155
TCGA-MI-A75G-01A-11R-A32O-07	Tumor	Yes	Yes	No	TCGA-MI-A75G	327.54.0	Nationwide Children's Hospital	22	LIHC	0CBF6C03-9A48-4990-B6EC-360A5207910B	12	TCGA	2016																			Not Available	3.5	2.3	4.9	TCGA-MI-A75G	22DD3876-1F2C-4DDD-8FAE-F5FB820993BA	0.2	1.7	1	B	0.6	1.3	0.5	20	-23284		0	433
TCGA-MI-A75H-01A-11R-A32O-07	Tumor	Yes	Yes	No	TCGA-MI-A75H	327.54.0	Nationwide Children's Hospital	22	LIHC	E53CF7BF-A15E-4B36-BF10-2F4901844619	12	TCGA	2016	YES	Radiofrequency Ablation	Not Applicable	350	1	1	TCGA-MI-A75H-A51546	DF17533C-CE9B-483C-8C88-23C6240447E1	20	YES	746	Doxorubicin	Not Applicable	Chemoembolization	Plastic Beads	Not Applicable	11	2013	Not Available	3.5	3.3	4.9	TCGA-MI-A75H	F3F6BA92-C68F-4313-99F4-0281272E02B6	0.2	2.3	Not Available	B	0.6	1.3	Not Available	20	-28371		0	391
TCGA-MI-A75I-01A-11R-A32O-07	Tumor	Yes	Yes	No	TCGA-MI-A75I	327.54.0	Nationwide Children's Hospital	22	LIHC	27A72EDF-5B28-4745-AF4D-757724C0BC82	12	TCGA	2016																			Not Available	Not Available	Not Available	Not Available	TCGA-MI-A75I	55E53229-C58F-4922-8869-0F5E2F6C2D7D	Not Available	Not Available	3	A	Not Available	Not Available	Not Available	20	-22341		0	265
TCGA-MR-A520-01A-11R-A266-07	Tumor	Yes	Yes	No	TCGA-MR-A520	275.62.0	Nationwide Children's Hospital	22	LIHC	62E2BAEA-E3CF-4FE5-BABB-F8A5A5C6FB47	12	TCGA	2016																			Not Available	Not Available	Not Available	Not Available	TCGA-MR-A520	25E893AD-A0FD-45AE-9AA9-9BCD7C2EC8E5	Not Available	Not Available	Not Available	Not Available	Not Available	Not Available	Not Available	11	-21398		0	19
TCGA-MR-A8JO-01A-12R-A36F-07	Tumor	Yes	Yes	No	TCGA-MR-A8JO	377.51.0	Nationwide Children's Hospital	22	LIHC	AC2CF4FA-9E6E-4ED6-AC1E-247D5655011C	12	TCGA	2016																			Not Available	3.9	4.1	5.1	TCGA-MR-A8JO	8574D285-E02A-4D2B-931B-73556A9FDA02	0.2	0.8	Not Available	Unknown	Not Available	Not Available	Not Available	9	-12669		0	52
TCGA-NI-A4U2-01A-11R-A28V-07	Tumor	Yes	Yes	No	TCGA-NI-A4U2	303.59.0	Nationwide Children's Hospital	22	LIHC	C45EF4E6-535D-43EB-BB6B-40D63ABE9166	12	TCGA	2016																			None	Not Available	Not Available	Not Available	TCGA-NI-A4U2	9AEA3437-572A-48C6-BEB9-9BDBCB243875	Not Available	Not Available	3	Unknown	Not Available	Not Available	0.8	28	-26011	1791	0
TCGA-NI-A8LF-01A-11R-A36F-07	Tumor	Yes	Yes	No	TCGA-NI-A8LF	377.51.0	Nationwide Children's Hospital	22	LIHC	3F95ABA6-C6DE-43DB-A884-D5922F615A0B	12	TCGA	2016																			None	Not Available	1.2	Not Available	TCGA-NI-A8LF	420DC176-E9A8-484B-BFA3-1B84E039C26B	Not Available	0.6	1	Unknown	Not Available	Not Available	15	3	-27162		0	498
TCGA-O8-A75V-01A-11R-A32O-07	Tumor	Yes	Yes	No	TCGA-O8-A75V	327.54.0	Nationwide Children's Hospital	22	LIHC	FA61EBDE-D881-4EC5-8377-03384CC68192	12	TCGA	2016																			Mild	2.9	3.8	4.4	TCGA-O8-A75V	76CC9C06-0827-465E-BAB3-5F4115295EBE	0.3	1.9	1	A	0.50	1.50	1	29	-19850		0	135
TCGA-PD-A5DF-01A-11R-A27V-07	Tumor	Yes	Yes	No	TCGA-PD-A5DF	287.61.0	Nationwide Children's Hospital	22	LIHC	82AEAD2E-4E9A-473A-BDD8-C98D62ACA784	12	TCGA	2016																			Not Available	Not Available	Not Available	Not Available	TCGA-PD-A5DF	1987B453-F97D-45C7-9C89-B9A33313D645	Not Available	Not Available	Not Available	Unknown	Not Available	Not Available	Not Available	30	-21414	639	0
TCGA-QA-A7B7-01A-11R-A32O-07	Tumor	Yes	Yes	No	TCGA-QA-A7B7	327.54.0	Nationwide Children's Hospital	22	LIHC	B382E5E5-C2D3-4CAA-865C-4FF7882A3565	12	TCGA	2016																			Mild	3.5	4.2	4.8	TCGA-QA-A7B7	B0952FD6-62EE-44EF-9A2A-E5262ED4721A	0.3	1.0	Not Available	A	0.7	1.2	1	23	-17636		0	62
TCGA-RC-A6M3-01A-11R-A32O-07	Tumor	Yes	Yes	No	TCGA-RC-A6M3	327.54.0	Nationwide Children's Hospital	22	LIHC	7DEC961F-61FE-40B4-9C36-06CB1D6A8787	12	TCGA	2016																			Not Available	Not Available	Not Available	Not Available	TCGA-RC-A6M3	C6A74DB2-CF97-4C7B-BE8C-557EE27E1D43	Not Available	Not Available	Not Available	Not Available	Not Available	Not Available	Not Available	9	-8899		0	0
TCGA-RC-A6M4-01A-11R-A32O-07	Tumor	Yes	Yes	No	TCGA-RC-A6M4	327.54.0	Nationwide Children's Hospital	22	LIHC	3C9DFA36-E2F4-43F6-A721-192C78EDE3F1	12	TCGA	2016																			Not Available	3.5	2.3	4.8	TCGA-RC-A6M4	2D1DC64D-27DE-4C83-A7FA-88DA5B48BF24	0.2	0.6	2	A	0.8	1.3	0.9	9	-27327		0	22
TCGA-RC-A6M5-01A-11R-A32O-07	Tumor	Yes	Yes	No	TCGA-RC-A6M5	327.54.0	Nationwide Children's Hospital	22	LIHC	F47CE518-6653-4F75-9AEA-E0DB5704086B	12	TCGA	2016																			Not Available	3.5	3.9	4.8	TCGA-RC-A6M5	D504EE30-6955-4A7B-9311-55AD3DECADD5	0.2	0.5	Not Available	A	0.8	1.3	0.4	9	-7634		0	15
TCGA-RC-A6M6-01A-11R-A32O-07	Tumor	Yes	Yes	No	TCGA-RC-A6M6	327.54.0	Nationwide Children's Hospital	22	LIHC	0399D53E-BA31-416F-BB0A-1DCF8A034692	12	TCGA	2016																			Not Available	3.5	2.8	4.8	TCGA-RC-A6M6	A62F065E-7491-493A-87B3-D213CD87091D	0.2	2.3	Not Available	B	0.8	1.3	0.8	9	-27649		0	9
TCGA-RC-A7S9-01A-11R-A33R-07	Tumor	Yes	Yes	No	TCGA-RC-A7S9	345.53.0	Nationwide Children's Hospital	22	LIHC	E45A40C8-2E56-407F-A54E-45D1A7912AB5	12	TCGA	2016																			Mild	3.1	4.3	5.2	TCGA-RC-A7S9	F5DE6712-4DE4-43DE-8EB5-EC2A798C8438	0.1	0.8	Not Available	A	0.3	1.20	0.7	21	-17403		0	640
TCGA-RC-A7SB-01A-21R-A352-07	Tumor	Yes	Yes	No	TCGA-RC-A7SB	365.54.0	Nationwide Children's Hospital	22	LIHC	15975ECA-F13C-4E5F-BDF8-5178A374BE1D	12	TCGA	2016																			None	3.1	4.8	5.2	TCGA-RC-A7SB	26D93D77-AB66-45AA-A162-98D091221AFB	0.1	3.7	Not Available	B	0.3	1.20	1.1	21	-19698		0	588
TCGA-RC-A7SF-01A-11R-A352-07	Tumor	Yes	Yes	No	TCGA-RC-A7SF	365.54.0	Nationwide Children's Hospital	22	LIHC	14D81C56-9589-4331-8D31-409EFE8533BF	12	TCGA	2016																			None	3.1	4.4	5.2	TCGA-RC-A7SF	714A6878-ED2A-47F3-9755-B705AC144D68	0.1	0.8	Not Available	A	0.3	1.20	1.0	21	-24432		0	579
TCGA-RC-A7SH-01A-11R-A38B-07	Tumor	Yes	Yes	No	TCGA-RC-A7SH	399.48.0	Nationwide Children's Hospital	22	LIHC	ADCCBCC5-69F4-4703-BEF5-55033C2D2030	12	TCGA	2016																			None	3.1	4.1	5.2	TCGA-RC-A7SH	32A98B3D-4CBD-4DCC-AC71-428FAFC5E1C3	0.1	0.5	Not Available	A	0.3	1.20	0.8	21	-15560		0	468
TCGA-RC-A7SK-01A-11R-A352-07	Tumor	Yes	Yes	No	TCGA-RC-A7SK	365.54.0	Nationwide Children's Hospital	22	LIHC	4F1118A5-6226-425A-8CF2-26FA3CC4B3F2	12	TCGA	2016																			None	3.1	4.3	5.2	TCGA-RC-A7SK	ACFD58EB-C546-49C3-A846-684F22428219	0.1	0.6	Not Available	A	0.3	1.20	1	21	-21814		0	472
TCGA-RG-A7D4-01A-12R-A33R-07	Tumor	Yes	Yes	No	TCGA-RG-A7D4	345.53.0	Nationwide Children's Hospital	22	LIHC	66480110-9225-4ADB-A452-AF451BA2F1E3	12	TCGA	2016																			Unknown	3	3	5	TCGA-RG-A7D4	08CBBB39-D05A-48B0-A966-5212C5923C8B	1	1	2	A	1	2	1	27	-25302		0	734
TCGA-T1-A6J8-01A-11R-A32O-07	Tumor	Yes	Yes	No	TCGA-T1-A6J8	327.54.0	Nationwide Children's Hospital	22	LIHC	0E22DEB8-5CE9-42AB-8FBA-6CAC393A9645	12	TCGA	2016																			Not Available	Not Available	Not Available	Not Available	TCGA-T1-A6J8	59F163D2-6A7C-41B8-B4D6-F07174DAFC6E	Not Available	Not Available	Not Available	Not Available	Not Available	Not Available	Not Available	12	-24853		0	23
TCGA-UB-A7MA-01A-11R-A33R-07	Tumor	Yes	Yes	No	TCGA-UB-A7MA	345.53.0	Nationwide Children's Hospital	22	LIHC	95DCFA8E-9D1A-4BAB-A1E5-30D4D2C6CCBA	12	TCGA	2016	YES	Radiofrequency Ablation	Not Applicable	295	4	1	TCGA-UB-A7MA-A63550	DD46242B-D31B-4035-9A6F-D3C7547F3F36	12	YES	294	Mitomycin C	Not Applicable	Chemoembolization	Other, specify	Ethiodol	8	2014	None	3.4	4.0	5.0	TCGA-UB-A7MA	10179EFC-A091-4119-8EC2-30DB6269D674	0	1.2	Not Available	A	0.4	0.90	0.7	12	-22843		0	455
TCGA-UB-A7MB-01A-11R-A33R-07	Tumor	Yes	Yes	No	TCGA-UB-A7MB	345.53.0	Nationwide Children's Hospital	22	LIHC	16F9A1C0-2ABA-42C1-BCFC-225F98E5B930	12	TCGA	2016	NO;YES	Radiofrequency Ablation	Not Applicable	365	1	1	TCGA-UB-A7MB-A69955;TCGA-UB-A7MB-A63685	3A2D60D6-5CD4-43E6-957D-F2B0EF1EC49F;0F7DA27F-5C06-479C-B6BD-1CD6AA8A6B65	22;15	YES;YES	390;428;85;112;390;417	Mitomycin C;Doxorubicin;Doxorubicin;Doxorubicin;Doxorubicin;Not Available	Not Applicable;Not Applicable;Not Applicable;Not Applicable;Not Applicable;Not Applicable	Chemoembolization;Chemoembolization;Chemoembolization;Chemoembolization;Chemoembolization;Radioembolization	Other, specify;Plastic Beads;Plastic Beads;Plastic Beads;Other, specify;Y-90 Therasphere	Ethiodol;Not Applicable;Not Applicable;Not Applicable;Ethiodol;Not Applicable	1;8	2014;2014	None	3.5	3.1	4.8	TCGA-UB-A7MB	AF1E56AF-410C-4CAD-A4E8-1C6937F1A350	0.2	0.4	Not Available	A	0.7	1.2	0.4	15	-8951		0	526
TCGA-UB-A7MC-01A-11R-A33R-07	Tumor	Yes	Yes	No	TCGA-UB-A7MC	345.53.0	Nationwide Children's Hospital	22	LIHC	DFDB9849-C721-451B-B679-85889148F8D1	12	TCGA	2016	NO;NO						TCGA-UB-A7MC-A67162;TCGA-UB-A7MC-A67164	57299E12-8A0A-4F20-9874-3303A63E1F71;E6E52CBB-FBEB-4D02-BD48-1EF63DFBB83C	31;31	YES;YES	343;351;371;471;471;343;351;371	Doxorubicin;Doxorubicin;Doxorubicin;Doxorubicin;Mitomycin C;Mitomycin C;Mitomycin C;Mitomycin C	Not Applicable;Not Applicable;Not Applicable;Not Applicable;Not Applicable;Not Applicable;Not Applicable;Not Applicable	Chemoembolization;Chemoembolization;Chemoembolization;Chemoembolization;Chemoembolization;Chemoembolization;Chemoembolization;Chemoembolization	Other, specify;Other, specify;Other, specify;Other, specify;Other, specify;Other, specify;Other, specify;Other, specify	Lipiodol;Lipiodol;Lipiodol;Lipiodol;Lipiodol;Lipiodol;Lipiodol;Lipiodol	10;10	2014;2014	Mild	3.5	3.9	4.8	TCGA-UB-A7MC	F82AFF25-0725-48D1-AEFD-D60800F7D1AB	0.2	1.5	Not Available	A	0.7	1.2	0.7	15	-21733		0	438
TCGA-UB-A7MD-01A-12R-A352-07	Tumor	Yes	Yes	No	TCGA-UB-A7MD	365.54.0	Nationwide Children's Hospital	22	LIHC	F997146E-0F5E-45A3-A4EE-056788350C07	12	TCGA	2016																			Unknown	3.5	3.5	4.8	TCGA-UB-A7MD	C49B41BF-0025-4682-966B-CFE8FB2B2546	0.2	0.8	Not Available	A	0.7	1.2	1.0	15	-24717	52	0
TCGA-UB-A7ME-01A-11R-A33J-07	Tumor	Yes	Yes	No	TCGA-UB-A7ME	341.53.0	Nationwide Children's Hospital	22	LIHC	C2B50B27-A785-46FA-BCD1-5124345D5671	12	TCGA	2016																			Mild	3.5	4.2	4.8	TCGA-UB-A7ME	BE1240F0-34DC-4205-B152-C26F11D28462	0.2	0.6	Not Available	B	0.7	1.2	1.1	16	-18846		0	486
TCGA-UB-A7MF-01A-11R-A33J-07	Tumor	Yes	Yes	No	TCGA-UB-A7MF	341.53.0	Nationwide Children's Hospital	22	LIHC	78758CE5-433F-4B75-BA67-6C05E87F63EC	12	TCGA	2016																			Unknown	3.5	3.6	4.8	TCGA-UB-A7MF	8EEF926B-F316-4FDB-B84A-262010258FEB	0.2	1.1	1	A	0.7	1.2	0.9	16	-20815	214	0
TCGA-UB-AA0U-01A-11R-A38B-07	Tumor	Yes	Yes	No	TCGA-UB-AA0U	399.48.0	Nationwide Children's Hospital	22	LIHC	3684E98E-72C5-4F08-ACD8-90950C49F94F	12	TCGA	2016	NO;YES	Radiofrequency Ablation	Not Applicable	326	1	3	TCGA-UB-AA0U-A63752;TCGA-UB-AA0U-A67167	77D7BFCB-AB00-4BE5-9602-0FFCA3FAF0BE;22C851AD-089C-49DA-8125-1D131A0ACF03	16;31	YES;NO	161;205;Not Available	Doxorubicin;Doxorubicin;Not Available	Not Applicable;Not Applicable;Not Applicable	Chemoembolization;Chemoembolization;Not Available	Other, specify;Other, specify;Not Available	Ethiodol;Ethiodol;Not Applicable	8;10	2014;2014	Mild	3.5	3.9	4.8	TCGA-UB-AA0U	AE8D4B34-D40A-482D-9D45-23242843DF00	0.2	0.7	2	A	0.7	1.2	0.6	16	-21985		0	253
TCGA-UB-AA0V-01A-11R-A38B-07	Tumor	Yes	Yes	No	TCGA-UB-AA0V	399.48.0	Nationwide Children's Hospital	22	LIHC	498F629F-BE48-4B0D-9F60-CF8906C92BDC	12	TCGA	2016																			Mild	3.5	3.8	4.8	TCGA-UB-AA0V	EA214F79-0F6B-403F-8693-C844BF4B77CB	0.2	1.0	1	A	0.5	1.0	0.7	16	-25340		0	139
TCGA-WJ-A86L-01A-12R-A39D-07	Tumor	Yes	Yes	No	TCGA-WJ-A86L	405.45.0	Nationwide Children's Hospital	22	LIHC	0D826B46-BE6C-42F0-BD46-EBC87279C432	12	TCGA	2016																			None	3.4	4.2	4.8	TCGA-WJ-A86L	63D475EF-8F26-45ED-AE80-CFA87E68B2F5	0.1	0.5	Not Available	A	0.5	1.1	0.9	29	-25018		0	31
TCGA-WQ-A9G7-01A-11R-A37K-07	Tumor	Yes	Yes	No	TCGA-WQ-A9G7	384.50.0	Nationwide Children's Hospital	22	LIHC	6B2377AD-A30B-4AD5-9024-91877C369989	12	TCGA	2016																			Unknown	3.5	3.5	5	TCGA-WQ-A9G7	491A3734-DCB8-4779-B098-0B5567F13F87	0.3	0.7	Not Available	Unknown	0.4	1	0.4	21	Not Available		0	30
TCGA-WQ-AB4B-01A-11R-A41C-07	Tumor	Yes	Yes	No	TCGA-WQ-AB4B	425.45.0	Nationwide Children's Hospital	22	LIHC	4CD5F137-C604-41B4-85D2-DD4DCE7AF1A8	12	TCGA	2016																			Not Available	3.5	3.3	5	TCGA-WQ-AB4B	D5471A2B-F14C-44DE-9142-5A5FB07B6FC2	0.3	1.7	Not Available	A	0.4	1.2	1.1	18	-22769		0	122
TCGA-WX-AA44-01A-11R-A39D-07	Tumor	Yes	Yes	No	TCGA-WX-AA44	405.45.0	Nationwide Children's Hospital	22	LIHC	5A9FFB0F-4391-4776-A228-0DE116B72D68	12	TCGA	2016	NO						TCGA-WX-AA44-A70655	895DE754-2102-438F-9A1D-E4A8443D0344	2	YES	274	Not Available	Not Applicable	Radioembolization	Y-90 Sirsphere	Not Applicable	3	2012	None	3.5	4.4	5.0	TCGA-WX-AA44	5436FAFB-BC16-4450-AC8B-568E1E5EE5FE	0	0.5	Not Available	A	0.5	1.2	0.6	21	-23654		0	473
TCGA-WX-AA46-01A-11R-A39D-07	Tumor	Yes	Yes	No	TCGA-WX-AA46	405.45.0	Nationwide Children's Hospital	22	LIHC	8FDA4A6B-7F29-44EE-9932-A58127D93B71	12	TCGA	2016																			None	3.5	4.6	5.0	TCGA-WX-AA46	02C41E28-CF14-42E2-9E15-F43248AE16E0	0	1.3	3	A	0.5	1.2	1.2	10	-22639		0	553
TCGA-WX-AA47-01A-11R-A39D-07	Tumor	Yes	Yes	No	TCGA-WX-AA47	405.45.0	Nationwide Children's Hospital	22	LIHC	D7108BE0-6507-4453-87C9-8AD5C1516CE7	12	TCGA	2016																			Mild	3.5	2.8	5.0	TCGA-WX-AA47	39E147C9-2ACB-4BA8-A991-E43E1719B2D8	Not Available	0.2	Not Available	A	0.5	1.2	0.6	10	-12056	556	0
TCGA-XR-A8TC-01A-11R-A36F-07	Tumor	Yes	Yes	No	TCGA-XR-A8TC	377.51.0	Nationwide Children's Hospital	22	LIHC	B5D05E42-C871-4259-BE81-9FB62B1C42B7	12	TCGA	2016																			Mild	3.5	3.9	4.8	TCGA-XR-A8TC	4DB9DE75-9297-46E5-ACC5-9275F52A642A	0.2	0.2	Not Available	A	0.7	1.5	0.7	20	-15817		0	1339
TCGA-XR-A8TD-01A-12R-A39D-07	Tumor	Yes	Yes	No	TCGA-XR-A8TD	405.45.0	Nationwide Children's Hospital	22	LIHC	BFF62177-2882-4F02-99B4-8BE3CF6D4153	12	TCGA	2016																			None	3.5	3.8	4.8	TCGA-XR-A8TD	574BA00B-FEE6-4AAB-AC01-6FFAF8FDC0C5	0.2	0.7	Not Available	A	0.7	1.5	0.5	20	-17908		0	1030
TCGA-XR-A8TE-01A-11R-A36F-07	Tumor	Yes	Yes	No	TCGA-XR-A8TE	377.51.0	Nationwide Children's Hospital	22	LIHC	0A60F479-85BB-4147-8867-D4AF7ABD1B3A	12	TCGA	2016																			None	3.2	3.9	4.5	TCGA-XR-A8TE	EC4B4D34-2576-4412-B036-7460E64F4398	Not Available	Not Available	Not Available	Not Available	0.7	1.5	0.4	20	-5862		0	925
TCGA-XR-A8TF-01A-11R-A36F-07	Tumor	Yes	Yes	No	TCGA-XR-A8TF	377.51.0	Nationwide Children's Hospital	22	LIHC	807A3FED-BE3E-4130-96A2-96E67922F3FB	12	TCGA	2016																			None	3.5	3.9	4.8	TCGA-XR-A8TF	1E9F910C-82C0-4222-A62F-B656839307FC	0.2	0.8	Not Available	A	0.7	1.5	0.8	20	-27145	693	0
TCGA-XR-A8TG-01A-11R-A36F-07	Tumor	Yes	Yes	No	TCGA-XR-A8TG	377.51.0	Nationwide Children's Hospital	22	LIHC	EA4C0B7A-AF4E-4DDD-B7BE-38BC56A9E949	12	TCGA	2016																			Mild	3.5	4.3	4.8	TCGA-XR-A8TG	1D7D5166-6582-4EA1-B242-37C2C3919A3C	0.2	0.5	2	Not Available	0.7	1.5	0.9	20	-21544		0	867
TCGA-YA-A8S7-01A-11R-A37K-07	Tumor	Yes	Yes	No	TCGA-YA-A8S7	384.50.0	Nationwide Children's Hospital	22	LIHC	D9DA66B8-ADDD-4DA3-92D4-4EA579763B1B	12	TCGA	2016																			Mild	3.5	2.1	5.0	TCGA-YA-A8S7	BB2069D3-E699-4A8A-BB61-B3C28B98A66B	0.2	3.8	Not Available	Unknown	0.60	1.3	0.7	8	-25188	412	0
TCGA-ZP-A9CV-01A-11R-A38B-07	Tumor	Yes	Yes	No	TCGA-ZP-A9CV	399.48.0	Nationwide Children's Hospital	22	LIHC	76DF8CE1-7978-492B-9295-DD171F03C502	12	TCGA	2016																			Severe	3.5	4	5.7	TCGA-ZP-A9CV	91909C63-DEBC-42AD-B4BE-56870195BDCB	0.2	0.5	Not Available	A	0.7	1.3	0.8	28	-21633		0	142
TCGA-ZP-A9CY-01A-11R-A38B-07	Tumor	Yes	Yes	No	TCGA-ZP-A9CY	399.48.0	Nationwide Children's Hospital	22	LIHC	0FAAEEEA-E366-4235-8E01-8F3E4A1BC5FD	12	TCGA	2016																			Mild	3.5	3.9	5.2	TCGA-ZP-A9CY	34FD27CE-930A-4F29-8A6E-DAE4949D92EB	0.2	0.9	1	A	Not Available	Not Available	Not Available	28	-24223		0	782
TCGA-ZP-A9CZ-01A-11R-A38B-07	Tumor	Yes	Yes	No	TCGA-ZP-A9CZ	399.48.0	Nationwide Children's Hospital	22	LIHC	E2E1330B-EBE5-4D76-8929-37D591672164	12	TCGA	2016																			Not Available	3.5	4.4	5.2	TCGA-ZP-A9CZ	22077056-067D-4DB5-98E5-106778CECA56	0.2	0.5	2	A	Not Available	Not Available	Not Available	28	-26403		0	706
TCGA-ZP-A9D0-01A-11R-A37K-07	Tumor	Yes	Yes	No	TCGA-ZP-A9D0	384.50.0	Nationwide Children's Hospital	22	LIHC	67A3513A-6B62-4C1C-B970-22FE405B7F04	12	TCGA	2016																			Mild	3.5	4.1	5.2	TCGA-ZP-A9D0	396EF7C2-343E-4D5C-9B20-ADC0A52C1978	0.2	1.4	Not Available	A	0.5	1.1	0.9	28	-24525		0	717
TCGA-ZP-A9D1-01A-11R-A38B-07	Tumor	Yes	Yes	No	TCGA-ZP-A9D1	399.48.0	Nationwide Children's Hospital	22	LIHC	96F342F5-F8AE-4900-A963-08AED96FDAE6	12	TCGA	2016																			Not Available	Not Available	Not Available	Not Available	TCGA-ZP-A9D1	447AC9E3-0533-461A-BC92-906A7B2180C3	Not Available	Not Available	1	A	Not Available	Not Available	Not Available	28	-20584		0	21
TCGA-ZP-A9D2-01A-11R-A38B-07	Tumor	Yes	Yes	No	TCGA-ZP-A9D2	399.48.0	Nationwide Children's Hospital	22	LIHC	154CA870-99D9-4492-96EF-DC3476206036	12	TCGA	2016																			Mild	Not Available	Not Available	Not Available	TCGA-ZP-A9D2	CBB89556-D783-4E70-8DB4-EF53E9A45922	Not Available	Not Available	1	A	Not Available	Not Available	Not Available	28	-18717		0	743
TCGA-ZP-A9D4-01A-11R-A37K-07	Tumor	Yes	Yes	No	TCGA-ZP-A9D4	384.50.0	Nationwide Children's Hospital	22	LIHC	C00E36C7-9BCF-4759-AEC8-9C1CE419D14F	12	TCGA	2016																			Mild	3.5	4.3	5.2	TCGA-ZP-A9D4	4244912D-8527-410C-A084-A56C55EB1F82	0.2	0.4	Not Available	A	0.5	1.1	0.6	28	-23656		0	395
TCGA-ZS-A9CD-01A-11R-A37K-07	Tumor	Yes	Yes	No	TCGA-ZS-A9CD	384.50.0	Nationwide Children's Hospital	22	LIHC	98BB532B-F0CF-42E1-8C5B-A586BB3EADD4	12	TCGA	2016																			Mild	36	48	50	TCGA-ZS-A9CD	9197CA4C-E48C-43AF-BA61-D894FAF3CC24	0	8	Not Available	A	62	106	73	30	-26915	1386	0
TCGA-ZS-A9CE-01A-11R-A37K-07	Tumor	Yes	Yes	No	TCGA-ZS-A9CE	384.50.0	Nationwide Children's Hospital	22	LIHC	C466DEC3-2A70-4E84-88A0-CF4C0FA959EC	12	TCGA	2016																			None	36	44	50	TCGA-ZS-A9CE	7BDC5F86-4D7D-4F1F-BC23-AB51FA9FB947	0	5	Not Available	A	44	80	78	30	-29051		0	1066
TCGA-ZS-A9CF-01A-11R-A38B-07	Tumor	Yes	Yes	No	TCGA-ZS-A9CF	399.48.0	Nationwide Children's Hospital	22	LIHC	34558B8F-A587-4781-BD47-C96AC932F88F	12	TCGA	2016																			None	36	51	50	TCGA-ZS-A9CF	7FE5E2D9-C514-47BC-8387-3F940F7A822D	0	19	Not Available	Unknown	62	106	89	1	-23510		0	2258
TCGA-ZS-A9CF-02A-11R-A38B-07	Tumor	Yes	Yes	Yes	TCGA-ZS-A9CF	399.48.0	Nationwide Children's Hospital	22	LIHC	34558B8F-A587-4781-BD47-C96AC932F88F	12	TCGA	2016																			None	36	51	50	TCGA-ZS-A9CF	7FE5E2D9-C514-47BC-8387-3F940F7A822D	0	19	Not Available	Unknown	62	106	89	1	-23510		0	2258
TCGA-ZS-A9CG-01A-11R-A37K-07	Tumor	Yes	Yes	No	TCGA-ZS-A9CG	384.50.0	Nationwide Children's Hospital	22	LIHC	590A87F0-772A-422A-B191-1C982DE7E793	12	TCGA	2016																			Mild	35	40	50	TCGA-ZS-A9CG	3F6A6891-C6D5-447B-AD32-325FD46EC32B	0	5	Not Available	A	62	106	72	30	-20100		0	250
		No	Yes	No	TCGA-DD-A1E9	131.77.0	Nationwide Children's Hospital	22	LIHC	E8A9F710-0BE6-47AD-9AFE-30C5490F430D	12	TCGA	2016	YES	Radiofrequency Ablation	Not Applicable	1839	Not Available	1	TCGA-DD-A1E9-A42014	487D20F2-3074-4B10-93BF-D379E4A91665	9	YES	1924	Other	chemoembolic mixture	Chemoembolization	Other, specify	chemoembolic mixture	4	2013	Severe	3.5	4.1	5.0	TCGA-DD-A1E9	8153a862-0790-4a33-80db-ed47fedcd4ef	0.1	13	4	A	0.8	1.3	0.9	10	-25808	2759	0
		No	Yes	No	TCGA-DD-AACM	425.45.0	Nationwide Children's Hospital	22	LIHC	49F8F64F-F874-45C3-B913-00DD972384D0	12	TCGA	2016																			Mild	3.8	4.2	5.3	TCGA-DD-AACM	173088ED-6BC0-4CCF-80E7-C647028CCCD6	0.2	1.6	Not Available	A	0.7	1.5	1.2	29	-17590		0	1769
		No	Yes	No	TCGA-G3-A25W	153.74.0	Nationwide Children's Hospital	22	LIHC	EDF0AB28-866B-49D0-A479-932E54E1D1DC	12	TCGA	2016																			None	0.3	0.4	0.5	TCGA-G3-A25W	06AC44E9-1226-4202-828B-6F224766D7AC	0	0.3	3	A	0.4	1.1	1.5	27	-29018		0	391
		No	Yes	No	TCGA-DD-A3A0	203.73.0	Nationwide Children's Hospital	22	LIHC	64DCCFA8-6616-4A11-A513-831E9468452A	12	TCGA	2016																			None	3.5	3.3	5.0	TCGA-DD-A3A0	AE99D9FD-1735-4217-B4EF-33B377FBD594	0.1	1.4	Not Available	A	0.8	1.2	2.7	5	-25889	785	0
		No	Yes	No	TCGA-DD-AADE	425.45.0	Nationwide Children's Hospital	22	LIHC	D2D3AE47-CBC0-47B1-A11F-30CEF4596CF8	12	TCGA	2016																			Mild	3.8	3.9	5.3	TCGA-DD-AADE	0904FD43-E25C-4D0F-ACEE-29FAA3FD933B	0.2	0.5	Not Available	A	0.7	1.5	1.1	7	-18482		0	918
		No	Yes	No	TCGA-DD-AAE8	425.45.0	Nationwide Children's Hospital	22	LIHC	93F30A76-C99B-49F6-86E0-341D52F9606F	12	TCGA	2016	NO						TCGA-DD-AAE8-A68420	DBFF28C6-BF0D-4E71-B32A-E9AFF7087A66	3	YES	138	Other	adriamycin + Lipiodol	Chemoembolization	Gelfoam	Not Applicable	11	2014	Unknown	3.8	4.3	5.3	TCGA-DD-AAE8	B929ECE7-6CAF-4081-83D3-9923306B4A8A	0.2	3.0	Not Available	A	0.7	1.5	0.6	14	-16549		0	344
[truncated: 165 more columns]
