# Supplementary material for: NamiRNA-mediated high expression of KNSTRN correlates with poor prognosis and tumor immune infiltration of hepatocellular carcinoma
Source: Research Square preprint supplement (doi:10.21203/rs.3.rs-3032233/v1), 2023-06-26
Supplement: Supplementary file 7 [file 980fe2656b93850fbce3789c.xlsx]

## Sheet: Sheet1
Supplementary File.6 Detailed information of NamiRNAs in HCC.
KNSTRN-associated miRNAs	Enhancer-associated miRNAs	Differentially expressed miRNAs
hsa-let-7a-1	hsa-miR-4258	hsa-let-7a-5p
hsa-let-7a-2	hsa-miR-1908	hsa-let-7b-5p
hsa-let-7a-3	hsa-miR-4710	hsa-let-7c-5p
hsa-let-7b	hsa-miR-4519	hsa-let-7d-5p
hsa-let-7c	hsa-miR-21	hsa-let-7e-5p
hsa-let-7d	hsa-miR-4521	hsa-let-7f-5p
hsa-let-7e	hsa-miR-4530	hsa-miR-15a-5p
hsa-let-7f-1	hsa-miR-760	hsa-miR-16-5p
hsa-let-7f-2	hsa-miR-3190	hsa-miR-17-5p
hsa-let-7g	hsa-miR-3191	hsa-miR-17-3p
hsa-let-7i	hsa-miR-4645	hsa-miR-18a-5p
hsa-miR-1-1	hsa-miR-1204	hsa-miR-19a-3p
hsa-miR-1-2	hsa-miR-3153	hsa-miR-19b-3p
hsa-miR-100	hsa-miR-3687	hsa-miR-20a-5p
hsa-miR-101-1	hsa-miR-4477a	hsa-miR-21-5p
hsa-miR-101-2	hsa-miR-4477b	hsa-miR-22-3p
hsa-miR-103-1	hsa-miR-6087	hsa-miR-23a-3p
hsa-miR-103-2	hsa-miR-663a	hsa-miR-24-1-5p
hsa-miR-105-1	hsa-miR-3648	hsa-miR-24-3p
hsa-miR-105-2	hsa-miR-365a	hsa-miR-25-3p
hsa-miR-106a	hsa-miR-3654	hsa-miR-26a-5p
hsa-miR-106b	hsa-miR-4496	hsa-miR-26b-5p
hsa-miR-107	hsa-miR-572	hsa-miR-27a-3p
hsa-miR-10a	hsa-miR-4487	hsa-miR-28-5p
hsa-miR-10b	hsa-miR-142	hsa-miR-29a-3p
hsa-miR-1179	hsa-miR-148a	hsa-miR-30a-5p
hsa-miR-1180	hsa-miR-1234	hsa-miR-30a-3p
hsa-miR-1181	hsa-miR-4505	hsa-miR-32-5p
hsa-miR-1182	hsa-miR-3676	hsa-miR-33a-5p
hsa-miR-1185-1	hsa-miR-4466	hsa-miR-92a-3p
hsa-miR-1185-2	hsa-miR-1282	hsa-miR-93-5p
hsa-miR-1193	hsa-miR-3175	hsa-miR-98-5p
hsa-miR-1197	hsa-miR-155	hsa-miR-99a-5p
hsa-miR-122	hsa-miR-193b	hsa-miR-100-5p
hsa-miR-1224	hsa-miR-4799	hsa-miR-101-3p
hsa-miR-1225	hsa-miR-3939	hsa-miR-29b-3p
hsa-miR-1226	hsa-miR-219-1	hsa-miR-103a-3p
hsa-miR-1227	hsa-miR-4784	hsa-miR-106a-5p
hsa-miR-1228	hsa-miR-623	hsa-miR-107
hsa-miR-1229	hsa-miR-4734	hsa-miR-192-5p
hsa-miR-1231	hsa-miR-5193	hsa-miR-197-3p
hsa-miR-1234	hsa-miR-1207	hsa-miR-199a-5p
hsa-miR-1236	hsa-miR-132	hsa-miR-199a-3p
hsa-miR-1237	hsa-miR-548c	hsa-miR-148a-3p
hsa-miR-1238	hsa-miR-548z	hsa-miR-30c-5p
hsa-miR-124-1	hsa-miR-628	hsa-miR-30d-5p
hsa-miR-124-2	hsa-miR-16-2	hsa-miR-139-5p
hsa-miR-124-3	hsa-miR-4471	hsa-miR-10a-5p
hsa-miR-1243	hsa-let-7a-1	hsa-miR-10b-5p
hsa-miR-1245	hsa-miR-6515	hsa-miR-34a-5p
hsa-miR-1246	hsa-miR-4434	hsa-miR-181a-5p
hsa-miR-1247	hsa-miR-4736	hsa-miR-181b-5p
hsa-miR-1248	hsa-miR-5684	hsa-miR-181c-5p
hsa-miR-1249	hsa-miR-1260b	hsa-miR-182-5p
hsa-miR-1250	hsa-miR-4774	hsa-miR-183-5p
hsa-miR-1251	hsa-miR-612	hsa-miR-203a-3p
hsa-miR-1252	hsa-miR-3193	hsa-miR-210-3p
hsa-miR-1254	hsa-miR-4785	hsa-miR-181a-3p
hsa-miR-1255a	hsa-miR-199a-2	hsa-miR-215-5p
hsa-miR-1256	hsa-miR-5087	hsa-miR-217
hsa-miR-1257	hsa-miR-4435-2	hsa-miR-221-3p
hsa-miR-1258	hsa-miR-4435-1	hsa-miR-222-3p
hsa-miR-125a	hsa-miR-554	hsa-miR-223-3p
hsa-miR-125b-1	hsa-miR-647	hsa-miR-224-5p
hsa-miR-125b-2	hsa-miR-25	hsa-miR-200b-3p
hsa-miR-126	hsa-miR-141	hsa-let-7g-5p
hsa-miR-1260	hsa-miR-6723	hsa-let-7i-5p
hsa-miR-1260b	hsa-miR-1205	hsa-miR-15b-5p
hsa-miR-1262	hsa-miR-4296	hsa-miR-23b-3p
hsa-miR-1263	hsa-miR-200c	hsa-miR-27b-3p
hsa-miR-1264	hsa-miR-93	hsa-miR-30b-5p
hsa-miR-1265	hsa-miR-6073	hsa-miR-122-5p
hsa-miR-1266	hsa-miR-6132	hsa-miR-125b-5p
hsa-miR-1267	hsa-miR-22	hsa-miR-128-3p
hsa-miR-1269	hsa-miR-5093	hsa-miR-130a-3p
hsa-miR-127	hsa-miR-6124	hsa-miR-132-3p
hsa-miR-1270-1	hsa-miR-125b-1	hsa-miR-140-5p
hsa-miR-1270-2	hsa-let-7a-2	hsa-miR-142-5p
hsa-miR-1271	hsa-miR-942	hsa-miR-142-3p
hsa-miR-1272	hsa-miR-3165	hsa-miR-143-3p
hsa-miR-1273c	hsa-miR-193a	hsa-miR-145-5p
hsa-miR-1274b	hsa-miR-4439	hsa-miR-152-3p
hsa-miR-1275	hsa-miR-3619	hsa-miR-191-5p
hsa-miR-1276	hsa-miR-583	hsa-miR-9-5p
hsa-miR-1277	hsa-miR-30a	hsa-miR-125a-5p
hsa-miR-1278	hsa-miR-3973	hsa-miR-126-5p
hsa-miR-128-1	hsa-miR-6070	hsa-miR-126-3p
hsa-miR-128-2	hsa-miR-196b	hsa-miR-127-3p
hsa-miR-1281	hsa-miR-3978	hsa-miR-134-5p
hsa-miR-1283-1	hsa-miR-619	hsa-miR-146a-5p
hsa-miR-1283-2	hsa-miR-2277	hsa-miR-150-5p
hsa-miR-1284	hsa-miR-3199-1	hsa-miR-185-5p
hsa-miR-1285-1	hsa-miR-3199-2	hsa-miR-186-5p
hsa-miR-1286	hsa-miR-218-1	hsa-miR-193a-3p
hsa-miR-1287	hsa-miR-4657	hsa-miR-194-5p
hsa-miR-1288	hsa-miR-3926-1	hsa-miR-195-5p
hsa-miR-1289-1	hsa-miR-3926-2	hsa-miR-320a
hsa-miR-129-1	hsa-miR-648	hsa-miR-200c-3p
hsa-miR-129-2	hsa-miR-378h	hsa-miR-155-5p
hsa-miR-1290	hsa-miR-17	hsa-miR-106b-5p
hsa-miR-1291	hsa-miR-6081	hsa-miR-29c-3p
hsa-miR-1292	hsa-miR-6076	hsa-miR-301a-3p
hsa-miR-1293	hsa-miR-3179-1	hsa-miR-99b-5p
hsa-miR-1294	hsa-miR-3179-2	hsa-miR-130b-3p
hsa-miR-1295	hsa-miR-3179-3	hsa-miR-30e-5p
hsa-miR-1296	hsa-miR-5587	hsa-miR-30e-3p
hsa-miR-1298	hsa-miR-3936	hsa-miR-361-5p
hsa-miR-1301	hsa-miR-4280	hsa-miR-362-5p
hsa-miR-1302-3	hsa-miR-5191	hsa-miR-363-3p
hsa-miR-1303	hsa-miR-3605	hsa-miR-365a-3p
hsa-miR-1304	hsa-miR-1288	hsa-miR-374a-5p
hsa-miR-1305	hsa-miR-4316	hsa-miR-375
hsa-miR-1306	hsa-miR-199a-1	hsa-miR-378a-5p
hsa-miR-1307	hsa-miR-1245a	hsa-miR-378a-3p
hsa-miR-130a	hsa-miR-1245b	hsa-miR-379-5p
hsa-miR-130b	hsa-miR-4757	hsa-miR-381-3p
hsa-miR-132	hsa-miR-5187	hsa-miR-382-5p
hsa-miR-1322	hsa-miR-4761	hsa-miR-340-3p
hsa-miR-1323	hsa-miR-10a	hsa-miR-328-3p
hsa-miR-133a-1	hsa-miR-145	hsa-miR-342-3p
hsa-miR-133a-2	hsa-miR-195	hsa-miR-337-3p
hsa-miR-133b	hsa-miR-301b	hsa-miR-151a-3p
hsa-miR-134	hsa-miR-106b	hsa-miR-148b-3p
hsa-miR-135a-1	hsa-miR-4748	hsa-miR-331-3p
hsa-miR-135a-2	hsa-miR-3649	hsa-miR-324-5p
hsa-miR-135b	hsa-miR-2116	hsa-miR-324-3p
hsa-miR-136	hsa-miR-2682	hsa-miR-338-3p
hsa-miR-137	hsa-miR-137	hsa-miR-339-5p
hsa-miR-138-1	hsa-miR-15b	hsa-miR-335-5p
hsa-miR-138-2	hsa-miR-616	hsa-miR-345-5p
hsa-miR-139	hsa-miR-6077-1	hsa-miR-196b-5p
hsa-miR-140	hsa-miR-6077-2	hsa-miR-423-3p
hsa-miR-141	hsa-miR-4257	hsa-miR-424-5p
hsa-miR-142	hsa-miR-378j	hsa-miR-425-3p
hsa-miR-143	hsa-miR-4493	hsa-miR-20b-5p
hsa-miR-144	hsa-miR-548ac	hsa-miR-450a-5p
hsa-miR-145	hsa-miR-9-1	hsa-miR-451a
hsa-miR-1468	hsa-miR-4425	hsa-miR-452-5p
hsa-miR-146a	hsa-miR-4539	hsa-miR-409-3p
hsa-miR-146b	hsa-miR-4507	hsa-miR-484
hsa-miR-147b	hsa-miR-4537	hsa-miR-486-5p
hsa-miR-148a	hsa-miR-5195	hsa-miR-511-5p
hsa-miR-148b	hsa-miR-625	hsa-miR-146b-5p
hsa-miR-149	hsa-miR-4513	hsa-miR-193b-3p
hsa-miR-150	hsa-miR-5094	hsa-miR-497-5p
hsa-miR-151	hsa-miR-3679	hsa-miR-181d-5p
hsa-miR-152	hsa-miR-4437	hsa-miR-500a-3p
hsa-miR-153-1	hsa-miR-378i	hsa-miR-503-5p
hsa-miR-153-2	hsa-miR-567	hsa-miR-505-3p
hsa-miR-1537	hsa-miR-3945	hsa-miR-532-5p
hsa-miR-1538	hsa-miR-3142	hsa-miR-455-5p
hsa-miR-1539	hsa-miR-4462	hsa-miR-92b-3p
hsa-miR-154	hsa-miR-339	hsa-miR-574-3p
hsa-miR-155	hsa-miR-129-1	hsa-miR-576-5p
hsa-miR-15a	hsa-miR-4659a	hsa-miR-584-5p
hsa-miR-15b	hsa-miR-4659b	hsa-miR-590-5p
hsa-miR-16-1	hsa-miR-766	hsa-miR-598-3p
hsa-miR-16-2	hsa-miR-3202-1	hsa-miR-624-5p
hsa-miR-17	hsa-miR-3202-2	hsa-miR-652-3p
hsa-miR-181a-1	hsa-miR-1184-1	hsa-miR-660-5p
hsa-miR-181a-2	hsa-miR-1184-2	hsa-miR-542-3p
hsa-miR-181b-1	hsa-miR-548f-1	hsa-miR-425-5p
hsa-miR-181b-2	hsa-miR-107	hsa-miR-758-3p
hsa-miR-181c	hsa-miR-92b	hsa-miR-454-3p
hsa-miR-181d	hsa-miR-326	hsa-miR-769-5p
hsa-miR-182	hsa-miR-4422	hsa-miR-766-3p
hsa-miR-1825	hsa-miR-4311	hsa-let-7a-3p
hsa-miR-1827	hsa-miR-3177	hsa-let-7b-3p
hsa-miR-183	hsa-miR-4252	hsa-let-7d-3p
hsa-miR-184	hsa-miR-4729	hsa-miR-16-1-3p
hsa-miR-185	hsa-miR-4743	hsa-miR-19b-1-5p
hsa-miR-186	hsa-miR-5011	hsa-miR-21-3p
hsa-miR-187	hsa-miR-150	hsa-miR-22-5p
hsa-miR-188	hsa-miR-512-1	hsa-miR-24-2-5p
hsa-miR-18a	hsa-miR-519d	hsa-miR-26b-3p
hsa-miR-18b	hsa-miR-4745	hsa-miR-28-3p
hsa-miR-190	hsa-miR-1825	hsa-miR-29a-5p
hsa-miR-1908	hsa-miR-1914	hsa-miR-93-3p
hsa-miR-1909	hsa-miR-548j	hsa-miR-101-5p
hsa-miR-190b	hsa-miR-885	hsa-miR-29b-2-5p
hsa-miR-191	hsa-miR-367	hsa-miR-16-2-3p
hsa-miR-1910	hsa-miR-302d	hsa-miR-192-3p
hsa-miR-1911	hsa-miR-302a	hsa-miR-148a-5p
hsa-miR-1912	hsa-miR-302c	hsa-miR-30c-2-3p
hsa-miR-1913	hsa-miR-302b	hsa-miR-30d-3p
hsa-miR-1914	hsa-miR-146a	hsa-miR-139-3p
hsa-miR-1915	hsa-miR-9-2	hsa-miR-7-1-3p
hsa-miR-192	hsa-miR-548u	hsa-miR-181a-2-3p
hsa-miR-193a	hsa-miR-490	hsa-miR-181c-3p
hsa-miR-193b	hsa-miR-4648	hsa-miR-199b-3p
hsa-miR-194-1	hsa-miR-3674	hsa-let-7g-3p
hsa-miR-194-2	hsa-miR-4288	hsa-let-7i-3p
hsa-miR-195	hsa-miR-600	hsa-miR-15b-3p
hsa-miR-196a-1	hsa-miR-1299	hsa-miR-27b-5p
hsa-miR-196a-2	hsa-miR-4293	hsa-miR-30b-3p
hsa-miR-196b	hsa-miR-675	hsa-miR-140-3p
hsa-miR-197	hsa-miR-3160-1	hsa-miR-143-5p
hsa-miR-1976	hsa-miR-3160-2	hsa-miR-144-5p
hsa-miR-198	hsa-miR-196a-2	hsa-miR-145-3p
hsa-miR-199a-1	hsa-miR-1249	hsa-miR-127-5p
hsa-miR-199a-2	hsa-let-7a-3	hsa-miR-136-3p
hsa-miR-199b	hsa-miR-26a-1	hsa-miR-193a-5p
hsa-miR-19a	hsa-miR-4451	hsa-miR-194-3p
hsa-miR-19b-1	hsa-miR-206	hsa-miR-106b-3p
hsa-miR-19b-2	hsa-miR-29a	hsa-miR-29c-5p
hsa-miR-200a	hsa-miR-589	hsa-miR-99b-3p
hsa-miR-200b	hsa-miR-3914-1	hsa-miR-130b-5p
hsa-miR-200c	hsa-miR-3914-2	hsa-miR-361-3p
hsa-miR-202	hsa-miR-1208	hsa-miR-362-3p
hsa-miR-203	hsa-miR-2278	hsa-miR-374a-3p
hsa-miR-204	hsa-miR-23b	hsa-miR-340-5p
hsa-miR-205	hsa-miR-27b	hsa-miR-330-5p
hsa-miR-206	hsa-miR-3074	hsa-miR-151a-5p
hsa-miR-208a	hsa-miR-24-1	hsa-miR-335-3p
hsa-miR-208b	hsa-miR-374a	hsa-miR-423-5p
hsa-miR-20a	hsa-miR-614	hsa-miR-146b-3p
hsa-miR-20b	hsa-miR-320b-2	hsa-miR-193b-5p
hsa-miR-21	hsa-miR-154	hsa-miR-500a-5p
hsa-miR-210	hsa-miR-377	hsa-miR-501-3p
hsa-miR-211	hsa-miR-4720	hsa-miR-502-3p
hsa-miR-2110	hsa-miR-6504	hsa-miR-505-5p
hsa-miR-2113	hsa-miR-4529	hsa-miR-532-3p
hsa-miR-2114	hsa-miR-935	hsa-miR-455-3p
hsa-miR-2115	hsa-miR-216a	hsa-miR-582-3p
hsa-miR-2116	hsa-miR-580	hsa-miR-589-5p
hsa-miR-2117	hsa-miR-3934	hsa-miR-590-3p
hsa-miR-212	hsa-miR-5690	hsa-miR-625-3p
hsa-miR-214	hsa-miR-1322	hsa-miR-628-5p
hsa-miR-215	hsa-miR-151a	hsa-miR-654-3p
hsa-miR-216a	hsa-miR-4672	hsa-miR-450b-5p
hsa-miR-216b	hsa-miR-126	hsa-miR-874-3p
hsa-miR-217	hsa-miR-505	hsa-miR-744-5p
hsa-miR-218-1	hsa-miR-146b	hsa-miR-744-3p
hsa-miR-218-2	hsa-miR-607	hsa-miR-885-5p
hsa-miR-219-1	hsa-miR-210	hsa-miR-374b-5p
hsa-miR-219-2	hsa-miR-3163	hsa-miR-942-5p
hsa-miR-22	hsa-miR-3675	hsa-miR-1301-3p
hsa-miR-221	hsa-miR-148b	hsa-miR-1180-3p
hsa-miR-222	hsa-miR-18a	hsa-miR-1287-5p
hsa-miR-223	hsa-miR-19a	hsa-miR-664a-3p
hsa-miR-224	hsa-miR-20a	hsa-miR-1307-3p
hsa-miR-2276	hsa-miR-19b-1	hsa-miR-675-3p
hsa-miR-2277	hsa-miR-92a-1	hsa-miR-1976
hsa-miR-2278	hsa-miR-4309	hsa-miR-3065-3p
hsa-miR-2355	hsa-miR-4706	hsa-miR-378c
hsa-miR-23a	hsa-miR-451a	hsa-miR-2355-5p
hsa-miR-23b	hsa-miR-451b	hsa-miR-500b-5p
hsa-miR-23c	hsa-miR-144	hsa-miR-3607-3p
hsa-miR-24-1	hsa-miR-4732	hsa-miR-3613-5p
hsa-miR-24-2	hsa-miR-4726	hsa-miR-3615
hsa-miR-25	hsa-miR-196a-1	hsa-miR-3074-5p
hsa-miR-26a-1	hsa-miR-4524b	hsa-miR-4662a-5p
hsa-miR-26a-2	hsa-miR-4524a	hsa-miR-4677-3p
hsa-miR-26b	hsa-miR-641	hsa-miR-1306-5p
hsa-miR-27a	hsa-miR-1302-10	hsa-miR-1307-5p
hsa-miR-27b	hsa-miR-3618	hsa-miR-365b-3p
hsa-miR-28	hsa-miR-1306	hsa-miR-6511b-3p
hsa-miR-296	hsa-miR-4441
hsa-miR-299	hsa-miR-4766
hsa-miR-29a	hsa-miR-4792
hsa-miR-29b-1	hsa-miR-4276
hsa-miR-29b-2	hsa-miR-378a
hsa-miR-29c	hsa-miR-3662
hsa-miR-301a	hsa-miR-3692
hsa-miR-301b	hsa-miR-4646
hsa-miR-302a	hsa-miR-4658
hsa-miR-302b	hsa-miR-1302-8
hsa-miR-3065	hsa-miR-101-2
hsa-miR-3074	hsa-miR-223
hsa-miR-30a	hsa-miR-548e
hsa-miR-30b	hsa-miR-4256
hsa-miR-30c-1	hsa-miR-135b
hsa-miR-30c-2	hsa-miR-205
hsa-miR-30d	hsa-miR-3122
hsa-miR-30e	hsa-miR-1182
hsa-miR-31	hsa-miR-5700
hsa-miR-3115	hsa-miR-5572
hsa-miR-3116-1	hsa-miR-1276
hsa-miR-3116-2	hsa-miR-2117
hsa-miR-3117	hsa-miR-301a
hsa-miR-3120	hsa-miR-5047
hsa-miR-3121	hsa-miR-4520a
hsa-miR-3124	hsa-miR-4520b
hsa-miR-3125	hsa-miR-133a-1
hsa-miR-3126	hsa-miR-3646
hsa-miR-3127	hsa-miR-4797
hsa-miR-3128	hsa-let-7g
hsa-miR-3129	hsa-miR-575
hsa-miR-3130-1	hsa-miR-3684
hsa-miR-3130-2	hsa-miR-4279
hsa-miR-3131	hsa-miR-587
hsa-miR-3132	hsa-miR-4653
hsa-miR-3133	hsa-miR-550a-1
hsa-miR-3135	hsa-miR-550b-1
hsa-miR-3136	hsa-miR-591
hsa-miR-3137	hsa-miR-3609
hsa-miR-3138	hsa-miR-3170
hsa-miR-3139	hsa-miR-34a
hsa-miR-3140	hsa-miR-3125
hsa-miR-3141	hsa-miR-143
hsa-miR-3143	hsa-miR-30d
hsa-miR-3144	hsa-miR-199b
hsa-miR-3145	hsa-miR-4289
hsa-miR-3146
hsa-miR-3147
hsa-miR-3148
hsa-miR-3149
hsa-miR-3150
hsa-miR-3150b
hsa-miR-3151
hsa-miR-3152
hsa-miR-3153
hsa-miR-3154
hsa-miR-3155
hsa-miR-3156-2
hsa-miR-3156-3
hsa-miR-3157
hsa-miR-3158-1
hsa-miR-3158-2
hsa-miR-3159
hsa-miR-3160-1
hsa-miR-3161
hsa-miR-3162
hsa-miR-3163
hsa-miR-3164
hsa-miR-3165
hsa-miR-3166
hsa-miR-3168
hsa-miR-3170
hsa-miR-3171
hsa-miR-3173
hsa-miR-3174
hsa-miR-3175
hsa-miR-3176
hsa-miR-3177
hsa-miR-3178
hsa-miR-3179-1
hsa-miR-3179-2
hsa-miR-3179-3
hsa-miR-3180-3
hsa-miR-3180-4
hsa-miR-3181
hsa-miR-3183
hsa-miR-3184
hsa-miR-3186
hsa-miR-3187
hsa-miR-3188
hsa-miR-3189
hsa-miR-3190
hsa-miR-3191
hsa-miR-3192
hsa-miR-3193
hsa-miR-3194
hsa-miR-3195
hsa-miR-3196
hsa-miR-3197
hsa-miR-3198
hsa-miR-3199-1
hsa-miR-3199-2
hsa-miR-32
hsa-miR-3200
hsa-miR-3202-1
hsa-miR-3202-2
hsa-miR-320a
hsa-miR-320b-1
hsa-miR-320b-2
hsa-miR-320c-1
hsa-miR-320c-2
hsa-miR-320d-1
hsa-miR-320d-2
hsa-miR-320e
hsa-miR-323
hsa-miR-323b
hsa-miR-324
hsa-miR-325
hsa-miR-326
hsa-miR-328
hsa-miR-329-1
hsa-miR-329-2
hsa-miR-330
hsa-miR-331
hsa-miR-335
hsa-miR-337
hsa-miR-338
hsa-miR-339
hsa-miR-33a
hsa-miR-33b
hsa-miR-340
hsa-miR-342
hsa-miR-345
hsa-miR-346
hsa-miR-34a
hsa-miR-34b
hsa-miR-34c
hsa-miR-3605
hsa-miR-3606
hsa-miR-3607
hsa-miR-3609
hsa-miR-361
hsa-miR-3610
hsa-miR-3611
hsa-miR-3613
hsa-miR-3614
hsa-miR-3615
hsa-miR-3616
hsa-miR-3617
hsa-miR-3618
hsa-miR-3619
hsa-miR-362
hsa-miR-3620
hsa-miR-3621
hsa-miR-3622a
hsa-miR-3622b
hsa-miR-363
hsa-miR-3646
hsa-miR-3647
hsa-miR-3648
hsa-miR-3649
hsa-miR-365-1
hsa-miR-365-2
hsa-miR-3650
hsa-miR-3651
hsa-miR-3652
hsa-miR-3653
hsa-miR-3654
hsa-miR-3655
hsa-miR-3656
hsa-miR-3657
hsa-miR-3658
hsa-miR-3659
hsa-miR-3660
hsa-miR-3661
hsa-miR-3662
hsa-miR-3663
hsa-miR-3664
hsa-miR-3667
hsa-miR-3668
hsa-miR-3672
hsa-miR-3675
hsa-miR-3676
hsa-miR-3677
hsa-miR-3678
hsa-miR-3679
hsa-miR-3680
hsa-miR-3681
hsa-miR-3682
hsa-miR-3684
hsa-miR-3685
hsa-miR-3686
hsa-miR-3687
hsa-miR-3688
hsa-miR-3689a
hsa-miR-3689b
hsa-miR-369
hsa-miR-3690
hsa-miR-3691
hsa-miR-3692
hsa-miR-370
hsa-miR-371
hsa-miR-372
hsa-miR-373
hsa-miR-374a
hsa-miR-374b
hsa-miR-374c
hsa-miR-375
hsa-miR-376a-1
hsa-miR-376a-2
hsa-miR-376b
hsa-miR-376c
hsa-miR-377
hsa-miR-378
hsa-miR-378b
hsa-miR-378c
hsa-miR-379
hsa-miR-380
hsa-miR-381
hsa-miR-382
hsa-miR-383
hsa-miR-3909
hsa-miR-3910-2
hsa-miR-3911
hsa-miR-3912
hsa-miR-3913-1
hsa-miR-3914-1
hsa-miR-3916
hsa-miR-3917
hsa-miR-3918
hsa-miR-3919
hsa-miR-3920
hsa-miR-3921
hsa-miR-3922
hsa-miR-3923
hsa-miR-3924
hsa-miR-3925
hsa-miR-3926-1
hsa-miR-3926-2
hsa-miR-3928
hsa-miR-3929
hsa-miR-3934
hsa-miR-3936
hsa-miR-3937
hsa-miR-3938
hsa-miR-3939
hsa-miR-3940
hsa-miR-3941
hsa-miR-3942
hsa-miR-3943
hsa-miR-3944
hsa-miR-3945
hsa-miR-409
hsa-miR-410
hsa-miR-411
hsa-miR-412
hsa-miR-421
hsa-miR-422a
hsa-miR-423
hsa-miR-424
hsa-miR-425
hsa-miR-4254
hsa-miR-4284
hsa-miR-4286
hsa-miR-429
hsa-miR-4306
hsa-miR-431
hsa-miR-4310
hsa-miR-4315-1
hsa-miR-4315-2
hsa-miR-432
hsa-miR-4320
hsa-miR-4326
hsa-miR-433
hsa-miR-448
hsa-miR-449a
hsa-miR-449b
hsa-miR-449c
hsa-miR-450a-1
hsa-miR-450a-2
hsa-miR-450b
hsa-miR-451
hsa-miR-452
hsa-miR-454
hsa-miR-455
hsa-miR-466
hsa-miR-483
hsa-miR-484
hsa-miR-485
hsa-miR-486
hsa-miR-487a
hsa-miR-487b
hsa-miR-488
hsa-miR-489
hsa-miR-490
hsa-miR-491
hsa-miR-493
hsa-miR-494
hsa-miR-495
hsa-miR-496
hsa-miR-497
hsa-miR-498
hsa-miR-499
hsa-miR-500a
hsa-miR-500b
hsa-miR-501
hsa-miR-502
hsa-miR-503
hsa-miR-504
hsa-miR-505
hsa-miR-506
hsa-miR-507
hsa-miR-508
hsa-miR-509-1
hsa-miR-509-2
hsa-miR-509-3
hsa-miR-510
hsa-miR-511-1
hsa-miR-511-2
hsa-miR-512-1
hsa-miR-512-2
hsa-miR-513a-1
hsa-miR-513a-2
hsa-miR-513b
hsa-miR-513c
hsa-miR-514-1
hsa-miR-514-2
hsa-miR-514-3
hsa-miR-514b
hsa-miR-515-1
hsa-miR-515-2
hsa-miR-516a-1
hsa-miR-516a-2
hsa-miR-516b-1
hsa-miR-516b-2
hsa-miR-517a
hsa-miR-517b
hsa-miR-517c
hsa-miR-518a-1
hsa-miR-518a-2
hsa-miR-518b
hsa-miR-518c
hsa-miR-518d
hsa-miR-518e
hsa-miR-518f
hsa-miR-519a-1
hsa-miR-519a-2
hsa-miR-519b
hsa-miR-519c
hsa-miR-519d
hsa-miR-519e
hsa-miR-520a
hsa-miR-520b
hsa-miR-520c
hsa-miR-520d
hsa-miR-520e
hsa-miR-520f
hsa-miR-520g
hsa-miR-520h
hsa-miR-521-1
hsa-miR-521-2
hsa-miR-522
hsa-miR-523
hsa-miR-524
hsa-miR-525
hsa-miR-526a-1
hsa-miR-526a-2
hsa-miR-526b
hsa-miR-527
hsa-miR-532
hsa-miR-539
hsa-miR-541
hsa-miR-542
hsa-miR-543
hsa-miR-544
hsa-miR-544b
hsa-miR-545
hsa-miR-548a-3
hsa-miR-548aa-2
hsa-miR-548b
hsa-miR-548d-1
hsa-miR-548d-2
hsa-miR-548e
hsa-miR-548f-1
hsa-miR-548f-4
hsa-miR-548j
hsa-miR-548k
hsa-miR-548l
hsa-miR-548n
hsa-miR-548o
hsa-miR-548p
hsa-miR-548q
hsa-miR-548s
hsa-miR-548t
hsa-miR-548u
hsa-miR-548v
hsa-miR-548w
hsa-miR-548x
hsa-miR-548y
hsa-miR-549
hsa-miR-550a-1
hsa-miR-550a-2
hsa-miR-550b-1
hsa-miR-550b-2
hsa-miR-551a
hsa-miR-551b
hsa-miR-552
hsa-miR-555
hsa-miR-556
hsa-miR-559
hsa-miR-561
hsa-miR-564
hsa-miR-568
hsa-miR-570
hsa-miR-572
hsa-miR-573
hsa-miR-574
hsa-miR-576
hsa-miR-577
hsa-miR-578
hsa-miR-579
hsa-miR-580
hsa-miR-581
hsa-miR-582
hsa-miR-584
hsa-miR-585
hsa-miR-586
hsa-miR-588
hsa-miR-589
hsa-miR-590
hsa-miR-592
hsa-miR-597
hsa-miR-598
hsa-miR-599
hsa-miR-600
hsa-miR-602
hsa-miR-603
hsa-miR-605
hsa-miR-606
hsa-miR-607
hsa-miR-609
hsa-miR-610
hsa-miR-611
hsa-miR-612
hsa-miR-613
hsa-miR-615
hsa-miR-616
hsa-miR-617
hsa-miR-618
hsa-miR-621
hsa-miR-622
hsa-miR-623
hsa-miR-624
hsa-miR-625
hsa-miR-627
hsa-miR-628
hsa-miR-629
hsa-miR-630
hsa-miR-631
hsa-miR-632
hsa-miR-635
hsa-miR-636
hsa-miR-637
hsa-miR-639
hsa-miR-641
hsa-miR-642a
hsa-miR-642b
hsa-miR-643
hsa-miR-647
hsa-miR-651
hsa-miR-652
hsa-miR-653
hsa-miR-654
hsa-miR-655
hsa-miR-656
hsa-miR-657
hsa-miR-658
hsa-miR-659
hsa-miR-660
hsa-miR-663
hsa-miR-663b
hsa-miR-664
hsa-miR-665
hsa-miR-668
hsa-miR-670
hsa-miR-671
hsa-miR-675
hsa-miR-676
hsa-miR-7-1
hsa-miR-7-2
hsa-miR-7-3
hsa-miR-708
hsa-miR-718
hsa-miR-720
hsa-miR-744
hsa-miR-758
hsa-miR-760
hsa-miR-765
hsa-miR-766
hsa-miR-767
hsa-miR-769
hsa-miR-770
hsa-miR-802
hsa-miR-873
hsa-miR-874
hsa-miR-875
hsa-miR-876
hsa-miR-877
hsa-miR-885
hsa-miR-887
hsa-miR-888
hsa-miR-889
hsa-miR-890
hsa-miR-891a
hsa-miR-891b
hsa-miR-892a
hsa-miR-892b
hsa-miR-9-1
hsa-miR-9-2
hsa-miR-9-3
hsa-miR-922
hsa-miR-92a-1
hsa-miR-92a-2
hsa-miR-92b
hsa-miR-93
hsa-miR-933
hsa-miR-934
hsa-miR-935
hsa-miR-937
hsa-miR-938
hsa-miR-939
hsa-miR-940
hsa-miR-941-1
hsa-miR-942
hsa-miR-943
hsa-miR-944
hsa-miR-95
hsa-miR-96
hsa-miR-98
hsa-miR-99a
hsa-miR-99b
