# Supplementary material for: NamiRNA-mediated high expression of KNSTRN correlates with poor prognosis and tumor immune infiltration of hepatocellular carcinoma
Source: Research Square preprint supplement (doi:10.21203/rs.3.rs-3032233/v1), 2023-06-26
Supplement: Supplementary file 8 [file b00ca16ddb7b5b589d1482f7.xlsx]

## Sheet: Sheet 1
Supplementary File.3 The overlapping genes of the KNSTRN-related genes and DEGs.
Only DEGs	Only KNSTRN-related genes	DEGs AND KNSTRN-related genes
TNMD	ABCC5	E2F2
CYP26B1	ABHD3	NCAPD2
SLC4A1	ACIN1	ANLN
CALCR	ACOT11	GABRA3
PRSS22	ACTL6A	BRCA1
HOXA11	ACYP1	DEPDC1
ITGA3	ADAMTS6	DEPDC1B
ASB4	ADAT2	C6
TMEM132A	ADPGK	DSG2
TAC1	ALS2CR4	RAD51
DLX6	AMIGO3	POLQ
CCL26	ANAPC7	CBLN4
LGALS14	ANKLE1	MCM10
SCIN	ANKLE2	ASPM
PRSS21	ANKRD23	PRR11
PROM1	ANKRD32	TRIP13
SLC13A2	ANKRD36	HMMR
CEACAM7	ANP32E	MCM2
TKTL1	AP4E1	GTSE1
SELE	APAF1	WDR62
TFAP2B	ARHGAP19	SPAG5
MASP2	ARHGAP33	SMC1B
GIPR	ARID3B	RBL1
SLC6A13	ARL6IP6	NDC80
FMO1	ATAD2	RAD54L
ISL1	ATPBD4	DNMT3B
IL20RA	ATXN2L	TPX2
CLCA1	AURKAPS1	BIRC5
CYP24A1	AURKA	KIF4A
PLEKHB1	AZI1	WDR76
NLRP2	BAGE	CLSPN
IBSP	BRD9	CDC45
MYOC	BRI3BP	CDC6
CDH10	BRIP1	CDC7
RAB27B	BRIX1	MAGEB2
TG	BRPF1	CENPM
BARX2	BUB3	DMC1
ADRB1	C10orf78	CDKN3
ANO2	C11orf82	GINS1
COL9A2	C11orf84	MYBL2
EPN3	C12orf24	SALL4
DKK3	C12orf32	E2F1
COL23A1	C12orf48	CENPI
METTL24	C12orf65	OIP5
MCF2L2	C13orf23	RNASEH2A
KCNH2	C13orf34	ASF1B
MCOLN3	C13orf37	CCNE1
ITIH4	C14orf106	ZNF85
PHF21B	C14orf143	EZH2
SERPINB3	C14orf145	MPP2
LAMC2	C14orf80	NEIL3
RASGRF1	C15orf21	NCAPG
STYK1	C15orf23	FOXM1
RIMBP2	C15orf42	RAD51AP1
COL11A1	C16orf59	CDCA3
SEZ6	C16orf75	FBXO5
ATP2C2	C17orf53	PACRG
SNAP91	C17orf80	TTK
CTNNA2	C18orf10	MEP1A
CLDN18	C18orf45	C7
PKM	C19orf40	KIF20A
STON1-GTF2A1L	C19orf47	LMNB1
PAGE1	C1orf106	SMC4
PITX1	C1orf135	ECT2
TRPC7	C1orf84	CENPA
TRPM5	C1orf96	OTX1
SLC6A15	C20orf72	CDC20
SPEG	C21orf45	NEK2
TRHDE	C2orf48	CENPF
CYP2W1	C3orf26	KIF14
SLC12A1	C3orf34	MYB
SEMA3A	C4orf21	ELOVL3
FGF4	C4orf46	HELLS
ATP12A	C5orf22	CENPL
CAPN6	C5orf34	NCAPH
SPAG6	C5orf54	KIF18A
ACTN2	C5orf58	GPSM2
NEBL	C6orf147	RAMP3
RBFOX1	C6orf167	ZWINT
TP73	C6orf182	CIT
CDH17	C7orf36	CENPK
EPHA6	C9orf100	STIL
SCTR	C9orf140	HJURP
C1QTNF3	C9orf53	C4BPA
KCNK2	CABLES2	SSX1
TRPM3	CASC5	DLGAP5
GRHL2	CASP2	CTAG2
EPYC	CBFA2T2	PKMYT1
SLC27A5	CBX1	RIBC2
KIF3C	CCDC138	E2F8
ORC1	CCDC14	SULT4A1
AQP6	CCDC150	CYP2E1
CEACAM6	CCDC163P	POLN
CETP	CCDC18	PSMC3IP
PTHLH	CCDC21	TOP2A
SULT2B1	CCDC34	SLC14A2
NOS1	CCDC41	CCNB1
FXYD3	CCDC43	CFHR4
SI	CCDC45	CDCA8
DLL3	CCDC66	ACRV1
ORC6	CCDC77	KHDC1
CPA1	CCDC84	TROAP
ESR1	CCDC88A	ESPL1
CMA1	CCDC99	HTR2B
SEMA6A	CCT5	IGF2BP3
TDRD1	CDAN1	TCF19
CRTAC1	CDC14A	KIF23
IL11	CDC25B	SLC44A5
MYO3A	CDCA4	KIF11
ITPR3	CDK16	CEP55
MISP	CDK2	KIF20B
SEC14L2	CDK4	TET1
SEZ6L	CDKN2A	BARD1
PNPLA5	CDKN2BAS	MNS1
CACNA1I	CDKN2C	CENPE
UPK3A	CDKN2D	GAS2L3
KCNK10	CDT1	BRCA2
CTSG	CELSR3	PIF1
GSTZ1	CENPH	FANCI
CHGA	CENPJ	PLK4
CPNE6	CENPO	KIF2C
BMP7	CENPQ	IGSF3
CHRNA4	CENPW	NUF2
EEF1A2	CEP135	DTL
ANGPT4	CEP152	FANCD2
PDYN	CEP250	CCNA2
PAK5	CEP72	CDH18
CST4	CEP78	CRHBP
SPINT3	CHAF1A	ZNF300
CELF4	CHEK2	CDCA5
VSIG1	CHML	NCAPG2
PAGE4	CHORDC1	IGSF1
F9	CHTF18	GINS4
PLP2	CIDECP	MKI67
LUZP4	CKAP2	INCENP
PHEX	CKAP5	CHEK1
PCYT1B	CKS2	CDH22
DRP2	CLCN2	SPC25
KLF5	CLN6	SPARCL1
SGCG	CNGB3	CDH12
OLFM4	CNOT10	PGM5
DHODH	CNOT3	SKA1
FA2H	CNTNAP4	EME1
ZP2	COIL	NAA11
SLC6A2	COMMD2	FBXO43
AQP9	COX7B2	BUB1B
IGDCC4	CPSF6	CCNB2
OCA2	CRLF3	SLC13A3
SCG3	CSAG2	CDC25C
RHOV	CSAG3	CHAF1B
MYEF2	CSE1L	ISL2
EYA1	CSMD1	C21orf58
ESRP1	CSTF2	ZNF714
NEFM	CTAG1B	CYP3A4
FGL1	CUZD1	RACGAP1
KLC3	CWC27	CCNF
AMH	CXorf48	PAQR4
CLEC4M	CXorf61	LMX1A
TNNT1	DAZAP1	DNASE1L3
SLC1A5	DBF4B	KIF15
APLP1	DBF4	CLEC3B
ETFB	DCLRE1B	CDC25A
CEACAM5	DCLRE1C	MAD2L1
ATP4A	DDX11	RANBP3L
HAMP	DDX12	TERT
ITGB8	DDX39	CDCA7L
DLX5	DDX55	MELK
STEAP1B	DEK	CLDN2
ATP6V0A4	DEM1	HEPACAM
ADAP1	DHDH	SKA3
HOXA6	DIAPH3	RPL10L
ANKRD7	DLEU2L	SSX5
EPHB6	DLEU2	E2F7
HYAL4	DNA2	TMEM100
AGR2	DNAJC9	LDHD
OGN	DNMT1	C18orf54
RLN2	DONSON	PLK1
CA9	DPF2	TMEM88
LHX3	DR1	PBK
DNTT	DSCC1	FAM178B
CDH23	DSCR4	FSTL5
DKK1	DSN1	ATOH8
SORCS1	DTYMK	VCX3A
CSF3	DVL3	KCNK9
SEPTIN4	DYNC1LI1	CKAP2L
ALDH3A1	E2F6	BUB1
MYH3	EDC3	ADRA1B
FOXN1	EPB41L2	CDK1
ODAM	EPPK1	SHCBP1
SMR3A	EPR1	ESCO2
NMU	EWSR1	COL24A1
UCP1	EXOG	RRM2
NKX3-2	EXOSC2	ZNF738
GLRB	EXOSC3	SLCO4C1
HGFAC	FADS1	EXO1
NRXN2	FAM111A	UBE2C
CCKBR	FAM119A	CCNE2
HPX	FAM133A	ATAD5
FOLR1	FAM24B	ACBD7
APOA4	FAM40B	KBTBD11
KIAA1549L	FAM54A	TYMS
SLC35F2	FAM57B	AURKB
CALCA	FAM5C	GPC5
ADGRD1	FAM64A	MKRN3
SLCO1B3	FAM71D	APOBEC3B
APOBEC1	FAM83D	DDN
RFX4	FANCA	FANCB
UST	FANCE	RTKN2
TULP1	FANCG	VCX
IL17F	FANCM	NEB
PRDM13	FBXO45	COLEC10
HDGFL1	FEN1	KNTC1
EYA4	FIGNL1	ZNF93
ENPP5	FLJ46321	CDCA2
PRSS16	FOXD2	MAGEA11
TBX18	FOXK2	C12orf56
CDH9	FSD1L	KIF18B
PCDHB6	FUS	KIF24
HAVCR1	G2E3	ERCC6L
CDH6	GABPB1	TCL6
AGXT2	GEN1	LIN28B
C9	GINS2	LCTL
RBP2	GINS3	FAM72B
RBP1	GLB1L3	FAM111B
C3orf52	GMPS	FAM180A
VIPR1	GPD2	ZNF681
POMC	GPN3	ZNF107
ITGB6	GPR120	FAM72A
TLX2	GPR137C	XRCC2
REG1A	GPR19	ADH1B
SLC9A2	GPRC5D	ZNF257
DLX2	GRK6	BLM
NPHS2	GSG2	ZNF98
CTH	GTF3C2	ZNF695
CFHR3	GTSF1	TUBA3C
ST6GALNAC5	H1FX	DSCR8
MFAP2	H2AFX	WDHD1
ACTL8	H2AFY	ARHGAP11A
TNFSF4	H2AFZ	PRC1
HSD11B1	HAT1	RHOXF2B
PLPPR5	HAUS1	SLCO6A1
A4GNT	HAUS2	CFI
TNNT2	HAUS3	TRIM59
ELOVL4	HAUS5	MAGEB1
CNR1	HAUS6	UBE2QL1
SPACA1	HAUS8	FAM72D
ADGB	HERC2P2	RAET1K
GHRH	HIC2	ELFN1
BSPRY	HIST1H1B	DCAF8L1
CSF3R	HIST1H1E	KIF4B
BCL11A	HIST1H2BO	ZNF492
EPCAM	HIST1H3C	CLEC2L
PYROXD2	HIST1H4E	CT47B1
SFRP5	HMGB2	KIFC1
INSL6	HMGN2	SSX2
INSL4	HNRNPA2B1	INMT
GRIA2	HNRNPA3P1	CARD18
PCDHB8	HNRNPA3	RNASE4
TEX11	HNRNPD	UHRF1
SOHLH2	HNRNPH1	ARHGAP11B
DUSP4	HNRNPL
PRAMEF2	HNRNPR
AL139327.1	HNRNPU
RGSL1	HSF2
ADGRB2	HSPA14
HPCA	HYLS1
PTGFR	IFT80
SPINK4	IKBIP
SFTPA1	IL12A
BICC1	IL1F7
GUCY1B2	ILF3
ITIH5	INTS4
HOXC13	IP6K2
TNFAIP6	IQCB1
ARHGAP40	IQCC
RBPJL	IQGAP3
MAGEA10	ITGB3BP
POF1B	KATNA1
CEACAM8	KCNMB3
NDP	KCTD6
PACSIN1	KHDC1L
ZNF391	KHDRBS1
SPDEF	KIAA0101
KCNK17	KIAA0406
EREG	KIAA0907
SCGB2A1	KIAA1009
MT1G	KIAA1239
MT2A	KIAA1524
SOX21	KIAA1731
HROB	KIAA1841
MYH2	KIN
IL37	KLHL17
NKX2-2	KPNA2
OVOL2	KPNA7
LAMP5	L3MBTL
GRPR	LEO1
KIRREL2	LEPRE1
IFI6	LIG1
TMEM35A	LIN9
NXF5	LMNB2
BEST3	LOC100128191
TRPV5	LOC100133469
AUNIP	LOC100286793
SYNGR3	LOC127841
STEAP4	LOC145783
GAL3ST1	LOC146880
STRIP2	LOC256880
FEZF1	LOC339535
HOXD1	LOC339674
GAD1	LOC374443
HOXD11	LOC388152
HOXD13	LOC399815
MYOD1	LOC401052
TPH1	LOC440173
PIMREG	LOC440944
AIPL1	LOC441666
EGLN3	LOC642846
FOXJ1	LOC647121
SGO1	LOC647946
CDH15	LOC729082
APOC1	LOC81691
FCHO1	LRDD
UNC13A	LRP11
MNX1	LRRC1
RBBP8NL	LRRC37B
FIBCD1	LRRC57
SMPDL3B	LRRC59
PNCK	LSM14B
DUSP9	LY6G5B
SLC7A10	MAGEA2
EPS8L1	MAGEA3
CCL25	MAGEA6
RHOXF2	MAGEA9B
PPP1R1B	MAPKAPK5
FTHL17	MAPKBP1
REEP2	MAST2
SNAP25	MASTL
RHBG	MCM3
CRP	MCM4
RAB25	MCM5
APCS	MCM6
ALDH3B2	MCM7
RNF17	MCM8
CHI3L1	MDC1
LGR6	MESDC1
BEX1	MESP2
ZDHHC8P1	METTL4
NTS	METTL6
LRRIQ1	MGC12982
TEX15	MICB
GSC	MITD1
PEBP4	MKRN2
ADAMDEC1	MLF1IP
REG4	MND1
VTCN1	MRE11A
SAA2	MSH2
ERN2	MSH5
FOLH1B	MSH6
PIWIL4	MST4
MTNR1B	MTBP
DSG1	MTF2
DSC3	MTMR7
FHOD3	MUS81
TCN1	MXD3
CCNJL	MYBL1
CSN2	MYO19
UGT2B28	NAA40
EHF	NAP1L6
KCNH3	NASP
CHST5	NCAPD3
ZNF670-ZNF695	NCAPH2
GLUL	NCRNA00164
CHRND	NCRNA00183
PAX3	NCRNA00189
STAB2	NDE1
USP44	NEDD1
BORA	NFKBIL2
RPL13AP25	NPC1
NKX2-8	NPFFR2
TBR1	NRAS
GALNT5	NRM
GAD2	NUDT1
WDR38	NUP107
GABBR2	NUP155
CTSV	NUP188
DMRT1	NUP205
ARHGEF39	NUP210
TFAP2A	NUP35
CLPS	NUP37
TMPRSS4	NUP43
FXYD2	NUP85
MMP13	NUPL2
TMPRSS13	NUSAP1
CASP5	OBFC2B
PAK6	OR56A3
DUOX1	ORC1L
STRA6	ORC3L
CYP19A1	ORC6L
BRDT	OTUD3
SIX3	PA2G4P4
CYP2C9	PA2G4
ZNF365	PABPC1L
AOX1	PALB2
HCN4	PARP2
NDST4	PASK
FGF5	PCNA
IL21	PDCD7
FRAS1	PDE7A
ANXA3	PDIA3P
EGF	PDK3
COL2A1	PDSS1
PTPRQ	PFKFB4
FOXN4	PGS1
PDX1	PHF19
RDH16	PHF5A
GPR84	PI4KAP1
SMIM2	PKN3
ZIC5	PLAGL2
SYT16	PLCB1
KCNH5	PLOD2
SLC25A47	PM20D2
DUOXA1	POC1A
DUOXA2	POC5
DUOX2	POLA1
GCNT3	POLA2
CYP1A1	POLD1
CCDC33	POLD3
CYP1A2	POLE2
RHCG	POLE3
TICRR	POLE
SH3GL3	POLR2D
PRELID3A	PPHLN1
TNFRSF11A	PPIL5
PMAIP1	PPP1CC
FKBP10	PRELID2
HUNK	PRIM1
C1orf94	PRIM2
FCN3	PRKCD
TMEM61	PRKCI
DMRTB1	PRPF38A
PROK1	PRRT2
RXRG	PSIP1
MAEL	PSRC1
DPT	PTBP1
NECTIN4	PTPN23
HORMAD1	PTTG1
AQP10	PTTG2
REN	PTTG3P
PPFIA4	QSER1
ABHD1	RAB42
DQX1	RACGAP1P
NT5DC4	RAD18
NXPH2	RAD1
CDCA7	RAD21
DLX1	RAD51C
GULP1	RAD54B
CPO	RAD9A
ABCA12	RAD9B
GADL1	RAF1
TAGLN3	RAN
NCEH1	RBBP7
SPATA16	RBBP8
AC062028.1	RBM12B
ILDR1	RBM14
EPHA5	RBM15B
ADAMTS16	RBM17
SHISAL2B	RBM19
LIX1	RCAN3
CXCL14	RCC1
TENM2	RCC2
GFRA3	RDM1
CYP39A1	RECQL4
MMS22L	REEP4
FAXC	RFC2
GABRR1	RFC3
CLVS2	RFC4
MTFR2	RFC5
VWDE	RFWD3
ZC3HAV1L	RHEBL1
RAB19	RMI1
ZNF711	RNASEN
RIPPLY1	RNF26
RADX	RNF34
HTR2C	RNF8
ARHGAP36	RNFT2
GPR119	RPSAP9
MAGEA4	RQCD1
CHRNB3	RRM1
STAR	RSRC1
SNTG1	RUSC1
ADHFE1	S100PBP
RSPO2	SAAL1
FAM83A	SAE1
ANKRD30A	SAP30
VAX1	SART3
PLEKHS1	SASS6
NKX6-2	SCARNA12
SLC5A12	SCLT1
SCGB1A1	SCMH1
SYT8	SCML2
GLYAT	SENP1
GLB1L2	SENP5
SLC22A8	SETD8
ZP1	SET
TLCD3B	SF3B4
DOC2A	SFPQ
HMGA2	SFRS13A
CNTN5	SFRS13B
PCDH15	SFRS1
LYPD6B	SFRS2
GPM6A	SFRS7
C11orf53	SFRS8
C2orf50	SFRS9
TKTL2	SGK494
LYZL2	SGOL1
ATP6V1G3	SGOL2
CENPU	SIP1
ZNF385D	SKA2
GABRA2	SKP2
TMEM132D	SLBP
CCDC74B	SLC25A19
TUBA3E	SLC26A6
GRID2	SLC36A1
BOLL	SLMO2
PLEKHH2	SMARCD1
IGSF10	SMC2
ANKRD22	SMPD4
PART1	SNHG1
CLGN	SNRPA1
ADGRF4	SNRPA
FRMD1	SNRPB
PLEKHG4B	SNRPD1
TGIF2LX	SNRPF
ANKFN1	SNRPG
PANX3	SPATS2L
UCHL1	SPATS2
CNTNAP3B	SPC24
CHODL	SR140
TMPRSS15	SRRT
SLFN13	SSRP1
SEPTIN14	SSX4
CNTNAP5	SSX6
PROM2	STIP1
TRIM74	STMN1
XAGE2	STX16
SPAG17	SUV39H1
FMN2	SUV39H2
ADCY8	SUV420H2
RAET1L	SUZ12P
KIF5A	SUZ12
NAT2	SYCE2
MAGEA8	SYT1
ALX3	TACC3
SORCS3	TAF1B
TDRD9	TAF4
PPP2R2B	TAF5
UNC5D	TCERG1
GLYATL2	TCF7L1
MAPK13	TCOF1
SST	TDG
C8A	TDRKH
LRP8	THOC1
C1orf158	THOC4
HYDIN	TIGD7
FAM81A	TIMELESS
PWWP3B	TIPIN
KCNJ6	TK1
SVOPL	TMEM106C
SLC34A2	TMEM189
GAREM2	TMEM194A
DPYSL5	TMEM194B
SLC30A2	TMEM201
TRIM63	TMEM48
HPD	TMEM97
DZIP1L	TMPO
CPA2	TMPPE
DYNC1I1	TOPBP1
PAGE5	TPRKB
SV2A	TRA2B
HOXB13	TRAF2
PLA2G4D	TRAIP
TFF2	TRIM31
TFF1	TRIM45
TMPRSS3	TRIP4
ZNF66	TTF2
FTCD	TUBA1B
ZNF208	TUBA1C
FCN2	TUBB
TMEM190	TUBG1
NLRP4	U2AF1
LY6K	UBA2
PTGER1	UBE2CBP
SCGB3A1	UBE2E1
KASH5	UBE2N
CD300LG	UBE2S
BICDL2	UBE2T
ZG16B	UBXN2A
CYP4A22	UCK2
BSND	UNK
RAVER2	USP1
AKR7A3	USP39
LHX8	UTP18
B3GALT2	UTP6
BRINP3	VPS29
VANGL2	VRK1
LRRC52	WASF1
TDRD5	WDR53
MT2P1	WDR67
KLHDC8A	WHSC1
C1orf147	XAGE1D
TRIM17	XPO1
LINC01931	XRCC1
CAPN13	XRCC3
FBXO41	YEATS2
SGPP2	ZBTB12
XIRP2	ZCCHC3
SPRR2D	ZCCHC8
BMP10	ZMYM1
PGLYRP4	ZMYND10
TGFA	ZMYND19
INAVA	ZNF138
IGFN1	ZNF195
ADORA1	ZNF207
CIP2A	ZNF215
FBLN2	ZNF248
SGO2	ZNF26
CADPS	ZNF273
NKX6-1	ZNF335
CXCL3	ZNF341
CXCL5	ZNF367
PPBP	ZNF37B
CXCL1	ZNF384
CDCP1	ZNF431
LIPH	ZNF48
CLDN19	ZNF519
MST1R	ZNF589
PITX2	ZNF620
PRSS12	ZNF639
NDST3	ZNF643
TMEM155	ZNF682
ADAD1	ZNF765
ELOVL7	ZNF792
ANKRD33B	ZNF826
SCGB3A2	ZNF883
ENPP6	ZSCAN20
LINC01600	ZSCAN29
ADGRF2	ZWILCH
GJB7	ABCA8
GRIK2	ABHD14B
BMPER	ACADVL
SP8	ACAT1
SUN3	ACYP2
SLC30A8	ADI1
KCNV1	ALDH2
CSMD3	ALDH4A1
DEFA5	ATP6V0A1
BAALC	ATP6V0E2
FREM1	BCKDHA
NKX6-3	BLCAP
TRPV6	BOK
LLCFC1	C10orf72
SHOC1	C17orf103
ASB11	C20orf160
VEGFD	C4orf3
WNK2	CABC1
SLITRK5	CBFA2T3
ARMC3	CCDC48
DEUP1	CCL14
MBL2	CDADC1
DDIAS	CDC14B
MAGEC3	CDC37L1
NGB	CDNF
CDX2	CHURC1
CLEC1B	CLEC14A
STOX1	CLYBL
VWA2	COQ4
SALL2	CPT2
PRAP1	CUX1
LARGE2	CYB5D2
IFI27	CYGB
PDZRN4	CYYR1
SLC6A5	DHRS12
NELL1	DISP1
PASD1	DLC1
SPINT1	DNAJC30
GABRB3	ECM2
RAG1	EFCAB6
MOGAT2	EMCN
SERPINB7	ENG
TMEM130	ERMAP
SLC38A8	ETFDH
MMP10	EXOC3L2
HTR3A	FAM167B
NNMT	FAM43A
GLYATL1	FBXO31
GPR182	FHL2
TAC3	FXN
CHP2	FXYD6
MIR202HG	GABARAPL1
C15orf48	GALNTL2
EPB42	GNA14
MS4A8	GNG7
MS4A15	GPR155
TCP10L2	GRHPR
TERB2	HERPUD1
B4GALNT2	HGD
ANKRD40CL	HIBADH
PRR15L	HMOX2
ART5	IL13RA1
OR51B5	ISCU
CA4	KCTD21
ZNF610	KIAA0664
TMC4	LMF1
ANKRD33	LMOD1
TTYH1	LOC283070
GGT6	LOC399959
KLK4	LYPLAL1
KLK11	MDH2
KRT80	MLYCD
KRT1	MMAA
ACER1	MMRN2
RCOR2	MRPL44
C3P1	MSRA
EVPL	MYOM2
DNASE1L2	NDUFA10
CASKIN1	NPR1
ENTPD3	PARK2
NAALADL1	PDE2A
SCARA5	PEX11G
OR2W6P	PHLDA1
FAM83B	PINK1
PTF1A	PNPO
FOXI1	PPA2
SFTPC	PPAP2A
MTCL1	PTH1R
CHRM1	RASIP1
DYNLRB2	RDH5
UGT3A2	ROBO4
KCTD19	RPH3AL
NPNT	SAT1
SHOX2	SCO1
SOX14	SEPT4
SFTPB	SH3RF3
PLA2G4F	SHC2
GRM5	SLC23A2
OR7E102P	SLCO2A1
ATP5ME	SPATA18
ZBBX	SPNS2
ACTBL2	SRGAP3
GSG1L	SRL
IL13	SUCLG2
HSPB3	TAPT1
NR0B1	TBCK
GUSBP12	TCEAL1
GP2	TCF25
RNASE2	THSD1
ZNF280A	TIMP3
MUC15	TK2
CT55	TMEM233
CLIC3	TSC22D1
PROKR1	TSPAN31
GP9	TTC38
MT1E	VAMP2
DCXR	VWF
NLGN1	ZBTB7C
TACR3	ZCCHC24
CTNND2
AHSP
ZPLD1
FAM153A
VGLL2
HOXD12
FABP6
FABP4
FRMPD2
SEMA3E
ZNF804A
KRT75
KRT4
SIX2
HOXB9
TTLL6
BFSP2
GPR27
TRH
PGK2
ZNF415
PLAC1
HS6ST2
PKIA
KCNG3
RLN3
OPRPN
SMR3B
CSN3
CDC42BPG
LRG1
SOSTDC1
NPTX1
KRT19
KCND3
XAGE5
KRT20
KSR2
KRT27
CDK5R2
SSX6P
ECEL1
ZIK1
ANGPTL7
ADRA1D
FRMD5
ZNF556
REG3A
REG1B
FRMD3
PRL
TPSAB1
ATOH1
PDZD3
ARNT2
TTC36
FUT9
MUCL1
CCL19
ADH6
EVC2
RXFP4
ADAMTS20
DMRT2
SAA1
AGR3
SULT1B1
GPRC6A
PIFO
TLR10
NWD2
SLC16A11
CHRNA9
SLC6A19
LINGO2
IGDCC3
SLC26A9
UGT8
SLC66A1L
CD164L2
CA5A
TMEM51-AS1
FAM182B
PPM1E
APOF
DPP10
RMI2
LRRN1
TMPRSS7
FOXG1
SPHK1
LRRTM4
AC104129.1
B3GNT5
TGIF2LY
C15orf56
TCERG1L
BASP1
TRIM60
ZDHHC22
AC024940.1
UBE2U
OLIG3
VCX2
ST8SIA3
RPRM
NHLH2
HASPIN
MBOAT4
MAGEB10
SPATA31C2
LCN15
TMEM151B
SLITRK1
FAM230I
CCDC185
TUBAL3
UCN3
AMBN
RNF186
CYP11B2
ALOXE3
TMEM125
NSUN7
ALOX12B
ARL14
MRGPRX3
ZNF648
LINC02870
FAR2P1
SLC9A4
ALX1
EMC3-AS1
CYP8B1
ARSJ
LINC01559
CHRM2
ADIPOQ
PENK
TMEM132C
OFCC1
UTS2R
SAGE1
GLRX5P1
MAB21L2
EDDM3A
C6orf223
FDCSP
ANKRD62
GPR88
TMEM252
CELF2-AS1
AQP7P2
ADIG
USH1G
OR52A1
PTCHD3
SHISAL2A
FAM153B
B4GALNT4
FAM87A
CCNYL2
C1orf116
MAGEB17
OTOP3
NKX2-5
CALHM3
PTGDR2
RIPPLY3
AC138356.1
POTEC
CTNNA3
OR51B4
OR52E8
CCDC60
EPHA10
REC114
SH2D7
ACSM5
BPIFA4P
EFHC2
ACP7
B3GALT5
KCTD8
ZNF730
ARSI
SRARP
DUSP5P1
KRTAP20-2
CLDN5
RPL7AP28
EFNA5
KRTAP19-1
H1-5
PKP3
MAP7D2
LRRC19
GAST
KCNH7
PRSS55
SATL1
DRD1
FAM227A
MUC6
RFX6
MROH2A
ANO9
MYADML2
MFSD6L
NOTUM
RBM11
GALNT17
AC026785.1
PARPBP
MUC1
DLK1
SPATA8
PDIA2
NTF3
PRAME
NRG3
LEMD1
KRT5
NBPF6
SAPCD2
LCE1E
GPAT2
GABRA5
GLDN
DEFB132
MPPED1
QRFPR
C1QL4
SERPINA11
P2RY4
KRTAP19-5
PNLIPRP1
CYP4A11
LYPD6
BAGE2
MT1X
GCNT1
KRT12
LUZP2
LHFPL3
C11orf96
SERPINA13P
PRR27
ZNF385C
ERC2
AMTN
EZHIP
KBTBD12
TMEM72
TMEM202
DMBT1
AC091057.1
CPSF4L
ZSCAN23
TPRG1
WNT7B
C6orf132
KRTAP10-6
HEPACAM2
NCR3LG1
PLA2G2A
SBK1
PDCD1
NCCRP1
AF279873.1
COL25A1
HBA2
HMX3
H1-9P
HMX2
GLRA4
AC114947.1
GJB3
ANKRD34B
DPY19L2P1
AC069277.1
ZNF724
SPOCK3
PLEKHG4
CTSE
BECN2
STK31
OR8D1
ZNF729
CPNE4
NUDT11
NBPF4
SPTSSB
CCDC196
ANKRD20A19P
MMP1
CLPSL2
KRT39
HCAR1
NPSR1-AS1
ZNF679
SLC22A4
H4C11
TPSB2
C6orf141
GUCA2A
HMGA2-AS1
LYPD2
ZNF860
DCHS2
VEPH1
GYPE
SLC28A3
DMBX1
VN1R5
CR1L
CYP2A13
NBEAP2
KEL
DLGAP2
ZNF560
AVPR1B
SULT1C4
ADH4
ZNF849P
BPIFA1
DCAF12L2
TMEM207
MT1F
KRTAP4-1
ZNF43
SLC34A3
ZNF534
LPA
MT-ND6
PPP1R14C
PLXNB3
RASSF9
MUC2
GRM3
RASGEF1A
MIR429
U3
RNU6-247P
Y_RNA
RNA5SP334
SNORD113-3
AL353740.1
TAS2R2P
LINC02408
LINC00501
TCP10L3
LINC00272
TEDDM1
METTL11B
KPRP
RIPPLY2
LINC00632
CXorf66
CT83
TCEAL5
TDRG1
NAP1L6P
CLPSL1
GPRIN2
PTPN20
COL11A2
XAGE1A
XAGE1B
SLC44A4
LY6G6C
AL451142.1
POTEKP
LINC01854
PRAMEF17
DDR1
LRCOL1
RNF39
DISP3
SSX9P
ASPDH
OR2H2
OR2H1
OR14J1
MALRD1
LINC01951
REG1CP
ZNF204P
KRT25
FAM83A-AS1
PCDHA7
PCDHA5
PCDHA4
PCDHA2
MS4A13
PRSS1
CRTC1P1
LINC01121
CLLU1-AS1
LINC02716
CCDC144NL
TRBV20OR9-2
KRT17P4
MT1H
MT1CP
MT1DP
MT1A
MT1M
LINC00661
TP53TG3D
TMEM256
AP001042.1
LINC01310
LINC00898
TECRL
LINC00634
AL359878.1
SLCO1B7
GAGE1
CLEC6A
OR7E91P
FAM99A
AC108134.1
BHLHA9
IFITM5
SERPINB4
KRTAP20-4
EGFEM1P
HBA1
HBM
FOXL2NB
CD200R1L
XKR4
AC007240.1
AL713899.1
SNORD3H
RNU6-1031P
MIR559
MT-TC
MT-TY
MT-TE
MT-TT
GPX3
IGKV4-1
IGLV1-47
IGLV1-44
IGLV3-19
IGLV2-18
IGLV3-10
TRBV4-1
IGHV1-3
IGHV1-46
IGHV3-49
IGHV1-58
IGHV4-61
IGHV3-66
IGHV3-73
RNA5SP18
AURKAP1
AC104131.1
MLLT11
AC005229.1
TOMM40P4
NOC2LP1
PPP1R2P10
LCAT
GPC2
KPNA4P1
ZNF99
AC010615.1
ZNF90
TM6SF2
PGAM1P7
ATP5PBP3
RRM2P3
UCA1
PLAC9P1
CTAGE14P
ANG
COLCA2
FOXI3
LCNL1
KRT18P13
LRRC37A4P
CYCSP6
GOLGA2P8
SEC14L6
SPINK13
NOTO
MEG3
SLC6A10P
LINC01913
AL355309.1
AC092821.1
FER1L6
APOC1P1
KRT16P1
SPATA31D1
BX322639.1
PRSS41
ABCD1P2
MUC5AC
AL592293.1
AC116351.1
AP005901.1
LINC00189
GAB4
HMX1
LINC01139
AC092506.1
AL136309.1
RPL37P15
IGSF23
RPL22P12
FAM240C
TDGF1P4
AC099552.1
AC008060.1
CELA3B
PTCHD3P3
AC093802.1
ACTBP8
RPL21P16
LL22NC03-63E9.3
LINC02531
SNORD88A
DPP3P2
HMSD
LINC01793
KIAA2012-AS1
RNU4-62P
RNU6-77P
RN7SKP106
RNA5SP508
CLDN10-AS1
MEG9
LINC02629
VN1R42P
SMPD4P1
AC005165.1
DSCR4-IT1
HBD
DEFA8P
LINC02247
AC116609.1
TSSC2
MED15P9
LINP1
DIS3L2P1
UBE2E1-AS1
AC073365.1
LINC01342
AC004870.2
LINC02471
HMGN1P4
ARSLP1
SNHG14
MIR548XHG
LINC00570
HAGLR
LINC00466
PINCR
ANKRD30BP2
RPL12P14
THAP5P1
AP001476.1
SLC31A1P1
GUSBP6
HTR2A-AS1
AC098483.1
AL591686.1
MEP1AP4
LINC01087
FAM96AP2
MED15P4
ZNF812P
LINC02671
IMPDH1P8
AC016735.1
BRAFP1
DUX4L9
AL355482.1
AC010789.1
THRB-IT1
LINC02840
PGM5-AS1
U82695.1
AC018814.1
HMGB3P22
PRPF38AP1
AC092941.1
AL583808.1
PNMA6F
ARSDP1
LINC00237
MIR137HG
PSLNR
LINC00705
LHFPL3-AS2
AL353572.1
AC104134.1
LINC01671
AC006548.1
SP3P
ZNF385D-AS1
LINC02158
AP000619.1
MEG8
AL137220.1
AC016582.1
MTND2P9
MTND1P23
AL355482.2
FGF13-AS1
PHF2P2
PRSS44P
AC244107.1
AC112492.1
AL135960.1
GRM7-AS3
AL008733.1
CROCC2
AL606489.1
TMEM252-DT
AC018641.1
LINC01748
AC087499.2
MLXP1
CYP4F26P
SLC9A3P3
PSMD10P2
PP12613
AL138749.1
LINC00840
LINC01941
SHROOM2P1
ERVMER34-1
NRBF2P2
LINC01203
LINC02527
LINC01682
AP000472.1
AL139275.2
AL160286.1
MIR663AHG
SPANXB1
LINC00845
LINC01985
ATP5MC1P4
LINC01537
SOX21-AS1
ISCA1P6
AL713998.1
RPSAP64
AP000344.1
LINC01693
AL031736.1
SPECC1P1
SLC9A7P1
SELENOOLP
ZNF680P1
HNRNPA1P46
CYP1D1P
NGF-AS1
AL160408.1
FAM245A
AL161725.2
AL162726.2
GRASLND
LINC02770
ORM2
AP000593.2
AL450322.1
BX322559.1
AL590226.1
LINC01768
AL162726.3
UGT1A2P
BX284668.2
AC004837.2
HOTAIR
LINC02663
AC079779.2
AL109763.1
LINC02577
AL356310.1
LAMA5-AS1
LINC02041
SATB1-AS1
HOMER2P1
AL161457.1
ABHD17AP4
LINC02587
AL137026.1
AC016710.1
LINC02038
AC114488.1
LINC00200
AC044860.1
MT1P3
LINC01981
AC138089.1
LINC02768
BX088651.2
USP24P1
PRKAR1B-AS2
CTNNA2-AS1
OR8B9P
CNIH3-AS1
LINC00858
UBE2DNL
SACS-AS1
LINC01204
AL358074.1
LINC01079
AC011287.1
PRAC2
AC087857.1
AC004975.2
AL450322.2
LINC02624
AC118754.1
KHSRPP1
AC008568.1
CASC20
AL157373.2
KIF25-AS1
PRPS1L1
PDE11A-AS1
AL357143.1
AC007128.1
AL118523.1
AP001042.2
AL049646.1
AC093578.1
AL445070.1
LINC02641
CNOT6LP1
AC005208.1
LINC02525
AC004160.1
NCAPD2P1
LINC01036
AC004160.2
LRRC37A6P
NEK2P4
ANKRD18B
COL6A4P1
AL121757.1
AL139095.3
AC092683.1
AL445933.1
LINC01818
AL160270.1
AL589745.1
FOXD3-AS1
AL132709.7
LINC01293
AL137803.1
STMND1
LINC00486
AURKBP1
AC092625.1
LINC01804
NPM1P9
LINC01436
LINC01508
AL031666.1
LNCAROD
AC093702.1
LINC01098
AC011752.1
ZNF826P
ZBTB46-AS1
KLF2P1
LINC02884
AC099792.1
GNA14-AS1
LINC00689
FAR2P4
AL358176.4
LARP1BP1
AC124944.1
AC024937.2
E2F6P4
LINC01249
AL139288.1
LINC01090
AL353747.3
TSPAN19
AC079922.1
DLX6-AS1
AKAIN1
AL109615.2
AC007402.1
NEBL-AS1
HS1BP3-IT1
FAM238B
AC005537.1
SILC1
VN1R54P
NCOA7-AS1
IGHV3-43
LNCPRESS1
AL021391.1
BPESC1
AL354824.2
AL355994.2
AC073464.1
MRPL45P1
CSPG4BP
AC004862.1
AC002511.1
AC254562.2
AC239800.2
YWHAEP1
AL162726.4
AL158819.1
LINC01162
SLCO4A1-AS1
LINC01189
AL138787.1
AL121999.1
AC092685.1
AC018742.1
AL121832.1
LINC01399
Z82249.1
AC002511.2
AL355870.1
LINC01728
TMEM18-DT
DSCR10
FAM53B-AS1
AC114485.1
AL139002.1
AL022334.1
UICLM
AL133419.1
LINC01783
AC005482.1
AC008163.1
LINC01518
LINC00460
TEDDM2P
AL138789.1
LINC02640
TWIST2
LINC00462
AC012506.3
AC003985.1
AC139769.1
POU6F2-AS2
LINC01694
MT1XP1
AC004012.1
AL591438.2
PAGE2
AKAP8P1
AC003988.1
AC243772.3
BOK-AS1
AC022498.1
DEPDC1-AS1
LINC00229
AL451069.3
AC009264.1
SNX18P7
AL592546.2
AL138930.1
AL139042.1
MAGI2-AS3
RHOXF1P1
LINC01506
AL354751.1
CTSLP8
MCIDAS
WDR82P1
AC060834.2
LINC01287
LINC01659
AP001626.1
DPP10-AS1
MNX1-AS2
SMARCAL1-AS1
AL357497.1
AC062015.1
Z97192.3
DSCAM-AS1
C12orf75
LINC01702
TATDN2P3
LINC00383
AF127577.3
AL109838.1
RPL12P25
DUSP5P2
AL592466.1
LINC01621
AC010991.1
TRAPPC13P1
LINC01967
AL590705.2
AL078602.1
AC087499.4
AC008268.1
LINC00494
G3BP1P1
LINC00993
AC013268.3
SEPTIN14P12
AC023347.1
SRGAP3-AS4
CTBP2P1
ARHGEF7-AS2
LINC02799
AC007405.2
HGC6.3
SYN3-AS1
GAPDHP14
GRM7-AS1
AC009262.1
GACAT3
AC019117.2
TRHDE-AS1
AL359313.1
AC092941.2
TSPY10
LINC01231
KLF2P4
AC073626.2
LINC02810
AC079780.1
ARHGEF38
LINC01010
RBMY2QP
LINC01186
LINC01554
NF1P8
AL139010.1
AC005550.2
HAND2-AS1
AL162725.2
IMPDH1P4
BMS1P10
CKMT1B
TUSC8
LINC01522
CECR7
GPAT2P1
AC092001.1
AL109615.3
AC011287.2
CT75
AL365259.1
LINC01143
NFYAP1
LINC00844
AP000844.2
LINC01589
Z99755.1
AC078993.1
AC068299.1
AC092691.1
LINC00879
PRR20G
MEIKIN
IGKV1-6
AC132825.1
SMKR1
CPHL1P
UGT1A5
AC108752.1
FAR2P3
TCAM1P
LRRFIP1P1
AC120042.1
LSAMP-AS1
ZNF722P
ARHGAP31-AS1
AC245047.5
SYNPR-AS1
SLC25A24P1
LINC01192
AC092903.1
AL160408.4
LINC02029
AC069499.1
SUMO1P1
AF186996.2
AC108734.3
MDFIC2
HOXB-AS4
PEG10
RPL12P30
UGT1A8
LINC02046
UGT1A10
ZNF702P
LINC02050
AC104831.1
AC068756.1
ALDOAP1
RN7SL180P
RN7SL812P
AC140059.1
ERVW-1
RPL12P35
RBMY2FP
AC020636.1
RN7SL8P
OR7E29P
MNX1-AS1
KC877373.1
LEFTY1
CACNA2D3-AS1
CFAP61-AS1
HMGB1P38
AL035660.2
MT1HL1
IL12A-AS1
RPS18P6
UGT1A7
AC128688.1
GMCL2
LINC00698
FAM3D-AS1
AL137058.1
ERVFRD-1
LINC01391
LINC02086
FCGR2C
PTCHD4
AC087667.1
MIR3150BHG
LINC02211
MIR4300HG
LINC01096
AC040168.1
AC138904.1
RGMB-AS1
LINC02466
AC092343.1
AC099487.1
AC008443.2
LINC01019
LINC01194
ADH1C
PES1P1
LINC02505
AC010275.1
LINC02434
AC096577.1
LINC02469
AC021134.1
AC016642.1
LINC02267
FLJ42969
AC133963.1
AC002070.1
LINC00992
AC008549.1
AC012339.1
AC111000.2
SMIM31
AC106771.1
PMPCAP1
AC024587.1
AC097512.1
AC026782.2
AC010280.2
HHIP-AS1
AC106799.2
AL136360.1
AC004672.1
AC092674.1
AC114801.3
LINC01093
AC106744.1
TMEM132D-AS1
AC106822.1
AC145146.1
AC095060.1
AC011411.1
AC112206.2
LINC02212
AK4P2
LINC02225
AC024560.2
LINC00942
HOXC13-AS
AC110813.1
FER1L5
PARM1-AS1
AC110772.1
ECSCR
AC114786.1
AC004704.1
AC138819.1
HS3ST5
ARHGEF38-IT1
AC119150.1
AC093791.1
AC106895.1
AC122710.1
AC025176.1
AC106795.3
LINC02232
AC109927.1
CTD-2350J17.1
MGC32805
LINC02200
AACSP1
LINC02105
AC008825.1
LINC02125
AC079160.1
AC114786.2
AC097652.1
LINC00491
LINC02269
AC106872.8
AC107222.1
AC096759.2
LINC02381
AC106865.1
AC093730.1
AC106892.1
AC010255.2
AC010595.1
AC107396.1
AC091173.1
AC015631.1
AC103764.1
AC010457.1
RFPL4B
LINC02228
ERVH-1
TUBB7P
SLC25A15P3
CAB39P1
MTCYBP35
AC106744.2
FOXD1
PITPNM2-AS1
AC021146.11
SNX18P24
AC096711.2
OR12D1
FAM160A1-DT
AC139491.5
SNHG27
RNU6-1161P
RNY3P16
MIR514B
RNA5SP490
AC114550.1
AC090821.2
AC068228.1
AC069120.1
AC022034.3
LINC02159
IGHV7-40
AC124290.2
LINC01414
AC011978.1
VENTXP5
AC018953.1
AC022915.2
AC107959.3
AF279873.3
AC138646.1
LINC02866
AC011632.1
AC019257.1
GUSBP14
FER1L6-AS2
AC022915.3
AC105118.1
AC007991.3
LINC01863
NRG1-IT1
AC103726.2
IGKV2-29
AC009902.2
AC084346.1
AC115837.1
AC021613.1
PPIAP85
LINC02842
CD8B2
MTND6P3
LINC01485
AC100849.2
PKIA-AS1
AC087855.2
NDST1-AS1
AC062004.1
HOXA-AS3
AC060765.2
GLYATL1P4
AC113143.1
RCC2P6
LINC02750
BBOX1-AS1
AP003393.1
GLULP3
AP004550.1
AP001783.1
AC087379.1
RTL1
AC087379.2
FAM8A2P
MEX3A
AC104009.1
AC024405.2
AP003171.1
AF131216.3
AC109635.2
AP002001.2
GRM5-AS1
AC090159.1
AC023245.2
AP003171.2
LINC02726
WIZP1
AC108136.1
AP002957.1
MTCO1P15
SMILR
AC107886.1
UBTFL10
[truncated: 734 more rows]
