# Supplementary material for: NamiRNA-mediated high expression of KNSTRN correlates with poor prognosis and tumor immune infiltration of hepatocellular carcinoma
Source: Research Square preprint supplement (doi:10.21203/rs.3.rs-3032233/v1), 2023-06-26
Supplement: Supplementary file 9 [file b62a9f7b4b774c910d16054a.xlsx]

## Sheet: Sheet1
Supplementary File.5 Detailed information of KNSTRN coexpressed genes.
#node1	node2	node1_string_id	node2_string_id	neighborhood_on_chromosome	gene_fusion	phylogenetic_cooccurrence	homology	coexpression	experimentally_determined_interaction	database_annotated	automated_textmining	combined_score
AURKB	KNSTRN	9606.ENSP00000313950	9606.ENSP00000249776	0	0	0	0	0.627	0	0	0.418	0.774
AURKB	CCNB1	9606.ENSP00000313950	9606.ENSP00000256442	0	0	0	0	0.941	0.165	0	0.821	0.99
AURKB	CENPE	9606.ENSP00000313950	9606.ENSP00000265148	0	0	0	0	0.935	0.146	0	0.826	0.989
AURKB	NUF2	9606.ENSP00000313950	9606.ENSP00000271452	0	0	0	0	0.829	0.27	0	0.806	0.973
AURKB	BUB1B	9606.ENSP00000313950	9606.ENSP00000287598	0	0	0	0	0.918	0.315	0	0.924	0.995
AURKB	CCNB2	9606.ENSP00000313950	9606.ENSP00000288207	0	0	0	0	0.962	0.165	0	0.735	0.991
AURKB	SPAG5	9606.ENSP00000313950	9606.ENSP00000323300	0	0	0	0	0.919	0	0	0.456	0.954
AURKB	CDC20	9606.ENSP00000313950	9606.ENSP00000361540	0	0	0	0	0.972	0.335	0.6	0.862	0.998
BUB1B	KNSTRN	9606.ENSP00000287598	9606.ENSP00000249776	0	0	0	0	0.622	0	0	0.557	0.825
BUB1B	CCNB1	9606.ENSP00000287598	9606.ENSP00000256442	0	0	0	0	0.937	0.101	0.9	0.809	0.998
BUB1B	CENPE	9606.ENSP00000287598	9606.ENSP00000265148	0	0	0	0	0.919	0.884	0	0.991	0.999
BUB1B	NUF2	9606.ENSP00000287598	9606.ENSP00000271452	0	0	0	0	0.801	0.15	0	0.754	0.954
BUB1B	SPAG5	9606.ENSP00000287598	9606.ENSP00000323300	0	0	0	0	0.922	0.394	0	0.429	0.97
BUB1B	CCNB2	9606.ENSP00000287598	9606.ENSP00000288207	0	0	0	0	0.927	0.101	0	0.77	0.983
BUB1B	AURKB	9606.ENSP00000287598	9606.ENSP00000313950	0	0	0	0	0.918	0.315	0	0.924	0.995
BUB1B	CDC20	9606.ENSP00000287598	9606.ENSP00000361540	0	0	0	0	0.953	0.999	0.8	0.993	0.999
CCNB1	KNSTRN	9606.ENSP00000256442	9606.ENSP00000249776	0	0	0	0	0.82	0	0	0.165	0.844
CCNB1	NUF2	9606.ENSP00000256442	9606.ENSP00000271452	0	0	0	0	0.816	0	0	0.466	0.897
CCNB1	SPAG5	9606.ENSP00000256442	9606.ENSP00000323300	0	0	0	0	0.873	0	0	0.283	0.905
CCNB1	CENPE	9606.ENSP00000256442	9606.ENSP00000265148	0	0	0	0	0.829	0.139	0	0.658	0.945
CCNB1	AURKB	9606.ENSP00000256442	9606.ENSP00000313950	0	0	0	0	0.941	0.165	0	0.821	0.99
CCNB1	BUB1B	9606.ENSP00000256442	9606.ENSP00000287598	0	0	0	0	0.937	0.101	0.9	0.809	0.998
CCNB1	CCNB2	9606.ENSP00000256442	9606.ENSP00000288207	0	0	0	0.943	0.955	0.754	0.9	0.856	0.998
CCNB1	CDC20	9606.ENSP00000256442	9606.ENSP00000361540	0	0	0	0	0.971	0.97	0.6	0.947	0.999
CCNB2	KNSTRN	9606.ENSP00000288207	9606.ENSP00000249776	0	0	0	0	0.797	0	0	0.064	0.802
CCNB2	CCNB1	9606.ENSP00000288207	9606.ENSP00000256442	0	0	0	0.943	0.955	0.754	0.9	0.856	0.998
CCNB2	CENPE	9606.ENSP00000288207	9606.ENSP00000265148	0	0	0	0	0.871	0.139	0	0.58	0.949
CCNB2	NUF2	9606.ENSP00000288207	9606.ENSP00000271452	0	0	0	0	0.886	0	0	0.424	0.932
CCNB2	BUB1B	9606.ENSP00000288207	9606.ENSP00000287598	0	0	0	0	0.927	0.101	0	0.77	0.983
CCNB2	SPAG5	9606.ENSP00000288207	9606.ENSP00000323300	0	0	0	0	0.936	0	0	0.373	0.958
CCNB2	AURKB	9606.ENSP00000288207	9606.ENSP00000313950	0	0	0	0	0.962	0.165	0	0.735	0.991
CCNB2	CDC20	9606.ENSP00000288207	9606.ENSP00000361540	0	0	0	0	0.988	0.672	0.6	0.894	0.999
CDC20	KNSTRN	9606.ENSP00000361540	9606.ENSP00000249776	0	0	0	0	0.8	0	0	0.203	0.834
CDC20	CCNB1	9606.ENSP00000361540	9606.ENSP00000256442	0	0	0	0	0.971	0.97	0.6	0.947	0.999
CDC20	CENPE	9606.ENSP00000361540	9606.ENSP00000265148	0	0	0	0	0.966	0.102	0	0.824	0.994
CDC20	NUF2	9606.ENSP00000361540	9606.ENSP00000271452	0	0	0	0	0.914	0.056	0	0.623	0.967
CDC20	BUB1B	9606.ENSP00000361540	9606.ENSP00000287598	0	0	0	0	0.953	0.999	0.8	0.993	0.999
CDC20	CCNB2	9606.ENSP00000361540	9606.ENSP00000288207	0	0	0	0	0.988	0.672	0.6	0.894	0.999
CDC20	AURKB	9606.ENSP00000361540	9606.ENSP00000313950	0	0	0	0	0.972	0.335	0.6	0.862	0.998
CDC20	SPAG5	9606.ENSP00000361540	9606.ENSP00000323300	0	0	0	0	0.938	0	0	0.293	0.954
CENPE	KNSTRN	9606.ENSP00000265148	9606.ENSP00000249776	0	0	0	0	0.362	0	0	0.883	0.922
CENPE	CCNB1	9606.ENSP00000265148	9606.ENSP00000256442	0	0	0	0	0.829	0.139	0	0.658	0.945
CENPE	SPAG5	9606.ENSP00000265148	9606.ENSP00000323300	0	0	0	0	0.839	0.348	0	0.46	0.938
CENPE	CCNB2	9606.ENSP00000265148	9606.ENSP00000288207	0	0	0	0	0.871	0.139	0	0.58	0.949
CENPE	NUF2	9606.ENSP00000265148	9606.ENSP00000271452	0	0	0	0	0.828	0.55	0	0.867	0.988
CENPE	AURKB	9606.ENSP00000265148	9606.ENSP00000313950	0	0	0	0	0.935	0.146	0	0.826	0.989
CENPE	CDC20	9606.ENSP00000265148	9606.ENSP00000361540	0	0	0	0	0.966	0.102	0	0.824	0.994
CENPE	BUB1B	9606.ENSP00000265148	9606.ENSP00000287598	0	0	0	0	0.919	0.884	0	0.991	0.999
CHMP1B	KNSTRN	9606.ENSP00000432279	9606.ENSP00000249776	0	0	0	0	0	0.192	0	0.733	0.775
IQGAP1	KNSTRN	9606.ENSP00000268182	9606.ENSP00000249776	0	0	0	0	0.065	0	0	0.833	0.838
KNSTRN	AURKB	9606.ENSP00000249776	9606.ENSP00000313950	0	0	0	0	0.627	0	0	0.418	0.774
KNSTRN	CHMP1B	9606.ENSP00000249776	9606.ENSP00000432279	0	0	0	0	0	0.192	0	0.733	0.775
KNSTRN	CCNB2	9606.ENSP00000249776	9606.ENSP00000288207	0	0	0	0	0.797	0	0	0.064	0.802
KNSTRN	BUB1B	9606.ENSP00000249776	9606.ENSP00000287598	0	0	0	0	0.622	0	0	0.557	0.825
KNSTRN	NUF2	9606.ENSP00000249776	9606.ENSP00000271452	0	0	0	0	0.471	0	0	0.698	0.833
KNSTRN	CDC20	9606.ENSP00000249776	9606.ENSP00000361540	0	0	0	0	0.8	0	0	0.203	0.834
KNSTRN	IQGAP1	9606.ENSP00000249776	9606.ENSP00000268182	0	0	0	0	0.065	0	0	0.833	0.838
KNSTRN	CCNB1	9606.ENSP00000249776	9606.ENSP00000256442	0	0	0	0	0.82	0	0	0.165	0.844
KNSTRN	CENPE	9606.ENSP00000249776	9606.ENSP00000265148	0	0	0	0	0.362	0	0	0.883	0.922
KNSTRN	SPAG5	9606.ENSP00000249776	9606.ENSP00000323300	0	0	0	0	0.537	0	0	0.945	0.973
NUF2	KNSTRN	9606.ENSP00000271452	9606.ENSP00000249776	0	0	0	0	0.471	0	0	0.698	0.833
NUF2	CCNB1	9606.ENSP00000271452	9606.ENSP00000256442	0	0	0	0	0.816	0	0	0.466	0.897
NUF2	CENPE	9606.ENSP00000271452	9606.ENSP00000265148	0	0	0	0	0.828	0.55	0	0.867	0.988
NUF2	SPAG5	9606.ENSP00000271452	9606.ENSP00000323300	0	0	0	0	0.743	0	0	0.472	0.858
NUF2	CCNB2	9606.ENSP00000271452	9606.ENSP00000288207	0	0	0	0	0.886	0	0	0.424	0.932
NUF2	BUB1B	9606.ENSP00000271452	9606.ENSP00000287598	0	0	0	0	0.801	0.15	0	0.754	0.954
NUF2	CDC20	9606.ENSP00000271452	9606.ENSP00000361540	0	0	0	0	0.914	0.056	0	0.623	0.967
NUF2	AURKB	9606.ENSP00000271452	9606.ENSP00000313950	0	0	0	0	0.829	0.27	0	0.806	0.973
SPAG5	KNSTRN	9606.ENSP00000323300	9606.ENSP00000249776	0	0	0	0	0.537	0	0	0.945	0.973
SPAG5	CCNB1	9606.ENSP00000323300	9606.ENSP00000256442	0	0	0	0	0.873	0	0	0.283	0.905
SPAG5	CENPE	9606.ENSP00000323300	9606.ENSP00000265148	0	0	0	0	0.839	0.348	0	0.46	0.938
SPAG5	NUF2	9606.ENSP00000323300	9606.ENSP00000271452	0	0	0	0	0.743	0	0	0.472	0.858
SPAG5	BUB1B	9606.ENSP00000323300	9606.ENSP00000287598	0	0	0	0	0.922	0.394	0	0.429	0.97
SPAG5	CCNB2	9606.ENSP00000323300	9606.ENSP00000288207	0	0	0	0	0.936	0	0	0.373	0.958
SPAG5	AURKB	9606.ENSP00000323300	9606.ENSP00000313950	0	0	0	0	0.919	0	0	0.456	0.954
SPAG5	CDC20	9606.ENSP00000323300	9606.ENSP00000361540	0	0	0	0	0.938	0	0	0.293	0.954
