# Supplementary material for: NamiRNA-mediated high expression of KNSTRN correlates with poor prognosis and tumor immune infiltration of hepatocellular carcinoma
Source: Research Square preprint supplement (doi:10.21203/rs.3.rs-3032233/v1), 2023-06-26
Supplement: Supplementary file 10 [file e22f867940be90fec4cdb11f.xlsx]

## Sheet: Sheet 1
LIHC_clinical_CELL_supplemental
Samples	type	age_at_initial_pathologic_diagnosis.y	gender.y	race	ajcc_pathologic_tumor_stage	clinical_stage	histological_type.y	histological_grade	initial_pathologic_dx_year	menopause_status.y	birth_days_to	vital_status.y	tumor_status	last_contact_days_to	death_days_to	cause_of_death	new_tumor_event_type	new_tumor_event_site	new_tumor_event_site_other	new_tumor_event_dx_days_to	treatment_outcome_first_course	residual_tumor.y	OS	OS.time.y	DSS	DSS.time	DFI	DFI.time	PFI	PFI.time	Redaction
TCGA-DD-A1EA	LIHC	68	MALE	ASIAN	Stage II	[Not Applicable]	Hepatocellular Carcinoma	G2	2002	[Not Available]	-24925	Alive	WITH TUMOR	2415		[Not Available]	Locoregional Recurrence	Liver		754	[Not Available]	R0	0	2415	0	2415	1	754	1	754
TCGA-KR-A7K0	LIHC	65	MALE	WHITE	Stage I	[Not Applicable]	Hepatocellular Carcinoma	G1	2013	[Not Available]	-23974	Dead	TUMOR FREE		65	[Not Available]					[Not Available]	R0	1	65	0	65	0	65	0	65
TCGA-DD-A4NS	LIHC	61	FEMALE	WHITE	Stage I	[Not Applicable]	Hepatocellular Carcinoma	G2	2005	[Not Available]	-22638	Dead	WITH TUMOR		2456	[Not Available]	Extrahepatic Recurrence	Bone		893	[Not Available]	R0	1	2456	1	2456	1	893	1	893
TCGA-CC-A5UC	LIHC	63	MALE	ASIAN	Stage IIIA	[Not Applicable]	Hepatocellular Carcinoma	G3	2012	[Not Available]	-23156	Dead	WITH TUMOR		347	[Not Available]	New Primary Tumor	Lung		312	[Not Available]	R0	1	347	1	347	0	347	1	312
TCGA-G3-AAV7	LIHC	38	MALE	ASIAN	Stage II	[Not Applicable]	Hepatocellular Carcinoma	G2	2013	[Not Available]	-14229	Alive	TUMOR FREE	361		[Not Available]					[Not Available]	R0	0	361	0	361	0	361	0	361
TCGA-DD-AAED	LIHC	51	MALE	ASIAN	Stage I	[Not Applicable]	Hepatocellular Carcinoma	G3	2012	[Not Available]	-18722	Alive	WITH TUMOR	763		[Not Available]	Intrahepatic Recurrence	Liver		198	[Not Available]	R0	0	763	0	763	1	198	1	198
TCGA-DD-AAE0	LIHC	45	FEMALE	ASIAN	Stage IIIA	[Not Applicable]	Hepatocellular Carcinoma	G4	2013	[Not Available]	-16732	Alive	TUMOR FREE	555		[Not Available]					[Not Available]	R0	0	555	0	555	0	555	0	555
TCGA-CC-A3M9	LIHC	45	MALE	ASIAN	Stage IIIA	[Not Applicable]	Hepatocellular Carcinoma	G3	2011	[Not Available]	-16460	Dead	WITH TUMOR		300	[Not Available]	Locoregional Recurrence			219	[Not Available]	R0	1	300	1	300	1	219	1	219
TCGA-DD-A3A4	LIHC	37	MALE	WHITE	Stage IIIA	[Not Applicable]	Hepatocellular Carcinoma	G3	1998	[Not Available]	-13739	Dead	WITH TUMOR		612	[Not Available]	Intrahepatic Recurrence	Liver		87	[Not Available]	R0	1	612	1	612	1	87	1	87
TCGA-DD-AADB	LIHC	51	MALE	ASIAN	Stage I	[Not Applicable]	Hepatocellular Carcinoma	G4	2011	[Not Available]	-18728	Alive	TUMOR FREE	1242		[Not Available]					[Not Available]	R0	0	1242	0	1242	0	1242	0	1242
TCGA-G3-A25V	LIHC	68	MALE	WHITE	Stage I	[Not Applicable]	Hepatocellular Carcinoma	G2	2010	[Not Available]	-25144	Alive	WITH TUMOR	860		[Not Available]	Intrahepatic Recurrence	Liver		489	[Not Available]	R0	0	860	0	860	1	489	1	489
TCGA-DD-AAE7	LIHC	72	MALE	ASIAN	Stage I	[Not Applicable]	Hepatocellular Carcinoma	G2	2012	[Not Available]	-26568	Alive	TUMOR FREE	644		[Not Available]					[Not Available]	R0	0	644	0	644	0	644	0	644
TCGA-LG-A9QC	LIHC	48	MALE	WHITE	Stage I	[Not Applicable]	Hepatocellular Carcinoma	G2	2013	[Not Available]	-17842	Alive	TUMOR FREE	425		[Not Available]					[Not Available]	R0	0	425	0	425	0	425	0	425
TCGA-DD-AAEH	LIHC	73	MALE	ASIAN	Stage I	[Not Applicable]	Hepatocellular Carcinoma	G2	2012	[Not Available]	-26894	Alive	TUMOR FREE	784		[Not Available]	Extrahepatic Recurrence	Bone		644	[Not Available]	R0	0	784	0	784	1	644	1	644
TCGA-DD-AAW1	LIHC	55	MALE	ASIAN	Stage IIIA	[Not Applicable]	Hepatocellular Carcinoma	G2	2009	[Not Available]	-20288	Alive	TUMOR FREE	1989		[Not Available]					[Not Available]	R0	0	1989	0	1989	0	1989	0	1989
TCGA-2Y-A9H9	LIHC	70	MALE	WHITE	Stage I	[Not Applicable]	Hepatocellular Carcinoma	G2	2011	[Not Available]	-25670	Alive	WITH TUMOR	697		[Not Available]	Locoregional Recurrence	Liver		59	[Not Available]	R0	0	697	0	697	1	59	1	59
TCGA-5C-AAPD	LIHC	61	MALE	ASIAN	Stage II	[Not Applicable]	Hepatocholangiocarcinoma (Mixed)	G1	2013	[Not Available]	-22552	Alive	TUMOR FREE	20		[Not Available]					[Not Available]	R0	0	20	0	20	0	20	0	20
TCGA-EP-A2KA	LIHC	52	FEMALE	WHITE	Stage IIIA	[Not Applicable]	Hepatocellular Carcinoma	G3	2011	[Not Available]	-19214	Dead	WITH TUMOR		627	[Not Available]	Extrahepatic Recurrence	Lung		293	[Not Available]	R0	1	627	1	627	1	293	1	293
TCGA-DD-A73B	LIHC	72	FEMALE	WHITE	Stage I	[Not Applicable]	Hepatocellular Carcinoma	G2	2012	[Not Available]	-26390	Dead	WITH TUMOR		283	[Not Available]	Locoregional Recurrence	Liver		240	[Not Available]	R0	1	283	1	283	1	240	1	240
TCGA-UB-A7MD	LIHC	67	MALE	BLACK OR AFRICAN AMERICAN	Stage I	[Not Applicable]	Hepatocellular Carcinoma	G3	2013	[Not Available]	-24717	Dead	TUMOR FREE		52	[Not Available]					[Not Available]	R0	1	52	0	52	0	52	0	52
TCGA-DD-A113	LIHC	55	FEMALE	WHITE	Stage II	[Not Applicable]	Hepatocellular Carcinoma	G3	2006	[Not Available]	-20188	Alive	WITH TUMOR	2425		[Not Available]	Intrahepatic Recurrence	Liver		1676	[Not Available]	R0	0	2425	0	2425	1	1676	1	1676
TCGA-5C-A9VH	LIHC	70	MALE	WHITE	Stage I	[Not Applicable]	Hepatocellular Carcinoma	G2	2013	[Not Available]	-25608	Alive	TUMOR FREE	322		[Not Available]					[Not Available]	R0	0	322	0	322	0	322	0	322
TCGA-ED-A5KG	LIHC	60	FEMALE	ASIAN	Stage II	[Not Applicable]	Hepatocellular Carcinoma	G2	2012	[Not Available]	-22258	Alive	WITH TUMOR	854		[Not Available]	New Primary Tumor	Other, specify	Kidney	110	[Not Available]	R0	0	854	0	854	0	854	1	110
TCGA-BC-A10U	LIHC	69	MALE	WHITE	[Not Available]	[Not Applicable]	Hepatocellular Carcinoma	G2	2000	[Not Available]	-25305	Dead	WITH TUMOR		837	[Not Available]	Intrahepatic Recurrence			586	[Not Available]	R1	1	837	1	837			1	586
TCGA-DD-A39V	LIHC	77	MALE	WHITE	Stage II	[Not Applicable]	Hepatocellular Carcinoma	G3	2000	[Not Available]	-28254	Dead	WITH TUMOR		643	[Not Available]	Extrahepatic Recurrence	Other, specify	second or third rib posteriorly	455	[Not Available]	R0	1	643	1	643	1	455	1	455
TCGA-ED-A627	LIHC	74	MALE	WHITE	Stage I	[Not Applicable]	Hepatocellular Carcinoma	G2	2012	[Not Available]	-27303	Alive	TUMOR FREE	423		[Not Available]					[Not Available]	R0	0	423	0	423	0	423	0	423
TCGA-G3-AAV2	LIHC	50	MALE	WHITE	Stage I	[Not Applicable]	Hepatocellular Carcinoma	G1	2013	[Not Available]	-18363	Alive	TUMOR FREE	372		[Not Available]					[Not Available]	R0	0	372	0	372	0	372	0	372
TCGA-ZS-A9CD	LIHC	73	MALE	WHITE	Stage II	[Not Applicable]	Hepatocellular Carcinoma	G2	2010	[Not Available]	-26915	Dead			1386	[Not Available]	Intrahepatic Recurrence	Liver		371	[Not Available]	R0	1	1386		1386	1	371	1	371
TCGA-GJ-A9DB	LIHC	68	MALE	WHITE	Stage I	[Not Applicable]	Hepatocellular Carcinoma	G2	2013	[Not Available]	-25020	Dead			67	[Not Available]					[Not Available]	R0	1	67		67	0	67	0	67
TCGA-G3-AAV4	LIHC	83	FEMALE	WHITE	Stage I	[Not Applicable]	Hepatocellular Carcinoma	G1	2012	[Not Available]	-30466	Dead	TUMOR FREE		27	[Not Available]					[Not Available]	R0	1	27	0	27	0	27	0	27
TCGA-DD-AADP	LIHC	45	MALE	ASIAN	Stage I	[Not Applicable]	Hepatocellular Carcinoma	G3	2013	[Not Available]	-16760	Alive	TUMOR FREE	458		[Not Available]					[Not Available]	R0	0	458	0	458	0	458	0	458
TCGA-DD-A4NL	LIHC	46	MALE	WHITE	Stage I	[Not Applicable]	Hepatocellular Carcinoma	G1	2007	[Not Available]	-16874	Alive	TUMOR FREE	1711		[Not Available]					[Not Available]	R0	0	1711	0	1711	0	1711	0	1711
TCGA-CC-5261	LIHC	44	MALE	ASIAN	Stage II	[Not Applicable]	Hepatocellular Carcinoma	G2	2010	[Not Available]	-16373	Dead	TUMOR FREE		97	[Not Available]					[Not Available]	RX	1	97	0	97			0	97
TCGA-UB-A7MC	LIHC	59	MALE	WHITE	Stage IIIA	[Not Applicable]	Hepatocellular Carcinoma	G3	2013	[Not Available]	-21733	Alive	WITH TUMOR	500		[Not Available]	Extrahepatic Recurrence	Other, specify	Adrenal glands	359	[Not Available]	R0	0	500	0	500	1	359	1	359
TCGA-CC-A7IF	LIHC	59	MALE	ASIAN	Stage IIIA	[Not Applicable]	Hepatocellular Carcinoma	G1	2013	[Not Available]	-21845	Dead	WITH TUMOR		649	[Not Available]	New Primary Tumor	Lung		254	[Not Available]	R0	1	649	1	649	0	649	1	254
TCGA-4R-AA8I	LIHC	66	MALE	WHITE	Stage II	[Not Applicable]	Hepatocellular Carcinoma	G2	2013	[Not Available]	-24279	Dead	WITH TUMOR		262	[Not Available]	Locoregional Recurrence	Liver		158	[Not Available]	R0	1	262	1	262	1	158	1	158
TCGA-DD-A73C	LIHC	65	FEMALE	WHITE	Stage IIIA	[Not Applicable]	Hepatocellular Carcinoma	G1	2012	[Not Available]	-23782	Alive	WITH TUMOR	701		[Not Available]	Locoregional Recurrence	Liver		566	[Not Available]	R0	0	701	0	701	1	566	1	566
TCGA-CC-5259	LIHC	60	FEMALE	ASIAN	Stage IIIC	[Not Applicable]	Hepatocellular Carcinoma	G2	2010	[Not Available]	-21946	Alive	WITH TUMOR	250		[Not Available]	Locoregional Recurrence	Liver		180	[Not Available]	R0	0	250	0	250	1	180	1	180
TCGA-2Y-A9GW	LIHC	64	MALE	WHITE	Stage I	[Not Applicable]	Hepatocellular Carcinoma	G2	2007	[Not Available]	-23587	Dead	WITH TUMOR		1271	[Not Available]	Locoregional Recurrence	Liver		1229	[Not Available]	R0	1	1271	1	1271	1	1229	1	1229
TCGA-BC-A10S	LIHC	81	MALE	WHITE	[Not Available]	[Not Applicable]	Hepatocellular Carcinoma	G1	1999	[Not Available]	-29842	Dead	WITH TUMOR		1423	[Not Available]	Intrahepatic Recurrence			1130	[Not Available]	R0	1	1423	1	1423	1	1130	1	1130
TCGA-UB-A7ME	LIHC	51	MALE	ASIAN	Stage I	[Not Applicable]	Hepatocellular Carcinoma	G2	2013	[Not Available]	-18846	Alive	TUMOR FREE	486		[Not Available]					[Not Available]	R0	0	486	0	486	0	486	0	486
TCGA-ED-A97K	LIHC	54	MALE	ASIAN	Stage IIIA	[Not Applicable]	Hepatocholangiocarcinoma (Mixed)	G2	2013	[Not Available]	-20073	Alive	TUMOR FREE	6		[Not Available]					[Not Available]	R0	0	6	0	6	0	6	0	6
TCGA-XR-A8TF	LIHC	74	MALE	WHITE	Stage I	[Not Applicable]	Hepatocellular Carcinoma	G1	2012	[Not Available]	-27145	Dead	TUMOR FREE		693	[Not Available]	Intrahepatic Recurrence	Liver		231	[Not Available]	R0	1	693	0	693	1	231	1	231
TCGA-CC-A7II	LIHC	54	MALE	ASIAN	Stage IIIA	[Not Applicable]	Hepatocellular Carcinoma	G3	2013	[Not Available]	-20079	Alive	WITH TUMOR	399		[Not Available]	Locoregional Recurrence			278	[Not Available]	R0	0	399	0	399	1	278	1	278
TCGA-DD-AADQ	LIHC	59	MALE	ASIAN	Stage II	[Not Applicable]	Hepatocellular Carcinoma	G3	2013	[Not Available]	-21756	Alive	TUMOR FREE	436		[Not Available]					[Not Available]	R0	0	436	0	436	0	436	0	436
TCGA-K7-A6G5	LIHC	66	MALE	WHITE	Stage I	[Not Applicable]	Hepatocellular Carcinoma	G2	2013	[Not Available]	-24233	Alive	TUMOR FREE	512		[Not Available]					[Not Available]	RX	0	512	0	512			0	512
TCGA-CC-5264	LIHC	71	MALE	ASIAN	Stage IIIA	[Not Applicable]	Hepatocellular Carcinoma	G2	2010	[Not Available]	-25979	Dead	TUMOR FREE		102	[Not Available]					[Not Available]	RX	1	102	0	102			0	102
TCGA-DD-A39Y	LIHC	67	MALE	ASIAN	Stage I	[Not Applicable]	Hepatocellular Carcinoma	G3	2002	[Not Available]	-24769	Dead	TUMOR FREE		171	[Not Available]					[Not Available]	R0	1	171	0	171	0	171	0	171
TCGA-ED-A8O6	LIHC	50	FEMALE	ASIAN	Stage IIIA	[Not Applicable]	Hepatocellular Carcinoma	G3	2013	[Not Available]	-18572	Dead	TUMOR FREE		56	[Not Available]					[Not Available]	R0	1	56	0	56	0	56	0	56
TCGA-DD-A1E9	LIHC	70	MALE	WHITE	Stage I	[Not Applicable]	Hepatocellular Carcinoma	G2	2002	[Not Available]	-25808	Dead			2759	[Not Available]	Intrahepatic Recurrence	Liver		720	[Not Available]	R0	1	2759		2759	1	720	1	720
TCGA-DD-A1EC	LIHC	20	FEMALE	WHITE	Stage I	[Not Applicable]	Hepatocellular Carcinoma	G3	2004	[Not Available]	-7363	Alive		602		[Not Available]	Extrahepatic Recurrence	Other, specify	peritoneal	299	[Not Available]	R0	0	602	0	602	1	299	1	299
TCGA-DD-A115	LIHC	53	MALE	WHITE	Stage IIIA	[Not Applicable]	Hepatocellular Carcinoma	G2	2002	[Not Available]	-19697	Dead	WITH TUMOR		2542	[Not Available]	Intrahepatic Recurrence	Liver		469	[Not Available]	R0	1	2542	1	2542	1	469	1	469
TCGA-HP-A5MZ	LIHC	78	MALE	[Not Evaluated]	Stage I	[Not Applicable]	Hepatocellular Carcinoma	G2		[Not Available]	-22702	Dead	TUMOR FREE		91	[Not Available]					[Not Available]	R0	1	91	0	91	0	91	0	91
TCGA-DD-A1EK	LIHC	64	FEMALE	WHITE	Stage IVB	[Not Applicable]	Hepatocellular Carcinoma	G2	2008	[Not Available]	-23437	Dead	WITH TUMOR		558	[Not Available]	Locoregional Recurrence	Liver		167	[Not Available]	R0	1	558	1	558			1	167
TCGA-DD-AAE2	LIHC	51	MALE	ASIAN	Stage I	[Not Applicable]	Hepatocellular Carcinoma	G3	2013	[Not Available]	-18695	Alive	TUMOR FREE	638		[Not Available]					[Not Available]	R0	0	638	0	638	0	638	0	638
TCGA-CC-A5UE	LIHC	48	MALE	ASIAN	Stage IIIB	[Not Applicable]	Hepatocellular Carcinoma	G2	2012	[Not Available]	-17805	Dead	WITH TUMOR		272	[Not Available]	Locoregional Recurrence			175	[Not Available]	R0	1	272	1	272	1	175	1	175
TCGA-NI-A8LF	LIHC	74	MALE	WHITE	Stage I	[Not Applicable]	Hepatocellular Carcinoma	G3	2012	[Not Available]	-27162	Alive	TUMOR FREE	799		[Not Available]					[Not Available]	R0	0	799	0	799	0	799	0	799
TCGA-BW-A5NO	LIHC	50	MALE	BLACK OR AFRICAN AMERICAN	Stage IIIA	[Not Applicable]	Hepatocellular Carcinoma	G2	2010	[Not Available]	-18510	Alive	TUMOR FREE	20		[Not Available]					[Not Available]	RX	0	20	0	20			0	20
TCGA-CC-A5UD	LIHC	45	MALE	ASIAN	Stage IIIA	[Not Applicable]	Hepatocellular Carcinoma	G2	2012	[Not Available]	-16702	Dead	WITH TUMOR		304	[Not Available]	Locoregional Recurrence			182	[Not Available]	R0	1	304	1	304	1	182	1	182
TCGA-DD-A1EF	LIHC	57	FEMALE	WHITE	Stage I	[Not Applicable]	Hepatocellular Carcinoma	G3	2007	[Not Available]	-21165	Dead	WITH TUMOR		394	[Not Available]					[Not Available]	R0	1	394	1	394			1	394
TCGA-GJ-A3OU	LIHC	59	MALE	WHITE	Stage I	[Not Applicable]	Hepatocellular Carcinoma	G2	2011	[Not Available]	-21671	Alive	[Discrepancy]	879		[Not Available]	Intrahepatic Recurrence	Liver		879	[Not Available]	RX	0	879	0	879			1	879
TCGA-DD-AAVU	LIHC	46	MALE	ASIAN	Stage II	[Not Applicable]	Hepatocellular Carcinoma	G2	2008	[Not Available]	-16889	Alive	TUMOR FREE	2202		[Not Available]	Intrahepatic Recurrence	Liver		1630	[Not Available]	R0	0	2202	0	2202	1	1630	1	1630
TCGA-G3-A6UC	LIHC	65	MALE	WHITE	Stage IIIB	[Not Applicable]	Hepatocellular Carcinoma	G2	2012	[Not Available]	-23793	Alive	WITH TUMOR	671		[Not Available]	Intrahepatic Recurrence	Liver		639	[Not Available]	R0	0	671	0	671	1	639	1	639
TCGA-CC-A9FU	LIHC	52	FEMALE	ASIAN	Stage IIIA	[Not Applicable]	Hepatocellular Carcinoma	G2	2013	[Not Available]	-19326	Alive	TUMOR FREE	0		[Not Available]					[Not Available]	R0	0	0	0	0	0	0	0	0
TCGA-DD-AAD3	LIHC	43	MALE	ASIAN	Stage I	[Not Applicable]	Hepatocellular Carcinoma	G2	2011	[Not Available]	-15706	Alive	TUMOR FREE	1295		[Not Available]					[Not Available]	R0	0	1295	0	1295	0	1295	0	1295
TCGA-2Y-A9GU	LIHC	55	FEMALE	WHITE	Stage I	[Not Applicable]	Hepatocellular Carcinoma	G2	2009	[Not Available]	-20187	Alive	TUMOR FREE	1939		[Not Available]					[Not Available]	R0	0	1939	0	1939	0	1939	0	1939
TCGA-MI-A75G	LIHC	63	MALE	WHITE	Stage II	[Not Applicable]	Hepatocellular Carcinoma	G2	2012	[Not Available]	-23284	Alive	TUMOR FREE	698		[Not Available]					[Not Available]	R0	0	698	0	698	0	698	0	698
TCGA-FV-A4ZP	LIHC	78	MALE	WHITE	Stage IIIA	[Not Applicable]	Hepatocellular Carcinoma	G2	2005	[Not Available]	-28771	Dead	TUMOR FREE		2486	[Not Available]					[Not Available]	R1	1	2486	0	2486			0	2486
TCGA-PD-A5DF	LIHC	58	FEMALE	WHITE	Stage IIIB	[Not Applicable]	Hepatocellular Carcinoma	G2	2007	[Not Available]	-21414	Dead	WITH TUMOR		639	[Not Available]					[Not Available]	[Not Available]	1	639	1	639			1	639
TCGA-DD-A3A9	LIHC	64	FEMALE	WHITE	Stage IVB	[Not Applicable]	Hepatocellular Carcinoma	G2	2001	[Not Available]	-23526	Dead	WITH TUMOR		931	[Not Available]	Extrahepatic Recurrence	Lung		289	[Not Available]	R0	1	931	1	931			1	289
TCGA-DD-AACA	LIHC	65	MALE	ASIAN	Stage I	[Not Applicable]	Hepatocellular Carcinoma	G3	2008	[Not Available]	-23973	Alive	WITH TUMOR	2301		[Not Available]	Locoregional Recurrence	Liver		776	[Not Available]	R0	0	2301	0	2301	1	776	1	776
TCGA-DD-AAW2	LIHC	69	MALE	ASIAN	Stage I	[Not Applicable]	Hepatocellular Carcinoma	G2	2009	[Not Available]	-25420	Alive	WITH TUMOR	1855		[Not Available]	Intrahepatic Recurrence	Liver		391	[Not Available]	R0	0	1855	0	1855	1	391	1	391
TCGA-DD-AADD	LIHC	51	MALE	ASIAN	Stage I	[Not Applicable]	Hepatocellular Carcinoma	G4	2011	[Not Available]	-18752	Alive	TUMOR FREE	1231		[Not Available]					[Not Available]	R0	0	1231	0	1231	0	1231	0	1231
TCGA-XR-A8TG	LIHC	58	MALE	WHITE	Stage I	[Not Applicable]	Hepatocellular Carcinoma	G2	2012	[Not Available]	-21544	Alive	TUMOR FREE	898		[Not Available]	Intrahepatic Recurrence	Liver		350	[Not Available]	R0	0	898	0	898	1	350	1	350
TCGA-UB-AA0V	LIHC	69	FEMALE	WHITE	Stage I	[Not Applicable]	Hepatocellular Carcinoma	G1	2013	[Not Available]	-25340	Alive	TUMOR FREE	314		[Not Available]					[Not Available]	R0	0	314	0	314	0	314	0	314
TCGA-CC-A7IE	LIHC	57	MALE	ASIAN	Stage IIIA	[Not Applicable]	Hepatocellular Carcinoma	G2	2012	[Not Available]	-20985	Dead	WITH TUMOR		217	[Not Available]	New Primary Tumor	Lung		169	[Not Available]	R0	1	217	1	217	0	217	1	169
TCGA-BC-A69I	LIHC	69	MALE	WHITE	Stage I	[Not Applicable]	Hepatocellular Carcinoma	G1	2013	[Not Available]	-25370	Alive	TUMOR FREE	387		[Not Available]					[Not Available]	R0	0	387	0	387	0	387	0	387
TCGA-DD-AAE3	LIHC	50	MALE	ASIAN	Stage I	[Not Applicable]	Hepatocellular Carcinoma	G2	2013	[Not Available]	-18271	Alive	TUMOR FREE	566		[Not Available]					[Not Available]	R0	0	566	0	566	0	566	0	566
TCGA-CC-A1HT	LIHC	50	MALE	ASIAN	Stage IIIA	[Not Applicable]	Hepatocellular Carcinoma	G3	2010	[Not Available]	-18553	Dead	TUMOR FREE		101	[Not Available]					[Not Available]	[Not Available]	1	101	0	101			0	101
TCGA-ZP-A9D1	LIHC	56	FEMALE	WHITE	[Not Available]	[Not Applicable]	Hepatocellular Carcinoma	G2	2012	[Not Available]	-20584	Alive	TUMOR FREE	21		[Not Available]					[Not Available]	R0	0	21	0	21	0	21	0	21
TCGA-EP-A3JL	LIHC	76	MALE	WHITE	Stage I	[Not Applicable]	Hepatocellular Carcinoma	G2	2011	[Not Available]	-27886	Alive	TUMOR FREE	303		[Not Available]					[Not Available]	[Not Available]	0	303	0	303			0	303
TCGA-CC-A7IL	LIHC	61	MALE	ASIAN	Stage IIIA	[Not Applicable]	Hepatocellular Carcinoma	G1	2013	[Not Available]	-22319	Dead	WITH TUMOR		278	[Not Available]	Locoregional Recurrence			179	[Not Available]	R0	1	278	1	278	1	179	1	179
TCGA-CC-5263	LIHC	35	MALE	ASIAN	Stage IIIA	[Not Applicable]	Hepatocellular Carcinoma	G1	2010	[Not Available]	-12863	Dead	TUMOR FREE		129	[Not Available]					[Not Available]	RX	1	129	0	129			0	129
TCGA-G3-A25X	LIHC	73	MALE	ASIAN	Stage II	[Not Applicable]	Hepatocellular Carcinoma	G3	2007	[Not Available]	-26988	Alive	TUMOR FREE	1779		[Not Available]					[Not Available]	R0	0	1779	0	1779	0	1779	0	1779
TCGA-WQ-A9G7	LIHC	71	FEMALE	WHITE	[Not Available]	[Not Applicable]	Hepatocellular Carcinoma	G3	2013	[Not Available]		Alive	TUMOR FREE	30		[Not Available]					[Not Available]	R0	0	30	0	30	0	30	0	30
TCGA-G3-A25Z	LIHC	58	MALE	ASIAN	Stage I	[Not Applicable]	Hepatocellular Carcinoma	G2	2010	[Not Available]	-21509	Alive	TUMOR FREE	655		[Not Available]					[Not Available]	R0	0	655	0	655	0	655	0	655
TCGA-DD-AACX	LIHC	66	MALE	ASIAN	Stage II	[Not Applicable]	Hepatocellular Carcinoma	G3	2010	[Not Available]	-24329	Alive	WITH TUMOR	170		[Not Available]	Extrahepatic Recurrence	Other, specify	lymph node	42	[Not Available]	R0	0	170	0	170	1	42	1	42
TCGA-DD-AAE6	LIHC	59	FEMALE	ASIAN	Stage I	[Not Applicable]	Hepatocellular Carcinoma	G2	2012	[Not Available]	-21764	Alive	WITH TUMOR	141		[Not Available]	Intrahepatic Recurrence	Liver		105	[Not Available]	R0	0	141	0	141	1	105	1	105
TCGA-UB-AA0U	LIHC	60	MALE	WHITE	Stage II	[Not Applicable]	Hepatocellular Carcinoma	G2	2013	[Not Available]	-21985	Alive	TUMOR FREE	327		[Not Available]	Intrahepatic Recurrence	Liver		106	[Not Available]	R1	0	327	0	327			1	106
TCGA-RG-A7D4	LIHC	69	MALE	BLACK OR AFRICAN AMERICAN	Stage II	[Not Applicable]	Hepatocellular Carcinoma	G2	2012	[Not Available]	-25302	Alive	TUMOR FREE	1098		[Not Available]					[Not Available]	R0	0	1098	0	1098	0	1098	0	1098
TCGA-MI-A75I	LIHC	61	MALE	BLACK OR AFRICAN AMERICAN	[Not Available]	[Not Applicable]	Hepatocellular Carcinoma	G1	2011	[Not Available]	-22341	Alive		630		[Not Available]		Liver		265	[Not Available]	R0	0	630	0	630	1	265	1	265
TCGA-DD-AAVX	LIHC	38	MALE	ASIAN	Stage II	[Not Applicable]	Hepatocellular Carcinoma	G2	2008	[Not Available]	-14016	Alive	WITH TUMOR	1718		[Not Available]	Intrahepatic Recurrence	Liver		393	[Not Available]	R0	0	1718	0	1718	1	393	1	393
TCGA-EP-A2KC	LIHC	62	MALE	BLACK OR AFRICAN AMERICAN	Stage I	[Not Applicable]	Hepatocellular Carcinoma	G3	2011	[Not Available]	-22677	Dead	TUMOR FREE		19	[Not Available]					[Not Available]	R0	1	19	0	19	0	19	0	19
TCGA-DD-AADN	LIHC	59	MALE	ASIAN	Stage I	[Not Applicable]	Hepatocellular Carcinoma	G4	2012	[Not Available]	-21632	Alive	TUMOR FREE	898		[Not Available]					[Not Available]	R0	0	898	0	898	0	898	0	898
TCGA-DD-A4NV	LIHC	61	MALE	WHITE	Stage IIIA	[Not Applicable]	Hepatocellular Carcinoma	G1	2007	[Not Available]	-22438	Alive	TUMOR FREE	2398		[Not Available]					[Not Available]	R0	0	2398	0	2398	0	2398	0	2398
TCGA-T1-A6J8	LIHC	68	MALE	WHITE	[Not Available]	[Not Applicable]	Hepatocellular Carcinoma	G2	2013	[Not Available]	-24853	Alive	TUMOR FREE	23		[Not Available]					[Not Available]	RX	0	23	0	23			0	23
TCGA-DD-A4NK	LIHC	80	FEMALE	WHITE	Stage IIIA	[Not Applicable]	Hepatocellular Carcinoma	G2	2004	[Not Available]	-29244	Dead	WITH TUMOR		1210	[Not Available]	Intrahepatic Recurrence	Liver		89	[Not Available]	R0	1	1210	1	1210	1	89	1	89
TCGA-CC-A7IJ	LIHC	56	MALE	ASIAN	Stage II	[Not Applicable]	Hepatocellular Carcinoma	G3	2013	[Not Available]	-20751	Alive	TUMOR FREE	382		[Not Available]					[Not Available]	R0	0	382	0	382	0	382	0	382
TCGA-DD-AADR	LIHC	58	MALE	ASIAN	Stage I	[Not Applicable]	Hepatocellular Carcinoma	G3	2009	[Not Available]	-21217	Alive	TUMOR FREE	2028		[Not Available]	Intrahepatic Recurrence	Liver		1700	[Not Available]	R0	0	2028	0	2028	1	1700	1	1700
TCGA-DD-A4NH	LIHC	65	FEMALE	WHITE	Stage IIIB	[Not Applicable]	Hepatocellular Carcinoma	G3	2011	[Not Available]	-23865	Alive	WITH TUMOR	917		[Not Available]	Extrahepatic Recurrence	Lung		161	[Not Available]	R0	0	917	0	917	1	161	1	161
TCGA-BD-A2L6	LIHC	69	MALE	WHITE	[Not Available]	[Not Applicable]	Hepatocellular Carcinoma	G2	2011	[Not Available]	-25489	Alive	WITH TUMOR	1363		[Not Available]	Intrahepatic Recurrence	Liver		415	[Not Available]	R0	0	1363	0	1363	1	415	1	415
TCGA-G3-A3CG	LIHC	80	MALE	WHITE	Stage I	[Not Applicable]	Hepatocellular Carcinoma	G2	2011	[Not Available]	-29432	Alive	WITH TUMOR	673		[Not Available]	Intrahepatic Recurrence	Liver		329	[Not Available]	R1	0	673	0	673			1	329
TCGA-RC-A6M3	LIHC	24	MALE	AMERICAN INDIAN OR ALASKA NATIVE	Stage II	[Not Applicable]	Hepatocellular Carcinoma	G3	2009	[Not Available]	-8899	Alive		0		[Not Available]					[Not Available]	R0	0	0	0	0	0	0	0	0
TCGA-DD-AACB	LIHC	74	FEMALE	ASIAN	Stage I	[Not Applicable]	Hepatocellular Carcinoma	G3	2008	[Not Available]	-27103	Alive	TUMOR FREE	2324		[Not Available]					[Not Available]	R0	0	2324	0	2324	0	2324	0	2324
TCGA-BC-A10Y	LIHC	76	MALE	WHITE	[Not Available]	[Not Applicable]	Hepatocellular Carcinoma	G3	2002	[Not Available]	-28049	Dead	WITH TUMOR		711	[Not Available]	Intrahepatic Recurrence			400	[Not Available]	R0	1	711	1	711	1	400	1	400
TCGA-CC-A9FW	LIHC	68	MALE	ASIAN	Stage IIIA	[Not Applicable]	Hepatocellular Carcinoma	G2	2013	[Not Available]	-24891	Alive	WITH TUMOR	248		[Not Available]	Locoregional Recurrence			153	[Not Available]	R0	0	248	0	248	1	153	1	153
TCGA-DD-A1EL	LIHC	23	MALE	BLACK OR AFRICAN AMERICAN	Stage II	[Not Applicable]	Hepatocellular Carcinoma	G3	2009	[Not Available]	-8573	Dead	WITH TUMOR		415	[Not Available]					[Not Available]	R0	1	415	1	415			1	415
TCGA-DD-AAEE	LIHC	55	MALE	ASIAN	Stage I	[Not Applicable]	Hepatocellular Carcinoma	G4	2012	[Not Available]	-20396	Alive	WITH TUMOR	810		[Not Available]	Intrahepatic Recurrence	Liver		224	[Not Available]	R0	0	810	0	810	1	224	1	224
TCGA-BC-A10W	LIHC	50	MALE	ASIAN	[Not Available]	[Not Applicable]	Hepatocellular Carcinoma	G3	2002	[Not Available]	-18562	Dead	WITH TUMOR		91	[Not Available]					[Not Available]	R1	1	91	1	91			1	91
TCGA-CC-A8HU	LIHC	39	FEMALE	ASIAN	Stage IIIA	[Not Applicable]	Hepatocellular Carcinoma	G3	2013	[Not Available]	-14367	Dead	WITH TUMOR		344	[Not Available]	Locoregional Recurrence			301	[Not Available]	R0	1	344	1	344	1	301	1	301
TCGA-RC-A7SK	LIHC	59	MALE	ASIAN	Stage I	[Not Applicable]	Hepatocellular Carcinoma	G3	2013	[Not Available]	-21814	Alive	TUMOR FREE	472		[Not Available]	Intrahepatic Recurrence	Liver		312	[Not Available]	R0	0	472	0	472	1	312	1	312
TCGA-CC-5258	LIHC	48	MALE	ASIAN	Stage II	[Not Applicable]	Hepatocellular Carcinoma	G2	2010	[Not Available]	-17586	Dead	TUMOR FREE		129	[Not Available]					[Not Available]	RX	1	129	0	129			0	129
TCGA-UB-A7MF	LIHC	56	MALE	WHITE	Stage IIIA	[Not Applicable]	Hepatocellular Carcinoma	G2	2013	[Not Available]	-20815	Dead	WITH TUMOR		214	[Not Available]	Intrahepatic Recurrence	Liver		133	[Not Available]	R0	1	214	1	214	1	133	1	133
TCGA-DD-AACL	LIHC	66	FEMALE	ASIAN	Stage I	[Not Applicable]	Hepatocellular Carcinoma	G3	2008	[Not Available]	-24355	Dead			107	[Not Available]					[Not Available]	R0	1	107		107	0	107	0	107
TCGA-BC-A10T	LIHC	76	MALE	WHITE	[Not Available]	[Not Applicable]	Hepatocellular Carcinoma	G1	2000	[Not Available]	-27944	Dead	WITH TUMOR		837	[Not Available]	Extrahepatic Recurrence	Pulmonary		598	[Not Available]	R1	1	837	1	837			1	598
TCGA-DD-AACE	LIHC	62	MALE	ASIAN	Stage I	[Not Applicable]	Hepatocellular Carcinoma	G3	2008	[Not Available]	-22727	Alive	TUMOR FREE	2184		[Not Available]	Intrahepatic Recurrence	Liver		1279	[Not Available]	R0	0	2184	0	2184	1	1279	1	1279
TCGA-BC-A110	LIHC	51	FEMALE	BLACK OR AFRICAN AMERICAN	[Not Available]	[Not Applicable]	Hepatocellular Carcinoma	G1	2003	[Not Available]	-18951	Dead	WITH TUMOR		2116	[Not Available]	Extrahepatic Recurrence	Other, specify	spleen	2057	[Not Available]	R0	1	2116	1	2116	1	2057	1	2057
TCGA-ED-A7PY	LIHC	20	FEMALE	ASIAN	Stage II	[Not Applicable]	Hepatocellular Carcinoma	G3	2013	[Not Available]	-7556	Alive	TUMOR FREE	390		[Not Available]					[Not Available]	R0	0	390	0	390	0	390	0	390
TCGA-DD-A4NR	LIHC	85	FEMALE	WHITE	Stage I	[Not Applicable]	Hepatocellular Carcinoma	G3	2005	[Not Available]	-31386	Dead	TUMOR FREE		9	[Not Available]					[Not Available]	R0	1	9	0	9	0	9	0	9
TCGA-BC-A8YO	LIHC	66	FEMALE	WHITE	Stage IIIC	[Not Applicable]	Hepatocellular Carcinoma	G3	2013	[Not Available]	-24189	Alive	WITH TUMOR	562		[Not Available]	Locoregional Recurrence	Liver		220	[Not Available]	R0	0	562	0	562	1	220	1	220
TCGA-DD-AADU	LIHC	60	MALE	ASIAN	Stage II	[Not Applicable]	Hepatocellular Carcinoma	G3	2013	[Not Available]	-21940	Alive	TUMOR FREE	554		[Not Available]					[Not Available]	R0	0	554	0	554	0	554	0	554
TCGA-BC-A10Z	LIHC	62	FEMALE	WHITE	Stage I	[Not Applicable]	Hepatocellular Carcinoma	G2	2003	[Not Available]	-22913	Dead	TUMOR FREE		34	[Not Available]					[Not Available]	R0	1	34	0	34	0	34	0	34
TCGA-DD-AACK	LIHC	70	MALE	ASIAN	Stage I	[Not Applicable]	Hepatocellular Carcinoma	G2	2008	[Not Available]	-25796	Alive	TUMOR FREE	9		[Not Available]					[Not Available]	R0	0	9	0	9	0	9	0	9
TCGA-DD-AAEK	LIHC	51	MALE	ASIAN	Stage II	[Not Applicable]	Hepatocellular Carcinoma	G3	2010	[Not Available]	-18757	Alive	TUMOR FREE	1067		[Not Available]					[Not Available]	R0	0	1067	0	1067	0	1067	0	1067
TCGA-DD-AAW3	LIHC	69	MALE	ASIAN	Stage I	[Not Applicable]	Hepatocellular Carcinoma	G2	2009	[Not Available]	-25254	Alive	TUMOR FREE	1633		[Not Available]					[Not Available]	R0	0	1633	0	1633	0	1633	0	1633
TCGA-2Y-A9GZ	LIHC	82	FEMALE	WHITE	Stage II	[Not Applicable]	Hepatocellular Carcinoma	G2	2007	[Not Available]	-30082	Dead	WITH TUMOR		848	[Not Available]	Locoregional Recurrence	Liver		719	[Not Available]	R0	1	848	1	848	1	719	1	719
TCGA-DD-A73F	LIHC	77	FEMALE	WHITE	Stage I	[Not Applicable]	Hepatocellular Carcinoma	G1	2010	[Not Available]	-28234	Alive	TUMOR FREE	1085		[Not Available]					[Not Available]	R0	0	1085	0	1085	0	1085	0	1085
TCGA-DD-AACS	LIHC	39	MALE	ASIAN	Stage I	[Not Applicable]	Hepatocellular Carcinoma	G3	2009	[Not Available]	-14473	Alive	TUMOR FREE	1804		[Not Available]					[Not Available]	R0	0	1804	0	1804	0	1804	0	1804
TCGA-ED-A66Y	LIHC	51	FEMALE	ASIAN	Stage IIIA	[Not Applicable]	Hepatocellular Carcinoma	G3	2013	[Not Available]	-18797	Dead	TUMOR FREE		296	[Not Available]					[Not Available]	R0	1	296	0	296	0	296	0	296
TCGA-G3-A3CJ	LIHC	52	MALE	AMERICAN INDIAN OR ALASKA NATIVE	Stage II	[Not Applicable]	Hepatocellular Carcinoma	G2	2011	[Not Available]	-19305	Alive	WITH TUMOR	594		[Not Available]	Extrahepatic Recurrence	Lung		296	[Not Available]	R0	0	594	0	594	1	296	1	296
TCGA-2Y-A9H2	LIHC	64	FEMALE	WHITE	Stage I	[Not Applicable]	Hepatocellular Carcinoma	G3	2010	[Not Available]	-23653	Alive	TUMOR FREE	1731		[Not Available]					[Not Available]	R0	0	1731	0	1731	0	1731	0	1731
TCGA-ED-A7PZ	LIHC	61	MALE	ASIAN	Stage II	[Not Applicable]	Hepatocellular Carcinoma	G2	2013	[Not Available]	-22601	Alive	TUMOR FREE	6		[Not Available]					[Not Available]	R0	0	6	0	6	0	6	0	6
TCGA-DD-AACI	LIHC	69	MALE	ASIAN	Stage II	[Not Applicable]	Hepatocellular Carcinoma	G3	2008	[Not Available]	-25236	Alive	WITH TUMOR	1618		[Not Available]	Intrahepatic Recurrence	Liver		1432	[Not Available]	R0	0	1618	0	1618	1	1432	1	1432
TCGA-DD-A116	LIHC	68	MALE	ASIAN	Stage IIIA	[Not Applicable]	Hepatocellular Carcinoma	G3	2002	[Not Available]	-24934	Dead	TUMOR FREE		1622	[Not Available]	Extrahepatic Recurrence	Other, specify	sternum	828	[Not Available]	R0	1	1622	0	1622	1	828	1	828	Redacted
TCGA-DD-AAEG	LIHC	59	FEMALE	ASIAN	Stage I	[Not Applicable]	Hepatocellular Carcinoma	G3	2012	[Not Available]	-21853	Alive	TUMOR FREE	719		[Not Available]					[Not Available]	R0	0	719	0	719	0	719	0	719
TCGA-DD-A114	LIHC	42	MALE	BLACK OR AFRICAN AMERICAN	Stage II	[Not Applicable]	Hepatocellular Carcinoma	G3	2005	[Not Available]	-15410	Dead	TUMOR FREE		1149	[Not Available]					[Not Available]	R0	1	1149	0	1149	0	1149	0	1149
TCGA-ZS-A9CF	LIHC	64	MALE	WHITE	Stage II	[Not Applicable]	Hepatocellular Carcinoma	G2	2008	[Not Available]	-23510	Alive	TUMOR FREE	2412		[Not Available]	Intrahepatic Recurrence	Liver		636	[Not Available]	R0	0	2412	0	2412	1	636	1	636
TCGA-RC-A6M6	LIHC	75	MALE	WHITE	Stage II	[Not Applicable]	Hepatocellular Carcinoma	G3	2011	[Not Available]	-27649	Alive		9		[Not Available]					[Not Available]	R1	0	9	0	9			0	9
TCGA-5R-AA1C	LIHC	57	MALE	WHITE	Stage II	[Not Applicable]	Hepatocellular Carcinoma	G2	2013	[Not Available]	-21073	Alive	TUMOR FREE	520		[Not Available]					[Not Available]	R0	0	520	0	520	0	520	0	520
TCGA-CC-5262	LIHC	67	MALE	ASIAN	Stage IIIC	[Not Applicable]	Hepatocellular Carcinoma	G1	2010	[Not Available]	-24787	Dead	TUMOR FREE		103	[Not Available]					[Not Available]	[Not Available]	1	103	0	103			0	103
TCGA-DD-AACO	LIHC	40	MALE	ASIAN	Stage I	[Not Applicable]	Hepatocellular Carcinoma	G3	2009	[Not Available]	-14796	Alive	WITH TUMOR	1876		[Not Available]	Intrahepatic Recurrence	Liver		479	[Not Available]	R0	0	1876	0	1876	1	479	1	479
TCGA-ZP-A9CY	LIHC	66	FEMALE	WHITE	[Not Available]	[Not Applicable]	Hepatocellular Carcinoma	G1	2011	[Not Available]	-24223	Alive	TUMOR FREE	782		[Not Available]					[Not Available]	R0	0	782	0	782	0	782	0	782
TCGA-ZP-A9D4	LIHC	64	FEMALE	WHITE	[Not Available]	[Not Applicable]	Hepatocellular Carcinoma	G1	2012	[Not Available]	-23656	Alive	TUMOR FREE	395		[Not Available]					[Not Available]	R0	0	395	0	395	0	395	0	395
TCGA-ZS-A9CE	LIHC	79	FEMALE	WHITE	Stage II	[Not Applicable]	Hepatocellular Carcinoma	G1	2011	[Not Available]	-29051	Alive	TUMOR FREE	1241		[Not Available]	New Primary Tumor	Other, specify	Right Temple	892	[Not Available]	R0	0	1241	0	1241	0	1241	1	892
TCGA-DD-AAVS	LIHC	56	MALE	ASIAN	Stage I	[Not Applicable]	Hepatocellular Carcinoma	G2	2007	[Not Available]	-20586	Alive	TUMOR FREE	1823		[Not Available]					[Not Available]	R0	0	1823	0	1823	0	1823	0	1823
TCGA-XR-A8TC	LIHC	43	FEMALE	WHITE	Stage I	[Not Applicable]	Hepatocellular Carcinoma	G2	2011	[Not Available]	-15817	Alive	WITH TUMOR	1339		[Not Available]					[Not Available]	R0	0	1339	0	1339	0	1339	0	1339
TCGA-DD-A39W	LIHC	29	FEMALE	WHITE	Stage III	[Not Applicable]	Hepatocellular Carcinoma	G2	1995	[Not Available]	-10699	Dead			827	[Not Available]					[Not Available]	R0	1	827		827	0	827	0	827
TCGA-BC-A69H	LIHC	64	MALE	WHITE	Stage II	[Not Applicable]	Hepatocellular Carcinoma	G3	2013	[Not Available]	-23380	Alive	TUMOR FREE	444		[Not Available]					[Not Available]	R0	0	444	0	444	0	444	0	444
TCGA-DD-A4NA	LIHC	67	FEMALE	WHITE	Stage IIIC	[Not Applicable]	Hepatocellular Carcinoma	G3	2009	[Not Available]	-24603	Alive	TUMOR FREE	1008		[Not Available]					[Not Available]	R0	0	1008	0	1008	0	1008	0	1008
TCGA-MI-A75E	LIHC	61	MALE	WHITE	Stage IIIC	[Not Applicable]	Hepatocellular Carcinoma	G2	2013	[Not Available]	-22457	Alive	TUMOR FREE	507		[Not Available]					[Not Available]	R0	0	507	0	507	0	507	0	507
TCGA-DD-AAVZ	LIHC	38	MALE	ASIAN	Stage I	[Not Applicable]	Hepatocellular Carcinoma	G2	2009	[Not Available]	-14005	Alive	TUMOR FREE	1900		[Not Available]					[Not Available]	R0	0	1900	0	1900	0	1900	0	1900
TCGA-G3-A5SL	LIHC	70	MALE	WHITE	Stage II	[Not Applicable]	Hepatocellular Carcinoma	G2	2012	[Not Available]	-25671	Alive	TUMOR FREE	621		[Not Available]					[Not Available]	R0	0	621	0	621	0	621	0	621
TCGA-ED-A7XP	LIHC	53	FEMALE	ASIAN	Stage II	[Not Applicable]	Hepatocellular Carcinoma	G3	2013	[Not Available]	-19504	Alive	WITH TUMOR	400		[Not Available]	Locoregional Recurrence	Liver		187	[Not Available]	R0	0	400	0	400	1	187	1	187
TCGA-EP-A2KB	LIHC	46	FEMALE	WHITE	Stage I	[Not Applicable]	Hepatocellular Carcinoma	G2	2011	[Not Available]	-16835	Dead	WITH TUMOR		596	[Not Available]	Intrahepatic Recurrence	Liver		161	[Not Available]	R0	1	596	1	596	1	161	1	161
TCGA-DD-A4NI	LIHC	67	MALE	WHITE	Stage II	[Not Applicable]	Hepatocellular Carcinoma	G2	2011	[Not Available]	-24516	Alive	TUMOR FREE	816		[Not Available]					[Not Available]	R0	0	816	0	816	0	816	0	816
TCGA-CC-A9FV	LIHC	57	MALE	ASIAN	Stage IIIA	[Not Applicable]	Hepatocellular Carcinoma	G2	2013	[Not Available]	-21044	Alive	TUMOR FREE	0		[Not Available]					[Not Available]	R0	0	0	0	0	0	0	0	0
TCGA-WQ-AB4B	LIHC	62	MALE	WHITE	Stage II	[Not Applicable]	Hepatocellular Carcinoma	G2	2013	[Not Available]	-22769	Alive	WITH TUMOR	395		[Not Available]	Intrahepatic Recurrence			273	[Not Available]	R0	0	395	0	395	1	273	1	273
TCGA-G3-AAV1	LIHC	51	MALE	ASIAN	Stage IIIC	[Not Applicable]	Hepatocellular Carcinoma	G3	2013	[Not Available]	-18973	Dead	WITH TUMOR		359	[Not Available]	Locoregional Recurrence	Liver		49	[Not Available]	R0	1	359	1	359	1	49	1	49
TCGA-CC-A3MC	LIHC	54	MALE	ASIAN	Stage IIIA	[Not Applicable]	Hepatocellular Carcinoma	G2	2011	[Not Available]	-20067	Alive	WITH TUMOR	363		[Not Available]	Locoregional Recurrence	Liver		297	[Not Available]	R0	0	363	0	363	1	297	1	297
TCGA-G3-AAUZ	LIHC	48	MALE	[Unknown]	Stage I	[Not Applicable]	Hepatocellular Carcinoma	G2	2013	[Not Available]	-17760	Alive	TUMOR FREE	480		[Not Available]					[Not Available]	R0	0	480	0	480	0	480	0	480
TCGA-DD-AACM	LIHC	48	MALE	ASIAN	Stage II	[Not Applicable]	Hepatocellular Carcinoma	G3	2009	[Not Available]	-17590	Alive	WITH TUMOR	1769		[Not Available]	Extrahepatic Recurrence	Lung		1097	[Not Available]	R0	0	1769	0	1769	1	1097	1	1097
TCGA-DD-A11D	LIHC	57	FEMALE	WHITE	Stage I	[Not Applicable]	Hepatocellular Carcinoma	G2	2006	[Not Available]	-21003	Dead	WITH TUMOR		1560	[Not Available]	Intrahepatic Recurrence	Liver		498	[Not Available]	R0	1	1560	1	1560	1	498	1	498
TCGA-DD-AACF	LIHC	68	MALE	ASIAN	Stage I	[Not Applicable]	Hepatocellular Carcinoma	G3	2008	[Not Available]	-25172	Dead	WITH TUMOR		365	[Not Available]	Locoregional Recurrence	Liver		119	[Not Available]	R0	1	365	1	365	1	119	1	119
TCGA-BD-A3EP	LIHC	75	FEMALE	BLACK OR AFRICAN AMERICAN	Stage I	[Not Applicable]	Hepatocellular Carcinoma	G2	2010	[Not Available]	-27756	Alive	TUMOR FREE	409		[Not Available]					[Not Available]	R0	0	409	0	409	0	409	0	409
TCGA-ED-A4XI	LIHC	58	MALE	ASIAN	Stage II	[Not Applicable]	Hepatocellular Carcinoma	G3	2012	[Not Available]	-21497	Alive	TUMOR FREE	819		[Not Available]					[Not Available]	R0	0	819	0	819	0	819	0	819
TCGA-DD-A11A	LIHC	67	MALE	BLACK OR AFRICAN AMERICAN	Stage I	[Not Applicable]	Hepatocellular Carcinoma	G3	2004	[Not Available]	-24646	Alive		79		[Not Available]					[Not Available]	R0	0	79	0	79	0	79	0	79
TCGA-QA-A7B7	LIHC	48	MALE	BLACK OR AFRICAN AMERICAN	Stage II	[Not Applicable]	Hepatocellular Carcinoma	G2	2013	[Not Available]	-17636	Alive	WITH TUMOR	94		[Not Available]	Locoregional Recurrence	Liver		88	[Not Available]	RX	0	94	0	94			1	88
TCGA-DD-AADL	LIHC	58	MALE	ASIAN	Stage I	[Not Applicable]	Hepatocellular Carcinoma	G4	2012	[Not Available]	-21512	Alive	TUMOR FREE	636		[Not Available]					[Not Available]	R0	0	636	0	636	0	636	0	636
TCGA-2Y-A9H6	LIHC	68	FEMALE	WHITE	Stage I	[Not Applicable]	Hepatocellular Carcinoma	G2	2011	[Not Available]	-24982	Alive		357		[Not Available]					[Not Available]	R0	0	357	0	357	0	357	0	357
TCGA-2Y-A9GY	LIHC	64	FEMALE	WHITE	Stage II	[Not Applicable]	Hepatocellular Carcinoma	G3	2007	[Not Available]	-23435	Dead	WITH TUMOR		757	[Not Available]	Extrahepatic Recurrence	Lung		637	[Not Available]	R0	1	757	1	757	1	637	1	637
TCGA-DD-A73E	LIHC	66	MALE	WHITE	Stage I	[Not Applicable]	Hepatocellular Carcinoma	G1	2012	[Not Available]	-24377	Alive	TUMOR FREE	44		[Not Available]					[Not Available]	R0	0	44	0	44	0	44	0	44
TCGA-RC-A7SF	LIHC	66	MALE	ASIAN	Stage I	[Not Applicable]	Hepatocellular Carcinoma	G2	2012	[Not Available]	-24432	Alive	WITH TUMOR	579		[Not Available]	Locoregional Recurrence	Liver		502	[Not Available]	R0	0	579	0	579	1	502	1	502
TCGA-BC-A3KG	LIHC	68	FEMALE	WHITE	Stage II	[Not Applicable]	Hepatocellular Carcinoma	G3	2011	[Not Available]	-25061	Alive	WITH TUMOR	680		[Not Available]	Intrahepatic Recurrence	Liver		209	[Not Available]	R0	0	680	0	680	1	209	1	209
TCGA-DD-AAVP	LIHC	48	MALE	ASIAN	Stage I	[Not Applicable]	Hepatocellular Carcinoma	G1	2007	[Not Available]	-17833	Alive	TUMOR FREE	2752		[Not Available]	Locoregional Recurrence	Liver		903	[Not Available]	R0	0	2752	0	2752	1	903	1	903
TCGA-ED-A459	LIHC	47	MALE	ASIAN	Stage II	[Not Applicable]	Hepatocellular Carcinoma	G2	2012	[Not Available]	-17402	Alive	TUMOR FREE	910		[Not Available]					[Not Available]	R0	0	910	0	910	0	910	0	910
TCGA-DD-AACW	LIHC	43	MALE	ASIAN	Stage I	[Not Applicable]	Hepatocellular Carcinoma	G3	2010	[Not Available]	-15872	Alive	TUMOR FREE	1424		[Not Available]					[Not Available]	R0	0	1424	0	1424	0	1424	0	1424
TCGA-3K-AAZ8	LIHC	65	MALE	BLACK OR AFRICAN AMERICAN	Stage IIIB	[Not Applicable]	Hepatocellular Carcinoma	G1	2013	[Not Available]	-24046	Alive	WITH TUMOR	396		[Not Available]	Locoregional Recurrence	Liver		151	[Not Available]	RX	0	396	0	396			1	151
TCGA-G3-A7M5	LIHC	76	MALE	ASIAN	Stage I	[Not Applicable]	Hepatocellular Carcinoma	G2	2013	[Not Available]	-27963	Alive	TUMOR FREE	447		[Not Available]					[Not Available]	R0	0	447	0	447	0	447	0	447
TCGA-FV-A3R2	LIHC	75	MALE	WHITE	Stage I	[Not Applicable]	Hepatocellular Carcinoma	[Not Available]	2005	[Not Available]	-27530	Dead	TUMOR FREE		194	[Not Available]					[Not Available]	R0	1	194	0	194	0	194	0	194
TCGA-BD-A3ER	LIHC	62	MALE	WHITE	Stage II	[Not Applicable]	Hepatocellular Carcinoma	G2	2011	[Not Available]	-22657	Alive	WITH TUMOR	1115		[Not Available]	Locoregional Recurrence	Liver		226	[Not Available]	R0	0	1115	0	1115	1	226	1	226
TCGA-DD-AADY	LIHC	55	FEMALE	ASIAN	Stage I	[Not Applicable]	Hepatocellular Carcinoma	G2	2013	[Not Available]	-20233	Alive	TUMOR FREE	555		[Not Available]					[Not Available]	R0	0	555	0	555	0	555	0	555
TCGA-DD-AACY	LIHC	61	MALE	ASIAN	Stage I	[Not Applicable]	Hepatocellular Carcinoma	G3	2010	[Not Available]	-22332	Alive	WITH TUMOR	1450		[Not Available]	Intrahepatic Recurrence	Liver		776	[Not Available]	R0	0	1450	0	1450	1	776	1	776
TCGA-DD-A1EI	LIHC	46	MALE	ASIAN	Stage I	[Not Applicable]	Hepatocellular Carcinoma	G2	2008	[Not Available]	-17097	Alive	TUMOR FREE	183		[Not Available]					[Not Available]	R0	0	183	0	183	0	183	0	183
TCGA-2Y-A9HB	LIHC	66	MALE	[Not Evaluated]	Stage I	[Not Applicable]	Hepatocellular Carcinoma	G2	2012	[Not Available]	-24359	Alive	TUMOR FREE	260		[Not Available]					[Not Available]	R0	0	260	0	260	0	260	0	260
TCGA-CC-A123	LIHC	24	FEMALE	ASIAN	Stage IIIA	[Not Applicable]	Hepatocellular Carcinoma	G1	2010	[Not Available]	-9107	Alive	WITH TUMOR	219		[Not Available]	New Primary Tumor	Lung		145	[Not Available]	RX	0	219	0	219			1	145
TCGA-XR-A8TE	LIHC	16	MALE	WHITE	Stage IIIA	[Not Applicable]	Hepatocellular Carcinoma	G1	2012	[Not Available]	-5862	Alive	WITH TUMOR	925		[Not Available]	Intrahepatic Recurrence	Liver		210	[Not Available]	R0	0	925	0	925	1	210	1	210
TCGA-CC-A8HT	LIHC	74	MALE	ASIAN	Stage IIIA	[Not Applicable]	Hepatocellular Carcinoma	G2	2013	[Not Available]	-27334	Dead	WITH TUMOR		140	[Not Available]	Locoregional Recurrence			83	[Not Available]	R0	1	140	1	140	1	83	1	83
TCGA-G3-A5SM	LIHC	58	MALE	WHITE	Stage II	[Not Applicable]	Hepatocellular Carcinoma	G3	2012	[Not Available]	-21236	Alive	TUMOR FREE	520		[Not Available]	Intrahepatic Recurrence	Liver		252	[Not Available]	R0	0	520	0	520	1	252	1	252
TCGA-ES-A2HS	LIHC	80	MALE	WHITE	Stage I	[Not Applicable]	Hepatocellular Carcinoma	G2	2008	[Not Available]	-29268	Dead	TUMOR FREE		688	[Not Available]					[Not Available]	R0	1	688	0	688	0	688	0	688
TCGA-FV-A2QQ	LIHC	80	MALE	WHITE	Stage I	[Not Applicable]	Hepatocellular Carcinoma	G2	2011	[Not Available]	-29354	Alive	TUMOR FREE	729		[Not Available]					[Not Available]	R0	0	729	0	729	0	729	0	729
TCGA-DD-AACU	LIHC	59	MALE	ASIAN	Stage I	[Not Applicable]	Hepatocellular Carcinoma	G3	2010	[Not Available]	-21606	Alive	TUMOR FREE	1567		[Not Available]					[Not Available]	R0	0	1567	0	1567	0	1567	0	1567
TCGA-RC-A7SH	LIHC	42	MALE	ASIAN	Stage II	[Not Applicable]	Hepatocellular Carcinoma	G3	2012	[Not Available]	-15560	Alive	WITH TUMOR	468		[Not Available]	Extrahepatic Recurrence	Lung		91	[Not Available]	R0	0	468	0	468	1	91	1	91
TCGA-ZP-A9D2	LIHC	51	MALE	WHITE	[Not Available]	[Not Applicable]	Hepatocellular Carcinoma	G2	2012	[Not Available]	-18717	Dead	WITH TUMOR		765	[Not Available]	Intrahepatic Recurrence	Liver		315	[Not Available]	R0	1	765	1	765	1	315	1	315
TCGA-DD-AACT	LIHC	69	FEMALE	ASIAN	Stage I	[Not Applicable]	Hepatocellular Carcinoma	G2	2010	[Not Available]	-25292	Alive	TUMOR FREE	1562		[Not Available]					[Not Available]	R0	0	1562	0	1562	0	1562	0	1562
TCGA-DD-AADG	LIHC	70	MALE	ASIAN	Stage IIIA	[Not Applicable]	Hepatocellular Carcinoma	G3	2011	[Not Available]	-25887	Alive	TUMOR FREE	1145		[Not Available]	Intrahepatic Recurrence	Liver		270	[Not Available]	R0	0	1145	0	1145	1	270	1	270
TCGA-2Y-A9H0	LIHC	49	MALE	WHITE	Stage IIIA	[Not Applicable]	Hepatocellular Carcinoma	G1	2004	[Not Available]	-18109	Alive	TUMOR FREE	3675		[Not Available]					[Not Available]	R0	0	3675	0	3675	0	3675	0	3675
TCGA-G3-AAV6	LIHC	53	FEMALE	WHITE	Stage IIIA	[Not Applicable]	Hepatocellular Carcinoma	G3	2013	[Not Available]	-19556	Dead	WITH TUMOR		65	[Not Available]	Intrahepatic Recurrence	Liver		44	[Not Available]	R0	1	65	1	65	1	44	1	44
TCGA-DD-A73D	LIHC	68	FEMALE	WHITE	Stage II	[Not Applicable]	Hepatocellular Carcinoma	G1	2012	[Not Available]	-24941	Alive	WITH TUMOR	693		[Not Available]	Intrahepatic Recurrence	Liver		592	[Not Available]	R0	0	693	0	693	1	592	1	592
TCGA-FV-A2QR	LIHC	75	MALE	WHITE	Stage I	[Not Applicable]	Hepatocellular Carcinoma	G1	2006	[Not Available]		Dead	WITH TUMOR		581	[Not Available]	Extrahepatic Recurrence			561	[Not Available]	RX	1	581	1	581			1	561
TCGA-DD-AADK	LIHC	68	FEMALE	ASIAN	Stage II	[Not Applicable]	Hepatocellular Carcinoma	G3	2011	[Not Available]	-25046	Alive	TUMOR FREE	1049		[Not Available]					[Not Available]	R0	0	1049	0	1049	0	1049	0	1049
TCGA-DD-A4NE	LIHC	75	FEMALE	WHITE	Stage IIIA	[Not Applicable]	Hepatocellular Carcinoma	G3	2011	[Not Available]	-27549	Dead	WITH TUMOR		660	[Not Available]	Locoregional Recurrence	Liver		190	[Not Available]	R0	1	660	1	660	1	190	1	190
TCGA-CC-A7IG	LIHC	47	MALE	ASIAN	Stage II	[Not Applicable]	Hepatocellular Carcinoma	G2	2013	[Not Available]	-17453	Dead	WITH TUMOR		299	[Not Available]	Locoregional Recurrence			195	[Not Available]	R0	1	299	1	299	1	195	1	195
TCGA-DD-A1EB	LIHC	72	FEMALE	[Not Available]	Stage I	[Not Applicable]	Hepatocellular Carcinoma	G2	2001	[Not Available]	-26471	Alive	[Discrepancy]	2017		[Not Available]	Intrahepatic Recurrence	Liver		505	[Not Available]	R0	0	2017	0	2017	1	505	1	505
TCGA-DD-A118	LIHC	77	FEMALE	WHITE	Stage II	[Not Applicable]	Hepatocellular Carcinoma	G2	2003	[Not Available]	-28406	Alive		3437		[Not Available]	Extrahepatic Recurrence	Other, specify	lateral to the C-loop of the duodenum, anterior to the right kidney	658	[Not Available]	R0	0	3437	0	3437	1	658	1	658
TCGA-5R-AAAM	LIHC	65	FEMALE	WHITE	Stage II	[Not Applicable]	Hepatocellular Carcinoma	G2	2013	[Not Available]	-24020	Dead	TUMOR FREE		46	[Not Available]					[Not Available]	R0	1	46	0	46	0	46	0	46
TCGA-DD-AAVQ	LIHC	38	MALE	ASIAN	Stage I	[Not Applicable]	Hepatocellular Carcinoma	G2	2007	[Not Available]	-13911	Alive	TUMOR FREE	2728		[Not Available]	Locoregional Recurrence	Liver		1509	[Not Available]	R0	0	2728	0	2728	1	1509	1	1509
TCGA-G3-A25U	LIHC	63	FEMALE	ASIAN	Stage I	[Not Applicable]	Hepatocellular Carcinoma	G3	2007	[Not Available]	-23207	Alive	TUMOR FREE	1636		[Not Available]					[Not Available]	R0	0	1636	0	1636	0	1636	0	1636
TCGA-G3-A7M8	LIHC	31	MALE	ASIAN	Stage I	[Not Applicable]	Hepatocellular Carcinoma	G1	2013	[Not Available]	-11527	Alive	TUMOR FREE	430		[Not Available]					[Not Available]	RX	0	430	0	430			0	430
TCGA-DD-A3A5	LIHC	66	FEMALE	WHITE	Stage III	[Not Applicable]	Hepatocellular Carcinoma	G2	1996	[Not Available]	-24288	Dead	WITH TUMOR		3125	[Not Available]	Intrahepatic Recurrence	Liver		84	[Not Available]	R0	1	3125	1	3125	1	84	1	84
TCGA-DD-AACZ	LIHC	63	FEMALE	ASIAN	Stage I	[Not Applicable]	Hepatocellular Carcinoma	G4	2010	[Not Available]	-23230	Dead	TUMOR FREE		171	[Not Available]	Locoregional Recurrence	Liver		88	[Not Available]	R0	1	171	0	171	1	88	1	88
TCGA-BC-A217	LIHC	75	FEMALE	WHITE	Stage II	[Not Applicable]	Hepatocellular Carcinoma	G3	2010	[Not Available]	-27411	Dead	TUMOR FREE		1397	[Not Available]					[Not Available]	R0	1	1397	0	1397	0	1397	0	1397
TCGA-ED-A7XO	LIHC	29	MALE	ASIAN	Stage IIIA	[Not Applicable]	Hepatocellular Carcinoma	G2	2013	[Not Available]	-10828	Alive	WITH TUMOR	427		[Not Available]	Locoregional Recurrence	Liver		262	[Not Available]	R0	0	427	0	427	1	262	1	262
TCGA-FV-A495	LIHC	51	FEMALE	WHITE	Stage II	[Not Applicable]	Hepatocellular Carcinoma	G2	2012	[Not Available]	-18740	Alive	TUMOR FREE	1		[Not Available]					[Not Available]	R0	0	1	0	1	0	1	0	1
TCGA-DD-A1EH	LIHC	23	MALE	WHITE	Stage III	[Not Applicable]	Hepatocellular Carcinoma	G3	2008	[Not Available]	-8499	Alive	WITH TUMOR	1495		[Not Available]	Intrahepatic Recurrence	Liver		120	[Not Available]	R0	0	1495	0	1495	1	120	1	120
TCGA-FV-A23B	LIHC	70	FEMALE	WHITE	Stage II	[Not Applicable]	Hepatocellular Carcinoma	[Not Available]	2005	[Not Available]	-25788	Dead	WITH TUMOR		1852	[Not Available]	Locoregional Recurrence	Liver		1453	[Not Available]	R0	1	1852	1	1852	1	1453	1	1453
TCGA-MI-A75C	LIHC	64	MALE	WHITE	Stage I	[Not Applicable]	Hepatocellular Carcinoma	G3	2012	[Not Available]	-23441	Alive	TUMOR FREE	291		[Not Available]					[Not Available]	R0	0	291	0	291	0	291	0	291
TCGA-DD-A4NP	LIHC	32	MALE	WHITE	Stage I	[Not Applicable]	Hepatocellular Carcinoma	G3	2005	[Not Available]	-11838	Alive	TUMOR FREE	3308		[Not Available]	Intrahepatic Recurrence	Liver		1286	[Not Available]	R0	0	3308	0	3308	1	1286	1	1286
TCGA-DD-AADF	LIHC	64	FEMALE	ASIAN	Stage I	[Not Applicable]	Hepatocellular Carcinoma	G4	2011	[Not Available]	-23614	Dead	TUMOR FREE		115	[Not Available]					[Not Available]	R0	1	115	0	115	0	115	0	115
TCGA-DD-AAEA	LIHC	65	MALE	ASIAN	Stage I	[Not Applicable]	Hepatocellular Carcinoma	G3	2012	[Not Available]	-24027	Alive	TUMOR FREE	575		[Not Available]					[Not Available]	R0	0	575	0	575	0	575	0	575
TCGA-EP-A3RK	LIHC	73	MALE	WHITE	Stage IIIA	[Not Applicable]	Hepatocellular Carcinoma	G2	2012	[Not Available]	-26985	Alive	WITH TUMOR	363		[Not Available]	Locoregional Recurrence	Liver		320	[Not Available]	[Not Available]	0	363	0	363			1	320
TCGA-BC-4072	LIHC	74	FEMALE	WHITE	Stage IIIA	[Not Applicable]	Hepatocellular Carcinoma	G3	2005	[Not Available]	-27162	Dead	WITH TUMOR		1490	[Not Available]	Extrahepatic Recurrence	Lymph Node(s)		475	[Not Available]	R1	1	1490	1	1490			1	475
TCGA-FV-A3I0	LIHC	76	FEMALE	WHITE	Stage II	[Not Applicable]	Hepatocholangiocarcinoma (Mixed)	G2	2011	[Not Available]	-28101	Alive	WITH TUMOR	848		[Not Available]	Intrahepatic Recurrence	Liver		159	[Not Available]	R0	0	848	0	848	1	159	1	159
TCGA-UB-A7MB	LIHC	24	MALE	WHITE	Stage II	[Not Applicable]	Hepatocellular Carcinoma	G3	2013	[Not Available]	-8951	Alive	WITH TUMOR	601		[Not Available]	Intrahepatic Recurrence	Liver		48	[Not Available]	R0	0	601	0	601	1	48	1	48
TCGA-ZP-A9CZ	LIHC	72	MALE	ASIAN	[Not Available]	[Not Applicable]	Hepatocellular Carcinoma	G1	2011	[Not Available]	-26403	Alive	TUMOR FREE	706		[Not Available]					[Not Available]	R0	0	706	0	706	0	706	0	706
TCGA-MI-A75H	LIHC	77	MALE	WHITE	[Not Available]	[Not Applicable]	Hepatocellular Carcinoma	[Not Available]	2012	[Not Available]	-28371	Alive	WITH TUMOR	747		[Not Available]	Locoregional Recurrence	Liver		301	[Not Available]	R0	0	747	0	747	1	301	1	301
TCGA-G3-A5SJ	LIHC	59	MALE	WHITE	Stage I	[Not Applicable]	Hepatocellular Carcinoma	G2	2012	[Not Available]	-21848	Alive	TUMOR FREE	698		[Not Available]	Intrahepatic Recurrence	Liver		308	[Not Available]	R0	0	698	0	698	1	308	1	308
TCGA-DD-AAD0	LIHC	73	FEMALE	ASIAN	Stage I	[Not Applicable]	Hepatocellular Carcinoma	G2	2010	[Not Available]	-26781	Alive	WITH TUMOR	137		[Not Available]	Intrahepatic Recurrence	Liver		47	[Not Available]	R0	0	137	0	137	1	47	1	47
TCGA-ED-A82E	LIHC	60	FEMALE	ASIAN	Stage IIIA	[Not Applicable]	Hepatocellular Carcinoma	G2	2013	[Not Available]	-22234	Alive	TUMOR FREE	408		[Not Available]					[Not Available]	R0	0	408	0	408	0	408	0	408
TCGA-BC-A5W4	LIHC	69	MALE	WHITE	Stage IIIA	[Not Applicable]	Hepatocellular Carcinoma	G3	2012	[Not Available]	-25503	Dead	TUMOR FREE		547	[Not Available]	Locoregional Recurrence			384	[Not Available]	R1	1	547	0	547			1	384
TCGA-DD-AAEI	LIHC	72	MALE	ASIAN	Stage I	[Not Applicable]	Hepatocellular Carcinoma	G2	2010	[Not Available]	-26465	Alive	WITH TUMOR	1531		[Not Available]	Extrahepatic Recurrence	Bone		491	[Not Available]	R0	0	1531	0	1531	1	491	1	491
TCGA-2Y-A9GT	LIHC	51	MALE	WHITE	Stage I	[Not Applicable]	Hepatocellular Carcinoma	G2	2006	[Not Available]	-18768	Dead	WITH TUMOR		1624	[Not Available]	Locoregional Recurrence	Liver		1083	[Not Available]	R0	1	1624	1	1624	1	1083	1	1083
TCGA-XR-A8TD	LIHC	49	FEMALE	WHITE	Stage IIIB	[Not Applicable]	Hepatocellular Carcinoma	G3	2012	[Not Available]	-17908	Alive	TUMOR FREE	1030		[Not Available]					[Not Available]	R0	0	1030	0	1030	0	1030	0	1030
TCGA-2Y-A9H4	LIHC	68	MALE	BLACK OR AFRICAN AMERICAN	Stage I	[Not Applicable]	Hepatocellular Carcinoma	G2	2010	[Not Available]	-25096	Alive	TUMOR FREE	1452		[Not Available]					[Not Available]	R0	0	1452	0	1452	0	1452	0	1452
TCGA-DD-AACD	LIHC	48	MALE	ASIAN	Stage I	[Not Applicable]	Hepatocellular Carcinoma	G4	2008	[Not Available]	-17828	Dead	WITH TUMOR		381	[Not Available]	Locoregional Recurrence	Lung		151	[Not Available]	R0	1	381	1	381	1	151	1	151
TCGA-BC-A112	LIHC	80	MALE	WHITE	[Not Available]	[Not Applicable]	Hepatocellular Carcinoma	G2	2009	[Not Available]	-29511	Dead	TUMOR FREE		153	[Not Available]					[Not Available]	R0	1	153	0	153	0	153	0	153
TCGA-2Y-A9GV	LIHC	54	FEMALE	WHITE	Stage I	[Not Applicable]	Hepatocellular Carcinoma	G1	2007	[Not Available]	-20011	Dead	WITH TUMOR		2532	[Not Available]	New Primary Tumor	Other, specify	Renal met from prior lung primary	1745	[Not Available]	R0	1	2532	1	2532	0	2532	1	1745
TCGA-DD-AADJ	LIHC	70	FEMALE	ASIAN	Stage I	[Not Applicable]	Hepatocellular Carcinoma	G3	2011	[Not Available]	-25863	Alive	TUMOR FREE	1066		[Not Available]					[Not Available]	R0	0	1066	0	1066	0	1066	0	1066
TCGA-CC-5260	LIHC	61	FEMALE	ASIAN	Stage IIIC	[Not Applicable]	Hepatocellular Carcinoma	G1	2010	[Not Available]	-22345	Dead	TUMOR FREE		87	[Not Available]					[Not Available]	RX	1	87	0	87			0	87
TCGA-LG-A6GG	LIHC	79	FEMALE	WHITE	Stage II	[Not Applicable]	Hepatocellular Carcinoma	G2	2013	[Not Available]	-28871	Alive	TUMOR FREE	387		[Not Available]					[Not Available]	R0	0	387	0	387	0	387	0	387
TCGA-G3-AAV0	LIHC	58	MALE	ASIAN	Stage I	[Not Applicable]	Hepatocellular Carcinoma	G2	2013	[Not Available]	-21249	Alive	TUMOR FREE	476		[Not Available]					[Not Available]	R0	0	476	0	476	0	476	0	476
TCGA-DD-AACQ	LIHC	50	MALE	ASIAN	Stage II	[Not Applicable]	Hepatocellular Carcinoma	G3	2009	[Not Available]	-18429	Dead	WITH TUMOR		432	[Not Available]	Locoregional Recurrence	Liver		105	[Not Available]	R0	1	432	1	432	1	105	1	105
TCGA-KR-A7K7	LIHC	61	FEMALE	WHITE	Stage II	[Not Applicable]	Hepatocellular Carcinoma	G1	2012	[Not Available]	-22587	Alive	WITH TUMOR	951		[Not Available]	Extrahepatic Recurrence	Other, specify	Adrenal bilateral	239	[Not Available]	R0	0	951	0	951	1	239	1	239
TCGA-DD-A4NJ	LIHC	54	FEMALE	WHITE	Stage II	[Not Applicable]	Hepatocellular Carcinoma	G2	2011	[Not Available]	-19964	Alive	WITH TUMOR	928		[Not Available]	Intrahepatic Recurrence	Liver		549	[Not Available]	R0	0	928	0	928	1	549	1	549
TCGA-DD-AAVV	LIHC	56	MALE	ASIAN	Stage II	[Not Applicable]	Hepatocellular Carcinoma	G3	2007	[Not Available]	-20751	Alive	TUMOR FREE	2455		[Not Available]					[Not Available]	R0	0	2455	0	2455	0	2455	0	2455
TCGA-DD-AAC8	LIHC	72	MALE	ASIAN	Stage I	[Not Applicable]	Hepatocellular Carcinoma	G3	2008	[Not Available]	-26322	Dead	TUMOR FREE		16	[Not Available]					[Not Available]	R0	1	16	0	16	0	16	0	16
TCGA-G3-A25W	LIHC	79	FEMALE	WHITE	Stage IIIB	[Not Applicable]	Hepatocellular Carcinoma	G2	2010	[Not Available]	-29018	Alive	TUMOR FREE	935		[Not Available]					[Not Available]	R0	0	935	0	935	0	935	0	935
TCGA-WJ-A86L	LIHC	68	FEMALE	WHITE	Stage I	[Not Applicable]	Hepatocellular Carcinoma	G2	2013	[Not Available]	-25018	Alive	TUMOR FREE	345		[Not Available]					[Not Available]	R0	0	345	0	345	0	345	0	345
TCGA-CC-A3MB	LIHC	36	MALE	ASIAN	Stage IIIA	[Not Applicable]	Hepatocellular Carcinoma	G1	2011	[Not Available]	-13255	Dead	WITH TUMOR		315	[Not Available]	New Primary Tumor	Lung		260	[Not Available]	R0	1	315	1	315	0	315	1	260
TCGA-G3-A7M7	LIHC	65	MALE	WHITE	Stage I	[Not Applicable]	Hepatocellular Carcinoma	G1	2013	[Not Available]	-24002	Alive	TUMOR FREE	361		[Not Available]					[Not Available]	R0	0	361	0	361	0	361	0	361
TCGA-DD-AADC	LIHC	53	MALE	ASIAN	Stage I	[Not Applicable]	Hepatocellular Carcinoma	G3	2011	[Not Available]	-19527	Dead	WITH TUMOR		425	[Not Available]	Intrahepatic Recurrence	Liver		101	[Not Available]	R0	1	425	1	425	1	101	1	101
TCGA-DD-AACC	LIHC	61	MALE	ASIAN	Stage I	[Not Applicable]	Hepatocellular Carcinoma	G2	2008	[Not Available]	-22499	Dead	WITH TUMOR		1685	[Not Available]	Locoregional Recurrence	Liver		537	[Not Available]	R0	1	1685	1	1685	1	537	1	537
TCGA-G3-A25T	LIHC	45	FEMALE	WHITE	Stage IIIA	[Not Applicable]	Hepatocellular Carcinoma	G2	2007	[Not Available]	-16461	Alive	WITH TUMOR	1553		[Not Available]	Intrahepatic Recurrence	Liver		452	[Not Available]	R0	0	1553	0	1553	1	452	1	452
TCGA-G3-A3CH	LIHC	53	MALE	ASIAN	Stage IIIA	[Not Applicable]	Hepatocellular Carcinoma	G2	2010	[Not Available]	-19473	Alive	WITH TUMOR	780		[Not Available]	Intrahepatic Recurrence	Liver		116	[Not Available]	R0	0	780	0	780	1	116	1	116
TCGA-HP-A5N0	LIHC	90	FEMALE	[Not Evaluated]	[Not Available]	[Not Applicable]	Hepatocellular Carcinoma	[Not Available]		[Not Available]	-32120	Dead	WITH TUMOR		1147	[Not Available]	Locoregional Recurrence	Liver		179	[Not Available]	R0	1	1147	1	1147	1	179	1	179
TCGA-DD-A3A7	LIHC	67	MALE	[Unknown]	Stage IIIB	[Not Applicable]	Hepatocellular Carcinoma	G3	1998	[Not Available]	-24599	Dead	WITH TUMOR		419	[Not Available]	Intrahepatic Recurrence	Liver		144	[Not Available]	R0	1	419	1	419	1	144	1	144
TCGA-BC-4073	LIHC	73	MALE	WHITE	Stage IIIA	[Not Applicable]	Hepatocellular Carcinoma	G3	2009	[Not Available]	-26795	Alive	WITH TUMOR	849		[Not Available]					[Not Available]	R1	0	849	0	849			0	849
TCGA-2Y-A9HA	LIHC	70	MALE	WHITE	Stage II	[Not Applicable]	Hepatocellular Carcinoma	G2	2012	[Not Available]	-25892	Dead	WITH TUMOR		36	[Not Available]					[Not Available]	R0	1	36	1	36			1	36
TCGA-WX-AA44	LIHC	64	FEMALE	WHITE	Stage I	[Not Applicable]	Hepatocellular Carcinoma	G3	2011	[Not Available]	-23654	Alive	WITH TUMOR	615		[Not Available]	Intrahepatic Recurrence	Liver		246	[Not Available]	RX	0	615	0	615			1	246
TCGA-DD-A39Z	LIHC	43	FEMALE	[Not Available]	Stage II	[Not Applicable]	Hepatocellular Carcinoma	G2	1996	[Not Available]	-15930	Dead	TUMOR FREE		601	[Not Available]					[Not Available]	R0	1	601	0	601	0	601	0	601
TCGA-DD-AAD5	LIHC	54	MALE	ASIAN	Stage I	[Not Applicable]	Hepatocellular Carcinoma	G3	2011	[Not Available]	-19748	Alive	WITH TUMOR	1345		[Not Available]	Intrahepatic Recurrence	Liver		130	[Not Available]	R0	0	1345	0	1345	1	130	1	130
TCGA-2Y-A9H7	LIHC	81	FEMALE	WHITE	Stage I	[Not Applicable]	Hepatocellular Carcinoma	G2	2011	[Not Available]	-29752	Alive	WITH TUMOR	1168		[Not Available]	Locoregional Recurrence	Liver		1117	[Not Available]	R0	0	1168	0	1168	1	1117	1	1117
TCGA-DD-A1EJ	LIHC	71	FEMALE	WHITE	Stage IIIC	[Not Applicable]	Hepatocellular Carcinoma	G2	2008	[Not Available]	-26009	Dead	WITH TUMOR		1005	[Not Available]	Intrahepatic Recurrence	Liver		263	[Not Available]	R0	1	1005	1	1005	1	263	1	263
TCGA-DD-A4NG	LIHC	77	MALE	WHITE	Stage IIIA	[Not Applicable]	Hepatocellular Carcinoma	G2	2011	[Not Available]	-28234	Dead	WITH TUMOR		802	[Not Available]	Locoregional Recurrence	Liver		430	[Not Available]	R0	1	802	1	802	1	430	1	430
TCGA-CC-A9FS	LIHC	55	MALE	ASIAN	Stage II	[Not Applicable]	Hepatocellular Carcinoma	G2	2013	[Not Available]	-20157	Alive	WITH TUMOR	211		[Not Available]	New Primary Tumor	Lung		109	[Not Available]	R0	0	211	0	211	0	211	1	109
TCGA-DD-A4NO	LIHC	65	MALE	WHITE	Stage I	[Not Applicable]	Hepatocellular Carcinoma	G1	2007	[Not Available]	-24090	Alive	WITH TUMOR	2245		[Not Available]	Locoregional Recurrence	Liver		990	[Not Available]	R0	0	2245	0	2245	1	990	1	990
TCGA-DD-AAVY	LIHC	56	MALE	ASIAN	Stage IIIA	[Not Applicable]	Hepatocellular Carcinoma	G2	2009	[Not Available]	-20709	Alive	TUMOR FREE	1970		[Not Available]					[Not Available]	R0	0	1970	0	1970	0	1970	0	1970
TCGA-G3-A25Y	LIHC	52	FEMALE	ASIAN	Stage I	[Not Applicable]	Hepatocellular Carcinoma	G3	2006	[Not Available]	-19055	Dead	WITH TUMOR		452	[Not Available]	Locoregional Recurrence	Liver		355	[Not Available]	R0	1	452	1	452	1	355	1	355
TCGA-BC-A3KF	LIHC	66	FEMALE	WHITE	Stage I	[Not Applicable]	Hepatocellular Carcinoma	G2	2011	[Not Available]	-24328	Alive	TUMOR FREE	8		[Not Available]					[Not Available]	R0	0	8	0	8	0	8	0	8
TCGA-DD-A119	LIHC	40	MALE	ASIAN	Stage IV	[Not Applicable]	Hepatocellular Carcinoma	G3	2003	[Not Available]	-14613	Dead			223	[Not Available]					[Not Available]	R2	1	223		223			0	223
TCGA-DD-AAVR	LIHC	44	MALE	ASIAN	Stage I	[Not Applicable]	Hepatocellular Carcinoma	G2	2007	[Not Available]	-16157	Alive	TUMOR FREE	2513		[Not Available]					[Not Available]	R0	0	2513	0	2513	0	2513	0	2513
TCGA-UB-A7MA	LIHC	62	FEMALE	WHITE	Stage II	[Not Applicable]	Hepatocholangiocarcinoma (Mixed)	G2	2013	[Not Available]	-22843	Alive	WITH TUMOR	848		[Not Available]	Intrahepatic Recurrence	Liver		221	[Not Available]	R1	0	848	0	848			1	221
TCGA-ZS-A9CG	LIHC	55	MALE	WHITE	Stage II	[Not Applicable]	Hepatocellular Carcinoma	G2	2013	[Not Available]	-20100	Alive	TUMOR FREE	341		[Not Available]					[Not Available]	R0	0	341	0	341	0	341	0	341
TCGA-ES-A2HT	LIHC	54	MALE	BLACK OR AFRICAN AMERICAN	Stage I	[Not Applicable]	Hepatocellular Carcinoma	G2	2007	[Not Available]	-20023	Dead	TUMOR FREE		438	[Not Available]					[Not Available]	R0	1	438	0	438	0	438	0	438
TCGA-G3-A7M9	LIHC	70	MALE	WHITE	Stage IIIB	[Not Applicable]	Hepatocellular Carcinoma	G2	2013	[Not Available]	-25588	Dead			56	[Not Available]					[Not Available]	R0	1	56		56	0	56	0	56
TCGA-DD-AADI	LIHC	43	FEMALE	ASIAN	Stage I	[Not Applicable]	Hepatocellular Carcinoma	G3	2011	[Not Available]	-15928	Alive	TUMOR FREE	1085		[Not Available]					[Not Available]	R0	0	1085	0	1085	0	1085	0	1085
TCGA-CC-A7IK	LIHC	59	MALE	ASIAN	Stage IIIA	[Not Applicable]	Hepatocellular Carcinoma	G3	2013	[Not Available]	-21552	Dead	WITH TUMOR		262	[Not Available]	Locoregional Recurrence			150	[Not Available]	R0	1	262	1	262	1	150	1	150
TCGA-DD-AADW	LIHC	48	MALE	ASIAN	Stage I	[Not Applicable]	Hepatocellular Carcinoma	G3	2013	[Not Available]	-17781	Alive	TUMOR FREE	587		[Not Available]	Locoregional Recurrence	Liver		386	[Not Available]	R0	0	587	0	587	1	386	1	386
TCGA-FV-A4ZQ	LIHC	52	MALE	WHITE	Stage I	[Not Applicable]	Hepatocellular Carcinoma	G2	2012	[Not Available]	-19090	Alive	TUMOR FREE	12		[Not Available]					[Not Available]	R0	0	12	0	12	0	12	0	12
TCGA-DD-AADM	LIHC	58	MALE	ASIAN	Stage II	[Not Applicable]	Hepatocellular Carcinoma	G3	2012	[Not Available]	-21349	Dead	TUMOR FREE		12	[Not Available]					[Not Available]	R0	1	12	0	12	0	12	0	12
TCGA-DD-AAW0	LIHC	54	MALE	ASIAN	Stage I	[Not Applicable]	Hepatocellular Carcinoma	G2	2009	[Not Available]	-19981	Alive	TUMOR FREE	2015		[Not Available]					[Not Available]	R0	0	2015	0	2015	0	2015	0	2015
TCGA-K7-AAU7	LIHC	61	MALE	WHITE	Stage II	[Not Applicable]	Hepatocholangiocarcinoma (Mixed)	G2	2013	[Not Available]	-22476	Alive	WITH TUMOR	359		[Not Available]	Intrahepatic Recurrence	Liver		58	[Not Available]	RX	0	359	0	359			1	58
TCGA-ED-A8O5	LIHC	59	FEMALE	ASIAN	Stage IIIA	[Not Applicable]	Hepatocellular Carcinoma	G3	2013	[Not Available]	-21648	Alive	TUMOR FREE	406		[Not Available]					[Not Available]	R0	0	406	0	406	0	406	0	406
TCGA-DD-A73G	LIHC	73	FEMALE	WHITE	Stage I	[Not Applicable]	Hepatocellular Carcinoma	G3	2005	[Not Available]	-26949	Alive	TUMOR FREE	3478		[Not Available]					[Not Available]	R0	0	3478	0	3478	0	3478	0	3478
TCGA-DD-A11B	LIHC	73	MALE	WHITE	Stage I	[Not Applicable]	Hepatocellular Carcinoma	G2	2005	[Not Available]	-26857	Dead	TUMOR FREE		14	[Not Available]					[Not Available]	RX	1	14	0	14			0	14
TCGA-WX-AA46	LIHC	61	MALE	WHITE	Stage II	[Not Applicable]	Hepatocellular Carcinoma	G1	2012	[Not Available]	-22639	Alive	TUMOR FREE	756		[Not Available]					[Not Available]	R0	0	756	0	756	0	756	0	756
TCGA-ED-A66X	LIHC	35	MALE	ASIAN	Stage IIIA	[Not Applicable]	Hepatocellular Carcinoma	G3	2013	[Not Available]	-12947	Alive	TUMOR FREE	406		[Not Available]	Intrahepatic Recurrence	Liver		124	[Not Available]	R0	0	406	0	406	1	124	1	124
TCGA-BC-A10X	LIHC	52	FEMALE	WHITE	Stage IIIA	[Not Applicable]	Hepatocellular Carcinoma	G2	2002	[Not Available]	-19140	Dead	TUMOR FREE		770	[Not Available]					[Not Available]	R0	1	770	0	770	0	770	0	770
TCGA-DD-AADS	LIHC	63	MALE	ASIAN	Stage I	[Not Applicable]	Hepatocellular Carcinoma	G2	2013	[Not Available]	-23227	Alive	TUMOR FREE	474		[Not Available]					[Not Available]	R0	0	474	0	474	0	474	0	474
TCGA-MR-A520	LIHC	58	MALE	WHITE	Stage I	[Not Applicable]	Hepatocellular Carcinoma	G1	2012	[Not Available]	-21398	Alive	TUMOR FREE	229		[Not Available]					[Not Available]	[Not Available]	0	229	0	229			0	229
TCGA-LG-A9QD	LIHC	68	MALE	WHITE	Stage IIIA	[Not Applicable]	Hepatocellular Carcinoma	G2	2013	[Not Available]	-24969	Alive	WITH TUMOR	366		[Not Available]					[Not Available]	R0	0	366	0	366	0	366	0	366
TCGA-FV-A496	LIHC	84	FEMALE	WHITE	Stage I	[Not Applicable]	Hepatocellular Carcinoma	G2	2012	[Not Available]	-30950	Alive	TUMOR FREE	10		[Not Available]					[Not Available]	R0	0	10	0	10	0	10	0	10
TCGA-5C-A9VG	LIHC	58	MALE	WHITE	Stage II	[Not Applicable]	Hepatocellular Carcinoma	G2	2013	[Not Available]	-21273	Alive	TUMOR FREE	328		[Not Available]					[Not Available]	R0	0	328	0	328	0	328	0	328
TCGA-BC-A10R	LIHC	66	FEMALE	WHITE	[Not Available]	[Not Applicable]	Hepatocellular Carcinoma	G2	1999	[Not Available]	-24274	Dead	WITH TUMOR		308	[Not Available]	Intrahepatic Recurrence			199	[Not Available]	R0	1	308	1	308	1	199	1	199
TCGA-DD-AA3A	LIHC	81	FEMALE	WHITE	Stage I	[Not Applicable]	Hepatocholangiocarcinoma (Mixed)	G4	2009	[Not Available]	-29712	Dead	TUMOR FREE		410	[Not Available]					[Not Available]	R0	1	410	0	410	0	410	0	410
TCGA-DD-A73A	LIHC	71	MALE	WHITE	Stage I	[Not Applicable]	Hepatocellular Carcinoma	G2	2012	[Not Available]	-26136	Alive	TUMOR FREE	728		[Not Available]					[Not Available]	R0	0	728	0	728	0	728	0	728
TCGA-BW-A5NQ	LIHC	63	MALE	WHITE	Stage I	[Not Applicable]	Hepatocellular Carcinoma	G3	2010	[Not Available]	-23353	Alive	TUMOR FREE	0		[Not Available]					[Not Available]	RX	0	0	0	0			0	0
TCGA-DD-A4NB	LIHC	25	MALE	WHITE	Stage I	[Not Applicable]	Fibrolamellar Carcinoma	G2	2011	[Not Available]	-9426	Alive	TUMOR FREE	989		[Not Available]	Extrahepatic Recurrence	Other, specify	retroperitoneal lymph nodes	912	[Not Available]	R0	0	989	0	989	1	912	1	912
TCGA-DD-AADO	LIHC	55	MALE	ASIAN	Stage I	[Not Applicable]	Hepatocellular Carcinoma	G3	2013	[Not Available]	-20139	Alive	TUMOR FREE	453		[Not Available]					[Not Available]	R0	0	453	0	453	0	453	0	453
TCGA-FV-A3R3	LIHC	38	FEMALE	WHITE	Stage I	[Not Applicable]	Hepatocellular Carcinoma	G2	2012	[Not Available]	-14231	Dead	TUMOR FREE		366	[Not Available]					[Not Available]	R0	1	366	0	366	0	366	0	366
TCGA-RC-A7SB	LIHC	53	MALE	ASIAN	Stage II	[Not Applicable]	Hepatocellular Carcinoma	G2	2012	[Not Available]	-19698	Alive	TUMOR FREE	588		[Not Available]					[Not Available]	R0	0	588	0	588	0	588	0	588
TCGA-DD-AAD2	LIHC	66	MALE	ASIAN	Stage I	[Not Applicable]	Hepatocellular Carcinoma	G2	2010	[Not Available]	-24221	Alive	TUMOR FREE	658		[Not Available]					[Not Available]	R0	0	658	0	658	0	658	0	658
TCGA-DD-A1EG	LIHC	76	MALE	WHITE	Stage I	[Not Applicable]	Hepatocellular Carcinoma	G3	2007	[Not Available]	-28108	Dead	WITH TUMOR		1372	[Not Available]	Intrahepatic Recurrence	Liver		875	[Not Available]	R0	1	1372	1	1372	1	875	1	875
TCGA-G3-A3CI	LIHC	71	MALE	WHITE	Stage I	[Not Applicable]	Hepatocellular Carcinoma	G2	2011	[Not Available]	-26224	Alive	TUMOR FREE	180		[Not Available]					[Not Available]	R0	0	180	0	180	0	180	0	180
TCGA-DD-AAD1	LIHC	51	FEMALE	ASIAN	Stage I	[Not Applicable]	Hepatocellular Carcinoma	G4	2010	[Not Available]	-18794	Alive	WITH TUMOR	564		[Not Available]	Intrahepatic Recurrence	Liver		127	[Not Available]	R1	0	564	0	564			1	127
TCGA-DD-A11C	LIHC	69	MALE	WHITE	Stage I	[Not Applicable]	Hepatocellular Carcinoma	G3	2006	[Not Available]	-25403	Alive	TUMOR FREE	662		[Not Available]					[Not Available]	RX	0	662	0	662			0	662
TCGA-WX-AA47	LIHC	33	FEMALE	WHITE	Stage IIIA	[Not Applicable]	Hepatocellular Carcinoma	G2	2012	[Not Available]	-12056	Dead	WITH TUMOR		556	[Not Available]	Intrahepatic Recurrence	Liver		103	[Not Available]	R0	1	556	1	556	1	103	1	103
TCGA-NI-A4U2	LIHC	71	MALE	WHITE	Stage IIIA	[Not Applicable]	Hepatocellular Carcinoma	G1	2005	[Not Available]	-26011	Dead	WITH TUMOR		1791	[Not Available]	Locoregional Recurrence	Liver		106	[Not Available]	R0	1	1791	1	1791	1	106	1	106
TCGA-2Y-A9H3	LIHC	45	MALE	WHITE	Stage II	[Not Applicable]	Hepatocellular Carcinoma	G1	2010	[Not Available]	-16443	Alive	TUMOR FREE	1516		[Not Available]	Locoregional Recurrence	Liver		22	[Not Available]	R0	0	1516	0	1516	1	22	1	22
TCGA-BC-A216	LIHC	62	FEMALE	WHITE	Stage IIIA	[Not Applicable]	Hepatocellular Carcinoma	G2	2008	[Not Available]	-22968	Alive	TUMOR FREE	1351		[Not Available]					[Not Available]	R0	0	1351	0	1351	0	1351	0	1351
TCGA-2Y-A9H5	LIHC	59	FEMALE	WHITE	Stage I	[Not Applicable]	Hepatocellular Carcinoma	G3	2010	[Not Available]	-21818	Dead	WITH TUMOR		555	[Not Available]	Locoregional Recurrence	Liver		258	[Not Available]	R0	1	555	1	555	1	258	1	258
TCGA-EP-A12J	LIHC	62	MALE	BLACK OR AFRICAN AMERICAN	Stage I	[Not Applicable]	Hepatocellular Carcinoma	G1	2010	[Not Available]	-22997	Alive	TUMOR FREE	570		[Not Available]					[Not Available]	R0	0	570	0	570	0	570	0	570
TCGA-DD-AACP	LIHC	64	MALE	ASIAN	Stage I	[Not Applicable]	Hepatocellular Carcinoma	G3	2009	[Not Available]	-23728	Alive		415		[Not Available]					[Not Available]	R0	0	415	0	415	0	415	0	415
TCGA-DD-A3A2	LIHC	76	FEMALE	WHITE	Stage I	[Not Applicable]	Hepatocellular Carcinoma	G1	1998	[Not Available]	-27930	Dead	TUMOR FREE		2131	[Not Available]					[Not Available]	R0	1	2131	0	2131	0	2131	0	2131
TCGA-DD-A3A0	LIHC	70	MALE	WHITE	Stage I	[Not Applicable]	Hepatocellular Carcinoma	G2	2001	[Not Available]	-25889	Dead	WITH TUMOR		785	[Not Available]	New Primary Tumor			359	[Not Available]	R0	1	785	1	785	0	785	1	359
TCGA-DD-A4ND	LIHC	56	FEMALE	WHITE	Stage I	[Not Applicable]	Hepatocellular Carcinoma	G3	2007	[Not Available]	-20782	Alive	TUMOR FREE	2746		[Not Available]	New Primary Tumor	Other, specify	breast cancer	15	[Not Available]	R0	0	2746	0	2746	0	2746	1	15
TCGA-G3-AAV5	LIHC	67	MALE	WHITE	Stage II	[Not Applicable]	Hepatocellular Carcinoma	G2	2013	[Not Available]	-24655	Alive	WITH TUMOR	354		[Not Available]	Locoregional Recurrence	Liver		117	[Not Available]	R0	0	354	0	354	1	117	1	117
TCGA-DD-AAEB	LIHC	60	MALE	ASIAN	Stage I	[Not Applicable]	Hepatocellular Carcinoma	G2	2012	[Not Available]	-22121	Alive	TUMOR FREE	478		[Not Available]					[Not Available]	R0	0	478	0	478	0	478	0	478
TCGA-2Y-A9H8	LIHC	85	FEMALE	WHITE	[Discrepancy]	[Not Applicable]	Hepatocellular Carcinoma	G2	2011	[Not Available]	-31322	Dead	WITH TUMOR		633	[Not Available]	Extrahepatic Recurrence	Other, specify	Kidney	398	[Not Available]	R0	1	633	1	633	1	398	1	398
TCGA-G3-A25S	LIHC	64	MALE	WHITE	Stage I	[Not Applicable]	Hepatocellular Carcinoma	G2	2009	[Not Available]	-23571	Dead	WITH TUMOR		416	[Not Available]	Extrahepatic Recurrence	Other, specify	Bone and Lung	37	[Not Available]	R1	1	416	1	416			1	37
TCGA-RC-A6M5	LIHC	20	FEMALE	WHITE	Stage IVA	[Not Applicable]	Fibrolamellar Carcinoma	G2	2012	[Not Available]	-7634	Alive		15		[Not Available]					[Not Available]	R0	0	15	0	15			0	15
TCGA-DD-AAE4	LIHC	49	FEMALE	ASIAN	Stage I	[Not Applicable]	Hepatocellular Carcinoma	G1	2013	[Not Available]	-18009	Alive	WITH TUMOR	608		[Not Available]	Locoregional Recurrence	Liver		111	[Not Available]	R0	0	608	0	608	1	111	1	111
TCGA-DD-AACH	LIHC	69	MALE	ASIAN	Stage II	[Not Applicable]	Hepatocellular Carcinoma	G3	2008	[Not Available]	-25544	Dead	TUMOR FREE		195	[Not Available]	Intrahepatic Recurrence	Liver		83	[Not Available]	R0	1	195	0	195	1	83	1	83
TCGA-DD-AAD8	LIHC	73	FEMALE	ASIAN	Stage I	[Not Applicable]	Hepatocellular Carcinoma	G2	2011	[Not Available]	-26781	Alive	TUMOR FREE	1219		[Not Available]					[Not Available]	R0	0	1219	0	1219	0	1219	0	1219
TCGA-CC-A7IH	LIHC	58	MALE	ASIAN	Stage IIIA	[Not Applicable]	Hepatocellular Carcinoma	G1	2013	[Not Available]	-21381	Alive	TUMOR FREE	365		[Not Available]					[Not Available]	R0	0	365	0	365	0	365	0	365
TCGA-DD-AAE9	LIHC	69	MALE	ASIAN	Stage I	[Not Applicable]	Hepatocellular Carcinoma	G3	2012	[Not Available]	-25451	Alive	TUMOR FREE	722		[Not Available]					[Not Available]	R0	0	722	0	722	0	722	0	722
TCGA-DD-AADA	LIHC	66	FEMALE	ASIAN	Stage I	[Not Applicable]	Hepatocellular Carcinoma	G3	2011	[Not Available]	-24288	Alive	TUMOR FREE	1233		[Not Available]					[Not Available]	R0	0	1233	0	1233	0	1233	0	1233
TCGA-DD-A39X	LIHC	78	FEMALE	WHITE	Stage I	[Not Applicable]	Hepatocellular Carcinoma	G2	1998	[Not Available]	-28528	Dead	WITH TUMOR		1694	[Not Available]	Intrahepatic Recurrence	Liver		1032	[Not Available]	R0	1	1694	1	1694	1	1032	1	1032
TCGA-DD-AADE	LIHC	50	MALE	ASIAN	Stage I	[Not Applicable]	Hepatocellular Carcinoma	G4	2011	[Not Available]	-18482	Alive	WITH TUMOR	1202		[Not Available]	Intrahepatic Recurrence	Liver		168	[Not Available]	R0	0	1202	0	1202	1	168	1	168
TCGA-K7-A5RG	LIHC	66	MALE	BLACK OR AFRICAN AMERICAN	Stage I	[Not Applicable]	Hepatocellular Carcinoma	G1	2012	[Not Available]	-24218	Alive	TUMOR FREE	519		[Not Available]					[Not Available]	R0	0	519	0	519	0	519	0	519
TCGA-DD-AAVW	LIHC	35	MALE	ASIAN	Stage I	[Not Applicable]	Hepatocellular Carcinoma	G2	2008	[Not Available]	-12986	Alive	TUMOR FREE	2317		[Not Available]					[Not Available]	R0	0	2317	0	2317	0	2317	0	2317
TCGA-G3-A5SI	LIHC	44	MALE	ASIAN	Stage II	[Not Applicable]	Hepatocellular Carcinoma	G2	2011	[Not Available]	-16126	Dead	WITH TUMOR		768	[Not Available]	Intrahepatic Recurrence	Liver		348	[Not Available]	R0	1	768	1	768	1	348	1	348
TCGA-MR-A8JO	LIHC	34	MALE	WHITE	Stage I	[Not Applicable]	Fibrolamellar Carcinoma	G3	2013	[Not Available]	-12669	Alive	TUMOR FREE	330		[Not Available]					[Not Available]	RX	0	330	0	330			0	330
TCGA-DD-AAE1	LIHC	52	MALE	ASIAN	Stage I	[Not Applicable]	Hepatocellular Carcinoma	G3	2013	[Not Available]	-19073	Alive	TUMOR FREE	552		[Not Available]					[Not Available]	R0	0	552	0	552	0	552	0	552
TCGA-DD-A4NN	LIHC	56	FEMALE	WHITE	Stage I	[Not Applicable]	Hepatocellular Carcinoma	G3	2004	[Not Available]	-20548	Dead	WITH TUMOR		899	[Not Available]	Extrahepatic Recurrence	Lung		166	[Not Available]	R0	1	899	1	899	1	166	1	166
TCGA-BW-A5NP	LIHC	26	FEMALE	WHITE	Stage IV	[Not Applicable]	Hepatocellular Carcinoma	G3	2010	[Not Available]	-9809	Alive	WITH TUMOR	0		[Not Available]	Extrahepatic Recurrence	Liver		102	[Not Available]	RX	0	0	0	0			1	102
TCGA-CC-A8HV	LIHC	51	FEMALE	ASIAN	Stage II	[Not Applicable]	Hepatocellular Carcinoma	G2	2013	[Not Available]	-18935	Dead	WITH TUMOR		279	[Not Available]	Locoregional Recurrence			149	[Not Available]	R0	1	279	1	279	1	149	1	149
TCGA-G3-A3CK	LIHC	61	MALE	ASIAN	Stage I	[Not Applicable]	Hepatocellular Carcinoma	G2	2011	[Not Available]	-22462	Alive	TUMOR FREE	585		[Not Available]					[Not Available]	R0	0	585	0	585	0	585	0	585
TCGA-EP-A26S	LIHC	70	MALE	WHITE	Stage I	[Not Applicable]	Hepatocellular Carcinoma	G2	2011	[Not Available]	-25677	Alive	TUMOR FREE	608		[Not Available]					[Not Available]	[Not Available]	0	608	0	608			0	608
TCGA-2Y-A9GX	LIHC	68	MALE	WHITE	Stage I	[Not Applicable]	Hepatocellular Carcinoma	G2	2007	[Not Available]	-24963	Alive	WITH TUMOR	2442		[Not Available]	Locoregional Recurrence	Liver		2133	[Not Available]	R1	0	2442	0	2442			1	2133
TCGA-RC-A7S9	LIHC	47	FEMALE	ASIAN	Stage I	[Not Applicable]	Hepatocellular Carcinoma	G3	2012	[Not Available]	-17403	Alive	TUMOR FREE	640		[Not Available]					[Not Available]	R0	0	640	0	640	0	640	0	640
TCGA-YA-A8S7	LIHC	68	MALE	WHITE	Stage IIIA	[Not Applicable]	Hepatocellular Carcinoma	G3	2012	[Not Available]	-25188	Dead	WITH TUMOR		412	[Not Available]	Extrahepatic Recurrence	Brain		398	[Not Available]	R0	1	412	1	412	1	398	1	398
TCGA-DD-A3A3	LIHC	45	MALE	ASIAN	Stage I	[Not Applicable]	Hepatocellular Carcinoma	G2	1999	[Not Available]	-16708	Dead			535	[Not Available]					[Not Available]	R0	1	535		535	0	535	0	535
TCGA-O8-A75V	LIHC	54	MALE	[Unknown]	Stage I	[Not Applicable]	Hepatocellular Carcinoma	G2	2013	[Not Available]	-19850	Alive	TUMOR FREE	538		[Not Available]					[Not Available]	R1	0	538	0	538			0	538
TCGA-ZP-A9D0	LIHC	67	FEMALE	BLACK OR AFRICAN AMERICAN	[Not Available]	[Not Applicable]	Hepatocellular Carcinoma	G1	2011	[Not Available]	-24525	Alive	TUMOR FREE	1091		[Not Available]					[Not Available]	R0	0	1091	0	1091	0	1091	0	1091
TCGA-DD-A1EE	LIHC	73	MALE	WHITE	Stage IIIA	[Not Applicable]	Hepatocellular Carcinoma	G3	2006	[Not Available]	-26858	Dead	WITH TUMOR		349	[Not Available]	Intrahepatic Recurrence	Liver		44	[Not Available]	R0	1	349	1	349	1	44	1	44
TCGA-DD-A3A6	LIHC	72	FEMALE	WHITE	Stage II	[Not Applicable]	Hepatocellular Carcinoma	G2	1997	[Not Available]	-26319	Dead	TUMOR FREE		3258	[Not Available]					[Not Available]	R0	1	3258	0	3258	0	3258	0	3258
TCGA-RC-A6M4	LIHC	74	FEMALE	WHITE	Stage IIIA	[Not Applicable]	Hepatocellular Carcinoma	G2	2010	[Not Available]	-27327	Alive		22		[Not Available]					[Not Available]	R1	0	22	0	22			0	22
TCGA-DD-AAD6	LIHC	66	MALE	ASIAN	Stage IIIA	[Not Applicable]	Hepatocellular Carcinoma	G3	2011	[Not Available]	-24185	Alive	TUMOR FREE	672		[Not Available]	Locoregional Recurrence	Liver		50	[Not Available]	R0	0	672	0	672	1	50	1	50
TCGA-K7-A5RF	LIHC	64	MALE	WHITE	Stage I	[Not Applicable]	Hepatocellular Carcinoma	G1	2012	[Not Available]	-23557	Alive	TUMOR FREE	631		[Not Available]	Intrahepatic Recurrence	Liver		205	[Not Available]	R0	0	631	0	631	1	205	1	205
TCGA-CC-A8HS	LIHC	18	MALE	ASIAN	Stage IIIC	[Not Applicable]	Hepatocellular Carcinoma	G1	2013	[Not Available]	-6617	Dead	WITH TUMOR		300	[Not Available]	Locoregional Recurrence			201	[Not Available]	R0	1	300	1	300	1	201	1	201
TCGA-G3-A5SK	LIHC	58	MALE	WHITE	Stage I	[Not Applicable]	Hepatocellular Carcinoma	G1	2012	[Not Available]	-21320	Alive	WITH TUMOR	744		[Not Available]	Intrahepatic Recurrence	Liver		483	[Not Available]	R0	0	744	0	744	1	483	1	483
TCGA-DD-A4NQ	LIHC	60	MALE	WHITE	Stage II	[Not Applicable]	Hepatocellular Carcinoma	G3	2007	[Not Available]	-22111	Dead	WITH TUMOR		373	[Not Available]	Intrahepatic Recurrence	Liver		126	[Not Available]	R0	1	373	1	373	1	126	1	126
TCGA-DD-A1ED	LIHC	68	MALE	WHITE	Stage I	[Not Applicable]	Hepatocellular Carcinoma	G1	2006	[Not Available]	-25039	Alive	TUMOR FREE	2301		[Not Available]					[Not Available]	R0	0	2301	0	2301	0	2301	0	2301
TCGA-G3-AAV3	LIHC	58	FEMALE	WHITE	Stage II	[Not Applicable]	Hepatocellular Carcinoma	G2	2013	[Not Available]	-21449	Alive	TUMOR FREE	412		[Not Available]					[Not Available]	R0	0	412	0	412	0	412	0	412
TCGA-ZP-A9CV	LIHC	59	MALE	WHITE	[Not Available]	[Not Applicable]	Hepatocellular Carcinoma	G1	2011	[Not Available]	-21633	Dead	WITH TUMOR		1088	[Not Available]					[Not Available]	R0	1	1088	1	1088			1	1088
TCGA-DD-AACV	LIHC	53	MALE	ASIAN	Stage I	[Not Applicable]	Hepatocellular Carcinoma	G3	2010	[Not Available]	-19660	Alive	WITH TUMOR	1531		[Not Available]	Intrahepatic Recurrence	Liver		344	[Not Available]	R0	0	1531	0	1531	1	344	1	344
TCGA-DD-AACG	LIHC	52	MALE	ASIAN	Stage II	[Not Applicable]	Hepatocellular Carcinoma	G4	2008	[Not Available]	-19174	Dead	WITH TUMOR		469	[Not Available]	Intrahepatic Recurrence	Liver		125	[Not Available]	R0	1	469	1	469	1	125	1	125
TCGA-CC-A3MA	LIHC	61	MALE	ASIAN	Stage IIIA	[Not Applicable]	Hepatocellular Carcinoma	G2	2011	[Not Available]	-22375	Dead	WITH TUMOR		303	[Not Available]	Locoregional Recurrence			261	[Not Available]	R0	1	303	1	303	1	261	1	261
TCGA-2V-A95S	LIHC		MALE	ASIAN	Stage II	[Not Applicable]	Hepatocellular Carcinoma	G3		[Not Available]		Alive	WITH TUMOR			[Not Available]					[Not Available]	R0	0		0		0		0
TCGA-2Y-A9H1	LIHC	58	MALE	WHITE	Stage I	[Not Applicable]	Hepatocellular Carcinoma	G2	2010	[Not Available]	-21222	Dead	WITH TUMOR		1229	[Not Available]	Locoregional Recurrence	Liver		321	[Not Available]	R0	1	1229	1	1229	1	321	1	321
TCGA-DD-A4NF	LIHC	72	MALE	WHITE	Stage I	[Not Applicable]	Hepatocellular Carcinoma	G2	2011	[Not Available]	-26330	Alive	WITH TUMOR	942		[Not Available]	Extrahepatic Recurrence	Bone		656	[Not Available]	R0	0	942	0	942	1	656	1	656
TCGA-DD-A3A1	LIHC	65	MALE	[Not Available]	Stage IIIA	[Not Applicable]	Hepatocellular Carcinoma	G2	2001	[Not Available]	-24046	Dead	TUMOR FREE		233	[Not Available]					[Not Available]	R0	1	233	0	233	0	233	0	233
TCGA-KR-A7K2	LIHC	64	MALE	WHITE	Stage I	[Not Applicable]	Hepatocholangiocarcinoma (Mixed)	G1	2013	[Not Available]	-23699	Alive	TUMOR FREE	829		[Not Available]					[Not Available]	R0	0	829	0	829	0	829	0	829
TCGA-DD-AAC9	LIHC	51	MALE	ASIAN	Stage I	[Not Applicable]	Hepatocellular Carcinoma	G2	2008	[Not Available]	-18911	Alive	TUMOR FREE	347		[Not Available]					[Not Available]	R0	0	347	0	347	0	347	0	347
TCGA-DD-AACJ	LIHC	75	MALE	ASIAN	Stage II	[Not Applicable]	Hepatocellular Carcinoma	G2	2008	[Not Available]	-27528	Alive	WITH TUMOR	2102		[Not Available]	Locoregional Recurrence	Liver		100	[Not Available]	R0	0	2102	0	2102	1	100	1	100
TCGA-DD-AACN	LIHC	32	MALE	ASIAN	Stage I	[Not Applicable]	Hepatocellular Carcinoma	G3	2009	[Not Available]	-12007	Alive	WITH TUMOR	1302		[Not Available]	Intrahepatic Recurrence	Liver		357	[Not Available]	R0	0	1302	0	1302	1	357	1	357
TCGA-GJ-A6C0	LIHC	75	FEMALE	WHITE	Stage II	[Not Applicable]	Hepatocellular Carcinoma	G2	2012	[Not Available]	-27626	Dead			31	[Not Available]					[Not Available]	RX	1	31		31			0	31
TCGA-DD-AAE8	LIHC	45	MALE	ASIAN	Stage I	[Not Applicable]	Hepatocellular Carcinoma	G3	2012	[Not Available]	-16549	Alive	TUMOR FREE	664		[Not Available]	Locoregional Recurrence	Liver		28	[Not Available]	R0	0	664	0	664	1	28	1	28
TCGA-DD-AADV	LIHC	50	MALE	ASIAN	Stage I	[Not Applicable]	Hepatocellular Carcinoma	G3	2013	[Not Available]	-18300	Alive	TUMOR FREE	574		[Not Available]					[Not Available]	R0	0	574	0	574	0	574	0	574
TCGA-FV-A3I1	LIHC	81	FEMALE	WHITE	Stage II	[Not Applicable]	Hepatocellular Carcinoma	G2	2011	[Not Available]		Dead	TUMOR FREE		247	[Not Available]					[Not Available]	R0	1	247	0	247	0	247	0	247
TCGA-BC-A10Q	LIHC	72	FEMALE	WHITE	[Not Available]	[Not Applicable]	Hepatocellular Carcinoma	[Not Available]	1998	[Not Available]	-26400	Dead	WITH TUMOR		1135	[Not Available]	Intrahepatic Recurrence			340	[Not Available]	R1	1	1135	1	1135			1	340
TCGA-2Y-A9GS	LIHC	58	MALE	WHITE	[Discrepancy]	[Not Applicable]	Hepatocellular Carcinoma	G2	2006	[Not Available]	-21318	Dead	WITH TUMOR		724	[Not Available]	Extrahepatic Recurrence	Lung		102	[Not Available]	R0	1	724	1	724	1	102	1	102
TCGA-ED-A7PX	LIHC	48	FEMALE	ASIAN	Stage II	[Not Applicable]	Hepatocellular Carcinoma	G3	2013	[Not Available]	-17638	Alive	TUMOR FREE	6		[Not Available]					[Not Available]	R0	0	6	0	6	0	6	0	6
TCGA-DD-A3A8	LIHC	75	MALE	WHITE	Stage II	[Not Applicable]	Hepatocellular Carcinoma	G2	2001	[Not Available]	-27524	Dead	TUMOR FREE		11	[Not Available]					[Not Available]	R0	1	11	0	11	0	11	0	11
TCGA-G3-A7M6	LIHC	60	FEMALE	WHITE	Stage I	[Not Applicable]	Hepatocellular Carcinoma	G3	2013	[Not Available]	-22205	Alive	WITH TUMOR	632		[Not Available]	Locoregional Recurrence	Liver		293	[Not Available]	R0	0	632	0	632	1	293	1	293
TCGA-KR-A7K8	LIHC	57	MALE	[Unknown]	Stage I	[Not Applicable]	Hepatocellular Carcinoma	G1	2012	[Not Available]	-20914	Alive	TUMOR FREE	906		[Not Available]					[Not Available]	R0	0	906	0	906	0	906	0	906
TCGA-5R-AA1D	LIHC	17	FEMALE	WHITE	Stage IIIA	[Not Applicable]	Hepatocellular Carcinoma	G3	2013	[Not Available]	-6545	Alive	TUMOR FREE	449		[Not Available]					[Not Available]	R0	0	449	0	449	0	449	0	449
