# Supplementary material for: NamiRNA-mediated high expression of KNSTRN correlates with poor prognosis and tumor immune infiltration of hepatocellular carcinoma
Source: Research Square preprint supplement (doi:10.21203/rs.3.rs-3032233/v1), 2023-06-26
Supplement: Supplementary file 11 [file fe62f1e76ac044efc22edc56.xlsx]

## Sheet: Sheet1
Supplementary File.1 Detailed descriptions of KNSTRN-related genes.
Query	Statistic	P-value	FDR (BH)	Event_SD	Event_TD
A1BG	-0.181006	0.000548697	0.00236829	361	361
A2BP1	0.266344	2.80576e-07	3.3871e-06	361	57
A2LD1	-0.235552	6.07435e-06	4.91951e-05	361	361
A2M	-0.121786	0.0206386	0.049616	361	361
A4GALT	-0.198304	0.000149179	0.000781403	361	361
AAA1	0.262337	4.28285e-07	4.89627e-06	361	190
AAAS	0.267436	2.49723e-07	3.05106e-06	361	361
AACSL	0.255338	8.81844e-07	9.16115e-06	361	109
AACS	0.201738	0.000113623	0.000617409	361	361
AADACL3	0.142466	0.00670193	0.0193714	361	36
AADAC	-0.240245	3.90059e-06	3.33678e-05	361	360
AAGAB	0.256209	8.06922e-07	8.46227e-06	361	361
AARS2	0.174093	0.000894749	0.00360051	361	361
AASDH	-0.146719	0.00522011	0.01578	361	361
AATF	0.1755	0.000811138	0.00330614	361	361
ABAT	-0.188397	0.000318929	0.00149201	361	361
ABCA3	-0.199312	0.000137781	0.000729374	361	361
ABCA6	-0.173034	0.000962782	0.00383358	361	361
ABCA7	0.137875	0.00871412	0.0242275	361	361
ABCA8	-0.31338	1.14628e-09	2.57946e-08	361	358
ABCA9	-0.263781	3.68039e-07	4.28125e-06	361	360
ABCB4	-0.200855	0.000121919	0.000656397	361	361
ABCB7	-0.124063	0.0183666	0.0450401	361	361
ABCB8	-0.205402	8.45581e-05	0.000479355	361	361
ABCB9	0.173371	0.000940648	0.00375863	361	361
ABCC10	0.202005	0.00011123	0.000606721	361	361
ABCC12	0.190706	0.00026807	0.00128641	361	111
ABCC4	0.194997	0.000193045	0.000968872	361	361
ABCC5	0.31059	1.63412e-09	3.54118e-08	361	361
ABCC6	-0.198979	0.000141456	0.000746515	361	361
ABCG2	-0.247858	1.86469e-06	1.75249e-05	361	361
ABHD10	-0.185443	0.000397142	0.00179854	361	361
ABHD12	0.252883	1.13051e-06	1.13765e-05	361	361
ABHD14B	-0.338225	4.12573e-11	1.28181e-09	361	361
ABHD1	-0.172276	0.00101439	0.00399952	361	356
ABHD3	0.322681	3.42062e-10	8.65586e-09	361	361
ABHD6	-0.15466	0.00321812	0.0105583	361	361
ABHD8	0.226987	1.33211e-05	9.72824e-05	361	361
ABI1	0.122401	0.0200017	0.0483266	361	361
ABI2	0.252511	1.17358e-06	1.17329e-05	361	361
ABL1	0.166163	0.00153385	0.00568628	361	361
ABLIM1	-0.175323	0.000821253	0.0033407	361	361
ABLIM2	-0.16943	0.00123183	0.00470771	361	361
ABLIM3	-0.188262	0.000322183	0.00150546	361	361
ABT1	0.165247	0.00162997	0.00598576	361	361
ACAA1	-0.262403	4.25335e-07	4.86745e-06	361	361
ACAA2	-0.162838	0.00190961	0.00685717	361	361
ACACA	0.178167	0.000672172	0.00281402	361	361
ACAD10	-0.16267	0.00193066	0.00691408	361	361
ACAD11	-0.220045	2.46286e-05	0.000165814	361	361
ACAD8	-0.220523	2.36236e-05	0.000160459	361	361
ACADM	-0.197963	0.000153223	0.000798106	361	361
ACADS	-0.200619	0.00012423	0.000666858	361	361
ACADVL	-0.311305	1.49275e-09	3.25966e-08	361	361
ACAN	0.156158	0.00293001	0.0097708	361	340
ACAP2	0.139572	0.00791463	0.02231	361	361
ACAT1	-0.324816	2.57642e-10	6.7071e-09	361	361
ACAT2	0.131482	0.0124066	0.0324759	361	361
ACBD4	-0.271966	1.5318e-07	1.98864e-06	361	361
ACBD6	0.264014	3.59096e-07	4.20671e-06	361	361
ACBD7	0.469766	3.24403e-21	2.65863e-19	361	359
ACCN1	-0.137799	0.00875146	0.0243178	361	226
ACCN4	0.158854	0.00246998	0.00846113	361	164
ACCN5	0.177801	0.00068984	0.0028759	361	123
ACD	0.266153	2.86318e-07	3.44326e-06	361	361
ACE2	-0.249215	1.63064e-06	1.55976e-05	361	345
ACER1	-0.27553	1.03626e-07	1.42521e-06	361	105
ACER3	0.185901	0.00038396	0.00174699	361	361
ACIN1	0.307681	2.35619e-09	4.93412e-08	361	361
ACLY	0.176829	0.000738863	0.003049	361	361
ACOT11	0.305172	3.22026e-09	6.52406e-08	361	353
ACOT13	-0.212599	4.66093e-05	0.000288358	361	361
ACOT1	-0.234103	6.95205e-06	5.53578e-05	361	361
ACOT2	-0.226555	1.38483e-05	0.00010069	361	361
ACOT7	0.243973	2.72572e-06	2.43748e-05	361	361
ACOX1	-0.185436	0.000397368	0.00179854	361	361
ACOX2	-0.131599	0.0123286	0.0323229	361	361
ACOXL	0.194415	0.000201926	0.00100584	361	225
ACPL2	0.206559	7.6942e-05	0.000443374	361	361
ACPT	0.135153	0.0101463	0.0274133	361	182
ACRV1	0.390501	1.34247e-14	6.94421e-13	361	213
ACR	-0.191957	0.000243783	0.001185	361	339
ACSBG2	0.127689	0.0151978	0.0383653	361	166
ACSF2	-0.206929	7.46479e-05	0.000432029	361	361
ACSF3	-0.214774	3.8774e-05	0.000247099	361	361
ACSL4	0.126945	0.0158058	0.0396388	361	361
ACSL5	-0.266338	2.80737e-07	3.3871e-06	361	361
ACSL6	-0.220186	2.43281e-05	0.000164124	361	359
ACSM2A	-0.260864	4.9943e-07	5.60978e-06	361	361
ACSM2B	-0.237729	4.95169e-06	4.11058e-05	361	360
ACSM3	-0.153972	0.00335889	0.0109495	361	360
ACSM5	-0.221427	2.18269e-05	0.000150149	361	361
ACSS1	0.131107	0.0126614	0.0329964	361	361
ACTA1	0.225226	1.55968e-05	0.000111771	361	320
ACTA2	-0.201597	0.000114918	0.000623423	361	361
ACTL6A	0.463348	1.29895e-20	1.02653e-18	361	361
ACTN3	0.159514	0.00236781	0.00818094	361	214
ACTR2	0.124836	0.0176464	0.0435101	361	361
ACTR3C	-0.157634	0.0026693	0.00902685	361	361
ACTR3	0.19591	0.000179869	0.000912402	361	361
ACTR5	0.138923	0.00821225	0.0230251	361	361
ACTR6	0.20485	8.84381e-05	0.000497386	361	361
ACVR1B	0.159674	0.00234367	0.00810927	361	361
ACVR2B	0.20794	6.86948e-05	0.000402015	361	361
ACVRL1	-0.154088	0.00333466	0.0108826	361	361
ACY1	-0.253417	1.07119e-06	1.0856e-05	361	361
ACYP1	0.400088	2.61461e-15	1.43443e-13	361	361
ACYP2	-0.36297	1.10557e-12	4.36852e-11	361	361
ADAD1	0.156394	0.00288678	0.00965088	361	30
ADAM10	0.137335	0.00898297	0.024826	361	361
ADAM12	0.198922	0.000142093	0.00074941	361	359
ADAM15	0.149975	0.00429273	0.0134059	361	361
ADAM17	0.20743	7.16376e-05	0.000416333	361	361
ADAM19	0.141138	0.00723629	0.0206581	361	361
ADAM22	0.159247	0.00240867	0.00829335	361	289
ADAM23	0.237546	5.03769e-06	4.17328e-05	361	307
ADAM33	-0.13351	0.0111084	0.029619	361	349
ADAM3A	0.172466	0.00100122	0.00395544	361	5
ADAMTS14	0.151234	0.00397588	0.0125463	361	355
ADAMTS15	-0.142714	0.0066061	0.0191658	361	304
ADAMTS16	0.240327	3.87018e-06	3.31361e-05	361	304
ADAMTS17	0.137633	0.00883339	0.0245112	361	361
ADAMTS19	0.130146	0.0133335	0.0344718	361	27
ADAMTS1	-0.201882	0.000112325	0.000611856	361	361
ADAMTS20	0.303894	3.77127e-09	7.53308e-08	361	106
ADAMTS6	0.31967	5.08286e-10	1.2405e-08	361	353
ADAMTS8	-0.23793	4.85863e-06	4.05022e-05	361	350
ADAMTSL1	-0.141715	0.00699962	0.0200745	361	360
ADAMTSL2	-0.154654	0.00321926	0.0105603	361	361
ADAMTSL4	-0.14567	0.00555514	0.0166037	361	361
ADAMTSL5	0.163904	0.00178088	0.0064578	361	361
ADARB1	-0.146702	0.00522546	0.0157854	361	361
ADAT2	0.322939	3.30559e-10	8.39679e-09	361	361
ADA	0.214178	4.0786e-05	0.000257531	361	361
ADCK1	-0.151666	0.00387228	0.0122816	361	361
ADCY4	-0.243616	2.82161e-06	2.51308e-05	361	361
ADCY6	0.149391	0.00444723	0.0138126	361	361
ADCY8	-0.274732	1.13157e-07	1.53614e-06	361	168
ADCYAP1	-0.175572	0.000807041	0.00329079	361	277
ADH1A	-0.168287	0.00133067	0.00503043	361	361
ADH1B	-0.312251	1.32368e-09	2.929e-08	361	361
ADH1C	-0.296237	9.56381e-09	1.71588e-07	361	361
ADH4	-0.250742	1.40094e-06	1.36964e-05	361	361
ADH5	-0.143985	0.00613423	0.0179863	361	361
ADH6	-0.273123	1.35007e-07	1.78412e-06	361	361
ADHFE1	-0.192956	0.000225867	0.00110901	361	361
ADI1	-0.353146	4.83239e-12	1.75615e-10	361	361
ADIG	-0.148622	0.00465831	0.0143585	361	199
ADK	-0.175256	0.000825097	0.0033548	361	361
ADM2	0.224575	1.65286e-05	0.00011777	361	360
ADNP2	0.157445	0.00270144	0.00912005	361	361
ADNP	0.218843	2.73417e-05	0.000181564	361	361
ADORA2B	0.160994	0.00215273	0.00756781	361	357
ADORA3	0.13153	0.0123746	0.0324263	361	361
ADPGK	0.331539	1.03989e-10	2.96696e-09	361	361
ADRA1A	-0.160115	0.00227816	0.00792928	361	339
ADRA1B	-0.308292	2.18247e-09	4.6036e-08	361	361
ADRA1D	-0.177672	0.000696189	0.00289812	361	316
ADRA2B	-0.177637	0.000697904	0.00290344	361	361
ADRA2C	-0.238067	4.79615e-06	4.00651e-05	361	358
ADRB1	-0.206301	7.85797e-05	0.000450724	361	331
ADRB2	-0.19066	0.000269012	0.0012896	361	361
ADRBK1	0.15787	0.00262969	0.00891712	361	361
ADRBK2	-0.204745	8.91954e-05	0.000501214	361	361
ADSL	0.272034	1.5205e-07	1.97784e-06	361	361
AEBP1	-0.158078	0.00259515	0.00881199	361	361
AEBP2	0.139733	0.00784239	0.0221314	361	361
AEN	-0.134777	0.0103594	0.0278906	361	361
AES	-0.122398	0.020005	0.0483266	361	361
AFARP1	-0.219369	2.61217e-05	0.000174393	361	343
AFF2	0.190657	0.000269058	0.0012896	361	283
AFF4	-0.246888	2.05124e-06	1.90002e-05	361	361
AFG3L1	0.228227	1.19118e-05	8.83187e-05	361	361
AFMID	-0.17747	0.000706221	0.00293436	361	361
AFM	-0.222438	1.99712e-05	0.000138532	361	360
AFP	0.222709	1.94989e-05	0.000135539	361	357
AG2	-0.263901	3.63419e-07	4.23988e-06	361	361
AGAP4	0.208574	6.51997e-05	0.000384271	361	361
AGAP5	0.204976	8.75347e-05	0.00049356	361	359
AGAP6	0.212821	4.57434e-05	0.000283883	361	361
AGAP7	0.193907	0.000209975	0.00104099	361	360
AGAP8	0.195646	0.000183592	0.000929155	361	358
AGBL2	0.206593	7.67277e-05	0.000442395	361	358
AGBL5	0.180222	0.000580541	0.00248154	361	361
AGER	0.12248	0.0199212	0.0481587	361	361
AGFG1	0.18829	0.000321511	0.00150303	361	361
AGFG2	-0.187693	0.000336143	0.00155717	361	361
AGGF1	0.121624	0.0208097	0.0499488	361	361
AGPAT4	0.266967	2.62557e-07	3.19732e-06	361	361
AGPAT5	0.236268	5.68097e-06	4.63004e-05	361	361
AGPAT6	-0.155096	0.00313172	0.0103379	361	361
AGR2	0.20002	0.000130281	0.00069503	361	232
AGTPBP1	0.23318	7.57262e-06	5.94203e-05	361	361
AGTRAP	0.126504	0.0161764	0.0404237	361	361
AGXT2L1	-0.133458	0.0111398	0.0296789	361	356
AGXT2L2	-0.169564	0.00122069	0.00467051	361	361
AGXT2	-0.176749	0.000743052	0.00306565	361	358
AHCTF1	0.130754	0.0129045	0.033539	361	361
AHCY	0.168768	0.0012882	0.0048931	361	361
AHNAK2	-0.139812	0.00780739	0.0220514	361	358
AHR	-0.225478	1.52502e-05	0.000109681	361	361
AHSA2	0.154968	0.00315697	0.0104057	361	361
AIF1L	-0.173898	0.000906895	0.00364129	361	361
AIFM1	-0.300206	5.92407e-09	1.1279e-07	361	361
AIFM3	0.135032	0.0102142	0.0275594	361	360
AIG1	-0.147637	0.00494184	0.0150807	361	361
AIM2	0.138658	0.00833648	0.0233241	361	324
AIMP2	-0.143444	0.00633102	0.0184926	361	361
AJAP1	-0.137394	0.00895309	0.0247715	361	268
AK3L1	0.202717	0.000105055	0.000577945	361	361
AK3	-0.247535	1.92482e-06	1.79796e-05	361	361
AK7	0.133817	0.0109229	0.0291985	361	356
AKAP11	-0.177052	0.00072736	0.00300963	361	361
AKAP12	-0.12221	0.0201978	0.0487134	361	361
AKAP3	-0.163155	0.00187045	0.00672625	361	348
AKAP5	0.175322	0.000821295	0.0033407	361	361
AKAP6	-0.132391	0.0118094	0.0311749	361	360
AKAP8L	0.178973	0.000634744	0.00267873	361	361
AKAP8	0.155674	0.0030204	0.0100171	361	361
AKD1	0.298181	7.57072e-09	1.38959e-07	361	361
AKNAD1	0.1564	0.00288572	0.00965088	361	79
AKNA	0.136316	0.0095103	0.0259947	361	361
AKR1C3	0.131056	0.0126957	0.0330632	361	361
AKR1C4	-0.131449	0.0124287	0.0325209	361	360
AKR7A2	-0.133693	0.0109975	0.0293507	361	361
AKR7A3	-0.273069	1.35814e-07	1.7936e-06	361	361
AKR7L	-0.181907	0.000514151	0.00223859	361	361
AKTIP	-0.176914	0.000734479	0.00303657	361	361
ALAD	-0.21429	4.04e-05	0.00025558	361	361
ALAS1	-0.276359	9.45482e-08	1.32321e-06	361	361
ALDH18A1	0.133053	0.0113898	0.0302035	361	361
ALDH1A3	-0.200831	0.000122147	0.000657447	361	353
ALDH1B1	-0.232329	8.19146e-06	6.36356e-05	361	361
ALDH1L1	-0.217783	2.99662e-05	0.000196863	361	361
ALDH2	-0.316511	7.66517e-10	1.80439e-08	361	361
ALDH3A1	-0.211	5.32953e-05	0.000322889	361	348
ALDH3A2	-0.291663	1.64607e-08	2.78046e-07	361	361
ALDH3B1	0.125159	0.0173529	0.0429241	361	361
ALDH4A1	-0.385972	2.85526e-14	1.40055e-12	361	361
ALDH5A1	-0.226514	1.38994e-05	0.000101024	361	361
ALDH6A1	-0.220689	2.32838e-05	0.000158367	361	361
ALDH8A1	-0.142096	0.00684708	0.0197083	361	361
ALDH9A1	-0.174127	0.000892591	0.00359255	361	361
ALDOA	0.153009	0.00356516	0.0114875	361	361
ALDOC	0.156302	0.00290362	0.00969738	361	361
ALG10	0.260163	5.3721e-07	5.95025e-06	361	361
ALG1L	0.183473	0.000458879	0.00203441	361	359
ALG3	0.15971	0.0023383	0.00809585	361	361
ALG5	-0.155532	0.00304753	0.0100934	361	361
ALKBH6	0.148804	0.00460744	0.0142302	361	361
ALKBH7	-0.234231	6.87004e-06	5.47705e-05	361	361
ALMS1	0.246488	2.13339e-06	1.9697e-05	361	361
ALOX12B	0.161421	0.00209406	0.00739682	361	89
ALOX15B	0.172837	0.000975968	0.00387256	361	339
ALOX15	0.157765	0.00264729	0.00896766	361	304
ALPL	-0.165915	0.00155932	0.00576566	361	361
ALS2CL	0.133434	0.0111549	0.0297111	361	361
ALS2CR4	0.346261	1.31841e-11	4.51135e-10	361	361
ALS2	0.147908	0.00486228	0.0148744	361	361
ALX1	0.213054	4.48527e-05	0.000279361	361	67
ALX3	0.143453	0.00632806	0.0184866	361	349
AMAC1L2	0.152102	0.00377001	0.0120243	361	182
AMACR	-0.278899	7.12504e-08	1.02525e-06	361	361
AMBP	-0.135147	0.0101495	0.0274181	361	361
AMD1	0.182599	0.000488989	0.00214545	361	361
AMELY	0.163668	0.00180872	0.00653971	361	35
AMFR	-0.248504	1.74957e-06	1.65896e-05	361	361
AMH	0.135009	0.0102272	0.0275852	361	294
AMIGO1	-0.150403	0.00418255	0.0131153	361	360
AMIGO2	0.214613	3.93077e-05	0.000249781	361	361
AMIGO3	0.425747	2.50788e-17	1.62157e-15	361	361
AMMECR1	0.125879	0.0167145	0.0415827	361	361
AMOTL2	-0.148305	0.00474802	0.0145898	361	361
AMTN	0.149883	0.00431664	0.0134722	361	24
AMZ2P1	0.138484	0.0084191	0.0235156	361	361
ANAPC1	0.195878	0.000180304	0.000913909	361	361
ANAPC4	0.133269	0.0112561	0.0299046	361	361
ANAPC5	0.259789	5.58403e-07	6.14737e-06	361	361
ANAPC7	0.378573	9.5536e-14	4.30452e-12	361	361
ANGEL1	0.129683	0.013669	0.0351613	361	361
ANGPTL1	-0.243872	2.75252e-06	2.45924e-05	361	361
ANGPTL2	-0.224594	1.64996e-05	0.000117606	361	361
ANGPTL3	-0.213613	4.27861e-05	0.00026827	361	361
ANGPTL4	-0.164152	0.00175212	0.00637672	361	361
ANGPTL6	-0.203335	9.99574e-05	0.000552652	361	359
ANGPTL7	-0.149471	0.00442569	0.0137629	361	113
ANG	-0.209614	5.98174e-05	0.00035592	361	361
ANKAR	0.21624	3.42134e-05	0.000221149	361	360
ANKDD1A	0.130931	0.0127818	0.0332657	361	361
ANKFN1	-0.220347	2.39884e-05	0.000162383	361	112
ANKFY1	-0.225349	1.54267e-05	0.000110791	361	361
ANKH	0.130874	0.0128211	0.0333507	361	361
ANKK1	-0.138421	0.00844954	0.0235907	361	296
ANKLE1	0.317905	6.39769e-10	1.53137e-08	361	355
ANKLE2	0.347688	1.07295e-11	3.7226e-10	361	361
ANKMY1	-0.145944	0.00546597	0.0163987	361	361
ANKRD13A	0.165414	0.00161208	0.00592883	361	361
ANKRD13B	0.138629	0.00835039	0.0233565	361	361
ANKRD13D	0.25162	1.28333e-06	1.27088e-05	361	361
ANKRD20A4	0.135785	0.00979615	0.0266262	361	193
ANKRD20B	0.186035	0.000380177	0.00173373	361	330
ANKRD22	0.153551	0.00344772	0.0111954	361	353
ANKRD23	0.320521	4.54629e-10	1.12611e-08	361	361
ANKRD24	-0.25007	1.49796e-06	1.45026e-05	361	361
ANKRD26P1	0.245932	2.25254e-06	2.0606e-05	361	91
ANKRD26	0.25045	1.44234e-06	1.4053e-05	361	361
ANKRD27	0.243358	2.89289e-06	2.56738e-05	361	361
ANKRD29	-0.198144	0.00015106	0.00078794	361	360
ANKRD30A	0.258603	6.31223e-07	6.83939e-06	361	58
ANKRD32	0.437446	2.63234e-18	1.83297e-16	361	361
ANKRD34A	0.165886	0.00156237	0.00577371	361	360
ANKRD36B	0.287299	2.73922e-08	4.3849e-07	361	327
ANKRD36	0.343235	2.03367e-11	6.70102e-10	361	361
ANKRD37	-0.189415	0.000295491	0.00139713	361	361
ANKRD39	0.238768	4.48865e-06	3.77338e-05	361	361
ANKRD40	0.136742	0.00928679	0.0255063	361	361
ANKRD45	0.170732	0.00112758	0.00438076	361	329
ANKRD46	-0.149096	0.0045272	0.0140216	361	361
ANKRD49	0.241683	3.39912e-06	2.95864e-05	361	361
ANKRD52	0.287782	2.59015e-08	4.18353e-07	361	361
ANKRD55	-0.226188	1.43117e-05	0.000103738	361	327
ANKRD57	-0.181436	0.000531947	0.00230649	361	361
ANKRD58	0.135493	0.0099565	0.0269847	361	360
ANKRD5	0.185741	0.000388537	0.00176499	361	361
ANKRD7	0.252359	1.19165e-06	1.18831e-05	361	102
ANKS3	0.130034	0.013414	0.0346262	361	361
ANKS4B	-0.142083	0.00685205	0.0197109	361	356
ANLN	0.622924	3.51031e-40	1.05921e-37	361	361
ANO10	0.154093	0.00333363	0.0108826	361	361
ANO2	-0.148574	0.00467183	0.0143912	361	350
ANO5	0.140928	0.0073239	0.0208723	361	349
ANO7	0.16455	0.00170677	0.00622761	361	361
ANO9	0.21486	3.84892e-05	0.000245835	361	356
ANP32A	0.204783	8.89186e-05	0.000499806	361	361
ANP32B	0.13334	0.0112127	0.0298252	361	361
ANP32E	0.304244	3.6116e-09	7.25051e-08	361	361
ANTXR2	-0.208839	6.37826e-05	0.000376811	361	361
ANXA10	-0.220586	2.34944e-05	0.000159739	361	359
ANXA13	0.144432	0.0059757	0.0176045	361	354
ANXA2P1	0.172285	0.00101378	0.0039987	361	361
ANXA2P2	0.150957	0.00404379	0.0127303	361	361
ANXA2	0.121772	0.0206532	0.0496413	361	361
ANXA5	0.163949	0.00177559	0.00644331	361	361
AOC3	-0.162724	0.00192388	0.006896	361	361
AOX1	-0.307095	2.53519e-09	5.27569e-08	361	361
AP1G1	-0.17004	0.00118197	0.0045477	361	361
AP1G2	0.186362	0.0003711	0.00169662	361	361
AP1M2	0.194511	0.000200429	0.000999385	361	326
AP1S3	0.258089	6.65567e-07	7.17638e-06	361	361
AP2B1	-0.142423	0.00671837	0.0194133	361	361
AP3B1	0.159487	0.00237189	0.0081936	361	361
AP3S2	-0.139369	0.00800695	0.0225319	361	361
AP4E1	0.332751	8.80951e-11	2.55002e-09	361	361
APAF1	0.316805	7.37885e-10	1.74047e-08	361	361
APBB1IP	0.141767	0.00697849	0.0200234	361	361
APBB1	0.130633	0.0129887	0.0337133	361	361
APBB2	-0.15267	0.00364063	0.011679	361	361
APCDD1L	0.192889	0.000227036	0.00111365	361	169
APCS	-0.251972	1.23874e-06	1.23101e-05	361	361
APH1B	0.203892	9.55659e-05	0.000531619	361	361
APIP	0.127758	0.0151428	0.0382798	361	361
APITD1	0.199924	0.000131277	0.000699782	361	361
APLF	0.13634	0.0094978	0.0259748	361	361
APLNR	-0.238503	4.60241e-06	3.85762e-05	361	361
APOA1	-0.122936	0.019462	0.0472667	361	361
APOA5	-0.235981	5.83555e-06	4.7454e-05	361	361
APOBEC2	0.163263	0.00185737	0.00669373	361	332
APOBEC3A	0.277513	8.31713e-08	1.17806e-06	361	347
APOBEC3B	0.31465	9.74188e-10	2.22488e-08	361	352
APOB	-0.149513	0.00441445	0.0137333	361	361
APOC1	-0.199017	0.000141028	0.00074478	361	361
APOC2	-0.130674	0.01296	0.0336505	361	361
APOC3	-0.166843	0.00146592	0.00546292	361	361
APOC4	-0.269373	2.02852e-07	2.53916e-06	361	361
APOD	-0.181443	0.000531699	0.00230592	361	359
APOLD1	-0.234892	6.46033e-06	5.19618e-05	361	361
APPL1	0.238998	4.39148e-06	3.70421e-05	361	361
AQP10	0.153517	0.00345495	0.0112079	361	200
AQP11	-0.150853	0.00406946	0.0128028	361	361
AQP1	-0.273898	1.24022e-07	1.66659e-06	361	361
AQP6	-0.21252	4.692e-05	0.00028983	361	288
AQP7	-0.162018	0.00201445	0.0071639	361	359
AQP9	-0.258065	6.67213e-07	7.19023e-06	361	361
AQPEP	0.226134	1.43804e-05	0.000104065	361	279
AQR	0.27293	1.37892e-07	1.81742e-06	361	361
ARAF	-0.147659	0.00493548	0.0150659	361	361
ARAP3	-0.129828	0.013563	0.0349292	361	361
ARF3	0.160715	0.00219181	0.00766999	361	361
ARF4	0.173033	0.000962871	0.00383358	361	361
ARFGAP1	0.212222	4.81095e-05	0.000295893	361	361
ARFIP2	0.258835	6.16339e-07	6.69634e-06	361	361
ARGFXP2	0.179871	0.000595294	0.00253318	361	163
ARGLU1	0.181195	0.000541277	0.00234032	361	361
ARHGAP11A	0.718916	1.14962e-58	7.63158e-55	361	361
ARHGAP11B	0.560399	3.0752e-31	4.22362e-29	361	328
ARHGAP17	0.142222	0.00679714	0.0195926	361	361
ARHGAP18	0.163913	0.00177979	0.00645501	361	361
ARHGAP19	0.33466	6.77339e-11	2.01632e-09	361	361
ARHGAP27	0.143041	0.00648155	0.0188466	361	361
ARHGAP33	0.483527	1.49775e-22	1.30251e-20	361	361
ARHGAP6	-0.162099	0.0020039	0.00713655	361	360
ARHGEF10	-0.200729	0.000123146	0.000661752	361	361
ARHGEF11	0.125085	0.0174198	0.0430577	361	361
ARHGEF12	-0.176025	0.000781853	0.00319922	361	361
ARHGEF15	-0.279693	6.5186e-08	9.47576e-07	361	361
ARHGEF1	0.201372	0.000116997	0.000633666	361	361
ARHGEF2	0.249913	1.52153e-06	1.46907e-05	361	361
ARHGEF35	0.210958	5.3484e-05	0.000323749	361	361
ARHGEF37	-0.158935	0.00245718	0.00843556	361	361
ARHGEF38	0.135415	0.01	0.0270731	361	138
ARHGEF5	0.197105	0.000163867	0.000843989	361	360
ARHGEF9	-0.154918	0.00316671	0.010424	361	361
ARID2	0.131141	0.012638	0.0329517	361	361
ARID3A	0.294025	1.24513e-08	2.16377e-07	361	361
ARID3B	0.422247	4.84021e-17	3.07964e-15	361	361
ARID5B	0.132852	0.0115161	0.0304896	361	361
ARIH2	0.282643	4.67145e-08	7.03189e-07	361	361
ARL13B	0.230558	9.63699e-06	7.3561e-05	361	361
ARL16	0.207614	7.05626e-05	0.000411495	361	361
ARL17A	0.251483	1.30094e-06	1.28577e-05	361	361
ARL6IP1	0.159698	0.00234004	0.00810045	361	361
ARL6IP6	0.311166	1.51937e-09	3.31053e-08	361	361
ARL8A	-0.222572	1.97355e-05	0.000137088	361	361
ARL8B	0.224164	1.71428e-05	0.000121438	361	361
ARMC2	0.189506	0.000293486	0.00138897	361	361
ARMC3	0.222041	2.06806e-05	0.000143054	361	111
ARMC5	-0.158013	0.00260577	0.00884656	361	361
ARMC8	0.263585	3.75699e-07	4.36239e-06	361	361
ARMC9	0.137454	0.00892306	0.0247084	361	361
ARNTL2	0.289847	2.03687e-08	3.37755e-07	361	356
ARPC2	0.131229	0.0125777	0.0328246	361	361
ARPC3	0.271354	1.63729e-07	2.11382e-06	361	361
ARPC4	0.147515	0.0049781	0.0151844	361	361
ARPC5L	0.125617	0.0169445	0.0420768	361	361
ARPP19	0.201788	0.000113175	0.000615478	361	361
ARRB2	0.142415	0.00672165	0.0194199	361	361
ARRDC1	0.131622	0.0123133	0.0322955	361	361
ARSA	-0.207431	7.16339e-05	0.000416333	361	361
ARSD	-0.254975	9.14925e-07	9.4604e-06	361	361
ARSG	-0.144455	0.00596758	0.0175909	361	361
ARSJ	0.18812	0.000325616	0.0015183	361	359
ART5	0.142831	0.00656133	0.0190591	361	244
ARTN	0.151539	0.00390256	0.012356	361	350
AR	-0.209125	6.22943e-05	0.000369223	361	351
ASAP1	0.14403	0.00611798	0.017944	361	361
ASAP3	0.146046	0.00543309	0.0163148	361	361
ASB13	-0.158255	0.00256604	0.00872507	361	361
ASB14	0.173274	0.000946932	0.00377919	361	349
ASB16	0.158865	0.00246822	0.0084589	361	355
ASB3	0.201862	0.000112507	0.000612513	361	361
ASB4	-0.170378	0.00115511	0.00446075	361	311
ASB6	0.191802	0.000246671	0.00119699	361	361
ASB8	-0.232309	8.20693e-06	6.37197e-05	361	361
ASB9	0.167992	0.00135734	0.00511698	361	361
ASCC3	0.184614	0.000422124	0.00189125	361	361
ASF1A	0.148802	0.00460812	0.0142302	361	361
ASF1B	0.563742	1.14052e-31	1.59954e-29	361	361
ASGR1	-0.183189	0.000468472	0.00207003	361	361
ASGR2	-0.173598	0.000925976	0.00370648	361	361
ASL	-0.172561	0.000994742	0.00393452	361	361
ASMTL	-0.250703	1.40644e-06	1.37368e-05	361	361
ASNS	0.143076	0.0064686	0.0188222	361	361
ASPDH	-0.301754	4.90466e-09	9.50158e-08	361	355
ASPHD2	0.178024	0.000679041	0.0028386	361	360
ASPM	0.61582	4.60538e-39	1.1323e-36	361	361
ASPN	-0.145861	0.00549281	0.0164569	361	361
ASPSCR1	-0.188327	0.0003206	0.00149912	361	361
ASRGL1	0.301069	5.33292e-09	1.02713e-07	361	361
ASS1	-0.136424	0.00945323	0.0258707	361	361
ASTE1	0.148115	0.00480235	0.0147273	361	361
ASTN1	-0.24892	1.67907e-06	1.60147e-05	361	330
ASXL1	0.264173	3.5312e-07	4.14645e-06	361	361
ASZ1	0.129345	0.0139184	0.0356613	361	39
ATAD1	-0.197585	0.000157832	0.000818124	361	361
ATAD2B	0.163886	0.00178296	0.00646415	361	361
ATAD2	0.468553	4.22597e-21	3.43511e-19	361	361
ATAD3A	0.21182	4.97626e-05	0.000305024	361	361
ATAD3B	0.278919	7.10917e-08	1.02371e-06	361	361
ATAD5	0.585982	1.15451e-34	2.03469e-32	361	361
ATF3	-0.172007	0.00103337	0.00406309	361	361
ATF4	0.147406	0.00501055	0.015274	361	361
ATF6B	0.125451	0.0170918	0.0423784	361	361
ATF6	-0.125617	0.0169448	0.0420768	361	361
ATG12	0.163172	0.00186836	0.00672118	361	361
ATG16L2	0.184055	0.00043976	0.001961	361	361
ATG4A	-0.286149	3.12802e-08	4.9558e-07	361	361
ATG9B	0.1462	0.00538359	0.0161933	361	355
ATIC	0.144104	0.00609164	0.0178799	361	361
ATL2	0.132847	0.0115191	0.0304934	361	361
ATMIN	-0.229288	1.08195e-05	8.13094e-05	361	361
ATN1	0.183848	0.000446472	0.00198782	361	361
ATOH1	0.181076	0.000545939	0.00235776	361	15
ATOH8	-0.383755	4.11336e-14	1.96917e-12	361	361
ATOX1	-0.165629	0.00158926	0.00585679	361	361
ATP10A	-0.16182	0.0020405	0.00724101	361	359
ATP11B	0.208478	6.57154e-05	0.000386853	361	361
ATP13A1	0.184326	0.000431112	0.00192563	361	361
ATP13A2	0.196554	0.000171075	0.000874253	361	361
ATP1A1	0.170598	0.00113788	0.00441215	361	361
ATP1A2	-0.264702	3.33956e-07	3.94234e-06	361	354
ATP1B3	0.158664	0.00250013	0.00854325	361	361
ATP2A1	0.144745	0.00586666	0.0173577	361	354
ATP2A2	0.137115	0.0090946	0.0250857	361	361
ATP2B1	0.215297	3.70853e-05	0.000237707	361	361
ATP2B4	-0.192068	0.000241722	0.00117757	361	361
ATP2C1	0.133209	0.0112934	0.0299838	361	361
ATP4A	0.133287	0.0112448	0.0298825	361	110
ATP5D	-0.147315	0.0050379	0.0153363	361	361
ATP5F1	-0.135104	0.010174	0.0274759	361	361
ATP5G2	0.147707	0.00492132	0.0150273	361	361
ATP6V0A1	-0.387569	2.19082e-14	1.09349e-12	361	361
ATP6V0A2	0.166826	0.00146754	0.00546791	361	361
ATP6V0A4	0.164865	0.00167168	0.00611752	361	113
ATP6V0D1	-0.152908	0.00358751	0.0115439	361	361
ATP6V0D2	0.2141	4.10585e-05	0.000258841	361	331
ATP6V0E1	-0.157287	0.00272866	0.00919947	361	361
ATP6V0E2	-0.358383	2.21522e-12	8.37119e-11	361	361
ATP6V1C2	0.260181	5.36208e-07	5.94358e-06	361	361
ATP6V1F	0.131357	0.0124911	0.0326634	361	361
ATP6V1G2	0.14553	0.0056013	0.0167241	361	354
ATP8B2	0.304737	3.39826e-09	6.85677e-08	361	361
ATPAF1	-0.192974	0.000225566	0.00110808	361	361
ATPAF2	-0.130259	0.0132532	0.0342954	361	361
ATPBD4	0.33376	7.66782e-11	2.25234e-09	361	361
ATRIP	0.197327	0.000161051	0.000832211	361	361
ATRNL1	0.172341	0.00100991	0.00398581	361	323
ATR	0.165547	0.00159795	0.00588227	361	361
ATXN2L	0.313199	1.17312e-09	2.63688e-08	361	361
ATXN2	0.133471	0.0111325	0.0296672	361	361
ATXN7L1	-0.191246	0.000257313	0.00124395	361	361
ATXN7L2	0.18673	0.0003611	0.00165546	361	361
ATXN7L3	0.242978	3.00113e-06	2.65162e-05	361	361
AUH	-0.21444	3.98898e-05	0.000252979	361	361
AUP1	0.134567	0.0104808	0.0281643	361	361
AURKAPS1	0.506817	5.92372e-25	5.98837e-23	361	357
AURKA	0.561147	2.46511e-31	3.40922e-29	361	361
AURKB	0.58145	4.91387e-34	8.08758e-32	361	361
AVPI1	-0.194544	0.00019993	0.000997673	361	361
AVPR2	-0.233409	7.41386e-06	5.84509e-05	361	336
AXIN1	0.139042	0.00815692	0.0229054	361	361
AXIN2	-0.204376	9.19031e-05	0.000513971	361	361
AZGP1	-0.2072	7.30047e-05	0.000423381	361	361
AZI1	0.435347	3.97051e-18	2.73154e-16	361	361
AZI2	0.278247	7.66416e-08	1.09257e-06	361	361
B3GALNT1	0.165825	0.00156871	0.00579392	361	360
B3GALT4	-0.142096	0.00684718	0.0197083	361	361
B3GAT2	0.188938	0.000306265	0.00144088	361	328
B3GNT4	0.153718	0.00341221	0.0111036	361	292
B3GNT5	0.142549	0.00666975	0.0192915	361	361
B4GALNT3	-0.122931	0.0194671	0.0472732	361	324
B4GALT3	0.144939	0.00580002	0.0172142	361	361
B4GALT4	0.291695	1.64001e-08	2.77256e-07	361	361
B4GALT5	0.138978	0.00818665	0.0229759	361	361
B4GALT6	0.179793	0.000598662	0.00254533	361	361
B9D2	-0.130359	0.0131818	0.0341507	361	361
BAALC	-0.211131	5.27177e-05	0.000320083	361	361
BAAT	-0.234189	6.89702e-06	5.49636e-05	361	361
BACE1	-0.265654	3.01907e-07	3.60244e-06	361	361
BACH1	0.169075	0.00126183	0.00480668	361	361
BACH2	-0.143534	0.00629812	0.0184072	361	360
BAG1	-0.1562	0.0029223	0.00974999	361	361
BAGE2	0.230096	1.0052e-05	7.63412e-05	361	256
BAGE	0.314321	1.01617e-09	2.31811e-08	361	136
BAHD1	0.185519	0.000394942	0.00179082	361	361
BAI2	0.122387	0.0200166	0.0483425	361	336
BAI3	-0.12227	0.0201368	0.0485854	361	252
BAIAP2L1	0.25107	1.35577e-06	1.33137e-05	361	361
BAIAP2L2	0.189589	0.000291659	0.00138113	361	361
BAIAP2	-0.273297	1.3246e-07	1.75745e-06	361	361
BAIAP3	-0.128613	0.0144716	0.0368309	361	361
BAK1	0.252354	1.19218e-06	1.18831e-05	361	361
BANF1	0.127143	0.0156423	0.039303	361	361
BANK1	0.132	0.0120631	0.031727	361	311
BAP1	0.206669	7.62517e-05	0.000439905	361	361
BARD1	0.304809	3.36818e-09	6.80298e-08	361	337
BARHL2	0.164802	0.00167858	0.00613939	361	15
BARX1	0.174729	0.000856028	0.00346571	361	248
BASE	0.149388	0.0044481	0.0138132	361	47
BAT1	0.288997	2.24904e-08	3.68639e-07	361	361
BAT2L1	0.160243	0.00225945	0.00787624	361	361
BAT2L2	0.12823	0.0147689	0.037444	361	361
BAT2	0.275222	1.07207e-07	1.46636e-06	361	361
BAZ1A	0.175416	0.000815898	0.00332282	361	361
BAZ1B	0.145131	0.00573473	0.0170458	361	361
BAZ2A	0.29391	1.26216e-08	2.18763e-07	361	361
BAZ2B	-0.162504	0.00195178	0.0069809	361	361
BBS1	-0.14052	0.00749755	0.021291	361	361
BBS2	-0.240618	3.76429e-06	3.23826e-05	361	361
BBS7	0.247132	2.00264e-06	1.8628e-05	361	361
BCAP31	-0.189951	0.000283813	0.00134863	361	361
BCAS3	-0.276409	9.40247e-08	1.31681e-06	361	361
BCAS4	0.144687	0.00588673	0.0174065	361	361
BCAT1	0.21523	3.72975e-05	0.000238913	361	361
BCAT2	0.217197	3.15174e-05	0.000205793	361	361
BCKDHA	-0.329442	1.38329e-10	3.81027e-09	361	361
BCKDK	-0.259519	5.74249e-07	6.28361e-06	361	361
BCL10	0.133736	0.0109715	0.029293	361	361
BCL2L11	0.150217	0.00423015	0.0132375	361	361
BCL2L12	0.249171	1.63774e-06	1.5658e-05	361	361
BCL2L13	-0.156044	0.00295117	0.00982982	361	361
BCL2L14	0.191113	0.000259939	0.00125283	361	345
BCL2L1	-0.250472	1.43922e-06	1.40363e-05	361	361
BCL2	-0.143188	0.00642634	0.0187215	361	361
BCL6B	-0.208764	6.41803e-05	0.000378487	361	361
BCL9L	0.12373	0.0186852	0.0456405	361	361
BCL9	0.215399	3.67644e-05	0.000235927	361	361
BCO2	-0.233376	7.43677e-06	5.86084e-05	361	361
BCORL1	0.138478	0.00842219	0.023521	361	361
BCOR	0.191287	0.00025652	0.00124086	361	361
BCS1L	-0.138238	0.008537	0.0237949	361	361
BDH1	-0.286261	3.08794e-08	4.9001e-07	361	361
BDKRB1	0.155937	0.00297097	0.00989081	361	351
BDNFOS	-0.238661	4.53407e-06	3.80514e-05	361	361
BDP1	0.13458	0.0104732	0.0281513	361	361
BEGAIN	-0.155692	0.00301698	0.0100122	361	335
BEND3	0.288877	2.28062e-08	3.72895e-07	361	361
BEST1	0.22582	1.47905e-05	0.000106606	361	360
BEST2	0.171215	0.00109095	0.00425419	361	56
BEST4	0.139486	0.00795377	0.0224139	361	342
BEX2	0.192937	0.000226204	0.00111018	361	343
BEX5	0.153195	0.00352459	0.0113801	361	354
BEYLA	0.174319	0.000880792	0.00355152	361	17
BFSP1	0.252066	1.22723e-06	1.22018e-05	361	361
BFSP2	0.251337	1.32008e-06	1.30145e-05	361	269
BGN	-0.125005	0.0174927	0.043195	361	361
BHLHA15	0.154834	0.00318343	0.0104652	361	334
BHLHE22	-0.137803	0.00874913	0.0243165	361	320
BICD1	0.155612	0.00303231	0.0100526	361	357
BID	0.151737	0.00385552	0.0122441	361	361
BIK	-0.12541	0.0171283	0.0424535	361	349
BIN1	0.171444	0.00107399	0.00419794	361	361
BIRC5	0.544229	3.1937e-29	3.902e-27	361	361
BIRC7	0.135918	0.00972392	0.026469	361	270
BIRC8	0.142612	0.00664546	0.0192417	361	6
BLCAP	-0.343402	1.98592e-11	6.58064e-10	361	361
BLM	0.591027	2.24155e-35	4.13338e-33	361	361
BLOC1S2	-0.197825	0.000154887	0.000805585	361	361
BLOC1S3	0.207416	7.17218e-05	0.000416668	361	361
BLVRA	0.179052	0.0006312	0.00266603	361	361
BLVRB	-0.219912	2.49162e-05	0.000167355	361	361
BLZF1	0.145698	0.00554593	0.0165812	361	361
BMF	0.212695	4.62309e-05	0.000286284	361	361
BMI1	0.133478	0.0111281	0.0296636	361	361
BMP10	-0.167498	0.00140304	0.00526006	361	70
BMP1	-0.237857	4.89228e-06	4.07145e-05	361	361
BMP3	-0.122387	0.0200167	0.0483425	361	99
BMP4	-0.142702	0.00661078	0.0191742	361	361
BMP6	-0.299234	6.66571e-09	1.24763e-07	361	361
BMP8A	0.127298	0.0155149	0.0390322	361	361
BMPER	-0.179212	0.000624035	0.00263884	361	323
BMPR1A	0.12499	0.0175061	0.0432174	361	361
BMX	-0.275532	1.03607e-07	1.42521e-06	361	341
BOC	-0.195818	0.000181146	0.000917944	361	361
BOK	-0.405568	1.00202e-15	5.71785e-14	361	361
BOLA2	0.148576	0.00467115	0.0143912	361	361
BOLA3	0.140409	0.00754527	0.0214082	361	361
BOLL	0.297047	8.67867e-09	1.56981e-07	361	87
BPESC1	0.248873	1.68687e-06	1.6066e-05	361	133
BPHL	-0.263324	3.86169e-07	4.46865e-06	361	361
BPI	-0.210128	5.73138e-05	0.000343486	361	271
BPTF	0.144923	0.00580556	0.0172281	361	361
BPY2	0.18515	0.000405831	0.00182771	361	106
BRAF	0.164889	0.00166904	0.00610897	361	361
BRAP	0.214199	4.07127e-05	0.000257231	361	361
BRCA1	0.525182	5.54004e-27	6.09558e-25	361	361
BRCA2	0.435199	4.08639e-18	2.79263e-16	361	358
BRD3	0.158221	0.00257163	0.00874109	361	361
BRD4	0.187777	0.000334055	0.00155002	361	361
BRD8	0.268576	2.21001e-07	2.73199e-06	361	361
BRD9	0.310154	1.72688e-09	3.7099e-08	361	361
BRDT	0.202285	0.000108756	0.000594697	361	55
BRI3BP	0.306196	2.83571e-09	5.82198e-08	361	361
BRIP1	0.385775	2.94943e-14	1.43965e-12	361	358
BRIX1	0.371967	2.73802e-13	1.17516e-11	361	361
BRPF1	0.416696	1.35223e-16	8.28608e-15	361	361
BRSK1	0.242651	3.0972e-06	2.72803e-05	361	361
BSDC1	-0.17692	0.000734133	0.00303577	361	361
BSND	0.189104	0.000302469	0.00142606	361	160
BSN	0.136993	0.00915672	0.0252221	361	361
BSPRY	0.213915	4.17075e-05	0.000262352	361	354
BST1	-0.146192	0.00538613	0.0161933	361	361
BTAF1	0.144648	0.00590021	0.017428	361	361
BTBD10	0.162102	0.00200349	0.00713639	361	361
BTBD17	0.187946	0.000329868	0.00153466	361	93
BTBD3	0.17442	0.000874603	0.00352871	361	361
BTBD9	-0.146174	0.00539184	0.0162081	361	361
BTC	0.127944	0.0149945	0.0379387	361	284
BTD	-0.190665	0.000268906	0.00128949	361	361
BTG3	0.249018	1.66272e-06	1.58663e-05	361	361
BTN1A1	0.158416	0.00253988	0.0086576	361	150
BTN2A1	0.156218	0.00291901	0.00974226	361	361
BTN2A3	0.151987	0.00379678	0.0120945	361	358
BTNL9	-0.28038	6.0337e-08	8.82888e-07	361	361
BUB1B	0.707089	5.52598e-56	2.201e-52	361	361
BUB1	0.63976	5.99266e-43	2.91083e-40	361	361
BUB3	0.387882	2.07981e-14	1.04331e-12	361	361
BUD13	0.212047	4.88236e-05	0.000299921	361	361
C10orf105	-0.170019	0.00118363	0.00455232	361	359
C10orf108	-0.129834	0.0135584	0.0349219	361	358
C10orf10	-0.181177	0.000542006	0.00234246	361	361
C10orf110	0.248573	1.73766e-06	1.65024e-05	361	356
C10orf111	0.161623	0.00206682	0.00731616	361	344
C10orf114	0.16113	0.00213389	0.00751217	361	361
C10orf116	-0.209791	5.89442e-05	0.000351881	361	361
C10orf119	0.177132	0.000723284	0.00299479	361	361
C10orf125	-0.217848	2.97972e-05	0.000196096	361	361
C10orf12	0.15314	0.00353641	0.0114071	361	361
C10orf137	0.224055	1.73105e-05	0.000122508	361	361
C10orf140	0.300818	5.49859e-09	1.05597e-07	361	361
C10orf18	0.208911	6.34084e-05	0.000375045	361	361
C10orf26	-0.245318	2.39176e-06	2.17696e-05	361	361
C10orf2	0.124646	0.0178217	0.0438767	361	361
C10orf32	-0.132346	0.0118382	0.0312385	361	361
C10orf35	0.18053	0.000567827	0.0024366	361	355
C10orf55	0.123412	0.0189927	0.0463131	361	296
C10orf57	-0.269154	2.07682e-07	2.58823e-06	361	361
C10orf62	0.129299	0.0139523	0.035724	361	299
C10orf67	0.164122	0.00175551	0.00638439	361	141
C10orf72	-0.363164	1.07327e-12	4.2663e-11	361	361
C10orf76	-0.135004	0.0102304	0.0275882	361	361
C10orf78	0.413538	2.40514e-16	1.44708e-14	361	361
C10orf81	0.168698	0.00129435	0.0049099	361	279
C10orf82	0.194543	0.000199941	0.000997673	361	78
C10orf88	0.206573	7.68534e-05	0.000442992	361	361
C10orf91	0.27317	1.34316e-07	1.77616e-06	361	152
C10orf95	0.161623	0.00206674	0.00731616	361	336
C10orf96	0.174217	0.000887074	0.00357396	361	15
C11orf17	0.141322	0.00715974	0.0204659	361	361
C11orf1	-0.192665	0.000230955	0.00112954	361	361
C11orf48	0.142579	0.00665807	0.0192642	361	361
C11orf49	0.153631	0.00343076	0.0111494	361	361
C11orf54	-0.232298	8.21509e-06	6.37334e-05	361	361
C11orf61	0.270063	1.88306e-07	2.38556e-06	361	361
C11orf66	-0.279602	6.58562e-08	9.55923e-07	361	361
C11orf67	-0.174942	0.000843359	0.00341928	361	361
C11orf70	0.15273	0.00362711	0.011645	361	225
C11orf71	-0.259432	5.7944e-07	6.33345e-06	361	361
C11orf80	0.293978	1.2521e-08	2.17399e-07	361	361
C11orf82	0.597423	2.69129e-36	5.3597e-34	361	361
C11orf84	0.4186	9.52715e-17	5.94775e-15	361	361
C11orf93	0.175893	0.000789128	0.00322633	361	357
C11orf95	-0.141791	0.00696876	0.0200033	361	361
C12orf11	0.17141	0.0010765	0.00420609	361	361
C12orf24	0.397676	3.96623e-15	2.14058e-13	361	361
C12orf27	0.122482	0.0199196	0.0481587	361	357
C12orf32	0.434713	4.49237e-18	3.02248e-16	361	361
C12orf34	0.181714	0.000521398	0.00226668	361	361
C12orf35	-0.161894	0.00203069	0.00721261	361	361
C12orf39	0.210427	5.59084e-05	0.000336278	361	305
C12orf41	0.266251	2.83347e-07	3.41165e-06	361	361
C12orf43	0.223947	1.74772e-05	0.000123512	361	361
C12orf47	0.142327	0.00675608	0.0194968	361	361
C12orf48	0.645224	6.94838e-44	4.06991e-41	361	361
C12orf49	0.166285	0.0015215	0.00564996	361	361
C12orf4	0.184117	0.000437787	0.00195264	361	361
C12orf56	0.352297	5.47658e-12	1.97321e-10	361	129
C12orf65	0.298561	7.23162e-09	1.3335e-07	361	361
C12orf68	-0.258364	6.46999e-07	6.9951e-06	361	359
C12orf70	0.206916	7.47232e-05	0.000432339	361	251
C12orf72	-0.263419	3.82305e-07	4.42909e-06	361	361
C12orf73	0.232327	8.19291e-06	6.36356e-05	361	361
C12orf75	0.269888	1.9189e-07	2.42326e-06	361	361
C12orf76	0.221376	2.19249e-05	0.00015072	361	361
C13orf15	-0.260232	5.33379e-07	5.92428e-06	361	361
C13orf16	-0.129521	0.0137877	0.0353981	361	275
C13orf1	-0.254581	9.52272e-07	9.81092e-06	361	361
C13orf23	0.315623	8.59545e-10	1.99045e-08	361	361
C13orf26	-0.171877	0.00104262	0.00409622	361	46
C13orf29	0.164138	0.00175368	0.00637891	361	361
C13orf34	0.495764	8.62786e-24	8.26077e-22	361	361
C13orf37	0.379159	8.6926e-14	3.95236e-12	361	361
C13orf38	0.168868	0.0012796	0.00486508	361	77
C14orf106	0.314827	9.52306e-10	2.18241e-08	361	361
C14orf109	0.131715	0.0122512	0.0321536	361	361
C14orf118	0.187016	0.000353513	0.00162517	361	361
C14orf143	0.315356	8.89614e-10	2.05292e-08	361	361
C14orf145	0.442002	1.06851e-18	7.49271e-17	361	360
C14orf159	-0.130347	0.01319	0.0341675	361	361
C14orf169	0.206213	7.91476e-05	0.000453459	361	361
C14orf174	0.153206	0.00352208	0.0113768	361	306
C14orf180	-0.166139	0.00153633	0.00569226	361	203
C14orf181	0.166251	0.00152492	0.00565885	361	361
C14orf182	-0.193916	0.000209842	0.00104059	361	349
C14orf23	0.187223	0.00034813	0.00160301	361	18
C14orf28	-0.269291	2.04654e-07	2.55704e-06	361	361
C14orf39	0.153262	0.00350992	0.0113429	361	41
C14orf49	0.134334	0.0106164	0.0284748	361	361
C14orf53	-0.300074	6.01987e-09	1.14068e-07	361	185
C14orf68	-0.215335	3.69636e-05	0.000237003	361	359
C14orf79	-0.192331	0.00023693	0.00115507	361	361
C14orf80	0.304941	3.31348e-09	6.69929e-08	361	361
C14orf93	0.288559	2.3666e-08	3.84742e-07	361	361
C15orf17	0.156787	0.0028162	0.0094514	361	361
C15orf21	0.371829	2.79826e-13	1.19844e-11	361	361
C15orf23	1	1e-62	1e-58	361	361
C15orf26	0.220289	2.41117e-05	0.00016294	361	269
C15orf27	0.135817	0.00977856	0.0265857	361	359
C15orf29	0.26952	1.99665e-07	2.50398e-06	361	361
C15orf38	0.25421	9.88777e-07	1.01294e-05	361	361
C15orf39	0.137347	0.00897691	0.0248142	361	361
C15orf41	0.227719	1.24711e-05	9.18159e-05	361	361
C15orf42	0.647484	2.8134e-44	1.7509e-41	361	361
C15orf43	-0.300176	5.94527e-09	1.13085e-07	361	222
C15orf44	0.123487	0.0189195	0.0461574	361	361
C15orf48	0.302261	4.60929e-09	9.02595e-08	361	357
C15orf50	0.146014	0.00544335	0.0163383	361	157
C15orf56	0.209678	5.95014e-05	0.000354251	361	173
C15orf59	-0.127306	0.0155085	0.0390211	361	331
C15orf60	0.207808	6.94484e-05	0.00040571	361	61
C15orf62	0.218847	2.7333e-05	0.000181564	361	361
C16orf11	0.196189	0.000176008	0.000896697	361	56
C16orf46	-0.136247	0.00954729	0.0260779	361	361
C16orf52	-0.157332	0.00272092	0.00917803	361	361
C16orf53	0.213381	4.36316e-05	0.000272475	361	361
C16orf59	0.542932	4.5846e-29	5.50014e-27	361	361
C16orf5	-0.142506	0.00668631	0.0193299	361	361
C16orf62	-0.155794	0.00299778	0.00996508	361	361
C16orf70	-0.160719	0.00219119	0.00766999	361	361
C16orf72	-0.194982	0.000193271	0.00096952	361	361
C16orf73	0.126545	0.0161421	0.0403704	361	233
C16orf75	0.501048	2.42671e-24	2.38069e-22	361	361
C16orf79	0.226629	1.37559e-05	0.000100055	361	360
C16orf80	-0.126577	0.0161143	0.0403212	361	361
C16orf86	-0.175174	0.000829851	0.00337069	361	361
C16orf93	0.253137	1.1019e-06	1.1128e-05	361	359
C17orf102	-0.136203	0.00957093	0.0261246	361	77
C17orf103	-0.310499	1.65304e-09	3.57052e-08	361	361
C17orf104	0.14024	0.00761878	0.0215943	361	357
C17orf108	-0.200071	0.000129749	0.000692561	361	361
C17orf42	0.247531	1.92571e-06	1.79796e-05	361	361
C17orf44	-0.236502	5.55751e-06	4.54343e-05	361	361
C17orf46	0.151979	0.00379868	0.0120983	361	228
C17orf47	0.136877	0.00921651	0.0253518	361	323
C17orf48	-0.26194	4.46418e-07	5.07743e-06	361	361
C17orf53	0.641782	2.71432e-43	1.38604e-40	361	361
C17orf56	0.247586	1.91533e-06	1.78995e-05	361	361
C17orf57	0.134869	0.0103068	0.0277642	361	356
C17orf58	0.193497	0.000216698	0.00107032	361	361
C17orf61	-0.187945	0.000329896	0.00153466	361	361
C17orf63	0.252916	1.12672e-06	1.13499e-05	361	361
C17orf69	0.215988	3.49606e-05	0.000225612	361	353
C17orf71	0.163371	0.00184424	0.00665364	361	361
C17orf73	0.159358	0.0023916	0.00824739	361	117
C17orf75	0.272168	1.49853e-07	1.9595e-06	361	361
C17orf76	0.144375	0.00599556	0.0176447	361	359
C17orf77	0.148049	0.00482137	0.0147697	361	17
C17orf78	0.16459	0.00170225	0.0062134	361	103
C17orf79	0.136405	0.00946332	0.0258877	361	361
C17orf80	0.311904	1.38341e-09	3.04426e-08	361	361
C17orf86	0.220469	2.37352e-05	0.000161107	361	361
C17orf91	-0.261558	4.64593e-07	5.24511e-06	361	361
C17orf95	0.125746	0.0168307	0.0418405	361	361
C17orf97	-0.275572	1.03148e-07	1.42149e-06	361	361
C17orf99	0.160165	0.0022709	0.00791198	361	165
C18orf10	0.414544	2.00332e-16	1.21265e-14	361	361
C18orf16	0.14459	0.00592029	0.0174774	361	233
C18orf21	0.190669	0.000268827	0.00128949	361	361
C18orf25	0.167469	0.00140584	0.00526759	361	361
C18orf2	0.247627	1.90757e-06	1.78353e-05	361	272
C18orf45	0.323521	3.06051e-10	7.82356e-09	361	361
C18orf54	0.484509	1.19615e-22	1.05404e-20	361	360
C18orf55	0.191337	0.000255556	0.00123709	361	361
C18orf56	0.128041	0.0149177	0.037769	361	361
C18orf8	0.132493	0.0117435	0.0310217	361	361
C19orf21	0.144332	0.00601061	0.0176836	361	297
C19orf24	-0.13955	0.00792472	0.0223352	361	361
C19orf26	0.198402	0.00014803	0.000776409	361	323
C19orf29	0.177542	0.000702625	0.00292003	361	361
C19orf30	0.165894	0.00156158	0.00577186	361	45
C19orf39	-0.181944	0.000512795	0.00223415	361	361
C19orf40	0.493483	1.48156e-23	1.38523e-21	361	361
C19orf41	0.172064	0.00102929	0.00405024	361	15
C19orf42	-0.137537	0.00888153	0.0246174	361	361
C19orf46	0.165702	0.0015816	0.00583289	361	359
C19orf47	0.33171	1.01586e-10	2.91093e-09	361	361
C19orf48	0.202354	0.00010816	0.000592408	361	361
C19orf50	0.166469	0.00150296	0.00558629	361	361
C19orf54	0.156916	0.00279343	0.00938605	361	361
C19orf55	0.213754	4.22801e-05	0.000265534	361	361
C19orf56	-0.145337	0.00566557	0.0168882	361	361
C19orf57	0.227269	1.29869e-05	9.51914e-05	361	361
C19orf61	0.173053	0.000961543	0.00383059	361	361
C19orf66	-0.132435	0.0117812	0.0311087	361	361
C19orf69	0.156059	0.00294837	0.00982215	361	177
C19orf70	-0.187831	0.000332714	0.00154596	361	361
C19orf73	-0.128718	0.014391	0.0366492	361	361
C19orf77	0.133438	0.0111524	0.0297085	361	339
C1D	-0.185429	0.000397568	0.00179904	361	361
C1GALT1C1	-0.210936	5.35834e-05	0.000324252	361	361
C1GALT1	0.189698	0.00028927	0.00137228	361	361
C1QL1	0.256313	7.98421e-07	8.38194e-06	361	351
C1QL4	0.234484	6.71035e-06	5.37341e-05	361	275
C1QTNF1	-0.1736	0.000925868	0.00370648	361	361
C1QTNF3	-0.190461	0.000273078	0.00130729	361	361
C1QTNF7	-0.17302	0.000963715	0.00383578	361	344
C1QTNF9	-0.222864	1.9234e-05	0.000134073	361	305
C1RL	-0.239844	4.05246e-06	3.44776e-05	361	361
C1R	-0.235941	5.85764e-06	4.76143e-05	361	361
C1S	-0.23908	4.35785e-06	3.68052e-05	361	361
C1orf101	-0.221669	2.13684e-05	0.000147402	361	356
C1orf103	0.158826	0.00247429	0.00847386	361	361
C1orf104	0.276103	9.72674e-08	1.35271e-06	361	361
C1orf106	0.351298	6.34124e-12	2.26725e-10	361	357
C1orf107	-0.150745	0.00409646	0.0128799	361	361
C1orf109	0.18996	0.000283614	0.00134834	361	361
C1orf112	0.150231	0.00422652	0.0132324	361	361
C1orf113	0.172016	0.00103271	0.00406129	361	361
C1orf114	0.246816	2.06578e-06	1.9126e-05	361	318
C1orf122	-0.186574	0.000365299	0.00167278	361	361
C1orf125	0.202624	0.00010584	0.000581304	361	246
C1orf131	0.172167	0.00102205	0.00402492	361	361
C1orf133	-0.215591	3.61659e-05	0.000232712	361	340
C1orf135	0.61249	1.50485e-38	3.61074e-36	361	361
C1orf144	0.154989	0.00315282	0.0103972	361	361
C1orf150	0.140947	0.00731588	0.0208524	361	149
C1orf158	0.215578	3.62065e-05	0.000232898	361	85
C1orf159	0.292251	1.53602e-08	2.60783e-07	361	361
C1orf163	0.151839	0.0038314	0.0121869	361	361
C1orf172	0.181225	0.000540141	0.00233693	361	354
C1orf174	0.266049	2.89508e-07	3.47742e-06	361	361
C1orf175	0.155724	0.00301107	0.00999589	361	357
C1orf183	0.124195	0.018242	0.0448062	361	361
C1orf201	0.192364	0.000236336	0.00115246	361	361
C1orf212	-0.154578	0.00323464	0.0106055	361	361
C1orf213	0.181923	0.000513574	0.00223657	361	361
C1orf220	0.252332	1.19484e-06	1.19036e-05	361	352
C1orf229	0.138554	0.0083861	0.0234399	361	336
C1orf50	-0.190812	0.000265933	0.00127708	361	361
C1orf52	0.254563	9.53978e-07	9.82341e-06	361	361
C1orf53	-0.222756	1.94188e-05	0.000135077	361	361
C1orf57	-0.142712	0.00660675	0.0191658	361	361
C1orf63	0.133001	0.0114222	0.0302727	361	361
C1orf64	-0.183993	0.000441774	0.00196778	361	222
C1orf65	0.261838	4.51225e-07	5.12032e-06	361	154
C1orf69	-0.238844	4.45627e-06	3.75091e-05	361	361
C1orf77	0.244148	2.67976e-06	2.40177e-05	361	361
C1orf83	0.249973	1.51244e-06	1.46215e-05	361	361
C1orf84	0.340744	2.89543e-11	9.24079e-10	361	358
C1orf88	0.213983	4.14655e-05	0.00026121	361	297
C1orf89	-0.185933	0.000383053	0.00174405	361	361
C1orf91	0.187331	0.000345337	0.00159272	361	361
C1orf93	0.182249	0.000501598	0.00219331	361	361
C1orf95	-0.156955	0.00278646	0.00936422	361	320
C1orf96	0.393951	7.49691e-15	3.94976e-13	361	361
C1orf9	0.154968	0.00315681	0.0104057	361	361
C20orf108	-0.294422	1.18775e-08	2.07129e-07	361	361
C20orf112	0.144415	0.0059816	0.0176166	361	361
C20orf117	0.263202	3.91146e-07	4.51313e-06	361	361
C20orf118	0.269501	2.00062e-07	2.50739e-06	361	360
C20orf11	0.210598	5.51149e-05	0.000331906	361	361
C20orf132	-0.159036	0.00244145	0.00839024	361	361
C20orf144	0.156811	0.0028119	0.00943979	361	73
C20orf160	-0.304317	3.57924e-09	7.19279e-08	361	361
C20orf165	0.161376	0.00210014	0.00741696	361	359
C20orf166	0.156821	0.0028101	0.00943569	361	12
C20orf191	0.169216	0.00124987	0.0047675	361	62
C20orf20	0.232946	7.73815e-06	6.06475e-05	361	361
C20orf27	0.205177	8.61193e-05	0.000487096	361	361
C20orf43	0.180175	0.000582463	0.00248867	361	361
C20orf70	0.183146	0.000469949	0.0020761	361	132
C20orf72	0.435338	3.97764e-18	2.73154e-16	361	361
C20orf85	0.142754	0.00659071	0.0191305	361	8
C20orf96	0.293846	1.27187e-08	2.19873e-07	361	361
C21orf121	-0.208035	6.81614e-05	0.000399128	361	163
C21orf129	0.180533	0.000567715	0.0024366	361	296
C21orf131	0.154234	0.00330458	0.0108022	361	4
C21orf33	-0.20523	8.57501e-05	0.000485284	361	361
C21orf45	0.509113	3.35482e-25	3.42621e-23	361	361
C21orf49	-0.174832	0.000849855	0.00344281	361	353
C21orf56	0.241656	3.40795e-06	2.96373e-05	361	360
C21orf58	0.557713	6.76701e-31	8.92483e-29	361	361
C21orf59	0.280692	5.82517e-08	8.55518e-07	361	361
C21orf63	-0.205758	8.21437e-05	0.000467665	361	361
C21orf67	-0.128066	0.0148981	0.0377283	361	361
C21orf7	-0.16802	0.00135478	0.00510895	361	361
C21orf81	0.226154	1.43555e-05	0.000103938	361	145
C21orf91	0.162009	0.00201563	0.00716681	361	361
C21orf99	0.292667	1.46239e-08	2.49344e-07	361	103
C22orf13	-0.179907	0.000593769	0.00252777	361	361
C22orf25	-0.229516	1.05968e-05	7.97862e-05	361	361
C22orf30	0.157756	0.00264874	0.00897104	361	361
C22orf43	0.164047	0.00176425	0.0064063	361	253
C2CD3	0.16411	0.00175692	0.00638718	361	361
C2orf14	0.14485	0.00583049	0.0172866	361	40
C2orf15	0.220106	2.44994e-05	0.000165112	361	356
C2orf18	0.137779	0.00876141	0.0243398	361	361
C2orf24	-0.153159	0.00353244	0.0113999	361	361
C2orf27A	0.190535	0.000271566	0.00130037	361	358
C2orf29	0.290521	1.88234e-08	3.14751e-07	361	361
C2orf34	0.127246	0.015558	0.0391163	361	361
C2orf40	-0.242462	3.15406e-06	2.76954e-05	361	297
C2orf42	-0.2267	1.36693e-05	9.9521e-05	361	361
C2orf43	0.122537	0.0198639	0.0480318	361	361
C2orf44	0.28408	3.96581e-08	6.09407e-07	361	361
C2orf47	-0.141133	0.00723802	0.0206601	361	361
C2orf48	0.508032	4.38728e-25	4.45779e-23	361	318
C2orf49	0.145401	0.00564435	0.0168299	361	361
C2orf50	0.153391	0.00348212	0.011274	361	184
C2orf51	0.193236	0.00022108	0.00108873	361	74
C2orf52	0.16067	0.0021982	0.00768965	361	319
C2orf55	-0.129275	0.0139698	0.0357595	361	361
C2orf58	-0.157572	0.00267977	0.00905457	361	339
C2orf60	0.144498	0.00595258	0.0175571	361	361
C2orf66	0.182247	0.000501659	0.00219331	361	130
C2orf68	0.275286	1.06454e-07	1.45807e-06	361	361
C2orf72	-0.14831	0.00474669	0.0145881	361	361
C2orf74	-0.214841	3.85519e-05	0.000245939	361	361
C2orf77	0.189952	0.000283792	0.00134863	361	361
C2orf7	-0.142348	0.00674773	0.0194755	361	361
C3P1	-0.149562	0.00440145	0.0137003	361	356
C3orf17	0.193834	0.000211163	0.00104584	361	361
C3orf18	0.127812	0.0150993	0.0381845	361	361
C3orf21	0.185782	0.000387343	0.00176066	361	361
C3orf26	0.358629	2.13478e-12	8.11337e-11	361	361
C3orf34	0.32113	4.19682e-10	1.04475e-08	361	361
C3orf35	0.263937	3.62014e-07	4.23093e-06	361	356
C3orf36	-0.22149	2.17056e-05	0.000149418	361	295
C3orf37	0.190867	0.00026482	0.00127235	361	361
C3orf38	0.175435	0.000814833	0.00331985	361	361
C3orf39	0.297586	8.13342e-09	1.48195e-07	361	361
C3orf43	0.13235	0.0118353	0.0312351	361	99
C3orf45	-0.132038	0.0120379	0.0316648	361	287
C3orf50	0.255047	9.08272e-07	9.40137e-06	361	158
C3orf52	0.213288	4.39765e-05	0.00027441	361	320
C3orf54	-0.159809	0.00232345	0.00805424	361	361
C3orf55	0.202428	0.000107516	0.000589372	361	160
C3orf57	0.176879	0.000736264	0.00304142	361	325
C3orf62	0.206017	8.04283e-05	0.000459211	361	361
C3orf63	0.264682	3.34666e-07	3.94838e-06	361	361
C3orf65	0.162038	0.00201177	0.00715948	361	234
C3orf67	0.149512	0.00441479	0.0137333	361	356
C3orf71	0.188368	0.000319632	0.00149494	361	361
C3orf72	0.188506	0.000316341	0.00148199	361	97
C3orf74	0.145779	0.0055197	0.0165176	361	53
C3	-0.220582	2.35016e-05	0.000159739	361	361
C4A	-0.257932	6.76362e-07	7.28065e-06	361	361
C4BPA	-0.328025	1.67553e-10	4.54608e-09	361	361
C4BPB	-0.239701	4.10799e-06	3.49319e-05	361	361
C4orf21	0.505815	7.58237e-25	7.62641e-23	361	361
C4orf26	0.140503	0.00750461	0.021308	361	85
C4orf27	0.17023	0.00116673	0.00450124	361	361
C4orf31	-0.141848	0.00694582	0.0199403	361	256
C4orf34	-0.135653	0.00986868	0.0267759	361	361
C4orf39	0.246427	2.14609e-06	1.97868e-05	361	232
C4orf3	-0.327302	1.84688e-10	4.95029e-09	361	361
C4orf40	-0.180717	0.000560255	0.00241191	361	101
C4orf43	0.13256	0.0117007	0.0309289	361	361
C4orf46	0.489668	3.6276e-23	3.26895e-21	361	361
C5orf13	0.261726	4.56532e-07	5.16876e-06	361	361
C5orf22	0.341147	2.73529e-11	8.80019e-10	361	361
C5orf23	-0.17444	0.000873371	0.00352517	361	360
C5orf25	0.133722	0.0109801	0.0293121	361	361
C5orf30	0.257687	6.93599e-07	7.43436e-06	361	361
C5orf33	-0.27326	1.32999e-07	1.76344e-06	361	361
C5orf34	0.59525	5.55951e-36	1.06459e-33	361	361
C5orf36	-0.204935	8.78272e-05	0.000494966	361	358
C5orf39	0.159224	0.00241219	0.00830258	361	361
C5orf42	0.146383	0.00532554	0.0160427	361	361
C5orf43	0.210816	5.41237e-05	0.000326827	361	361
C5orf47	0.153459	0.00346737	0.0112372	361	247
C5orf4	-0.231436	8.89263e-06	6.84035e-05	361	361
C5orf51	0.226486	1.39342e-05	0.000101167	361	361
C5orf53	-0.28255	4.72091e-08	7.09562e-07	361	361
C5orf54	0.340917	2.82546e-11	9.04647e-10	361	361
C5orf55	-0.142109	0.00684194	0.0196989	361	361
C5orf58	0.359033	2.00893e-12	7.64967e-11	361	301
C5	-0.154053	0.00334194	0.0109017	361	361
C6orf103	0.144238	0.00604401	0.017761	361	50
C6orf105	0.166848	0.00146543	0.00546211	361	333
C6orf126	0.196987	0.000165385	0.00085019	361	77
C6orf127	0.157607	0.00267381	0.0090392	361	16
C6orf132	0.127264	0.0155431	0.0390885	361	305
C6orf134	0.248264	1.79148e-06	1.69247e-05	361	361
C6orf138	-0.266861	2.65538e-07	3.23041e-06	361	339
C6orf141	0.203179	0.000101223	0.000558875	361	323
C6orf145	-0.210448	5.58095e-05	0.000335886	361	361
C6orf147	0.343271	2.02331e-11	6.68228e-10	361	170
C6orf150	0.198385	0.00014823	0.000777249	361	352
C6orf153	0.162324	0.00197479	0.00705179	361	361
C6orf154	-0.1525	0.00367884	0.0117827	361	351
C6orf162	0.206638	7.64475e-05	0.000440907	361	361
C6orf163	0.204144	9.364e-05	0.000521925	361	331
C6orf167	0.5372	2.22465e-28	2.57581e-26	361	361
C6orf182	0.364806	8.34574e-13	3.36448e-11	361	361
C6orf192	0.246022	2.23282e-06	2.04632e-05	361	361
C6orf195	0.154327	0.00328548	0.0107492	361	120
C6orf203	-0.124532	0.0179271	0.0441036	361	361
C6orf208	-0.178105	0.000675125	0.0028252	361	357
C6orf217	-0.176745	0.000743275	0.00306593	361	243
C6orf218	0.136605	0.0093579	0.0256627	361	77
C6orf221	0.128335	0.0146866	0.0372972	361	19
C6orf223	0.223863	1.76067e-05	0.000124252	361	301
C6orf226	-0.132045	0.0120337	0.031658	361	361
C6orf26	0.215187	3.74349e-05	0.000239716	361	361
C6orf27	0.132288	0.0118758	0.0313211	361	360
C6orf48	0.136835	0.00923844	0.0253981	361	361
C6orf59	0.129837	0.0135561	0.0349205	361	228
C6orf64	0.124087	0.0183438	0.0450063	361	361
C6orf89	-0.149864	0.00432179	0.0134859	361	361
C6orf94	0.239978	4.00127e-06	3.40827e-05	361	70
C6	-0.351037	6.58856e-12	2.34306e-10	361	361
C7orf10	-0.168317	0.00132801	0.0050223	361	361
C7orf23	0.298415	7.35975e-09	1.35462e-07	361	361
C7orf28A	0.169475	0.00122811	0.00469528	361	361
C7orf29	0.284341	3.84948e-08	5.95667e-07	361	361
C7orf31	0.207682	7.01689e-05	0.000409439	361	361
C7orf36	0.361439	1.39607e-12	5.41427e-11	361	361
C7orf41	-0.134695	0.0104064	0.0280097	361	361
C7orf42	-0.152734	0.00362635	0.0116444	361	361
C7orf44	0.234816	6.50616e-06	5.22882e-05	361	361
C7orf46	0.129518	0.01379	0.0353994	361	361
C7orf47	0.131137	0.0126404	0.0329538	361	361
C7orf49	0.174514	0.000868917	0.00351004	361	361
C7orf54	0.140238	0.00761955	0.0215943	361	253
C7orf55	-0.150655	0.00411896	0.0129404	361	361
C7orf57	0.128483	0.0145722	0.0370397	361	115
C7orf58	-0.192038	0.000242271	0.00117909	361	361
C7orf60	0.246183	2.19805e-06	2.01817e-05	361	361
C7orf68	0.25341	1.07199e-06	1.0856e-05	361	361
C7orf69	0.156674	0.00283637	0.00950949	361	90
C7orf70	0.171503	0.00106969	0.00418771	361	361
C7orf71	0.216798	3.26144e-05	0.000212329	361	97
C7	-0.306873	2.60621e-09	5.40653e-08	361	360
C8A	-0.257868	6.80855e-07	7.30955e-06	361	360
C8B	-0.202569	0.000106315	0.00058375	361	360
C8G	-0.26032	5.28509e-07	5.88377e-06	361	361
C8ORFK29	0.217995	2.94213e-05	0.000193822	361	347
C8orf38	0.129301	0.0139511	0.035724	361	361
C8orf39	0.179354	0.000617705	0.00261625	361	346
C8orf40	-0.123916	0.0185063	0.045291	361	361
C8orf42	-0.203883	9.56415e-05	0.000531742	361	361
C8orf44	0.186937	0.00035559	0.00163314	361	361
C8orf47	0.29005	1.98901e-08	3.31197e-07	361	354
C8orf48	0.164648	0.00169574	0.00619417	361	339
C8orf51	0.144466	0.00596352	0.0175816	361	361
C8orf55	-0.138949	0.00820033	0.0230013	361	361
C8orf58	-0.178797	0.000642751	0.00270908	361	361
C8orf71	0.157266	0.00273223	0.00920683	361	6
C8orf77	0.23945	4.20723e-06	3.56844e-05	361	354
C8orf79	-0.17187	0.00104311	0.00409733	361	353
C8orf80	-0.151245	0.00397318	0.0125437	361	360
C9orf100	0.588574	4.99117e-35	9.03629e-33	361	361
C9orf103	-0.216444	3.36212e-05	0.000217745	361	361
C9orf109	0.260096	5.4091e-07	5.97461e-06	361	323
C9orf110	0.270612	1.77435e-07	2.26224e-06	361	340
C9orf117	0.211988	4.90659e-05	0.00030131	361	345
C9orf130	-0.137802	0.0087498	0.0243165	361	361
C9orf140	0.448173	3.08215e-19	2.21592e-17	361	361
C9orf163	0.198173	0.000150724	0.000786602	361	359
C9orf172	0.177854	0.000687251	0.0028669	361	347
C9orf25	0.257023	7.42531e-07	7.88247e-06	361	361
C9orf30	0.22069	2.32807e-05	0.000158367	361	361
C9orf40	0.235048	6.36693e-06	5.12934e-05	361	361
C9orf45	0.265194	3.17019e-07	3.76696e-06	361	361
C9orf53	0.300111	5.99258e-09	1.13659e-07	361	207
C9orf57	0.136942	0.00918317	0.0252845	361	212
C9orf5	-0.221078	2.25041e-05	0.000153851	361	361
C9orf64	0.25333	1.08063e-06	1.09353e-05	361	361
C9orf69	0.12669	0.0160191	0.040098	361	361
C9orf71	-0.274744	1.13008e-07	1.53517e-06	361	160
C9orf79	0.173045	0.000962036	0.00383179	361	63
C9orf80	0.21804	2.93093e-05	0.000193276	361	361
C9orf82	-0.131045	0.0127035	0.0330792	361	361
C9orf84	0.20505	8.70165e-05	0.000491333	361	225
C9orf86	0.200584	0.000124572	0.000668153	361	361
C9orf91	-0.152018	0.00378959	0.0120806	361	361
C9orf95	-0.216322	3.39754e-05	0.000219881	361	361
C9orf9	-0.152832	0.00360448	0.0115854	361	361
CA10	0.135977	0.00969184	0.0264132	361	155
CA12	0.154398	0.00327119	0.0107042	361	359
CA13	0.143147	0.00644159	0.0187578	361	361
CA14	-0.170442	0.00115006	0.00444556	361	360
CA2	-0.146362	0.00533202	0.0160573	361	361
CA4	-0.217586	3.04785e-05	0.000199796	361	303
CA5A	-0.185644	0.000391323	0.00177643	361	348
CA5BP	0.294984	1.1109e-08	1.95265e-07	361	361
CA5B	-0.179851	0.00059614	0.00253624	361	361
CA9	0.220828	2.30024e-05	0.000156828	361	295
CABC1	-0.33775	4.40904e-11	1.36557e-09	361	361
CABIN1	0.177965	0.000681899	0.00284935	361	361
CABLES2	0.332066	9.6764e-11	2.78476e-09	361	361
CABP4	0.164062	0.00176245	0.00640146	361	350
CABP7	0.198182	0.000150616	0.000786377	361	358
CACNA1C	-0.128502	0.0145574	0.0370162	361	361
CACNA1D	0.215549	3.62964e-05	0.000233251	361	358
CACNA1I	-0.178832	0.000641139	0.00270317	361	297
CACNA2D3	-0.298564	7.22875e-09	1.3335e-07	361	325
CACNB1	0.273253	1.33108e-07	1.7637e-06	361	361
CACNB2	0.135095	0.010179	0.0274831	361	361
CACNB4	-0.222332	2.01579e-05	0.00013973	361	354
CACNG6	0.145887	0.00548457	0.0164372	361	74
CACNG7	0.155674	0.00302047	0.0100171	361	33
CACYBP	0.294928	1.11821e-08	1.96378e-07	361	361
CADM1	-0.142087	0.00685075	0.01971	361	361
CADM2	0.168138	0.00134412	0.00507714	361	202
CAD	0.214849	3.85285e-05	0.000245939	361	361
CAGE1	0.125041	0.0174603	0.0431364	361	173
CALB1	0.284897	3.61181e-08	5.62386e-07	361	205
CALCRL	-0.174011	0.000899823	0.00361874	361	361
CALCR	0.282404	4.79991e-08	7.20348e-07	361	239
CALD1	-0.187629	0.000337751	0.00156384	361	361
CALHM2	-0.17276	0.000981185	0.00388862	361	361
CALML6	0.125736	0.0168395	0.0418519	361	316
CALU	0.214269	4.04738e-05	0.000255884	361	361
CAMK1D	-0.258473	6.39743e-07	6.92041e-06	361	360
CAMK2B	-0.250901	1.37889e-06	1.35274e-05	361	345
CAMKV	0.172572	0.000993944	0.00393214	361	146
CAMSAP1	0.138572	0.00837734	0.023422	361	361
CAMTA2	-0.253694	1.04168e-06	1.06005e-05	361	361
CAND1	0.158895	0.00246353	0.0084501	361	361
CANT1	0.153678	0.00342068	0.0111294	361	361
CAP1	0.154218	0.00330799	0.0108086	361	361
CAPG	0.19532	0.000188289	0.000950033	361	361
CAPN10	0.27343	1.30556e-07	1.73567e-06	361	361
CAPN11	-0.131987	0.0120717	0.0317329	361	357
CAPN12	0.223615	1.79991e-05	0.000126572	361	361
CAPN9	0.136791	0.00926116	0.0254394	361	214
CAPRIN1	0.183615	0.000454147	0.00201613	361	361
CAPZA1	0.233306	7.48473e-06	5.88931e-05	361	361
CARD14	0.14612	0.00540931	0.0162476	361	357
CARD17	0.126356	0.0163027	0.04067	361	70
CARD18	0.333209	8.27175e-11	2.40836e-09	361	135
CARKD	-0.219689	2.54046e-05	0.00017029	361	361
CASC3	0.144041	0.00611414	0.0179385	361	361
CASC5	0.448479	2.89608e-19	2.08969e-17	361	361
CASKIN1	0.133414	0.0111669	0.0297363	361	276
CASP12	-0.162704	0.00192645	0.00690146	361	291
CASP2	0.366426	6.50154e-13	2.66416e-11	361	361
CASP3	0.237516	5.05211e-06	4.18348e-05	361	361
CASP5	0.217287	3.12735e-05	0.000204402	361	232
CASP7	0.228091	1.20583e-05	8.91722e-05	361	361
CASP8AP2	0.284117	3.94933e-08	6.07343e-07	361	361
CASP8	0.262399	4.2552e-07	4.86745e-06	361	361
CASQ2	-0.195213	0.000189848	0.000956317	361	352
CASS4	-0.199415	0.000136673	0.000724859	361	356
CASZ1	0.134401	0.0105767	0.0283884	361	361
CATSPER1	0.168611	0.00130192	0.00493672	361	254
CATSPER2	0.165318	0.00162232	0.00596209	361	361
CAT	-0.156263	0.00291073	0.00971625	361	361
CBARA1	-0.200562	0.000124792	0.000669151	361	361
CBFA2T2	0.385973	2.85448e-14	1.40055e-12	361	361
CBFA2T3	-0.303988	3.72777e-09	7.46116e-08	361	361
CBFB	0.209067	6.25927e-05	0.000370661	361	361
CBLL1	0.127205	0.0155909	0.0391889	361	361
CBLN1	-0.161666	0.00206101	0.00729948	361	347
CBLN4	-0.317622	6.63757e-10	1.5793e-08	361	297
CBL	0.156605	0.0028487	0.00954435	361	361
CBR1	-0.169565	0.00122066	0.00467051	361	361
CBR3	0.17055	0.00114166	0.00442402	361	361
CBR4	-0.273683	1.2698e-07	1.70171e-06	361	361
CBWD1	0.194895	0.000194574	0.000975321	361	361
CBWD6	0.158956	0.00245381	0.00842981	361	361
CBX1	0.449067	2.56876e-19	1.87388e-17	361	361
CBX2	0.251158	1.34398e-06	1.32174e-05	361	361
CBX3	0.232557	8.02113e-06	6.25209e-05	361	361
CBX4	0.129022	0.0141603	0.0361449	361	361
CBX7	-0.237399	5.10837e-06	4.2214e-05	361	361
CBX8	0.145246	0.00569613	0.0169564	361	361
CC2D1A	-0.141085	0.00725834	0.0207121	361	361
CC2D1B	0.232621	7.97367e-06	6.21996e-05	361	361
CCAR1	0.213001	4.5054e-05	0.000280391	361	361
CCBL1	0.140081	0.00768836	0.0217491	361	361
CCBL2	-0.186197	0.000375638	0.00171579	361	361
CCBP2	-0.178295	0.000666118	0.0027925	361	361
CCDC109B	0.243541	2.84224e-06	2.52806e-05	361	360
CCDC112	0.295813	1.00616e-08	1.79549e-07	361	360
CCDC120	0.152233	0.00373989	0.0119397	361	361
CCDC123	0.226123	1.43953e-05	0.000104135	361	361
CCDC129	0.133965	0.0108342	0.028973	361	38
CCDC134	0.273613	1.27957e-07	1.7091e-06	361	361
CCDC137	0.263878	3.64268e-07	4.24731e-06	361	361
CCDC138	0.333317	8.14958e-11	2.38324e-09	361	360
CCDC13	0.185016	0.000409845	0.0018437	361	358
CCDC141	0.13039	0.01316	0.0341029	361	312
CCDC142	0.255055	9.07541e-07	9.39869e-06	361	361
CCDC144C	0.151768	0.00384819	0.0122278	361	120
CCDC144NL	0.280612	5.87816e-08	8.6203e-07	361	96
CCDC146	-0.287818	2.57921e-08	4.16923e-07	361	361
CCDC149	0.123797	0.0186206	0.0455286	361	361
CCDC14	0.388156	1.98722e-14	1.00057e-12	361	361
CCDC150	0.322835	3.35142e-10	8.50236e-09	361	361
CCDC151	0.138425	0.00844763	0.0235887	361	355
CCDC152	-0.199005	0.000141169	0.000745331	361	361
CCDC155	0.209399	6.08961e-05	0.000361582	361	183
CCDC159	-0.21411	4.10211e-05	0.000258687	361	361
CCDC15	0.152628	0.00364995	0.0117032	361	361
CCDC163P	0.386194	2.75232e-14	1.35674e-12	361	342
CCDC18	0.42504	2.86611e-17	1.84125e-15	361	361
CCDC19	0.265931	2.93178e-07	3.51302e-06	361	341
CCDC21	0.32832	1.61015e-10	4.39263e-09	361	361
CCDC24	0.154647	0.0032207	0.0105633	361	361
CCDC28A	-0.160828	0.0021759	0.00762772	361	361
CCDC28B	0.202309	0.000108547	0.000594204	361	361
CCDC34	0.308393	2.15512e-09	4.55619e-08	361	361
CCDC36	0.148007	0.00483369	0.0147983	361	314
CCDC37	0.143305	0.00638282	0.0186111	361	136
CCDC39	0.169853	0.00119706	0.00459158	361	335
CCDC3	-0.253529	1.05914e-06	1.07617e-05	361	361
CCDC40	0.144421	0.00597952	0.0176131	361	360
CCDC41	0.345099	1.55795e-11	5.25876e-10	361	361
CCDC43	0.309895	1.78412e-09	3.82463e-08	361	361
CCDC45	0.315715	8.49476e-10	1.97401e-08	361	361
CCDC48	-0.300039	6.04537e-09	1.14443e-07	361	361
CCDC50	0.142505	0.00668662	0.0193299	361	361
CCDC52	0.26864	2.19491e-07	2.71501e-06	361	361
CCDC53	-0.122157	0.0202531	0.0488364	361	361
CCDC58	0.229862	1.02688e-05	7.76104e-05	361	361
CCDC59	0.271807	1.55861e-07	2.02081e-06	361	361
CCDC64	0.301172	5.26645e-09	1.01629e-07	361	361
CCDC66	0.331754	1.00973e-10	2.89751e-09	361	361
CCDC67	0.185041	0.000409069	0.00184063	361	136
CCDC6	0.154816	0.00318707	0.0104733	361	361
CCDC72	0.1674	0.00141232	0.00528891	361	361
CCDC74A	0.162892	0.00190296	0.00683454	361	353
CCDC74B	0.211926	4.93199e-05	0.000302531	361	305
CCDC75	0.123942	0.0184822	0.0452568	361	360
CCDC76	0.169077	0.00126165	0.00480668	361	361
CCDC77	0.333187	8.29745e-11	2.41232e-09	361	361
CCDC78	0.148799	0.00460893	0.0142305	361	350
CCDC82	0.145347	0.00566214	0.0168805	361	361
CCDC84	0.31077	1.59749e-09	3.46937e-08	361	361
CCDC85A	-0.214419	3.99602e-05	0.0002532	361	359
CCDC86	0.177882	0.000685912	0.00286312	361	361
CCDC88A	0.361221	1.44308e-12	5.57884e-11	361	361
CCDC88C	0.130747	0.0129095	0.0335423	361	361
CCDC93	0.17349	0.000932938	0.00373082	361	361
CCDC97	0.196724	0.000168815	0.000864254	361	361
CCDC99	0.6588	2.70365e-46	3.16725e-43	361	361
CCHCR1	0.239163	4.32334e-06	3.65602e-05	361	361
CCKAR	0.161838	0.00203812	0.00723385	361	7
CCKBR	0.12355	0.0188582	0.0460135	361	90
CCL14	-0.408387	6.07494e-16	3.51693e-14	361	361
CCL16	-0.222953	1.90834e-05	0.00013321	361	356
CCL20	0.183113	0.000471063	0.00207963	361	357
CCL21	-0.141378	0.00713674	0.0204031	361	358
CCL23	-0.182078	0.000507832	0.00221787	361	301
CCL24	-0.135432	0.0099905	0.0270548	361	240
CCL25	0.187617	0.000338053	0.0015642	361	322
CCL27	0.181622	0.000524881	0.00227933	361	115
CCL2	-0.149325	0.00446493	0.0138546	361	361
CCM2	-0.185314	0.000400948	0.00181024	361	361
CCNA2	0.64229	2.22224e-43	1.16463e-40	361	361
CCNB1	0.650178	9.4807e-45	6.51063e-42	361	361
CCNB2	0.647593	2.69277e-44	1.72989e-41	361	361
CCNC	0.171468	0.00107222	0.00419513	361	361
CCND1	-0.266454	2.77295e-07	3.35908e-06	361	361
CCNE1	0.358001	2.34605e-12	8.81539e-11	361	361
CCNE2	0.489457	3.81071e-23	3.41848e-21	361	361
CCNF	0.57253	7.96129e-33	1.2103e-30	361	361
CCNI2	0.213963	4.15365e-05	0.00026146	361	323
CCNK	0.274802	1.12293e-07	1.52754e-06	361	361
CCNL1	0.196857	0.000167072	0.000857135	361	361
CCNL2	0.152679	0.00363863	0.011675	361	361
CCNYL1	0.282089	4.97458e-08	7.42088e-07	361	361
CCR10	0.210147	5.72279e-05	0.000343075	361	355
CCR6	0.128103	0.0148688	0.0376781	361	360
CCR8	0.184977	0.000411009	0.0018481	361	247
CCS	-0.257161	7.32052e-07	7.78783e-06	361	361
CCT2	0.285963	3.19583e-08	5.04719e-07	361	361
CCT5	0.381262	6.18117e-14	2.86942e-12	361	361
CCT6A	0.27749	8.33899e-08	1.18032e-06	361	361
CCT6B	-0.280837	5.73072e-08	8.44137e-07	361	359
CCT6P1	0.221686	2.13355e-05	0.000147227	361	361
CCT7	0.150441	0.00417297	0.0130894	361	361
CCT8	0.213048	4.48757e-05	0.000279369	361	361
CD101	0.123952	0.0184721	0.0452487	361	360
CD109	0.249908	1.52222e-06	1.46907e-05	361	361
CD14	-0.146727	0.00521775	0.0157776	361	361
CD164	0.1609	0.00216577	0.00760157	361	361
CD24	0.194992	0.000193119	0.000969002	361	361
CD276	0.196802	0.000167797	0.000859483	361	361
CD2AP	0.150256	0.00422009	0.0132164	361	361
CD2BP2	0.132386	0.011812	0.0311778	361	361
CD300LG	-0.298208	7.54632e-09	1.38639e-07	361	334
CD302	-0.189605	0.00029129	0.00137989	361	361
CD34	-0.243599	2.82628e-06	2.51611e-05	361	361
CD3D	0.132816	0.0115388	0.0305334	361	361
CD3EAP	0.260627	5.11938e-07	5.72444e-06	361	361
CD40	0.132113	0.0119889	0.0315652	361	361
CD55	-0.133777	0.010947	0.0292472	361	361
CD59	-0.248356	1.77523e-06	1.68031e-05	361	361
CD5L	-0.2147	3.90186e-05	0.00024834	361	352
CD70	0.131987	0.0120717	0.0317329	361	315
CD7	0.20313	0.000101627	0.000560796	361	361
CD81	-0.255159	8.98033e-07	9.31476e-06	361	361
CD93	-0.159037	0.00244128	0.00839024	361	361
CD99L2	-0.152326	0.00371861	0.0118881	361	361
CDADC1	-0.320451	4.58824e-10	1.13305e-08	361	361
CDAN1	0.331637	1.02599e-10	2.93151e-09	361	361
CDC123	0.170703	0.00112979	0.00438762	361	361
CDC14A	0.324804	2.58029e-10	6.70841e-09	361	361
CDC14B	-0.300114	5.9904e-09	1.13659e-07	361	361
CDC14C	-0.221051	2.2558e-05	0.000154117	361	340
CDC20	0.627859	5.64446e-41	2.04381e-38	361	361
CDC23	0.225162	1.56856e-05	0.000112326	361	361
CDC25A	0.5598	3.66901e-31	5.00468e-29	361	361
CDC25B	0.449761	2.22906e-19	1.64414e-17	361	361
CDC25C	0.630243	2.30683e-41	8.83471e-39	361	361
CDC27	0.225233	1.5587e-05	0.00011174	361	361
CDC37L1	-0.325714	2.28507e-10	6.01947e-09	361	361
CDC42BPA	-0.121978	0.0204384	0.0492178	361	361
CDC42BPG	0.22909	1.10154e-05	8.25014e-05	361	356
CDC42EP5	-0.168131	0.00134467	0.00507756	361	361
CDC42SE1	0.195086	0.000191728	0.00096382	361	361
CDC42	0.144411	0.00598282	0.0176176	361	361
CDC45	0.598989	1.59007e-36	3.23125e-34	361	361
CDC6	0.594786	6.48568e-36	1.23012e-33	361	361
CDC7	0.50418	1.13257e-24	1.12214e-22	361	361
CDCA2	0.605167	1.93769e-37	4.24057e-35	361	361
CDCA3	0.610065	3.53294e-38	8.27748e-36	361	361
CDCA4	0.50254	1.68949e-24	1.66565e-22	361	361
CDCA5	0.60615	1.38001e-37	3.08796e-35	361	361
CDCA7L	0.330433	1.20903e-10	3.37699e-09	361	361
CDCA7	0.298908	6.93445e-09	1.28803e-07	361	360
CDCA8	0.665558	1.53125e-47	2.54123e-44	361	361
CDCP1	0.19043	0.000273715	0.00130909	361	360
CDH10	0.235404	6.1591e-06	4.98004e-05	361	98
CDH12	0.325127	2.4715e-10	6.45931e-09	361	337
CDH13	-0.149885	0.00431624	0.0134722	361	361
CDH18	0.344815	1.62278e-11	5.45906e-10	361	71
CDH22	-0.308776	2.05409e-09	4.35646e-08	361	162
CDH23	-0.277905	7.96177e-08	1.13095e-06	361	361
CDH24	0.24526	2.40515e-06	2.18515e-05	361	361
CDH2	0.15657	0.00285497	0.00955896	361	361
CDH4	-0.128731	0.0143815	0.0366297	361	201
CDH5	-0.21361	4.27965e-05	0.00026827	361	361
CDH8	0.216054	3.47631e-05	0.000224483	361	237
CDH9	0.203809	9.62141e-05	0.000534776	361	99
CDHR4	0.173279	0.000946611	0.00377867	361	142
CDIPT	-0.130094	0.0133711	0.0345286	361	361
CDK11A	0.200374	0.00012667	0.000677215	361	361
CDK11B	0.196846	0.000167222	0.000857423	361	361
CDK12	0.151935	0.00380884	0.0121248	361	361
CDK16	0.338516	3.96111e-11	1.23839e-09	361	361
CDK19	0.200962	0.000120888	0.000652258	361	361
CDK1	0.643154	1.58026e-43	8.74191e-41	361	361
CDK20	0.128191	0.0147998	0.0375128	361	361
CDK2AP1	0.209669	5.95446e-05	0.000354402	361	361
CDK2	0.435166	4.11331e-18	2.79579e-16	361	361
CDK3	0.143545	0.00629416	0.0183984	361	361
CDK4	0.339261	3.56798e-11	1.12609e-09	361	361
CDK5R1	0.234398	6.76398e-06	5.40982e-05	361	361
CDK5R2	0.238901	4.4322e-06	3.73302e-05	361	96
CDK5RAP1	0.212872	4.55489e-05	0.000283028	361	361
CDK5RAP2	0.173205	0.000951458	0.00379541	361	361
CDK6	-0.295735	1.01562e-08	1.80912e-07	361	361
CDK7	0.139162	0.00810172	0.0227761	361	361
CDKAL1	0.297451	8.26688e-09	1.50486e-07	361	361
CDKL1	0.1265	0.0161796	0.0404237	361	337
CDKL2	0.134423	0.0105644	0.0283695	361	210
CDKN1B	0.154709	0.00320835	0.0105315	361	361
CDKN2AIPNL	0.230583	9.6147e-06	7.3419e-05	361	361
CDKN2A	0.356339	3.00883e-12	1.12211e-10	361	361
CDKN2BAS	0.405217	1.06602e-15	6.04839e-14	361	343
CDKN2B	0.156835	0.0028077	0.00942922	361	361
CDKN2C	0.410808	3.93805e-16	2.29989e-14	361	361
CDKN2D	0.340965	2.80654e-11	9.00037e-10	361	361
CDKN3	0.608715	5.66525e-38	1.3119e-35	361	361
CDNF	-0.33092	1.13159e-10	3.20109e-09	361	361
CDO1	-0.163868	0.00178506	0.00646823	361	361
CDR1	0.127474	0.0153717	0.0387356	361	126
CDR2	0.166906	0.00145977	0.00544304	361	361
CDRT15P	0.122671	0.0197282	0.0477501	361	331
CDT1	0.543413	4.0103e-29	4.86983e-27	361	361
CDV3	0.25669	7.68236e-07	8.09921e-06	361	361
CDX2	0.230354	9.81823e-06	7.47439e-05	361	181
CDYL2	-0.242611	3.10909e-06	2.73608e-05	361	357
CEACAM16	0.133531	0.0110956	0.0295888	361	165
CEACAM1	-0.15252	0.00367428	0.0117718	361	361
CEBPA	0.128196	0.0147959	0.0375077	361	361
CEBPD	-0.140754	0.00739754	0.021052	361	361
CEBPG	0.229065	1.104e-05	8.26236e-05	361	361
CECR5	-0.138786	0.00827647	0.0231855	361	361
CECR7	0.294087	1.23592e-08	2.14963e-07	361	225
CELA3A	0.166389	0.00151093	0.00561383	361	89
CELA3B	0.153281	0.00350576	0.011334	361	86
CELF1	0.127982	0.0149645	0.0378675	361	361
CELF3	0.12294	0.0194585	0.0472638	361	133
CELF4	0.260133	5.38848e-07	5.96023e-06	361	324
CELSR1	-0.142639	0.00663478	0.0192248	361	361
CELSR3	0.340763	2.88796e-11	9.23173e-10	361	361
CENPA	0.642438	2.09567e-43	1.12798e-40	361	360
CENPB	0.129887	0.0135199	0.0348361	361	361
CENPE	0.655977	8.77602e-46	7.9443e-43	361	361
CENPF	0.604207	2.69508e-37	5.70985e-35	361	361
CENPH	0.604496	2.44042e-37	5.2259e-35	361	361
CENPI	0.567083	4.18355e-32	5.99391e-30	361	352
CENPJ	0.522415	1.14075e-26	1.24143e-24	361	361
CENPK	0.610688	2.83992e-38	6.73299e-36	361	360
CENPL	0.588475	5.15543e-35	9.24959e-33	361	361
CENPM	0.553896	2.05128e-30	2.65268e-28	361	361
CENPN	0.259402	5.81233e-07	6.34956e-06	361	361
CENPO	0.511979	1.63956e-25	1.70952e-23	361	358
CENPP	0.26422	3.5137e-07	4.13077e-06	361	361
CENPQ	0.493298	1.54779e-23	1.44039e-21	361	361
CENPT	0.220913	2.28308e-05	0.000155764	361	361
CENPW	0.618896	1.5231e-39	4.15515e-37	361	361
CEP110	0.296279	9.51557e-09	1.70877e-07	361	361
CEP135	0.324211	2.79233e-10	7.20327e-09	361	361
CEP152	0.555578	1.26047e-30	1.64067e-28	361	361
CEP164	0.173459	0.000934904	0.00373718	361	361
CEP170	0.153664	0.00342358	0.0111352	361	361
CEP192	0.226152	1.43577e-05	0.000103938	361	361
CEP250	0.365469	7.5361e-13	3.05044e-11	361	361
CEP290	0.231409	8.9145e-06	6.85453e-05	361	361
CEP55	0.604956	2.08322e-37	4.50949e-35	361	361
CEP63	0.228492	1.16288e-05	8.65102e-05	361	361
CEP68	-0.171332	0.00108225	0.00422527	361	361
CEP72	0.388691	1.81757e-14	9.23393e-13	361	361
CEP76	0.254051	1.00475e-06	1.02561e-05	361	361
CEP78	0.527861	2.73579e-27	3.06085e-25	361	361
CEP97	0.225328	1.54558e-05	0.00011096	361	361
CER1	0.202704	0.000105169	0.000578414	361	28
CERK	-0.271625	1.5897e-07	2.05711e-06	361	361
CES1	-0.171674	0.00105725	0.00414796	361	361
CES2	-0.299677	6.31685e-09	1.18679e-07	361	361
CES3	-0.135454	0.00997788	0.0270316	361	360
CES7	-0.216686	3.29309e-05	0.00021411	361	330
CETP	-0.272592	1.43081e-07	1.88083e-06	361	361
CFB	-0.23904	4.37418e-06	3.69118e-05	361	361
CFC1B	0.126932	0.0158174	0.0396579	361	17
CFHR1	-0.123097	0.0193023	0.0469303	361	361
CFHR2	-0.195102	0.000191493	0.000963028	361	361
CFHR3	-0.194492	0.000200731	0.00100064	361	361
CFHR4	-0.343294	2.01683e-11	6.67194e-10	361	357
CFHR5	-0.132045	0.0120334	0.031658	361	358
CFH	-0.190153	0.000279504	0.00133261	361	361
CFI	-0.334292	7.12618e-11	2.10874e-09	361	361
CFL1	0.143331	0.00637297	0.0185864	361	361
CFP	-0.235182	6.28777e-06	5.07378e-05	361	361
CG030	0.240517	3.80066e-06	3.26391e-05	361	361
CGA	0.1481	0.00480665	0.0147336	361	189
CGB5	0.129447	0.0138425	0.0355066	361	40
CGB	0.199854	0.000132006	0.000702536	361	63
CGGBP1	0.182896	0.000478559	0.00210852	361	361
CGN	0.144897	0.00581458	0.0172497	361	361
CH25H	-0.231568	8.78489e-06	6.77318e-05	361	359
CHAC2	0.185156	0.000405649	0.0018273	361	361
CHADL	-0.231554	8.79615e-06	6.77923e-05	361	361
CHAF1A	0.543306	4.13132e-29	4.98638e-27	361	361
CHAF1B	0.534624	4.47988e-28	5.15704e-26	361	361
CHCHD5	-0.181957	0.000512317	0.00223305	361	361
CHD4	0.183823	0.000447291	0.00199075	361	361
CHD6	0.160964	0.0021569	0.00758035	361	361
CHD8	0.174888	0.00084658	0.00343164	361	361
CHD9	-0.23268	7.93046e-06	6.19292e-05	361	361
CHDH	-0.260179	5.3631e-07	5.94358e-06	361	361
CHEK1	0.448505	2.88076e-19	2.08619e-17	361	361
CHEK2	0.311059	1.53996e-09	3.34806e-08	361	361
CHGA	0.263813	3.66803e-07	4.27188e-06	361	219
CHI3L1	-0.168736	0.00129098	0.00490085	361	361
CHID1	-0.122865	0.0195331	0.0473757	361	361
CHKA	0.212865	4.55739e-05	0.000283029	361	361
CHKB-CPT1B	0.195257	0.000189198	0.000953675	361	361
CHML	0.404197	1.27593e-15	7.19834e-14	361	361
CHMP1B	-0.133119	0.0113491	0.0301197	361	361
CHMP2A	-0.126506	0.0161748	0.0404237	361	361
CHMP2B	0.216243	3.42044e-05	0.000221149	361	361
CHMP4B	0.137597	0.00885159	0.0245549	361	361
CHMP7	-0.151657	0.00387429	0.0122861	361	361
CHN2	-0.146988	0.00513721	0.0155861	361	361
CHORDC1	0.320377	4.63343e-10	1.14201e-08	361	361
CHP2	0.20423	9.29925e-05	0.000519188	361	135
CHRAC1	0.210716	5.45742e-05	0.000328909	361	361
CHRM2	-0.165944	0.00155636	0.00575579	361	79
CHRM3	0.125049	0.0174532	0.043124	361	340
CHRNA10	0.160639	0.00220261	0.00770102	361	360
CHRNA1	0.134376	0.0105916	0.028416	361	241
CHRNA4	-0.137165	0.00906911	0.0250258	361	320
CHRNA5	0.161241	0.00211858	0.00746622	361	348
CHRNA9	0.225979	1.45817e-05	0.000105368	361	38
CHRNG	0.206383	7.806e-05	0.000448777	361	111
CHST11	0.176646	0.000748485	0.00308387	361	361
CHST14	0.204265	9.2731e-05	0.000518164	361	361
CHST15	-0.288226	2.46005e-08	3.98956e-07	361	361
CHST8	-0.205023	8.72044e-05	0.000492255	361	269
CHSY3	-0.138774	0.00828199	0.0231977	361	361
CHTF18	0.492924	1.69062e-23	1.56598e-21	361	361
CHTF8	-0.171074	0.00110152	0.00429124	361	361
CHURC1	-0.32262	3.44838e-10	8.71503e-09	361	361
CIB2	0.225578	1.51144e-05	0.000108783	361	360
CIDEB	-0.224341	1.68754e-05	0.000119685	361	361
CIDECP	0.29805	7.69151e-09	1.40787e-07	361	361
CIRBP	-0.25253	1.1713e-06	1.1716e-05	361	361
CISD3	-0.160903	0.00216542	0.00760157	361	361
CISH	-0.154965	0.00315756	0.0104059	361	361
CIT	0.55963	3.8568e-31	5.22505e-29	361	361
CIZ1	0.265087	3.20629e-07	3.80305e-06	361	361
CKAP2L	0.657182	5.31818e-46	5.04341e-43	361	360
CKAP2	0.47222	1.89353e-21	1.57123e-19	361	361
CKAP4	0.244295	2.64185e-06	2.36993e-05	361	361
CKAP5	0.489804	3.51444e-23	3.18137e-21	361	361
CKLF	0.248118	1.81745e-06	1.71214e-05	361	361
CKMT1A	0.226858	1.34764e-05	9.82363e-05	361	219
CKMT1B	0.2491	1.64928e-06	1.57457e-05	361	276
CKM	0.182409	0.000495813	0.00217252	361	238
CKS1B	0.27212	1.50637e-07	1.96588e-06	361	361
CKS2	0.516196	5.6467e-26	5.9816e-24	361	361
CLASP2	0.206308	7.85356e-05	0.000450601	361	361
CLCA1	0.166497	0.00150011	0.0055773	361	19
CLCN2	0.361432	1.39741e-12	5.41427e-11	361	361
CLCN6	0.200819	0.000122265	0.000657908	361	361
CLDN10	-0.121735	0.0206921	0.0497026	361	244
CLDN15	-0.122017	0.0203977	0.0491257	361	361
CLDN18	0.297153	8.56813e-09	1.55263e-07	361	236
CLDN19	0.138976	0.00818781	0.0229759	361	303
CLDN2	-0.330512	1.19621e-10	3.35056e-09	361	361
CLDN4	0.150287	0.00421207	0.0131954	361	361
CLDN5	-0.253408	1.07224e-06	1.0856e-05	361	361
CLDN8	-0.146461	0.00530071	0.0159824	361	84
CLDND1	0.199345	0.000137427	0.000728467	361	361
CLEC14A	-0.307946	2.27937e-09	4.78332e-08	361	361
CLEC1A	-0.135577	0.00990997	0.0268732	361	360
CLEC1B	-0.20737	7.19964e-05	0.000418142	361	109
CLEC2A	0.146193	0.00538599	0.0161933	361	19
CLEC2D	0.231008	9.24798e-06	7.08632e-05	361	361
CLEC2L	0.324445	2.7068e-10	7.00177e-09	361	188
CLEC3B	-0.406931	7.87215e-16	4.51798e-14	361	361
CLEC4G	-0.249706	1.55308e-06	1.49346e-05	361	330
CLEC4M	-0.247155	1.99825e-06	1.86046e-05	361	205
CLEC5A	0.14459	0.00592025	0.0174774	361	322
CLEC9A	-0.164092	0.00175904	0.00639257	361	296
CLECL1	0.157042	0.0027712	0.00932396	361	323
CLGN	0.290948	1.79038e-08	3.00889e-07	361	353
CLIC1	0.212769	4.59465e-05	0.000284877	361	361
CLIC3	0.150409	0.00418098	0.0131125	361	348
CLK2P	0.216512	3.34262e-05	0.000216905	361	359
CLK2	0.282112	4.96171e-08	7.41279e-07	361	361
CLK3	0.221979	2.07944e-05	0.000143742	361	361
CLMN	-0.205515	8.37813e-05	0.000475764	361	361
CLN5	-0.169266	0.00124558	0.00475296	361	361
CLN6	0.375385	1.59277e-13	7.04891e-12	361	361
CLPB	-0.177297	0.000714907	0.0029655	361	361
CLPP	-0.154007	0.0033515	0.0109293	361	361
CLPS	0.160069	0.00228487	0.00794318	361	39
CLPTM1L	0.132685	0.0116212	0.0307314	361	361
CLRN1OS	-0.174596	0.000863954	0.00349282	361	162
CLSPN	0.488484	4.77867e-23	4.26759e-21	361	353
CLSTN1	0.189793	0.000287198	0.00136309	361	361
CLSTN2	-0.20063	0.000124116	0.000666427	361	344
CLTA	0.19613	0.000176813	0.000900108	361	361
CLTB	-0.171082	0.00110096	0.00428988	361	361
CLTCL1	-0.134097	0.0107558	0.0287944	361	361
CLU	-0.226714	1.36511e-05	9.94372e-05	361	361
CLVS2	0.141921	0.00691679	0.0198684	361	77
CLYBL	-0.301848	4.84849e-09	9.4384e-08	361	361
CMA1	-0.169448	0.00123039	0.00470312	361	171
CMAS	0.237052	5.27765e-06	4.33599e-05	361	361
CMPK1	-0.13889	0.00822753	0.0230647	361	361
CMTM1	0.232654	7.94967e-06	6.20367e-05	361	361
CMTM4	0.130738	0.0129157	0.0335529	361	361
CMTM5	-0.127674	0.0152105	0.0383926	361	104
CMTM6	0.149188	0.00450208	0.0139547	361	361
CMTM7	0.123783	0.018634	0.04555	361	361
CMTM8	0.152832	0.00360432	0.0115854	361	361
CN5H6.4	0.194601	0.000199044	0.000994223	361	347
CNDP2	-0.219161	2.65982e-05	0.000177217	361	361
CNGA3	0.190067	0.000281333	0.00133973	361	40
CNGB3	0.315812	8.38864e-10	1.95391e-08	361	132
CNIH2	0.292696	1.45741e-08	2.48922e-07	361	357
CNIH3	-0.212864	4.55774e-05	0.000283029	361	358
CNIH4	0.144343	0.00600679	0.0176751	361	361
CNKSR1	0.161811	0.00204173	0.0072428	361	334
CNN1	-0.146229	0.00537431	0.0161725	361	361
CNN2	0.125747	0.01683	0.0418405	361	361
CNNM1	-0.15913	0.00242669	0.00834609	361	342
CNNM4	0.232521	8.04772e-06	6.27035e-05	361	361
CNOT10	0.308926	2.01562e-09	4.284e-08	361	361
CNOT2	0.2123	4.77951e-05	0.000294323	361	361
CNOT3	0.314053	1.0517e-09	2.3855e-08	361	361
CNOT6L	-0.204714	8.94198e-05	0.000502057	361	361
CNOT6	0.259678	5.64866e-07	6.20481e-06	361	361
CNPY3	0.225402	1.53544e-05	0.000110351	361	361
CNPY4	0.261704	4.57578e-07	5.17765e-06	361	361
CNR1	0.222466	1.99215e-05	0.000138236	361	327
CNRIP1	-0.172963	0.000967498	0.00384662	361	361
CNTD1	0.195257	0.000189203	0.000953675	361	361
CNTD2	0.200643	0.000123991	0.000665933	361	357
CNTLN	0.224885	1.60779e-05	0.00011497	361	361
CNTN5	0.192	0.000242974	0.00118164	361	136
CNTNAP1	0.282142	4.94444e-08	7.39253e-07	361	361
CNTNAP2	-0.228172	1.19703e-05	8.85543e-05	361	351
CNTNAP3	-0.230063	1.00822e-05	7.64613e-05	361	357
CNTNAP4	0.337035	4.87148e-11	1.49484e-09	361	185
CNTNAP5	0.196447	0.000172498	0.000880395	361	67
COBLL1	-0.253929	1.01727e-06	1.03732e-05	361	361
COBRA1	0.217074	3.18503e-05	0.000207626	361	361
COCH	0.192782	0.000228901	0.00112142	361	352
COIL	0.323209	3.18965e-10	8.123e-09	361	361
COL11A1	0.164739	0.00168556	0.00616153	361	261
COL14A1	-0.177433	0.000708058	0.00294138	361	361
COL18A1	-0.227674	1.25213e-05	9.21175e-05	361	361
COL23A1	-0.19818	0.000150642	0.000786377	361	360
COL24A1	0.325145	2.46554e-10	6.45221e-09	361	298
COL25A1	-0.287719	2.60907e-08	4.21067e-07	361	258
COL27A1	0.154543	0.00324175	0.0106236	361	361
COL28A1	0.229796	1.03308e-05	7.80494e-05	361	210
COL4A3BP	-0.201444	0.000116328	0.000630213	361	361
COL5A2	0.135837	0.00976817	0.0265647	361	361
COL8A1	-0.141667	0.00701876	0.0201207	361	355
COL9A2	0.249342	1.61021e-06	1.54318e-05	361	360
COL9A3	0.180572	0.000566124	0.00243296	361	355
COLEC10	-0.315937	8.25421e-10	1.92711e-08	361	348
COLEC11	-0.140901	0.00733548	0.0208933	361	361
COMMD10	0.169598	0.00121793	0.00466353	361	361
COMMD2	0.406889	7.93055e-16	4.53842e-14	361	361
COMMD4	0.162089	0.00200511	0.00713959	361	361
COMMD6	-0.133368	0.0111951	0.0297902	361	361
COMMD7	0.13867	0.00833117	0.023316	361	361
COMMD8	0.181114	0.000544455	0.00235253	361	361
COMTD1	-0.14091	0.00733173	0.0208886	361	361
COMT	-0.213463	4.33314e-05	0.000270922	361	361
COPA	0.203003	0.000102671	0.000565615	361	361
COPB1	0.236768	5.42059e-06	4.44426e-05	361	361
COPB2	0.205581	8.33346e-05	0.000473768	361	361
COPE	0.16625	0.00152503	0.00565885	361	361
COPG	0.271076	1.68743e-07	2.16808e-06	361	361
COPS2	0.14637	0.00532956	0.0160523	361	361
COPS4	-0.230174	9.98013e-06	7.58604e-05	361	361
COPS7B	0.192722	0.000229956	0.00112603	361	361
COPZ1	0.177758	0.00069197	0.0028823	361	361
COPZ2	-0.168539	0.00130832	0.00495629	361	361
COQ3	0.188652	0.000312908	0.00146936	361	361
COQ4	-0.305403	3.12932e-09	6.35923e-08	361	361
COQ6	-0.247847	1.86669e-06	1.75355e-05	361	361
COQ9	-0.264986	3.24058e-07	3.83915e-06	361	361
CORO1C	0.236966	5.32084e-06	4.36607e-05	361	361
CORO2A	0.146023	0.00544048	0.0163321	361	361
CORO6	0.152011	0.00379119	0.0120822	361	359
COX10	-0.148036	0.00482515	0.014779	361	361
COX11	0.136665	0.00932653	0.0255933	361	361
COX15	-0.22184	2.105e-05	0.000145358	361	361
COX18	-0.260708	5.07627e-07	5.68263e-06	361	361
COX4I1	-0.14276	0.00658844	0.0191266	361	361
COX7A1	-0.191717	0.000248275	0.00120448	361	361
COX7B2	0.317981	6.33466e-10	1.51811e-08	361	193
CPA2	0.172994	0.000965447	0.00383923	361	111
CPA3	-0.15004	0.0042759	0.013366	361	325
CPB2	-0.211099	5.28581e-05	0.000320651	361	360
CPEB3	-0.249819	1.5358e-06	1.47898e-05	361	361
CPEB4	-0.168135	0.0013443	0.00507714	361	361
CPE	0.122911	0.0194873	0.0472992	361	361
CPLX1	-0.142632	0.00663768	0.0192303	361	361
CPLX3	0.137374	0.00896339	0.0247856	361	187
CPM	0.187151	0.000350005	0.00161052	361	361
CPN2	-0.15128	0.00396489	0.01252	361	359
CPNE1	0.199504	0.000135707	0.000719928	361	361
CPNE4	0.268141	2.31572e-07	2.845e-06	361	116
CPNE6	0.146699	0.00522642	0.0157854	361	228
CPOX	0.124799	0.0176805	0.0435728	361	361
CPO	-0.258191	6.58604e-07	7.11285e-06	361	221
CPPED1	-0.187697	0.000336045	0.00155708	361	361
CPSF3	0.213393	4.35907e-05	0.000272305	361	361
CPSF4	0.189275	0.000298611	0.00141054	361	361
CPSF6	0.412298	3.01092e-16	1.7793e-14	361	361
CPSF7	0.27297	1.37291e-07	1.8107e-06	361	361
CPT1A	-0.144784	0.00585339	0.0173262	361	361
CPT1B	0.125567	0.0169884	0.0421609	361	361
CPT1C	-0.138831	0.00825548	0.0231365	361	361
CPT2	-0.313865	1.07735e-09	2.43534e-08	361	361
CPXM2	-0.192819	0.000228249	0.00111905	361	361
CR1L	0.159779	0.00232789	0.0080682	361	158
CRADD	-0.212378	4.74844e-05	0.00029259	361	361
CRAMP1L	0.145301	0.00567756	0.0169214	361	361
CRAT	-0.248168	1.80847e-06	1.70529e-05	361	361
CREB1	0.218024	2.93488e-05	0.000193408	361	361
CREB3L2	0.166856	0.00146463	0.00546014	361	361
CREB3L4	0.215946	3.50857e-05	0.000226346	361	361
CREB3	0.161463	0.00208838	0.00737805	361	361
CREBL2	-0.207609	7.05909e-05	0.000411539	361	361
CREBZF	0.151283	0.00396416	0.01252	361	361
CREG2	0.209798	5.89108e-05	0.000351787	361	210
CRHBP	-0.327633	1.76622e-10	4.7597e-09	361	358
CRH	0.150026	0.00427953	0.0133731	361	73
CRIM1	-0.273672	1.27133e-07	1.70171e-06	361	361
CRIP2	-0.225184	1.56553e-05	0.000112149	361	361
CRISP2	0.139099	0.00813058	0.0228443	361	82
CRISPLD2	-0.183056	0.000473038	0.00208696	361	360
CRKL	0.183125	0.000470667	0.00207855	361	361
CRK	-0.274133	1.20865e-07	1.62967e-06	361	361
CRLF3	0.303504	3.95689e-09	7.87228e-08	361	361
CRLS1	-0.228241	1.18964e-05	8.82375e-05	361	361
CRNKL1	0.163486	0.00183039	0.00660965	361	361
CROCCL2	0.300388	5.79393e-09	1.10629e-07	361	361
CROCC	0.178708	0.000646853	0.00272233	361	361
CRTAC1	-0.206817	7.53343e-05	0.000435369	361	246
CRTC2	0.138392	0.00846339	0.0236161	361	361
CRTC3	0.152862	0.00359769	0.0115692	361	361
CRY1	0.206945	7.45474e-05	0.000431573	361	361
CRY2	-0.185272	0.000402181	0.00181537	361	361
CRYAB	-0.146494	0.0052904	0.0159561	361	361
CRYGS	0.159568	0.00235966	0.00815703	361	361
CRYL1	-0.283612	4.18329e-08	6.38393e-07	361	361
CRYM	-0.139007	0.00817332	0.022945	361	360
CRYZ	-0.159816	0.00232244	0.00805211	361	361
CSAD	-0.198372	0.000148383	0.000777644	361	361
CSAG1	0.283377	4.29691e-08	6.54228e-07	361	231
CSAG2	0.325293	2.4175e-10	6.34314e-09	361	110
CSAG3	0.314981	9.33539e-10	2.14187e-08	361	234
CSE1L	0.355688	3.31548e-12	1.22957e-10	361	361
CSF3	-0.149493	0.00441983	0.0137468	361	131
CSGALNACT1	-0.172595	0.000992385	0.00392909	361	361
CSH1	0.149578	0.00439717	0.0136892	361	9
CSH2	0.223468	1.82339e-05	0.000127997	361	24
CSMD1	0.315562	8.66292e-10	2.00374e-08	361	241
CSMD3	0.249929	1.51909e-06	1.46786e-05	361	123
CSN2	-0.250362	1.45506e-06	1.41491e-05	361	63
CSNK1A1P	0.127907	0.0150239	0.0380081	361	271
CSNK1A1	-0.183451	0.000459611	0.00203675	361	361
CSNK1D	0.216319	3.39841e-05	0.000219881	361	361
CSNK1E	0.220297	2.40938e-05	0.000162874	361	361
CSNK1G1	0.245195	2.42053e-06	2.19813e-05	361	361
CSNK2A1	0.176605	0.000750649	0.00309186	361	361
CSNK2B	0.158994	0.0024479	0.00841096	361	361
CSPG5	0.270648	1.76749e-07	2.25638e-06	361	358
CSRNP1	-0.19454	0.000199985	0.000997673	361	361
CSRNP2	0.192053	0.000241998	0.00117858	361	361
CSRNP3	0.236327	5.64945e-06	4.61291e-05	361	221
CSRP3	0.122064	0.0203493	0.0490269	361	20
CST3	-0.187198	0.000348778	0.00160562	361	361
CST9L	0.147336	0.00503171	0.0153315	361	14
CSTA	0.180334	0.000575866	0.00246526	361	361
CSTB	0.178831	0.000641215	0.00270317	361	361
CSTF2	0.335907	5.69899e-11	1.73011e-09	361	361
CSTF3	0.248414	1.76519e-06	1.6716e-05	361	361
CT45A1	0.259697	5.63755e-07	6.19601e-06	361	75
CT45A2	0.194231	0.000204813	0.00101869	361	36
CT45A3	0.236956	5.32584e-06	4.36837e-05	361	34
CT45A4	0.210314	5.64366e-05	0.000339045	361	25
CT45A5	0.287317	2.73329e-08	4.3792e-07	361	56
CT47A1	0.144789	0.00585155	0.0173262	361	38
CT47A2	0.147949	0.00485057	0.0148431	361	49
CT47A6	0.121609	0.0208245	0.0499724	361	40
CT47A7	0.193204	0.000221622	0.00109109	361	11
CT47A9	0.149219	0.00449371	0.0139331	361	17
CT47B1	0.295118	1.09329e-08	1.92886e-07	361	107
CTAG1B	0.333547	7.89611e-11	2.31251e-09	361	178
CTAG2	0.326075	2.17729e-10	5.75076e-09	361	177
CTAGE4	0.239158	4.32541e-06	3.65622e-05	361	354
CTAGE5	-0.14128	0.00717733	0.0205103	361	361
CTAGE6	0.197742	0.000155903	0.000810019	361	319
CTAGE9	0.238673	4.52901e-06	3.8025e-05	361	361
CTBS	-0.204175	9.3408e-05	0.00052107	361	361
CTCFL	0.233288	7.49782e-06	5.89728e-05	361	356
CTDSP1	-0.141153	0.00722966	0.0206421	361	361
CTDSPL2	0.287499	2.67646e-08	4.29505e-07	361	361
CTGF	-0.150598	0.00413333	0.0129814	361	361
CTHRC1	0.128942	0.0142207	0.0362804	361	361
CTH	-0.122629	0.0197709	0.0478301	361	361
CTLA4	0.194808	0.000195896	0.000980955	361	347
CTNNA2	-0.250421	1.44648e-06	1.40864e-05	361	258
CTNND2	0.175875	0.000790132	0.00322978	361	273
CTNS	-0.159443	0.00237862	0.00821117	361	361
CTRL	0.26889	2.1367e-07	2.65124e-06	361	356
CTSD	-0.156161	0.00292948	0.00977065	361	361
CTSF	-0.25184	1.25535e-06	1.24627e-05	361	361
CTSG	-0.19448	0.000200918	0.00100132	361	290
CTSL2	0.297134	8.58817e-09	1.55485e-07	361	345
CTSO	-0.281957	5.04959e-08	7.5215e-07	361	361
CTTNBP2	-0.275669	1.02045e-07	1.41029e-06	361	344
CTXN2	0.212682	4.62819e-05	0.00028651	361	78
CTXN3	0.130529	0.0130619	0.0338753	361	11
CUL2	0.178261	0.000667714	0.00279771	361	361
CUL5	-0.135976	0.00969259	0.0264132	361	361
CUL7	0.181459	0.000531073	0.00230421	361	361
CUX1	-0.329349	1.40078e-10	3.8478e-09	361	361
CUX2	-0.196172	0.000176237	0.000897636	361	358
CUZD1	0.355601	3.35834e-12	1.24315e-10	361	336
CWC22	0.203049	0.00010229	0.000563671	361	361
CWC27	0.335161	6.32004e-11	1.89553e-09	361	361
CX3CL1	-0.231977	8.46137e-06	6.54401e-05	361	361
CX3CR1	-0.162776	0.00191742	0.00687776	361	360
CXADRP3	0.14829	0.00475232	0.0145986	361	255
CXCL12	-0.243255	2.92186e-06	2.58847e-05	361	361
CXCL13	0.145926	0.00547184	0.0164108	361	316
CXCL14	-0.12316	0.0192407	0.0468147	361	320
CXCL2	-0.164118	0.00175603	0.00638514	361	361
CXCL3	0.136148	0.00959986	0.0261928	361	327
CXCL5	0.143368	0.00635948	0.0185596	361	287
CXCR1	-0.15342	0.00347582	0.0112591	361	338
CXCR2	-0.124919	0.0175713	0.0433621	361	336
CXXC1	0.237264	5.17367e-06	4.2664e-05	361	361
CXXC4	0.3047	3.4139e-09	6.88135e-08	361	280
CXXC5	0.17686	0.000737257	0.00304363	361	361
CXorf36	-0.224407	1.67772e-05	0.000119158	361	361
CXorf40A	-0.173532	0.00093022	0.00372144	361	361
CXorf48	0.311071	1.53759e-09	3.34657e-08	361	139
CXorf49B	0.26255	4.18828e-07	4.80181e-06	361	78
CXorf57	0.290558	1.87411e-08	3.14165e-07	361	361
CXorf61	0.31288	1.22182e-09	2.74014e-08	361	66
CXorf65	0.200507	0.000125336	0.000671708	361	212
CXorf66	-0.154918	0.00316671	0.010424	361	191
CYB561D1	0.126948	0.015804	0.0396388	361	361
CYB5A	-0.176304	0.000766707	0.00314435	361	361
CYB5D1	-0.293033	1.40042e-08	2.40426e-07	361	361
CYB5D2	-0.41654	1.39132e-16	8.49943e-15	361	361
CYB5R1	-0.178246	0.000668406	0.00279943	361	361
CYB5R2	0.160679	0.0021969	0.00768643	361	359
CYB5R3	-0.187625	0.000337871	0.00156384	361	361
CYB5RL	0.210714	5.45841e-05	0.000328909	361	361
CYGB	-0.305861	2.95639e-09	6.03862e-08	361	361
CYLC2	0.13855	0.00838791	0.0234417	361	8
CYP11A1	-0.17684	0.000738297	0.00304729	361	337
CYP11B1	-0.138041	0.00863288	0.0240184	361	30
CYP11B2	-0.133737	0.0109709	0.029293	361	27
CYP19A1	0.292754	1.44744e-08	2.47857e-07	361	253
CYP1A1	-0.22364	1.79593e-05	0.000126384	361	348
CYP1A2	-0.269009	2.10948e-07	2.624e-06	361	331
CYP1B1	-0.12656	0.0161287	0.040347	361	361
CYP21A2	-0.126841	0.0158931	0.0398177	361	361
CYP24A1	0.245312	2.39298e-06	2.17707e-05	361	95
CYP27A1	-0.279912	6.35976e-08	9.27193e-07	361	361
CYP27B1	0.24598	2.24202e-06	2.05286e-05	361	358
CYP27C1	0.170867	0.00111722	0.00434728	361	340
CYP2C19	-0.133066	0.011382	0.0301867	361	354
CYP2C8	-0.225823	1.47873e-05	0.000106606	361	361
CYP2C9	-0.263235	3.89768e-07	4.50627e-06	361	361
CYP2D6	-0.127504	0.0153477	0.0386946	361	361
CYP2E1	-0.323184	3.20017e-10	8.13938e-09	361	361
CYP2F1	0.217316	3.11958e-05	0.000203961	361	95
CYP2J2	-0.172802	0.000978344	0.00387968	361	361
CYP2R1	0.243998	2.71923e-06	2.43386e-05	361	361
CYP2U1	-0.13442	0.0105657	0.0283695	361	361
CYP39A1	-0.131491	0.0124007	0.0324733	361	358
CYP3A43	-0.152358	0.0037112	0.0118704	361	340
CYP3A4	-0.317803	6.48303e-10	1.54993e-08	361	359
CYP3A5	-0.156561	0.00285657	0.0095627	361	360
CYP46A1	-0.210427	5.59053e-05	0.000336278	361	356
CYP4A11	-0.238055	4.80148e-06	4.00796e-05	361	361
CYP4A22	-0.178293	0.00066619	0.0027925	361	349
CYP4F11	-0.160641	0.00220225	0.00770102	361	361
CYP4F22	0.160717	0.0021915	0.00766999	361	358
CYP4F2	-0.210902	5.37358e-05	0.000324977	361	359
CYP4F3	-0.146898	0.00516499	0.0156481	361	361
CYP4V2	-0.236517	5.55e-06	4.53915e-05	361	361
CYP4Z2P	0.140633	0.00744926	0.021178	361	172
CYP7B1	-0.209041	6.27289e-05	0.000371357	361	360
CYP8B1	-0.173565	0.00092807	0.00371359	361	361
CYR61	-0.25349	1.06332e-06	1.07931e-05	361	361
CYYR1	-0.296491	9.27707e-09	1.67046e-07	361	361
D2HGDH	-0.278447	7.49436e-08	1.0722e-06	361	361
D4S234E	-0.139828	0.00780033	0.0220377	361	341
DAAM1	-0.22907	1.10358e-05	8.26234e-05	361	361
DAAM2	-0.157859	0.00263143	0.00892151	361	361
DACH2	0.139897	0.00776957	0.0219601	361	161
DACT3	-0.12915	0.0140637	0.0359536	361	359
DAD1L	0.196327	0.000174119	0.000887986	361	30
DAK	-0.148279	0.00475552	0.0146061	361	361
DALRD3	0.150528	0.00415081	0.0130281	361	361
DAND5	0.234661	6.60077e-06	5.28992e-05	361	294
DAO	-0.125991	0.0166165	0.0413685	361	360
DARC	-0.138276	0.00851902	0.0237547	361	337
DARS2	0.275374	1.0543e-07	1.44603e-06	361	361
DARS	0.137736	0.0087824	0.0243866	361	361
DAXX	0.175359	0.000819189	0.0033335	361	361
DAZAP1	0.327776	1.73262e-10	4.68819e-09	361	361
DBF4B	0.540182	9.8176e-29	1.14338e-26	361	361
DBF4	0.551333	4.28401e-30	5.46898e-28	361	361
DBI	0.142919	0.00652789	0.0189702	361	361
DBNDD2	0.218257	2.8764e-05	0.000190146	361	361
DBR1	0.272297	1.47751e-07	1.93329e-06	361	361
DBT	-0.168429	0.00131799	0.00498913	361	361
DBX1	0.159835	0.00231959	0.0080439	361	25
DCAF12L1	0.162545	0.00194651	0.00696456	361	71
DCAF12L2	0.171452	0.00107345	0.00419717	361	87
DCAF12	0.208331	6.65193e-05	0.000390776	361	361
DCAF13	0.125961	0.016643	0.0414254	361	361
DCAF15	0.263924	3.62522e-07	4.2319e-06	361	361
DCAF16	0.268549	2.21655e-07	2.73837e-06	361	361
DCAF17	0.133409	0.0111701	0.0297398	361	361
DCAF4L1	0.197795	0.000155254	0.00080686	361	354
DCAF4L2	0.269191	2.06857e-07	2.57956e-06	361	196
DCAF6	-0.130337	0.0131977	0.0341758	361	361
DCAF8L1	0.297269	8.44997e-09	1.53401e-07	361	124
DCAF8L2	0.257879	6.80084e-07	7.3057e-06	361	146
DCAF8	-0.249626	1.56549e-06	1.50395e-05	361	361
DCBLD2	0.204663	8.97911e-05	0.000503858	361	361
DCDC1	0.256595	7.75753e-07	8.16118e-06	361	152
DCI	-0.27687	8.9342e-08	1.25653e-06	361	361
DCK	0.270638	1.76951e-07	2.25752e-06	361	361
DCLK3	0.191987	0.000243224	0.00118257	361	331
DCLRE1A	0.203102	0.000101851	0.000561724	361	361
DCLRE1B	0.36206	1.27021e-12	4.97956e-11	361	361
DCLRE1C	0.319543	5.1679e-10	1.25664e-08	361	361
DCN	-0.189859	0.000285778	0.00135733	361	358
DCP1B	0.126187	0.0164473	0.0410051	361	361
DCP2	0.263162	3.92788e-07	4.52945e-06	361	361
DCTN1	0.129917	0.0134984	0.0348033	361	361
DCUN1D2	0.203396	9.94709e-05	0.000550567	361	361
DCUN1D5	0.230063	1.00822e-05	7.64613e-05	361	361
DCXR	-0.224017	1.73677e-05	0.000122869	361	361
DDAH2	0.170076	0.00117908	0.00453835	361	361
DDHD1	0.299301	6.61213e-09	1.23876e-07	361	361
DDHD2	0.134114	0.0107454	0.0287774	361	361
DDN	0.319705	5.05939e-10	1.23629e-08	361	279
DDOST	0.27253	1.44047e-07	1.89228e-06	361	361
DDR1	0.185976	0.000381838	0.00173972	361	361
DDRGK1	-0.228595	1.15211e-05	8.59016e-05	361	361
[truncated: 6,301 more rows]
